# Supplementary material for: The role of trauma and positive youth development in polysubstance use among rural middle school students: a latent class analysis
Source: Springer Nature journal article supplement (doi:10.1186/s12889-022-14795-1), 2022-12-14
Supplement: MOESM2 [file 23826284]

| record_id | redcap_event_name | pre_program | pre_cohort | survey_year | pre_site | age_pre | grade_pre |
|-----------|-------------------|-------------|------------|-------------|----------|---------|-----------|
| 1         | presurvey_arm_1   | 1           | 230        | 4           | 1        | 11      | 6         |
| 2         | presurvey_arm_1   | 1           | 230        | 4           | 1        | 11      | 6         |
| 3         | presurvey_arm_1   | 1           | 230        | 3           | 1        | 11      | 6         |
| 4         | presurvey_arm_1   | 1           | 230        | 4           | 1        | 12      | 6         |
| 5         | presurvey_arm_1   | 1           | 230        | 4           | 1        | 11      | 6         |
| 6         | presurvey_arm_1   | 1           | 230        | 4           | 1        | 11      | 6         |
| 7         | presurvey_arm_1   | 1           | 230        | 4           | 1        | 11      | 6         |
| 8         | presurvey_arm_1   | 1           | 230        | 3           | 1        | 11      | 6         |
| 9         | presurvey_arm_1   | 1           | 230        | 4           | 1        | 11      | 6         |
| 10        | presurvey_arm_1   | 1           | 230        | 4           | 1        | 11      | 6         |
| 11        | presurvey_arm_1   | 1           | 230        | 4           | 1        | 11      | 6         |
| 12        | presurvey_arm_1   | 1           | 230        | 4           | 1        | 11      | 6         |
| 13        | presurvey_arm_1   | 1           | 230        | 4           | 1        | 11      | 6         |
| 14        | presurvey_arm_1   | 1           | 230        | 3           | 1        | 11      | 6         |
| 15        | presurvey_arm_1   | 1           | 230        | 3           | 1        | 11      | 6         |
| 16        | presurvey_arm_1   | 1           | 230        | 4           | 1        | 11      | 6         |
| 17        | presurvey_arm_1   | 1           | 230        | 4           | 1        | 11      | 6         |
| 18        | presurvey_arm_1   | 1           | 230        | 4           | 1        | 13      | 6         |
| 19        | presurvey_arm_1   | 1           | 230        | 4           | 1        | 11      | 6         |
| 20        | presurvey_arm_1   | 1           | 230        | 4           | 1        | 12      | 6         |
| 21        | presurvey_arm_1   | 1           | 230        | 4           | 1        | 11      | 6         |
| 22        | presurvey_arm_1   | 1           | 230        | 4           | 1        | 11      | 6         |
| 23        | presurvey_arm_1   | 1           | 230        | 4           | 1        | 11      | 6         |
| 24        | presurvey_arm_1   | 1           | 231        | 4           | 1        | 11      | 6         |
| 25        | presurvey_arm_1   | 1           | 231        | 4           | 1        | 11      | 6         |
| 26        | presurvey_arm_1   | 1           | 231        | 4           | 1        | 11      | 6         |
| 27        | presurvey_arm_1   | 1           | 231        | 4           | 1        | 11      | 6         |
| 28        | presurvey_arm_1   | 1           | 231        | 4           | 1        | 11      | 6         |
| 29        | presurvey_arm_1   | 1           | 231        | 4           | 1        | 11      | 6         |
| 30        | presurvey_arm_1   | 1           | 231        | 4           | 1        | 11      | 6         |
| 31        | presurvey_arm_1   | 1           | 231        | 4           | 1        | 12      | 6         |
| 32        | presurvey_arm_1   | 1           | 231        | 4           | 1        | 12      | 6         |
| 33        | presurvey_arm_1   | 1           | 231        | 4           | 1        | 11      | 6         |
| 34        | presurvey_arm_1   | 1           | 231        | 4           | 1        | 11      | 6         |
| 35        | presurvey_arm_1   | 1           | 231        | 4           | 1        | 11      | 6         |
| 36        | presurvey_arm_1   | 1           | 231        | 4           | 1        | 11      | 6         |
| 37        | presurvey_arm_1   | 1           | 231        | 4           | 1        | 11      | 6         |
| 38        | presurvey_arm_1   | 1           | 231        | 4           | 1        | 11      | 6         |
| 39        | presurvey_arm_1   | 1           | 231        | 4           | 1        | 11      | 6         |
| 40        | presurvey_arm_1   | 1           | 231        | 4           | 1        | 11      | 6         |
| 41        | presurvey_arm_1   | 1           | 231        | 4           | 1        | 12      | 6         |
| 42        | presurvey_arm_1   | 1           | 231        | 4           | 1        | 11      | 6         |
| 43        | presurvey_arm_1   | 1           | 231        | 4           | 1        | 11      | 6         |
| 44        | presurvey_arm_1   | 1           | 231        | 4           | 1        | 11      | 6         |
| 45        | presurvey_arm_1   | 2           | 232        | 3           | 1        | 12      | 7         |
| 46        | presurvey_arm_1   | 2           | 232        | 4           | 1        | 12      | 7         |
| 47        | presurvey_arm_1   | 2           | 232        | 4           | 1        | 13      | 7         |

|    |                 |   |     |   |   |    |   |
|----|-----------------|---|-----|---|---|----|---|
| 48 | presurvey_arm_1 | 2 | 232 | 4 | 1 | 12 | 7 |
| 49 | presurvey_arm_1 | 2 | 232 | 4 | 1 | 12 | 7 |
| 50 | presurvey_arm_1 | 2 | 232 | 4 | 1 | 12 | 7 |
| 51 | presurvey_arm_1 | 2 | 232 | 4 | 1 | 12 | 7 |
| 52 | presurvey_arm_1 | 2 | 232 | 4 | 1 | 12 | 7 |
| 53 | presurvey_arm_1 | 2 | 232 | 4 | 1 | 12 | 7 |
| 54 | presurvey_arm_1 | 2 | 232 | 4 | 1 | 12 | 7 |
| 55 | presurvey_arm_1 | 2 | 232 | 4 | 1 | 12 | 7 |
| 56 | presurvey_arm_1 | 2 | 232 | 4 | 1 | 12 | 7 |
| 57 | presurvey_arm_1 | 2 | 232 | 4 | 1 | 12 | 7 |
| 58 | presurvey_arm_1 | 2 | 232 | 4 | 1 | 12 | 7 |
| 59 | presurvey_arm_1 | 2 | 232 | 4 | 1 | 12 | 7 |
| 60 | presurvey_arm_1 | 2 | 232 | 4 | 1 | 12 | 7 |
| 61 | presurvey_arm_1 | 2 | 233 | 4 | 1 | 13 | 7 |
| 62 | presurvey_arm_1 | 2 | 233 | 4 | 1 | 12 | 7 |
| 63 | presurvey_arm_1 | 2 | 233 | 4 | 1 | 12 | 7 |
| 64 | presurvey_arm_1 | 2 | 233 | 4 | 1 | 12 | 7 |
| 65 | presurvey_arm_1 | 2 | 233 | 4 | 1 | 12 | 7 |
| 66 | presurvey_arm_1 | 2 | 233 | 4 | 1 | 12 | 7 |
| 67 | presurvey_arm_1 | 2 | 233 | 4 | 1 | 11 | 7 |
| 68 | presurvey_arm_1 | 2 | 233 | 4 | 1 | 12 | 7 |
| 69 | presurvey_arm_1 | 2 | 233 | 4 | 1 | 12 | 7 |
| 70 | presurvey_arm_1 | 2 | 233 | 4 | 1 | 12 | 7 |
| 71 | presurvey_arm_1 | 2 | 233 | 4 | 1 | 12 | 7 |
| 72 | presurvey_arm_1 | 2 | 233 | 4 | 1 | 12 | 7 |
| 73 | presurvey_arm_1 | 2 | 233 | 4 | 1 | 12 | 7 |
| 74 | presurvey_arm_1 | 2 | 233 | 4 | 1 | 12 | 7 |
| 75 | presurvey_arm_1 | 2 | 233 | 4 | 1 | 12 | 7 |
| 76 | presurvey_arm_1 | 2 | 233 | 4 | 1 | 13 | 7 |
| 77 | presurvey_arm_1 | 2 | 233 | 4 | 1 | 12 | 7 |
| 78 | presurvey_arm_1 | 2 | 233 | 4 | 1 | 12 | 7 |
| 79 | presurvey_arm_1 | 2 | 233 | 3 | 1 | 12 | 7 |
| 80 | presurvey_arm_1 | 2 | 233 | 4 | 1 | 12 | 7 |
| 81 | presurvey_arm_1 | 2 | 233 | 4 | 1 | 13 | 7 |
| 82 | presurvey_arm_1 | 2 | 233 | 4 | 1 | 12 | 7 |
| 83 | presurvey_arm_1 | 2 | 233 | 4 | 1 | 12 | 7 |
| 84 | presurvey_arm_1 | 3 | 234 | 4 | 1 | 13 | 8 |
| 85 | presurvey_arm_1 | 3 | 234 | 4 | 1 | 13 | 8 |
| 86 | presurvey_arm_1 | 3 | 234 | 4 | 1 | 13 | 8 |
| 87 | presurvey_arm_1 | 3 | 234 | 4 | 1 | 14 | 8 |
| 88 | presurvey_arm_1 | 3 | 234 | 4 | 1 | 13 | 8 |
| 89 | presurvey_arm_1 | 3 | 234 | 3 | 1 | 13 | 8 |
| 90 | presurvey_arm_1 | 3 | 234 | 4 | 1 | 13 | 8 |
| 91 | presurvey_arm_1 | 3 | 234 | 4 | 1 | 14 | 8 |
| 92 | presurvey_arm_1 | 3 | 234 | 4 | 1 | 13 | 8 |
| 93 | presurvey_arm_1 | 3 | 234 | 3 | 1 | 13 | 8 |
| 94 | presurvey_arm_1 | 3 | 234 | 4 | 1 | 13 | 8 |
| 95 | presurvey_arm_1 | 3 | 234 | 4 | 1 | 13 | 8 |

|     |                 |   |     |   |   |    |   |
|-----|-----------------|---|-----|---|---|----|---|
| 96  | presurvey_arm_1 | 3 | 234 | 4 | 1 | 14 | 8 |
| 97  | presurvey_arm_1 | 3 | 234 | 4 | 1 | 14 | 8 |
| 98  | presurvey_arm_1 | 3 | 234 | 4 | 1 | 13 | 8 |
| 99  | presurvey_arm_1 | 3 | 234 | 4 | 1 | 13 | 8 |
| 100 | presurvey_arm_1 | 3 | 235 | 4 | 1 | 13 | 8 |
| 101 | presurvey_arm_1 | 3 | 235 | 4 | 1 | 13 | 8 |
| 102 | presurvey_arm_1 | 3 | 235 | 4 | 1 | 13 | 8 |
| 103 | presurvey_arm_1 | 3 | 235 | 4 | 1 | 13 | 8 |
| 104 | presurvey_arm_1 | 3 | 235 | 4 | 1 | 13 | 8 |
| 105 | presurvey_arm_1 | 3 | 235 | 4 | 1 | 13 | 8 |
| 106 | presurvey_arm_1 | 3 | 235 | 4 | 1 | 14 | 8 |
| 107 | presurvey_arm_1 | 3 | 235 | 4 | 1 | 13 | 8 |
| 108 | presurvey_arm_1 | 3 | 235 | 4 | 1 | 13 | 8 |
| 109 | presurvey_arm_1 | 3 | 235 | 4 | 1 | 13 | 8 |
| 110 | presurvey_arm_1 | 3 | 235 | 4 | 1 | 13 | 8 |
| 111 | presurvey_arm_1 | 3 | 235 | 4 | 1 | 13 | 8 |
| 112 | presurvey_arm_1 | 3 | 235 | 4 | 1 | 14 | 8 |
| 113 | presurvey_arm_1 | 3 | 235 | 4 | 1 | 13 | 8 |
| 114 | presurvey_arm_1 | 3 | 235 | 4 | 1 | 14 | 8 |
| 115 | presurvey_arm_1 | 3 | 235 | 4 | 1 | 13 | 8 |
| 226 | presurvey_arm_1 | 2 | 241 | 4 | 1 | 12 | 7 |
| 227 | presurvey_arm_1 | 2 | 241 | 4 | 1 | 12 | 7 |
| 228 | presurvey_arm_1 | 2 | 241 | 4 | 1 | 13 | 7 |
| 229 | presurvey_arm_1 | 2 | 241 | 4 | 1 | 13 | 7 |
| 230 | presurvey_arm_1 | 2 | 241 | 4 | 1 | 12 | 7 |
| 231 | presurvey_arm_1 | 2 | 241 | 4 | 1 | 12 | 7 |
| 232 | presurvey_arm_1 | 2 | 241 | 4 | 1 | 12 | 7 |
| 233 | presurvey_arm_1 | 2 | 241 | 3 | 1 | 13 | 7 |
| 234 | presurvey_arm_1 | 2 | 241 | 4 | 1 | 12 | 7 |
| 235 | presurvey_arm_1 | 2 | 241 | 4 | 1 | 12 | 7 |
| 236 | presurvey_arm_1 | 2 | 241 | 3 | 1 | 16 | 7 |
| 237 | presurvey_arm_1 | 2 | 241 | 4 | 1 | 12 | 7 |
| 238 | presurvey_arm_1 | 2 | 241 | 4 | 1 | 12 | 7 |
| 239 | presurvey_arm_1 | 2 | 241 | 4 | 1 | 13 | 7 |
| 240 | presurvey_arm_1 | 2 | 241 | 4 | 1 | 12 | 7 |
| 241 | presurvey_arm_1 | 2 | 241 | 4 | 1 | 12 | 7 |
| 242 | presurvey_arm_1 | 2 | 241 | 4 | 1 | 12 | 7 |
| 243 | presurvey_arm_1 | 2 | 242 | 4 | 1 | 12 | 7 |
| 244 | presurvey_arm_1 | 2 | 242 | 4 | 1 | 12 | 7 |
| 245 | presurvey_arm_1 | 2 | 242 | 4 | 1 | 13 | 7 |
| 246 | presurvey_arm_1 | 2 | 242 | 4 | 1 | 12 | 7 |
| 247 | presurvey_arm_1 | 2 | 242 | 4 | 1 | 12 | 7 |
| 248 | presurvey_arm_1 | 2 | 242 | 4 | 1 | 12 | 7 |
| 249 | presurvey_arm_1 | 2 | 242 | 4 | 1 | 12 | 7 |
| 250 | presurvey_arm_1 | 2 | 242 | 4 | 1 | 13 | 7 |
| 251 | presurvey_arm_1 | 2 | 242 | 4 | 1 | 12 | 7 |
| 252 | presurvey_arm_1 | 2 | 242 | 4 | 1 | 12 | 7 |
| 253 | presurvey_arm_1 | 2 | 242 | 4 | 1 | 12 | 7 |

|     |                 |   |     |   |   |    |   |
|-----|-----------------|---|-----|---|---|----|---|
| 254 | presurvey_arm_1 | 2 | 242 | 4 | 1 | 12 | 7 |
| 255 | presurvey_arm_1 | 2 | 242 | 3 | 1 | 13 | 7 |
| 256 | presurvey_arm_1 | 2 | 242 | 4 | 1 | 13 | 7 |
| 257 | presurvey_arm_1 | 2 | 242 | 4 | 1 | 13 | 7 |
| 258 | presurvey_arm_1 | 2 | 242 | 4 | 1 | 13 | 7 |
| 259 | presurvey_arm_1 | 2 | 242 | 4 | 1 | 13 | 7 |
| 260 | presurvey_arm_1 | 2 | 242 | 4 | 1 | 13 | 7 |
| 261 | presurvey_arm_1 | 2 | 242 | 4 | 1 | 12 | 7 |
| 262 | presurvey_arm_1 | 2 | 242 | 4 | 1 | 12 | 7 |
| 263 | presurvey_arm_1 | 2 | 242 | 4 | 1 | 13 | 7 |
| 264 | presurvey_arm_1 | 2 | 242 | 4 | 1 | 12 | 7 |
| 265 | presurvey_arm_1 | 2 | 242 | 4 | 1 | 12 | 7 |
| 266 | presurvey_arm_1 | 2 | 242 | 4 | 1 | 12 | 7 |
| 267 | presurvey_arm_1 | 1 | 239 | 4 | 1 | 11 | 6 |
| 268 | presurvey_arm_1 | 1 | 239 | 4 | 1 | 11 | 6 |
| 269 | presurvey_arm_1 | 1 | 239 | 4 | 1 | 12 | 6 |
| 270 | presurvey_arm_1 | 1 | 239 | 4 | 1 | 11 | 6 |
| 271 | presurvey_arm_1 | 1 | 239 | 4 | 1 | 12 | 6 |
| 272 | presurvey_arm_1 | 1 | 239 | 4 | 1 | 12 | 6 |
| 273 | presurvey_arm_1 | 1 | 239 | 4 | 1 | 11 | 6 |
| 274 | presurvey_arm_1 | 1 | 239 | 4 | 1 | 11 | 6 |
| 275 | presurvey_arm_1 | 1 | 239 | 4 | 1 | 11 | 6 |
| 276 | presurvey_arm_1 | 1 | 239 | 4 | 1 | 11 | 6 |
| 277 | presurvey_arm_1 | 1 | 239 | 4 | 1 | 11 | 6 |
| 278 | presurvey_arm_1 | 1 | 239 | 4 | 1 | 11 | 6 |
| 279 | presurvey_arm_1 | 1 | 239 | 4 | 1 | 11 | 6 |
| 280 | presurvey_arm_1 | 1 | 239 | 4 | 1 | 11 | 6 |
| 281 | presurvey_arm_1 | 1 | 239 | 4 | 1 | 12 | 6 |
| 282 | presurvey_arm_1 | 1 | 239 | 4 | 1 | 12 | 6 |
| 283 | presurvey_arm_1 | 1 | 239 | 4 | 1 | 11 | 6 |
| 284 | presurvey_arm_1 | 1 | 239 | 4 | 1 | 11 | 6 |
| 285 | presurvey_arm_1 | 1 | 239 | 4 | 1 | 11 | 6 |
| 286 | presurvey_arm_1 | 1 | 239 | 4 | 1 | 11 | 6 |
| 287 | presurvey_arm_1 | 1 | 240 | 4 | 1 | 99 | 6 |
| 288 | presurvey_arm_1 | 1 | 240 | 4 | 1 | 11 | 6 |
| 289 | presurvey_arm_1 | 1 | 240 | 4 | 1 | 12 | 6 |
| 290 | presurvey_arm_1 | 1 | 240 | 4 | 1 | 11 | 6 |
| 291 | presurvey_arm_1 | 1 | 240 | 4 | 1 | 11 | 6 |
| 292 | presurvey_arm_1 | 1 | 240 | 4 | 1 | 12 | 6 |
| 293 | presurvey_arm_1 | 1 | 240 | 4 | 1 | 12 | 6 |
| 294 | presurvey_arm_1 | 1 | 240 | 3 | 1 | 11 | 6 |
| 295 | presurvey_arm_1 | 1 | 240 | 4 | 1 | 11 | 6 |
| 296 | presurvey_arm_1 | 1 | 240 | 4 | 1 | 12 | 6 |
| 297 | presurvey_arm_1 | 1 | 240 | 4 | 1 | 11 | 6 |
| 298 | presurvey_arm_1 | 1 | 240 | 4 | 1 | 11 | 6 |
| 299 | presurvey_arm_1 | 1 | 240 | 4 | 1 | 11 | 6 |
| 300 | presurvey_arm_1 | 1 | 240 | 4 | 1 | 11 | 6 |
| 301 | presurvey_arm_1 | 1 | 240 | 4 | 1 | 11 | 6 |

|     |                 |   |     |   |   |    |    |
|-----|-----------------|---|-----|---|---|----|----|
| 302 | presurvey_arm_1 | 1 | 240 | 4 | 1 | 11 | 6  |
| 303 | presurvey_arm_1 | 1 | 240 | 4 | 1 | 11 | 6  |
| 304 | presurvey_arm_1 | 1 | 240 | 3 | 1 | 11 | 6  |
| 305 | presurvey_arm_1 | 1 | 240 | 4 | 1 | 12 | 6  |
| 306 | presurvey_arm_1 | 1 | 240 | 3 | 1 | 11 | 6  |
| 307 | presurvey_arm_1 | 3 | 243 | 4 | 1 | 13 | 8  |
| 308 | presurvey_arm_1 | 3 | 243 | 4 | 1 | 14 | 8  |
| 309 | presurvey_arm_1 | 3 | 243 | 4 | 1 | 13 | 8  |
| 310 | presurvey_arm_1 | 3 | 243 | 4 | 1 | 14 | 8  |
| 311 | presurvey_arm_1 | 3 | 243 | 4 | 1 | 13 | 8  |
| 312 | presurvey_arm_1 | 3 | 243 | 4 | 1 | 13 | 8  |
| 313 | presurvey_arm_1 | 3 | 243 | 4 | 1 | 14 | 8  |
| 314 | presurvey_arm_1 | 3 | 243 | 4 | 1 | 13 | 8  |
| 315 | presurvey_arm_1 | 3 | 243 | 4 | 1 | 13 | 8  |
| 316 | presurvey_arm_1 | 3 | 243 | 4 | 1 | 13 | 8  |
| 317 | presurvey_arm_1 | 3 | 243 | 4 | 1 | 14 | 8  |
| 318 | presurvey_arm_1 | 3 | 243 | 4 | 1 | 13 | 8  |
| 319 | presurvey_arm_1 | 3 | 243 | 4 | 1 | 13 | 8  |
| 320 | presurvey_arm_1 | 3 | 243 | 4 | 1 | 13 | 8  |
| 321 | presurvey_arm_1 | 3 | 243 | 4 | 1 | 13 | 8  |
| 322 | presurvey_arm_1 | 3 | 243 | 4 | 1 | 14 | 8  |
| 323 | presurvey_arm_1 | 3 | 243 | 4 | 1 | 15 | 8  |
| 324 | presurvey_arm_1 | 3 | 243 | 4 | 1 | 13 | 8  |
| 325 | presurvey_arm_1 | 3 | 243 | 4 | 1 | 13 | 8  |
| 326 | presurvey_arm_1 | 3 | 243 | 4 | 1 | 13 | 8  |
| 327 | presurvey_arm_1 | 3 | 244 | 4 | 1 | 14 | 8  |
| 328 | presurvey_arm_1 | 3 | 244 | 4 | 1 | 13 | 8  |
| 329 | presurvey_arm_1 | 3 | 244 | 4 | 1 | 13 | 8  |
| 330 | presurvey_arm_1 | 3 | 244 | 3 | 1 | 13 | 8  |
| 331 | presurvey_arm_1 | 3 | 244 | 4 | 1 | 13 | 8  |
| 332 | presurvey_arm_1 | 3 | 244 | 3 | 1 | 13 | 8  |
| 333 | presurvey_arm_1 | 3 | 244 | 4 | 1 | 13 | 8  |
| 334 | presurvey_arm_1 | 3 | 244 | 4 | 1 | 13 | 8  |
| 335 | presurvey_arm_1 | 3 | 244 | 4 | 1 | 14 | 8  |
| 336 | presurvey_arm_1 | 3 | 244 | 4 | 1 | 13 | 8  |
| 337 | presurvey_arm_1 | 3 | 244 | 4 | 1 | 13 | 8  |
| 338 | presurvey_arm_1 | 3 | 244 | 4 | 1 | 13 | 8  |
| 339 | presurvey_arm_1 | 3 | 244 | 4 | 1 | 13 | 8  |
| 340 | presurvey_arm_1 | 3 | 244 | 4 | 1 | 13 | 8  |
| 341 | presurvey_arm_1 | 3 | 244 | 4 | 1 | 14 | 8  |
| 342 | presurvey_arm_1 | 3 | 244 | 4 | 1 | 14 | 99 |
| 343 | presurvey_arm_1 | 3 | 244 | 4 | 1 | 13 | 8  |
| 344 | presurvey_arm_1 | 3 | 244 | 4 | 1 | 13 | 8  |
| 363 | presurvey_arm_1 | 1 | 246 | 4 | 1 | 12 | 6  |
| 364 | presurvey_arm_1 | 1 | 246 | 4 | 1 | 12 | 6  |
| 365 | presurvey_arm_1 | 1 | 246 | 4 | 1 | 11 | 6  |
| 366 | presurvey_arm_1 | 1 | 246 | 4 | 1 | 12 | 6  |
| 367 | presurvey_arm_1 | 1 | 246 | 3 | 1 | 11 | 6  |

|     |                 |   |     |   |   |    |   |
|-----|-----------------|---|-----|---|---|----|---|
| 368 | presurvey_arm_1 | 1 | 246 | 4 | 1 | 12 | 6 |
| 369 | presurvey_arm_1 | 1 | 246 | 4 | 1 | 11 | 6 |
| 370 | presurvey_arm_1 | 1 | 246 | 4 | 1 | 11 | 6 |
| 371 | presurvey_arm_1 | 1 | 246 | 4 | 1 | 12 | 6 |
| 372 | presurvey_arm_1 | 1 | 246 | 4 | 1 | 12 | 6 |
| 373 | presurvey_arm_1 | 1 | 246 | 4 | 1 | 11 | 6 |
| 374 | presurvey_arm_1 | 1 | 246 | 4 | 1 | 11 | 6 |
| 375 | presurvey_arm_1 | 1 | 246 | 4 | 1 | 12 | 6 |
| 376 | presurvey_arm_1 | 1 | 246 | 4 | 1 | 11 | 6 |
| 377 | presurvey_arm_1 | 1 | 246 | 4 | 1 | 13 | 6 |
| 378 | presurvey_arm_1 | 1 | 246 | 4 | 1 | 12 | 6 |
| 379 | presurvey_arm_1 | 1 | 246 | 4 | 1 | 12 | 6 |
| 380 | presurvey_arm_1 | 1 | 246 | 4 | 1 | 12 | 6 |
| 381 | presurvey_arm_1 | 1 | 246 | 4 | 1 | 12 | 6 |
| 382 | presurvey_arm_1 | 1 | 246 | 4 | 1 | 11 | 6 |
| 383 | presurvey_arm_1 | 1 | 246 | 4 | 1 | 12 | 6 |
| 384 | presurvey_arm_1 | 1 | 246 | 4 | 1 | 11 | 6 |
| 385 | presurvey_arm_1 | 1 | 246 | 4 | 1 | 11 | 6 |
| 386 | presurvey_arm_1 | 1 | 247 | 4 | 1 | 12 | 6 |
| 387 | presurvey_arm_1 | 1 | 247 | 4 | 1 | 12 | 6 |
| 388 | presurvey_arm_1 | 1 | 247 | 4 | 1 | 11 | 6 |
| 389 | presurvey_arm_1 | 1 | 247 | 4 | 1 | 11 | 6 |
| 390 | presurvey_arm_1 | 1 | 247 | 4 | 1 | 11 | 6 |
| 391 | presurvey_arm_1 | 1 | 247 | 4 | 1 | 12 | 6 |
| 392 | presurvey_arm_1 | 1 | 247 | 4 | 1 | 11 | 6 |
| 393 | presurvey_arm_1 | 1 | 247 | 4 | 1 | 11 | 6 |
| 394 | presurvey_arm_1 | 1 | 247 | 4 | 1 | 11 | 6 |
| 395 | presurvey_arm_1 | 1 | 247 | 4 | 1 | 11 | 6 |
| 396 | presurvey_arm_1 | 1 | 247 | 4 | 1 | 12 | 6 |
| 397 | presurvey_arm_1 | 1 | 247 | 4 | 1 | 11 | 6 |
| 398 | presurvey_arm_1 | 1 | 247 | 4 | 1 | 11 | 6 |
| 399 | presurvey_arm_1 | 1 | 247 | 4 | 1 | 11 | 6 |
| 400 | presurvey_arm_1 | 1 | 247 | 4 | 1 | 11 | 6 |
| 401 | presurvey_arm_1 | 1 | 247 | 4 | 1 | 11 | 6 |
| 402 | presurvey_arm_1 | 1 | 247 | 4 | 1 | 12 | 6 |
| 403 | presurvey_arm_1 | 2 | 248 | 4 | 1 | 13 | 7 |
| 404 | presurvey_arm_1 | 2 | 248 | 4 | 1 | 12 | 7 |
| 405 | presurvey_arm_1 | 2 | 248 | 4 | 1 | 12 | 7 |
| 406 | presurvey_arm_1 | 2 | 248 | 4 | 1 | 12 | 7 |
| 407 | presurvey_arm_1 | 2 | 248 | 4 | 1 | 13 | 7 |
| 408 | presurvey_arm_1 | 2 | 248 | 4 | 1 | 12 | 7 |
| 409 | presurvey_arm_1 | 2 | 248 | 4 | 1 | 12 | 7 |
| 410 | presurvey_arm_1 | 2 | 248 | 4 | 1 | 12 | 7 |
| 411 | presurvey_arm_1 | 2 | 248 | 4 | 1 | 12 | 7 |
| 412 | presurvey_arm_1 | 2 | 248 | 4 | 1 | 13 | 7 |
| 413 | presurvey_arm_1 | 2 | 248 | 4 | 1 | 12 | 7 |
| 414 | presurvey_arm_1 | 2 | 248 | 4 | 1 | 12 | 7 |
| 415 | presurvey_arm_1 | 2 | 248 | 4 | 1 | 13 | 7 |

|     |                 |   |     |   |   |    |   |
|-----|-----------------|---|-----|---|---|----|---|
| 416 | presurvey_arm_1 | 2 | 248 | 4 | 1 | 12 | 7 |
| 417 | presurvey_arm_1 | 2 | 248 | 4 | 1 | 12 | 7 |
| 418 | presurvey_arm_1 | 2 | 248 | 4 | 1 | 13 | 7 |
| 419 | presurvey_arm_1 | 2 | 248 | 4 | 1 | 12 | 7 |
| 420 | presurvey_arm_1 | 2 | 248 | 4 | 1 | 13 | 7 |
| 421 | presurvey_arm_1 | 2 | 248 | 4 | 1 | 12 | 7 |
| 422 | presurvey_arm_1 | 2 | 248 | 4 | 1 | 13 | 7 |
| 423 | presurvey_arm_1 | 2 | 248 | 4 | 1 | 12 | 7 |
| 424 | presurvey_arm_1 | 2 | 248 | 4 | 1 | 13 | 7 |
| 425 | presurvey_arm_1 | 2 | 248 | 4 | 1 | 13 | 7 |
| 426 | presurvey_arm_1 | 2 | 248 | 4 | 1 | 12 | 7 |
| 427 | presurvey_arm_1 | 2 | 249 | 4 | 1 | 12 | 7 |
| 428 | presurvey_arm_1 | 2 | 249 | 4 | 1 | 12 | 7 |
| 429 | presurvey_arm_1 | 2 | 249 | 4 | 1 | 12 | 7 |
| 430 | presurvey_arm_1 | 2 | 249 | 4 | 1 | 13 | 7 |
| 431 | presurvey_arm_1 | 2 | 249 | 4 | 1 | 12 | 7 |
| 432 | presurvey_arm_1 | 2 | 249 | 4 | 1 | 11 | 7 |
| 433 | presurvey_arm_1 | 2 | 249 | 4 | 1 | 13 | 7 |
| 434 | presurvey_arm_1 | 2 | 249 | 4 | 1 | 12 | 7 |
| 435 | presurvey_arm_1 | 2 | 249 | 4 | 1 | 12 | 7 |
| 436 | presurvey_arm_1 | 2 | 249 | 4 | 1 | 12 | 7 |
| 437 | presurvey_arm_1 | 2 | 249 | 4 | 1 | 13 | 7 |
| 438 | presurvey_arm_1 | 2 | 249 | 4 | 1 | 13 | 7 |
| 439 | presurvey_arm_1 | 2 | 249 | 4 | 1 | 13 | 7 |
| 440 | presurvey_arm_1 | 2 | 249 | 4 | 1 | 13 | 7 |
| 441 | presurvey_arm_1 | 2 | 249 | 4 | 1 | 12 | 7 |
| 442 | presurvey_arm_1 | 2 | 249 | 4 | 1 | 13 | 7 |
| 443 | presurvey_arm_1 | 2 | 249 | 4 | 1 | 12 | 7 |
| 444 | presurvey_arm_1 | 2 | 249 | 4 | 1 | 13 | 7 |
| 445 | presurvey_arm_1 | 2 | 249 | 4 | 1 | 12 | 7 |
| 446 | presurvey_arm_1 | 2 | 249 | 4 | 1 | 12 | 7 |
| 447 | presurvey_arm_1 | 2 | 249 | 4 | 1 | 13 | 7 |
| 448 | presurvey_arm_1 | 2 | 249 | 4 | 1 | 14 | 7 |
| 449 | presurvey_arm_1 | 3 | 250 | 4 | 1 | 13 | 8 |
| 450 | presurvey_arm_1 | 3 | 250 | 4 | 1 | 11 | 8 |
| 451 | presurvey_arm_1 | 3 | 250 | 4 | 1 | 14 | 8 |
| 452 | presurvey_arm_1 | 3 | 250 | 4 | 1 | 13 | 8 |
| 453 | presurvey_arm_1 | 3 | 250 | 4 | 1 | 13 | 8 |
| 454 | presurvey_arm_1 | 3 | 250 | 4 | 1 | 13 | 8 |
| 455 | presurvey_arm_1 | 3 | 250 | 4 | 1 | 13 | 8 |
| 456 | presurvey_arm_1 | 3 | 250 | 4 | 1 | 14 | 8 |
| 457 | presurvey_arm_1 | 3 | 250 | 4 | 1 | 14 | 8 |
| 458 | presurvey_arm_1 | 3 | 250 | 4 | 1 | 14 | 8 |
| 459 | presurvey_arm_1 | 3 | 250 | 4 | 1 | 14 | 8 |
| 460 | presurvey_arm_1 | 3 | 250 | 4 | 1 | 13 | 8 |
| 461 | presurvey_arm_1 | 3 | 250 | 4 | 1 | 13 | 8 |
| 462 | presurvey_arm_1 | 3 | 250 | 4 | 1 | 13 | 8 |
| 463 | presurvey_arm_1 | 3 | 250 | 4 | 1 | 13 | 8 |

|     |                 |   |     |   |   |    |    |
|-----|-----------------|---|-----|---|---|----|----|
| 464 | presurvey_arm_1 | 3 | 250 | 4 | 1 | 13 | 8  |
| 465 | presurvey_arm_1 | 3 | 250 | 4 | 1 | 13 | 8  |
| 466 | presurvey_arm_1 | 3 | 250 | 4 | 1 | 13 | 8  |
| 467 | presurvey_arm_1 | 3 | 250 | 4 | 1 | 14 | 8  |
| 468 | presurvey_arm_1 | 3 | 250 | 4 | 1 | 13 | 8  |
| 469 | presurvey_arm_1 | 3 | 250 | 4 | 1 | 14 | 8  |
| 470 | presurvey_arm_1 | 3 | 251 | 4 | 1 | 13 | 8  |
| 471 | presurvey_arm_1 | 3 | 251 | 4 | 1 | 13 | 8  |
| 472 | presurvey_arm_1 | 3 | 251 | 4 | 1 | 14 | 8  |
| 473 | presurvey_arm_1 | 3 | 251 | 4 | 1 | 13 | 8  |
| 474 | presurvey_arm_1 | 3 | 251 | 4 | 1 | 14 | 8  |
| 475 | presurvey_arm_1 | 3 | 251 | 4 | 1 | 13 | 8  |
| 476 | presurvey_arm_1 | 3 | 251 | 4 | 1 | 13 | 8  |
| 477 | presurvey_arm_1 | 3 | 251 | 4 | 1 | 14 | 8  |
| 478 | presurvey_arm_1 | 3 | 251 | 4 | 1 | 14 | 8  |
| 479 | presurvey_arm_1 | 3 | 251 | 4 | 1 | 13 | 8  |
| 480 | presurvey_arm_1 | 3 | 251 | 4 | 1 | 14 | 8  |
| 481 | presurvey_arm_1 | 3 | 251 | 4 | 1 | 13 | 8  |
| 482 | presurvey_arm_1 | 3 | 251 | 4 | 1 | 13 | 8  |
| 483 | presurvey_arm_1 | 3 | 251 | 4 | 1 | 13 | 8  |
| 484 | presurvey_arm_1 | 3 | 251 | 4 | 1 | 13 | 8  |
| 485 | presurvey_arm_1 | 3 | 251 | 4 | 1 | 13 | 8  |
| 486 | presurvey_arm_1 | 3 | 251 | 4 | 1 | 13 | 99 |
| 711 | presurvey_arm_1 | 1 | 254 | 4 | 1 | 11 | 6  |
| 712 | presurvey_arm_1 | 1 | 254 | 4 | 1 | 12 | 6  |
| 713 | presurvey_arm_1 | 1 | 254 | 4 | 1 | 12 | 6  |
| 714 | presurvey_arm_1 | 1 | 254 | 4 | 1 | 12 | 6  |
| 715 | presurvey_arm_1 | 1 | 254 | 4 | 1 | 11 | 6  |
| 716 | presurvey_arm_1 | 1 | 254 | 4 | 1 | 11 | 6  |
| 717 | presurvey_arm_1 | 1 | 254 | 4 | 1 | 12 | 6  |
| 718 | presurvey_arm_1 | 1 | 254 | 4 | 1 | 11 | 6  |
| 719 | presurvey_arm_1 | 1 | 254 | 4 | 1 | 13 | 6  |
| 720 | presurvey_arm_1 | 1 | 254 | 4 | 1 | 11 | 6  |
| 721 | presurvey_arm_1 | 1 | 254 | 4 | 1 | 11 | 6  |
| 722 | presurvey_arm_1 | 1 | 254 | 4 | 1 | 11 | 6  |
| 723 | presurvey_arm_1 | 1 | 254 | 4 | 1 | 12 | 6  |
| 724 | presurvey_arm_1 | 1 | 254 | 4 | 1 | 11 | 6  |
| 725 | presurvey_arm_1 | 1 | 254 | 4 | 1 | 12 | 6  |
| 726 | presurvey_arm_1 | 1 | 254 | 4 | 1 | 11 | 6  |
| 727 | presurvey_arm_1 | 1 | 254 | 4 | 1 | 12 | 6  |
| 728 | presurvey_arm_1 | 1 | 254 | 4 | 1 | 12 | 6  |
| 729 | presurvey_arm_1 | 1 | 254 | 4 | 1 | 12 | 6  |
| 730 | presurvey_arm_1 | 1 | 254 | 4 | 1 | 11 | 6  |
| 731 | presurvey_arm_1 | 1 | 254 | 4 | 1 | 11 | 6  |
| 732 | presurvey_arm_1 | 1 | 254 | 4 | 1 | 12 | 6  |
| 733 | presurvey_arm_1 | 1 | 255 | 4 | 1 | 12 | 6  |
| 734 | presurvey_arm_1 | 1 | 255 | 4 | 1 | 12 | 6  |
| 735 | presurvey_arm_1 | 1 | 255 | 4 | 1 | 11 | 6  |



|     |                 |   |     |   |   |    |   |
|-----|-----------------|---|-----|---|---|----|---|
| 736 | presurvey_arm_1 | 1 | 255 | 4 | 1 | 11 | 6 |
| 737 | presurvey_arm_1 | 1 | 255 | 4 | 1 | 11 | 6 |
| 738 | presurvey_arm_1 | 1 | 255 | 4 | 1 | 12 | 6 |
| 739 | presurvey_arm_1 | 1 | 255 | 4 | 1 | 11 | 6 |
| 740 | presurvey_arm_1 | 1 | 255 | 4 | 1 | 12 | 6 |
| 741 | presurvey_arm_1 | 1 | 255 | 4 | 1 | 12 | 6 |
| 742 | presurvey_arm_1 | 1 | 255 | 4 | 1 | 11 | 6 |
| 743 | presurvey_arm_1 | 1 | 255 | 4 | 1 | 12 | 6 |
| 744 | presurvey_arm_1 | 1 | 255 | 4 | 1 | 11 | 6 |
| 745 | presurvey_arm_1 | 1 | 255 | 4 | 1 | 12 | 6 |
| 746 | presurvey_arm_1 | 1 | 255 | 4 | 1 | 12 | 6 |
| 747 | presurvey_arm_1 | 1 | 255 | 4 | 1 | 12 | 6 |
| 748 | presurvey_arm_1 | 1 | 255 | 4 | 1 | 11 | 6 |
| 749 | presurvey_arm_1 | 1 | 255 | 4 | 1 | 11 | 6 |
| 750 | presurvey_arm_1 | 1 | 255 | 4 | 1 | 11 | 6 |
| 751 | presurvey_arm_1 | 2 | 256 | 4 | 1 | 13 | 7 |
| 752 | presurvey_arm_1 | 2 | 256 | 4 | 1 | 13 | 7 |
| 753 | presurvey_arm_1 | 2 | 256 | 4 | 1 | 12 | 7 |
| 754 | presurvey_arm_1 | 2 | 256 | 4 | 1 | 13 | 7 |
| 755 | presurvey_arm_1 | 2 | 256 | 4 | 1 | 12 | 7 |
| 756 | presurvey_arm_1 | 2 | 256 | 4 | 1 | 13 | 7 |
| 757 | presurvey_arm_1 | 2 | 256 | 4 | 1 | 12 | 7 |
| 758 | presurvey_arm_1 | 2 | 256 | 4 | 1 | 12 | 7 |
| 759 | presurvey_arm_1 | 2 | 256 | 4 | 1 | 13 | 7 |
| 760 | presurvey_arm_1 | 2 | 256 | 4 | 1 | 12 | 7 |
| 761 | presurvey_arm_1 | 2 | 256 | 4 | 1 | 12 | 7 |
| 762 | presurvey_arm_1 | 2 | 256 | 4 | 1 | 12 | 7 |
| 763 | presurvey_arm_1 | 2 | 256 | 4 | 1 | 12 | 7 |
| 764 | presurvey_arm_1 | 2 | 256 | 4 | 1 | 13 | 7 |
| 765 | presurvey_arm_1 | 2 | 256 | 4 | 1 | 12 | 7 |
| 766 | presurvey_arm_1 | 2 | 256 | 4 | 1 | 13 | 7 |
| 767 | presurvey_arm_1 | 2 | 256 | 4 | 1 | 13 | 7 |
| 768 | presurvey_arm_1 | 2 | 256 | 4 | 1 | 12 | 7 |
| 769 | presurvey_arm_1 | 2 | 256 | 4 | 1 | 13 | 7 |
| 770 | presurvey_arm_1 | 2 | 256 | 4 | 1 | 12 | 7 |
| 771 | presurvey_arm_1 | 2 | 257 | 4 | 1 | 13 | 7 |
| 772 | presurvey_arm_1 | 2 | 257 | 4 | 1 | 12 | 7 |
| 773 | presurvey_arm_1 | 2 | 257 | 4 | 1 | 12 | 7 |
| 774 | presurvey_arm_1 | 2 | 257 | 4 | 1 | 13 | 7 |
| 775 | presurvey_arm_1 | 2 | 257 | 4 | 1 | 12 | 7 |
| 776 | presurvey_arm_1 | 2 | 257 | 4 | 1 | 13 | 7 |
| 777 | presurvey_arm_1 | 2 | 257 | 4 | 1 | 13 | 7 |
| 778 | presurvey_arm_1 | 2 | 257 | 4 | 1 | 12 | 7 |
| 779 | presurvey_arm_1 | 2 | 257 | 4 | 1 | 13 | 7 |
| 780 | presurvey_arm_1 | 2 | 257 | 4 | 1 | 13 | 7 |
| 781 | presurvey_arm_1 | 2 | 257 | 4 | 1 | 13 | 7 |
| 782 | presurvey_arm_1 | 2 | 257 | 4 | 1 | 13 | 7 |
| 783 | presurvey_arm_1 | 2 | 257 | 4 | 1 | 13 | 7 |

|     |                 |   |     |   |   |    |   |
|-----|-----------------|---|-----|---|---|----|---|
| 784 | presurvey_arm_1 | 2 | 257 | 4 | 1 | 13 | 7 |
| 785 | presurvey_arm_1 | 2 | 257 | 4 | 1 | 12 | 7 |
| 786 | presurvey_arm_1 | 2 | 257 | 4 | 1 | 12 | 7 |
| 787 | presurvey_arm_1 | 2 | 257 | 4 | 1 | 12 | 7 |
| 788 | presurvey_arm_1 | 3 | 258 | 4 | 1 | 13 | 8 |
| 789 | presurvey_arm_1 | 3 | 258 | 4 | 1 | 13 | 8 |
| 790 | presurvey_arm_1 | 3 | 258 | 4 | 1 | 14 | 8 |
| 791 | presurvey_arm_1 | 3 | 258 | 4 | 1 | 13 | 8 |
| 792 | presurvey_arm_1 | 3 | 258 | 4 | 1 | 14 | 8 |
| 793 | presurvey_arm_1 | 3 | 258 | 4 | 1 | 14 | 8 |
| 794 | presurvey_arm_1 | 3 | 258 | 4 | 1 | 14 | 8 |
| 795 | presurvey_arm_1 | 3 | 258 | 4 | 1 | 14 | 8 |
| 796 | presurvey_arm_1 | 3 | 258 | 4 | 1 | 13 | 8 |
| 797 | presurvey_arm_1 | 3 | 258 | 4 | 1 | 14 | 8 |
| 798 | presurvey_arm_1 | 3 | 258 | 4 | 1 | 14 | 8 |
| 799 | presurvey_arm_1 | 3 | 258 | 4 | 1 | 13 | 8 |
| 800 | presurvey_arm_1 | 3 | 258 | 4 | 1 | 14 | 8 |
| 801 | presurvey_arm_1 | 3 | 258 | 4 | 1 | 14 | 8 |
| 802 | presurvey_arm_1 | 3 | 258 | 4 | 1 | 14 | 8 |
| 803 | presurvey_arm_1 | 3 | 258 | 4 | 1 | 13 | 8 |
| 804 | presurvey_arm_1 | 3 | 258 | 4 | 1 | 14 | 8 |
| 805 | presurvey_arm_1 | 3 | 258 | 4 | 1 | 14 | 8 |
| 806 | presurvey_arm_1 | 3 | 259 | 4 | 1 | 14 | 8 |
| 807 | presurvey_arm_1 | 3 | 259 | 4 | 1 | 13 | 8 |
| 808 | presurvey_arm_1 | 3 | 259 | 4 | 1 | 14 | 8 |
| 809 | presurvey_arm_1 | 3 | 259 | 4 | 1 | 14 | 8 |
| 810 | presurvey_arm_1 | 3 | 259 | 4 | 1 | 13 | 8 |
| 811 | presurvey_arm_1 | 3 | 259 | 4 | 1 | 13 | 8 |
| 812 | presurvey_arm_1 | 3 | 259 | 4 | 1 | 13 | 8 |
| 813 | presurvey_arm_1 | 3 | 259 | 4 | 1 | 13 | 8 |
| 814 | presurvey_arm_1 | 3 | 259 | 4 | 1 | 13 | 8 |
| 815 | presurvey_arm_1 | 3 | 259 | 4 | 1 | 14 | 8 |
| 816 | presurvey_arm_1 | 3 | 259 | 4 | 1 | 13 | 8 |
| 817 | presurvey_arm_1 | 3 | 259 | 4 | 1 | 14 | 8 |
| 818 | presurvey_arm_1 | 3 | 259 | 4 | 1 | 14 | 8 |
| 819 | presurvey_arm_1 | 3 | 259 | 4 | 1 | 13 | 8 |
| 820 | presurvey_arm_1 | 3 | 259 | 4 | 1 | 13 | 8 |
| 821 | presurvey_arm_1 | 3 | 259 | 4 | 1 | 13 | 8 |
| 822 | presurvey_arm_1 | 3 | 259 | 4 | 1 | 14 | 8 |
| 823 | presurvey_arm_1 | 3 | 259 | 4 | 1 | 13 | 8 |
| 824 | presurvey_arm_1 | 3 | 259 | 4 | 1 | 14 | 8 |
| 825 | presurvey_arm_1 | 3 | 259 | 4 | 1 | 13 | 8 |
| 938 | presurvey_arm_1 | 1 | 263 | 4 | 1 | 12 | 6 |
| 939 | presurvey_arm_1 | 1 | 263 | 4 | 1 | 11 | 6 |
| 940 | presurvey_arm_1 | 1 | 263 | 4 | 1 | 12 | 6 |
| 941 | presurvey_arm_1 | 1 | 263 | 5 | 1 | 12 | 6 |
| 942 | presurvey_arm_1 | 1 | 263 | 4 | 1 | 11 | 6 |
| 943 | presurvey_arm_1 | 1 | 263 | 4 | 1 | 11 | 6 |

|     |                 |   |     |   |   |    |   |
|-----|-----------------|---|-----|---|---|----|---|
| 944 | presurvey_arm_1 | 1 | 263 | 4 | 1 | 11 | 6 |
| 945 | presurvey_arm_1 | 1 | 263 | 4 | 1 | 12 | 6 |
| 946 | presurvey_arm_1 | 1 | 263 | 4 | 1 | 12 | 6 |
| 947 | presurvey_arm_1 | 1 | 263 | 4 | 1 | 12 | 6 |
| 948 | presurvey_arm_1 | 1 | 263 | 4 | 1 | 11 | 6 |
| 949 | presurvey_arm_1 | 1 | 263 | 5 | 1 | 11 | 6 |
| 950 | presurvey_arm_1 | 1 | 263 | 4 | 1 | 11 | 6 |
| 951 | presurvey_arm_1 | 1 | 263 | 4 | 1 | 12 | 6 |
| 952 | presurvey_arm_1 | 1 | 263 | 4 | 1 | 13 | 6 |
| 953 | presurvey_arm_1 | 1 | 263 | 4 | 1 | 12 | 6 |
| 954 | presurvey_arm_1 | 1 | 263 | 4 | 1 | 12 | 6 |
| 955 | presurvey_arm_1 | 1 | 263 | 4 | 1 | 12 | 6 |
| 956 | presurvey_arm_1 | 1 | 263 | 4 | 1 | 11 | 6 |
| 957 | presurvey_arm_1 | 1 | 263 | 4 | 1 | 12 | 6 |
| 958 | presurvey_arm_1 | 1 | 263 | 4 | 1 | 12 | 6 |
| 959 | presurvey_arm_1 | 1 | 263 | 4 | 1 | 12 | 6 |
| 960 | presurvey_arm_1 | 1 | 264 | 4 | 1 | 11 | 6 |
| 961 | presurvey_arm_1 | 1 | 264 | 4 | 1 | 11 | 6 |
| 962 | presurvey_arm_1 | 1 | 264 | 4 | 1 | 12 | 6 |
| 963 | presurvey_arm_1 | 1 | 264 | 4 | 1 | 12 | 6 |
| 964 | presurvey_arm_1 | 1 | 264 | 5 | 1 | 12 | 6 |
| 965 | presurvey_arm_1 | 1 | 264 | 4 | 1 | 12 | 6 |
| 966 | presurvey_arm_1 | 1 | 264 | 5 | 1 | 11 | 6 |
| 967 | presurvey_arm_1 | 1 | 264 | 4 | 1 | 12 | 6 |
| 968 | presurvey_arm_1 | 1 | 264 | 4 | 1 | 11 | 6 |
| 969 | presurvey_arm_1 | 1 | 264 | 4 | 1 | 11 | 6 |
| 970 | presurvey_arm_1 | 1 | 264 | 4 | 1 | 12 | 6 |
| 971 | presurvey_arm_1 | 1 | 264 | 4 | 1 | 11 | 6 |
| 972 | presurvey_arm_1 | 1 | 264 | 4 | 1 | 12 | 6 |
| 973 | presurvey_arm_1 | 1 | 264 | 4 | 1 | 11 | 6 |
| 974 | presurvey_arm_1 | 1 | 264 | 5 | 1 | 12 | 6 |
| 975 | presurvey_arm_1 | 1 | 264 | 4 | 1 | 13 | 6 |
| 976 | presurvey_arm_1 | 1 | 264 | 5 | 1 | 12 | 6 |
| 977 | presurvey_arm_1 | 1 | 264 | 4 | 1 | 13 | 7 |
| 978 | presurvey_arm_1 | 1 | 264 | 4 | 1 | 13 | 7 |
| 979 | presurvey_arm_1 | 2 | 265 | 4 | 1 | 13 | 7 |
| 980 | presurvey_arm_1 | 2 | 265 | 4 | 1 | 13 | 7 |
| 981 | presurvey_arm_1 | 2 | 265 | 4 | 1 | 12 | 7 |
| 982 | presurvey_arm_1 | 2 | 265 | 4 | 1 | 13 | 7 |
| 983 | presurvey_arm_1 | 2 | 265 | 4 | 1 | 12 | 7 |
| 984 | presurvey_arm_1 | 2 | 265 | 4 | 1 | 12 | 7 |
| 985 | presurvey_arm_1 | 2 | 265 | 4 | 1 | 13 | 7 |
| 986 | presurvey_arm_1 | 2 | 265 | 4 | 1 | 12 | 7 |
| 987 | presurvey_arm_1 | 2 | 265 | 4 | 1 | 13 | 7 |
| 988 | presurvey_arm_1 | 2 | 265 | 4 | 1 | 12 | 7 |
| 989 | presurvey_arm_1 | 2 | 265 | 5 | 1 | 12 | 7 |
| 990 | presurvey_arm_1 | 2 | 265 | 5 | 1 | 13 | 7 |
| 991 | presurvey_arm_1 | 2 | 265 | 4 | 1 | 12 | 7 |

|      |                 |   |     |   |   |    |    |
|------|-----------------|---|-----|---|---|----|----|
| 992  | presurvey_arm_1 | 2 | 265 | 5 | 1 | 13 | 7  |
| 993  | presurvey_arm_1 | 2 | 265 | 4 | 1 | 12 | 7  |
| 994  | presurvey_arm_1 | 2 | 265 | 4 | 1 | 12 | 7  |
| 995  | presurvey_arm_1 | 2 | 265 | 4 | 1 | 12 | 7  |
| 996  | presurvey_arm_1 | 2 | 265 | 5 | 1 | 13 | 7  |
| 997  | presurvey_arm_1 | 2 | 265 | 4 | 1 | 13 | 7  |
| 998  | presurvey_arm_1 | 2 | 265 | 4 | 1 | 13 | 7  |
| 999  | presurvey_arm_1 | 2 | 265 | 4 | 1 | 12 | 7  |
| 1000 | presurvey_arm_1 | 2 | 265 | 4 | 1 | 13 | 7  |
| 1001 | presurvey_arm_1 | 2 | 266 | 4 | 1 | 12 | 7  |
| 1002 | presurvey_arm_1 | 2 | 266 | 5 | 1 | 12 | 7  |
| 1003 | presurvey_arm_1 | 2 | 266 | 4 | 1 | 12 | 7  |
| 1004 | presurvey_arm_1 | 2 | 266 | 4 | 1 | 13 | 7  |
| 1005 | presurvey_arm_1 | 2 | 266 | 4 | 1 | 14 | 7  |
| 1006 | presurvey_arm_1 | 2 | 266 | 4 | 1 | 13 | 7  |
| 1007 | presurvey_arm_1 | 2 | 266 | 4 | 1 | 12 | 7  |
| 1008 | presurvey_arm_1 | 2 | 266 | 4 | 1 | 13 | 7  |
| 1009 | presurvey_arm_1 | 2 | 266 | 4 | 1 | 13 | 7  |
| 1010 | presurvey_arm_1 | 2 | 266 | 4 | 1 | 12 | 7  |
| 1011 | presurvey_arm_1 | 2 | 266 | 4 | 1 | 13 | 7  |
| 1012 | presurvey_arm_1 | 2 | 266 | 4 | 1 | 13 | 7  |
| 1013 | presurvey_arm_1 | 2 | 266 | 4 | 1 | 13 | 7  |
| 1014 | presurvey_arm_1 | 2 | 266 | 4 | 1 | 12 | 7  |
| 1015 | presurvey_arm_1 | 2 | 266 | 4 | 1 | 13 | 7  |
| 1016 | presurvey_arm_1 | 2 | 266 | 4 | 1 | 13 | 7  |
| 1017 | presurvey_arm_1 | 2 | 266 | 5 | 1 | 12 | 7  |
| 1018 | presurvey_arm_1 | 2 | 266 | 4 | 1 | 13 | 7  |
| 1019 | presurvey_arm_1 | 2 | 266 | 5 | 1 | 13 | 7  |
| 1020 | presurvey_arm_1 | 2 | 266 | 4 | 1 | 13 | 7  |
| 1021 | presurvey_arm_1 | 2 | 266 | 4 | 1 | 12 | 7  |
| 1022 | presurvey_arm_1 | 3 | 267 | 4 | 1 | 13 | 8  |
| 1023 | presurvey_arm_1 | 3 | 267 | 4 | 1 | 13 | 8  |
| 1024 | presurvey_arm_1 | 3 | 267 | 5 | 1 | 14 | 99 |
| 1025 | presurvey_arm_1 | 3 | 267 | 4 | 1 | 13 | 8  |
| 1026 | presurvey_arm_1 | 3 | 267 | 4 | 1 | 14 | 8  |
| 1027 | presurvey_arm_1 | 3 | 267 | 4 | 1 | 13 | 8  |
| 1028 | presurvey_arm_1 | 3 | 267 | 4 | 1 | 13 | 8  |
| 1029 | presurvey_arm_1 | 3 | 267 | 4 | 1 | 14 | 8  |
| 1030 | presurvey_arm_1 | 3 | 267 | 4 | 1 | 13 | 8  |
| 1031 | presurvey_arm_1 | 3 | 267 | 4 | 1 | 14 | 8  |
| 1032 | presurvey_arm_1 | 3 | 267 | 4 | 1 | 14 | 8  |
| 1033 | presurvey_arm_1 | 3 | 267 | 4 | 1 | 14 | 8  |
| 1034 | presurvey_arm_1 | 3 | 267 | 4 | 1 | 14 | 8  |
| 1035 | presurvey_arm_1 | 3 | 267 | 5 | 1 | 15 | 8  |
| 1036 | presurvey_arm_1 | 3 | 267 | 4 | 1 | 14 | 8  |
| 1037 | presurvey_arm_1 | 3 | 267 | 4 | 1 | 13 | 8  |
| 1038 | presurvey_arm_1 | 3 | 267 | 4 | 1 | 13 | 8  |
| 1039 | presurvey_arm_1 | 3 | 268 | 4 | 1 | 13 | 8  |

|      |                 |   |     |   |   |    |    |
|------|-----------------|---|-----|---|---|----|----|
| 1040 | presurvey_arm_1 | 3 | 268 | 4 | 1 | 14 | 8  |
| 1041 | presurvey_arm_1 | 3 | 268 | 4 | 1 | 14 | 8  |
| 1042 | presurvey_arm_1 | 3 | 268 | 4 | 1 | 13 | 8  |
| 1043 | presurvey_arm_1 | 3 | 268 | 4 | 1 | 13 | 8  |
| 1044 | presurvey_arm_1 | 3 | 268 | 4 | 1 | 14 | 8  |
| 1045 | presurvey_arm_1 | 3 | 268 | 4 | 1 | 14 | 8  |
| 1046 | presurvey_arm_1 | 3 | 268 | 4 | 1 | 14 | 8  |
| 1047 | presurvey_arm_1 | 3 | 268 | 4 | 1 | 14 | 8  |
| 1048 | presurvey_arm_1 | 3 | 268 | 4 | 1 | 13 | 8  |
| 1049 | presurvey_arm_1 | 3 | 268 | 4 | 1 | 13 | 8  |
| 1050 | presurvey_arm_1 | 3 | 268 | 4 | 1 | 14 | 8  |
| 1051 | presurvey_arm_1 | 3 | 268 | 4 | 1 | 14 | 8  |
| 1052 | presurvey_arm_1 | 1 | 183 | 3 | 1 | 11 | 6  |
| 1053 | presurvey_arm_1 | 1 | 183 | 3 | 1 | 12 | 6  |
| 1054 | presurvey_arm_1 | 1 | 183 | 3 | 1 | 11 | 6  |
| 1055 | presurvey_arm_1 | 1 | 183 | 3 | 1 | 11 | 6  |
| 1056 | presurvey_arm_1 | 1 | 183 | 3 | 1 | 12 | 6  |
| 1057 | presurvey_arm_1 | 1 | 183 | 3 | 1 | 11 | 6  |
| 1058 | presurvey_arm_1 | 1 | 183 | 3 | 1 | 11 | 6  |
| 1059 | presurvey_arm_1 | 1 | 183 | 3 | 1 | 11 | 6  |
| 1060 | presurvey_arm_1 | 1 | 183 | 3 | 1 | 11 | 6  |
| 1061 | presurvey_arm_1 | 1 | 183 | 3 | 1 | 12 | 6  |
| 1062 | presurvey_arm_1 | 1 | 183 | 3 | 1 | 11 | 6  |
| 1063 | presurvey_arm_1 | 1 | 183 | 2 | 1 | 11 | 6  |
| 1064 | presurvey_arm_1 | 1 | 183 | 2 | 1 | 11 | 6  |
| 1065 | presurvey_arm_1 | 1 | 183 | 3 | 1 | 11 | 6  |
| 1066 | presurvey_arm_1 | 1 | 183 | 3 | 1 | 11 | 6  |
| 1067 | presurvey_arm_1 | 1 | 183 | 2 | 1 | 11 | 6  |
| 1068 | presurvey_arm_1 | 1 | 183 | 3 | 1 | 12 | 6  |
| 1069 | presurvey_arm_1 | 1 | 183 | 3 | 1 | 11 | 6  |
| 1070 | presurvey_arm_1 | 1 | 183 | 3 | 1 | 99 | 99 |
| 1071 | presurvey_arm_1 | 1 | 183 | 3 | 1 | 12 | 6  |
| 1072 | presurvey_arm_1 | 1 | 183 | 2 | 1 | 11 | 6  |
| 1073 | presurvey_arm_1 | 1 | 183 | 3 | 1 | 11 | 6  |
| 1074 | presurvey_arm_1 | 1 | 183 | 3 | 1 | 11 | 6  |
| 1075 | presurvey_arm_1 | 1 | 183 | 3 | 1 | 11 | 6  |
| 1076 | presurvey_arm_1 | 1 | 183 | 3 | 1 | 11 | 6  |
| 1077 | presurvey_arm_1 | 1 | 183 | 3 | 1 | 11 | 6  |
| 1078 | presurvey_arm_1 | 1 | 184 | 3 | 1 | 11 | 6  |
| 1079 | presurvey_arm_1 | 1 | 184 | 3 | 1 | 11 | 6  |
| 1080 | presurvey_arm_1 | 1 | 184 | 3 | 1 | 11 | 6  |
| 1081 | presurvey_arm_1 | 1 | 184 | 3 | 1 | 11 | 6  |
| 1082 | presurvey_arm_1 | 1 | 184 | 2 | 1 | 11 | 6  |
| 1083 | presurvey_arm_1 | 1 | 184 | 3 | 1 | 10 | 6  |
| 1084 | presurvey_arm_1 | 1 | 184 | 3 | 1 | 11 | 6  |
| 1085 | presurvey_arm_1 | 1 | 184 | 3 | 1 | 11 | 6  |
| 1086 | presurvey_arm_1 | 1 | 184 | 3 | 1 | 11 | 6  |
| 1087 | presurvey_arm_1 | 1 | 184 | 3 | 1 | 11 | 6  |

|      |                 |   |     |   |   |    |   |
|------|-----------------|---|-----|---|---|----|---|
| 1088 | presurvey_arm_1 | 1 | 184 | 3 | 1 | 11 | 6 |
| 1089 | presurvey_arm_1 | 1 | 184 | 3 | 1 | 11 | 6 |
| 1090 | presurvey_arm_1 | 1 | 184 | 3 | 1 | 11 | 6 |
| 1091 | presurvey_arm_1 | 1 | 184 | 3 | 1 | 11 | 6 |
| 1092 | presurvey_arm_1 | 1 | 184 | 3 | 1 | 12 | 6 |
| 1093 | presurvey_arm_1 | 1 | 184 | 3 | 1 | 12 | 6 |
| 1094 | presurvey_arm_1 | 1 | 184 | 3 | 1 | 11 | 6 |
| 1095 | presurvey_arm_1 | 1 | 184 | 3 | 1 | 11 | 6 |
| 1096 | presurvey_arm_1 | 1 | 184 | 3 | 1 | 11 | 6 |
| 1097 | presurvey_arm_1 | 1 | 184 | 2 | 1 | 11 | 6 |
| 1098 | presurvey_arm_1 | 1 | 184 | 3 | 1 | 11 | 6 |
| 1099 | presurvey_arm_1 | 1 | 184 | 3 | 1 | 11 | 6 |
| 1100 | presurvey_arm_1 | 1 | 184 | 2 | 1 | 11 | 6 |
| 1101 | presurvey_arm_1 | 1 | 184 | 3 | 1 | 11 | 6 |
| 1102 | presurvey_arm_1 | 2 | 185 | 3 | 1 | 13 | 7 |
| 1103 | presurvey_arm_1 | 2 | 185 | 3 | 1 | 12 | 7 |
| 1104 | presurvey_arm_1 | 2 | 185 | 3 | 1 | 12 | 7 |
| 1105 | presurvey_arm_1 | 2 | 185 | 3 | 1 | 12 | 7 |
| 1106 | presurvey_arm_1 | 2 | 185 | 3 | 1 | 13 | 7 |
| 1107 | presurvey_arm_1 | 2 | 185 | 3 | 1 | 13 | 7 |
| 1108 | presurvey_arm_1 | 2 | 185 | 3 | 1 | 12 | 7 |
| 1109 | presurvey_arm_1 | 2 | 185 | 2 | 1 | 12 | 7 |
| 1110 | presurvey_arm_1 | 2 | 185 | 3 | 1 | 12 | 7 |
| 1111 | presurvey_arm_1 | 2 | 185 | 3 | 1 | 12 | 7 |
| 1112 | presurvey_arm_1 | 2 | 185 | 3 | 1 | 13 | 7 |
| 1113 | presurvey_arm_1 | 2 | 185 | 3 | 1 | 14 | 7 |
| 1114 | presurvey_arm_1 | 2 | 185 | 3 | 1 | 12 | 7 |
| 1115 | presurvey_arm_1 | 2 | 185 | 3 | 1 | 11 | 7 |
| 1116 | presurvey_arm_1 | 2 | 185 | 3 | 1 | 12 | 7 |
| 1117 | presurvey_arm_1 | 2 | 185 | 3 | 1 | 13 | 7 |
| 1118 | presurvey_arm_1 | 2 | 185 | 3 | 1 | 12 | 7 |
| 1119 | presurvey_arm_1 | 2 | 185 | 3 | 1 | 12 | 7 |
| 1120 | presurvey_arm_1 | 2 | 185 | 3 | 1 | 12 | 7 |
| 1121 | presurvey_arm_1 | 2 | 185 | 3 | 1 | 13 | 7 |
| 1122 | presurvey_arm_1 | 2 | 185 | 3 | 1 | 12 | 7 |
| 1123 | presurvey_arm_1 | 2 | 185 | 3 | 1 | 13 | 7 |
| 1124 | presurvey_arm_1 | 2 | 185 | 3 | 1 | 14 | 8 |
| 1125 | presurvey_arm_1 | 2 | 185 | 3 | 1 | 13 | 7 |
| 1126 | presurvey_arm_1 | 2 | 186 | 3 | 1 | 12 | 7 |
| 1127 | presurvey_arm_1 | 2 | 186 | 3 | 1 | 12 | 7 |
| 1128 | presurvey_arm_1 | 2 | 186 | 3 | 1 | 13 | 7 |
| 1129 | presurvey_arm_1 | 2 | 186 | 3 | 1 | 12 | 7 |
| 1130 | presurvey_arm_1 | 2 | 186 | 3 | 1 | 12 | 7 |
| 1131 | presurvey_arm_1 | 2 | 186 | 3 | 1 | 12 | 7 |
| 1132 | presurvey_arm_1 | 2 | 186 | 3 | 1 | 12 | 7 |
| 1133 | presurvey_arm_1 | 2 | 186 | 3 | 1 | 11 | 7 |
| 1134 | presurvey_arm_1 | 2 | 186 | 2 | 1 | 12 | 7 |
| 1135 | presurvey_arm_1 | 2 | 186 | 3 | 1 | 12 | 7 |

|      |                 |   |     |   |   |    |    |
|------|-----------------|---|-----|---|---|----|----|
| 1136 | presurvey_arm_1 | 2 | 186 | 3 | 1 | 12 | 7  |
| 1137 | presurvey_arm_1 | 2 | 186 | 3 | 1 | 11 | 7  |
| 1138 | presurvey_arm_1 | 2 | 186 | 2 | 1 | 12 | 7  |
| 1139 | presurvey_arm_1 | 2 | 186 | 3 | 1 | 12 | 7  |
| 1140 | presurvey_arm_1 | 2 | 186 | 3 | 1 | 12 | 7  |
| 1141 | presurvey_arm_1 | 2 | 186 | 3 | 1 | 12 | 7  |
| 1142 | presurvey_arm_1 | 3 | 187 | 3 | 1 | 15 | 8  |
| 1143 | presurvey_arm_1 | 3 | 187 | 3 | 1 | 13 | 8  |
| 1144 | presurvey_arm_1 | 3 | 187 | 3 | 1 | 13 | 8  |
| 1145 | presurvey_arm_1 | 3 | 187 | 2 | 1 | 13 | 8  |
| 1146 | presurvey_arm_1 | 3 | 187 | 3 | 1 | 13 | 8  |
| 1147 | presurvey_arm_1 | 3 | 187 | 2 | 1 | 13 | 8  |
| 1148 | presurvey_arm_1 | 3 | 187 | 3 | 1 | 13 | 8  |
| 1149 | presurvey_arm_1 | 3 | 187 | 3 | 1 | 14 | 8  |
| 1150 | presurvey_arm_1 | 3 | 187 | 3 | 1 | 14 | 8  |
| 1151 | presurvey_arm_1 | 3 | 187 | 3 | 1 | 14 | 8  |
| 1152 | presurvey_arm_1 | 3 | 187 | 2 | 1 | 13 | 8  |
| 1153 | presurvey_arm_1 | 3 | 187 | 2 | 1 | 13 | 8  |
| 1154 | presurvey_arm_1 | 3 | 187 | 3 | 1 | 13 | 8  |
| 1155 | presurvey_arm_1 | 3 | 187 | 3 | 1 | 13 | 8  |
| 1156 | presurvey_arm_1 | 3 | 187 | 3 | 1 | 13 | 8  |
| 1157 | presurvey_arm_1 | 3 | 187 | 3 | 1 | 13 | 8  |
| 1158 | presurvey_arm_1 | 3 | 187 | 3 | 1 | 13 | 8  |
| 1159 | presurvey_arm_1 | 3 | 187 | 3 | 1 | 14 | 8  |
| 1160 | presurvey_arm_1 | 3 | 187 | 3 | 1 | 13 | 8  |
| 1161 | presurvey_arm_1 | 1 | 191 | 2 | 1 | 12 | 6  |
| 1162 | presurvey_arm_1 | 1 | 191 | 3 | 1 | 11 | 6  |
| 1163 | presurvey_arm_1 | 1 | 191 | 3 | 1 | 11 | 6  |
| 1164 | presurvey_arm_1 | 1 | 191 | 3 | 1 | 11 | 6  |
| 1165 | presurvey_arm_1 | 1 | 191 | 3 | 1 | 11 | 99 |
| 1166 | presurvey_arm_1 | 1 | 191 | 3 | 1 | 11 | 6  |
| 1167 | presurvey_arm_1 | 1 | 191 | 3 | 1 | 12 | 6  |
| 1168 | presurvey_arm_1 | 1 | 191 | 3 | 1 | 12 | 6  |
| 1169 | presurvey_arm_1 | 1 | 191 | 3 | 1 | 11 | 6  |
| 1170 | presurvey_arm_1 | 1 | 191 | 3 | 1 | 11 | 6  |
| 1171 | presurvey_arm_1 | 1 | 191 | 3 | 1 | 11 | 6  |
| 1172 | presurvey_arm_1 | 1 | 191 | 3 | 1 | 12 | 6  |
| 1173 | presurvey_arm_1 | 1 | 191 | 3 | 1 | 12 | 6  |
| 1174 | presurvey_arm_1 | 1 | 191 | 3 | 1 | 11 | 6  |
| 1175 | presurvey_arm_1 | 1 | 191 | 3 | 1 | 11 | 6  |
| 1176 | presurvey_arm_1 | 1 | 191 | 3 | 1 | 11 | 6  |
| 1177 | presurvey_arm_1 | 1 | 191 | 3 | 1 | 11 | 6  |
| 1178 | presurvey_arm_1 | 1 | 191 | 3 | 1 | 11 | 6  |
| 1179 | presurvey_arm_1 | 1 | 191 | 3 | 1 | 11 | 6  |
| 1180 | presurvey_arm_1 | 1 | 191 | 3 | 1 | 11 | 6  |
| 1181 | presurvey_arm_1 | 1 | 191 | 3 | 1 | 11 | 6  |
| 1182 | presurvey_arm_1 | 1 | 191 | 3 | 1 | 12 | 6  |
| 1183 | presurvey_arm_1 | 1 | 191 | 3 | 1 | 12 | 6  |

|      |                 |   |     |   |   |    |   |
|------|-----------------|---|-----|---|---|----|---|
| 1184 | presurvey_arm_1 | 1 | 191 | 3 | 1 | 11 | 6 |
| 1185 | presurvey_arm_1 | 1 | 191 | 3 | 1 | 11 | 6 |
| 1186 | presurvey_arm_1 | 1 | 192 | 3 | 1 | 11 | 6 |
| 1187 | presurvey_arm_1 | 1 | 192 | 3 | 1 | 11 | 6 |
| 1188 | presurvey_arm_1 | 1 | 192 | 3 | 1 | 11 | 6 |
| 1189 | presurvey_arm_1 | 1 | 192 | 2 | 1 | 11 | 6 |
| 1190 | presurvey_arm_1 | 1 | 192 | 3 | 1 | 11 | 6 |
| 1191 | presurvey_arm_1 | 1 | 192 | 3 | 1 | 11 | 6 |
| 1192 | presurvey_arm_1 | 1 | 192 | 3 | 1 | 11 | 6 |
| 1193 | presurvey_arm_1 | 1 | 192 | 3 | 1 | 11 | 6 |
| 1194 | presurvey_arm_1 | 1 | 192 | 3 | 1 | 11 | 6 |
| 1195 | presurvey_arm_1 | 1 | 192 | 3 | 1 | 11 | 6 |
| 1196 | presurvey_arm_1 | 1 | 192 | 3 | 1 | 11 | 7 |
| 1197 | presurvey_arm_1 | 1 | 192 | 3 | 1 | 11 | 6 |
| 1198 | presurvey_arm_1 | 1 | 192 | 3 | 1 | 11 | 6 |
| 1199 | presurvey_arm_1 | 1 | 192 | 3 | 1 | 11 | 6 |
| 1200 | presurvey_arm_1 | 1 | 192 | 3 | 1 | 11 | 6 |
| 1201 | presurvey_arm_1 | 1 | 192 | 3 | 1 | 11 | 6 |
| 1202 | presurvey_arm_1 | 1 | 192 | 3 | 1 | 11 | 6 |
| 1203 | presurvey_arm_1 | 1 | 192 | 3 | 1 | 99 | 6 |
| 1204 | presurvey_arm_1 | 2 | 193 | 3 | 1 | 13 | 7 |
| 1205 | presurvey_arm_1 | 2 | 193 | 2 | 1 | 12 | 7 |
| 1206 | presurvey_arm_1 | 2 | 193 | 3 | 1 | 12 | 7 |
| 1207 | presurvey_arm_1 | 2 | 193 | 3 | 1 | 12 | 7 |
| 1208 | presurvey_arm_1 | 2 | 193 | 3 | 1 | 12 | 7 |
| 1209 | presurvey_arm_1 | 2 | 193 | 3 | 1 | 12 | 7 |
| 1210 | presurvey_arm_1 | 2 | 193 | 3 | 1 | 12 | 7 |
| 1211 | presurvey_arm_1 | 2 | 193 | 2 | 1 | 12 | 7 |
| 1212 | presurvey_arm_1 | 2 | 193 | 3 | 1 | 12 | 7 |
| 1213 | presurvey_arm_1 | 2 | 193 | 3 | 1 | 12 | 7 |
| 1214 | presurvey_arm_1 | 2 | 193 | 3 | 1 | 12 | 7 |
| 1215 | presurvey_arm_1 | 2 | 193 | 3 | 1 | 12 | 7 |
| 1216 | presurvey_arm_1 | 2 | 193 | 3 | 1 | 12 | 7 |
| 1217 | presurvey_arm_1 | 2 | 193 | 3 | 1 | 12 | 7 |
| 1218 | presurvey_arm_1 | 2 | 193 | 3 | 1 | 12 | 7 |
| 1219 | presurvey_arm_1 | 2 | 193 | 3 | 1 | 12 | 7 |
| 1220 | presurvey_arm_1 | 2 | 193 | 3 | 1 | 12 | 7 |
| 1221 | presurvey_arm_1 | 2 | 193 | 2 | 1 | 13 | 7 |
| 1222 | presurvey_arm_1 | 2 | 193 | 3 | 1 | 12 | 7 |
| 1223 | presurvey_arm_1 | 2 | 193 | 3 | 1 | 12 | 7 |
| 1224 | presurvey_arm_1 | 2 | 193 | 3 | 1 | 13 | 7 |
| 1225 | presurvey_arm_1 | 2 | 193 | 3 | 1 | 12 | 7 |
| 1226 | presurvey_arm_1 | 2 | 193 | 3 | 1 | 12 | 7 |
| 1227 | presurvey_arm_1 | 2 | 193 | 3 | 1 | 12 | 7 |
| 1228 | presurvey_arm_1 | 2 | 194 | 2 | 1 | 12 | 7 |
| 1229 | presurvey_arm_1 | 2 | 194 | 3 | 1 | 12 | 7 |
| 1230 | presurvey_arm_1 | 2 | 194 | 3 | 1 | 12 | 7 |
| 1231 | presurvey_arm_1 | 2 | 194 | 3 | 1 | 12 | 7 |



|      |                 |   |     |   |   |    |   |
|------|-----------------|---|-----|---|---|----|---|
| 1232 | presurvey_arm_1 | 2 | 194 | 3 | 1 | 13 | 7 |
| 1233 | presurvey_arm_1 | 2 | 194 | 3 | 1 | 12 | 7 |
| 1234 | presurvey_arm_1 | 2 | 194 | 3 | 1 | 12 | 7 |
| 1235 | presurvey_arm_1 | 2 | 194 | 3 | 1 | 12 | 7 |
| 1236 | presurvey_arm_1 | 2 | 194 | 3 | 1 | 12 | 7 |
| 1237 | presurvey_arm_1 | 2 | 194 | 3 | 1 | 12 | 7 |
| 1238 | presurvey_arm_1 | 2 | 194 | 3 | 1 | 12 | 7 |
| 1239 | presurvey_arm_1 | 2 | 194 | 3 | 1 | 12 | 7 |
| 1240 | presurvey_arm_1 | 2 | 194 | 3 | 1 | 12 | 7 |
| 1241 | presurvey_arm_1 | 2 | 194 | 3 | 1 | 13 | 7 |
| 1242 | presurvey_arm_1 | 2 | 194 | 3 | 1 | 12 | 7 |
| 1243 | presurvey_arm_1 | 3 | 195 | 3 | 1 | 13 | 8 |
| 1244 | presurvey_arm_1 | 3 | 195 | 3 | 1 | 14 | 8 |
| 1245 | presurvey_arm_1 | 3 | 195 | 3 | 1 | 14 | 8 |
| 1246 | presurvey_arm_1 | 3 | 195 | 3 | 1 | 13 | 8 |
| 1247 | presurvey_arm_1 | 3 | 195 | 3 | 1 | 14 | 8 |
| 1248 | presurvey_arm_1 | 3 | 195 | 3 | 1 | 13 | 8 |
| 1249 | presurvey_arm_1 | 3 | 195 | 3 | 1 | 13 | 8 |
| 1250 | presurvey_arm_1 | 3 | 195 | 3 | 1 | 14 | 8 |
| 1251 | presurvey_arm_1 | 3 | 195 | 3 | 1 | 13 | 8 |
| 1252 | presurvey_arm_1 | 3 | 195 | 3 | 1 | 13 | 8 |
| 1253 | presurvey_arm_1 | 3 | 195 | 3 | 1 | 14 | 8 |
| 1254 | presurvey_arm_1 | 3 | 195 | 3 | 1 | 13 | 8 |
| 1255 | presurvey_arm_1 | 3 | 195 | 3 | 1 | 13 | 8 |
| 1256 | presurvey_arm_1 | 3 | 195 | 3 | 1 | 13 | 8 |
| 1257 | presurvey_arm_1 | 3 | 195 | 3 | 1 | 14 | 8 |
| 1258 | presurvey_arm_1 | 3 | 195 | 3 | 1 | 14 | 8 |
| 1452 | presurvey_arm_1 | 1 | 196 | 3 | 1 | 12 | 6 |
| 1453 | presurvey_arm_1 | 1 | 196 | 3 | 1 | 12 | 6 |
| 1454 | presurvey_arm_1 | 1 | 196 | 3 | 1 | 11 | 6 |
| 1455 | presurvey_arm_1 | 1 | 196 | 3 | 1 | 12 | 6 |
| 1456 | presurvey_arm_1 | 1 | 196 | 3 | 1 | 12 | 6 |
| 1457 | presurvey_arm_1 | 1 | 196 | 3 | 1 | 11 | 6 |
| 1458 | presurvey_arm_1 | 1 | 196 | 3 | 1 | 11 | 6 |
| 1459 | presurvey_arm_1 | 1 | 196 | 3 | 1 | 11 | 6 |
| 1460 | presurvey_arm_1 | 1 | 196 | 3 | 1 | 12 | 6 |
| 1461 | presurvey_arm_1 | 1 | 196 | 3 | 1 | 12 | 6 |
| 1462 | presurvey_arm_1 | 1 | 196 | 3 | 1 | 12 | 6 |
| 1463 | presurvey_arm_1 | 1 | 196 | 3 | 1 | 11 | 6 |
| 1464 | presurvey_arm_1 | 1 | 196 | 3 | 1 | 11 | 6 |
| 1465 | presurvey_arm_1 | 1 | 196 | 3 | 1 | 12 | 6 |
| 1466 | presurvey_arm_1 | 1 | 196 | 3 | 1 | 11 | 6 |
| 1467 | presurvey_arm_1 | 1 | 196 | 3 | 1 | 11 | 6 |
| 1468 | presurvey_arm_1 | 1 | 196 | 3 | 1 | 11 | 6 |
| 1469 | presurvey_arm_1 | 1 | 196 | 3 | 1 | 12 | 6 |
| 1470 | presurvey_arm_1 | 1 | 196 | 3 | 1 | 11 | 6 |
| 1471 | presurvey_arm_1 | 1 | 196 | 3 | 1 | 11 | 6 |
| 1472 | presurvey_arm_1 | 1 | 196 | 3 | 1 | 12 | 6 |

|      |                 |   |     |   |   |    |    |
|------|-----------------|---|-----|---|---|----|----|
| 1473 | presurvey_arm_1 | 1 | 196 | 3 | 1 | 11 | 6  |
| 1474 | presurvey_arm_1 | 1 | 196 | 3 | 1 | 11 | 6  |
| 1475 | presurvey_arm_1 | 1 | 196 | 3 | 1 | 12 | 6  |
| 1476 | presurvey_arm_1 | 1 | 196 | 3 | 1 | 12 | 6  |
| 1477 | presurvey_arm_1 | 1 | 196 | 3 | 1 | 11 | 6  |
| 1478 | presurvey_arm_1 | 1 | 197 | 3 | 1 | 11 | 6  |
| 1479 | presurvey_arm_1 | 1 | 197 | 3 | 1 | 11 | 6  |
| 1480 | presurvey_arm_1 | 1 | 197 | 3 | 1 | 11 | 6  |
| 1481 | presurvey_arm_1 | 1 | 197 | 3 | 1 | 11 | 6  |
| 1482 | presurvey_arm_1 | 1 | 197 | 3 | 1 | 11 | 6  |
| 1483 | presurvey_arm_1 | 1 | 197 | 3 | 1 | 12 | 6  |
| 1484 | presurvey_arm_1 | 1 | 197 | 3 | 1 | 12 | 6  |
| 1485 | presurvey_arm_1 | 1 | 197 | 3 | 1 | 11 | 6  |
| 1486 | presurvey_arm_1 | 1 | 197 | 3 | 1 | 11 | 6  |
| 1487 | presurvey_arm_1 | 1 | 197 | 3 | 1 | 11 | 6  |
| 1488 | presurvey_arm_1 | 1 | 197 | 3 | 1 | 12 | 6  |
| 1489 | presurvey_arm_1 | 1 | 197 | 2 | 1 | 11 | 6  |
| 1490 | presurvey_arm_1 | 1 | 197 | 3 | 1 | 11 | 6  |
| 1491 | presurvey_arm_1 | 1 | 197 | 3 | 1 | 12 | 6  |
| 1492 | presurvey_arm_1 | 1 | 197 | 3 | 1 | 11 | 6  |
| 1493 | presurvey_arm_1 | 2 | 198 | 3 | 1 | 12 | 7  |
| 1494 | presurvey_arm_1 | 2 | 198 | 3 | 1 | 12 | 7  |
| 1495 | presurvey_arm_1 | 2 | 198 | 3 | 1 | 13 | 7  |
| 1496 | presurvey_arm_1 | 2 | 198 | 3 | 1 | 12 | 7  |
| 1497 | presurvey_arm_1 | 2 | 198 | 3 | 1 | 12 | 7  |
| 1498 | presurvey_arm_1 | 2 | 198 | 3 | 1 | 13 | 7  |
| 1499 | presurvey_arm_1 | 2 | 198 | 3 | 1 | 12 | 7  |
| 1500 | presurvey_arm_1 | 2 | 198 | 3 | 1 | 12 | 99 |
| 1501 | presurvey_arm_1 | 2 | 198 | 2 | 1 | 12 | 7  |
| 1502 | presurvey_arm_1 | 2 | 198 | 3 | 1 | 13 | 7  |
| 1503 | presurvey_arm_1 | 2 | 198 | 3 | 1 | 12 | 7  |
| 1504 | presurvey_arm_1 | 2 | 198 | 3 | 1 | 12 | 7  |
| 1505 | presurvey_arm_1 | 2 | 198 | 3 | 1 | 12 | 7  |
| 1506 | presurvey_arm_1 | 2 | 198 | 3 | 1 | 12 | 7  |
| 1507 | presurvey_arm_1 | 2 | 198 | 3 | 1 | 12 | 7  |
| 1508 | presurvey_arm_1 | 2 | 198 | 3 | 1 | 12 | 7  |
| 1509 | presurvey_arm_1 | 2 | 198 | 3 | 1 | 13 | 7  |
| 1510 | presurvey_arm_1 | 2 | 198 | 3 | 1 | 13 | 7  |
| 1511 | presurvey_arm_1 | 2 | 198 | 3 | 1 | 13 | 7  |
| 1512 | presurvey_arm_1 | 2 | 198 | 3 | 1 | 13 | 7  |
| 1513 | presurvey_arm_1 | 2 | 198 | 3 | 1 | 12 | 7  |
| 1514 | presurvey_arm_1 | 2 | 198 | 3 | 1 | 12 | 7  |
| 1515 | presurvey_arm_1 | 2 | 198 | 3 | 1 | 12 | 7  |
| 1516 | presurvey_arm_1 | 2 | 199 | 3 | 1 | 12 | 7  |
| 1517 | presurvey_arm_1 | 2 | 199 | 3 | 1 | 12 | 7  |
| 1518 | presurvey_arm_1 | 2 | 199 | 3 | 1 | 12 | 7  |
| 1519 | presurvey_arm_1 | 2 | 199 | 3 | 1 | 13 | 7  |
| 1520 | presurvey_arm_1 | 2 | 199 | 3 | 1 | 13 | 7  |

|      |                 |   |     |   |   |    |   |
|------|-----------------|---|-----|---|---|----|---|
| 1521 | presurvey_arm_1 | 2 | 199 | 3 | 1 | 12 | 7 |
| 1522 | presurvey_arm_1 | 2 | 199 | 3 | 1 | 12 | 7 |
| 1523 | presurvey_arm_1 | 2 | 199 | 3 | 1 | 12 | 7 |
| 1524 | presurvey_arm_1 | 2 | 199 | 3 | 1 | 12 | 7 |
| 1525 | presurvey_arm_1 | 2 | 199 | 3 | 1 | 12 | 7 |
| 1526 | presurvey_arm_1 | 2 | 199 | 3 | 1 | 13 | 7 |
| 1527 | presurvey_arm_1 | 2 | 199 | 3 | 1 | 12 | 7 |
| 1528 | presurvey_arm_1 | 2 | 199 | 3 | 1 | 12 | 7 |
| 1529 | presurvey_arm_1 | 2 | 199 | 3 | 1 | 13 | 7 |
| 1530 | presurvey_arm_1 | 2 | 199 | 3 | 1 | 12 | 7 |
| 1531 | presurvey_arm_1 | 3 | 200 | 3 | 1 | 14 | 8 |
| 1532 | presurvey_arm_1 | 3 | 200 | 3 | 1 | 14 | 8 |
| 1533 | presurvey_arm_1 | 3 | 200 | 3 | 1 | 13 | 8 |
| 1534 | presurvey_arm_1 | 3 | 200 | 3 | 1 | 13 | 8 |
| 1535 | presurvey_arm_1 | 3 | 200 | 3 | 1 | 14 | 8 |
| 1536 | presurvey_arm_1 | 3 | 200 | 2 | 1 | 14 | 8 |
| 1537 | presurvey_arm_1 | 3 | 200 | 3 | 1 | 14 | 8 |
| 1538 | presurvey_arm_1 | 3 | 200 | 3 | 1 | 13 | 8 |
| 1539 | presurvey_arm_1 | 3 | 200 | 3 | 1 | 13 | 8 |
| 1540 | presurvey_arm_1 | 3 | 200 | 3 | 1 | 13 | 8 |
| 1541 | presurvey_arm_1 | 3 | 200 | 3 | 1 | 13 | 8 |
| 1542 | presurvey_arm_1 | 3 | 200 | 3 | 1 | 13 | 8 |
| 1543 | presurvey_arm_1 | 3 | 200 | 3 | 1 | 14 | 8 |
| 1544 | presurvey_arm_1 | 3 | 200 | 3 | 1 | 13 | 8 |
| 1545 | presurvey_arm_1 | 3 | 200 | 3 | 1 | 13 | 8 |
| 1546 | presurvey_arm_1 | 3 | 200 | 3 | 1 | 13 | 8 |
| 1547 | presurvey_arm_1 | 3 | 201 | 3 | 1 | 13 | 8 |
| 1548 | presurvey_arm_1 | 3 | 201 | 3 | 1 | 14 | 8 |
| 1549 | presurvey_arm_1 | 3 | 201 | 2 | 1 | 13 | 8 |
| 1550 | presurvey_arm_1 | 3 | 201 | 3 | 1 | 14 | 8 |
| 1551 | presurvey_arm_1 | 3 | 201 | 3 | 1 | 13 | 8 |
| 1552 | presurvey_arm_1 | 3 | 201 | 3 | 1 | 14 | 8 |
| 1553 | presurvey_arm_1 | 3 | 201 | 3 | 1 | 13 | 8 |
| 1554 | presurvey_arm_1 | 3 | 201 | 3 | 1 | 13 | 8 |
| 1555 | presurvey_arm_1 | 3 | 201 | 3 | 1 | 15 | 8 |
| 1556 | presurvey_arm_1 | 3 | 201 | 3 | 1 | 14 | 8 |
| 1557 | presurvey_arm_1 | 3 | 201 | 3 | 1 | 14 | 8 |
| 1558 | presurvey_arm_1 | 3 | 201 | 3 | 1 | 13 | 8 |
| 1559 | presurvey_arm_1 | 3 | 201 | 3 | 1 | 13 | 8 |
| 1560 | presurvey_arm_1 | 3 | 201 | 3 | 1 | 13 | 8 |
| 1561 | presurvey_arm_1 | 3 | 201 | 3 | 1 | 13 | 8 |
| 1562 | presurvey_arm_1 | 3 | 201 | 3 | 1 | 13 | 8 |
| 1563 | presurvey_arm_1 | 3 | 201 | 3 | 1 | 13 | 8 |
| 1564 | presurvey_arm_1 | 3 | 201 | 3 | 1 | 13 | 8 |
| 1565 | presurvey_arm_1 | 3 | 201 | 3 | 1 | 13 | 8 |
| 1566 | presurvey_arm_1 | 3 | 201 | 3 | 1 | 14 | 8 |
| 1567 | presurvey_arm_1 | 3 | 201 | 3 | 1 | 13 | 8 |
| 1568 | presurvey_arm_1 | 3 | 201 | 3 | 1 | 14 | 8 |

|      |                 |   |     |   |   |    |   |
|------|-----------------|---|-----|---|---|----|---|
| 1569 | presurvey_arm_1 | 3 | 201 | 3 | 1 | 13 | 8 |
| 1570 | presurvey_arm_1 | 3 | 201 | 3 | 1 | 13 | 8 |
| 1571 | presurvey_arm_1 | 3 | 201 | 3 | 1 | 14 | 8 |
| 1572 | presurvey_arm_1 | 3 | 201 | 3 | 1 | 13 | 8 |
| 1573 | presurvey_arm_1 | 3 | 201 | 3 | 1 | 10 | 6 |
| 1574 | presurvey_arm_1 | 3 | 201 | 3 | 1 | 14 | 8 |
| 1575 | presurvey_arm_1 | 3 | 201 | 3 | 1 | 14 | 8 |
| 1576 | presurvey_arm_1 | 3 | 201 | 3 | 1 | 14 | 8 |
| 1705 | presurvey_arm_1 | 1 | 205 | 3 | 1 | 11 | 6 |
| 1706 | presurvey_arm_1 | 1 | 205 | 3 | 1 | 12 | 6 |
| 1707 | presurvey_arm_1 | 1 | 205 | 3 | 1 | 11 | 6 |
| 1708 | presurvey_arm_1 | 1 | 205 | 3 | 1 | 12 | 6 |
| 1709 | presurvey_arm_1 | 1 | 205 | 3 | 1 | 11 | 6 |
| 1710 | presurvey_arm_1 | 1 | 205 | 3 | 1 | 11 | 6 |
| 1711 | presurvey_arm_1 | 1 | 205 | 3 | 1 | 11 | 6 |
| 1712 | presurvey_arm_1 | 1 | 205 | 3 | 1 | 11 | 6 |
| 1713 | presurvey_arm_1 | 1 | 205 | 3 | 1 | 11 | 6 |
| 1714 | presurvey_arm_1 | 1 | 205 | 3 | 1 | 11 | 6 |
| 1715 | presurvey_arm_1 | 1 | 205 | 3 | 1 | 11 | 6 |
| 1716 | presurvey_arm_1 | 1 | 205 | 3 | 1 | 12 | 6 |
| 1717 | presurvey_arm_1 | 1 | 205 | 3 | 1 | 12 | 6 |
| 1718 | presurvey_arm_1 | 1 | 205 | 3 | 1 | 11 | 6 |
| 1719 | presurvey_arm_1 | 1 | 205 | 3 | 1 | 11 | 6 |
| 1720 | presurvey_arm_1 | 1 | 205 | 3 | 1 | 12 | 6 |
| 1721 | presurvey_arm_1 | 1 | 205 | 3 | 1 | 11 | 6 |
| 1722 | presurvey_arm_1 | 1 | 205 | 3 | 1 | 11 | 6 |
| 1723 | presurvey_arm_1 | 1 | 205 | 3 | 1 | 12 | 7 |
| 1724 | presurvey_arm_1 | 1 | 205 | 3 | 1 | 11 | 6 |
| 1725 | presurvey_arm_1 | 1 | 205 | 3 | 1 | 12 | 6 |
| 1726 | presurvey_arm_1 | 1 | 205 | 3 | 1 | 12 | 6 |
| 1727 | presurvey_arm_1 | 1 | 205 | 3 | 1 | 12 | 6 |
| 1728 | presurvey_arm_1 | 1 | 205 | 3 | 1 | 12 | 6 |
| 1729 | presurvey_arm_1 | 1 | 205 | 3 | 1 | 11 | 6 |
| 1730 | presurvey_arm_1 | 1 | 205 | 3 | 1 | 12 | 6 |
| 1731 | presurvey_arm_1 | 1 | 205 | 3 | 1 | 12 | 6 |
| 1732 | presurvey_arm_1 | 1 | 205 | 3 | 1 | 11 | 6 |
| 1733 | presurvey_arm_1 | 1 | 206 | 3 | 1 | 12 | 6 |
| 1734 | presurvey_arm_1 | 1 | 206 | 3 | 1 | 11 | 6 |
| 1735 | presurvey_arm_1 | 1 | 206 | 3 | 1 | 11 | 6 |
| 1736 | presurvey_arm_1 | 1 | 206 | 3 | 1 | 12 | 6 |
| 1737 | presurvey_arm_1 | 1 | 206 | 3 | 1 | 11 | 6 |
| 1738 | presurvey_arm_1 | 1 | 206 | 3 | 1 | 12 | 6 |
| 1739 | presurvey_arm_1 | 1 | 206 | 3 | 1 | 12 | 6 |
| 1740 | presurvey_arm_1 | 1 | 206 | 3 | 1 | 12 | 6 |
| 1741 | presurvey_arm_1 | 1 | 206 | 3 | 1 | 12 | 6 |
| 1742 | presurvey_arm_1 | 1 | 206 | 3 | 1 | 11 | 6 |
| 1743 | presurvey_arm_1 | 1 | 206 | 3 | 1 | 11 | 6 |
| 1744 | presurvey_arm_1 | 1 | 206 | 3 | 1 | 11 | 6 |

|      |                 |   |     |   |   |    |   |
|------|-----------------|---|-----|---|---|----|---|
| 1745 | presurvey_arm_1 | 1 | 206 | 3 | 1 | 11 | 6 |
| 1746 | presurvey_arm_1 | 1 | 206 | 3 | 1 | 12 | 6 |
| 1747 | presurvey_arm_1 | 1 | 206 | 3 | 1 | 12 | 6 |
| 1748 | presurvey_arm_1 | 1 | 206 | 3 | 1 | 12 | 6 |
| 1749 | presurvey_arm_1 | 1 | 206 | 3 | 1 | 11 | 6 |
| 1750 | presurvey_arm_1 | 1 | 206 | 3 | 1 | 11 | 6 |
| 1751 | presurvey_arm_1 | 1 | 206 | 3 | 1 | 12 | 6 |
| 1752 | presurvey_arm_1 | 1 | 206 | 3 | 1 | 12 | 6 |
| 1753 | presurvey_arm_1 | 1 | 206 | 3 | 1 | 11 | 6 |
| 1754 | presurvey_arm_1 | 1 | 206 | 3 | 1 | 12 | 6 |
| 1755 | presurvey_arm_1 | 1 | 206 | 3 | 1 | 11 | 6 |
| 1756 | presurvey_arm_1 | 2 | 207 | 3 | 1 | 13 | 7 |
| 1757 | presurvey_arm_1 | 2 | 207 | 3 | 1 | 13 | 7 |
| 1758 | presurvey_arm_1 | 2 | 207 | 3 | 1 | 12 | 7 |
| 1759 | presurvey_arm_1 | 2 | 207 | 3 | 1 | 13 | 7 |
| 1760 | presurvey_arm_1 | 2 | 207 | 3 | 1 | 13 | 7 |
| 1761 | presurvey_arm_1 | 2 | 207 | 3 | 1 | 12 | 7 |
| 1762 | presurvey_arm_1 | 2 | 207 | 3 | 1 | 13 | 7 |
| 1763 | presurvey_arm_1 | 2 | 207 | 3 | 1 | 12 | 7 |
| 1764 | presurvey_arm_1 | 2 | 207 | 3 | 1 | 12 | 7 |
| 1765 | presurvey_arm_1 | 2 | 207 | 3 | 1 | 13 | 7 |
| 1766 | presurvey_arm_1 | 2 | 207 | 3 | 1 | 13 | 7 |
| 1767 | presurvey_arm_1 | 2 | 207 | 3 | 1 | 13 | 7 |
| 1768 | presurvey_arm_1 | 2 | 207 | 3 | 1 | 12 | 7 |
| 1769 | presurvey_arm_1 | 2 | 207 | 3 | 1 | 12 | 7 |
| 1770 | presurvey_arm_1 | 2 | 207 | 3 | 1 | 12 | 7 |
| 1771 | presurvey_arm_1 | 2 | 207 | 3 | 1 | 13 | 7 |
| 1772 | presurvey_arm_1 | 2 | 207 | 3 | 1 | 12 | 7 |
| 1773 | presurvey_arm_1 | 2 | 207 | 3 | 1 | 13 | 7 |
| 1774 | presurvey_arm_1 | 2 | 207 | 3 | 1 | 12 | 7 |
| 1775 | presurvey_arm_1 | 2 | 207 | 3 | 1 | 13 | 7 |
| 1776 | presurvey_arm_1 | 2 | 207 | 3 | 1 | 13 | 7 |
| 1777 | presurvey_arm_1 | 2 | 207 | 3 | 1 | 13 | 7 |
| 1778 | presurvey_arm_1 | 2 | 207 | 3 | 1 | 14 | 7 |
| 1779 | presurvey_arm_1 | 2 | 207 | 3 | 1 | 12 | 7 |
| 1780 | presurvey_arm_1 | 2 | 207 | 3 | 1 | 12 | 7 |
| 1781 | presurvey_arm_1 | 2 | 208 | 3 | 1 | 13 | 7 |
| 1782 | presurvey_arm_1 | 2 | 208 | 3 | 1 | 13 | 7 |
| 1783 | presurvey_arm_1 | 2 | 208 | 3 | 1 | 13 | 7 |
| 1784 | presurvey_arm_1 | 2 | 208 | 3 | 1 | 13 | 7 |
| 1785 | presurvey_arm_1 | 2 | 208 | 3 | 1 | 13 | 7 |
| 1786 | presurvey_arm_1 | 2 | 208 | 3 | 1 | 12 | 7 |
| 1787 | presurvey_arm_1 | 2 | 208 | 3 | 1 | 13 | 7 |
| 1788 | presurvey_arm_1 | 2 | 208 | 3 | 1 | 12 | 7 |
| 1789 | presurvey_arm_1 | 2 | 208 | 3 | 1 | 13 | 7 |
| 1790 | presurvey_arm_1 | 2 | 208 | 3 | 1 | 12 | 7 |
| 1791 | presurvey_arm_1 | 2 | 208 | 3 | 1 | 13 | 7 |
| 1792 | presurvey_arm_1 | 2 | 208 | 3 | 1 | 13 | 7 |

|      |                 |   |     |   |   |    |    |
|------|-----------------|---|-----|---|---|----|----|
| 1793 | presurvey_arm_1 | 2 | 208 | 3 | 1 | 13 | 7  |
| 1794 | presurvey_arm_1 | 2 | 208 | 3 | 1 | 12 | 7  |
| 1795 | presurvey_arm_1 | 2 | 208 | 3 | 1 | 13 | 7  |
| 1796 | presurvey_arm_1 | 2 | 208 | 3 | 1 | 13 | 7  |
| 1797 | presurvey_arm_1 | 3 | 209 | 3 | 1 | 14 | 8  |
| 1798 | presurvey_arm_1 | 3 | 209 | 3 | 1 | 13 | 8  |
| 1799 | presurvey_arm_1 | 3 | 209 | 3 | 1 | 14 | 8  |
| 1800 | presurvey_arm_1 | 3 | 209 | 3 | 1 | 14 | 8  |
| 1801 | presurvey_arm_1 | 3 | 209 | 3 | 1 | 13 | 8  |
| 1802 | presurvey_arm_1 | 3 | 209 | 3 | 1 | 13 | 8  |
| 1803 | presurvey_arm_1 | 3 | 209 | 3 | 1 | 14 | 8  |
| 1804 | presurvey_arm_1 | 3 | 209 | 3 | 1 | 13 | 8  |
| 1805 | presurvey_arm_1 | 3 | 209 | 3 | 1 | 14 | 8  |
| 1806 | presurvey_arm_1 | 3 | 209 | 3 | 1 | 14 | 8  |
| 1807 | presurvey_arm_1 | 3 | 209 | 3 | 1 | 13 | 8  |
| 1808 | presurvey_arm_1 | 3 | 209 | 3 | 1 | 14 | 8  |
| 1809 | presurvey_arm_1 | 3 | 209 | 3 | 1 | 14 | 8  |
| 1810 | presurvey_arm_1 | 3 | 209 | 3 | 1 | 13 | 8  |
| 1811 | presurvey_arm_1 | 3 | 209 | 3 | 1 | 14 | 8  |
| 1812 | presurvey_arm_1 | 3 | 209 | 3 | 1 | 14 | 8  |
| 1813 | presurvey_arm_1 | 3 | 209 | 3 | 1 | 14 | 8  |
| 1814 | presurvey_arm_1 | 3 | 210 | 3 | 1 | 14 | 8  |
| 1815 | presurvey_arm_1 | 3 | 210 | 3 | 1 | 14 | 8  |
| 1816 | presurvey_arm_1 | 3 | 210 | 3 | 1 | 14 | 8  |
| 1817 | presurvey_arm_1 | 3 | 210 | 3 | 1 | 14 | 8  |
| 1818 | presurvey_arm_1 | 3 | 210 | 3 | 1 | 13 | 8  |
| 1819 | presurvey_arm_1 | 3 | 210 | 3 | 1 | 14 | 8  |
| 1820 | presurvey_arm_1 | 3 | 210 | 3 | 1 | 13 | 8  |
| 1821 | presurvey_arm_1 | 3 | 210 | 3 | 1 | 14 | 8  |
| 1822 | presurvey_arm_1 | 3 | 210 | 3 | 1 | 14 | 8  |
| 1823 | presurvey_arm_1 | 3 | 210 | 3 | 1 | 14 | 8  |
| 1824 | presurvey_arm_1 | 3 | 210 | 3 | 1 | 14 | 8  |
| 1825 | presurvey_arm_1 | 3 | 210 | 3 | 1 | 14 | 8  |
| 1826 | presurvey_arm_1 | 3 | 210 | 3 | 1 | 14 | 8  |
| 1827 | presurvey_arm_1 | 3 | 210 | 3 | 1 | 13 | 8  |
| 1828 | presurvey_arm_1 | 3 | 210 | 3 | 1 | 14 | 8  |
| 1829 | presurvey_arm_1 | 3 | 210 | 3 | 1 | 14 | 8  |
| 1830 | presurvey_arm_1 | 3 | 210 | 3 | 1 | 13 | 8  |
| 1831 | presurvey_arm_1 | 3 | 210 | 3 | 1 | 13 | 8  |
| 1832 | presurvey_arm_1 | 3 | 210 | 3 | 1 | 15 | 8  |
| 1833 | presurvey_arm_1 | 3 | 210 | 3 | 1 | 14 | 8  |
| 1834 | presurvey_arm_1 | 3 | 210 | 3 | 1 | 15 | 8  |
| 1835 | presurvey_arm_1 | 3 | 210 | 3 | 1 | 14 | 8  |
| 1836 | presurvey_arm_1 | 3 | 210 | 3 | 1 | 14 | 8  |
| 1837 | presurvey_arm_1 | 3 | 210 | 3 | 1 | 13 | 8  |
| 1838 | presurvey_arm_1 | 3 | 210 | 3 | 1 | 14 | 8  |
| 1839 | presurvey_arm_1 | 3 | 210 | 3 | 1 | 13 | 99 |
| 1840 | presurvey_arm_1 | 1 | 211 | 3 | 1 | 12 | 6  |

|      |                 |   |     |   |   |    |    |
|------|-----------------|---|-----|---|---|----|----|
| 1841 | presurvey_arm_1 | 1 | 211 | 3 | 1 | 11 | 6  |
| 1842 | presurvey_arm_1 | 1 | 211 | 3 | 1 | 12 | 6  |
| 1843 | presurvey_arm_1 | 1 | 211 | 3 | 1 | 12 | 6  |
| 1844 | presurvey_arm_1 | 1 | 211 | 4 | 1 | 11 | 6  |
| 1845 | presurvey_arm_1 | 1 | 211 | 3 | 1 | 11 | 6  |
| 1846 | presurvey_arm_1 | 1 | 211 | 3 | 1 | 11 | 6  |
| 1847 | presurvey_arm_1 | 1 | 211 | 3 | 1 | 12 | 6  |
| 1848 | presurvey_arm_1 | 1 | 211 | 3 | 1 | 12 | 6  |
| 1849 | presurvey_arm_1 | 1 | 212 | 3 | 1 | 12 | 6  |
| 1850 | presurvey_arm_1 | 1 | 212 | 3 | 1 | 12 | 6  |
| 1851 | presurvey_arm_1 | 1 | 212 | 3 | 1 | 11 | 6  |
| 1852 | presurvey_arm_1 | 1 | 212 | 3 | 1 | 12 | 6  |
| 1853 | presurvey_arm_1 | 1 | 212 | 4 | 1 | 12 | 6  |
| 1854 | presurvey_arm_1 | 1 | 212 | 3 | 1 | 11 | 6  |
| 1855 | presurvey_arm_1 | 1 | 212 | 3 | 1 | 12 | 99 |
| 1856 | presurvey_arm_1 | 1 | 212 | 3 | 1 | 11 | 6  |
| 1857 | presurvey_arm_1 | 1 | 212 | 3 | 1 | 12 | 6  |
| 1858 | presurvey_arm_1 | 1 | 212 | 4 | 1 | 13 | 6  |
| 1859 | presurvey_arm_1 | 1 | 212 | 3 | 1 | 11 | 6  |
| 1860 | presurvey_arm_1 | 1 | 212 | 3 | 1 | 12 | 6  |
| 1861 | presurvey_arm_1 | 1 | 212 | 3 | 1 | 11 | 6  |
| 1862 | presurvey_arm_1 | 1 | 212 | 3 | 1 | 11 | 6  |
| 1863 | presurvey_arm_1 | 1 | 212 | 3 | 1 | 11 | 6  |
| 1864 | presurvey_arm_1 | 1 | 212 | 4 | 1 | 12 | 6  |
| 1865 | presurvey_arm_1 | 1 | 212 | 3 | 1 | 12 | 6  |
| 1866 | presurvey_arm_1 | 1 | 212 | 4 | 1 | 12 | 6  |
| 1867 | presurvey_arm_1 | 1 | 212 | 3 | 1 | 11 | 6  |
| 1868 | presurvey_arm_1 | 1 | 212 | 3 | 1 | 12 | 6  |
| 1869 | presurvey_arm_1 | 1 | 212 | 3 | 1 | 12 | 6  |
| 1870 | presurvey_arm_1 | 1 | 212 | 3 | 1 | 11 | 6  |
| 1871 | presurvey_arm_1 | 1 | 212 | 4 | 1 | 11 | 6  |
| 1872 | presurvey_arm_1 | 2 | 213 | 3 | 1 | 13 | 7  |
| 1873 | presurvey_arm_1 | 2 | 213 | 3 | 1 | 12 | 7  |
| 1874 | presurvey_arm_1 | 2 | 213 | 3 | 1 | 12 | 7  |
| 1875 | presurvey_arm_1 | 2 | 213 | 3 | 1 | 13 | 7  |
| 1876 | presurvey_arm_1 | 2 | 213 | 3 | 1 | 13 | 7  |
| 1877 | presurvey_arm_1 | 2 | 213 | 4 | 1 | 13 | 7  |
| 1878 | presurvey_arm_1 | 2 | 213 | 3 | 1 | 13 | 7  |
| 1879 | presurvey_arm_1 | 2 | 213 | 4 | 1 | 12 | 7  |
| 1880 | presurvey_arm_1 | 2 | 213 | 3 | 1 | 13 | 7  |
| 1881 | presurvey_arm_1 | 2 | 213 | 3 | 1 | 12 | 7  |
| 1882 | presurvey_arm_1 | 2 | 213 | 3 | 1 | 13 | 7  |
| 1883 | presurvey_arm_1 | 2 | 214 | 3 | 1 | 14 | 7  |
| 1884 | presurvey_arm_1 | 2 | 214 | 3 | 1 | 13 | 7  |
| 1885 | presurvey_arm_1 | 2 | 214 | 3 | 1 | 13 | 7  |
| 1886 | presurvey_arm_1 | 2 | 214 | 3 | 1 | 13 | 7  |
| 1887 | presurvey_arm_1 | 2 | 214 | 4 | 1 | 12 | 7  |
| 1888 | presurvey_arm_1 | 2 | 214 | 3 | 1 | 13 | 7  |

|      |                 |   |     |   |   |    |    |
|------|-----------------|---|-----|---|---|----|----|
| 1889 | presurvey_arm_1 | 2 | 214 | 3 | 1 | 12 | 7  |
| 1890 | presurvey_arm_1 | 2 | 214 | 3 | 1 | 12 | 7  |
| 1891 | presurvey_arm_1 | 2 | 214 | 3 | 1 | 13 | 7  |
| 1892 | presurvey_arm_1 | 2 | 214 | 3 | 1 | 12 | 7  |
| 1893 | presurvey_arm_1 | 2 | 214 | 3 | 1 | 13 | 7  |
| 1894 | presurvey_arm_1 | 2 | 214 | 3 | 1 | 12 | 7  |
| 1895 | presurvey_arm_1 | 2 | 214 | 4 | 1 | 12 | 7  |
| 1896 | presurvey_arm_1 | 2 | 214 | 3 | 1 | 12 | 7  |
| 1897 | presurvey_arm_1 | 2 | 214 | 3 | 1 | 12 | 7  |
| 1898 | presurvey_arm_1 | 2 | 214 | 3 | 1 | 13 | 7  |
| 1899 | presurvey_arm_1 | 2 | 214 | 3 | 1 | 16 | 6  |
| 1900 | presurvey_arm_1 | 2 | 214 | 3 | 1 | 12 | 7  |
| 1901 | presurvey_arm_1 | 2 | 214 | 3 | 1 | 13 | 7  |
| 1902 | presurvey_arm_1 | 2 | 214 | 3 | 1 | 12 | 7  |
| 1903 | presurvey_arm_1 | 3 | 215 | 4 | 1 | 13 | 8  |
| 1904 | presurvey_arm_1 | 3 | 215 | 3 | 1 | 14 | 8  |
| 1905 | presurvey_arm_1 | 3 | 215 | 3 | 1 | 14 | 8  |
| 1906 | presurvey_arm_1 | 3 | 215 | 4 | 1 | 14 | 8  |
| 1907 | presurvey_arm_1 | 3 | 215 | 3 | 1 | 14 | 8  |
| 1908 | presurvey_arm_1 | 3 | 215 | 3 | 1 | 14 | 8  |
| 1909 | presurvey_arm_1 | 3 | 215 | 3 | 1 | 14 | 8  |
| 1910 | presurvey_arm_1 | 3 | 215 | 3 | 1 | 14 | 8  |
| 1911 | presurvey_arm_1 | 3 | 215 | 3 | 1 | 14 | 8  |
| 1912 | presurvey_arm_1 | 3 | 215 | 3 | 1 | 13 | 8  |
| 1913 | presurvey_arm_1 | 3 | 215 | 3 | 1 | 13 | 8  |
| 1914 | presurvey_arm_1 | 3 | 215 | 3 | 1 | 13 | 8  |
| 1915 | presurvey_arm_1 | 3 | 215 | 3 | 1 | 15 | 8  |
| 1916 | presurvey_arm_1 | 3 | 215 | 3 | 1 | 14 | 8  |
| 1917 | presurvey_arm_1 | 3 | 216 | 3 | 1 | 13 | 8  |
| 1918 | presurvey_arm_1 | 3 | 216 | 3 | 1 | 14 | 8  |
| 1919 | presurvey_arm_1 | 3 | 216 | 3 | 1 | 14 | 8  |
| 1920 | presurvey_arm_1 | 3 | 216 | 3 | 1 | 14 | 8  |
| 1921 | presurvey_arm_1 | 3 | 216 | 3 | 1 | 14 | 8  |
| 1922 | presurvey_arm_1 | 3 | 126 | 3 | 1 | 13 | 8  |
| 1923 | presurvey_arm_1 | 3 | 216 | 3 | 1 | 14 | 8  |
| 1924 | presurvey_arm_1 | 3 | 216 | 3 | 1 | 14 | 8  |
| 1925 | presurvey_arm_1 | 3 | 216 | 3 | 1 | 14 | 8  |
| 1926 | presurvey_arm_1 | 3 | 216 | 3 | 1 | 14 | 8  |
| 1927 | presurvey_arm_1 | 3 | 216 | 3 | 1 | 14 | 8  |
| 1928 | presurvey_arm_1 | 3 | 216 | 4 | 1 | 13 | 8  |
| 1929 | presurvey_arm_1 | 3 | 216 | 3 | 1 | 14 | 8  |
| 1930 | presurvey_arm_1 | 3 | 216 | 3 | 1 | 13 | 8  |
| 1931 | presurvey_arm_1 | 3 | 216 | 3 | 1 | 13 | 8  |
| 1932 | presurvey_arm_1 | 3 | 216 | 3 | 1 | 14 | 8  |
| 1933 | presurvey_arm_1 | 3 | 216 | 3 | 1 | 14 | 8  |
| 1934 | presurvey_arm_1 | 3 | 216 | 3 | 1 | 13 | 99 |
| 1935 | presurvey_arm_1 | 3 | 216 | 3 | 1 | 14 | 8  |
| 1936 | presurvey_arm_1 | 3 | 216 | 3 | 1 | 14 | 8  |



|      |                 |   |     |   |   |    |    |
|------|-----------------|---|-----|---|---|----|----|
| 1937 | presurvey_arm_1 | 3 | 216 | 3 | 1 | 14 | 8  |
| 1938 | presurvey_arm_1 | 3 | 216 | 3 | 1 | 13 | 8  |
| 1939 | presurvey_arm_1 | 3 | 216 | 4 | 1 | 14 | 8  |
| 1940 | presurvey_arm_1 | 3 | 216 | 3 | 1 | 13 | 8  |
| 1941 | presurvey_arm_1 | 3 | 216 | 3 | 1 | 14 | 99 |
| 1942 | presurvey_arm_1 | 3 | 216 | 4 | 1 | 14 | 8  |
| 1943 | presurvey_arm_1 | 3 | 216 | 3 | 1 | 13 | 8  |
| 1944 | presurvey_arm_1 | 3 | 216 | 3 | 1 | 15 | 8  |
| 1945 | presurvey_arm_1 | 3 | 216 | 4 | 1 | 14 | 8  |
| 1946 | presurvey_arm_1 | 3 | 216 | 4 | 1 | 13 | 8  |
| 1947 | presurvey_arm_1 | 1 | 223 | 4 | 1 | 12 | 6  |
| 1948 | presurvey_arm_1 | 1 | 223 | 3 | 1 | 12 | 6  |
| 1949 | presurvey_arm_1 | 1 | 223 | 3 | 1 | 11 | 6  |
| 1950 | presurvey_arm_1 | 1 | 223 | 3 | 1 | 13 | 6  |
| 1951 | presurvey_arm_1 | 1 | 223 | 4 | 1 | 12 | 6  |
| 1952 | presurvey_arm_1 | 1 | 223 | 3 | 1 | 11 | 6  |
| 1953 | presurvey_arm_1 | 1 | 223 | 3 | 1 | 12 | 6  |
| 1954 | presurvey_arm_1 | 1 | 223 | 4 | 1 | 12 | 6  |
| 1955 | presurvey_arm_1 | 1 | 223 | 3 | 1 | 12 | 6  |
| 1956 | presurvey_arm_1 | 1 | 223 | 4 | 1 | 12 | 6  |
| 1957 | presurvey_arm_1 | 1 | 223 | 4 | 1 | 11 | 6  |
| 1958 | presurvey_arm_1 | 1 | 224 | 4 | 1 | 12 | 6  |
| 1959 | presurvey_arm_1 | 1 | 224 | 4 | 1 | 11 | 6  |
| 1960 | presurvey_arm_1 | 1 | 224 | 3 | 1 | 12 | 6  |
| 1961 | presurvey_arm_1 | 1 | 224 | 4 | 1 | 11 | 6  |
| 1962 | presurvey_arm_1 | 1 | 224 | 3 | 1 | 13 | 6  |
| 1963 | presurvey_arm_1 | 1 | 224 | 3 | 1 | 12 | 6  |
| 1964 | presurvey_arm_1 | 1 | 224 | 3 | 1 | 12 | 6  |
| 1965 | presurvey_arm_1 | 1 | 224 | 4 | 1 | 12 | 6  |
| 1966 | presurvey_arm_1 | 1 | 224 | 3 | 1 | 11 | 6  |
| 1967 | presurvey_arm_1 | 1 | 224 | 4 | 1 | 12 | 6  |
| 1968 | presurvey_arm_1 | 1 | 224 | 4 | 1 | 11 | 6  |
| 1969 | presurvey_arm_1 | 1 | 224 | 3 | 1 | 12 | 6  |
| 1970 | presurvey_arm_1 | 1 | 224 | 4 | 1 | 12 | 6  |
| 1971 | presurvey_arm_1 | 1 | 224 | 3 | 1 | 12 | 6  |
| 1972 | presurvey_arm_1 | 1 | 224 | 3 | 1 | 11 | 6  |
| 1973 | presurvey_arm_1 | 1 | 224 | 4 | 1 | 12 | 6  |
| 1974 | presurvey_arm_1 | 1 | 224 | 4 | 1 | 12 | 6  |
| 1975 | presurvey_arm_1 | 1 | 224 | 3 | 1 | 11 | 6  |
| 1976 | presurvey_arm_1 | 1 | 224 | 4 | 1 | 11 | 6  |
| 1977 | presurvey_arm_1 | 1 | 224 | 4 | 1 | 12 | 6  |
| 1978 | presurvey_arm_1 | 1 | 224 | 3 | 1 | 12 | 6  |
| 1979 | presurvey_arm_1 | 1 | 224 | 4 | 1 | 12 | 6  |
| 1980 | presurvey_arm_1 | 1 | 224 | 3 | 1 | 12 | 6  |
| 1981 | presurvey_arm_1 | 1 | 224 | 3 | 1 | 12 | 6  |
| 1982 | presurvey_arm_1 | 1 | 224 | 3 | 1 | 11 | 6  |
| 1983 | presurvey_arm_1 | 1 | 224 | 3 | 1 | 12 | 6  |
| 1984 | presurvey_arm_1 | 1 | 224 | 3 | 1 | 12 | 6  |

|      |                 |   |     |   |   |    |   |
|------|-----------------|---|-----|---|---|----|---|
| 1985 | presurvey_arm_1 | 2 | 225 | 3 | 1 | 13 | 7 |
| 1986 | presurvey_arm_1 | 2 | 225 | 3 | 1 | 13 | 7 |
| 1987 | presurvey_arm_1 | 2 | 225 | 4 | 1 | 13 | 7 |
| 1988 | presurvey_arm_1 | 2 | 225 | 3 | 1 | 13 | 7 |
| 1989 | presurvey_arm_1 | 2 | 225 | 4 | 1 | 12 | 7 |
| 1990 | presurvey_arm_1 | 2 | 225 | 4 | 1 | 12 | 7 |
| 1991 | presurvey_arm_1 | 2 | 225 | 4 | 1 | 13 | 7 |
| 1992 | presurvey_arm_1 | 2 | 225 | 4 | 1 | 12 | 7 |
| 1993 | presurvey_arm_1 | 2 | 225 | 4 | 1 | 14 | 7 |
| 1994 | presurvey_arm_1 | 2 | 225 | 4 | 1 | 13 | 7 |
| 1995 | presurvey_arm_1 | 2 | 225 | 3 | 1 | 13 | 7 |
| 1996 | presurvey_arm_1 | 2 | 225 | 4 | 1 | 12 | 7 |
| 1997 | presurvey_arm_1 | 2 | 225 | 3 | 1 | 13 | 7 |
| 1998 | presurvey_arm_1 | 2 | 225 | 4 | 1 | 13 | 7 |
| 1999 | presurvey_arm_1 | 2 | 225 | 4 | 1 | 13 | 7 |
| 2000 | presurvey_arm_1 | 2 | 226 | 4 | 1 | 13 | 7 |
| 2001 | presurvey_arm_1 | 2 | 226 | 3 | 1 | 14 | 7 |
| 2002 | presurvey_arm_1 | 2 | 226 | 3 | 1 | 12 | 7 |
| 2003 | presurvey_arm_1 | 2 | 226 | 3 | 1 | 13 | 7 |
| 2004 | presurvey_arm_1 | 2 | 226 | 3 | 1 | 13 | 7 |
| 2005 | presurvey_arm_1 | 2 | 226 | 4 | 1 | 12 | 7 |
| 2006 | presurvey_arm_1 | 2 | 226 | 3 | 1 | 13 | 7 |
| 2007 | presurvey_arm_1 | 2 | 226 | 3 | 1 | 13 | 7 |
| 2008 | presurvey_arm_1 | 2 | 226 | 3 | 1 | 13 | 7 |
| 2009 | presurvey_arm_1 | 2 | 226 | 4 | 1 | 13 | 7 |
| 2010 | presurvey_arm_1 | 2 | 226 | 4 | 1 | 14 | 7 |
| 2011 | presurvey_arm_1 | 2 | 226 | 3 | 1 | 13 | 7 |
| 2012 | presurvey_arm_1 | 2 | 226 | 3 | 1 | 13 | 7 |
| 2013 | presurvey_arm_1 | 2 | 226 | 4 | 1 | 12 | 7 |
| 2014 | presurvey_arm_1 | 2 | 226 | 3 | 1 | 12 | 7 |
| 2015 | presurvey_arm_1 | 2 | 226 | 3 | 1 | 13 | 7 |
| 2016 | presurvey_arm_1 | 2 | 226 | 4 | 1 | 13 | 7 |
| 2017 | presurvey_arm_1 | 2 | 226 | 4 | 1 | 13 | 7 |
| 2018 | presurvey_arm_1 | 2 | 226 | 3 | 1 | 13 | 7 |
| 2019 | presurvey_arm_1 | 2 | 226 | 3 | 1 | 13 | 7 |
| 2020 | presurvey_arm_1 | 3 | 227 | 4 | 1 | 13 | 8 |
| 2021 | presurvey_arm_1 | 3 | 227 | 3 | 1 | 14 | 8 |
| 2022 | presurvey_arm_1 | 3 | 227 | 4 | 1 | 14 | 8 |
| 2023 | presurvey_arm_1 | 3 | 227 | 3 | 1 | 14 | 8 |
| 2024 | presurvey_arm_1 | 3 | 227 | 3 | 1 | 14 | 8 |
| 2025 | presurvey_arm_1 | 3 | 227 | 3 | 1 | 14 | 8 |
| 2026 | presurvey_arm_1 | 3 | 227 | 3 | 1 | 15 | 8 |
| 2027 | presurvey_arm_1 | 3 | 227 | 3 | 1 | 14 | 8 |
| 2028 | presurvey_arm_1 | 3 | 227 | 3 | 1 | 14 | 8 |
| 2029 | presurvey_arm_1 | 3 | 227 | 3 | 1 | 14 | 8 |
| 2030 | presurvey_arm_1 | 3 | 227 | 3 | 1 | 13 | 8 |
| 2031 | presurvey_arm_1 | 3 | 227 | 4 | 1 | 14 | 8 |
| 2032 | presurvey_arm_1 | 3 | 227 | 4 | 1 | 14 | 8 |

|      |                 |   |     |   |   |    |    |
|------|-----------------|---|-----|---|---|----|----|
| 2033 | presurvey_arm_1 | 3 | 227 | 4 | 1 | 14 | 8  |
| 2034 | presurvey_arm_1 | 3 | 228 | 4 | 1 | 14 | 8  |
| 2035 | presurvey_arm_1 | 3 | 228 | 3 | 1 | 13 | 8  |
| 2036 | presurvey_arm_1 | 3 | 228 | 4 | 1 | 14 | 8  |
| 2037 | presurvey_arm_1 | 3 | 228 | 4 | 1 | 13 | 8  |
| 2038 | presurvey_arm_1 | 3 | 228 | 4 | 1 | 14 | 8  |
| 2039 | presurvey_arm_1 | 3 | 228 | 4 | 1 | 14 | 8  |
| 2040 | presurvey_arm_1 | 3 | 228 | 4 | 1 | 14 | 8  |
| 2041 | presurvey_arm_1 | 3 | 228 | 4 | 1 | 14 | 8  |
| 2042 | presurvey_arm_1 | 3 | 228 | 3 | 1 | 14 | 8  |
| 2043 | presurvey_arm_1 | 3 | 228 | 3 | 1 | 14 | 8  |
| 2044 | presurvey_arm_1 | 3 | 228 | 3 | 1 | 14 | 8  |
| 2045 | presurvey_arm_1 | 3 | 228 | 4 | 1 | 14 | 8  |
| 2046 | presurvey_arm_1 | 3 | 228 | 4 | 1 | 13 | 8  |
| 2047 | presurvey_arm_1 | 3 | 228 | 4 | 1 | 14 | 8  |
| 2048 | presurvey_arm_1 | 3 | 228 | 4 | 1 | 14 | 8  |
| 2049 | presurvey_arm_1 | 3 | 228 | 4 | 1 | 13 | 8  |
| 2050 | presurvey_arm_1 | 3 | 228 | 3 | 1 | 13 | 8  |
| 2051 | presurvey_arm_1 | 3 | 228 | 4 | 1 | 14 | 8  |
| 2052 | presurvey_arm_1 | 3 | 228 | 3 | 1 | 14 | 8  |
| 2053 | presurvey_arm_1 | 3 | 228 | 3 | 1 | 14 | 8  |
| 2054 | presurvey_arm_1 | 3 | 228 | 3 | 1 | 14 | 8  |
| 2055 | presurvey_arm_1 | 3 | 228 | 3 | 1 | 14 | 99 |
| 2056 | presurvey_arm_1 | 3 | 228 | 4 | 1 | 15 | 8  |
| 2057 | presurvey_arm_1 | 3 | 228 | 3 | 1 | 14 | 8  |
| 2058 | presurvey_arm_1 | 3 | 228 | 3 | 1 | 14 | 8  |
| 2059 | presurvey_arm_1 | 3 | 228 | 4 | 1 | 13 | 8  |
| 2060 | presurvey_arm_1 | 3 | 228 | 4 | 1 | 13 | 8  |
| 2417 | presurvey_arm_1 | 1 | 120 | 1 | 1 | 11 | 6  |
| 2418 | presurvey_arm_1 | 1 | 120 | 2 | 1 | 11 | 6  |
| 2419 | presurvey_arm_1 | 1 | 120 | 2 | 1 | 11 | 6  |
| 2420 | presurvey_arm_1 | 1 | 120 | 2 | 1 | 11 | 6  |
| 2421 | presurvey_arm_1 | 1 | 120 | 2 | 1 | 11 | 6  |
| 2422 | presurvey_arm_1 | 1 | 120 | 2 | 1 | 11 | 6  |
| 2423 | presurvey_arm_1 | 1 | 120 | 2 | 1 | 11 | 6  |
| 2424 | presurvey_arm_1 | 1 | 120 | 2 | 1 | 11 | 6  |
| 2425 | presurvey_arm_1 | 1 | 120 | 2 | 1 | 11 | 6  |
| 2426 | presurvey_arm_1 | 1 | 120 | 1 | 1 | 11 | 6  |
| 2427 | presurvey_arm_1 | 1 | 120 | 2 | 1 | 11 | 6  |
| 2428 | presurvey_arm_1 | 1 | 120 | 2 | 1 | 11 | 6  |
| 2429 | presurvey_arm_1 | 1 | 120 | 2 | 1 | 11 | 6  |
| 2430 | presurvey_arm_1 | 1 | 120 | 1 | 1 | 11 | 6  |
| 2431 | presurvey_arm_1 | 1 | 120 | 2 | 1 | 11 | 6  |
| 2432 | presurvey_arm_1 | 1 | 121 | 2 | 1 | 11 | 6  |
| 2433 | presurvey_arm_1 | 1 | 121 | 1 | 1 | 11 | 6  |
| 2434 | presurvey_arm_1 | 1 | 121 | 2 | 1 | 11 | 6  |
| 2435 | presurvey_arm_1 | 1 | 121 | 2 | 1 | 11 | 6  |
| 2436 | presurvey_arm_1 | 1 | 121 | 2 | 1 | 12 | 6  |

|      |                 |   |     |   |   |    |   |
|------|-----------------|---|-----|---|---|----|---|
| 2437 | presurvey_arm_1 | 1 | 121 | 2 | 1 | 11 | 6 |
| 2438 | presurvey_arm_1 | 1 | 121 | 2 | 1 | 11 | 6 |
| 2439 | presurvey_arm_1 | 1 | 121 | 2 | 1 | 12 | 6 |
| 2440 | presurvey_arm_1 | 1 | 121 | 2 | 1 | 11 | 6 |
| 2441 | presurvey_arm_1 | 1 | 121 | 2 | 1 | 11 | 6 |
| 2442 | presurvey_arm_1 | 1 | 121 | 2 | 1 | 11 | 6 |
| 2443 | presurvey_arm_1 | 1 | 121 | 2 | 1 | 11 | 6 |
| 2444 | presurvey_arm_1 | 1 | 121 | 2 | 1 | 11 | 6 |
| 2445 | presurvey_arm_1 | 1 | 121 | 2 | 1 | 12 | 6 |
| 2446 | presurvey_arm_1 | 1 | 121 | 2 | 1 | 11 | 6 |
| 2447 | presurvey_arm_1 | 1 | 121 | 2 | 1 | 11 | 6 |
| 2448 | presurvey_arm_1 | 1 | 121 | 1 | 1 | 11 | 6 |
| 2449 | presurvey_arm_1 | 1 | 121 | 2 | 1 | 10 | 7 |
| 2450 | presurvey_arm_1 | 1 | 121 | 2 | 1 | 11 | 6 |
| 2451 | presurvey_arm_1 | 1 | 121 | 2 | 1 | 11 | 6 |
| 2452 | presurvey_arm_1 | 1 | 121 | 2 | 1 | 11 | 6 |
| 2453 | presurvey_arm_1 | 1 | 121 | 2 | 1 | 12 | 6 |
| 2454 | presurvey_arm_1 | 1 | 121 | 2 | 1 | 11 | 6 |
| 2455 | presurvey_arm_1 | 1 | 121 | 2 | 1 | 12 | 6 |
| 2456 | presurvey_arm_1 | 2 | 122 | 2 | 1 | 12 | 7 |
| 2457 | presurvey_arm_1 | 2 | 122 | 2 | 1 | 11 | 7 |
| 2458 | presurvey_arm_1 | 2 | 122 | 2 | 1 | 12 | 7 |
| 2459 | presurvey_arm_1 | 2 | 122 | 2 | 1 | 12 | 7 |
| 2460 | presurvey_arm_1 | 2 | 122 | 2 | 1 | 12 | 7 |
| 2461 | presurvey_arm_1 | 2 | 122 | 2 | 1 | 13 | 7 |
| 2462 | presurvey_arm_1 | 2 | 122 | 2 | 1 | 12 | 7 |
| 2463 | presurvey_arm_1 | 2 | 122 | 2 | 1 | 12 | 7 |
| 2464 | presurvey_arm_1 | 2 | 122 | 2 | 1 | 12 | 7 |
| 2465 | presurvey_arm_1 | 2 | 122 | 2 | 1 | 12 | 7 |
| 2466 | presurvey_arm_1 | 2 | 122 | 2 | 1 | 12 | 7 |
| 2467 | presurvey_arm_1 | 2 | 122 | 2 | 1 | 12 | 7 |
| 2468 | presurvey_arm_1 | 2 | 122 | 2 | 1 | 13 | 7 |
| 2469 | presurvey_arm_1 | 2 | 122 | 2 | 1 | 12 | 7 |
| 2470 | presurvey_arm_1 | 2 | 122 | 2 | 1 | 13 | 7 |
| 2471 | presurvey_arm_1 | 2 | 122 | 2 | 1 | 13 | 7 |
| 2472 | presurvey_arm_1 | 2 | 122 | 2 | 1 | 12 | 7 |
| 2473 | presurvey_arm_1 | 2 | 122 | 2 | 1 | 13 | 7 |
| 2474 | presurvey_arm_1 | 2 | 122 | 2 | 1 | 13 | 7 |
| 2475 | presurvey_arm_1 | 2 | 123 | 2 | 1 | 12 | 7 |
| 2476 | presurvey_arm_1 | 2 | 123 | 2 | 1 | 12 | 7 |
| 2477 | presurvey_arm_1 | 2 | 123 | 2 | 1 | 12 | 7 |
| 2478 | presurvey_arm_1 | 2 | 123 | 2 | 1 | 12 | 7 |
| 2479 | presurvey_arm_1 | 2 | 123 | 2 | 1 | 12 | 7 |
| 2480 | presurvey_arm_1 | 2 | 123 | 2 | 1 | 12 | 7 |
| 2481 | presurvey_arm_1 | 2 | 123 | 2 | 1 | 12 | 7 |
| 2482 | presurvey_arm_1 | 2 | 123 | 1 | 1 | 13 | 7 |
| 2483 | presurvey_arm_1 | 2 | 123 | 2 | 1 | 12 | 7 |
| 2484 | presurvey_arm_1 | 2 | 123 | 1 | 1 | 12 | 7 |

|      |                 |   |     |   |   |    |   |
|------|-----------------|---|-----|---|---|----|---|
| 2485 | presurvey_arm_1 | 2 | 123 | 2 | 1 | 12 | 7 |
| 2486 | presurvey_arm_1 | 2 | 123 | 2 | 1 | 12 | 7 |
| 2487 | presurvey_arm_1 | 2 | 123 | 2 | 1 | 13 | 7 |
| 2488 | presurvey_arm_1 | 2 | 123 | 2 | 1 | 12 | 7 |
| 2489 | presurvey_arm_1 | 2 | 123 | 2 | 1 | 12 | 7 |
| 2490 | presurvey_arm_1 | 2 | 123 | 2 | 1 | 12 | 7 |
| 2491 | presurvey_arm_1 | 2 | 123 | 2 | 1 | 12 | 7 |
| 2492 | presurvey_arm_1 | 2 | 123 | 2 | 1 | 12 | 7 |
| 2493 | presurvey_arm_1 | 2 | 123 | 2 | 1 | 12 | 7 |
| 2494 | presurvey_arm_1 | 2 | 123 | 1 | 1 | 13 | 7 |
| 2495 | presurvey_arm_1 | 2 | 123 | 2 | 1 | 13 | 7 |
| 2496 | presurvey_arm_1 | 3 | 124 | 2 | 1 | 13 | 8 |
| 2497 | presurvey_arm_1 | 3 | 124 | 2 | 1 | 13 | 8 |
| 2498 | presurvey_arm_1 | 3 | 124 | 2 | 1 | 14 | 8 |
| 2499 | presurvey_arm_1 | 3 | 124 | 2 | 1 | 13 | 8 |
| 2500 | presurvey_arm_1 | 3 | 124 | 2 | 1 | 13 | 8 |
| 2501 | presurvey_arm_1 | 3 | 124 | 2 | 1 | 14 | 8 |
| 2502 | presurvey_arm_1 | 3 | 124 | 1 | 1 | 13 | 8 |
| 2503 | presurvey_arm_1 | 3 | 124 | 2 | 1 | 13 | 8 |
| 2504 | presurvey_arm_1 | 3 | 124 | 2 | 1 | 13 | 8 |
| 2505 | presurvey_arm_1 | 3 | 124 | 1 | 1 | 13 | 8 |
| 2506 | presurvey_arm_1 | 3 | 124 | 2 | 1 | 13 | 8 |
| 2507 | presurvey_arm_1 | 3 | 124 | 2 | 1 | 13 | 8 |
| 2508 | presurvey_arm_1 | 3 | 124 | 1 | 1 | 13 | 8 |
| 2509 | presurvey_arm_1 | 3 | 124 | 2 | 1 | 14 | 8 |
| 2510 | presurvey_arm_1 | 3 | 124 | 2 | 1 | 13 | 8 |
| 2511 | presurvey_arm_1 | 3 | 124 | 2 | 1 | 15 | 8 |
| 2512 | presurvey_arm_1 | 3 | 125 | 2 | 1 | 14 | 8 |
| 2513 | presurvey_arm_1 | 3 | 125 | 2 | 1 | 13 | 8 |
| 2514 | presurvey_arm_1 | 3 | 125 | 2 | 1 | 13 | 8 |
| 2515 | presurvey_arm_1 | 3 | 125 | 2 | 1 | 13 | 8 |
| 2516 | presurvey_arm_1 | 3 | 125 | 2 | 1 | 13 | 8 |
| 2517 | presurvey_arm_1 | 3 | 125 | 2 | 1 | 13 | 8 |
| 2518 | presurvey_arm_1 | 3 | 125 | 2 | 1 | 14 | 8 |
| 2519 | presurvey_arm_1 | 3 | 125 | 2 | 1 | 13 | 8 |
| 2520 | presurvey_arm_1 | 3 | 125 | 2 | 1 | 14 | 8 |
| 2521 | presurvey_arm_1 | 3 | 125 | 2 | 1 | 13 | 8 |
| 2522 | presurvey_arm_1 | 3 | 125 | 2 | 1 | 14 | 8 |
| 2523 | presurvey_arm_1 | 3 | 125 | 2 | 1 | 13 | 8 |
| 2524 | presurvey_arm_1 | 3 | 125 | 2 | 1 | 13 | 8 |
| 2525 | presurvey_arm_1 | 3 | 125 | 2 | 1 | 13 | 8 |
| 2526 | presurvey_arm_1 | 3 | 125 | 2 | 1 | 14 | 8 |
| 2527 | presurvey_arm_1 | 3 | 125 | 2 | 1 | 13 | 8 |
| 2528 | presurvey_arm_1 | 3 | 125 | 2 | 1 | 13 | 8 |
| 2529 | presurvey_arm_1 | 3 | 125 | 2 | 1 | 13 | 8 |
| 2530 | presurvey_arm_1 | 3 | 125 | 2 | 1 | 14 | 8 |
| 2531 | presurvey_arm_1 | 3 | 125 | 2 | 1 | 13 | 8 |
| 2532 | presurvey_arm_1 | 3 | 125 | 2 | 1 | 13 | 8 |

|      |                 |   |     |   |   |    |   |
|------|-----------------|---|-----|---|---|----|---|
| 2533 | presurvey_arm_1 | 1 | 130 | 2 | 1 | 11 | 6 |
| 2534 | presurvey_arm_1 | 1 | 130 | 2 | 1 | 11 | 6 |
| 2535 | presurvey_arm_1 | 1 | 130 | 2 | 1 | 11 | 6 |
| 2536 | presurvey_arm_1 | 1 | 130 | 2 | 1 | 11 | 6 |
| 2537 | presurvey_arm_1 | 1 | 130 | 2 | 1 | 11 | 6 |
| 2538 | presurvey_arm_1 | 1 | 130 | 2 | 1 | 11 | 6 |
| 2539 | presurvey_arm_1 | 1 | 130 | 2 | 1 | 12 | 6 |
| 2540 | presurvey_arm_1 | 1 | 130 | 2 | 1 | 11 | 6 |
| 2541 | presurvey_arm_1 | 1 | 130 | 2 | 1 | 11 | 6 |
| 2542 | presurvey_arm_1 | 1 | 130 | 2 | 1 | 12 | 6 |
| 2543 | presurvey_arm_1 | 1 | 130 | 2 | 1 | 11 | 6 |
| 2544 | presurvey_arm_1 | 1 | 131 | 2 | 1 | 11 | 6 |
| 2545 | presurvey_arm_1 | 1 | 131 | 2 | 1 | 11 | 6 |
| 2546 | presurvey_arm_1 | 1 | 131 | 2 | 1 | 11 | 6 |
| 2547 | presurvey_arm_1 | 1 | 131 | 2 | 1 | 11 | 6 |
| 2548 | presurvey_arm_1 | 1 | 131 | 2 | 1 | 11 | 6 |
| 2549 | presurvey_arm_1 | 1 | 131 | 2 | 1 | 12 | 6 |
| 2550 | presurvey_arm_1 | 1 | 131 | 2 | 1 | 11 | 6 |
| 2551 | presurvey_arm_1 | 1 | 131 | 2 | 1 | 11 | 6 |
| 2552 | presurvey_arm_1 | 1 | 131 | 2 | 1 | 10 | 6 |
| 2553 | presurvey_arm_1 | 1 | 131 | 2 | 1 | 12 | 6 |
| 2554 | presurvey_arm_1 | 1 | 131 | 2 | 1 | 10 | 6 |
| 2555 | presurvey_arm_1 | 1 | 131 | 2 | 1 | 12 | 6 |
| 2556 | presurvey_arm_1 | 1 | 131 | 2 | 1 | 11 | 6 |
| 2557 | presurvey_arm_1 | 1 | 131 | 2 | 1 | 11 | 6 |
| 2558 | presurvey_arm_1 | 1 | 131 | 2 | 1 | 11 | 6 |
| 2559 | presurvey_arm_1 | 1 | 131 | 2 | 1 | 11 | 6 |
| 2560 | presurvey_arm_1 | 1 | 131 | 2 | 1 | 11 | 6 |
| 2561 | presurvey_arm_1 | 1 | 131 | 2 | 1 | 11 | 6 |
| 2562 | presurvey_arm_1 | 1 | 131 | 2 | 1 | 12 | 6 |
| 2563 | presurvey_arm_1 | 1 | 131 | 2 | 1 | 12 | 6 |
| 2564 | presurvey_arm_1 | 1 | 131 | 2 | 1 | 11 | 6 |
| 2565 | presurvey_arm_1 | 1 | 131 | 2 | 1 | 11 | 6 |
| 2566 | presurvey_arm_1 | 1 | 131 | 2 | 1 | 11 | 6 |
| 2567 | presurvey_arm_1 | 1 | 131 | 2 | 1 | 11 | 6 |
| 2568 | presurvey_arm_1 | 1 | 131 | 2 | 1 | 11 | 6 |
| 2569 | presurvey_arm_1 | 1 | 131 | 2 | 1 | 11 | 6 |
| 2570 | presurvey_arm_1 | 2 | 132 | 1 | 1 | 12 | 7 |
| 2571 | presurvey_arm_1 | 2 | 132 | 2 | 1 | 12 | 7 |
| 2572 | presurvey_arm_1 | 2 | 132 | 2 | 1 | 12 | 7 |
| 2573 | presurvey_arm_1 | 2 | 132 | 2 | 1 | 13 | 7 |
| 2574 | presurvey_arm_1 | 2 | 132 | 2 | 1 | 12 | 7 |
| 2575 | presurvey_arm_1 | 2 | 132 | 2 | 1 | 12 | 7 |
| 2576 | presurvey_arm_1 | 2 | 132 | 2 | 1 | 12 | 7 |
| 2577 | presurvey_arm_1 | 2 | 132 | 2 | 1 | 14 | 7 |
| 2578 | presurvey_arm_1 | 2 | 132 | 2 | 1 | 12 | 7 |
| 2579 | presurvey_arm_1 | 2 | 132 | 2 | 1 | 12 | 7 |
| 2580 | presurvey_arm_1 | 2 | 132 | 2 | 1 | 11 | 7 |

|      |                 |   |     |   |   |    |   |
|------|-----------------|---|-----|---|---|----|---|
| 2581 | presurvey_arm_1 | 2 | 132 | 1 | 1 | 13 | 7 |
| 2582 | presurvey_arm_1 | 2 | 132 | 2 | 1 | 13 | 7 |
| 2583 | presurvey_arm_1 | 2 | 132 | 2 | 1 | 13 | 7 |
| 2584 | presurvey_arm_1 | 2 | 132 | 2 | 1 | 13 | 7 |
| 2585 | presurvey_arm_1 | 2 | 133 | 2 | 1 | 11 | 7 |
| 2586 | presurvey_arm_1 | 2 | 133 | 2 | 1 | 12 | 7 |
| 2587 | presurvey_arm_1 | 2 | 133 | 2 | 1 | 12 | 7 |
| 2588 | presurvey_arm_1 | 2 | 133 | 2 | 1 | 13 | 7 |
| 2589 | presurvey_arm_1 | 2 | 133 | 2 | 1 | 12 | 7 |
| 2590 | presurvey_arm_1 | 2 | 133 | 2 | 1 | 13 | 7 |
| 2591 | presurvey_arm_1 | 2 | 133 | 2 | 1 | 12 | 7 |
| 2592 | presurvey_arm_1 | 2 | 133 | 2 | 1 | 13 | 7 |
| 2593 | presurvey_arm_1 | 2 | 133 | 2 | 1 | 12 | 7 |
| 2594 | presurvey_arm_1 | 2 | 133 | 2 | 1 | 12 | 7 |
| 2595 | presurvey_arm_1 | 2 | 133 | 2 | 1 | 12 | 7 |
| 2596 | presurvey_arm_1 | 2 | 133 | 2 | 1 | 12 | 7 |
| 2597 | presurvey_arm_1 | 2 | 133 | 2 | 1 | 13 | 7 |
| 2598 | presurvey_arm_1 | 2 | 133 | 2 | 1 | 13 | 7 |
| 2599 | presurvey_arm_1 | 2 | 133 | 2 | 1 | 13 | 7 |
| 2600 | presurvey_arm_1 | 2 | 133 | 2 | 1 | 12 | 7 |
| 2601 | presurvey_arm_1 | 2 | 133 | 2 | 1 | 12 | 7 |
| 2602 | presurvey_arm_1 | 2 | 133 | 2 | 1 | 12 | 7 |
| 2603 | presurvey_arm_1 | 2 | 133 | 2 | 1 | 12 | 7 |
| 2604 | presurvey_arm_1 | 2 | 133 | 2 | 1 | 14 | 7 |
| 2605 | presurvey_arm_1 | 2 | 133 | 2 | 1 | 12 | 7 |
| 2606 | presurvey_arm_1 | 2 | 133 | 2 | 1 | 13 | 7 |
| 2607 | presurvey_arm_1 | 2 | 133 | 2 | 1 | 12 | 7 |
| 2608 | presurvey_arm_1 | 2 | 133 | 2 | 1 | 12 | 7 |
| 2609 | presurvey_arm_1 | 3 | 134 | 2 | 1 | 13 | 8 |
| 2610 | presurvey_arm_1 | 3 | 134 | 2 | 1 | 13 | 8 |
| 2611 | presurvey_arm_1 | 3 | 134 | 2 | 1 | 13 | 8 |
| 2612 | presurvey_arm_1 | 3 | 134 | 2 | 1 | 14 | 8 |
| 2613 | presurvey_arm_1 | 3 | 134 | 2 | 1 | 14 | 8 |
| 2614 | presurvey_arm_1 | 3 | 134 | 2 | 1 | 13 | 8 |
| 2615 | presurvey_arm_1 | 3 | 134 | 2 | 1 | 14 | 8 |
| 2616 | presurvey_arm_1 | 3 | 134 | 2 | 1 | 13 | 8 |
| 2617 | presurvey_arm_1 | 3 | 134 | 2 | 1 | 14 | 8 |
| 2618 | presurvey_arm_1 | 3 | 134 | 2 | 1 | 14 | 8 |
| 2619 | presurvey_arm_1 | 3 | 134 | 2 | 1 | 13 | 8 |
| 2620 | presurvey_arm_1 | 3 | 134 | 2 | 1 | 13 | 8 |
| 2621 | presurvey_arm_1 | 3 | 134 | 2 | 1 | 14 | 8 |
| 2622 | presurvey_arm_1 | 3 | 134 | 2 | 1 | 13 | 8 |
| 2623 | presurvey_arm_1 | 3 | 134 | 2 | 1 | 13 | 8 |
| 2624 | presurvey_arm_1 | 3 | 134 | 2 | 1 | 13 | 8 |
| 2625 | presurvey_arm_1 | 3 | 135 | 2 | 1 | 13 | 8 |
| 2626 | presurvey_arm_1 | 3 | 135 | 2 | 1 | 13 | 8 |
| 2627 | presurvey_arm_1 | 3 | 135 | 2 | 1 | 13 | 8 |
| 2628 | presurvey_arm_1 | 3 | 135 | 2 | 1 | 13 | 8 |

|      |                 |   |     |   |   |    |    |
|------|-----------------|---|-----|---|---|----|----|
| 2629 | presurvey_arm_1 | 3 | 135 | 2 | 1 | 13 | 8  |
| 2630 | presurvey_arm_1 | 3 | 135 | 2 | 1 | 14 | 8  |
| 2631 | presurvey_arm_1 | 3 | 135 | 2 | 1 | 13 | 8  |
| 2632 | presurvey_arm_1 | 3 | 135 | 1 | 1 | 13 | 8  |
| 2633 | presurvey_arm_1 | 3 | 135 | 2 | 1 | 13 | 8  |
| 2634 | presurvey_arm_1 | 3 | 135 | 2 | 1 | 13 | 8  |
| 2635 | presurvey_arm_1 | 3 | 135 | 2 | 1 | 13 | 8  |
| 2637 | presurvey_arm_1 | 3 | 135 | 2 | 1 | 13 | 8  |
| 2638 | presurvey_arm_1 | 3 | 135 | 2 | 1 | 13 | 8  |
| 2639 | presurvey_arm_1 | 3 | 135 | 2 | 1 | 13 | 8  |
| 2640 | presurvey_arm_1 | 3 | 135 | 2 | 1 | 13 | 8  |
| 2641 | presurvey_arm_1 | 3 | 135 | 2 | 1 | 13 | 8  |
| 2642 | presurvey_arm_1 | 3 | 135 | 2 | 1 | 13 | 8  |
| 2643 | presurvey_arm_1 | 3 | 135 | 2 | 1 | 13 | 8  |
| 2644 | presurvey_arm_1 | 3 | 135 | 2 | 1 | 14 | 8  |
| 2645 | presurvey_arm_1 | 3 | 135 | 2 | 1 | 13 | 8  |
| 2764 | presurvey_arm_1 | 1 | 130 | 2 | 1 | 11 | 6  |
| 2867 | presurvey_arm_1 | 1 | 142 | 2 | 1 | 12 | 6  |
| 2868 | presurvey_arm_1 | 1 | 142 | 2 | 1 | 11 | 6  |
| 2869 | presurvey_arm_1 | 1 | 142 | 2 | 1 | 12 | 6  |
| 2870 | presurvey_arm_1 | 1 | 142 | 2 | 1 | 13 | 6  |
| 2871 | presurvey_arm_1 | 1 | 142 | 2 | 1 | 11 | 6  |
| 2872 | presurvey_arm_1 | 1 | 142 | 2 | 1 | 12 | 6  |
| 2873 | presurvey_arm_1 | 1 | 142 | 2 | 1 | 12 | 6  |
| 2874 | presurvey_arm_1 | 1 | 142 | 1 | 1 | 12 | 6  |
| 2875 | presurvey_arm_1 | 1 | 142 | 2 | 1 | 11 | 99 |
| 2876 | presurvey_arm_1 | 1 | 142 | 2 | 1 | 12 | 6  |
| 2877 | presurvey_arm_1 | 1 | 142 | 2 | 1 | 12 | 6  |
| 2878 | presurvey_arm_1 | 1 | 142 | 2 | 1 | 12 | 6  |
| 2879 | presurvey_arm_1 | 1 | 142 | 2 | 1 | 11 | 6  |
| 2880 | presurvey_arm_1 | 1 | 142 | 2 | 1 | 12 | 6  |
| 2881 | presurvey_arm_1 | 1 | 143 | 2 | 1 | 11 | 6  |
| 2882 | presurvey_arm_1 | 1 | 143 | 2 | 1 | 12 | 6  |
| 2883 | presurvey_arm_1 | 1 | 143 | 2 | 1 | 11 | 6  |
| 2884 | presurvey_arm_1 | 1 | 143 | 2 | 1 | 12 | 6  |
| 2885 | presurvey_arm_1 | 1 | 143 | 2 | 1 | 12 | 6  |
| 2886 | presurvey_arm_1 | 1 | 143 | 2 | 1 | 12 | 6  |
| 2887 | presurvey_arm_1 | 1 | 143 | 2 | 1 | 11 | 99 |
| 2888 | presurvey_arm_1 | 1 | 143 | 2 | 1 | 11 | 6  |
| 2889 | presurvey_arm_1 | 1 | 143 | 2 | 1 | 11 | 6  |
| 2890 | presurvey_arm_1 | 1 | 143 | 2 | 1 | 12 | 6  |
| 2891 | presurvey_arm_1 | 1 | 143 | 2 | 1 | 11 | 6  |
| 2892 | presurvey_arm_1 | 1 | 143 | 2 | 1 | 11 | 6  |
| 2893 | presurvey_arm_1 | 1 | 143 | 2 | 1 | 12 | 6  |
| 2894 | presurvey_arm_1 | 1 | 143 | 2 | 1 | 11 | 6  |
| 2895 | presurvey_arm_1 | 1 | 143 | 2 | 1 | 11 | 6  |
| 2896 | presurvey_arm_1 | 1 | 143 | 1 | 1 | 12 | 6  |
| 2897 | presurvey_arm_1 | 1 | 143 | 2 | 1 | 11 | 6  |



|      |                 |   |     |   |   |    |   |
|------|-----------------|---|-----|---|---|----|---|
| 2898 | presurvey_arm_1 | 1 | 143 | 2 | 1 | 11 | 6 |
| 2899 | presurvey_arm_1 | 1 | 143 | 2 | 1 | 12 | 6 |
| 2900 | presurvey_arm_1 | 1 | 143 | 2 | 1 | 12 | 6 |
| 2901 | presurvey_arm_1 | 1 | 143 | 2 | 1 | 99 | 6 |
| 2902 | presurvey_arm_1 | 1 | 143 | 2 | 1 | 11 | 6 |
| 2903 | presurvey_arm_1 | 1 | 143 | 2 | 1 | 11 | 6 |
| 2904 | presurvey_arm_1 | 2 | 144 | 2 | 1 | 13 | 7 |
| 2905 | presurvey_arm_1 | 2 | 144 | 2 | 1 | 13 | 7 |
| 2906 | presurvey_arm_1 | 2 | 144 | 2 | 1 | 14 | 7 |
| 2907 | presurvey_arm_1 | 2 | 144 | 2 | 1 | 12 | 7 |
| 2908 | presurvey_arm_1 | 2 | 144 | 2 | 1 | 12 | 7 |
| 2909 | presurvey_arm_1 | 2 | 144 | 2 | 1 | 12 | 7 |
| 2910 | presurvey_arm_1 | 2 | 144 | 2 | 1 | 12 | 7 |
| 2911 | presurvey_arm_1 | 2 | 144 | 2 | 1 | 12 | 7 |
| 2912 | presurvey_arm_1 | 2 | 144 | 2 | 1 | 14 | 7 |
| 2913 | presurvey_arm_1 | 2 | 144 | 2 | 1 | 12 | 7 |
| 2914 | presurvey_arm_1 | 2 | 144 | 2 | 1 | 12 | 7 |
| 2915 | presurvey_arm_1 | 2 | 144 | 2 | 1 | 13 | 7 |
| 2916 | presurvey_arm_1 | 2 | 144 | 2 | 1 | 13 | 7 |
| 2917 | presurvey_arm_1 | 2 | 144 | 2 | 1 | 13 | 7 |
| 2918 | presurvey_arm_1 | 2 | 145 | 2 | 1 | 12 | 7 |
| 2919 | presurvey_arm_1 | 2 | 145 | 2 | 1 | 12 | 7 |
| 2920 | presurvey_arm_1 | 2 | 145 | 2 | 1 | 13 | 7 |
| 2921 | presurvey_arm_1 | 2 | 145 | 2 | 1 | 12 | 7 |
| 2922 | presurvey_arm_1 | 2 | 145 | 2 | 1 | 14 | 7 |
| 2923 | presurvey_arm_1 | 2 | 145 | 2 | 1 | 13 | 7 |
| 2924 | presurvey_arm_1 | 2 | 145 | 2 | 1 | 12 | 7 |
| 2925 | presurvey_arm_1 | 2 | 145 | 2 | 1 | 13 | 7 |
| 2926 | presurvey_arm_1 | 2 | 145 | 2 | 1 | 13 | 7 |
| 2927 | presurvey_arm_1 | 2 | 145 | 2 | 1 | 13 | 7 |
| 2928 | presurvey_arm_1 | 2 | 145 | 2 | 1 | 13 | 7 |
| 2929 | presurvey_arm_1 | 2 | 145 | 2 | 1 | 12 | 7 |
| 2930 | presurvey_arm_1 | 2 | 145 | 2 | 1 | 12 | 7 |
| 2931 | presurvey_arm_1 | 2 | 145 | 2 | 1 | 12 | 7 |
| 2932 | presurvey_arm_1 | 2 | 145 | 2 | 1 | 99 | 7 |
| 2933 | presurvey_arm_1 | 2 | 145 | 2 | 1 | 12 | 7 |
| 2934 | presurvey_arm_1 | 2 | 145 | 2 | 1 | 12 | 7 |
| 2935 | presurvey_arm_1 | 2 | 145 | 2 | 1 | 12 | 7 |
| 2936 | presurvey_arm_1 | 2 | 145 | 2 | 1 | 12 | 7 |
| 2937 | presurvey_arm_1 | 2 | 145 | 2 | 1 | 13 | 7 |
| 2938 | presurvey_arm_1 | 2 | 145 | 2 | 1 | 13 | 7 |
| 2939 | presurvey_arm_1 | 2 | 145 | 1 | 1 | 13 | 7 |
| 2940 | presurvey_arm_1 | 2 | 145 | 2 | 1 | 12 | 7 |
| 2941 | presurvey_arm_1 | 2 | 145 | 2 | 1 | 12 | 7 |
| 2942 | presurvey_arm_1 | 3 | 147 | 2 | 1 | 13 | 8 |
| 2943 | presurvey_arm_1 | 3 | 147 | 2 | 1 | 14 | 8 |
| 2944 | presurvey_arm_1 | 3 | 147 | 2 | 1 | 14 | 8 |
| 2945 | presurvey_arm_1 | 3 | 147 | 2 | 1 | 13 | 8 |

|      |                 |   |     |   |   |    |   |
|------|-----------------|---|-----|---|---|----|---|
| 2946 | presurvey_arm_1 | 3 | 147 | 2 | 1 | 14 | 8 |
| 2947 | presurvey_arm_1 | 3 | 147 | 2 | 1 | 14 | 8 |
| 2948 | presurvey_arm_1 | 3 | 147 | 2 | 1 | 13 | 8 |
| 2949 | presurvey_arm_1 | 3 | 147 | 2 | 1 | 13 | 8 |
| 2950 | presurvey_arm_1 | 3 | 147 | 2 | 1 | 13 | 8 |
| 2951 | presurvey_arm_1 | 3 | 147 | 2 | 1 | 11 | 6 |
| 2952 | presurvey_arm_1 | 3 | 147 | 2 | 1 | 13 | 8 |
| 2953 | presurvey_arm_1 | 3 | 147 | 2 | 1 | 13 | 8 |
| 2954 | presurvey_arm_1 | 3 | 147 | 2 | 1 | 13 | 8 |
| 2955 | presurvey_arm_1 | 3 | 147 | 2 | 1 | 13 | 8 |
| 2956 | presurvey_arm_1 | 3 | 147 | 2 | 1 | 14 | 8 |
| 2957 | presurvey_arm_1 | 3 | 147 | 2 | 1 | 13 | 8 |
| 2958 | presurvey_arm_1 | 3 | 147 | 2 | 1 | 13 | 8 |
| 2959 | presurvey_arm_1 | 3 | 147 | 1 | 1 | 14 | 8 |
| 2960 | presurvey_arm_1 | 3 | 147 | 2 | 1 | 12 | 8 |
| 2961 | presurvey_arm_1 | 3 | 147 | 2 | 1 | 14 | 8 |
| 2962 | presurvey_arm_1 | 3 | 147 | 2 | 1 | 13 | 8 |
| 2963 | presurvey_arm_1 | 3 | 147 | 2 | 1 | 14 | 8 |
| 2964 | presurvey_arm_1 | 3 | 148 | 2 | 1 | 14 | 8 |
| 2965 | presurvey_arm_1 | 3 | 148 | 2 | 1 | 13 | 8 |
| 2966 | presurvey_arm_1 | 3 | 148 | 2 | 1 | 14 | 8 |
| 2967 | presurvey_arm_1 | 3 | 148 | 2 | 1 | 14 | 8 |
| 2968 | presurvey_arm_1 | 3 | 148 | 2 | 1 | 13 | 8 |
| 2969 | presurvey_arm_1 | 3 | 148 | 2 | 1 | 13 | 8 |
| 2970 | presurvey_arm_1 | 3 | 148 | 2 | 1 | 14 | 8 |
| 2971 | presurvey_arm_1 | 3 | 148 | 2 | 1 | 14 | 8 |
| 2972 | presurvey_arm_1 | 3 | 148 | 2 | 1 | 14 | 8 |
| 2973 | presurvey_arm_1 | 3 | 148 | 2 | 1 | 13 | 8 |
| 2974 | presurvey_arm_1 | 3 | 148 | 2 | 1 | 13 | 8 |
| 2975 | presurvey_arm_1 | 3 | 148 | 2 | 1 | 13 | 8 |
| 2976 | presurvey_arm_1 | 3 | 148 | 2 | 1 | 14 | 8 |
| 3076 | presurvey_arm_1 | 1 | 154 | 2 | 1 | 11 | 6 |
| 3077 | presurvey_arm_1 | 1 | 154 | 2 | 1 | 11 | 6 |
| 3078 | presurvey_arm_1 | 1 | 154 | 2 | 1 | 11 | 6 |
| 3079 | presurvey_arm_1 | 1 | 154 | 2 | 1 | 12 | 6 |
| 3080 | presurvey_arm_1 | 1 | 154 | 2 | 1 | 12 | 6 |
| 3081 | presurvey_arm_1 | 1 | 154 | 2 | 1 | 12 | 6 |
| 3082 | presurvey_arm_1 | 1 | 154 | 2 | 1 | 12 | 6 |
| 3083 | presurvey_arm_1 | 1 | 154 | 2 | 1 | 11 | 6 |
| 3084 | presurvey_arm_1 | 1 | 154 | 2 | 1 | 12 | 6 |
| 3085 | presurvey_arm_1 | 1 | 154 | 2 | 1 | 12 | 6 |
| 3086 | presurvey_arm_1 | 1 | 154 | 2 | 1 | 12 | 6 |
| 3087 | presurvey_arm_1 | 1 | 154 | 2 | 1 | 11 | 6 |
| 3088 | presurvey_arm_1 | 1 | 154 | 2 | 1 | 11 | 6 |
| 3089 | presurvey_arm_1 | 1 | 154 | 2 | 1 | 11 | 6 |
| 3090 | presurvey_arm_1 | 1 | 154 | 2 | 1 | 12 | 6 |
| 3091 | presurvey_arm_1 | 1 | 154 | 2 | 1 | 11 | 6 |
| 3092 | presurvey_arm_1 | 1 | 155 | 2 | 1 | 11 | 6 |

|      |                 |   |     |   |   |    |    |
|------|-----------------|---|-----|---|---|----|----|
| 3093 | presurvey_arm_1 | 1 | 155 | 2 | 1 | 12 | 6  |
| 3094 | presurvey_arm_1 | 1 | 155 | 2 | 1 | 12 | 6  |
| 3095 | presurvey_arm_1 | 1 | 155 | 2 | 1 | 12 | 6  |
| 3096 | presurvey_arm_1 | 1 | 155 | 2 | 1 | 12 | 6  |
| 3097 | presurvey_arm_1 | 1 | 155 | 2 | 1 | 12 | 6  |
| 3098 | presurvey_arm_1 | 1 | 155 | 2 | 1 | 11 | 6  |
| 3099 | presurvey_arm_1 | 1 | 155 | 2 | 1 | 13 | 6  |
| 3100 | presurvey_arm_1 | 1 | 155 | 2 | 1 | 11 | 6  |
| 3101 | presurvey_arm_1 | 1 | 155 | 2 | 1 | 11 | 6  |
| 3102 | presurvey_arm_1 | 1 | 155 | 2 | 1 | 11 | 6  |
| 3103 | presurvey_arm_1 | 1 | 155 | 2 | 1 | 12 | 6  |
| 3104 | presurvey_arm_1 | 1 | 155 | 2 | 1 | 99 | 99 |
| 3105 | presurvey_arm_1 | 1 | 155 | 2 | 1 | 11 | 6  |
| 3106 | presurvey_arm_1 | 1 | 155 | 2 | 1 | 12 | 6  |
| 3107 | presurvey_arm_1 | 1 | 155 | 2 | 1 | 12 | 6  |
| 3108 | presurvey_arm_1 | 1 | 155 | 2 | 1 | 12 | 6  |
| 3109 | presurvey_arm_1 | 1 | 155 | 2 | 1 | 12 | 6  |
| 3110 | presurvey_arm_1 | 1 | 155 | 2 | 1 | 12 | 6  |
| 3111 | presurvey_arm_1 | 1 | 155 | 2 | 1 | 11 | 6  |
| 3112 | presurvey_arm_1 | 1 | 155 | 2 | 1 | 12 | 6  |
| 3113 | presurvey_arm_1 | 1 | 155 | 2 | 1 | 11 | 6  |
| 3114 | presurvey_arm_1 | 1 | 155 | 2 | 1 | 11 | 6  |
| 3115 | presurvey_arm_1 | 2 | 156 | 2 | 1 | 12 | 7  |
| 3116 | presurvey_arm_1 | 2 | 156 | 2 | 1 | 14 | 7  |
| 3117 | presurvey_arm_1 | 2 | 156 | 2 | 1 | 13 | 7  |
| 3118 | presurvey_arm_1 | 2 | 156 | 2 | 1 | 13 | 7  |
| 3119 | presurvey_arm_1 | 2 | 156 | 2 | 1 | 12 | 7  |
| 3120 | presurvey_arm_1 | 2 | 156 | 2 | 1 | 13 | 7  |
| 3121 | presurvey_arm_1 | 2 | 156 | 2 | 1 | 12 | 7  |
| 3122 | presurvey_arm_1 | 2 | 156 | 2 | 1 | 12 | 7  |
| 3123 | presurvey_arm_1 | 2 | 156 | 2 | 1 | 13 | 7  |
| 3124 | presurvey_arm_1 | 2 | 156 | 2 | 1 | 14 | 7  |
| 3125 | presurvey_arm_1 | 2 | 156 | 2 | 1 | 12 | 7  |
| 3126 | presurvey_arm_1 | 2 | 156 | 2 | 1 | 13 | 7  |
| 3127 | presurvey_arm_1 | 2 | 156 | 2 | 1 | 12 | 7  |
| 3128 | presurvey_arm_1 | 2 | 156 | 2 | 1 | 13 | 7  |
| 3129 | presurvey_arm_1 | 2 | 156 | 2 | 1 | 12 | 7  |
| 3130 | presurvey_arm_1 | 2 | 156 | 2 | 1 | 12 | 7  |
| 3131 | presurvey_arm_1 | 2 | 157 | 2 | 1 | 13 | 7  |
| 3132 | presurvey_arm_1 | 2 | 157 | 2 | 1 | 13 | 7  |
| 3133 | presurvey_arm_1 | 2 | 157 | 2 | 1 | 12 | 7  |
| 3134 | presurvey_arm_1 | 2 | 157 | 2 | 1 | 13 | 7  |
| 3135 | presurvey_arm_1 | 2 | 157 | 2 | 1 | 14 | 7  |
| 3136 | presurvey_arm_1 | 2 | 157 | 2 | 1 | 13 | 7  |
| 3137 | presurvey_arm_1 | 2 | 157 | 2 | 1 | 11 | 7  |
| 3138 | presurvey_arm_1 | 2 | 157 | 2 | 1 | 12 | 7  |
| 3139 | presurvey_arm_1 | 2 | 157 | 2 | 1 | 12 | 7  |
| 3140 | presurvey_arm_1 | 2 | 157 | 2 | 1 | 13 | 7  |

|      |                 |   |     |   |   |    |   |
|------|-----------------|---|-----|---|---|----|---|
| 3141 | presurvey_arm_1 | 2 | 157 | 2 | 1 | 13 | 7 |
| 3142 | presurvey_arm_1 | 2 | 157 | 2 | 1 | 13 | 7 |
| 3143 | presurvey_arm_1 | 2 | 157 | 2 | 1 | 12 | 7 |
| 3144 | presurvey_arm_1 | 2 | 157 | 2 | 1 | 12 | 7 |
| 3145 | presurvey_arm_1 | 2 | 157 | 2 | 1 | 12 | 7 |
| 3146 | presurvey_arm_1 | 2 | 157 | 2 | 1 | 13 | 6 |
| 3147 | presurvey_arm_1 | 2 | 157 | 2 | 1 | 13 | 7 |
| 3148 | presurvey_arm_1 | 2 | 157 | 2 | 1 | 13 | 7 |
| 3149 | presurvey_arm_1 | 2 | 157 | 2 | 1 | 13 | 7 |
| 3150 | presurvey_arm_1 | 2 | 157 | 2 | 1 | 13 | 7 |
| 3151 | presurvey_arm_1 | 2 | 157 | 2 | 1 | 14 | 7 |
| 3152 | presurvey_arm_1 | 3 | 158 | 2 | 1 | 14 | 8 |
| 3153 | presurvey_arm_1 | 3 | 158 | 2 | 1 | 13 | 8 |
| 3154 | presurvey_arm_1 | 3 | 158 | 2 | 1 | 14 | 8 |
| 3155 | presurvey_arm_1 | 3 | 158 | 2 | 1 | 13 | 8 |
| 3156 | presurvey_arm_1 | 3 | 158 | 2 | 1 | 13 | 8 |
| 3157 | presurvey_arm_1 | 3 | 158 | 2 | 1 | 14 | 8 |
| 3158 | presurvey_arm_1 | 3 | 158 | 2 | 1 | 14 | 8 |
| 3159 | presurvey_arm_1 | 3 | 158 | 2 | 1 | 13 | 8 |
| 3160 | presurvey_arm_1 | 3 | 158 | 2 | 1 | 14 | 8 |
| 3161 | presurvey_arm_1 | 3 | 158 | 2 | 1 | 13 | 8 |
| 3162 | presurvey_arm_1 | 3 | 158 | 2 | 1 | 13 | 8 |
| 3163 | presurvey_arm_1 | 3 | 158 | 2 | 1 | 14 | 8 |
| 3164 | presurvey_arm_1 | 3 | 158 | 2 | 1 | 14 | 8 |
| 3165 | presurvey_arm_1 | 3 | 158 | 2 | 1 | 13 | 8 |
| 3166 | presurvey_arm_1 | 3 | 158 | 2 | 1 | 14 | 8 |
| 3167 | presurvey_arm_1 | 3 | 158 | 2 | 1 | 13 | 8 |
| 3168 | presurvey_arm_1 | 3 | 158 | 2 | 1 | 13 | 8 |
| 3169 | presurvey_arm_1 | 3 | 158 | 2 | 1 | 13 | 8 |
| 3170 | presurvey_arm_1 | 3 | 159 | 2 | 1 | 14 | 8 |
| 3171 | presurvey_arm_1 | 3 | 159 | 2 | 1 | 14 | 8 |
| 3172 | presurvey_arm_1 | 3 | 159 | 2 | 1 | 13 | 8 |
| 3173 | presurvey_arm_1 | 3 | 159 | 2 | 1 | 14 | 8 |
| 3174 | presurvey_arm_1 | 3 | 159 | 2 | 1 | 13 | 8 |
| 3175 | presurvey_arm_1 | 3 | 159 | 2 | 1 | 14 | 8 |
| 3176 | presurvey_arm_1 | 3 | 159 | 2 | 1 | 13 | 8 |
| 3177 | presurvey_arm_1 | 3 | 159 | 2 | 1 | 14 | 8 |
| 3178 | presurvey_arm_1 | 3 | 159 | 2 | 1 | 13 | 8 |
| 3179 | presurvey_arm_1 | 3 | 159 | 2 | 1 | 13 | 8 |
| 3180 | presurvey_arm_1 | 3 | 159 | 2 | 1 | 13 | 8 |
| 3181 | presurvey_arm_1 | 3 | 159 | 2 | 1 | 14 | 8 |
| 3182 | presurvey_arm_1 | 3 | 159 | 2 | 1 | 13 | 8 |
| 3183 | presurvey_arm_1 | 3 | 159 | 2 | 1 | 14 | 8 |
| 3184 | presurvey_arm_1 | 3 | 159 | 2 | 1 | 13 | 8 |
| 3185 | presurvey_arm_1 | 3 | 159 | 2 | 1 | 15 | 8 |
| 3186 | presurvey_arm_1 | 1 | 160 | 2 | 1 | 13 | 6 |
| 3187 | presurvey_arm_1 | 1 | 160 | 2 | 1 | 11 | 6 |
| 3188 | presurvey_arm_1 | 1 | 160 | 2 | 1 | 12 | 6 |

|      |                 |   |     |   |   |    |   |
|------|-----------------|---|-----|---|---|----|---|
| 3189 | presurvey_arm_1 | 1 | 160 | 2 | 1 | 11 | 6 |
| 3190 | presurvey_arm_1 | 1 | 160 | 3 | 1 | 11 | 6 |
| 3191 | presurvey_arm_1 | 1 | 160 | 2 | 1 | 12 | 6 |
| 3192 | presurvey_arm_1 | 1 | 160 | 2 | 1 | 11 | 6 |
| 3193 | presurvey_arm_1 | 1 | 160 | 2 | 1 | 11 | 6 |
| 3194 | presurvey_arm_1 | 1 | 160 | 2 | 1 | 11 | 6 |
| 3195 | presurvey_arm_1 | 1 | 160 | 2 | 1 | 12 | 6 |
| 3196 | presurvey_arm_1 | 1 | 160 | 2 | 1 | 11 | 6 |
| 3197 | presurvey_arm_1 | 1 | 160 | 2 | 1 | 11 | 6 |
| 3198 | presurvey_arm_1 | 1 | 161 | 2 | 1 | 11 | 6 |
| 3199 | presurvey_arm_1 | 1 | 161 | 2 | 1 | 12 | 6 |
| 3200 | presurvey_arm_1 | 1 | 161 | 2 | 1 | 11 | 6 |
| 3201 | presurvey_arm_1 | 1 | 161 | 2 | 1 | 11 | 6 |
| 3202 | presurvey_arm_1 | 1 | 161 | 2 | 1 | 11 | 6 |
| 3203 | presurvey_arm_1 | 1 | 161 | 2 | 1 | 12 | 6 |
| 3204 | presurvey_arm_1 | 1 | 161 | 2 | 1 | 11 | 6 |
| 3205 | presurvey_arm_1 | 1 | 161 | 2 | 1 | 12 | 6 |
| 3206 | presurvey_arm_1 | 1 | 161 | 2 | 1 | 12 | 6 |
| 3207 | presurvey_arm_1 | 1 | 161 | 3 | 1 | 11 | 6 |
| 3208 | presurvey_arm_1 | 1 | 161 | 2 | 1 | 13 | 6 |
| 3209 | presurvey_arm_1 | 1 | 161 | 2 | 1 | 12 | 6 |
| 3210 | presurvey_arm_1 | 1 | 161 | 2 | 1 | 12 | 6 |
| 3211 | presurvey_arm_1 | 1 | 161 | 2 | 1 | 12 | 6 |
| 3212 | presurvey_arm_1 | 2 | 162 | 2 | 1 | 12 | 7 |
| 3213 | presurvey_arm_1 | 2 | 162 | 2 | 1 | 13 | 8 |
| 3214 | presurvey_arm_1 | 2 | 162 | 2 | 1 | 13 | 7 |
| 3215 | presurvey_arm_1 | 2 | 162 | 2 | 1 | 13 | 7 |
| 3216 | presurvey_arm_1 | 2 | 162 | 3 | 1 | 13 | 7 |
| 3217 | presurvey_arm_1 | 2 | 162 | 2 | 1 | 12 | 7 |
| 3218 | presurvey_arm_1 | 2 | 162 | 2 | 1 | 12 | 7 |
| 3219 | presurvey_arm_1 | 2 | 162 | 3 | 1 | 14 | 7 |
| 3220 | presurvey_arm_1 | 2 | 162 | 2 | 1 | 12 | 7 |
| 3221 | presurvey_arm_1 | 2 | 162 | 2 | 1 | 13 | 7 |
| 3222 | presurvey_arm_1 | 2 | 162 | 2 | 1 | 13 | 7 |
| 3223 | presurvey_arm_1 | 2 | 162 | 2 | 1 | 13 | 7 |
| 3224 | presurvey_arm_1 | 2 | 162 | 2 | 1 | 12 | 7 |
| 3225 | presurvey_arm_1 | 2 | 162 | 2 | 1 | 12 | 7 |
| 3226 | presurvey_arm_1 | 2 | 162 | 2 | 1 | 12 | 7 |
| 3227 | presurvey_arm_1 | 2 | 162 | 2 | 1 | 12 | 7 |
| 3228 | presurvey_arm_1 | 2 | 162 | 2 | 1 | 13 | 7 |
| 3229 | presurvey_arm_1 | 1 | 161 | 3 | 1 | 13 | 6 |
| 3230 | presurvey_arm_1 | 1 | 161 | 2 | 1 | 11 | 6 |
| 3231 | presurvey_arm_1 | 1 | 161 | 2 | 1 | 12 | 6 |
| 3232 | presurvey_arm_1 | 1 | 161 | 2 | 1 | 12 | 6 |
| 3233 | presurvey_arm_1 | 1 | 161 | 2 | 1 | 12 | 6 |
| 3234 | presurvey_arm_1 | 1 | 161 | 2 | 1 | 12 | 6 |
| 3235 | presurvey_arm_1 | 1 | 161 | 2 | 1 | 11 | 6 |
| 3236 | presurvey_arm_1 | 1 | 161 | 2 | 1 | 12 | 6 |

|      |                 |   |     |   |   |    |   |
|------|-----------------|---|-----|---|---|----|---|
| 3237 | presurvey_arm_1 | 1 | 161 | 2 | 1 | 12 | 6 |
| 3238 | presurvey_arm_1 | 1 | 161 | 2 | 1 | 12 | 6 |
| 3239 | presurvey_arm_1 | 2 | 163 | 2 | 1 | 13 | 7 |
| 3240 | presurvey_arm_1 | 2 | 163 | 2 | 1 | 13 | 7 |
| 3241 | presurvey_arm_1 | 2 | 163 | 2 | 1 | 13 | 7 |
| 3242 | presurvey_arm_1 | 2 | 163 | 2 | 1 | 13 | 7 |
| 3243 | presurvey_arm_1 | 2 | 163 | 2 | 1 | 13 | 7 |
| 3244 | presurvey_arm_1 | 2 | 163 | 2 | 1 | 13 | 7 |
| 3245 | presurvey_arm_1 | 2 | 163 | 2 | 1 | 13 | 7 |
| 3246 | presurvey_arm_1 | 2 | 163 | 2 | 1 | 12 | 7 |
| 3247 | presurvey_arm_1 | 2 | 163 | 2 | 1 | 13 | 7 |
| 3248 | presurvey_arm_1 | 2 | 163 | 2 | 1 | 12 | 7 |
| 3249 | presurvey_arm_1 | 2 | 163 | 2 | 1 | 13 | 7 |
| 3250 | presurvey_arm_1 | 2 | 163 | 2 | 1 | 13 | 7 |
| 3251 | presurvey_arm_1 | 2 | 163 | 2 | 1 | 13 | 7 |
| 3252 | presurvey_arm_1 | 2 | 163 | 2 | 1 | 12 | 7 |
| 3253 | presurvey_arm_1 | 2 | 163 | 2 | 1 | 13 | 7 |
| 3254 | presurvey_arm_1 | 2 | 163 | 2 | 1 | 13 | 7 |
| 3255 | presurvey_arm_1 | 2 | 163 | 2 | 1 | 13 | 7 |
| 3256 | presurvey_arm_1 | 2 | 163 | 2 | 1 | 13 | 7 |
| 3257 | presurvey_arm_1 | 2 | 163 | 2 | 1 | 12 | 7 |
| 3258 | presurvey_arm_1 | 2 | 163 | 2 | 1 | 13 | 7 |
| 3259 | presurvey_arm_1 | 2 | 163 | 2 | 1 | 13 | 7 |
| 3260 | presurvey_arm_1 | 2 | 163 | 2 | 1 | 13 | 7 |
| 3261 | presurvey_arm_1 | 2 | 163 | 2 | 1 | 13 | 7 |
| 3262 | presurvey_arm_1 | 3 | 164 | 2 | 1 | 13 | 8 |
| 3263 | presurvey_arm_1 | 3 | 164 | 2 | 1 | 14 | 8 |
| 3264 | presurvey_arm_1 | 3 | 164 | 2 | 1 | 13 | 8 |
| 3265 | presurvey_arm_1 | 3 | 164 | 2 | 1 | 13 | 8 |
| 3266 | presurvey_arm_1 | 3 | 164 | 2 | 1 | 14 | 8 |
| 3267 | presurvey_arm_1 | 3 | 164 | 2 | 1 | 13 | 8 |
| 3268 | presurvey_arm_1 | 3 | 164 | 2 | 1 | 14 | 8 |
| 3269 | presurvey_arm_1 | 3 | 164 | 2 | 1 | 14 | 8 |
| 3270 | presurvey_arm_1 | 3 | 164 | 2 | 1 | 14 | 8 |
| 3271 | presurvey_arm_1 | 3 | 164 | 2 | 1 | 14 | 8 |
| 3272 | presurvey_arm_1 | 3 | 164 | 2 | 1 | 14 | 8 |
| 3273 | presurvey_arm_1 | 3 | 165 | 2 | 1 | 13 | 8 |
| 3274 | presurvey_arm_1 | 3 | 165 | 3 | 1 | 13 | 8 |
| 3275 | presurvey_arm_1 | 3 | 165 | 2 | 1 | 14 | 8 |
| 3276 | presurvey_arm_1 | 3 | 165 | 2 | 1 | 14 | 8 |
| 3277 | presurvey_arm_1 | 3 | 165 | 2 | 1 | 14 | 8 |
| 3278 | presurvey_arm_1 | 3 | 165 | 2 | 1 | 14 | 8 |
| 3279 | presurvey_arm_1 | 3 | 165 | 3 | 1 | 13 | 8 |
| 3280 | presurvey_arm_1 | 3 | 165 | 2 | 1 | 14 | 8 |
| 3281 | presurvey_arm_1 | 3 | 165 | 2 | 1 | 14 | 8 |
| 3282 | presurvey_arm_1 | 3 | 165 | 2 | 1 | 13 | 8 |
| 3283 | presurvey_arm_1 | 3 | 165 | 3 | 1 | 14 | 8 |
| 3284 | presurvey_arm_1 | 3 | 165 | 2 | 1 | 13 | 8 |

|      |                 |   |     |   |   |    |   |
|------|-----------------|---|-----|---|---|----|---|
| 3285 | presurvey_arm_1 | 3 | 165 | 2 | 1 | 14 | 8 |
| 3286 | presurvey_arm_1 | 3 | 165 | 2 | 1 | 14 | 8 |
| 3287 | presurvey_arm_1 | 3 | 165 | 2 | 1 | 13 | 8 |
| 3288 | presurvey_arm_1 | 3 | 165 | 2 | 1 | 15 | 8 |
| 3289 | presurvey_arm_1 | 3 | 165 | 3 | 1 | 14 | 8 |
| 3290 | presurvey_arm_1 | 3 | 165 | 2 | 1 | 14 | 8 |
| 3291 | presurvey_arm_1 | 1 | 174 | 3 | 1 | 12 | 6 |
| 3292 | presurvey_arm_1 | 1 | 174 | 2 | 1 | 12 | 6 |
| 3293 | presurvey_arm_1 | 1 | 174 | 3 | 1 | 12 | 6 |
| 3294 | presurvey_arm_1 | 1 | 174 | 2 | 1 | 11 | 6 |
| 3295 | presurvey_arm_1 | 1 | 174 | 2 | 1 | 12 | 6 |
| 3296 | presurvey_arm_1 | 1 | 174 | 2 | 1 | 12 | 6 |
| 3297 | presurvey_arm_1 | 1 | 174 | 2 | 1 | 12 | 6 |
| 3298 | presurvey_arm_1 | 1 | 174 | 2 | 1 | 12 | 6 |
| 3299 | presurvey_arm_1 | 1 | 174 | 2 | 1 | 12 | 6 |
| 3300 | presurvey_arm_1 | 1 | 174 | 3 | 1 | 11 | 6 |
| 3301 | presurvey_arm_1 | 1 | 174 | 3 | 1 | 11 | 6 |
| 3302 | presurvey_arm_1 | 1 | 174 | 2 | 1 | 12 | 6 |
| 3303 | presurvey_arm_1 | 1 | 174 | 3 | 1 | 12 | 6 |
| 3304 | presurvey_arm_1 | 1 | 175 | 3 | 1 | 12 | 6 |
| 3305 | presurvey_arm_1 | 1 | 175 | 2 | 1 | 12 | 6 |
| 3306 | presurvey_arm_1 | 1 | 175 | 3 | 1 | 12 | 6 |
| 3307 | presurvey_arm_1 | 1 | 174 | 3 | 1 | 12 | 6 |
| 3308 | presurvey_arm_1 | 1 | 175 | 3 | 1 | 12 | 6 |
| 3309 | presurvey_arm_1 | 1 | 175 | 2 | 1 | 12 | 6 |
| 3310 | presurvey_arm_1 | 1 | 175 | 2 | 1 | 12 | 6 |
| 3311 | presurvey_arm_1 | 1 | 175 | 3 | 1 | 12 | 6 |
| 3312 | presurvey_arm_1 | 1 | 175 | 3 | 1 | 11 | 6 |
| 3313 | presurvey_arm_1 | 1 | 175 | 3 | 1 | 12 | 6 |
| 3314 | presurvey_arm_1 | 1 | 175 | 2 | 1 | 12 | 6 |
| 3315 | presurvey_arm_1 | 1 | 175 | 2 | 1 | 11 | 6 |
| 3316 | presurvey_arm_1 | 1 | 175 | 2 | 1 | 12 | 6 |
| 3317 | presurvey_arm_1 | 1 | 175 | 3 | 1 | 12 | 6 |
| 3318 | presurvey_arm_1 | 1 | 175 | 3 | 1 | 12 | 6 |
| 3319 | presurvey_arm_1 | 1 | 175 | 3 | 1 | 12 | 6 |
| 3320 | presurvey_arm_1 | 1 | 175 | 2 | 1 | 12 | 6 |
| 3321 | presurvey_arm_1 | 1 | 175 | 3 | 1 | 11 | 6 |
| 3322 | presurvey_arm_1 | 1 | 175 | 2 | 1 | 12 | 6 |
| 3323 | presurvey_arm_1 | 1 | 175 | 3 | 1 | 12 | 6 |
| 3324 | presurvey_arm_1 | 1 | 175 | 2 | 1 | 11 | 6 |
| 3325 | presurvey_arm_1 | 1 | 175 | 3 | 1 | 12 | 6 |
| 3326 | presurvey_arm_1 | 2 | 176 | 3 | 1 | 13 | 7 |
| 3327 | presurvey_arm_1 | 2 | 176 | 2 | 1 | 13 | 7 |
| 3328 | presurvey_arm_1 | 2 | 176 | 2 | 1 | 12 | 7 |
| 3329 | presurvey_arm_1 | 2 | 176 | 3 | 1 | 14 | 7 |
| 3330 | presurvey_arm_1 | 2 | 176 | 3 | 1 | 13 | 7 |
| 3331 | presurvey_arm_1 | 2 | 176 | 3 | 1 | 13 | 7 |
| 3332 | presurvey_arm_1 | 2 | 176 | 3 | 1 | 13 | 7 |

|      |                 |   |     |   |   |    |   |
|------|-----------------|---|-----|---|---|----|---|
| 3333 | presurvey_arm_1 | 2 | 176 | 3 | 1 | 13 | 7 |
| 3334 | presurvey_arm_1 | 2 | 176 | 2 | 1 | 13 | 7 |
| 3335 | presurvey_arm_1 | 2 | 176 | 3 | 1 | 14 | 7 |
| 3336 | presurvey_arm_1 | 2 | 176 | 2 | 1 | 12 | 7 |
| 3337 | presurvey_arm_1 | 2 | 176 | 3 | 1 | 13 | 7 |
| 3338 | presurvey_arm_1 | 2 | 176 | 3 | 1 | 12 | 7 |
| 3339 | presurvey_arm_1 | 2 | 176 | 3 | 1 | 12 | 7 |
| 3340 | presurvey_arm_1 | 2 | 176 | 3 | 1 | 13 | 7 |
| 3341 | presurvey_arm_1 | 2 | 177 | 3 | 1 | 13 | 7 |
| 3342 | presurvey_arm_1 | 2 | 177 | 3 | 1 | 13 | 7 |
| 3343 | presurvey_arm_1 | 2 | 177 | 3 | 1 | 13 | 7 |
| 3344 | presurvey_arm_1 | 2 | 177 | 2 | 1 | 13 | 7 |
| 3345 | presurvey_arm_1 | 2 | 177 | 3 | 1 | 14 | 7 |
| 3346 | presurvey_arm_1 | 2 | 177 | 2 | 1 | 13 | 7 |
| 3347 | presurvey_arm_1 | 2 | 177 | 2 | 1 | 12 | 7 |
| 3348 | presurvey_arm_1 | 2 | 177 | 3 | 1 | 13 | 7 |
| 3349 | presurvey_arm_1 | 2 | 177 | 2 | 1 | 13 | 7 |
| 3350 | presurvey_arm_1 | 2 | 177 | 2 | 1 | 12 | 7 |
| 3351 | presurvey_arm_1 | 2 | 177 | 3 | 1 | 13 | 7 |
| 3352 | presurvey_arm_1 | 2 | 177 | 3 | 1 | 13 | 7 |
| 3353 | presurvey_arm_1 | 2 | 177 | 3 | 1 | 12 | 7 |
| 3354 | presurvey_arm_1 | 2 | 177 | 3 | 1 | 12 | 7 |
| 3355 | presurvey_arm_1 | 2 | 177 | 2 | 1 | 12 | 7 |
| 3356 | presurvey_arm_1 | 2 | 177 | 2 | 1 | 12 | 7 |
| 3357 | presurvey_arm_1 | 2 | 177 | 3 | 1 | 10 | 6 |
| 3358 | presurvey_arm_1 | 2 | 177 | 3 | 1 | 12 | 7 |
| 3359 | presurvey_arm_1 | 2 | 177 | 2 | 1 | 13 | 7 |
| 3360 | presurvey_arm_1 | 3 | 178 | 2 | 1 | 14 | 8 |
| 3361 | presurvey_arm_1 | 3 | 178 | 3 | 1 | 14 | 8 |
| 3362 | presurvey_arm_1 | 3 | 178 | 2 | 1 | 14 | 8 |
| 3363 | presurvey_arm_1 | 3 | 178 | 3 | 1 | 14 | 8 |
| 3364 | presurvey_arm_1 | 3 | 178 | 2 | 1 | 14 | 8 |
| 3365 | presurvey_arm_1 | 3 | 178 | 3 | 1 | 13 | 8 |
| 3366 | presurvey_arm_1 | 3 | 178 | 2 | 1 | 14 | 8 |
| 3367 | presurvey_arm_1 | 3 | 178 | 2 | 1 | 14 | 8 |
| 3368 | presurvey_arm_1 | 3 | 178 | 2 | 1 | 14 | 8 |
| 3369 | presurvey_arm_1 | 3 | 178 | 3 | 1 | 14 | 8 |
| 3370 | presurvey_arm_1 | 3 | 179 | 2 | 1 | 14 | 8 |
| 3371 | presurvey_arm_1 | 3 | 179 | 2 | 1 | 14 | 8 |
| 3372 | presurvey_arm_1 | 3 | 179 | 3 | 1 | 14 | 8 |
| 3373 | presurvey_arm_1 | 3 | 179 | 3 | 1 | 14 | 8 |
| 3374 | presurvey_arm_1 | 3 | 179 | 3 | 1 | 14 | 8 |
| 3375 | presurvey_arm_1 | 3 | 179 | 2 | 1 | 13 | 8 |
| 3376 | presurvey_arm_1 | 3 | 179 | 3 | 1 | 14 | 8 |
| 3377 | presurvey_arm_1 | 3 | 179 | 3 | 1 | 16 | 8 |
| 3378 | presurvey_arm_1 | 3 | 179 | 3 | 1 | 14 | 8 |
| 3379 | presurvey_arm_1 | 3 | 179 | 3 | 1 | 14 | 8 |
| 3380 | presurvey_arm_1 | 3 | 179 | 2 | 1 | 14 | 8 |



|      |                 |   |     |   |   |    |   |
|------|-----------------|---|-----|---|---|----|---|
| 3407 | presurvey_arm_1 | 1 | 155 | 2 | 1 | 13 | 6 |
| 3443 | presurvey_arm_1 | 2 | 157 | 2 | 1 | 13 | 7 |
| 3456 | presurvey_arm_1 | 3 | 158 | 2 | 1 | 14 | 8 |
| 3674 | presurvey_arm_1 | 1 | 20  | 1 | 1 | 11 | 6 |
| 3675 | presurvey_arm_1 | 1 | 20  | 1 | 1 | 11 | 6 |
| 3676 | presurvey_arm_1 | 1 | 20  | 1 | 1 | 12 | 6 |
| 3677 | presurvey_arm_1 | 1 | 20  | 1 | 1 | 12 | 6 |
| 3678 | presurvey_arm_1 | 1 | 20  | 1 | 1 | 12 | 6 |
| 3679 | presurvey_arm_1 | 1 | 20  | 1 | 1 | 11 | 6 |
| 3680 | presurvey_arm_1 | 1 | 20  | 1 | 1 | 11 | 6 |
| 3681 | presurvey_arm_1 | 1 | 20  | 1 | 1 | 11 | 6 |
| 3682 | presurvey_arm_1 | 1 | 20  | 1 | 1 | 11 | 6 |
| 3683 | presurvey_arm_1 | 1 | 20  | 1 | 1 | 12 | 6 |
| 3684 | presurvey_arm_1 | 1 | 20  | 1 | 1 | 11 | 6 |
| 3685 | presurvey_arm_1 | 1 | 20  | 1 | 1 | 11 | 6 |
| 3686 | presurvey_arm_1 | 1 | 20  | 1 | 1 | 12 | 6 |
| 3687 | presurvey_arm_1 | 1 | 20  | 1 | 1 | 11 | 6 |
| 3688 | presurvey_arm_1 | 1 | 20  | 1 | 1 | 11 | 6 |
| 3689 | presurvey_arm_1 | 1 | 21  | 1 | 1 | 11 | 6 |
| 3690 | presurvey_arm_1 | 1 | 21  | 1 | 1 | 12 | 6 |
| 3691 | presurvey_arm_1 | 1 | 21  | 1 | 1 | 10 | 6 |
| 3692 | presurvey_arm_1 | 1 | 21  | 1 | 1 | 11 | 6 |
| 3693 | presurvey_arm_1 | 1 | 21  | 1 | 1 | 13 | 6 |
| 3694 | presurvey_arm_1 | 1 | 21  | 1 | 1 | 12 | 6 |
| 3695 | presurvey_arm_1 | 1 | 21  | 1 | 1 | 12 | 6 |
| 3696 | presurvey_arm_1 | 1 | 21  | 1 | 1 | 99 | 6 |
| 3697 | presurvey_arm_1 | 1 | 21  | 1 | 1 | 11 | 6 |
| 3698 | presurvey_arm_1 | 1 | 21  | 1 | 1 | 11 | 6 |
| 3699 | presurvey_arm_1 | 1 | 21  | 1 | 1 | 12 | 6 |
| 3700 | presurvey_arm_1 | 1 | 21  | 1 | 1 | 11 | 6 |
| 3701 | presurvey_arm_1 | 1 | 21  | 1 | 1 | 11 | 6 |
| 3702 | presurvey_arm_1 | 2 | 22  | 1 | 1 | 13 | 7 |
| 3703 | presurvey_arm_1 | 2 | 22  | 1 | 1 | 13 | 7 |
| 3704 | presurvey_arm_1 | 2 | 22  | 1 | 1 | 12 | 7 |
| 3705 | presurvey_arm_1 | 2 | 22  | 1 | 1 | 12 | 7 |
| 3706 | presurvey_arm_1 | 2 | 22  | 1 | 1 | 12 | 7 |
| 3707 | presurvey_arm_1 | 2 | 22  | 1 | 1 | 12 | 7 |
| 3708 | presurvey_arm_1 | 2 | 22  | 1 | 1 | 12 | 7 |
| 3709 | presurvey_arm_1 | 2 | 22  | 1 | 1 | 12 | 7 |
| 3710 | presurvey_arm_1 | 2 | 22  | 1 | 1 | 12 | 7 |
| 3711 | presurvey_arm_1 | 2 | 22  | 1 | 1 | 13 | 7 |
| 3712 | presurvey_arm_1 | 2 | 22  | 1 | 1 | 12 | 7 |
| 3713 | presurvey_arm_1 | 2 | 22  | 1 | 1 | 12 | 7 |
| 3714 | presurvey_arm_1 | 2 | 22  | 1 | 1 | 12 | 7 |
| 3715 | presurvey_arm_1 | 2 | 23  | 1 | 1 | 12 | 7 |
| 3716 | presurvey_arm_1 | 2 | 23  | 1 | 1 | 12 | 7 |
| 3717 | presurvey_arm_1 | 2 | 23  | 1 | 1 | 12 | 7 |
| 3718 | presurvey_arm_1 | 2 | 23  | 1 | 1 | 12 | 7 |

|      |                 |   |    |   |   |    |    |
|------|-----------------|---|----|---|---|----|----|
| 3719 | presurvey_arm_1 | 2 | 23 | 1 | 1 | 12 | 7  |
| 3720 | presurvey_arm_1 | 2 | 23 | 1 | 1 | 12 | 7  |
| 3721 | presurvey_arm_1 | 2 | 23 | 1 | 1 | 12 | 7  |
| 3722 | presurvey_arm_1 | 2 | 23 | 1 | 1 | 12 | 7  |
| 3723 | presurvey_arm_1 | 2 | 23 | 1 | 1 | 12 | 7  |
| 3724 | presurvey_arm_1 | 2 | 23 | 1 | 1 | 12 | 7  |
| 3725 | presurvey_arm_1 | 2 | 23 | 1 | 1 | 12 | 7  |
| 3726 | presurvey_arm_1 | 2 | 23 | 1 | 1 | 12 | 7  |
| 3727 | presurvey_arm_1 | 2 | 23 | 1 | 1 | 12 | 7  |
| 3728 | presurvey_arm_1 | 2 | 23 | 1 | 1 | 12 | 7  |
| 3729 | presurvey_arm_1 | 2 | 23 | 1 | 1 | 12 | 7  |
| 3730 | presurvey_arm_1 | 2 | 23 | 1 | 1 | 12 | 7  |
| 3731 | presurvey_arm_1 | 2 | 23 | 1 | 1 | 12 | 7  |
| 3732 | presurvey_arm_1 | 3 | 24 | 1 | 1 | 14 | 8  |
| 3733 | presurvey_arm_1 | 3 | 24 | 1 | 1 | 13 | 8  |
| 3734 | presurvey_arm_1 | 3 | 24 | 1 | 1 | 13 | 8  |
| 3735 | presurvey_arm_1 | 3 | 24 | 1 | 1 | 13 | 8  |
| 3736 | presurvey_arm_1 | 3 | 24 | 1 | 1 | 13 | 8  |
| 3737 | presurvey_arm_1 | 3 | 24 | 1 | 1 | 13 | 8  |
| 3738 | presurvey_arm_1 | 3 | 24 | 1 | 1 | 13 | 8  |
| 3739 | presurvey_arm_1 | 3 | 24 | 1 | 1 | 14 | 8  |
| 3740 | presurvey_arm_1 | 3 | 24 | 1 | 1 | 13 | 8  |
| 3741 | presurvey_arm_1 | 3 | 24 | 1 | 1 | 13 | 8  |
| 3742 | presurvey_arm_1 | 3 | 24 | 1 | 1 | 14 | 8  |
| 3743 | presurvey_arm_1 | 3 | 24 | 1 | 1 | 13 | 8  |
| 3744 | presurvey_arm_1 | 3 | 24 | 1 | 1 | 13 | 8  |
| 3745 | presurvey_arm_1 | 3 | 24 | 1 | 1 | 13 | 8  |
| 3746 | presurvey_arm_1 | 3 | 24 | 1 | 1 | 13 | 8  |
| 3747 | presurvey_arm_1 | 3 | 25 | 1 | 1 | 13 | 8  |
| 3748 | presurvey_arm_1 | 3 | 25 | 1 | 1 | 13 | 8  |
| 3749 | presurvey_arm_1 | 3 | 25 | 1 | 1 | 13 | 8  |
| 3750 | presurvey_arm_1 | 3 | 25 | 1 | 1 | 13 | 8  |
| 3751 | presurvey_arm_1 | 3 | 25 | 1 | 1 | 13 | 8  |
| 3752 | presurvey_arm_1 | 3 | 25 | 1 | 1 | 13 | 8  |
| 3753 | presurvey_arm_1 | 3 | 25 | 1 | 1 | 13 | 8  |
| 3754 | presurvey_arm_1 | 3 | 25 | 1 | 1 | 13 | 8  |
| 3755 | presurvey_arm_1 | 3 | 25 | 1 | 1 | 13 | 8  |
| 3756 | presurvey_arm_1 | 3 | 25 | 1 | 1 | 13 | 8  |
| 3757 | presurvey_arm_1 | 3 | 25 | 1 | 1 | 13 | 8  |
| 3758 | presurvey_arm_1 | 3 | 25 | 1 | 1 | 13 | 8  |
| 3759 | presurvey_arm_1 | 3 | 25 | 1 | 1 | 15 | 8  |
| 3760 | presurvey_arm_1 | 3 | 25 | 1 | 1 | 14 | 8  |
| 3761 | presurvey_arm_1 | 3 | 25 | 1 | 1 | 13 | 99 |
| 3933 | presurvey_arm_1 | 1 | 30 | 1 | 1 | 12 | 6  |
| 3934 | presurvey_arm_1 | 1 | 30 | 1 | 1 | 11 | 6  |
| 3935 | presurvey_arm_1 | 1 | 30 | 1 | 1 | 12 | 6  |
| 3936 | presurvey_arm_1 | 1 | 30 | 1 | 1 | 11 | 6  |
| 3937 | presurvey_arm_1 | 1 | 30 | 1 | 1 | 12 | 6  |

|      |                 |   |    |   |   |    |   |
|------|-----------------|---|----|---|---|----|---|
| 3938 | presurvey_arm_1 | 1 | 30 | 1 | 1 | 11 | 6 |
| 3939 | presurvey_arm_1 | 1 | 30 | 1 | 1 | 11 | 6 |
| 3940 | presurvey_arm_1 | 1 | 30 | 1 | 1 | 11 | 6 |
| 3941 | presurvey_arm_1 | 1 | 30 | 1 | 1 | 12 | 6 |
| 3942 | presurvey_arm_1 | 1 | 30 | 1 | 1 | 13 | 6 |
| 3943 | presurvey_arm_1 | 1 | 30 | 1 | 1 | 12 | 6 |
| 3944 | presurvey_arm_1 | 1 | 30 | 1 | 1 | 12 | 6 |
| 3945 | presurvey_arm_1 | 1 | 30 | 1 | 1 | 11 | 6 |
| 3946 | presurvey_arm_1 | 1 | 30 | 1 | 1 | 11 | 6 |
| 3947 | presurvey_arm_1 | 1 | 30 | 1 | 1 | 11 | 6 |
| 3948 | presurvey_arm_1 | 1 | 30 | 1 | 1 | 11 | 6 |
| 3949 | presurvey_arm_1 | 1 | 30 | 1 | 1 | 12 | 6 |
| 3950 | presurvey_arm_1 | 1 | 31 | 1 | 1 | 11 | 6 |
| 3951 | presurvey_arm_1 | 1 | 31 | 1 | 1 | 11 | 6 |
| 3952 | presurvey_arm_1 | 1 | 31 | 1 | 1 | 11 | 6 |
| 3953 | presurvey_arm_1 | 1 | 31 | 1 | 1 | 12 | 6 |
| 3954 | presurvey_arm_1 | 1 | 31 | 1 | 1 | 11 | 6 |
| 3955 | presurvey_arm_1 | 1 | 31 | 1 | 1 | 11 | 6 |
| 3956 | presurvey_arm_1 | 1 | 31 | 1 | 1 | 12 | 6 |
| 3957 | presurvey_arm_1 | 1 | 31 | 1 | 1 | 11 | 6 |
| 3958 | presurvey_arm_1 | 1 | 31 | 1 | 1 | 11 | 6 |
| 3959 | presurvey_arm_1 | 1 | 31 | 1 | 1 | 11 | 6 |
| 3960 | presurvey_arm_1 | 1 | 31 | 1 | 1 | 13 | 6 |
| 3961 | presurvey_arm_1 | 1 | 31 | 1 | 1 | 12 | 6 |
| 3962 | presurvey_arm_1 | 2 | 32 | 1 | 1 | 12 | 7 |
| 3963 | presurvey_arm_1 | 2 | 32 | 1 | 1 | 13 | 7 |
| 3964 | presurvey_arm_1 | 2 | 32 | 1 | 1 | 12 | 7 |
| 3965 | presurvey_arm_1 | 2 | 32 | 1 | 1 | 12 | 7 |
| 3966 | presurvey_arm_1 | 2 | 32 | 1 | 1 | 12 | 7 |
| 3967 | presurvey_arm_1 | 2 | 32 | 1 | 1 | 13 | 7 |
| 3968 | presurvey_arm_1 | 2 | 32 | 1 | 1 | 12 | 7 |
| 3969 | presurvey_arm_1 | 2 | 32 | 1 | 1 | 13 | 7 |
| 3970 | presurvey_arm_1 | 2 | 32 | 1 | 1 | 13 | 7 |
| 3971 | presurvey_arm_1 | 2 | 32 | 1 | 1 | 12 | 7 |
| 3972 | presurvey_arm_1 | 2 | 32 | 1 | 1 | 12 | 7 |
| 3973 | presurvey_arm_1 | 2 | 33 | 1 | 1 | 12 | 7 |
| 3974 | presurvey_arm_1 | 2 | 33 | 1 | 1 | 12 | 7 |
| 3975 | presurvey_arm_1 | 2 | 33 | 1 | 1 | 13 | 7 |
| 3976 | presurvey_arm_1 | 2 | 33 | 1 | 1 | 12 | 7 |
| 3977 | presurvey_arm_1 | 2 | 33 | 1 | 1 | 12 | 7 |
| 3978 | presurvey_arm_1 | 2 | 33 | 1 | 1 | 12 | 7 |
| 3979 | presurvey_arm_1 | 2 | 33 | 1 | 1 | 13 | 7 |
| 3980 | presurvey_arm_1 | 2 | 33 | 1 | 1 | 12 | 7 |
| 3981 | presurvey_arm_1 | 2 | 33 | 1 | 1 | 13 | 7 |
| 3982 | presurvey_arm_1 | 2 | 33 | 1 | 1 | 13 | 7 |
| 3983 | presurvey_arm_1 | 2 | 33 | 1 | 1 | 12 | 7 |
| 3984 | presurvey_arm_1 | 2 | 33 | 1 | 1 | 13 | 7 |
| 3985 | presurvey_arm_1 | 2 | 33 | 1 | 1 | 12 | 7 |

|      |                 |   |    |   |   |    |   |
|------|-----------------|---|----|---|---|----|---|
| 3986 | presurvey_arm_1 | 2 | 33 | 1 | 1 | 12 | 7 |
| 3987 | presurvey_arm_1 | 2 | 33 | 1 | 1 | 14 | 7 |
| 3988 | presurvey_arm_1 | 2 | 33 | 1 | 1 | 13 | 7 |
| 3989 | presurvey_arm_1 | 3 | 34 | 1 | 1 | 13 | 8 |
| 3990 | presurvey_arm_1 | 3 | 34 | 1 | 1 | 13 | 8 |
| 3991 | presurvey_arm_1 | 3 | 34 | 1 | 1 | 13 | 8 |
| 3992 | presurvey_arm_1 | 3 | 34 | 1 | 1 | 13 | 8 |
| 3993 | presurvey_arm_1 | 3 | 34 | 1 | 1 | 14 | 8 |
| 3994 | presurvey_arm_1 | 3 | 34 | 1 | 1 | 12 | 8 |
| 3995 | presurvey_arm_1 | 3 | 34 | 1 | 1 | 14 | 8 |
| 3996 | presurvey_arm_1 | 3 | 34 | 1 | 1 | 13 | 8 |
| 3997 | presurvey_arm_1 | 3 | 34 | 1 | 1 | 13 | 8 |
| 3998 | presurvey_arm_1 | 3 | 34 | 1 | 1 | 12 | 8 |
| 3999 | presurvey_arm_1 | 3 | 34 | 1 | 1 | 13 | 8 |
| 4000 | presurvey_arm_1 | 3 | 34 | 1 | 1 | 13 | 8 |
| 4001 | presurvey_arm_1 | 3 | 34 | 1 | 1 | 13 | 8 |
| 4002 | presurvey_arm_1 | 3 | 34 | 1 | 1 | 13 | 8 |
| 4003 | presurvey_arm_1 | 3 | 34 | 1 | 1 | 13 | 8 |
| 4004 | presurvey_arm_1 | 3 | 34 | 1 | 1 | 14 | 8 |
| 4005 | presurvey_arm_1 | 3 | 35 | 1 | 1 | 14 | 8 |
| 4006 | presurvey_arm_1 | 3 | 35 | 1 | 1 | 13 | 8 |
| 4007 | presurvey_arm_1 | 3 | 35 | 1 | 1 | 14 | 8 |
| 4008 | presurvey_arm_1 | 3 | 35 | 1 | 1 | 14 | 8 |
| 4009 | presurvey_arm_1 | 3 | 35 | 1 | 1 | 13 | 8 |
| 4010 | presurvey_arm_1 | 3 | 35 | 1 | 1 | 13 | 8 |
| 4011 | presurvey_arm_1 | 3 | 35 | 1 | 1 | 14 | 8 |
| 4012 | presurvey_arm_1 | 3 | 35 | 1 | 1 | 13 | 8 |
| 4013 | presurvey_arm_1 | 3 | 35 | 1 | 1 | 14 | 8 |
| 4014 | presurvey_arm_1 | 3 | 35 | 1 | 1 | 13 | 8 |
| 4015 | presurvey_arm_1 | 3 | 35 | 1 | 1 | 13 | 8 |
| 4016 | presurvey_arm_1 | 3 | 35 | 1 | 1 | 14 | 8 |
| 4017 | presurvey_arm_1 | 3 | 35 | 1 | 1 | 13 | 8 |
| 4018 | presurvey_arm_1 | 3 | 35 | 1 | 1 | 14 | 8 |
| 4019 | presurvey_arm_1 | 3 | 35 | 1 | 1 | 13 | 8 |
| 4020 | presurvey_arm_1 | 1 | 36 | 1 | 1 | 12 | 6 |
| 4021 | presurvey_arm_1 | 1 | 36 | 1 | 1 | 11 | 6 |
| 4022 | presurvey_arm_1 | 1 | 36 | 1 | 1 | 11 | 6 |
| 4023 | presurvey_arm_1 | 1 | 36 | 1 | 1 | 11 | 6 |
| 4024 | presurvey_arm_1 | 1 | 36 | 1 | 1 | 11 | 6 |
| 4025 | presurvey_arm_1 | 1 | 36 | 1 | 1 | 11 | 6 |
| 4026 | presurvey_arm_1 | 1 | 36 | 1 | 1 | 11 | 6 |
| 4027 | presurvey_arm_1 | 1 | 36 | 1 | 1 | 12 | 6 |
| 4028 | presurvey_arm_1 | 1 | 36 | 1 | 1 | 11 | 6 |
| 4029 | presurvey_arm_1 | 1 | 36 | 1 | 1 | 11 | 6 |
| 4030 | presurvey_arm_1 | 1 | 36 | 1 | 1 | 11 | 6 |
| 4031 | presurvey_arm_1 | 1 | 36 | 1 | 1 | 12 | 6 |
| 4032 | presurvey_arm_1 | 1 | 36 | 1 | 1 | 11 | 6 |
| 4033 | presurvey_arm_1 | 1 | 36 | 1 | 1 | 12 | 6 |

|      |                 |   |    |   |   |    |   |
|------|-----------------|---|----|---|---|----|---|
| 4034 | presurvey_arm_1 | 1 | 37 | 1 | 1 | 11 | 6 |
| 4035 | presurvey_arm_1 | 1 | 37 | 1 | 1 | 11 | 6 |
| 4036 | presurvey_arm_1 | 1 | 37 | 1 | 1 | 11 | 6 |
| 4037 | presurvey_arm_1 | 1 | 37 | 1 | 1 | 12 | 6 |
| 4038 | presurvey_arm_1 | 1 | 37 | 1 | 1 | 12 | 6 |
| 4039 | presurvey_arm_1 | 1 | 37 | 1 | 1 | 11 | 6 |
| 4040 | presurvey_arm_1 | 1 | 37 | 1 | 1 | 11 | 6 |
| 4041 | presurvey_arm_1 | 1 | 37 | 1 | 1 | 11 | 7 |
| 4042 | presurvey_arm_1 | 1 | 37 | 1 | 1 | 11 | 6 |
| 4043 | presurvey_arm_1 | 1 | 37 | 1 | 1 | 11 | 6 |
| 4044 | presurvey_arm_1 | 1 | 37 | 1 | 1 | 11 | 6 |
| 4045 | presurvey_arm_1 | 1 | 37 | 1 | 1 | 11 | 6 |
| 4046 | presurvey_arm_1 | 1 | 37 | 1 | 1 | 11 | 6 |
| 4047 | presurvey_arm_1 | 1 | 37 | 1 | 1 | 13 | 6 |
| 4048 | presurvey_arm_1 | 2 | 38 | 1 | 1 | 13 | 7 |
| 4049 | presurvey_arm_1 | 2 | 38 | 1 | 1 | 13 | 7 |
| 4050 | presurvey_arm_1 | 2 | 38 | 1 | 1 | 12 | 7 |
| 4051 | presurvey_arm_1 | 2 | 38 | 1 | 1 | 12 | 7 |
| 4052 | presurvey_arm_1 | 2 | 38 | 1 | 1 | 12 | 7 |
| 4053 | presurvey_arm_1 | 2 | 38 | 1 | 1 | 12 | 7 |
| 4054 | presurvey_arm_1 | 2 | 38 | 1 | 1 | 12 | 7 |
| 4055 | presurvey_arm_1 | 2 | 38 | 1 | 1 | 12 | 7 |
| 4056 | presurvey_arm_1 | 2 | 38 | 1 | 1 | 12 | 7 |
| 4057 | presurvey_arm_1 | 2 | 38 | 1 | 1 | 13 | 7 |
| 4058 | presurvey_arm_1 | 2 | 38 | 1 | 1 | 13 | 7 |
| 4059 | presurvey_arm_1 | 2 | 38 | 1 | 1 | 12 | 7 |
| 4060 | presurvey_arm_1 | 2 | 38 | 1 | 1 | 12 | 7 |
| 4061 | presurvey_arm_1 | 2 | 38 | 1 | 1 | 12 | 7 |
| 4062 | presurvey_arm_1 | 2 | 38 | 1 | 1 | 13 | 7 |
| 4063 | presurvey_arm_1 | 2 | 38 | 1 | 1 | 12 | 7 |
| 4064 | presurvey_arm_1 | 2 | 38 | 1 | 1 | 12 | 7 |
| 4065 | presurvey_arm_1 | 2 | 39 | 1 | 1 | 13 | 7 |
| 4066 | presurvey_arm_1 | 2 | 39 | 1 | 1 | 12 | 7 |
| 4067 | presurvey_arm_1 | 2 | 39 | 1 | 1 | 12 | 7 |
| 4068 | presurvey_arm_1 | 2 | 39 | 1 | 1 | 12 | 7 |
| 4069 | presurvey_arm_1 | 2 | 39 | 1 | 1 | 12 | 8 |
| 4070 | presurvey_arm_1 | 2 | 39 | 1 | 1 | 13 | 7 |
| 4071 | presurvey_arm_1 | 2 | 39 | 1 | 1 | 12 | 7 |
| 4072 | presurvey_arm_1 | 2 | 39 | 1 | 1 | 12 | 7 |
| 4073 | presurvey_arm_1 | 2 | 39 | 1 | 1 | 12 | 7 |
| 4074 | presurvey_arm_1 | 2 | 39 | 1 | 1 | 12 | 7 |
| 4075 | presurvey_arm_1 | 2 | 39 | 1 | 1 | 13 | 7 |
| 4076 | presurvey_arm_1 | 3 | 40 | 1 | 1 | 14 | 8 |
| 4077 | presurvey_arm_1 | 3 | 40 | 1 | 1 | 14 | 8 |
| 4078 | presurvey_arm_1 | 3 | 40 | 1 | 1 | 13 | 8 |
| 4079 | presurvey_arm_1 | 3 | 40 | 1 | 1 | 13 | 8 |
| 4080 | presurvey_arm_1 | 3 | 40 | 1 | 1 | 13 | 8 |
| 4081 | presurvey_arm_1 | 3 | 40 | 1 | 1 | 13 | 8 |

|      |                 |   |    |   |   |    |   |
|------|-----------------|---|----|---|---|----|---|
| 4082 | presurvey_arm_1 | 3 | 40 | 1 | 1 | 13 | 8 |
| 4083 | presurvey_arm_1 | 3 | 40 | 1 | 1 | 13 | 8 |
| 4084 | presurvey_arm_1 | 3 | 40 | 1 | 1 | 13 | 8 |
| 4085 | presurvey_arm_1 | 3 | 40 | 1 | 1 | 14 | 8 |
| 4086 | presurvey_arm_1 | 3 | 40 | 1 | 1 | 13 | 8 |
| 4087 | presurvey_arm_1 | 3 | 40 | 1 | 1 | 13 | 8 |
| 4088 | presurvey_arm_1 | 3 | 40 | 1 | 1 | 13 | 8 |
| 4089 | presurvey_arm_1 | 3 | 41 | 1 | 1 | 14 | 8 |
| 4090 | presurvey_arm_1 | 3 | 41 | 1 | 1 | 13 | 8 |
| 4091 | presurvey_arm_1 | 3 | 41 | 1 | 1 | 14 | 8 |
| 4092 | presurvey_arm_1 | 3 | 41 | 1 | 1 | 13 | 8 |
| 4093 | presurvey_arm_1 | 3 | 41 | 1 | 1 | 15 | 8 |
| 4094 | presurvey_arm_1 | 3 | 41 | 1 | 1 | 14 | 8 |
| 4095 | presurvey_arm_1 | 3 | 41 | 1 | 1 | 13 | 8 |
| 4096 | presurvey_arm_1 | 3 | 41 | 1 | 1 | 13 | 8 |
| 4097 | presurvey_arm_1 | 3 | 41 | 1 | 1 | 13 | 8 |
| 4098 | presurvey_arm_1 | 3 | 41 | 1 | 1 | 13 | 8 |
| 4099 | presurvey_arm_1 | 3 | 41 | 1 | 1 | 13 | 8 |
| 4100 | presurvey_arm_1 | 3 | 41 | 1 | 1 | 14 | 8 |
| 4101 | presurvey_arm_1 | 3 | 41 | 1 | 1 | 14 | 8 |
| 4102 | presurvey_arm_1 | 3 | 41 | 1 | 1 | 13 | 8 |
| 4103 | presurvey_arm_1 | 3 | 41 | 1 | 1 | 14 | 8 |
| 4104 | presurvey_arm_1 | 3 | 41 | 1 | 1 | 13 | 8 |
| 4105 | presurvey_arm_1 | 3 | 41 | 1 | 1 | 13 | 8 |
| 4186 | presurvey_arm_1 | 1 | 36 | 1 | 1 | 12 | 6 |
| 4187 | presurvey_arm_1 | 1 | 36 | 1 | 1 | 11 | 6 |
| 4188 | presurvey_arm_1 | 2 | 39 | 1 | 1 | 15 | 7 |
| 4189 | presurvey_arm_1 | 1 | 46 | 1 | 1 | 11 | 6 |
| 4190 | presurvey_arm_1 | 1 | 46 | 1 | 1 | 11 | 6 |
| 4191 | presurvey_arm_1 | 1 | 46 | 1 | 1 | 11 | 6 |
| 4192 | presurvey_arm_1 | 1 | 46 | 1 | 1 | 11 | 6 |
| 4193 | presurvey_arm_1 | 1 | 46 | 1 | 1 | 12 | 6 |
| 4194 | presurvey_arm_1 | 1 | 46 | 1 | 1 | 12 | 6 |
| 4195 | presurvey_arm_1 | 1 | 46 | 1 | 1 | 12 | 6 |
| 4196 | presurvey_arm_1 | 1 | 46 | 1 | 1 | 10 | 6 |
| 4197 | presurvey_arm_1 | 1 | 46 | 1 | 1 | 12 | 6 |
| 4198 | presurvey_arm_1 | 1 | 46 | 1 | 1 | 12 | 6 |
| 4199 | presurvey_arm_1 | 1 | 46 | 1 | 1 | 11 | 6 |
| 4200 | presurvey_arm_1 | 1 | 46 | 1 | 1 | 12 | 6 |
| 4201 | presurvey_arm_1 | 1 | 46 | 1 | 1 | 11 | 6 |
| 4202 | presurvey_arm_1 | 1 | 46 | 1 | 1 | 11 | 6 |
| 4203 | presurvey_arm_1 | 1 | 47 | 1 | 1 | 12 | 6 |
| 4204 | presurvey_arm_1 | 1 | 47 | 1 | 1 | 10 | 6 |
| 4205 | presurvey_arm_1 | 1 | 47 | 1 | 1 | 11 | 6 |
| 4206 | presurvey_arm_1 | 1 | 47 | 1 | 1 | 11 | 6 |
| 4207 | presurvey_arm_1 | 1 | 47 | 1 | 1 | 12 | 6 |
| 4208 | presurvey_arm_1 | 1 | 47 | 1 | 1 | 12 | 6 |
| 4209 | presurvey_arm_1 | 1 | 47 | 1 | 1 | 11 | 6 |

|      |                 |   |    |   |   |    |   |
|------|-----------------|---|----|---|---|----|---|
| 4210 | presurvey_arm_1 | 1 | 47 | 1 | 1 | 12 | 6 |
| 4211 | presurvey_arm_1 | 1 | 47 | 1 | 1 | 11 | 6 |
| 4212 | presurvey_arm_1 | 1 | 47 | 1 | 1 | 12 | 6 |
| 4213 | presurvey_arm_1 | 1 | 47 | 1 | 1 | 11 | 6 |
| 4214 | presurvey_arm_1 | 1 | 47 | 1 | 1 | 11 | 6 |
| 4215 | presurvey_arm_1 | 1 | 47 | 1 | 1 | 11 | 6 |
| 4216 | presurvey_arm_1 | 1 | 47 | 1 | 1 | 11 | 6 |
| 4217 | presurvey_arm_1 | 2 | 48 | 1 | 1 | 13 | 7 |
| 4218 | presurvey_arm_1 | 2 | 48 | 1 | 1 | 12 | 7 |
| 4219 | presurvey_arm_1 | 2 | 48 | 1 | 1 | 12 | 7 |
| 4220 | presurvey_arm_1 | 2 | 48 | 1 | 1 | 13 | 7 |
| 4221 | presurvey_arm_1 | 2 | 48 | 1 | 1 | 12 | 7 |
| 4222 | presurvey_arm_1 | 2 | 48 | 1 | 1 | 13 | 7 |
| 4223 | presurvey_arm_1 | 2 | 48 | 1 | 1 | 13 | 7 |
| 4224 | presurvey_arm_1 | 2 | 48 | 1 | 1 | 13 | 7 |
| 4225 | presurvey_arm_1 | 2 | 48 | 1 | 1 | 13 | 7 |
| 4226 | presurvey_arm_1 | 2 | 48 | 1 | 1 | 12 | 7 |
| 4227 | presurvey_arm_1 | 2 | 48 | 1 | 1 | 13 | 7 |
| 4228 | presurvey_arm_1 | 2 | 49 | 1 | 1 | 12 | 7 |
| 4229 | presurvey_arm_1 | 2 | 49 | 1 | 1 | 12 | 7 |
| 4230 | presurvey_arm_1 | 2 | 49 | 1 | 1 | 13 | 7 |
| 4231 | presurvey_arm_1 | 2 | 49 | 1 | 1 | 13 | 7 |
| 4232 | presurvey_arm_1 | 2 | 49 | 1 | 1 | 12 | 7 |
| 4233 | presurvey_arm_1 | 2 | 49 | 1 | 1 | 12 | 7 |
| 4234 | presurvey_arm_1 | 2 | 49 | 1 | 1 | 12 | 7 |
| 4235 | presurvey_arm_1 | 2 | 49 | 1 | 1 | 12 | 7 |
| 4236 | presurvey_arm_1 | 2 | 49 | 1 | 1 | 12 | 7 |
| 4237 | presurvey_arm_1 | 2 | 49 | 1 | 1 | 12 | 7 |
| 4238 | presurvey_arm_1 | 2 | 49 | 1 | 1 | 12 | 7 |
| 4239 | presurvey_arm_1 | 2 | 49 | 1 | 1 | 12 | 7 |
| 4240 | presurvey_arm_1 | 2 | 49 | 1 | 1 | 12 | 7 |
| 4241 | presurvey_arm_1 | 2 | 49 | 1 | 1 | 12 | 7 |
| 4242 | presurvey_arm_1 | 2 | 49 | 1 | 1 | 13 | 7 |
| 4243 | presurvey_arm_1 | 2 | 49 | 1 | 1 | 12 | 7 |
| 4244 | presurvey_arm_1 | 2 | 49 | 1 | 1 | 12 | 7 |
| 4245 | presurvey_arm_1 | 2 | 49 | 1 | 1 | 12 | 7 |
| 4246 | presurvey_arm_1 | 3 | 50 | 1 | 1 | 13 | 8 |
| 4247 | presurvey_arm_1 | 3 | 50 | 1 | 1 | 14 | 8 |
| 4248 | presurvey_arm_1 | 3 | 50 | 1 | 1 | 14 | 8 |
| 4249 | presurvey_arm_1 | 3 | 50 | 1 | 1 | 14 | 8 |
| 4250 | presurvey_arm_1 | 3 | 50 | 1 | 1 | 13 | 8 |
| 4251 | presurvey_arm_1 | 3 | 50 | 1 | 1 | 14 | 8 |
| 4252 | presurvey_arm_1 | 3 | 50 | 1 | 1 | 13 | 8 |
| 4253 | presurvey_arm_1 | 3 | 50 | 1 | 1 | 13 | 8 |
| 4254 | presurvey_arm_1 | 3 | 50 | 1 | 1 | 14 | 8 |
| 4255 | presurvey_arm_1 | 3 | 50 | 1 | 1 | 13 | 8 |
| 4256 | presurvey_arm_1 | 3 | 50 | 1 | 1 | 13 | 8 |
| 4257 | presurvey_arm_1 | 3 | 50 | 1 | 1 | 13 | 8 |

|      |                 |   |    |   |   |    |   |
|------|-----------------|---|----|---|---|----|---|
| 4258 | presurvey_arm_1 | 3 | 50 | 1 | 1 | 13 | 8 |
| 4259 | presurvey_arm_1 | 3 | 50 | 1 | 1 | 14 | 8 |
| 4260 | presurvey_arm_1 | 3 | 51 | 1 | 1 | 13 | 8 |
| 4261 | presurvey_arm_1 | 3 | 51 | 1 | 1 | 13 | 8 |
| 4262 | presurvey_arm_1 | 3 | 51 | 1 | 1 | 13 | 8 |
| 4263 | presurvey_arm_1 | 3 | 51 | 1 | 1 | 14 | 8 |
| 4264 | presurvey_arm_1 | 3 | 51 | 1 | 1 | 13 | 8 |
| 4265 | presurvey_arm_1 | 3 | 51 | 1 | 1 | 14 | 8 |
| 4266 | presurvey_arm_1 | 3 | 51 | 1 | 1 | 13 | 8 |
| 4267 | presurvey_arm_1 | 3 | 51 | 1 | 1 | 14 | 8 |
| 4268 | presurvey_arm_1 | 3 | 51 | 1 | 1 | 13 | 8 |
| 4269 | presurvey_arm_1 | 3 | 51 | 1 | 1 | 14 | 8 |
| 4270 | presurvey_arm_1 | 3 | 51 | 1 | 1 | 13 | 8 |
| 4271 | presurvey_arm_1 | 3 | 51 | 1 | 1 | 13 | 8 |
| 4272 | presurvey_arm_1 | 3 | 51 | 1 | 1 | 14 | 8 |
| 4273 | presurvey_arm_1 | 3 | 51 | 1 | 1 | 13 | 8 |
| 4274 | presurvey_arm_1 | 3 | 51 | 1 | 1 | 14 | 8 |
| 4275 | presurvey_arm_1 | 3 | 51 | 1 | 1 | 13 | 8 |
| 4276 | presurvey_arm_1 | 3 | 51 | 1 | 1 | 13 | 8 |
| 4358 | presurvey_arm_1 | 1 | 52 | 2 | 1 | 11 | 6 |
| 4359 | presurvey_arm_1 | 1 | 52 | 2 | 1 | 11 | 6 |
| 4360 | presurvey_arm_1 | 1 | 52 | 2 | 1 | 12 | 6 |
| 4361 | presurvey_arm_1 | 1 | 52 | 2 | 1 | 11 | 6 |
| 4362 | presurvey_arm_1 | 1 | 52 | 2 | 1 | 12 | 6 |
| 4363 | presurvey_arm_1 | 1 | 52 | 2 | 1 | 11 | 6 |
| 4364 | presurvey_arm_1 | 1 | 52 | 2 | 1 | 12 | 6 |
| 4365 | presurvey_arm_1 | 1 | 52 | 2 | 1 | 11 | 6 |
| 4366 | presurvey_arm_1 | 1 | 52 | 2 | 1 | 12 | 6 |
| 4367 | presurvey_arm_1 | 1 | 52 | 2 | 1 | 12 | 6 |
| 4368 | presurvey_arm_1 | 1 | 52 | 2 | 1 | 12 | 6 |
| 4369 | presurvey_arm_1 | 1 | 52 | 2 | 1 | 11 | 6 |
| 4370 | presurvey_arm_1 | 1 | 52 | 2 | 1 | 11 | 6 |
| 4371 | presurvey_arm_1 | 1 | 52 | 2 | 1 | 12 | 6 |
| 4372 | presurvey_arm_1 | 1 | 52 | 2 | 1 | 11 | 6 |
| 4373 | presurvey_arm_1 | 1 | 52 | 2 | 1 | 12 | 6 |
| 4374 | presurvey_arm_1 | 1 | 53 | 2 | 1 | 11 | 6 |
| 4375 | presurvey_arm_1 | 1 | 53 | 2 | 1 | 11 | 6 |
| 4376 | presurvey_arm_1 | 1 | 53 | 2 | 1 | 12 | 6 |
| 4377 | presurvey_arm_1 | 1 | 53 | 2 | 1 | 12 | 6 |
| 4378 | presurvey_arm_1 | 1 | 53 | 2 | 1 | 11 | 6 |
| 4379 | presurvey_arm_1 | 1 | 53 | 2 | 1 | 12 | 6 |
| 4380 | presurvey_arm_1 | 1 | 53 | 2 | 1 | 12 | 6 |
| 4381 | presurvey_arm_1 | 1 | 53 | 2 | 1 | 12 | 6 |
| 4382 | presurvey_arm_1 | 1 | 53 | 2 | 1 | 12 | 6 |
| 4383 | presurvey_arm_1 | 1 | 53 | 2 | 1 | 12 | 6 |
| 4384 | presurvey_arm_1 | 1 | 53 | 2 | 1 | 12 | 6 |
| 4385 | presurvey_arm_1 | 1 | 53 | 2 | 1 | 11 | 6 |
| 4386 | presurvey_arm_1 | 1 | 53 | 2 | 1 | 11 | 6 |



|      |                 |   |    |   |   |    |   |
|------|-----------------|---|----|---|---|----|---|
| 4387 | presurvey_arm_1 | 2 | 54 | 2 | 1 | 13 | 7 |
| 4388 | presurvey_arm_1 | 2 | 54 | 2 | 1 | 13 | 7 |
| 4389 | presurvey_arm_1 | 2 | 54 | 2 | 1 | 12 | 7 |
| 4390 | presurvey_arm_1 | 2 | 54 | 2 | 1 | 13 | 7 |
| 4391 | presurvey_arm_1 | 2 | 54 | 2 | 1 | 12 | 7 |
| 4392 | presurvey_arm_1 | 2 | 54 | 2 | 1 | 12 | 7 |
| 4393 | presurvey_arm_1 | 2 | 54 | 2 | 1 | 13 | 7 |
| 4394 | presurvey_arm_1 | 2 | 54 | 2 | 1 | 13 | 7 |
| 4395 | presurvey_arm_1 | 2 | 54 | 2 | 1 | 13 | 7 |
| 4396 | presurvey_arm_1 | 2 | 54 | 2 | 1 | 12 | 7 |
| 4397 | presurvey_arm_1 | 2 | 54 | 2 | 1 | 13 | 7 |
| 4398 | presurvey_arm_1 | 2 | 55 | 2 | 1 | 13 | 7 |
| 4399 | presurvey_arm_1 | 2 | 55 | 2 | 1 | 13 | 7 |
| 4400 | presurvey_arm_1 | 2 | 55 | 2 | 1 | 13 | 7 |
| 4401 | presurvey_arm_1 | 2 | 55 | 2 | 1 | 13 | 7 |
| 4402 | presurvey_arm_1 | 2 | 55 | 2 | 1 | 13 | 7 |
| 4403 | presurvey_arm_1 | 2 | 55 | 2 | 1 | 12 | 7 |
| 4404 | presurvey_arm_1 | 2 | 55 | 2 | 1 | 13 | 7 |
| 4405 | presurvey_arm_1 | 2 | 55 | 2 | 1 | 12 | 7 |
| 4406 | presurvey_arm_1 | 2 | 55 | 2 | 1 | 13 | 7 |
| 4407 | presurvey_arm_1 | 2 | 55 | 2 | 1 | 13 | 7 |
| 4408 | presurvey_arm_1 | 2 | 55 | 2 | 1 | 13 | 7 |
| 4409 | presurvey_arm_1 | 2 | 55 | 2 | 1 | 13 | 7 |
| 4410 | presurvey_arm_1 | 2 | 55 | 2 | 1 | 13 | 7 |
| 4411 | presurvey_arm_1 | 2 | 55 | 2 | 1 | 12 | 7 |
| 4412 | presurvey_arm_1 | 2 | 55 | 2 | 1 | 13 | 7 |
| 4413 | presurvey_arm_1 | 2 | 55 | 2 | 1 | 12 | 7 |
| 4414 | presurvey_arm_1 | 3 | 56 | 2 | 1 | 14 | 8 |
| 4415 | presurvey_arm_1 | 3 | 56 | 2 | 1 | 13 | 8 |
| 4416 | presurvey_arm_1 | 3 | 56 | 2 | 1 | 13 | 8 |
| 4417 | presurvey_arm_1 | 3 | 56 | 2 | 1 | 15 | 8 |
| 4418 | presurvey_arm_1 | 3 | 56 | 2 | 1 | 13 | 8 |
| 4419 | presurvey_arm_1 | 3 | 56 | 2 | 1 | 14 | 8 |
| 4420 | presurvey_arm_1 | 3 | 56 | 2 | 1 | 13 | 8 |
| 4421 | presurvey_arm_1 | 3 | 56 | 2 | 1 | 14 | 8 |
| 4422 | presurvey_arm_1 | 3 | 56 | 2 | 1 | 13 | 8 |
| 4423 | presurvey_arm_1 | 3 | 56 | 2 | 1 | 13 | 8 |
| 4424 | presurvey_arm_1 | 3 | 56 | 2 | 1 | 14 | 8 |
| 4425 | presurvey_arm_1 | 3 | 56 | 2 | 1 | 14 | 8 |
| 4426 | presurvey_arm_1 | 3 | 56 | 2 | 1 | 14 | 8 |
| 4427 | presurvey_arm_1 | 3 | 57 | 2 | 1 | 14 | 8 |
| 4428 | presurvey_arm_1 | 3 | 57 | 2 | 1 | 13 | 8 |
| 4429 | presurvey_arm_1 | 3 | 57 | 2 | 1 | 13 | 8 |
| 4430 | presurvey_arm_1 | 3 | 57 | 2 | 1 | 13 | 8 |
| 4431 | presurvey_arm_1 | 3 | 57 | 2 | 1 | 13 | 8 |
| 4432 | presurvey_arm_1 | 3 | 57 | 2 | 1 | 13 | 8 |
| 4433 | presurvey_arm_1 | 3 | 57 | 2 | 1 | 13 | 8 |
| 4434 | presurvey_arm_1 | 3 | 57 | 2 | 1 | 13 | 8 |

|      |                 |   |    |   |   |    |    |
|------|-----------------|---|----|---|---|----|----|
| 4435 | presurvey_arm_1 | 3 | 57 | 2 | 1 | 13 | 8  |
| 4436 | presurvey_arm_1 | 3 | 57 | 2 | 1 | 14 | 8  |
| 4437 | presurvey_arm_1 | 3 | 57 | 2 | 1 | 13 | 8  |
| 4438 | presurvey_arm_1 | 3 | 57 | 2 | 1 | 13 | 8  |
| 4439 | presurvey_arm_1 | 3 | 57 | 2 | 1 | 13 | 8  |
| 4440 | presurvey_arm_1 | 3 | 57 | 2 | 1 | 13 | 8  |
| 4441 | presurvey_arm_1 | 3 | 57 | 2 | 1 | 13 | 8  |
| 4442 | presurvey_arm_1 | 1 | 53 | 2 | 1 | 13 | 6  |
| 4443 | presurvey_arm_1 | 2 | 55 | 2 | 1 | 13 | 7  |
| 4444 | presurvey_arm_1 | 1 | 58 | 2 | 1 | 11 | 6  |
| 4445 | presurvey_arm_1 | 1 | 58 | 2 | 1 | 12 | 6  |
| 4446 | presurvey_arm_1 | 1 | 58 | 2 | 1 | 11 | 6  |
| 4447 | presurvey_arm_1 | 1 | 58 | 2 | 1 | 11 | 6  |
| 4448 | presurvey_arm_1 | 1 | 58 | 2 | 1 | 11 | 6  |
| 4449 | presurvey_arm_1 | 1 | 58 | 2 | 1 | 11 | 6  |
| 4450 | presurvey_arm_1 | 1 | 58 | 2 | 1 | 12 | 6  |
| 4451 | presurvey_arm_1 | 1 | 58 | 2 | 1 | 12 | 6  |
| 4452 | presurvey_arm_1 | 1 | 58 | 2 | 1 | 12 | 6  |
| 4453 | presurvey_arm_1 | 1 | 58 | 2 | 1 | 11 | 6  |
| 4454 | presurvey_arm_1 | 1 | 58 | 2 | 1 | 11 | 6  |
| 4455 | presurvey_arm_1 | 1 | 58 | 2 | 1 | 11 | 6  |
| 4456 | presurvey_arm_1 | 1 | 58 | 2 | 1 | 11 | 6  |
| 4457 | presurvey_arm_1 | 1 | 58 | 2 | 1 | 12 | 6  |
| 4458 | presurvey_arm_1 | 1 | 58 | 2 | 1 | 12 | 6  |
| 4459 | presurvey_arm_1 | 1 | 59 | 2 | 1 | 12 | 6  |
| 4460 | presurvey_arm_1 | 1 | 59 | 2 | 1 | 11 | 6  |
| 4461 | presurvey_arm_1 | 1 | 59 | 2 | 1 | 11 | 6  |
| 4462 | presurvey_arm_1 | 1 | 59 | 2 | 1 | 11 | 6  |
| 4463 | presurvey_arm_1 | 1 | 59 | 2 | 1 | 12 | 6  |
| 4464 | presurvey_arm_1 | 1 | 59 | 2 | 1 | 11 | 99 |
| 4465 | presurvey_arm_1 | 1 | 59 | 2 | 1 | 12 | 6  |
| 4466 | presurvey_arm_1 | 1 | 59 | 2 | 1 | 11 | 6  |
| 4467 | presurvey_arm_1 | 1 | 59 | 2 | 1 | 11 | 6  |
| 4468 | presurvey_arm_1 | 1 | 59 | 2 | 1 | 12 | 6  |
| 4469 | presurvey_arm_1 | 1 | 59 | 2 | 1 | 11 | 6  |
| 4470 | presurvey_arm_1 | 1 | 59 | 2 | 1 | 12 | 6  |
| 4471 | presurvey_arm_1 | 1 | 59 | 2 | 1 | 12 | 6  |
| 4472 | presurvey_arm_1 | 2 | 60 | 2 | 1 | 13 | 7  |
| 4473 | presurvey_arm_1 | 2 | 60 | 2 | 1 | 12 | 7  |
| 4474 | presurvey_arm_1 | 2 | 60 | 2 | 1 | 13 | 7  |
| 4475 | presurvey_arm_1 | 2 | 60 | 2 | 1 | 13 | 7  |
| 4476 | presurvey_arm_1 | 2 | 60 | 2 | 1 | 12 | 7  |
| 4477 | presurvey_arm_1 | 2 | 60 | 2 | 1 | 12 | 7  |
| 4478 | presurvey_arm_1 | 2 | 60 | 2 | 1 | 13 | 7  |
| 4479 | presurvey_arm_1 | 2 | 60 | 2 | 1 | 13 | 7  |
| 4480 | presurvey_arm_1 | 2 | 60 | 2 | 1 | 12 | 7  |
| 4481 | presurvey_arm_1 | 2 | 61 | 2 | 1 | 13 | 7  |
| 4482 | presurvey_arm_1 | 2 | 61 | 2 | 1 | 12 | 7  |

|      |                 |   |    |   |   |    |   |
|------|-----------------|---|----|---|---|----|---|
| 4483 | presurvey_arm_1 | 2 | 61 | 2 | 1 | 12 | 7 |
| 4484 | presurvey_arm_1 | 2 | 61 | 2 | 1 | 13 | 7 |
| 4485 | presurvey_arm_1 | 2 | 61 | 2 | 1 | 13 | 7 |
| 4486 | presurvey_arm_1 | 2 | 61 | 2 | 1 | 12 | 7 |
| 4487 | presurvey_arm_1 | 2 | 61 | 2 | 1 | 12 | 7 |
| 4488 | presurvey_arm_1 | 2 | 61 | 2 | 1 | 13 | 7 |
| 4489 | presurvey_arm_1 | 2 | 61 | 2 | 1 | 13 | 7 |
| 4490 | presurvey_arm_1 | 2 | 61 | 2 | 1 | 13 | 7 |
| 4491 | presurvey_arm_1 | 2 | 61 | 2 | 1 | 13 | 7 |
| 4492 | presurvey_arm_1 | 2 | 61 | 2 | 1 | 12 | 7 |
| 4493 | presurvey_arm_1 | 2 | 61 | 2 | 1 | 13 | 7 |
| 4494 | presurvey_arm_1 | 2 | 61 | 2 | 1 | 13 | 7 |
| 4495 | presurvey_arm_1 | 3 | 62 | 2 | 1 | 14 | 8 |
| 4496 | presurvey_arm_1 | 3 | 62 | 2 | 1 | 14 | 8 |
| 4497 | presurvey_arm_1 | 3 | 62 | 2 | 1 | 14 | 8 |
| 4498 | presurvey_arm_1 | 3 | 62 | 2 | 1 | 14 | 8 |
| 4499 | presurvey_arm_1 | 3 | 62 | 2 | 1 | 14 | 8 |
| 4500 | presurvey_arm_1 | 3 | 62 | 2 | 1 | 14 | 8 |
| 4501 | presurvey_arm_1 | 3 | 62 | 2 | 1 | 13 | 8 |
| 4502 | presurvey_arm_1 | 3 | 62 | 2 | 1 | 14 | 8 |
| 4503 | presurvey_arm_1 | 3 | 62 | 2 | 1 | 14 | 8 |
| 4504 | presurvey_arm_1 | 3 | 62 | 2 | 1 | 13 | 8 |
| 4505 | presurvey_arm_1 | 3 | 63 | 2 | 1 | 14 | 8 |
| 4506 | presurvey_arm_1 | 3 | 63 | 2 | 1 | 14 | 8 |
| 4507 | presurvey_arm_1 | 3 | 63 | 2 | 1 | 13 | 8 |
| 4508 | presurvey_arm_1 | 3 | 63 | 2 | 1 | 14 | 8 |
| 4509 | presurvey_arm_1 | 3 | 63 | 2 | 1 | 15 | 8 |
| 4510 | presurvey_arm_1 | 3 | 63 | 2 | 1 | 14 | 8 |
| 4511 | presurvey_arm_1 | 3 | 63 | 2 | 1 | 14 | 8 |
| 4512 | presurvey_arm_1 | 3 | 63 | 2 | 1 | 14 | 8 |
| 4513 | presurvey_arm_1 | 3 | 63 | 2 | 1 | 14 | 8 |
| 4514 | presurvey_arm_1 | 3 | 63 | 2 | 1 | 13 | 8 |
| 4515 | presurvey_arm_1 | 3 | 63 | 2 | 1 | 14 | 8 |
| 4516 | presurvey_arm_1 | 3 | 63 | 2 | 1 | 13 | 8 |
| 4517 | presurvey_arm_1 | 3 | 63 | 2 | 1 | 13 | 8 |
| 4518 | presurvey_arm_1 | 3 | 63 | 2 | 1 | 14 | 8 |
| 4519 | presurvey_arm_1 | 3 | 63 | 2 | 1 | 13 | 8 |
| 4520 | presurvey_arm_1 | 1 | 72 | 2 | 1 | 12 | 7 |
| 4521 | presurvey_arm_1 | 1 | 72 | 2 | 1 | 12 | 6 |
| 4522 | presurvey_arm_1 | 1 | 72 | 2 | 1 | 12 | 6 |
| 4523 | presurvey_arm_1 | 1 | 72 | 2 | 1 | 12 | 6 |
| 4524 | presurvey_arm_1 | 1 | 72 | 2 | 1 | 12 | 6 |
| 4525 | presurvey_arm_1 | 1 | 72 | 2 | 1 | 12 | 6 |
| 4526 | presurvey_arm_1 | 1 | 72 | 2 | 1 | 12 | 6 |
| 4527 | presurvey_arm_1 | 1 | 72 | 2 | 1 | 12 | 6 |
| 4528 | presurvey_arm_1 | 1 | 72 | 2 | 1 | 12 | 6 |
| 4529 | presurvey_arm_1 | 1 | 72 | 2 | 1 | 12 | 6 |
| 4530 | presurvey_arm_1 | 1 | 72 | 2 | 1 | 12 | 6 |

|      |                 |   |    |   |   |    |   |
|------|-----------------|---|----|---|---|----|---|
| 4531 | presurvey_arm_1 | 1 | 72 | 2 | 1 | 12 | 6 |
| 4532 | presurvey_arm_1 | 1 | 72 | 2 | 1 | 12 | 7 |
| 4533 | presurvey_arm_1 | 1 | 72 | 2 | 1 | 12 | 6 |
| 4534 | presurvey_arm_1 | 1 | 72 | 2 | 1 | 13 | 6 |
| 4535 | presurvey_arm_1 | 1 | 73 | 2 | 1 | 11 | 6 |
| 4536 | presurvey_arm_1 | 1 | 73 | 2 | 1 | 11 | 6 |
| 4537 | presurvey_arm_1 | 1 | 73 | 2 | 1 | 12 | 6 |
| 4538 | presurvey_arm_1 | 1 | 73 | 2 | 1 | 11 | 6 |
| 4539 | presurvey_arm_1 | 1 | 73 | 2 | 1 | 12 | 6 |
| 4540 | presurvey_arm_1 | 1 | 73 | 2 | 1 | 11 | 6 |
| 4541 | presurvey_arm_1 | 1 | 73 | 2 | 1 | 12 | 6 |
| 4542 | presurvey_arm_1 | 1 | 73 | 2 | 1 | 11 | 6 |
| 4543 | presurvey_arm_1 | 1 | 73 | 2 | 1 | 13 | 6 |
| 4544 | presurvey_arm_1 | 1 | 73 | 2 | 1 | 12 | 6 |
| 4545 | presurvey_arm_1 | 1 | 73 | 2 | 1 | 11 | 6 |
| 4546 | presurvey_arm_1 | 1 | 73 | 2 | 1 | 13 | 6 |
| 4547 | presurvey_arm_1 | 2 | 74 | 2 | 1 | 12 | 7 |
| 4548 | presurvey_arm_1 | 2 | 74 | 2 | 1 | 13 | 7 |
| 4549 | presurvey_arm_1 | 2 | 74 | 2 | 1 | 12 | 7 |
| 4550 | presurvey_arm_1 | 2 | 74 | 2 | 1 | 12 | 7 |
| 4551 | presurvey_arm_1 | 2 | 74 | 2 | 1 | 13 | 7 |
| 4552 | presurvey_arm_1 | 2 | 74 | 2 | 1 | 12 | 7 |
| 4553 | presurvey_arm_1 | 2 | 74 | 2 | 1 | 13 | 7 |
| 4554 | presurvey_arm_1 | 2 | 74 | 2 | 1 | 13 | 7 |
| 4555 | presurvey_arm_1 | 2 | 74 | 2 | 1 | 13 | 7 |
| 4556 | presurvey_arm_1 | 2 | 75 | 2 | 1 | 14 | 7 |
| 4557 | presurvey_arm_1 | 2 | 75 | 2 | 1 | 13 | 7 |
| 4558 | presurvey_arm_1 | 2 | 75 | 2 | 1 | 12 | 7 |
| 4559 | presurvey_arm_1 | 2 | 75 | 2 | 1 | 13 | 7 |
| 4560 | presurvey_arm_1 | 2 | 75 | 2 | 1 | 13 | 7 |
| 4561 | presurvey_arm_1 | 2 | 75 | 2 | 1 | 13 | 7 |
| 4562 | presurvey_arm_1 | 2 | 75 | 2 | 1 | 13 | 7 |
| 4563 | presurvey_arm_1 | 2 | 75 | 2 | 1 | 13 | 7 |
| 4564 | presurvey_arm_1 | 2 | 75 | 2 | 1 | 13 | 7 |
| 4565 | presurvey_arm_1 | 2 | 75 | 2 | 1 | 13 | 7 |
| 4566 | presurvey_arm_1 | 2 | 75 | 2 | 1 | 13 | 7 |
| 4567 | presurvey_arm_1 | 2 | 75 | 2 | 1 | 13 | 7 |
| 4568 | presurvey_arm_1 | 2 | 75 | 2 | 1 | 13 | 7 |
| 4569 | presurvey_arm_1 | 2 | 75 | 2 | 1 | 13 | 7 |
| 4570 | presurvey_arm_1 | 2 | 75 | 2 | 1 | 13 | 7 |
| 4571 | presurvey_arm_1 | 3 | 76 | 2 | 1 | 13 | 8 |
| 4572 | presurvey_arm_1 | 3 | 76 | 2 | 1 | 13 | 8 |
| 4573 | presurvey_arm_1 | 3 | 76 | 2 | 1 | 14 | 8 |
| 4574 | presurvey_arm_1 | 3 | 76 | 2 | 1 | 13 | 8 |
| 4575 | presurvey_arm_1 | 3 | 76 | 2 | 1 | 14 | 8 |
| 4576 | presurvey_arm_1 | 3 | 76 | 2 | 1 | 14 | 8 |
| 4577 | presurvey_arm_1 | 3 | 76 | 2 | 1 | 13 | 8 |
| 4578 | presurvey_arm_1 | 3 | 76 | 2 | 1 | 14 | 8 |

|      |                 |   |    |   |   |    |   |
|------|-----------------|---|----|---|---|----|---|
| 4579 | presurvey_arm_1 | 3 | 76 | 2 | 1 | 14 | 8 |
| 4580 | presurvey_arm_1 | 3 | 77 | 2 | 1 | 13 | 8 |
| 4581 | presurvey_arm_1 | 3 | 77 | 2 | 1 | 14 | 8 |
| 4582 | presurvey_arm_1 | 3 | 77 | 2 | 1 | 14 | 8 |
| 4583 | presurvey_arm_1 | 3 | 77 | 2 | 1 | 13 | 8 |
| 4584 | presurvey_arm_1 | 3 | 77 | 2 | 1 | 14 | 8 |
| 4585 | presurvey_arm_1 | 3 | 77 | 2 | 1 | 14 | 8 |
| 4586 | presurvey_arm_1 | 3 | 77 | 2 | 1 | 14 | 8 |
| 4587 | presurvey_arm_1 | 3 | 77 | 2 | 1 | 13 | 8 |
| 4588 | presurvey_arm_1 | 3 | 77 | 2 | 1 | 14 | 8 |
| 4589 | presurvey_arm_1 | 3 | 77 | 2 | 1 | 15 | 8 |
| 4590 | presurvey_arm_1 | 3 | 77 | 2 | 1 | 14 | 8 |
| 4591 | presurvey_arm_1 | 3 | 77 | 2 | 1 | 14 | 8 |
| 4592 | presurvey_arm_1 | 3 | 77 | 2 | 1 | 13 | 8 |
| 4593 | presurvey_arm_1 | 3 | 77 | 2 | 1 | 14 | 8 |
| 4594 | presurvey_arm_1 | 3 | 77 | 2 | 1 | 13 | 8 |
| 4595 | presurvey_arm_1 | 3 | 77 | 2 | 1 | 14 | 8 |
| 4596 | presurvey_arm_1 | 3 | 77 | 2 | 1 | 13 | 8 |
| 4597 | presurvey_arm_1 | 3 | 77 | 2 | 1 | 14 | 8 |
| 4598 | presurvey_arm_1 | 1 | 78 | 2 | 1 | 12 | 6 |
| 4599 | presurvey_arm_1 | 1 | 78 | 2 | 1 | 12 | 6 |
| 4600 | presurvey_arm_1 | 1 | 78 | 2 | 1 | 12 | 6 |
| 4601 | presurvey_arm_1 | 1 | 78 | 2 | 1 | 12 | 6 |
| 4602 | presurvey_arm_1 | 1 | 78 | 2 | 1 | 12 | 6 |
| 4603 | presurvey_arm_1 | 1 | 78 | 2 | 1 | 12 | 6 |
| 4604 | presurvey_arm_1 | 1 | 78 | 2 | 1 | 12 | 6 |
| 4605 | presurvey_arm_1 | 1 | 78 | 2 | 1 | 11 | 6 |
| 4606 | presurvey_arm_1 | 1 | 78 | 2 | 1 | 12 | 6 |
| 4607 | presurvey_arm_1 | 1 | 78 | 2 | 1 | 12 | 6 |
| 4608 | presurvey_arm_1 | 1 | 78 | 2 | 1 | 12 | 6 |
| 4609 | presurvey_arm_1 | 1 | 78 | 2 | 1 | 11 | 6 |
| 4610 | presurvey_arm_1 | 1 | 78 | 2 | 1 | 12 | 6 |
| 4611 | presurvey_arm_1 | 1 | 78 | 2 | 1 | 12 | 6 |
| 4612 | presurvey_arm_1 | 1 | 78 | 2 | 1 | 11 | 6 |
| 4613 | presurvey_arm_1 | 1 | 79 | 2 | 1 | 12 | 6 |
| 4614 | presurvey_arm_1 | 1 | 79 | 2 | 1 | 12 | 6 |
| 4615 | presurvey_arm_1 | 1 | 79 | 2 | 1 | 11 | 6 |
| 4616 | presurvey_arm_1 | 1 | 79 | 2 | 1 | 12 | 6 |
| 4617 | presurvey_arm_1 | 1 | 79 | 2 | 1 | 12 | 6 |
| 4618 | presurvey_arm_1 | 1 | 79 | 2 | 1 | 12 | 6 |
| 4619 | presurvey_arm_1 | 1 | 79 | 2 | 1 | 12 | 6 |
| 4620 | presurvey_arm_1 | 1 | 79 | 2 | 1 | 12 | 6 |
| 4621 | presurvey_arm_1 | 1 | 79 | 2 | 1 | 12 | 6 |
| 4622 | presurvey_arm_1 | 1 | 79 | 2 | 1 | 11 | 6 |
| 4623 | presurvey_arm_1 | 1 | 79 | 2 | 1 | 12 | 6 |
| 4624 | presurvey_arm_1 | 1 | 79 | 2 | 1 | 11 | 6 |
| 4625 | presurvey_arm_1 | 1 | 79 | 2 | 1 | 12 | 6 |
| 4626 | presurvey_arm_1 | 1 | 79 | 2 | 1 | 12 | 6 |

|      |                 |   |    |   |   |    |   |
|------|-----------------|---|----|---|---|----|---|
| 4627 | presurvey_arm_1 | 2 | 80 | 2 | 1 | 12 | 7 |
| 4628 | presurvey_arm_1 | 2 | 80 | 2 | 1 | 13 | 7 |
| 4629 | presurvey_arm_1 | 2 | 80 | 2 | 1 | 13 | 7 |
| 4630 | presurvey_arm_1 | 2 | 80 | 2 | 1 | 13 | 7 |
| 4631 | presurvey_arm_1 | 2 | 80 | 2 | 1 | 14 | 7 |
| 4632 | presurvey_arm_1 | 2 | 80 | 2 | 1 | 13 | 7 |
| 4633 | presurvey_arm_1 | 2 | 80 | 2 | 1 | 13 | 7 |
| 4634 | presurvey_arm_1 | 2 | 80 | 2 | 1 | 13 | 7 |
| 4635 | presurvey_arm_1 | 2 | 80 | 2 | 1 | 12 | 7 |
| 4636 | presurvey_arm_1 | 2 | 81 | 2 | 1 | 12 | 7 |
| 4637 | presurvey_arm_1 | 2 | 81 | 2 | 1 | 13 | 7 |
| 4638 | presurvey_arm_1 | 2 | 81 | 2 | 1 | 13 | 7 |
| 4639 | presurvey_arm_1 | 2 | 81 | 2 | 1 | 13 | 7 |
| 4640 | presurvey_arm_1 | 2 | 81 | 2 | 1 | 13 | 7 |
| 4641 | presurvey_arm_1 | 2 | 81 | 2 | 1 | 99 | 7 |
| 4642 | presurvey_arm_1 | 2 | 81 | 2 | 1 | 13 | 7 |
| 4643 | presurvey_arm_1 | 2 | 81 | 2 | 1 | 13 | 7 |
| 4644 | presurvey_arm_1 | 2 | 81 | 2 | 1 | 12 | 7 |
| 4645 | presurvey_arm_1 | 2 | 81 | 2 | 1 | 12 | 7 |
| 4646 | presurvey_arm_1 | 2 | 81 | 2 | 1 | 13 | 7 |
| 4647 | presurvey_arm_1 | 2 | 81 | 2 | 1 | 13 | 7 |
| 4648 | presurvey_arm_1 | 2 | 81 | 2 | 1 | 13 | 7 |
| 4649 | presurvey_arm_1 | 2 | 81 | 2 | 1 | 13 | 7 |
| 4650 | presurvey_arm_1 | 3 | 82 | 2 | 1 | 14 | 8 |
| 4651 | presurvey_arm_1 | 3 | 82 | 2 | 1 | 15 | 8 |
| 4652 | presurvey_arm_1 | 3 | 82 | 2 | 1 | 14 | 8 |
| 4653 | presurvey_arm_1 | 3 | 82 | 2 | 1 | 15 | 8 |
| 4654 | presurvey_arm_1 | 3 | 82 | 2 | 1 | 15 | 8 |
| 4655 | presurvey_arm_1 | 3 | 82 | 2 | 1 | 13 | 8 |
| 4656 | presurvey_arm_1 | 3 | 82 | 2 | 1 | 14 | 8 |
| 4657 | presurvey_arm_1 | 3 | 82 | 2 | 1 | 13 | 8 |
| 4658 | presurvey_arm_1 | 3 | 82 | 2 | 1 | 14 | 8 |
| 4659 | presurvey_arm_1 | 3 | 82 | 2 | 1 | 13 | 8 |
| 4660 | presurvey_arm_1 | 3 | 82 | 2 | 1 | 14 | 8 |
| 4661 | presurvey_arm_1 | 3 | 82 | 2 | 1 | 14 | 8 |
| 4662 | presurvey_arm_1 | 3 | 82 | 2 | 1 | 14 | 8 |
| 4663 | presurvey_arm_1 | 3 | 82 | 2 | 1 | 14 | 8 |
| 4664 | presurvey_arm_1 | 3 | 83 | 2 | 1 | 14 | 8 |
| 4665 | presurvey_arm_1 | 3 | 83 | 2 | 1 | 14 | 8 |
| 4666 | presurvey_arm_1 | 3 | 83 | 2 | 1 | 14 | 8 |
| 4667 | presurvey_arm_1 | 3 | 83 | 2 | 1 | 14 | 8 |
| 4668 | presurvey_arm_1 | 3 | 83 | 2 | 1 | 15 | 8 |
| 4669 | presurvey_arm_1 | 3 | 83 | 2 | 1 | 15 | 8 |
| 4670 | presurvey_arm_1 | 3 | 83 | 2 | 1 | 14 | 8 |
| 4671 | presurvey_arm_1 | 3 | 83 | 2 | 1 | 14 | 8 |
| 4672 | presurvey_arm_1 | 3 | 83 | 2 | 1 | 13 | 8 |
| 4673 | presurvey_arm_1 | 3 | 83 | 2 | 1 | 14 | 8 |
| 4674 | presurvey_arm_1 | 3 | 83 | 2 | 1 | 14 | 8 |

|      |                 |        |        |   |        |    |   |
|------|-----------------|--------|--------|---|--------|----|---|
| 4675 | presurvey_arm_1 | 3      | 83     | 2 | 1      | 13 | 8 |
| 4676 | presurvey_arm_1 | 3      | 83     | 2 | 1      | 15 | 8 |
| 4677 | presurvey_arm_1 | 3      | 83     | 2 | 1      | 14 | 8 |
| 4985 | presurvey_arm_1 | #NULL! | #NULL! | 5 | 1      | 12 | 7 |
| 4986 | presurvey_arm_1 | #NULL! | #NULL! | 5 | 1      | 13 | 8 |
| 4987 | presurvey_arm_1 | #NULL! | #NULL! | 5 | 1      | 13 | 8 |
| 4988 | presurvey_arm_1 | #NULL! | #NULL! | 5 | 1      | 13 | 8 |
| 4989 | presurvey_arm_1 | #NULL! | #NULL! | 5 | 1      | 13 | 8 |
| 4990 | presurvey_arm_1 | #NULL! | #NULL! | 5 | 1      | 14 | 8 |
| 4991 | presurvey_arm_1 | #NULL! | #NULL! | 5 | 1      | 14 | 8 |
| 4992 | presurvey_arm_1 | #NULL! | #NULL! | 5 | 1      | 13 | 8 |
| 4993 | presurvey_arm_1 | #NULL! | #NULL! | 5 | 1      | 13 | 8 |
| 4994 | presurvey_arm_1 | #NULL! | #NULL! | 5 | 1      | 13 | 8 |
| 4995 | presurvey_arm_1 | #NULL! | #NULL! | 5 | 1      | 14 | 8 |
| 4996 | presurvey_arm_1 | #NULL! | #NULL! | 5 | 1      | 13 | 8 |
| 4997 | presurvey_arm_1 | #NULL! | #NULL! | 5 | 1      | 14 | 8 |
| 4998 | presurvey_arm_1 | #NULL! | #NULL! | 5 | 1      | 13 | 8 |
| 4999 | presurvey_arm_1 | #NULL! | #NULL! | 5 | 1      | 13 | 8 |
| 5000 | presurvey_arm_1 | #NULL! | #NULL! | 5 | 1      | 13 | 8 |
| 5001 | presurvey_arm_1 | #NULL! | #NULL! | 5 | 1      | 14 | 8 |
| 5002 | presurvey_arm_1 | #NULL! | #NULL! | 5 | 1      | 13 | 8 |
| 5003 | presurvey_arm_1 | #NULL! | #NULL! | 5 | 1      | 13 | 8 |
| 5004 | presurvey_arm_1 | #NULL! | #NULL! | 5 | 1      | 13 | 8 |
| 5005 | presurvey_arm_1 | #NULL! | #NULL! | 5 | 1      | 13 | 8 |
| 5006 | presurvey_arm_1 | #NULL! | #NULL! | 5 | 1      | 14 | 8 |
| 5007 | presurvey_arm_1 | #NULL! | #NULL! | 5 | 1      | 13 | 8 |
| 5008 | presurvey_arm_1 | #NULL! | #NULL! | 5 | 1      | 13 | 8 |
| 5009 | presurvey_arm_1 | #NULL! | #NULL! | 5 | 1      | 13 | 8 |
| 5010 | presurvey_arm_1 | #NULL! | #NULL! | 5 | 1      | 13 | 8 |
| 5011 | presurvey_arm_1 | #NULL! | #NULL! | 5 | #NULL! | 13 | 8 |
| 5012 | presurvey_arm_1 | #NULL! | #NULL! | 5 | 1      | 13 | 8 |
| 5013 | presurvey_arm_1 | #NULL! | #NULL! | 5 | 1      | 13 | 8 |
| 5014 | presurvey_arm_1 | #NULL! | #NULL! | 5 | 1      | 13 | 8 |
| 5015 | presurvey_arm_1 | #NULL! | #NULL! | 5 | 1      | 13 | 8 |
| 5016 | presurvey_arm_1 | #NULL! | #NULL! | 5 | 1      | 13 | 8 |
| 5017 | presurvey_arm_1 | #NULL! | #NULL! | 5 | 1      | 14 | 8 |
| 5018 | presurvey_arm_1 | #NULL! | #NULL! | 5 | 1      | 13 | 8 |
| 5019 | presurvey_arm_1 | #NULL! | #NULL! | 5 | 1      | 13 | 8 |
| 5020 | presurvey_arm_1 | #NULL! | #NULL! | 5 | 1      | 13 | 8 |
| 5021 | presurvey_arm_1 | #NULL! | #NULL! | 5 | 1      | 14 | 8 |
| 5022 | presurvey_arm_1 | #NULL! | #NULL! | 5 | 1      | 13 | 8 |
| 5023 | presurvey_arm_1 | #NULL! | #NULL! | 5 | 1      | 12 | 7 |
| 5024 | presurvey_arm_1 | #NULL! | #NULL! | 5 | 1      | 13 | 7 |
| 5025 | presurvey_arm_1 | #NULL! | #NULL! | 5 | 1      | 12 | 7 |
| 5026 | presurvey_arm_1 | #NULL! | #NULL! | 5 | 1      | 13 | 7 |
| 5027 | presurvey_arm_1 | #NULL! | #NULL! | 5 | 1      | 12 | 7 |
| 5028 | presurvey_arm_1 | #NULL! | #NULL! | 5 | 1      | 13 | 8 |
| 5029 | presurvey_arm_1 | #NULL! | #NULL! | 5 | 1      | 13 | 7 |

|      |                 |        |        |     |        |    |   |
|------|-----------------|--------|--------|-----|--------|----|---|
| 5030 | presurvey_arm_1 | #NULL! | #NULL! | 5   | 1      | 12 | 7 |
| 5031 | presurvey_arm_1 | #NULL! | #NULL! | 5   | 1      | 12 | 7 |
| 5032 | presurvey_arm_1 | #NULL! | #NULL! | 5   | 1      | 13 | 7 |
| 5033 | presurvey_arm_1 | #NULL! | #NULL! | 5   | 1      | 11 | 7 |
| 5034 | presurvey_arm_1 | #NULL! | #NULL! | 5   | 1      | 13 | 7 |
| 5035 | presurvey_arm_1 | #NULL! | #NULL! | 5   | 1      | 12 | 7 |
| 5036 | presurvey_arm_1 | #NULL! | #NULL! | 5   | 1      | 12 | 7 |
| 5037 | presurvey_arm_1 | #NULL! | #NULL! | 5   | 1      | 12 | 7 |
| 5038 | presurvey_arm_1 | #NULL! | #NULL! | 999 | #NULL! | 12 | 7 |
| 5039 | presurvey_arm_1 | #NULL! | #NULL! | 5   | 1      | 12 | 7 |
| 5040 | presurvey_arm_1 | #NULL! | #NULL! | 999 | #NULL! | 12 | 7 |
| 5041 | presurvey_arm_1 | #NULL! | #NULL! | 5   | 1      | 12 | 7 |
| 5042 | presurvey_arm_1 | #NULL! | #NULL! | 5   | 1      | 12 | 7 |
| 5043 | presurvey_arm_1 | #NULL! | #NULL! | 999 | #NULL! | 12 | 7 |
| 5044 | presurvey_arm_1 | #NULL! | #NULL! | 5   | 1      | 12 | 7 |
| 5045 | presurvey_arm_1 | #NULL! | #NULL! | 5   | 1      | 12 | 8 |
| 5046 | presurvey_arm_1 | #NULL! | #NULL! | 5   | 1      | 12 | 7 |
| 5047 | presurvey_arm_1 | #NULL! | #NULL! | 5   | 1      | 12 | 7 |
| 5048 | presurvey_arm_1 | #NULL! | #NULL! | 5   | 1      | 12 | 7 |
| 5049 | presurvey_arm_1 | #NULL! | #NULL! | 5   | #NULL! | 12 | 7 |
| 5050 | presurvey_arm_1 | #NULL! | #NULL! | 999 | 1      | 12 | 7 |
| 5051 | presurvey_arm_1 | #NULL! | #NULL! | 5   | 1      | 13 | 7 |
| 5052 | presurvey_arm_1 | #NULL! | #NULL! | 999 | 1      | 12 | 7 |
| 5053 | presurvey_arm_1 | #NULL! | #NULL! | 5   | 1      | 12 | 7 |
| 5054 | presurvey_arm_1 | #NULL! | #NULL! | 999 | #NULL! | 13 | 8 |
| 5055 | presurvey_arm_1 | #NULL! | #NULL! | 5   | 1      | 13 | 8 |
| 5056 | presurvey_arm_1 | #NULL! | #NULL! | 5   | 1      | 13 | 8 |
| 5057 | presurvey_arm_1 | #NULL! | #NULL! | 5   | 1      | 11 | 6 |
| 5058 | presurvey_arm_1 | #NULL! | #NULL! | 5   | 1      | 11 | 6 |
| 5059 | presurvey_arm_1 | #NULL! | #NULL! | 999 | #NULL! | 11 | 6 |
| 5060 | presurvey_arm_1 | #NULL! | #NULL! | 5   | 1      | 11 | 6 |
| 5061 | presurvey_arm_1 | #NULL! | #NULL! | 5   | 1      | 11 | 6 |
| 5062 | presurvey_arm_1 | #NULL! | #NULL! | 5   | 1      | 12 | 6 |
| 5063 | presurvey_arm_1 | #NULL! | #NULL! | 5   | 1      | 11 | 6 |
| 5064 | presurvey_arm_1 | #NULL! | #NULL! | 5   | 1      | 11 | 6 |
| 5065 | presurvey_arm_1 | #NULL! | #NULL! | 999 | 1      | 11 | 6 |
| 5066 | presurvey_arm_1 | #NULL! | #NULL! | 5   | 1      | 11 | 6 |
| 5067 | presurvey_arm_1 | #NULL! | #NULL! | 5   | 1      | 11 | 6 |
| 5068 | presurvey_arm_1 | #NULL! | #NULL! | 5   | 1      | 11 | 6 |
| 5069 | presurvey_arm_1 | #NULL! | #NULL! | 5   | 1      | 12 | 6 |
| 5070 | presurvey_arm_1 | #NULL! | #NULL! | 5   | 1      | 11 | 6 |
| 5071 | presurvey_arm_1 | #NULL! | #NULL! | 5   | 1      | 11 | 6 |
| 5072 | presurvey_arm_1 | #NULL! | #NULL! | 5   | 1      | 11 | 6 |
| 5073 | presurvey_arm_1 | #NULL! | #NULL! | 5   | 1      | 11 | 6 |
| 5074 | presurvey_arm_1 | #NULL! | #NULL! | 5   | 1      | 11 | 6 |
| 5075 | presurvey_arm_1 | #NULL! | #NULL! | 5   | 1      | 13 | 8 |
| 5076 | presurvey_arm_1 | #NULL! | #NULL! | 5   | 1      | 11 | 6 |
| 5077 | presurvey_arm_1 | #NULL! | #NULL! | 5   | 1      | 12 | 6 |



|      |                 |        |        |     |        |    |   |
|------|-----------------|--------|--------|-----|--------|----|---|
| 5078 | presurvey_arm_1 | #NULL! | #NULL! | 5   | 1      | 12 | 6 |
| 5079 | presurvey_arm_1 | #NULL! | #NULL! | 5   | 1      | 11 | 6 |
| 5080 | presurvey_arm_1 | #NULL! | #NULL! | 5   | 1      | 11 | 6 |
| 5081 | presurvey_arm_1 | #NULL! | #NULL! | 5   | #NULL! | 11 | 6 |
| 5082 | presurvey_arm_1 | #NULL! | #NULL! | 5   | 1      | 11 | 6 |
| 5083 | presurvey_arm_1 | #NULL! | #NULL! | 5   | 1      | 11 | 6 |
| 5084 | presurvey_arm_1 | #NULL! | #NULL! | 5   | 1      | 12 | 6 |
| 5085 | presurvey_arm_1 | #NULL! | #NULL! | 5   | 1      | 11 | 6 |
| 5086 | presurvey_arm_1 | #NULL! | #NULL! | 5   | 1      | 12 | 6 |
| 5087 | presurvey_arm_1 | #NULL! | #NULL! | 5   | #NULL! | 11 | 6 |
| 5088 | presurvey_arm_1 | #NULL! | #NULL! | 5   | 1      | 12 | 6 |
| 5089 | presurvey_arm_1 | #NULL! | #NULL! | 5   | 1      | 11 | 6 |
| 5090 | presurvey_arm_1 | #NULL! | #NULL! | 5   | 1      | 11 | 6 |
| 5091 | presurvey_arm_1 | #NULL! | #NULL! | 5   | 1      | 11 | 6 |
| 5092 | presurvey_arm_1 | #NULL! | #NULL! | 5   | 1      | 13 | 8 |
| 5093 | presurvey_arm_1 | #NULL! | #NULL! | 5   | 1      | 11 | 6 |
| 5094 | presurvey_arm_1 | #NULL! | #NULL! | 999 | 1      | 13 | 8 |
| 5095 | presurvey_arm_1 | #NULL! | #NULL! | 5   | 1      | 12 | 7 |
| 5096 | presurvey_arm_1 | #NULL! | #NULL! | 5   | 1      | 13 | 8 |
| 5097 | presurvey_arm_1 | #NULL! | #NULL! | 5   | 1      | 11 | 6 |
| 5098 | presurvey_arm_1 | #NULL! | #NULL! | 5   | 1      | 11 | 6 |

| gender_pre | sexorient_pre__1 | sexorient_pre__2 | sexorient_pre__3 | sexorient_pre__4 |
|------------|------------------|------------------|------------------|------------------|
| 1          | 1                | 0                | 0                | 0                |
| 0          | 1                | 0                | 0                | 0                |
| 1          | 0                | 0                | 0                | 0                |
| 0          | 0                | 0                | 0                | 1                |
| 0          | 1                | 0                | 0                | 0                |
| 0          | 1                | 0                | 0                | 0                |
| 0          | 1                | 0                | 0                | 0                |
| 0          | 1                | 0                | 0                | 0                |
| 0          | 1                | 0                | 0                | 0                |
| 1          | 1                | 0                | 0                | 0                |
| 0          | 1                | 0                | 0                | 0                |
| 1          | 1                | 0                | 0                | 0                |
| 0          | 1                | 0                | 0                | 0                |
| 1          | 1                | 0                | 0                | 0                |
| 1          | 1                | 0                | 0                | 0                |
| 0          | 1                | 0                | 0                | 0                |
| 0          | 1                | 0                | 0                | 0                |
| 0          | 1                | 0                | 0                | 0                |
| 0          | 1                | 0                | 0                | 0                |
| 1          | 1                | 0                | 0                | 0                |
| 0          | 1                | 0                | 0                | 0                |
| 0          | 1                | 0                | 0                | 0                |
| 1          | 1                | 0                | 0                | 0                |
| 1          | 1                | 0                | 0                | 0                |
| 1          | 1                | 0                | 0                | 0                |
| 0          | 1                | 0                | 0                | 0                |
| 1          | 1                | 0                | 0                | 0                |
| 1          | 1                | 0                | 0                | 0                |
| 1          | 1                | 0                | 0                | 0                |
| 0          | 1                | 0                | 0                | 0                |
| 1          | 1                | 0                | 0                | 0                |
| 1          | 1                | 0                | 0                | 0                |
| 1          | 1                | 0                | 0                | 0                |
| 0          | 1                | 0                | 0                | 0                |
| 0          | 1                | 0                | 0                | 0                |
| 1          | 0                | 0                | 0                | 0                |
| 1          | 1                | 0                | 0                | 0                |
| 1          | 1                | 0                | 0                | 0                |
| 0          | 1                | 0                | 0                | 0                |

|   |   |   |   |   |
|---|---|---|---|---|
| 0 | 1 | 0 | 0 | 0 |
| 1 | 1 | 0 | 0 | 0 |
| 1 | 1 | 0 | 0 | 0 |
| 1 | 0 | 0 | 0 | 1 |
| 0 | 1 | 0 | 0 | 0 |
| 1 | 1 | 0 | 0 | 0 |
| 1 | 1 | 0 | 0 | 0 |
| 1 | 1 | 0 | 0 | 0 |
| 1 | 1 | 0 | 0 | 0 |
| 0 | 1 | 0 | 0 | 0 |
| 0 | 1 | 0 | 0 | 0 |
| 0 | 0 | 0 | 0 | 0 |
| 0 | 0 | 0 | 0 | 0 |
| 1 | 1 | 0 | 0 | 0 |
| 0 | 1 | 0 | 0 | 0 |
| 1 | 1 | 0 | 0 | 0 |
| 1 | 1 | 0 | 0 | 0 |
| 1 | 1 | 0 | 0 | 0 |
| 1 | 0 | 0 | 0 | 1 |
| 0 | 1 | 0 | 0 | 0 |
| 0 | 1 | 0 | 0 | 0 |
| 1 | 1 | 0 | 0 | 0 |
| 1 | 1 | 0 | 0 | 0 |
| 0 | 1 | 0 | 0 | 0 |
| 0 | 1 | 0 | 0 | 0 |
| 1 | 1 | 0 | 0 | 0 |
| 1 | 1 | 0 | 0 | 0 |
| 1 | 1 | 0 | 0 | 0 |
| 1 | 1 | 0 | 0 | 0 |
| 1 | 0 | 0 | 0 | 1 |
| 1 | 1 | 0 | 0 | 0 |
| 1 | 1 | 0 | 0 | 0 |
| 1 | 1 | 0 | 0 | 0 |
| 0 | 1 | 0 | 0 | 0 |
| 0 | 1 | 0 | 0 | 0 |
| 1 | 1 | 0 | 0 | 0 |
| 0 | 1 | 0 | 0 | 0 |
| 0 | 1 | 0 | 0 | 0 |
| 0 | 1 | 0 | 0 | 0 |
| 1 | 1 | 0 | 0 | 0 |
| 0 | 1 | 0 | 0 | 0 |
| 0 | 1 | 0 | 0 | 0 |
| 1 | 1 | 0 | 0 | 0 |
| 0 | 1 | 0 | 0 | 0 |
| 1 | 0 | 0 | 0 | 0 |
| 1 | 1 | 0 | 0 | 0 |

|   |   |   |   |   |
|---|---|---|---|---|
| 0 | 1 | 0 | 0 | 0 |
| 0 | 1 | 0 | 0 | 0 |
| 0 | 1 | 0 | 0 | 0 |
| 1 | 1 | 0 | 0 | 0 |
| 1 | 0 | 0 | 0 | 0 |
| 0 | 0 | 0 | 0 | 0 |
| 1 | 0 | 0 | 0 | 1 |
| 1 | 1 | 0 | 0 | 0 |
| 1 | 1 | 0 | 0 | 0 |
| 1 | 1 | 0 | 0 | 0 |
| 1 | 1 | 0 | 0 | 0 |
| 0 | 1 | 0 | 0 | 0 |
| 0 | 1 | 0 | 0 | 0 |
| 0 | 1 | 0 | 0 | 0 |
| 1 | 1 | 0 | 0 | 0 |
| 1 | 0 | 0 | 0 | 1 |
| 1 | 0 | 0 | 0 | 1 |
| 1 | 1 | 0 | 0 | 0 |
| 0 | 1 | 0 | 0 | 0 |
| 0 | 1 | 0 | 0 | 0 |
| 0 | 1 | 0 | 0 | 0 |
| 1 | 1 | 0 | 0 | 0 |
| 0 | 1 | 0 | 0 | 0 |
| 3 | 0 | 1 | 0 | 0 |
| 1 | 1 | 0 | 0 | 0 |
| 0 | 1 | 0 | 0 | 0 |
| 0 | 1 | 0 | 0 | 0 |
| 0 | 1 | 0 | 0 | 0 |
| 1 | 1 | 0 | 0 | 0 |
| 1 | 1 | 0 | 0 | 0 |
| 0 | 1 | 0 | 0 | 0 |
| 0 | 1 | 0 | 0 | 0 |
| 1 | 1 | 0 | 0 | 0 |
| 1 | 1 | 0 | 0 | 0 |
| 0 | 1 | 0 | 0 | 0 |
| 0 | 1 | 0 | 0 | 0 |
| 1 | 0 | 1 | 0 | 0 |
| 1 | 1 | 0 | 0 | 0 |
| 1 | 1 | 0 | 0 | 0 |
| 1 | 1 | 0 | 0 | 0 |
| 0 | 1 | 0 | 0 | 0 |
| 1 | 1 | 0 | 0 | 0 |
| 0 | 0 | 0 | 0 | 0 |
| 0 | 1 | 0 | 0 | 0 |
| 0 | 1 | 0 | 0 | 0 |
| 1 | 1 | 0 | 0 | 0 |
| 1 | 1 | 0 | 0 | 0 |

|   |   |   |   |   |
|---|---|---|---|---|
| 0 | 1 | 0 | 0 | 0 |
| 0 | 1 | 0 | 0 | 0 |
| 1 | 0 | 0 | 0 | 0 |
| 1 | 1 | 0 | 0 | 0 |
| 1 | 0 | 0 | 0 | 1 |
| 1 | 0 | 0 | 0 | 1 |
| 0 | 0 | 0 | 0 | 0 |
| 0 | 1 | 0 | 0 | 0 |
| 0 | 1 | 0 | 0 | 0 |
| 0 | 1 | 0 | 0 | 0 |
| 1 | 1 | 0 | 0 | 0 |
| 0 | 1 | 0 | 0 | 0 |
| 0 | 0 | 0 | 0 | 0 |
| 0 | 1 | 0 | 0 | 0 |
| 0 | 1 | 0 | 0 | 0 |
| 0 | 1 | 0 | 0 | 0 |
| 0 | 1 | 0 | 0 | 0 |
| 0 | 1 | 0 | 0 | 0 |
| 1 | 1 | 0 | 0 | 0 |
| 1 | 1 | 0 | 0 | 0 |
| 1 | 1 | 0 | 0 | 0 |
| 1 | 1 | 0 | 0 | 0 |
| 1 | 1 | 0 | 0 | 0 |
| 1 | 1 | 0 | 0 | 0 |
| 0 | 0 | 0 | 0 | 0 |
| 0 | 1 | 0 | 0 | 0 |
| 1 | 1 | 0 | 0 | 0 |
| 0 | 1 | 0 | 0 | 0 |
| 1 | 1 | 0 | 0 | 0 |
| 0 | 1 | 0 | 0 | 0 |
| 0 | 1 | 0 | 0 | 0 |
| 0 | 1 | 0 | 0 | 0 |
| 1 | 1 | 0 | 0 | 0 |
| 0 | 1 | 0 | 0 | 0 |
| 1 | 1 | 0 | 0 | 0 |
| 1 | 1 | 0 | 0 | 0 |
| 1 | 1 | 0 | 0 | 0 |
| 1 | 1 | 0 | 0 | 0 |
| 1 | 1 | 0 | 0 | 0 |
| 0 | 1 | 0 | 0 | 0 |
| 1 | 0 | 0 | 0 | 1 |
| 1 | 0 | 0 | 0 | 1 |
| 1 | 1 | 0 | 0 | 0 |
| 1 | 1 | 0 | 0 | 0 |
| 1 | 1 | 0 | 0 | 0 |

|    |   |   |   |   |
|----|---|---|---|---|
| 1  | 1 | 0 | 0 | 0 |
| 1  | 0 | 0 | 0 | 0 |
| 0  | 1 | 0 | 0 | 0 |
| 0  | 1 | 0 | 0 | 0 |
| 1  | 1 | 0 | 0 | 0 |
| 0  | 1 | 0 | 0 | 0 |
| 0  | 1 | 0 | 0 | 0 |
| 1  | 1 | 0 | 0 | 0 |
| 0  | 1 | 0 | 0 | 0 |
| 1  | 1 | 0 | 0 | 0 |
| 0  | 1 | 0 | 0 | 0 |
| 1  | 1 | 0 | 0 | 0 |
| 0  | 1 | 0 | 0 | 0 |
| 1  | 0 | 0 | 0 | 1 |
| 1  | 1 | 0 | 0 | 0 |
| 1  | 1 | 0 | 0 | 0 |
| 1  | 0 | 0 | 0 | 0 |
| 1  | 1 | 0 | 0 | 0 |
| 1  | 1 | 0 | 0 | 0 |
| 1  | 1 | 0 | 0 | 0 |
| 0  | 1 | 0 | 0 | 0 |
| 1  | 1 | 0 | 0 | 0 |
| 0  | 1 | 0 | 0 | 0 |
| 0  | 1 | 0 | 0 | 0 |
| 1  | 0 | 0 | 0 | 1 |
| 1  | 1 | 0 | 0 | 0 |
| 1  | 1 | 0 | 0 | 0 |
| 0  | 1 | 0 | 0 | 0 |
| 0  | 1 | 0 | 0 | 0 |
| 1  | 1 | 0 | 0 | 0 |
| 1  | 1 | 0 | 0 | 0 |
| 0  | 1 | 0 | 0 | 0 |
| 99 | 0 | 0 | 0 | 0 |
| 1  | 1 | 0 | 0 | 0 |
| 1  | 0 | 0 | 0 | 0 |
| 0  | 1 | 0 | 0 | 0 |
| 0  | 1 | 0 | 0 | 0 |
| 0  | 1 | 0 | 0 | 0 |
| 0  | 1 | 0 | 0 | 0 |
| 0  | 1 | 0 | 0 | 0 |
| 0  | 1 | 0 | 0 | 0 |
| 1  | 1 | 0 | 0 | 0 |
| 0  | 1 | 0 | 0 | 0 |
| 1  | 0 | 0 | 0 | 1 |
| 1  | 1 | 0 | 0 | 0 |
| 0  | 1 | 0 | 0 | 0 |
| 1  | 1 | 0 | 0 | 0 |

|   |   |   |   |   |
|---|---|---|---|---|
| 0 | 0 | 0 | 0 | 1 |
| 0 | 1 | 0 | 0 | 0 |
| 1 | 0 | 0 | 0 | 0 |
| 0 | 1 | 0 | 0 | 0 |
| 0 | 1 | 0 | 0 | 0 |
| 1 | 1 | 0 | 0 | 0 |
| 0 | 0 | 0 | 0 | 0 |
| 0 | 0 | 0 | 0 | 0 |
| 1 | 0 | 0 | 0 | 0 |
| 0 | 1 | 0 | 0 | 0 |
| 1 | 0 | 0 | 0 | 0 |
| 0 | 1 | 0 | 0 | 0 |
| 0 | 1 | 0 | 0 | 0 |
| 0 | 1 | 0 | 0 | 0 |
| 1 | 0 | 0 | 0 | 0 |
| 0 | 1 | 0 | 0 | 0 |
| 0 | 1 | 0 | 0 | 0 |
| 0 | 0 | 0 | 1 | 1 |
| 1 | 1 | 0 | 0 | 0 |
| 0 | 1 | 0 | 0 | 0 |
| 0 | 1 | 0 | 0 | 0 |
| 1 | 1 | 0 | 0 | 0 |
| 0 | 0 | 0 | 0 | 0 |
| 1 | 0 | 1 | 0 | 0 |
| 1 | 1 | 0 | 0 | 0 |
| 1 | 1 | 0 | 0 | 0 |
| 0 | 1 | 0 | 0 | 0 |
| 1 | 1 | 0 | 0 | 0 |
| 1 | 1 | 0 | 0 | 0 |
| 0 | 1 | 0 | 0 | 0 |
| 0 | 1 | 0 | 0 | 0 |
| 1 | 0 | 0 | 0 | 0 |
| 0 | 1 | 0 | 0 | 0 |
| 0 | 1 | 0 | 0 | 0 |
| 1 | 1 | 0 | 0 | 0 |
| 1 | 0 | 0 | 0 | 1 |
| 0 | 1 | 0 | 0 | 0 |
| 0 | 1 | 0 | 0 | 0 |
| 1 | 1 | 0 | 0 | 0 |
| 1 | 0 | 0 | 0 | 1 |
| 0 | 1 | 0 | 0 | 0 |
| 1 | 0 | 0 | 0 | 0 |

|   |   |   |   |   |
|---|---|---|---|---|
| 1 | 1 | 0 | 0 | 0 |
| 1 | 1 | 0 | 0 | 0 |
| 1 | 0 | 0 | 0 | 0 |
| 1 | 0 | 0 | 0 | 1 |
| 0 | 1 | 0 | 0 | 0 |
| 0 | 1 | 0 | 0 | 0 |
| 1 | 1 | 0 | 0 | 0 |
| 0 | 1 | 0 | 0 | 0 |
| 1 | 1 | 0 | 0 | 0 |
| 0 | 1 | 0 | 0 | 0 |
| 1 | 1 | 0 | 0 | 0 |
| 0 | 1 | 0 | 0 | 0 |
| 0 | 1 | 0 | 0 | 0 |
| 0 | 1 | 0 | 0 | 0 |
| 1 | 1 | 0 | 0 | 0 |
| 1 | 1 | 0 | 0 | 0 |
| 1 | 1 | 0 | 0 | 0 |
| 1 | 1 | 0 | 0 | 0 |
| 1 | 0 | 0 | 0 | 0 |
| 1 | 0 | 0 | 0 | 1 |
| 0 | 1 | 0 | 0 | 0 |
| 1 | 1 | 0 | 0 | 0 |
| 0 | 1 | 0 | 0 | 0 |
| 0 | 1 | 0 | 0 | 0 |
| 0 | 1 | 0 | 0 | 0 |
| 1 | 0 | 0 | 0 | 1 |
| 0 | 1 | 0 | 0 | 0 |
| 0 | 1 | 0 | 0 | 0 |
| 0 | 1 | 0 | 0 | 0 |
| 1 | 0 | 0 | 0 | 1 |
| 0 | 1 | 0 | 0 | 0 |
| 1 | 0 | 0 | 0 | 1 |
| 0 | 1 | 0 | 0 | 0 |
| 0 | 0 | 0 | 0 | 0 |
| 0 | 1 | 0 | 0 | 0 |
| 0 | 1 | 0 | 0 | 0 |
| 1 | 1 | 0 | 0 | 0 |
| 0 | 1 | 0 | 0 | 0 |
| 1 | 1 | 0 | 0 | 0 |
| 1 | 1 | 0 | 0 | 0 |
| 1 | 1 | 0 | 0 | 0 |
| 0 | 1 | 0 | 0 | 0 |
| 1 | 1 | 0 | 0 | 0 |
| 1 | 1 | 0 | 0 | 0 |
| 1 | 1 | 0 | 0 | 0 |
| 0 | 0 | 0 | 0 | 1 |
| 0 | 1 | 0 | 0 | 0 |



|   |   |   |   |   |
|---|---|---|---|---|
| 1 | 1 | 0 | 0 | 0 |
| 1 | 1 | 0 | 0 | 0 |
| 1 | 1 | 0 | 0 | 0 |
| 0 | 1 | 0 | 0 | 0 |
| 0 | 1 | 0 | 0 | 0 |
| 1 | 1 | 0 | 0 | 0 |
| 0 | 1 | 0 | 0 | 0 |
| 0 | 1 | 0 | 0 | 0 |
| 1 | 1 | 0 | 0 | 0 |
| 1 | 1 | 0 | 0 | 0 |
| 1 | 1 | 0 | 0 | 0 |
| 0 | 0 | 0 | 0 | 1 |
| 1 | 1 | 0 | 0 | 0 |
| 1 | 0 | 0 | 0 | 0 |
| 1 | 1 | 0 | 0 | 0 |
| 1 | 1 | 0 | 0 | 0 |
| 0 | 1 | 0 | 0 | 0 |
| 1 | 1 | 0 | 0 | 0 |
| 1 | 1 | 0 | 0 | 0 |
| 1 | 1 | 0 | 0 | 0 |
| 3 | 0 | 0 | 1 | 0 |
| 1 | 0 | 0 | 0 | 1 |
| 0 | 1 | 0 | 0 | 0 |
| 0 | 1 | 0 | 0 | 0 |
| 0 | 1 | 0 | 0 | 0 |
| 0 | 1 | 0 | 0 | 0 |
| 1 | 1 | 0 | 0 | 0 |
| 0 | 1 | 0 | 0 | 0 |
| 1 | 0 | 0 | 0 | 1 |
| 1 | 1 | 0 | 0 | 0 |
| 0 | 1 | 0 | 0 | 0 |
| 1 | 0 | 0 | 0 | 1 |
| 0 | 1 | 0 | 0 | 0 |
| 1 | 0 | 0 | 0 | 0 |
| 0 | 1 | 0 | 0 | 0 |
| 0 | 1 | 0 | 0 | 0 |
| 0 | 0 | 0 | 0 | 1 |
| 0 | 1 | 0 | 0 | 0 |
| 1 | 1 | 0 | 0 | 0 |
| 0 | 1 | 0 | 0 | 0 |
| 1 | 0 | 0 | 0 | 1 |
| 0 | 0 | 0 | 1 | 0 |
| 0 | 1 | 0 | 0 | 0 |
| 0 | 1 | 0 | 0 | 0 |

|   |   |   |   |   |
|---|---|---|---|---|
| 1 | 1 | 0 | 0 | 0 |
| 1 | 1 | 0 | 0 | 0 |
| 0 | 1 | 0 | 0 | 0 |
| 1 | 0 | 0 | 0 | 1 |
| 0 | 0 | 0 | 0 | 0 |
| 0 | 1 | 0 | 0 | 0 |
| 0 | 1 | 0 | 0 | 0 |
| 1 | 1 | 0 | 0 | 0 |
| 1 | 1 | 0 | 0 | 0 |
| 0 | 0 | 0 | 1 | 0 |
| 0 | 1 | 0 | 0 | 0 |
| 1 | 0 | 0 | 0 | 1 |
| 0 | 1 | 0 | 0 | 0 |
| 0 | 1 | 0 | 0 | 0 |
| 1 | 1 | 0 | 0 | 0 |
| 1 | 1 | 0 | 0 | 0 |
| 1 | 1 | 0 | 0 | 0 |
| 1 | 0 | 0 | 0 | 0 |
| 0 | 1 | 0 | 0 | 0 |
| 0 | 0 | 0 | 0 | 0 |
| 0 | 1 | 0 | 0 | 0 |
| 0 | 1 | 0 | 0 | 0 |
| 0 | 1 | 0 | 0 | 0 |
| 0 | 0 | 0 | 0 | 0 |
| 0 | 0 | 0 | 0 | 0 |
| 0 | 1 | 0 | 0 | 0 |
| 1 | 1 | 0 | 0 | 0 |
| 1 | 0 | 0 | 0 | 0 |
| 1 | 0 | 0 | 0 | 0 |
| 0 | 1 | 0 | 0 | 0 |
| 1 | 0 | 0 | 0 | 0 |
| 1 | 1 | 0 | 0 | 0 |
| 0 | 1 | 0 | 0 | 0 |
| 0 | 1 | 0 | 0 | 0 |
| 1 | 0 | 0 | 0 | 0 |
| 0 | 1 | 0 | 0 | 0 |
| 1 | 0 | 0 | 0 | 1 |
| 0 | 1 | 0 | 0 | 0 |
| 0 | 1 | 0 | 0 | 0 |
| 1 | 1 | 0 | 0 | 0 |
| 1 | 1 | 0 | 0 | 0 |
| 0 | 1 | 0 | 0 | 0 |
| 0 | 1 | 0 | 0 | 0 |
| 1 | 0 | 1 | 0 | 0 |
| 1 | 1 | 0 | 0 | 0 |
| 1 | 1 | 0 | 0 | 0 |
| 0 | 1 | 0 | 0 | 0 |

|   |   |   |   |   |
|---|---|---|---|---|
| 0 | 1 | 0 | 0 | 0 |
| 1 | 1 | 0 | 0 | 0 |
| 0 | 1 | 0 | 0 | 0 |
| 0 | 0 | 0 | 0 | 0 |
| 1 | 1 | 0 | 0 | 0 |
| 0 | 1 | 0 | 0 | 0 |
| 0 | 1 | 0 | 0 | 0 |
| 1 | 1 | 0 | 0 | 0 |
| 0 | 1 | 0 | 0 | 0 |
| 1 | 1 | 0 | 0 | 0 |
| 1 | 1 | 0 | 0 | 0 |
| 1 | 1 | 0 | 0 | 0 |
| 0 | 1 | 0 | 0 | 0 |
| 1 | 1 | 0 | 0 | 0 |
| 1 | 1 | 0 | 0 | 0 |
| 0 | 1 | 0 | 0 | 0 |
| 1 | 1 | 0 | 0 | 0 |
| 1 | 1 | 0 | 0 | 0 |
| 0 | 1 | 0 | 0 | 0 |
| 0 | 0 | 0 | 0 | 0 |
| 0 | 1 | 0 | 0 | 0 |
| 0 | 1 | 0 | 0 | 0 |
| 1 | 1 | 0 | 0 | 0 |
| 1 | 1 | 0 | 0 | 0 |
| 0 | 1 | 0 | 0 | 0 |
| 1 | 1 | 0 | 0 | 0 |
| 1 | 1 | 0 | 0 | 0 |
| 1 | 1 | 0 | 0 | 0 |
| 0 | 1 | 0 | 0 | 0 |
| 1 | 1 | 0 | 0 | 0 |
| 1 | 1 | 0 | 0 | 0 |
| 1 | 1 | 0 | 0 | 0 |
| 0 | 1 | 0 | 0 | 0 |
| 1 | 0 | 1 | 0 | 0 |
| 0 | 1 | 0 | 0 | 0 |
| 0 | 1 | 0 | 0 | 0 |
| 0 | 1 | 0 | 0 | 0 |
| 0 | 1 | 0 | 0 | 0 |
| 0 | 1 | 0 | 0 | 0 |
| 1 | 0 | 0 | 0 | 0 |
| 0 | 1 | 0 | 0 | 0 |
| 0 | 1 | 0 | 0 | 0 |
| 0 | 1 | 0 | 0 | 0 |
| 1 | 0 | 0 | 0 | 0 |
| 0 | 1 | 0 | 0 | 0 |
| 0 | 1 | 0 | 0 | 0 |

|   |   |   |   |   |
|---|---|---|---|---|
| 1 | 0 | 0 | 0 | 0 |
| 1 | 0 | 0 | 0 | 0 |
| 0 | 1 | 0 | 0 | 0 |
| 0 | 0 | 0 | 0 | 0 |
| 1 | 1 | 0 | 0 | 0 |
| 1 | 0 | 0 | 0 | 1 |
| 1 | 1 | 0 | 0 | 0 |
| 0 | 1 | 0 | 0 | 0 |
| 1 | 1 | 0 | 0 | 0 |
| 0 | 1 | 0 | 0 | 0 |
| 0 | 0 | 0 | 0 | 0 |
| 0 | 1 | 0 | 0 | 0 |
| 1 | 1 | 0 | 0 | 0 |
| 0 | 1 | 0 | 0 | 0 |
| 0 | 1 | 0 | 0 | 0 |
| 0 | 1 | 0 | 0 | 0 |
| 1 | 1 | 0 | 0 | 0 |
| 1 | 1 | 0 | 0 | 0 |
| 1 | 1 | 0 | 0 | 0 |
| 1 | 1 | 0 | 0 | 0 |
| 1 | 1 | 0 | 0 | 0 |
| 0 | 1 | 0 | 0 | 0 |
| 0 | 1 | 0 | 0 | 0 |
| 1 | 1 | 0 | 0 | 0 |
| 1 | 0 | 0 | 0 | 0 |
| 1 | 1 | 0 | 0 | 0 |
| 1 | 1 | 0 | 0 | 0 |
| 1 | 1 | 0 | 0 | 0 |
| 1 | 1 | 0 | 0 | 0 |
| 0 | 1 | 0 | 0 | 0 |
| 0 | 0 | 0 | 0 | 1 |
| 1 | 1 | 0 | 0 | 0 |
| 1 | 1 | 0 | 0 | 0 |
| 1 | 0 | 0 | 0 | 0 |
| 1 | 0 | 0 | 0 | 0 |
| 0 | 1 | 0 | 0 | 0 |
| 0 | 1 | 1 | 0 | 0 |
| 0 | 1 | 0 | 0 | 0 |
| 0 | 1 | 0 | 0 | 0 |
| 0 | 1 | 0 | 0 | 0 |
| 0 | 1 | 0 | 0 | 0 |
| 0 | 1 | 0 | 0 | 0 |
| 0 | 1 | 0 | 0 | 0 |
| 0 | 1 | 0 | 0 | 0 |
| 0 | 1 | 0 | 0 | 0 |
| 1 | 0 | 0 | 0 | 1 |
| 0 | 1 | 0 | 0 | 0 |
| 1 | 1 | 0 | 0 | 0 |
| 0 | 1 | 0 | 0 | 0 |

|   |   |   |   |   |
|---|---|---|---|---|
| 1 | 1 | 0 | 0 | 0 |
| 1 | 1 | 0 | 0 | 0 |
| 1 | 1 | 0 | 0 | 0 |
| 1 | 1 | 0 | 0 | 0 |
| 0 | 1 | 0 | 0 | 0 |
| 0 | 0 | 0 | 0 | 0 |
| 0 | 1 | 0 | 0 | 0 |
| 0 | 1 | 0 | 0 | 0 |
| 0 | 1 | 0 | 0 | 0 |
| 0 | 0 | 0 | 0 | 0 |
| 1 | 1 | 0 | 0 | 0 |
| 0 | 1 | 0 | 0 | 0 |
| 1 | 1 | 0 | 0 | 0 |
| 1 | 1 | 0 | 0 | 0 |
| 1 | 1 | 0 | 0 | 0 |
| 0 | 1 | 0 | 0 | 0 |
| 0 | 1 | 0 | 0 | 0 |
| 0 | 1 | 0 | 0 | 0 |
| 0 | 1 | 0 | 0 | 0 |
| 1 | 1 | 0 | 0 | 0 |
| 0 | 1 | 0 | 0 | 0 |
| 1 | 0 | 0 | 0 | 1 |
| 0 | 1 | 0 | 0 | 0 |
| 3 | 0 | 0 | 0 | 0 |
| 1 | 0 | 0 | 0 | 1 |
| 1 | 1 | 0 | 0 | 0 |
| 1 | 0 | 0 | 0 | 1 |
| 0 | 0 | 0 | 0 | 1 |
| 0 | 1 | 0 | 0 | 0 |
| 1 | 0 | 1 | 0 | 0 |
| 0 | 1 | 0 | 0 | 0 |
| 1 | 1 | 0 | 0 | 0 |
| 1 | 0 | 0 | 0 | 1 |
| 1 | 1 | 0 | 0 | 0 |
| 0 | 1 | 0 | 0 | 0 |
| 1 | 1 | 0 | 0 | 0 |
| 1 | 0 | 0 | 0 | 0 |
| 0 | 1 | 0 | 0 | 0 |
| 1 | 1 | 0 | 0 | 0 |
| 0 | 1 | 0 | 0 | 0 |
| 1 | 1 | 0 | 0 | 0 |
| 0 | 1 | 0 | 0 | 0 |
| 1 | 1 | 0 | 0 | 0 |
| 0 | 1 | 0 | 0 | 0 |
| 0 | 0 | 0 | 0 | 0 |
| 0 | 1 | 0 | 0 | 0 |
| 0 | 1 | 0 | 0 | 0 |

|    |   |   |   |   |
|----|---|---|---|---|
| 0  | 1 | 0 | 0 | 0 |
| 1  | 1 | 0 | 0 | 0 |
| 1  | 1 | 0 | 0 | 0 |
| 0  | 1 | 0 | 0 | 0 |
| 0  | 1 | 0 | 0 | 0 |
| 1  | 1 | 0 | 0 | 0 |
| 0  | 1 | 0 | 0 | 0 |
| 0  | 1 | 0 | 0 | 0 |
| 1  | 1 | 0 | 0 | 0 |
| 0  | 1 | 0 | 0 | 0 |
| 0  | 1 | 0 | 0 | 0 |
| 0  | 1 | 0 | 0 | 0 |
| 1  | 0 | 0 | 0 | 0 |
| 0  | 1 | 0 | 0 | 0 |
| 0  | 1 | 0 | 0 | 0 |
| 1  | 1 | 0 | 0 | 0 |
| 1  | 1 | 0 | 0 | 0 |
| 0  | 1 | 0 | 0 | 0 |
| 0  | 1 | 0 | 0 | 0 |
| 1  | 1 | 0 | 0 | 0 |
| 0  | 1 | 0 | 0 | 0 |
| 1  | 1 | 0 | 0 | 0 |
| 0  | 1 | 0 | 0 | 0 |
| 1  | 1 | 0 | 0 | 0 |
| 0  | 1 | 0 | 0 | 0 |
| 1  | 1 | 0 | 0 | 0 |
| 0  | 1 | 0 | 0 | 0 |
| 0  | 1 | 0 | 0 | 0 |
| 0  | 1 | 0 | 0 | 0 |
| 0  | 1 | 0 | 0 | 0 |
| 1  | 1 | 0 | 0 | 0 |
| 0  | 0 | 0 | 0 | 0 |
| 99 | 0 | 0 | 0 | 0 |
| 1  | 1 | 0 | 0 | 0 |
| 1  | 1 | 0 | 0 | 0 |
| 1  | 1 | 0 | 0 | 0 |
| 0  | 1 | 0 | 0 | 0 |
| 0  | 1 | 0 | 0 | 0 |
| 0  | 0 | 0 | 0 | 0 |
| 0  | 0 | 0 | 0 | 0 |
| 0  | 1 | 0 | 0 | 0 |
| 1  | 1 | 0 | 0 | 0 |
| 0  | 0 | 0 | 0 | 0 |
| 1  | 1 | 0 | 0 | 0 |
| 0  | 1 | 0 | 0 | 0 |
| 0  | 1 | 0 | 0 | 0 |
| 0  | 1 | 0 | 0 | 0 |
| 1  | 1 | 0 | 0 | 0 |
| 0  | 0 | 0 | 0 | 0 |
| 1  | 1 | 0 | 0 | 0 |

|   |   |   |   |   |
|---|---|---|---|---|
| 1 | 0 | 0 | 0 | 0 |
| 0 | 1 | 0 | 0 | 0 |
| 1 | 1 | 0 | 0 | 0 |
| 0 | 0 | 0 | 0 | 0 |
| 1 | 1 | 0 | 0 | 0 |
| 0 | 0 | 0 | 0 | 0 |
| 0 | 1 | 0 | 0 | 0 |
| 1 | 1 | 0 | 0 | 0 |
| 1 | 1 | 0 | 0 | 0 |
| 1 | 1 | 0 | 0 | 0 |
| 0 | 1 | 0 | 0 | 0 |
| 1 | 1 | 0 | 0 | 0 |
| 0 | 1 | 0 | 0 | 0 |
| 0 | 1 | 0 | 0 | 0 |
| 0 | 1 | 0 | 0 | 0 |
| 1 | 1 | 0 | 0 | 0 |
| 0 | 1 | 0 | 0 | 0 |
| 1 | 0 | 0 | 0 | 1 |
| 0 | 1 | 0 | 0 | 0 |
| 0 | 1 | 0 | 0 | 0 |
| 1 | 1 | 0 | 0 | 0 |
| 1 | 1 | 0 | 0 | 0 |
| 0 | 1 | 0 | 0 | 0 |
| 1 | 1 | 0 | 0 | 0 |
| 0 | 1 | 0 | 0 | 0 |
| 1 | 1 | 0 | 0 | 0 |
| 0 | 1 | 0 | 0 | 0 |
| 1 | 0 | 0 | 0 | 0 |
| 1 | 1 | 0 | 0 | 0 |
| 0 | 1 | 0 | 0 | 0 |
| 0 | 1 | 0 | 0 | 0 |
| 1 | 1 | 0 | 0 | 0 |
| 1 | 1 | 0 | 0 | 0 |
| 0 | 0 | 0 | 0 | 0 |
| 1 | 0 | 0 | 0 | 1 |
| 1 | 1 | 0 | 0 | 0 |
| 0 | 1 | 0 | 0 | 0 |
| 0 | 1 | 0 | 0 | 0 |
| 0 | 1 | 0 | 0 | 0 |
| 1 | 1 | 0 | 0 | 0 |
| 0 | 1 | 0 | 0 | 0 |
| 1 | 1 | 0 | 0 | 0 |
| 0 | 1 | 0 | 0 | 0 |
| 1 | 1 | 0 | 0 | 0 |

|    |   |   |   |   |
|----|---|---|---|---|
| 0  | 1 | 0 | 0 | 0 |
| 0  | 1 | 0 | 0 | 0 |
| 0  | 1 | 0 | 0 | 0 |
| 1  | 1 | 0 | 0 | 0 |
| 0  | 1 | 0 | 0 | 0 |
| 1  | 1 | 0 | 0 | 0 |
| 0  | 0 | 0 | 0 | 0 |
| 0  | 1 | 0 | 0 | 0 |
| 0  | 1 | 0 | 0 | 0 |
| 1  | 1 | 0 | 0 | 0 |
| 0  | 1 | 0 | 0 | 0 |
| 1  | 1 | 0 | 0 | 0 |
| 1  | 1 | 0 | 0 | 0 |
| 0  | 1 | 0 | 0 | 0 |
| 1  | 1 | 0 | 0 | 0 |
| 1  | 1 | 0 | 0 | 0 |
| 1  | 1 | 0 | 0 | 0 |
| 1  | 1 | 0 | 0 | 0 |
| 1  | 1 | 0 | 0 | 0 |
| 1  | 0 | 0 | 0 | 0 |
| 1  | 1 | 0 | 0 | 1 |
| 1  | 1 | 0 | 0 | 0 |
| 1  | 1 | 0 | 0 | 0 |
| 1  | 1 | 0 | 0 | 0 |
| 99 | 1 | 0 | 0 | 0 |
| 0  | 1 | 0 | 0 | 0 |
| 1  | 1 | 0 | 0 | 0 |
| 0  | 1 | 0 | 0 | 0 |
| 1  | 1 | 0 | 0 | 0 |
| 0  | 0 | 0 | 0 | 0 |
| 1  | 0 | 0 | 0 | 1 |
| 0  | 0 | 0 | 0 | 0 |
| 0  | 1 | 0 | 0 | 0 |
| 0  | 1 | 0 | 0 | 0 |
| 0  | 0 | 0 | 0 | 0 |
| 0  | 0 | 0 | 0 | 1 |
| 1  | 0 | 0 | 0 | 0 |
| 0  | 1 | 0 | 0 | 0 |
| 0  | 1 | 0 | 0 | 0 |
| 0  | 1 | 0 | 0 | 0 |
| 1  | 1 | 0 | 0 | 0 |
| 1  | 0 | 0 | 0 | 0 |
| 0  | 1 | 0 | 0 | 0 |
| 0  | 1 | 0 | 0 | 0 |
| 1  | 1 | 0 | 0 | 0 |
| 1  | 0 | 0 | 0 | 1 |
| 0  | 0 | 0 | 0 | 0 |
| 1  | 1 | 0 | 0 | 0 |



|    |   |   |   |   |
|----|---|---|---|---|
| 0  | 0 | 0 | 0 | 0 |
| 1  | 0 | 0 | 0 | 0 |
| 1  | 1 | 0 | 0 | 0 |
| 0  | 0 | 0 | 0 | 0 |
| 0  | 0 | 0 | 0 | 0 |
| 0  | 1 | 0 | 0 | 0 |
| 1  | 1 | 0 | 0 | 0 |
| 0  | 1 | 0 | 0 | 0 |
| 0  | 1 | 0 | 0 | 0 |
| 0  | 0 | 0 | 0 | 0 |
| 1  | 1 | 0 | 0 | 0 |
| 0  | 1 | 0 | 0 | 1 |
| 1  | 0 | 0 | 0 | 0 |
| 1  | 0 | 0 | 0 | 1 |
| 1  | 1 | 0 | 0 | 0 |
| 0  | 1 | 0 | 0 | 0 |
| 0  | 1 | 0 | 0 | 0 |
| 1  | 0 | 0 | 0 | 0 |
| 1  | 0 | 0 | 0 | 0 |
| 99 | 0 | 0 | 0 | 0 |
| 1  | 1 | 0 | 0 | 0 |
| 0  | 1 | 0 | 0 | 0 |
| 0  | 1 | 0 | 0 | 0 |
| 1  | 1 | 0 | 0 | 0 |
| 1  | 1 | 0 | 0 | 0 |
| 1  | 0 | 0 | 0 | 1 |
| 1  | 1 | 0 | 0 | 0 |
| 0  | 1 | 0 | 0 | 0 |
| 1  | 1 | 0 | 0 | 0 |
| 1  | 1 | 0 | 0 | 0 |
| 1  | 0 | 0 | 1 | 0 |
| 1  | 1 | 0 | 0 | 0 |
| 1  | 1 | 0 | 0 | 0 |
| 1  | 1 | 0 | 0 | 0 |
| 1  | 0 | 0 | 0 | 0 |
| 0  | 1 | 0 | 0 | 0 |
| 1  | 1 | 0 | 0 | 0 |
| 0  | 1 | 0 | 0 | 0 |
| 1  | 0 | 0 | 0 | 0 |
| 0  | 0 | 0 | 0 | 0 |
| 0  | 0 | 0 | 0 | 0 |
| 1  | 1 | 0 | 0 | 0 |
| 1  | 1 | 0 | 0 | 0 |
| 0  | 1 | 0 | 0 | 0 |
| 1  | 0 | 0 | 0 | 0 |
| 1  | 1 | 0 | 0 | 0 |
| 1  | 1 | 0 | 0 | 0 |
| 0  | 1 | 0 | 0 | 0 |
| 1  | 1 | 0 | 0 | 0 |
| 0  | 1 | 0 | 0 | 0 |
| 1  | 1 | 0 | 0 | 0 |

|   |   |   |   |   |
|---|---|---|---|---|
| 0 | 1 | 0 | 0 | 0 |
| 0 | 1 | 0 | 0 | 0 |
| 1 | 0 | 0 | 0 | 0 |
| 1 | 1 | 0 | 0 | 0 |
| 1 | 0 | 0 | 0 | 1 |
| 1 | 1 | 0 | 0 | 0 |
| 1 | 1 | 0 | 0 | 0 |
| 0 | 1 | 0 | 0 | 0 |
| 0 | 0 | 0 | 0 | 0 |
| 1 | 1 | 0 | 0 | 0 |
| 0 | 1 | 0 | 0 | 0 |
| 0 | 1 | 0 | 0 | 0 |
| 1 | 1 | 0 | 0 | 0 |
| 0 | 1 | 0 | 0 | 0 |
| 1 | 1 | 0 | 0 | 0 |
| 1 | 0 | 0 | 0 | 1 |
| 1 | 1 | 0 | 0 | 0 |
| 0 | 1 | 0 | 0 | 0 |
| 1 | 1 | 0 | 0 | 0 |
| 1 | 1 | 0 | 0 | 0 |
| 1 | 1 | 0 | 0 | 0 |
| 1 | 1 | 0 | 0 | 0 |
| 1 | 0 | 0 | 0 | 1 |
| 0 | 1 | 0 | 0 | 0 |
| 0 | 0 | 0 | 0 | 0 |
| 0 | 1 | 0 | 0 | 0 |
| 0 | 1 | 0 | 0 | 0 |
| 1 | 0 | 0 | 0 | 1 |
| 0 | 1 | 0 | 0 | 0 |
| 0 | 1 | 0 | 0 | 0 |
| 1 | 0 | 0 | 0 | 1 |
| 0 | 1 | 0 | 0 | 0 |
| 1 | 0 | 0 | 0 | 0 |
| 0 | 0 | 0 | 0 | 0 |
| 1 | 1 | 0 | 0 | 0 |
| 0 | 1 | 0 | 0 | 0 |
| 1 | 0 | 0 | 0 | 0 |
| 0 | 1 | 0 | 0 | 0 |
| 0 | 0 | 0 | 0 | 0 |
| 1 | 1 | 0 | 0 | 0 |
| 0 | 1 | 0 | 0 | 0 |
| 1 | 0 | 0 | 0 | 0 |
| 0 | 1 | 0 | 0 | 0 |
| 0 | 0 | 0 | 0 | 0 |

|   |   |   |   |   |
|---|---|---|---|---|
| 1 | 1 | 0 | 0 | 0 |
| 0 | 1 | 0 | 0 | 0 |
| 0 | 1 | 0 | 0 | 0 |
| 0 | 1 | 0 | 0 | 0 |
| 0 | 1 | 0 | 0 | 0 |
| 0 | 1 | 0 | 0 | 0 |
| 1 | 1 | 0 | 0 | 0 |
| 0 | 1 | 0 | 0 | 0 |
| 1 | 1 | 0 | 0 | 0 |
| 0 | 1 | 0 | 0 | 0 |
| 1 | 1 | 0 | 0 | 0 |
| 0 | 1 | 0 | 0 | 0 |
| 1 | 1 | 0 | 0 | 0 |
| 1 | 0 | 0 | 0 | 0 |
| 1 | 0 | 0 | 0 | 0 |
| 1 | 1 | 0 | 0 | 0 |
| 0 | 1 | 0 | 0 | 0 |
| 1 | 1 | 0 | 0 | 0 |
| 0 | 1 | 0 | 0 | 0 |
| 0 | 1 | 0 | 0 | 0 |
| 1 | 1 | 0 | 0 | 0 |
| 1 | 1 | 0 | 0 | 0 |
| 3 | 0 | 0 | 0 | 0 |
| 0 | 1 | 0 | 0 | 0 |
| 1 | 1 | 0 | 0 | 0 |
| 1 | 0 | 0 | 0 | 1 |
| 0 | 1 | 0 | 0 | 0 |
| 0 | 0 | 0 | 0 | 0 |
| 1 | 0 | 0 | 0 | 1 |
| 0 | 1 | 0 | 0 | 0 |
| 1 | 1 | 0 | 0 | 0 |
| 1 | 0 | 0 | 0 | 1 |
| 0 | 0 | 0 | 0 | 0 |
| 1 | 0 | 0 | 0 | 0 |
| 1 | 1 | 0 | 0 | 0 |
| 0 | 1 | 0 | 0 | 0 |
| 0 | 1 | 0 | 0 | 0 |
| 0 | 1 | 0 | 0 | 0 |
| 3 | 1 | 0 | 0 | 0 |
| 1 | 0 | 0 | 0 | 1 |
| 0 | 1 | 0 | 0 | 0 |
| 0 | 1 | 0 | 0 | 0 |
| 1 | 1 | 0 | 0 | 0 |
| 0 | 1 | 0 | 0 | 0 |
| 1 | 1 | 0 | 0 | 0 |
| 0 | 1 | 0 | 0 | 0 |
| 0 | 1 | 0 | 0 | 0 |
| 0 | 1 | 0 | 0 | 0 |

|   |   |   |   |   |
|---|---|---|---|---|
| 1 | 1 | 0 | 0 | 0 |
| 0 | 1 | 0 | 0 | 0 |
| 1 | 0 | 0 | 0 | 0 |
| 1 | 1 | 0 | 0 | 0 |
| 0 | 1 | 0 | 0 | 0 |
| 1 | 1 | 0 | 0 | 0 |
| 1 | 1 | 0 | 0 | 0 |
| 0 | 1 | 0 | 0 | 0 |
| 0 | 1 | 0 | 0 | 0 |
| 0 | 1 | 0 | 0 | 0 |
| 1 | 1 | 0 | 0 | 0 |
| 0 | 1 | 0 | 0 | 0 |
| 0 | 0 | 0 | 0 | 1 |
| 1 | 1 | 0 | 0 | 0 |
| 1 | 1 | 0 | 0 | 0 |
| 1 | 1 | 0 | 0 | 0 |
| 1 | 1 | 0 | 0 | 0 |
| 0 | 0 | 0 | 0 | 0 |
| 1 | 1 | 0 | 0 | 0 |
| 1 | 1 | 0 | 0 | 0 |
| 0 | 0 | 0 | 0 | 0 |
| 0 | 0 | 0 | 0 | 1 |
| 0 | 0 | 0 | 0 | 0 |
| 1 | 1 | 0 | 0 | 0 |
| 0 | 1 | 0 | 0 | 0 |
| 1 | 1 | 0 | 0 | 0 |
| 0 | 0 | 0 | 0 | 0 |
| 0 | 1 | 0 | 0 | 0 |
| 1 | 0 | 0 | 0 | 0 |
| 0 | 1 | 0 | 0 | 0 |
| 1 | 1 | 0 | 0 | 0 |
| 0 | 1 | 0 | 0 | 0 |
| 0 | 1 | 0 | 0 | 0 |
| 0 | 1 | 0 | 0 | 0 |
| 2 | 0 | 0 | 0 | 0 |
| 1 | 1 | 0 | 0 | 0 |
| 0 | 1 | 0 | 0 | 0 |
| 0 | 1 | 0 | 0 | 0 |
| 1 | 1 | 0 | 0 | 0 |
| 3 | 1 | 0 | 0 | 0 |
| 1 | 1 | 0 | 0 | 0 |
| 1 | 1 | 0 | 0 | 0 |

|   |   |   |   |   |
|---|---|---|---|---|
| 1 | 1 | 0 | 0 | 0 |
| 1 | 0 | 0 | 0 | 0 |
| 0 | 1 | 0 | 0 | 0 |
| 0 | 1 | 0 | 0 | 0 |
| 0 | 0 | 0 | 1 | 0 |
| 1 | 1 | 0 | 0 | 0 |
| 0 | 0 | 0 | 0 | 1 |
| 0 | 0 | 0 | 0 | 0 |
| 0 | 0 | 0 | 0 | 0 |
| 0 | 1 | 0 | 0 | 0 |
| 0 | 0 | 0 | 0 | 0 |
| 0 | 1 | 0 | 0 | 0 |
| 0 | 1 | 0 | 0 | 0 |
| 0 | 0 | 0 | 0 | 0 |
| 1 | 0 | 0 | 0 | 0 |
| 1 | 0 | 0 | 0 | 1 |
| 0 | 1 | 0 | 0 | 0 |
| 1 | 1 | 0 | 0 | 0 |
| 0 | 1 | 0 | 0 | 0 |
| 0 | 1 | 0 | 0 | 0 |
| 1 | 1 | 0 | 0 | 0 |
| 0 | 1 | 0 | 0 | 0 |
| 0 | 1 | 0 | 0 | 0 |
| 1 | 1 | 0 | 0 | 0 |
| 0 | 1 | 0 | 0 | 0 |
| 0 | 1 | 0 | 0 | 0 |
| 0 | 0 | 0 | 0 | 0 |
| 0 | 1 | 0 | 0 | 0 |
| 0 | 1 | 0 | 0 | 0 |
| 1 | 0 | 0 | 0 | 0 |
| 0 | 1 | 0 | 0 | 0 |
| 0 | 1 | 0 | 0 | 0 |
| 1 | 1 | 0 | 0 | 0 |
| 0 | 1 | 0 | 0 | 0 |
| 3 | 1 | 0 | 0 | 0 |
| 1 | 0 | 0 | 0 | 1 |
| 0 | 0 | 0 | 0 | 0 |
| 0 | 1 | 0 | 0 | 0 |
| 1 | 1 | 0 | 0 | 0 |
| 0 | 1 | 0 | 0 | 0 |
| 0 | 1 | 0 | 0 | 0 |
| 1 | 1 | 0 | 0 | 0 |
| 0 | 1 | 0 | 0 | 0 |
| 1 | 1 | 0 | 0 | 0 |
| 0 | 1 | 0 | 0 | 0 |

|   |   |   |   |   |
|---|---|---|---|---|
| 1 | 1 | 0 | 0 | 0 |
| 0 | 1 | 0 | 0 | 0 |
| 0 | 1 | 0 | 0 | 0 |
| 1 | 1 | 0 | 0 | 0 |
| 0 | 1 | 0 | 0 | 0 |
| 1 | 1 | 0 | 0 | 0 |
| 1 | 1 | 0 | 0 | 0 |
| 1 | 0 | 0 | 0 | 1 |
| 1 | 0 | 0 | 0 | 0 |
| 1 | 1 | 0 | 0 | 0 |
| 1 | 1 | 0 | 0 | 0 |
| 1 | 0 | 0 | 0 | 1 |
| 0 | 1 | 0 | 0 | 0 |
| 1 | 0 | 0 | 0 | 1 |
| 1 | 0 | 0 | 0 | 0 |
| 0 | 0 | 0 | 0 | 0 |
| 1 | 1 | 0 | 0 | 0 |
| 0 | 0 | 0 | 0 | 0 |
| 1 | 1 | 0 | 0 | 0 |
| 1 | 1 | 0 | 0 | 0 |
| 0 | 1 | 0 | 0 | 0 |
| 0 | 1 | 0 | 0 | 0 |
| 1 | 1 | 0 | 0 | 0 |
| 1 | 1 | 0 | 0 | 0 |
| 0 | 1 | 0 | 0 | 0 |
| 1 | 1 | 0 | 0 | 0 |
| 0 | 0 | 0 | 0 | 0 |
| 1 | 1 | 0 | 0 | 0 |
| 0 | 1 | 0 | 0 | 0 |
| 0 | 1 | 0 | 0 | 0 |
| 1 | 1 | 0 | 0 | 0 |
| 0 | 1 | 0 | 0 | 0 |
| 1 | 1 | 0 | 0 | 0 |
| 0 | 1 | 0 | 0 | 0 |
| 1 | 1 | 0 | 0 | 0 |
| 0 | 1 | 0 | 0 | 0 |
| 1 | 1 | 0 | 0 | 0 |
| 0 | 1 | 0 | 0 | 0 |
| 1 | 1 | 0 | 0 | 0 |
| 0 | 1 | 0 | 0 | 0 |
| 1 | 1 | 0 | 0 | 0 |
| 0 | 0 | 0 | 0 | 1 |
| 1 | 1 | 0 | 0 | 0 |

|    |   |   |   |   |
|----|---|---|---|---|
| 0  | 1 | 0 | 0 | 0 |
| 0  | 1 | 0 | 0 | 0 |
| 1  | 1 | 0 | 0 | 0 |
| 1  | 0 | 0 | 0 | 1 |
| 0  | 1 | 0 | 0 | 0 |
| 0  | 1 | 0 | 0 | 0 |
| 0  | 1 | 0 | 0 | 0 |
| 1  | 1 | 0 | 0 | 0 |
| 1  | 1 | 0 | 0 | 0 |
| 1  | 1 | 0 | 0 | 0 |
| 1  | 1 | 0 | 0 | 0 |
| 1  | 1 | 0 | 0 | 0 |
| 1  | 1 | 0 | 0 | 0 |
| 1  | 1 | 0 | 0 | 0 |
| 0  | 1 | 0 | 0 | 0 |
| 0  | 1 | 0 | 0 | 0 |
| 1  | 1 | 0 | 0 | 0 |
| 1  | 1 | 0 | 0 | 0 |
| 0  | 1 | 0 | 0 | 0 |
| 0  | 1 | 0 | 0 | 0 |
| 99 | 1 | 0 | 0 | 0 |
| 0  | 1 | 0 | 0 | 0 |
| 1  | 1 | 0 | 0 | 0 |
| 2  | 0 | 0 | 0 | 0 |
| 1  | 0 | 0 | 0 | 0 |
| 0  | 1 | 0 | 0 | 0 |
| 0  | 1 | 0 | 0 | 0 |
| 1  | 0 | 0 | 0 | 1 |
| 0  | 1 | 0 | 0 | 0 |
| 0  | 0 | 0 | 0 | 0 |
| 1  | 1 | 0 | 0 | 0 |
| 1  | 0 | 0 | 0 | 1 |
| 0  | 1 | 0 | 0 | 0 |
| 1  | 1 | 0 | 0 | 0 |
| 0  | 1 | 0 | 0 | 0 |
| 1  | 1 | 0 | 0 | 0 |
| 1  | 1 | 0 | 0 | 0 |
| 1  | 1 | 0 | 0 | 0 |
| 1  | 1 | 0 | 0 | 0 |
| 1  | 1 | 0 | 0 | 0 |
| 0  | 1 | 0 | 0 | 0 |
| 99 | 0 | 0 | 1 | 0 |
| 1  | 0 | 0 | 0 | 1 |
| 0  | 1 | 0 | 0 | 0 |
| 1  | 1 | 0 | 0 | 0 |
| 1  | 0 | 0 | 0 | 1 |
| 1  | 0 | 0 | 0 | 1 |
| 0  | 1 | 0 | 0 | 0 |

|    |   |   |   |   |
|----|---|---|---|---|
| 1  | 1 | 0 | 0 | 1 |
| 0  | 0 | 0 | 0 | 0 |
| 1  | 1 | 0 | 0 | 0 |
| 0  | 1 | 0 | 0 | 0 |
| 1  | 1 | 0 | 0 | 0 |
| 1  | 1 | 0 | 0 | 0 |
| 0  | 1 | 0 | 0 | 0 |
| 1  | 1 | 0 | 0 | 0 |
| 0  | 1 | 0 | 0 | 0 |
| 1  | 1 | 0 | 0 | 0 |
| 1  | 1 | 0 | 0 | 0 |
| 0  | 1 | 0 | 0 | 0 |
| 0  | 1 | 0 | 0 | 0 |
| 1  | 0 | 0 | 0 | 0 |
| 0  | 1 | 0 | 0 | 0 |
| 0  | 1 | 0 | 0 | 0 |
| 99 | 0 | 0 | 0 | 1 |
| 1  | 1 | 0 | 0 | 0 |
| 0  | 1 | 0 | 0 | 0 |
| 1  | 1 | 0 | 0 | 0 |
| 0  | 1 | 0 | 0 | 0 |
| 0  | 1 | 0 | 0 | 0 |
| 1  | 1 | 0 | 0 | 0 |
| 0  | 1 | 0 | 0 | 0 |
| 1  | 1 | 0 | 0 | 0 |
| 0  | 1 | 0 | 0 | 0 |
| 1  | 1 | 0 | 0 | 0 |
| 0  | 0 | 0 | 0 | 0 |
| 1  | 1 | 0 | 0 | 0 |
| 0  | 1 | 0 | 0 | 0 |
| 1  | 1 | 0 | 0 | 0 |
| 1  | 1 | 0 | 0 | 0 |
| 1  | 0 | 0 | 0 | 0 |
| 0  | 1 | 0 | 0 | 0 |
| 1  | 1 | 0 | 0 | 0 |
| 0  | 1 | 0 | 0 | 0 |
| 1  | 1 | 0 | 0 | 0 |
| 1  | 1 | 0 | 0 | 0 |
| 1  | 1 | 0 | 0 | 0 |
| 0  | 1 | 0 | 0 | 0 |
| 1  | 1 | 0 | 0 | 0 |
| 1  | 1 | 0 | 0 | 0 |
| 0  | 1 | 0 | 0 | 0 |
| 0  | 1 | 0 | 0 | 0 |
| 1  | 1 | 0 | 0 | 0 |
| 0  | 1 | 0 | 0 | 0 |
| 1  | 1 | 0 | 0 | 0 |
| 0  | 1 | 0 | 0 | 0 |
| 1  | 1 | 0 | 0 | 0 |
| 0  | 1 | 0 | 0 | 0 |
| 0  | 1 | 0 | 0 | 0 |



|   |   |   |   |   |
|---|---|---|---|---|
| 1 | 1 | 0 | 0 | 0 |
| 0 | 1 | 0 | 0 | 0 |
| 1 | 0 | 0 | 0 | 1 |
| 0 | 1 | 0 | 0 | 0 |
| 3 | 0 | 0 | 0 | 1 |
| 0 | 1 | 0 | 0 | 0 |
| 1 | 1 | 0 | 0 | 0 |
| 0 | 1 | 0 | 0 | 0 |
| 3 | 0 | 0 | 0 | 0 |
| 0 | 1 | 0 | 0 | 0 |
| 2 | 0 | 0 | 0 | 0 |
| 1 | 1 | 0 | 0 | 0 |
| 1 | 1 | 0 | 0 | 0 |
| 1 | 0 | 0 | 0 | 0 |
| 1 | 1 | 0 | 0 | 0 |
| 0 | 1 | 0 | 0 | 0 |
| 1 | 1 | 0 | 0 | 0 |
| 1 | 1 | 0 | 0 | 0 |
| 1 | 0 | 0 | 0 | 0 |
| 0 | 1 | 0 | 0 | 0 |
| 0 | 1 | 0 | 0 | 0 |
| 1 | 0 | 1 | 1 | 0 |
| 0 | 1 | 0 | 0 | 0 |
| 0 | 1 | 0 | 0 | 0 |
| 0 | 1 | 0 | 0 | 0 |
| 0 | 1 | 0 | 0 | 0 |
| 0 | 1 | 0 | 0 | 0 |
| 0 | 1 | 0 | 0 | 0 |
| 1 | 1 | 0 | 0 | 0 |
| 0 | 1 | 0 | 0 | 0 |
| 0 | 1 | 0 | 0 | 0 |
| 1 | 1 | 0 | 0 | 0 |
| 1 | 0 | 0 | 0 | 1 |
| 1 | 1 | 0 | 0 | 0 |
| 0 | 1 | 0 | 0 | 0 |
| 1 | 1 | 0 | 0 | 0 |
| 3 | 0 | 0 | 0 | 0 |
| 0 | 1 | 0 | 0 | 0 |
| 0 | 1 | 0 | 0 | 0 |
| 0 | 1 | 0 | 0 | 0 |
| 0 | 1 | 0 | 0 | 0 |
| 1 | 1 | 0 | 0 | 0 |
| 0 | 1 | 0 | 0 | 0 |
| 1 | 1 | 0 | 0 | 0 |
| 1 | 1 | 0 | 0 | 0 |
| 0 | 1 | 0 | 0 | 0 |
| 1 | 1 | 0 | 0 | 0 |
| 0 | 1 | 0 | 0 | 0 |
| 1 | 1 | 0 | 0 | 0 |
| 1 | 1 | 0 | 0 | 0 |
| 0 | 1 | 0 | 0 | 0 |
| 1 | 1 | 0 | 0 | 0 |

|   |   |   |   |   |
|---|---|---|---|---|
| 0 | 1 | 0 | 0 | 0 |
| 0 | 1 | 0 | 0 | 0 |
| 0 | 1 | 0 | 0 | 0 |
| 1 | 1 | 0 | 0 | 0 |
| 3 | 0 | 1 | 0 | 0 |
| 3 | 0 | 0 | 0 | 1 |
| 0 | 1 | 0 | 0 | 0 |
| 0 | 0 | 1 | 0 | 0 |
| 0 | 1 | 0 | 0 | 0 |
| 0 | 1 | 0 | 0 | 0 |
| 1 | 1 | 0 | 0 | 0 |
| 1 | 1 | 0 | 0 | 0 |
| 0 | 1 | 0 | 0 | 0 |
| 1 | 1 | 0 | 0 | 0 |
| 1 | 1 | 0 | 0 | 0 |
| 1 | 1 | 0 | 0 | 0 |
| 1 | 1 | 0 | 0 | 0 |
| 0 | 1 | 0 | 0 | 0 |
| 0 | 1 | 0 | 0 | 0 |
| 1 | 1 | 0 | 0 | 0 |
| 0 | 1 | 0 | 0 | 0 |
| 1 | 1 | 0 | 0 | 0 |
| 0 | 1 | 0 | 0 | 0 |
| 1 | 1 | 0 | 0 | 0 |
| 0 | 1 | 0 | 0 | 0 |
| 1 | 1 | 0 | 0 | 0 |
| 0 | 1 | 0 | 0 | 0 |
| 1 | 1 | 0 | 0 | 0 |
| 0 | 1 | 0 | 0 | 0 |
| 1 | 1 | 0 | 0 | 0 |
| 0 | 1 | 0 | 0 | 0 |
| 1 | 1 | 0 | 0 | 0 |
| 1 | 1 | 0 | 0 | 0 |
| 1 | 1 | 0 | 0 | 0 |
| 3 | 1 | 0 | 0 | 0 |
| 1 | 1 | 0 | 0 | 0 |
| 0 | 0 | 0 | 0 | 0 |
| 1 | 1 | 0 | 0 | 0 |
| 1 | 1 | 0 | 0 | 0 |
| 1 | 1 | 0 | 0 | 0 |
| 0 | 1 | 0 | 0 | 0 |
| 1 | 1 | 0 | 0 | 0 |

|   |   |   |   |   |
|---|---|---|---|---|
| 1 | 0 | 0 | 0 | 0 |
| 0 | 1 | 0 | 0 | 0 |
| 0 | 1 | 0 | 0 | 0 |
| 1 | 1 | 0 | 0 | 0 |
| 0 | 1 | 0 | 0 | 0 |
| 0 | 0 | 0 | 0 | 0 |
| 0 | 0 | 0 | 0 | 0 |
| 1 | 1 | 0 | 0 | 0 |
| 3 | 1 | 1 | 0 | 0 |
| 0 | 1 | 0 | 0 | 0 |
| 1 | 1 | 0 | 0 | 0 |
| 1 | 0 | 0 | 0 | 0 |
| 0 | 1 | 0 | 0 | 0 |
| 0 | 1 | 0 | 0 | 0 |
| 1 | 1 | 0 | 0 | 0 |
| 1 | 0 | 0 | 0 | 0 |
| 0 | 1 | 0 | 0 | 0 |
| 0 | 1 | 0 | 0 | 0 |
| 1 | 1 | 0 | 0 | 0 |
| 1 | 0 | 0 | 0 | 1 |
| 0 | 1 | 0 | 0 | 0 |
| 1 | 1 | 0 | 0 | 0 |
| 0 | 1 | 0 | 0 | 0 |
| 0 | 1 | 0 | 0 | 0 |
| 0 | 1 | 0 | 0 | 0 |
| 1 | 1 | 0 | 0 | 0 |
| 1 | 0 | 1 | 0 | 0 |
| 0 | 1 | 0 | 0 | 0 |
| 0 | 1 | 0 | 0 | 0 |
| 0 | 1 | 0 | 0 | 0 |
| 1 | 1 | 0 | 0 | 0 |
| 1 | 0 | 1 | 0 | 0 |
| 0 | 1 | 0 | 0 | 0 |
| 0 | 1 | 0 | 0 | 0 |
| 1 | 0 | 0 | 0 | 1 |
| 0 | 1 | 0 | 0 | 0 |
| 0 | 1 | 0 | 0 | 0 |
| 1 | 0 | 0 | 0 | 1 |
| 1 | 1 | 0 | 0 | 0 |
| 1 | 1 | 0 | 0 | 0 |
| 1 | 1 | 0 | 0 | 0 |
| 0 | 1 | 0 | 0 | 0 |
| 1 | 1 | 0 | 0 | 0 |
| 0 | 1 | 0 | 0 | 0 |
| 0 | 0 | 0 | 0 | 0 |
| 0 | 1 | 0 | 0 | 0 |
| 0 | 1 | 0 | 0 | 0 |
| 1 | 0 | 0 | 0 | 0 |

|   |   |   |   |   |
|---|---|---|---|---|
| 1 | 1 | 0 | 0 | 0 |
| 0 | 1 | 0 | 0 | 0 |
| 0 | 1 | 0 | 0 | 0 |
| 0 | 1 | 0 | 0 | 0 |
| 1 | 1 | 0 | 0 | 0 |
| 1 | 1 | 0 | 0 | 0 |
| 3 | 1 | 1 | 1 | 1 |
| 0 | 1 | 0 | 0 | 0 |
| 0 | 1 | 0 | 0 | 0 |
| 0 | 1 | 0 | 0 | 0 |
| 1 | 1 | 0 | 0 | 0 |
| 1 | 1 | 0 | 0 | 0 |
| 1 | 1 | 0 | 0 | 0 |
| 1 | 1 | 0 | 0 | 0 |
| 1 | 1 | 0 | 0 | 0 |
| 1 | 1 | 0 | 0 | 0 |
| 1 | 1 | 0 | 0 | 0 |
| 0 | 0 | 0 | 0 | 0 |
| 1 | 1 | 0 | 0 | 0 |
| 1 | 1 | 0 | 0 | 0 |
| 1 | 1 | 0 | 0 | 0 |
| 0 | 1 | 0 | 0 | 0 |
| 1 | 1 | 0 | 0 | 0 |
| 0 | 1 | 0 | 0 | 0 |
| 1 | 1 | 0 | 0 | 0 |
| 0 | 1 | 0 | 0 | 0 |
| 1 | 1 | 0 | 0 | 0 |
| 0 | 1 | 0 | 0 | 0 |
| 0 | 1 | 0 | 0 | 0 |
| 0 | 1 | 0 | 0 | 0 |
| 0 | 1 | 0 | 0 | 0 |
| 0 | 1 | 0 | 0 | 0 |
| 0 | 1 | 0 | 0 | 0 |
| 3 | 0 | 0 | 0 | 0 |
| 0 | 1 | 0 | 0 | 0 |
| 0 | 1 | 0 | 0 | 0 |
| 0 | 1 | 0 | 0 | 0 |
| 0 | 1 | 0 | 0 | 0 |
| 1 | 1 | 0 | 0 | 0 |
| 1 | 1 | 0 | 0 | 0 |
| 0 | 0 | 0 | 0 | 0 |
| 1 | 1 | 0 | 0 | 0 |
| 0 | 1 | 0 | 0 | 0 |
| 1 | 0 | 0 | 0 | 0 |
| 1 | 0 | 0 | 0 | 0 |
| 0 | 1 | 0 | 0 | 0 |
| 1 | 0 | 0 | 0 | 0 |
| 1 | 1 | 0 | 0 | 0 |
| 0 | 1 | 0 | 0 | 0 |

|   |   |   |   |   |
|---|---|---|---|---|
| 0 | 1 | 0 | 0 | 0 |
| 1 | 1 | 0 | 0 | 0 |
| 0 | 0 | 0 | 0 | 0 |
| 1 | 1 | 0 | 0 | 0 |
| 1 | 1 | 0 | 0 | 0 |
| 0 | 0 | 0 | 0 | 0 |
| 1 | 1 | 0 | 0 | 0 |
| 0 | 1 | 0 | 0 | 0 |
| 0 | 0 | 0 | 0 | 0 |
| 1 | 1 | 0 | 0 | 0 |
| 0 | 1 | 0 | 0 | 0 |
| 1 | 1 | 0 | 0 | 0 |
| 0 | 0 | 0 | 0 | 0 |
| 1 | 0 | 0 | 0 | 0 |
| 0 | 1 | 0 | 0 | 0 |
| 1 | 1 | 0 | 0 | 0 |
| 1 | 1 | 0 | 0 | 0 |
| 1 | 1 | 0 | 0 | 0 |
| 1 | 1 | 0 | 0 | 0 |
| 0 | 1 | 0 | 0 | 0 |
| 0 | 1 | 0 | 0 | 0 |
| 1 | 1 | 0 | 0 | 0 |
| 1 | 0 | 0 | 0 | 0 |
| 1 | 1 | 0 | 0 | 0 |
| 0 | 0 | 0 | 0 | 0 |
| 1 | 1 | 0 | 0 | 0 |
| 0 | 1 | 0 | 0 | 0 |
| 0 | 1 | 0 | 0 | 0 |
| 1 | 1 | 0 | 0 | 0 |
| 0 | 0 | 0 | 0 | 0 |
| 0 | 1 | 0 | 0 | 0 |
| 0 | 1 | 0 | 0 | 0 |
| 0 | 1 | 0 | 0 | 0 |
| 0 | 0 | 0 | 0 | 0 |
| 0 | 1 | 0 | 0 | 0 |
| 0 | 1 | 0 | 0 | 0 |
| 0 | 1 | 0 | 0 | 0 |
| 1 | 1 | 0 | 0 | 0 |
| 1 | 1 | 0 | 0 | 0 |
| 0 | 1 | 0 | 0 | 0 |
| 1 | 0 | 0 | 0 | 0 |
| 0 | 1 | 0 | 0 | 0 |

|   |   |   |   |   |
|---|---|---|---|---|
| 0 | 1 | 0 | 0 | 0 |
| 1 | 1 | 0 | 0 | 0 |
| 0 | 1 | 0 | 0 | 0 |
| 1 | 0 | 0 | 0 | 0 |
| 1 | 1 | 0 | 0 | 0 |
| 1 | 1 | 0 | 0 | 0 |
| 1 | 0 | 0 | 0 | 0 |
| 0 | 1 | 0 | 0 | 0 |
| 0 | 1 | 0 | 0 | 0 |
| 0 | 0 | 0 | 0 | 0 |
| 1 | 1 | 0 | 0 | 0 |
| 1 | 1 | 0 | 0 | 0 |
| 0 | 0 | 0 | 0 | 0 |
| 0 | 1 | 0 | 0 | 0 |
| 1 | 1 | 0 | 0 | 0 |
| 1 | 1 | 0 | 0 | 0 |
| 0 | 1 | 0 | 0 | 0 |
| 0 | 1 | 0 | 0 | 0 |
| 1 | 1 | 0 | 0 | 0 |
| 1 | 1 | 0 | 0 | 0 |
| 0 | 1 | 0 | 0 | 0 |
| 1 | 1 | 0 | 0 | 0 |
| 0 | 1 | 0 | 0 | 0 |
| 0 | 1 | 0 | 0 | 0 |
| 1 | 1 | 0 | 0 | 0 |
| 1 | 0 | 0 | 0 | 0 |
| 1 | 1 | 0 | 0 | 0 |
| 0 | 0 | 0 | 0 | 0 |
| 1 | 1 | 0 | 0 | 0 |
| 0 | 1 | 0 | 0 | 0 |
| 0 | 1 | 0 | 0 | 0 |
| 1 | 1 | 0 | 0 | 0 |
| 0 | 1 | 0 | 0 | 0 |
| 1 | 1 | 0 | 0 | 0 |
| 3 | 1 | 0 | 0 | 0 |
| 1 | 1 | 0 | 0 | 0 |
| 0 | 1 | 0 | 0 | 0 |
| 1 | 1 | 0 | 0 | 0 |
| 1 | 0 | 0 | 0 | 1 |
| 1 | 1 | 0 | 0 | 0 |
| 0 | 1 | 0 | 0 | 0 |
| 1 | 1 | 0 | 0 | 0 |
| 0 | 1 | 0 | 0 | 0 |
| 1 | 1 | 0 | 0 | 0 |
| 0 | 1 | 0 | 0 | 0 |
| 0 | 1 | 0 | 0 | 0 |
| 1 | 1 | 0 | 0 | 0 |

|   |   |   |   |   |
|---|---|---|---|---|
| 0 | 0 | 0 | 0 | 0 |
| 0 | 1 | 0 | 0 | 0 |
| 0 | 1 | 0 | 0 | 0 |
| 0 | 1 | 0 | 0 | 0 |
| 0 | 0 | 0 | 0 | 0 |
| 0 | 1 | 0 | 0 | 0 |
| 0 | 1 | 0 | 0 | 0 |
| 0 | 1 | 0 | 0 | 0 |
| 0 | 1 | 0 | 0 | 0 |
| 0 | 1 | 0 | 0 | 0 |
| 0 | 0 | 0 | 0 | 0 |
| 1 | 0 | 0 | 0 | 0 |
| 1 | 1 | 0 | 0 | 0 |
| 1 | 1 | 0 | 0 | 0 |
| 0 | 1 | 0 | 0 | 0 |
| 1 | 1 | 0 | 0 | 0 |
| 1 | 1 | 0 | 0 | 0 |
| 0 | 0 | 0 | 0 | 0 |
| 1 | 1 | 0 | 0 | 0 |
| 0 | 0 | 0 | 0 | 0 |
| 1 | 1 | 0 | 0 | 0 |
| 0 | 1 | 0 | 0 | 0 |
| 1 | 1 | 0 | 0 | 0 |
| 1 | 0 | 0 | 0 | 0 |
| 1 | 1 | 0 | 0 | 0 |
| 1 | 1 | 0 | 0 | 0 |
| 1 | 1 | 0 | 0 | 0 |
| 3 | 0 | 0 | 0 | 0 |
| 0 | 1 | 0 | 0 | 0 |
| 0 | 0 | 0 | 0 | 0 |
| 1 | 1 | 0 | 0 | 0 |
| 1 | 0 | 0 | 0 | 0 |
| 1 | 0 | 0 | 0 | 0 |
| 0 | 1 | 0 | 0 | 0 |
| 1 | 1 | 0 | 0 | 0 |
| 1 | 1 | 0 | 0 | 0 |
| 0 | 1 | 0 | 0 | 0 |
| 1 | 1 | 0 | 0 | 0 |
| 0 | 0 | 0 | 0 | 0 |
| 1 | 1 | 0 | 0 | 0 |
| 0 | 1 | 0 | 0 | 0 |
| 1 | 1 | 0 | 0 | 0 |
| 1 | 1 | 0 | 0 | 0 |
| 0 | 1 | 0 | 0 | 0 |
| 1 | 1 | 0 | 0 | 0 |
| 1 | 1 | 0 | 0 | 0 |
| 0 | 1 | 0 | 0 | 0 |
| 0 | 1 | 0 | 0 | 0 |

|    |   |   |   |   |
|----|---|---|---|---|
| 1  | 1 | 0 | 0 | 0 |
| 1  | 1 | 0 | 0 | 0 |
| 1  | 1 | 0 | 0 | 0 |
| 0  | 1 | 0 | 0 | 0 |
| 0  | 1 | 0 | 0 | 0 |
| 99 | 1 | 0 | 0 | 0 |
| 1  | 1 | 0 | 0 | 0 |
| 1  | 0 | 0 | 0 | 1 |
| 0  | 1 | 0 | 0 | 0 |
| 0  | 1 | 0 | 0 | 0 |
| 3  | 0 | 0 | 0 | 1 |
| 0  | 1 | 0 | 0 | 0 |
| 1  | 1 | 0 | 0 | 0 |
| 0  | 1 | 0 | 0 | 0 |
| 0  | 0 | 0 | 0 | 0 |
| 1  | 1 | 0 | 0 | 0 |
| 0  | 1 | 0 | 0 | 0 |
| 1  | 0 | 0 | 0 | 0 |
| 0  | 1 | 0 | 0 | 0 |
| 0  | 1 | 0 | 0 | 0 |
| 1  | 1 | 0 | 0 | 0 |
| 0  | 1 | 0 | 0 | 0 |
| 1  | 1 | 0 | 0 | 0 |
| 0  | 1 | 0 | 0 | 0 |
| 1  | 1 | 0 | 0 | 0 |
| 1  | 1 | 0 | 0 | 0 |
| 1  | 1 | 0 | 0 | 0 |
| 1  | 1 | 0 | 0 | 0 |
| 0  | 1 | 0 | 0 | 0 |
| 1  | 1 | 0 | 0 | 0 |
| 1  | 1 | 0 | 0 | 0 |
| 1  | 1 | 0 | 0 | 0 |
| 0  | 1 | 0 | 0 | 0 |
| 1  | 1 | 0 | 0 | 0 |
| 0  | 1 | 0 | 0 | 0 |
| 1  | 1 | 0 | 0 | 0 |
| 1  | 1 | 0 | 0 | 0 |
| 1  | 1 | 0 | 0 | 0 |
| 0  | 1 | 0 | 0 | 0 |
| 0  | 1 | 0 | 0 | 0 |
| 1  | 1 | 0 | 0 | 0 |
| 1  | 1 | 0 | 0 | 0 |
| 1  | 1 | 0 | 0 | 0 |
| 0  | 1 | 0 | 0 | 0 |
| 0  | 1 | 0 | 0 | 0 |
| 1  | 1 | 0 | 0 | 0 |
| 1  | 1 | 0 | 0 | 0 |
| 1  | 0 | 0 | 0 | 0 |
| 0  | 1 | 0 | 0 | 0 |
| 1  | 1 | 0 | 0 | 0 |



|    |   |   |   |   |
|----|---|---|---|---|
| 1  | 1 | 0 | 0 | 0 |
| 0  | 1 | 0 | 0 | 0 |
| 0  | 1 | 0 | 0 | 0 |
| 0  | 1 | 0 | 0 | 0 |
| 1  | 1 | 0 | 0 | 0 |
| 0  | 1 | 0 | 0 | 0 |
| 1  | 1 | 0 | 0 | 0 |
| 0  | 1 | 0 | 0 | 0 |
| 0  | 1 | 0 | 0 | 0 |
| 1  | 1 | 0 | 0 | 0 |
| 0  | 1 | 0 | 0 | 0 |
| 0  | 1 | 0 | 0 | 0 |
| 0  | 1 | 0 | 0 | 0 |
| 1  | 1 | 0 | 0 | 0 |
| 0  | 0 | 0 | 0 | 0 |
| 0  | 0 | 0 | 0 | 0 |
| 0  | 1 | 0 | 0 | 0 |
| 1  | 1 | 0 | 0 | 0 |
| 0  | 1 | 0 | 0 | 0 |
| 0  | 0 | 0 | 0 | 0 |
| 0  | 1 | 0 | 0 | 0 |
| 1  | 1 | 0 | 0 | 0 |
| 0  | 0 | 0 | 0 | 0 |
| 0  | 0 | 0 | 0 | 0 |
| 1  | 1 | 0 | 0 | 0 |
| 0  | 1 | 0 | 0 | 0 |
| 0  | 0 | 0 | 0 | 0 |
| 1  | 1 | 0 | 0 | 0 |
| 0  | 1 | 0 | 0 | 0 |
| 0  | 0 | 0 | 0 | 0 |
| 1  | 1 | 0 | 0 | 0 |
| 0  | 1 | 0 | 0 | 0 |
| 0  | 0 | 0 | 0 | 0 |
| 1  | 1 | 0 | 0 | 0 |
| 0  | 1 | 0 | 0 | 0 |
| 1  | 1 | 0 | 0 | 0 |
| 0  | 1 | 0 | 0 | 0 |
| 1  | 0 | 0 | 0 | 0 |
| 1  | 0 | 0 | 0 | 0 |
| 99 | 0 | 0 | 0 | 0 |
| 1  | 1 | 0 | 0 | 0 |
| 1  | 1 | 0 | 0 | 0 |
| 1  | 0 | 0 | 0 | 0 |
| 0  | 1 | 0 | 0 | 0 |
| 1  | 0 | 0 | 0 | 0 |
| 1  | 1 | 0 | 0 | 0 |

|   |   |   |   |   |
|---|---|---|---|---|
| 1 | 1 | 0 | 0 | 0 |
| 0 | 1 | 0 | 0 | 0 |
| 1 | 1 | 0 | 0 | 0 |
| 0 | 0 | 0 | 0 | 0 |
| 1 | 0 | 0 | 0 | 0 |
| 1 | 0 | 0 | 0 | 0 |
| 0 | 1 | 0 | 0 | 0 |
| 1 | 0 | 0 | 0 | 1 |
| 0 | 1 | 0 | 0 | 0 |
| 1 | 1 | 0 | 0 | 0 |
| 0 | 1 | 0 | 0 | 0 |
| 1 | 1 | 0 | 0 | 0 |
| 2 | 0 | 0 | 1 | 0 |
| 1 | 0 | 0 | 0 | 0 |
| 1 | 0 | 0 | 0 | 0 |
| 0 | 1 | 0 | 0 | 0 |
| 0 | 0 | 0 | 0 | 0 |
| 1 | 1 | 0 | 0 | 0 |
| 1 | 1 | 0 | 0 | 0 |
| 0 | 1 | 0 | 0 | 0 |
| 0 | 1 | 0 | 0 | 0 |
| 1 | 1 | 0 | 0 | 0 |
| 0 | 1 | 0 | 0 | 0 |
| 1 | 1 | 0 | 0 | 0 |
| 0 | 1 | 0 | 0 | 0 |
| 1 | 1 | 0 | 0 | 0 |
| 0 | 1 | 0 | 0 | 0 |
| 1 | 1 | 0 | 0 | 0 |
| 0 | 1 | 0 | 0 | 0 |
| 1 | 1 | 0 | 0 | 0 |
| 0 | 1 | 0 | 0 | 0 |
| 1 | 0 | 1 | 0 | 0 |
| 0 | 1 | 0 | 0 | 0 |
| 0 | 1 | 0 | 0 | 0 |
| 0 | 1 | 0 | 0 | 0 |
| 1 | 1 | 0 | 0 | 0 |
| 0 | 1 | 0 | 0 | 0 |
| 0 | 1 | 0 | 0 | 0 |
| 0 | 1 | 0 | 0 | 0 |
| 0 | 1 | 0 | 0 | 0 |
| 0 | 0 | 0 | 0 | 0 |
| 1 | 0 | 0 | 0 | 1 |
| 0 | 1 | 0 | 0 | 0 |
| 1 | 1 | 0 | 0 | 0 |

|   |   |   |   |   |
|---|---|---|---|---|
| 0 | 1 | 0 | 0 | 0 |
| 0 | 1 | 0 | 0 | 0 |
| 0 | 1 | 0 | 0 | 0 |
| 0 | 1 | 0 | 0 | 0 |
| 1 | 1 | 0 | 0 | 0 |
| 3 | 0 | 0 | 0 | 0 |
| 0 | 1 | 0 | 0 | 0 |
| 1 | 1 | 0 | 0 | 0 |
| 0 | 1 | 0 | 0 | 0 |
| 0 | 1 | 0 | 0 | 0 |
| 0 | 1 | 0 | 0 | 0 |
| 0 | 1 | 0 | 0 | 0 |
| 1 | 1 | 0 | 0 | 0 |
| 1 | 1 | 0 | 0 | 0 |
| 0 | 1 | 0 | 0 | 0 |
| 1 | 1 | 0 | 0 | 0 |
| 0 | 1 | 0 | 0 | 0 |
| 1 | 1 | 0 | 0 | 0 |
| 0 | 1 | 0 | 0 | 0 |
| 0 | 1 | 0 | 0 | 0 |
| 0 | 1 | 0 | 0 | 0 |
| 0 | 1 | 0 | 0 | 0 |
| 1 | 1 | 0 | 0 | 0 |
| 1 | 1 | 0 | 0 | 0 |
| 1 | 1 | 0 | 0 | 0 |
| 0 | 1 | 0 | 0 | 0 |
| 1 | 1 | 0 | 0 | 0 |
| 0 | 1 | 0 | 0 | 0 |
| 0 | 1 | 0 | 0 | 0 |
| 0 | 1 | 0 | 0 | 0 |
| 0 | 1 | 0 | 0 | 0 |
| 0 | 1 | 0 | 0 | 0 |
| 0 | 1 | 0 | 0 | 0 |
| 0 | 1 | 0 | 0 | 0 |
| 1 | 0 | 0 | 0 | 0 |
| 0 | 0 | 0 | 0 | 0 |
| 1 | 1 | 0 | 0 | 0 |
| 0 | 1 | 0 | 0 | 0 |
| 1 | 0 | 0 | 0 | 0 |
| 0 | 1 | 0 | 0 | 0 |
| 0 | 1 | 0 | 0 | 0 |
| 0 | 1 | 0 | 0 | 0 |
| 0 | 0 | 0 | 0 | 0 |
| 1 | 0 | 0 | 0 | 0 |
| 1 | 1 | 0 | 0 | 0 |
| 0 | 0 | 0 | 0 | 0 |
| 1 | 0 | 0 | 0 | 0 |
| 1 | 1 | 0 | 0 | 0 |
| 0 | 0 | 0 | 0 | 0 |

|    |   |   |   |   |
|----|---|---|---|---|
| 0  | 0 | 0 | 0 | 0 |
| 1  | 1 | 0 | 0 | 0 |
| 0  | 1 | 0 | 0 | 0 |
| 0  | 1 | 0 | 0 | 0 |
| 1  | 1 | 0 | 0 | 0 |
| 1  | 1 | 0 | 0 | 0 |
| 0  | 0 | 0 | 0 | 0 |
| 0  | 0 | 0 | 0 | 0 |
| 1  | 1 | 0 | 0 | 0 |
| 1  | 1 | 0 | 0 | 0 |
| 0  | 1 | 0 | 0 | 0 |
| 99 | 0 | 0 | 0 | 0 |
| 1  | 1 | 0 | 0 | 0 |
| 1  | 1 | 0 | 0 | 0 |
| 0  | 0 | 0 | 0 | 0 |
| 0  | 1 | 0 | 0 | 0 |
| 1  | 1 | 0 | 0 | 0 |
| 0  | 0 | 0 | 0 | 0 |
| 0  | 0 | 0 | 0 | 0 |
| 0  | 1 | 0 | 0 | 0 |
| 0  | 1 | 0 | 0 | 0 |
| 0  | 1 | 0 | 0 | 0 |
| 0  | 0 | 0 | 0 | 0 |
| 0  | 0 | 0 | 0 | 0 |
| 0  | 1 | 0 | 0 | 0 |
| 1  | 0 | 0 | 0 | 0 |
| 0  | 1 | 0 | 0 | 0 |
| 0  | 1 | 0 | 0 | 0 |
| 1  | 1 | 0 | 0 | 0 |
| 0  | 0 | 0 | 0 | 0 |
| 1  | 0 | 0 | 0 | 0 |
| 0  | 1 | 0 | 0 | 0 |
| 0  | 1 | 0 | 0 | 0 |
| 0  | 1 | 0 | 0 | 0 |
| 1  | 1 | 0 | 0 | 0 |
| 0  | 1 | 0 | 0 | 0 |
| 1  | 1 | 0 | 0 | 0 |
| 0  | 1 | 0 | 0 | 0 |
| 1  | 1 | 0 | 0 | 0 |
| 0  | 0 | 0 | 0 | 0 |
| 1  | 1 | 0 | 0 | 0 |
| 0  | 0 | 0 | 0 | 0 |
| 1  | 1 | 0 | 0 | 0 |
| 1  | 1 | 0 | 0 | 0 |

|    |   |   |   |   |
|----|---|---|---|---|
| 0  | 1 | 0 | 0 | 0 |
| 1  | 1 | 0 | 0 | 0 |
| 0  | 1 | 0 | 0 | 0 |
| 0  | 1 | 0 | 0 | 0 |
| 1  | 1 | 0 | 0 | 0 |
| 1  | 1 | 0 | 0 | 0 |
| 1  | 1 | 0 | 0 | 0 |
| 0  | 1 | 0 | 0 | 0 |
| 1  | 1 | 0 | 0 | 0 |
| 1  | 1 | 0 | 0 | 0 |
| 3  | 1 | 0 | 0 | 0 |
| 0  | 1 | 0 | 0 | 0 |
| 1  | 1 | 0 | 0 | 0 |
| 99 | 1 | 0 | 0 | 0 |
| 1  | 1 | 0 | 0 | 0 |
| 0  | 1 | 0 | 0 | 0 |
| 0  | 1 | 0 | 0 | 0 |
| 0  | 1 | 0 | 0 | 0 |
| 1  | 1 | 0 | 0 | 0 |
| 0  | 1 | 0 | 0 | 0 |
| 1  | 1 | 0 | 0 | 0 |
| 0  | 1 | 0 | 0 | 0 |
| 1  | 1 | 0 | 0 | 0 |
| 1  | 1 | 0 | 0 | 0 |
| 1  | 1 | 0 | 0 | 0 |
| 0  | 1 | 0 | 0 | 0 |
| 1  | 1 | 0 | 0 | 0 |
| 0  | 1 | 0 | 0 | 0 |
| 1  | 1 | 0 | 0 | 0 |
| 0  | 1 | 0 | 0 | 0 |
| 1  | 1 | 0 | 0 | 0 |
| 0  | 1 | 0 | 0 | 0 |
| 0  | 1 | 0 | 0 | 0 |
| 1  | 1 | 0 | 0 | 0 |
| 0  | 1 | 0 | 0 | 0 |
| 0  | 1 | 0 | 0 | 0 |
| 1  | 0 | 0 | 1 | 0 |
| 0  | 0 | 0 | 0 | 0 |
| 1  | 1 | 0 | 0 | 0 |
| 0  | 0 | 0 | 0 | 0 |
| 0  | 1 | 0 | 0 | 0 |
| 0  | 1 | 0 | 0 | 0 |
| 0  | 0 | 0 | 0 | 0 |
| 0  | 0 | 0 | 0 | 0 |

|   |   |   |   |   |
|---|---|---|---|---|
| 0 | 0 | 0 | 0 | 0 |
| 1 | 0 | 0 | 0 | 0 |
| 0 | 1 | 0 | 0 | 0 |
| 0 | 1 | 0 | 0 | 0 |
| 1 | 0 | 0 | 0 | 0 |
| 0 | 0 | 0 | 0 | 1 |
| 1 | 1 | 0 | 0 | 0 |
| 0 | 1 | 0 | 0 | 0 |
| 1 | 0 | 0 | 0 | 0 |
| 0 | 1 | 0 | 0 | 0 |
| 0 | 1 | 0 | 0 | 0 |
| 1 | 1 | 0 | 0 | 0 |
| 1 | 1 | 0 | 0 | 0 |
| 1 | 1 | 0 | 0 | 0 |
| 1 | 1 | 0 | 0 | 0 |
| 0 | 1 | 0 | 0 | 0 |
| 1 | 1 | 0 | 0 | 0 |
| 0 | 0 | 0 | 0 | 0 |
| 1 | 1 | 0 | 0 | 0 |
| 0 | 1 | 0 | 0 | 0 |
| 0 | 1 | 0 | 1 | 0 |
| 1 | 0 | 0 | 0 | 0 |
| 1 | 0 | 0 | 0 | 0 |
| 0 | 1 | 0 | 0 | 0 |
| 1 | 1 | 0 | 0 | 0 |
| 0 | 1 | 0 | 0 | 0 |
| 1 | 1 | 0 | 0 | 0 |
| 1 | 1 | 0 | 0 | 0 |
| 1 | 1 | 0 | 0 | 0 |
| 0 | 1 | 0 | 0 | 0 |
| 1 | 1 | 0 | 0 | 0 |
| 0 | 1 | 0 | 0 | 0 |
| 1 | 1 | 0 | 0 | 0 |
| 1 | 1 | 0 | 0 | 0 |
| 1 | 1 | 0 | 0 | 0 |
| 0 | 1 | 0 | 0 | 0 |
| 1 | 1 | 0 | 0 | 0 |
| 0 | 1 | 0 | 0 | 0 |
| 1 | 1 | 0 | 0 | 0 |
| 0 | 1 | 0 | 0 | 0 |
| 1 | 1 | 0 | 0 | 0 |
| 0 | 1 | 0 | 0 | 0 |
| 1 | 1 | 0 | 0 | 0 |
| 0 | 1 | 0 | 0 | 0 |
| 1 | 1 | 0 | 0 | 0 |
| 0 | 1 | 0 | 0 | 0 |
| 1 | 1 | 0 | 0 | 0 |
| 0 | 0 | 0 | 0 | 0 |

|   |   |   |   |   |
|---|---|---|---|---|
| 0 | 1 | 0 | 0 | 0 |
| 1 | 1 | 0 | 0 | 0 |
| 1 | 1 | 0 | 0 | 0 |
| 0 | 1 | 0 | 0 | 0 |
| 1 | 1 | 0 | 0 | 0 |
| 0 | 1 | 0 | 0 | 0 |
| 1 | 0 | 0 | 0 | 0 |
| 1 | 1 | 0 | 0 | 0 |
| 0 | 1 | 0 | 0 | 0 |
| 1 | 1 | 0 | 0 | 0 |
| 0 | 1 | 0 | 0 | 0 |
| 1 | 1 | 0 | 0 | 0 |
| 0 | 1 | 0 | 0 | 0 |
| 1 | 1 | 0 | 0 | 0 |
| 0 | 1 | 0 | 0 | 0 |
| 1 | 1 | 0 | 0 | 0 |
| 0 | 0 | 0 | 0 | 0 |
| 0 | 1 | 0 | 0 | 0 |
| 1 | 1 | 0 | 0 | 0 |
| 0 | 1 | 0 | 0 | 0 |
| 1 | 1 | 0 | 0 | 0 |
| 0 | 1 | 0 | 0 | 0 |
| 0 | 1 | 0 | 0 | 0 |
| 1 | 1 | 0 | 0 | 0 |
| 0 | 1 | 0 | 0 | 0 |
| 0 | 1 | 0 | 0 | 0 |
| 1 | 1 | 0 | 0 | 0 |
| 3 | 0 | 0 | 0 | 1 |
| 1 | 1 | 0 | 0 | 0 |
| 1 | 1 | 0 | 0 | 0 |
| 0 | 1 | 0 | 0 | 0 |
| 1 | 1 | 0 | 0 | 0 |
| 2 | 0 | 0 | 0 | 0 |
| 3 | 0 | 0 | 0 | 0 |
| 1 | 1 | 0 | 0 | 0 |
| 3 | 0 | 0 | 1 | 0 |
| 0 | 1 | 0 | 0 | 0 |
| 1 | 1 | 0 | 0 | 0 |
| 1 | 1 | 0 | 0 | 0 |
| 1 | 1 | 0 | 0 | 0 |
| 0 | 1 | 0 | 0 | 0 |
| 0 | 1 | 0 | 0 | 0 |

|   |   |   |   |   |
|---|---|---|---|---|
| 1 | 1 | 0 | 0 | 0 |
| 1 | 1 | 0 | 0 | 0 |
| 1 | 1 | 0 | 0 | 0 |
| 0 | 0 | 0 | 0 | 0 |
| 1 | 1 | 0 | 0 | 0 |
| 1 | 1 | 0 | 0 | 0 |
| 0 | 0 | 0 | 0 | 0 |
| 1 | 1 | 0 | 0 | 0 |
| 0 | 1 | 0 | 0 | 0 |
| 0 | 1 | 0 | 0 | 0 |
| 0 | 0 | 0 | 0 | 0 |
| 0 | 1 | 0 | 0 | 0 |
| 0 | 1 | 0 | 0 | 0 |
| 0 | 1 | 0 | 0 | 0 |
| 0 | 1 | 0 | 0 | 0 |
| 1 | 1 | 0 | 0 | 0 |
| 1 | 0 | 0 | 0 | 0 |
| 1 | 1 | 0 | 0 | 0 |
| 1 | 1 | 0 | 0 | 0 |
| 1 | 1 | 0 | 0 | 0 |
| 1 | 1 | 0 | 0 | 0 |
| 1 | 1 | 0 | 0 | 0 |
| 0 | 1 | 0 | 0 | 0 |
| 0 | 1 | 0 | 0 | 0 |
| 1 | 1 | 0 | 0 | 0 |
| 0 | 1 | 0 | 0 | 0 |
| 1 | 1 | 0 | 0 | 0 |
| 1 | 1 | 0 | 0 | 0 |
| 1 | 1 | 0 | 0 | 0 |
| 0 | 1 | 0 | 0 | 1 |
| 1 | 1 | 0 | 0 | 0 |
| 0 | 0 | 0 | 0 | 0 |
| 1 | 1 | 0 | 0 | 0 |
| 1 | 1 | 0 | 0 | 0 |
| 1 | 1 | 0 | 0 | 0 |
| 0 | 1 | 0 | 0 | 0 |
| 0 | 1 | 0 | 0 | 0 |
| 1 | 1 | 0 | 0 | 0 |
| 1 | 1 | 0 | 0 | 0 |
| 0 | 1 | 0 | 0 | 0 |
| 0 | 1 | 0 | 0 | 0 |
| 1 | 1 | 0 | 0 | 1 |
| 1 | 1 | 0 | 0 | 0 |
| 0 | 1 | 0 | 0 | 0 |
| 1 | 1 | 0 | 0 | 0 |



|   |   |   |   |   |
|---|---|---|---|---|
| 1 | 1 | 0 | 0 | 0 |
| 0 | 1 | 0 | 0 | 0 |
| 1 | 0 | 0 | 0 | 1 |
| 1 | 1 | 0 | 0 | 0 |
| 0 | 1 | 0 | 0 | 0 |
| 1 | 1 | 0 | 0 | 0 |
| 0 | 1 | 0 | 0 | 0 |
| 1 | 1 | 0 | 0 | 0 |
| 0 | 1 | 0 | 0 | 0 |
| 1 | 1 | 0 | 0 | 0 |
| 1 | 0 | 0 | 0 | 0 |
| 0 | 1 | 0 | 0 | 0 |
| 1 | 1 | 0 | 0 | 0 |
| 1 | 1 | 0 | 0 | 0 |
| 1 | 0 | 0 | 0 | 0 |
| 1 | 0 | 0 | 0 | 0 |
| 0 | 1 | 0 | 0 | 0 |
| 1 | 1 | 0 | 0 | 0 |
| 1 | 1 | 0 | 0 | 0 |
| 1 | 1 | 0 | 0 | 0 |
| 1 | 0 | 0 | 0 | 0 |
| 3 | 0 | 0 | 0 | 0 |
| 0 | 1 | 0 | 0 | 0 |
| 1 | 1 | 0 | 0 | 0 |
| 0 | 1 | 0 | 0 | 0 |
| 0 | 1 | 0 | 0 | 0 |
| 1 | 1 | 0 | 0 | 0 |
| 0 | 1 | 0 | 0 | 0 |
| 1 | 1 | 0 | 0 | 0 |
| 1 | 1 | 0 | 0 | 0 |
| 1 | 1 | 0 | 0 | 0 |
| 0 | 1 | 0 | 0 | 0 |
| 0 | 1 | 0 | 0 | 0 |
| 1 | 1 | 0 | 0 | 0 |
| 1 | 0 | 0 | 0 | 0 |
| 0 | 1 | 0 | 0 | 0 |
| 0 | 1 | 0 | 0 | 0 |
| 0 | 1 | 0 | 0 | 0 |
| 0 | 1 | 0 | 0 | 0 |
| 0 | 1 | 0 | 0 | 0 |
| 0 | 1 | 0 | 0 | 0 |
| 0 | 1 | 0 | 0 | 0 |
| 0 | 0 | 0 | 1 | 0 |
| 0 | 1 | 0 | 0 | 0 |
| 1 | 1 | 0 | 0 | 0 |
| 1 | 1 | 0 | 0 | 0 |

|   |   |   |   |   |
|---|---|---|---|---|
| 0 | 1 | 0 | 0 | 0 |
| 1 | 1 | 0 | 0 | 0 |
| 1 | 1 | 0 | 0 | 0 |
| 0 | 0 | 0 | 0 | 0 |
| 0 | 0 | 0 | 0 | 0 |
| 1 | 0 | 0 | 0 | 0 |
| 0 | 1 | 0 | 0 | 0 |
| 1 | 1 | 0 | 0 | 0 |
| 0 | 1 | 0 | 0 | 0 |
| 1 | 0 | 0 | 0 | 0 |
| 0 | 1 | 0 | 0 | 0 |
| 0 | 0 | 0 | 0 | 0 |
| 1 | 1 | 0 | 0 | 0 |
| 1 | 1 | 0 | 0 | 0 |
| 0 | 0 | 0 | 0 | 0 |
| 0 | 1 | 0 | 0 | 0 |
| 0 | 1 | 0 | 0 | 0 |
| 0 | 0 | 0 | 0 | 0 |
| 1 | 1 | 0 | 0 | 0 |
| 1 | 1 | 0 | 0 | 0 |
| 0 | 0 | 0 | 0 | 1 |
| 1 | 1 | 0 | 0 | 0 |
| 0 | 1 | 0 | 0 | 0 |
| 1 | 1 | 0 | 0 | 0 |
| 0 | 1 | 0 | 0 | 0 |
| 1 | 0 | 0 | 0 | 0 |
| 0 | 0 | 0 | 0 | 0 |
| 1 | 0 | 0 | 0 | 0 |
| 1 | 1 | 0 | 0 | 0 |
| 1 | 0 | 0 | 0 | 0 |
| 0 | 1 | 0 | 0 | 0 |
| 1 | 1 | 0 | 0 | 0 |
| 1 | 1 | 0 | 0 | 0 |
| 0 | 1 | 0 | 0 | 0 |
| 0 | 0 | 0 | 0 | 0 |
| 0 | 1 | 0 | 0 | 0 |
| 0 | 1 | 0 | 0 | 0 |
| 0 | 1 | 0 | 0 | 0 |
| 1 | 1 | 0 | 0 | 0 |
| 0 | 1 | 0 | 0 | 0 |
| 0 | 1 | 0 | 0 | 0 |
| 1 | 1 | 0 | 0 | 0 |
| 0 | 1 | 0 | 0 | 0 |
| 1 | 1 | 0 | 0 | 0 |

|   |   |   |   |   |
|---|---|---|---|---|
| 0 | 1 | 0 | 0 | 0 |
| 1 | 1 | 0 | 0 | 0 |
| 0 | 0 | 0 | 0 | 0 |
| 0 | 1 | 0 | 0 | 0 |
| 1 | 1 | 0 | 0 | 0 |
| 0 | 0 | 0 | 0 | 0 |
| 0 | 1 | 0 | 0 | 0 |
| 1 | 1 | 0 | 0 | 0 |
| 1 | 1 | 0 | 0 | 0 |
| 0 | 1 | 0 | 0 | 0 |
| 0 | 1 | 0 | 0 | 0 |
| 0 | 1 | 0 | 0 | 0 |
| 0 | 1 | 0 | 0 | 0 |
| 0 | 1 | 0 | 0 | 0 |
| 1 | 1 | 0 | 0 | 0 |
| 1 | 1 | 0 | 0 | 0 |
| 1 | 1 | 0 | 0 | 0 |
| 1 | 1 | 0 | 0 | 0 |
| 0 | 0 | 0 | 0 | 0 |
| 1 | 0 | 0 | 0 | 0 |
| 1 | 1 | 0 | 0 | 0 |
| 1 | 1 | 0 | 0 | 0 |
| 1 | 0 | 0 | 0 | 0 |
| 0 | 0 | 0 | 0 | 0 |
| 1 | 1 | 0 | 0 | 0 |
| 1 | 0 | 0 | 0 | 1 |
| 1 | 1 | 0 | 0 | 0 |
| 1 | 1 | 0 | 0 | 0 |
| 1 | 0 | 0 | 0 | 1 |
| 0 | 1 | 0 | 0 | 0 |
| 1 | 1 | 0 | 0 | 0 |
| 1 | 1 | 0 | 0 | 0 |
| 0 | 1 | 0 | 0 | 0 |
| 0 | 1 | 0 | 0 | 0 |
| 0 | 1 | 0 | 0 | 0 |
| 0 | 1 | 0 | 0 | 0 |
| 0 | 1 | 0 | 0 | 0 |
| 1 | 1 | 0 | 0 | 0 |
| 1 | 1 | 0 | 0 | 0 |
| 0 | 1 | 0 | 0 | 0 |

|   |   |   |   |   |
|---|---|---|---|---|
| 1 | 1 | 0 | 0 | 0 |
| 0 | 1 | 0 | 0 | 0 |
| 0 | 1 | 0 | 0 | 0 |
| 1 | 1 | 0 | 0 | 0 |
| 0 | 1 | 0 | 0 | 0 |
| 1 | 0 | 0 | 0 | 0 |
| 0 | 0 | 0 | 0 | 0 |
| 0 | 1 | 0 | 0 | 0 |
| 1 | 0 | 0 | 0 | 0 |
| 0 | 1 | 0 | 0 | 0 |
| 0 | 1 | 0 | 0 | 0 |
| 1 | 1 | 0 | 0 | 0 |
| 1 | 1 | 0 | 0 | 0 |
| 1 | 1 | 0 | 0 | 0 |
| 1 | 1 | 0 | 0 | 0 |
| 1 | 1 | 0 | 0 | 0 |
| 1 | 1 | 0 | 0 | 0 |
| 0 | 1 | 0 | 0 | 0 |
| 1 | 0 | 0 | 0 | 0 |
| 0 | 1 | 0 | 0 | 0 |
| 1 | 0 | 0 | 0 | 0 |
| 1 | 1 | 0 | 0 | 0 |
| 1 | 1 | 0 | 0 | 1 |
| 0 | 1 | 0 | 0 | 0 |
| 1 | 1 | 0 | 0 | 0 |
| 0 | 1 | 0 | 0 | 0 |
| 0 | 1 | 0 | 0 | 0 |
| 0 | 1 | 0 | 0 | 0 |
| 1 | 1 | 0 | 0 | 0 |
| 0 | 1 | 0 | 0 | 0 |
| 0 | 1 | 0 | 0 | 0 |
| 0 | 1 | 0 | 0 | 0 |
| 1 | 1 | 0 | 0 | 0 |
| 1 | 1 | 0 | 0 | 0 |
| 1 | 1 | 0 | 0 | 0 |
| 0 | 1 | 0 | 0 | 0 |
| 1 | 1 | 0 | 0 | 0 |
| 0 | 0 | 0 | 0 | 0 |
| 0 | 0 | 0 | 0 | 0 |
| 1 | 1 | 0 | 0 | 0 |
| 0 | 1 | 0 | 0 | 0 |
| 1 | 1 | 0 | 0 | 0 |
| 1 | 1 | 0 | 0 | 0 |
| 0 | 0 | 0 | 0 | 0 |
| 3 | 1 | 0 | 0 | 0 |
| 1 | 1 | 0 | 0 | 0 |
| 0 | 1 | 0 | 0 | 0 |
| 1 | 0 | 0 | 0 | 0 |

|   |   |   |   |   |
|---|---|---|---|---|
| 0 | 0 | 0 | 0 | 0 |
| 0 | 0 | 0 | 0 | 0 |
| 0 | 1 | 0 | 0 | 0 |
| 0 | 1 | 0 | 0 | 0 |
| 0 | 1 | 0 | 0 | 0 |
| 1 | 0 | 0 | 1 | 0 |
| 1 | 0 | 0 | 0 | 0 |
| 0 | 1 | 0 | 0 | 0 |
| 0 | 1 | 0 | 0 | 0 |
| 0 | 1 | 0 | 0 | 0 |
| 1 | 1 | 0 | 0 | 0 |
| 1 | 1 | 0 | 0 | 0 |
| 0 | 1 | 0 | 0 | 0 |
| 0 | 1 | 0 | 0 | 0 |
| 1 | 1 | 0 | 0 | 0 |
| 1 | 1 | 0 | 0 | 0 |
| 1 | 1 | 0 | 0 | 0 |
| 0 | 1 | 0 | 0 | 0 |
| 0 | 1 | 0 | 0 | 0 |
| 1 | 1 | 0 | 0 | 0 |
| 1 | 1 | 0 | 0 | 0 |
| 0 | 1 | 0 | 0 | 0 |
| 0 | 1 | 0 | 0 | 0 |
| 1 | 1 | 0 | 0 | 0 |
| 0 | 1 | 0 | 0 | 0 |
| 0 | 1 | 0 | 0 | 0 |
| 1 | 1 | 0 | 0 | 0 |
| 0 | 1 | 0 | 0 | 0 |
| 0 | 1 | 0 | 0 | 0 |
| 1 | 1 | 0 | 0 | 0 |
| 1 | 1 | 0 | 0 | 0 |
| 1 | 0 | 0 | 0 | 0 |
| 0 | 1 | 0 | 0 | 0 |
| 1 | 0 | 0 | 0 | 0 |
| 0 | 1 | 0 | 0 | 0 |
| 0 | 0 | 0 | 0 | 0 |
| 1 | 1 | 0 | 0 | 0 |
| 3 | 0 | 0 | 0 | 0 |
| 1 | 0 | 0 | 0 | 0 |
| 3 | 1 | 0 | 0 | 0 |

|   |   |   |   |   |
|---|---|---|---|---|
| 1 | 0 | 0 | 0 | 0 |
| 1 | 1 | 0 | 0 | 0 |
| 0 | 0 | 0 | 0 | 0 |
| 0 | 1 | 0 | 0 | 0 |
| 1 | 1 | 0 | 0 | 0 |
| 0 | 0 | 0 | 0 | 0 |
| 1 | 1 | 0 | 0 | 0 |
| 1 | 1 | 0 | 0 | 0 |
| 0 | 1 | 0 | 0 | 0 |
| 1 | 1 | 0 | 0 | 0 |
| 0 | 1 | 0 | 0 | 0 |
| 1 | 1 | 0 | 0 | 0 |
| 0 | 1 | 0 | 0 | 0 |
| 0 | 1 | 0 | 0 | 0 |
| 1 | 0 | 0 | 0 | 0 |
| 0 | 0 | 0 | 0 | 0 |
| 1 | 1 | 0 | 0 | 0 |
| 1 | 1 | 0 | 0 | 0 |
| 0 | 1 | 0 | 0 | 0 |
| 1 | 1 | 0 | 0 | 0 |
| 0 | 0 | 0 | 0 | 0 |
| 1 | 1 | 0 | 0 | 0 |
| 3 | 1 | 0 | 0 | 0 |
| 0 | 1 | 0 | 0 | 0 |
| 0 | 1 | 0 | 0 | 0 |
| 0 | 1 | 0 | 0 | 0 |
| 0 | 1 | 0 | 0 | 0 |
| 0 | 1 | 0 | 0 | 0 |
| 1 | 1 | 0 | 0 | 0 |
| 1 | 1 | 0 | 0 | 0 |
| 0 | 1 | 0 | 0 | 0 |
| 0 | 1 | 0 | 0 | 0 |
| 1 | 0 | 0 | 0 | 0 |
| 1 | 1 | 0 | 0 | 0 |
| 1 | 0 | 0 | 0 | 0 |
| 1 | 0 | 0 | 0 | 0 |
| 1 | 1 | 0 | 0 | 0 |
| 1 | 1 | 0 | 0 | 0 |
| 0 | 1 | 0 | 0 | 0 |
| 1 | 0 | 0 | 0 | 0 |
| 1 | 1 | 0 | 0 | 0 |
| 0 | 1 | 0 | 0 | 0 |
| 1 | 0 | 0 | 0 | 0 |
| 1 | 1 | 0 | 0 | 0 |
| 0 | 1 | 0 | 0 | 0 |
| 0 | 1 | 0 | 0 | 0 |

|   |   |   |   |   |
|---|---|---|---|---|
| 0 | 0 | 0 | 0 | 0 |
| 0 | 1 | 0 | 0 | 0 |
| 0 | 1 | 0 | 0 | 0 |
| 0 | 1 | 0 | 0 | 0 |
| 1 | 0 | 0 | 0 | 1 |
| 1 | 1 | 0 | 0 | 0 |
| 1 | 1 | 0 | 0 | 0 |
| 1 | 1 | 0 | 0 | 0 |
| 1 | 1 | 0 | 0 | 0 |
| 0 | 1 | 0 | 0 | 0 |
| 3 | 0 | 0 | 0 | 1 |
| 0 | 1 | 0 | 0 | 0 |
| 0 | 1 | 0 | 0 | 0 |
| 0 | 1 | 0 | 0 | 0 |
| 3 | 1 | 0 | 0 | 0 |
| 1 | 0 | 0 | 0 | 0 |
| 1 | 1 | 0 | 0 | 0 |
| 0 | 1 | 0 | 0 | 0 |
| 0 | 1 | 0 | 0 | 0 |
| 1 | 0 | 0 | 0 | 1 |
| 1 | 1 | 0 | 0 | 0 |
| 0 | 0 | 0 | 0 | 0 |
| 0 | 1 | 0 | 0 | 0 |
| 0 | 1 | 0 | 0 | 0 |
| 0 | 1 | 0 | 0 | 0 |
| 0 | 0 | 0 | 0 | 0 |
| 1 | 1 | 0 | 0 | 0 |
| 1 | 0 | 0 | 0 | 0 |
| 1 | 0 | 0 | 0 | 0 |
| 0 | 1 | 0 | 0 | 0 |
| 1 | 0 | 0 | 0 | 0 |
| 1 | 1 | 0 | 0 | 0 |
| 0 | 1 | 0 | 0 | 0 |
| 0 | 0 | 0 | 0 | 0 |
| 0 | 0 | 0 | 0 | 0 |
| 0 | 0 | 0 | 0 | 0 |
| 0 | 1 | 0 | 0 | 0 |
| 0 | 0 | 0 | 0 | 0 |
| 1 | 1 | 0 | 0 | 0 |
| 0 | 1 | 0 | 0 | 0 |
| 1 | 1 | 0 | 0 | 0 |
| 0 | 1 | 0 | 0 | 0 |
| 1 | 1 | 0 | 0 | 0 |
| 1 | 1 | 0 | 0 | 0 |
| 1 | 1 | 0 | 0 | 0 |
| 0 | 1 | 0 | 0 | 0 |
| 1 | 1 | 0 | 0 | 0 |





|   |   |   |   |   |
|---|---|---|---|---|
| 0 | 1 | 0 | 0 | 0 |
| 0 | 1 | 0 | 0 | 0 |
| 0 | 1 | 0 | 0 | 0 |
| 1 | 1 | 0 | 0 | 0 |
| 1 | 1 | 0 | 0 | 0 |
| 1 | 1 | 0 | 0 | 0 |
| 1 | 1 | 0 | 0 | 0 |
| 1 | 0 | 0 | 0 | 1 |
| 0 | 0 | 0 | 0 | 0 |
| 0 | 1 | 0 | 0 | 0 |
| 1 | 0 | 0 | 0 | 0 |
| 1 | 1 | 0 | 0 | 0 |
| 1 | 1 | 0 | 0 | 0 |
| 0 | 1 | 0 | 0 | 0 |
| 0 | 0 | 0 | 0 | 0 |
| 0 | 1 | 0 | 0 | 0 |
| 0 | 1 | 0 | 0 | 0 |
| 0 | 0 | 0 | 0 | 0 |
| 0 | 1 | 0 | 0 | 0 |
| 1 | 1 | 0 | 0 | 0 |
| 0 | 0 | 0 | 0 | 0 |
| 0 | 1 | 0 | 0 | 0 |
| 0 | 1 | 0 | 0 | 0 |
| 1 | 1 | 0 | 0 | 0 |
| 0 | 0 | 0 | 0 | 0 |
| 0 | 1 | 0 | 0 | 0 |
| 1 | 1 | 0 | 0 | 0 |
| 1 | 1 | 0 | 0 | 0 |
| 0 | 0 | 0 | 0 | 0 |
| 1 | 1 | 0 | 0 | 0 |
| 1 | 1 | 0 | 0 | 0 |
| 0 | 1 | 0 | 0 | 0 |
| 1 | 0 | 0 | 1 | 0 |
| 0 | 1 | 0 | 0 | 0 |
| 1 | 0 | 0 | 0 | 1 |
| 1 | 1 | 0 | 0 | 0 |
| 0 | 1 | 0 | 0 | 0 |
| 1 | 0 | 0 | 0 | 0 |
| 1 | 0 | 0 | 1 | 0 |

|   |   |   |   |   |
|---|---|---|---|---|
| 1 | 1 | 0 | 0 | 0 |
| 0 | 0 | 0 | 0 | 0 |
| 1 | 0 | 0 | 0 | 0 |
| 0 | 1 | 0 | 0 | 0 |
| 0 | 1 | 0 | 0 | 0 |
| 1 | 0 | 0 | 0 | 0 |
| 0 | 1 | 0 | 0 | 0 |
| 0 | 1 | 0 | 0 | 0 |
| 1 | 1 | 0 | 0 | 0 |
| 1 | 1 | 0 | 0 | 0 |
| 0 | 1 | 0 | 0 | 0 |
| 1 | 1 | 0 | 0 | 0 |
| 0 | 0 | 0 | 0 | 0 |
| 1 | 1 | 0 | 0 | 0 |
| 0 | 1 | 0 | 0 | 0 |
| 0 | 1 | 0 | 0 | 0 |
| 1 | 1 | 0 | 0 | 0 |
| 0 | 0 | 0 | 0 | 0 |
| 1 | 0 | 0 | 0 | 1 |
| 0 | 1 | 0 | 0 | 0 |
| 1 | 1 | 0 | 0 | 0 |
| 0 | 1 | 0 | 0 | 0 |
| 3 | 0 | 0 | 0 | 1 |
| 0 | 1 | 0 | 0 | 0 |
| 1 | 0 | 0 | 0 | 0 |
| 0 | 0 | 0 | 0 | 0 |
| 1 | 1 | 0 | 0 | 0 |
| 0 | 1 | 0 | 0 | 0 |
| 1 | 1 | 0 | 0 | 0 |
| 1 | 1 | 0 | 0 | 0 |
| 1 | 1 | 0 | 0 | 0 |
| 0 | 0 | 0 | 0 | 0 |
| 0 | 1 | 0 | 0 | 0 |
| 1 | 1 | 0 | 0 | 0 |
| 1 | 1 | 0 | 0 | 0 |
| 1 | 1 | 0 | 0 | 0 |
| 1 | 0 | 0 | 0 | 0 |
| 1 | 1 | 0 | 0 | 0 |
| 0 | 1 | 0 | 0 | 0 |
| 0 | 1 | 0 | 0 | 0 |
| 0 | 1 | 0 | 0 | 0 |
| 0 | 1 | 0 | 0 | 0 |
| 1 | 1 | 0 | 0 | 0 |
| 1 | 1 | 0 | 0 | 0 |
| 0 | 0 | 0 | 0 | 0 |
| 1 | 1 | 0 | 0 | 0 |
| 1 | 1 | 0 | 0 | 0 |

|   |   |   |   |   |
|---|---|---|---|---|
| 0 | 1 | 0 | 0 | 0 |
| 1 | 1 | 0 | 0 | 0 |
| 1 | 1 | 0 | 0 | 0 |
| 1 | 1 | 0 | 0 | 0 |
| 0 | 1 | 0 | 0 | 0 |
| 0 | 1 | 0 | 0 | 0 |
| 0 | 0 | 0 | 0 | 0 |
| 1 | 1 | 0 | 0 | 0 |
| 1 | 1 | 0 | 0 | 0 |
| 1 | 1 | 0 | 0 | 0 |
| 3 | 0 | 0 | 0 | 1 |
| 0 | 0 | 0 | 0 | 0 |
| 0 | 1 | 0 | 0 | 0 |
| 1 | 0 | 0 | 0 | 0 |
| 0 | 1 | 0 | 0 | 0 |
| 1 | 0 | 0 | 0 | 0 |
| 0 | 1 | 0 | 0 | 0 |
| 1 | 1 | 0 | 0 | 0 |
| 0 | 0 | 0 | 0 | 0 |
| 0 | 1 | 0 | 0 | 0 |
| 0 | 0 | 0 | 0 | 0 |
| 0 | 0 | 0 | 0 | 0 |
| 1 | 1 | 0 | 0 | 0 |
| 0 | 0 | 0 | 0 | 0 |
| 1 | 1 | 0 | 0 | 0 |
| 1 | 1 | 0 | 0 | 0 |
| 0 | 1 | 0 | 0 | 0 |
| 1 | 1 | 0 | 0 | 0 |
| 1 | 1 | 0 | 0 | 0 |
| 0 | 1 | 0 | 0 | 0 |
| 1 | 1 | 0 | 0 | 0 |
| 0 | 1 | 0 | 1 | 0 |
| 1 | 0 | 0 | 0 | 0 |
| 0 | 0 | 0 | 0 | 0 |
| 0 | 1 | 0 | 0 | 0 |
| 0 | 1 | 0 | 0 | 0 |
| 1 | 1 | 0 | 0 | 0 |
| 1 | 1 | 0 | 0 | 0 |
| 1 | 1 | 0 | 0 | 0 |
| 0 | 1 | 0 | 0 | 0 |
| 0 | 1 | 0 | 0 | 0 |
| 0 | 1 | 0 | 0 | 0 |
| 0 | 0 | 0 | 0 | 0 |
| 0 | 0 | 0 | 0 | 0 |
| 1 | 1 | 0 | 0 | 0 |
| 1 | 0 | 0 | 0 | 0 |
| 0 | 1 | 0 | 0 | 0 |
| 1 | 0 | 0 | 0 | 0 |
| 0 | 1 | 0 | 0 | 0 |

|   |   |   |   |   |
|---|---|---|---|---|
| 1 | 1 | 0 | 0 | 0 |
| 0 | 1 | 0 | 0 | 0 |
| 1 | 1 | 0 | 0 | 0 |
| 0 | 0 | 0 | 0 | 0 |
| 1 | 1 | 0 | 0 | 0 |
| 1 | 1 | 0 | 0 | 0 |
| 0 | 1 | 0 | 0 | 0 |
| 1 | 0 | 0 | 0 | 1 |
| 0 | 1 | 0 | 0 | 0 |
| 0 | 1 | 0 | 0 | 0 |
| 1 | 1 | 0 | 0 | 0 |
| 0 | 1 | 0 | 0 | 0 |
| 1 | 1 | 0 | 0 | 0 |
| 0 | 1 | 0 | 0 | 0 |
| 1 | 1 | 0 | 0 | 0 |
| 1 | 0 | 0 | 0 | 1 |
| 0 | 1 | 0 | 0 | 0 |
| 0 | 1 | 0 | 0 | 0 |
| 0 | 1 | 0 | 0 | 0 |
| 1 | 1 | 0 | 0 | 0 |
| 1 | 1 | 0 | 0 | 0 |
| 1 | 1 | 0 | 0 | 0 |
| 1 | 1 | 0 | 0 | 0 |
| 1 | 1 | 0 | 0 | 0 |
| 1 | 1 | 0 | 0 | 0 |
| 1 | 0 | 0 | 0 | 1 |
| 0 | 1 | 0 | 0 | 0 |
| 0 | 1 | 0 | 0 | 0 |
| 1 | 0 | 0 | 0 | 1 |
| 0 | 1 | 0 | 0 | 0 |
| 0 | 1 | 0 | 0 | 0 |
| 0 | 1 | 0 | 0 | 0 |
| 3 | 0 | 0 | 0 | 0 |
| 1 | 0 | 0 | 0 | 0 |
| 0 | 1 | 0 | 0 | 0 |
| 0 | 1 | 0 | 0 | 0 |
| 1 | 1 | 0 | 0 | 0 |
| 1 | 1 | 0 | 0 | 0 |
| 0 | 1 | 0 | 0 | 0 |
| 1 | 1 | 0 | 0 | 0 |
| 0 | 1 | 0 | 0 | 0 |
| 1 | 1 | 0 | 0 | 0 |
| 0 | 1 | 0 | 0 | 0 |



|   |   |   |   |   |
|---|---|---|---|---|
| 0 | 1 | 0 | 0 | 0 |
| 1 | 0 | 0 | 0 | 1 |
| 0 | 1 | 0 | 0 | 0 |
| 0 | 1 | 0 | 0 | 0 |
| 0 | 1 | 0 | 0 | 0 |
| 1 | 0 | 0 | 0 | 1 |
| 1 | 1 | 0 | 0 | 0 |
| 1 | 1 | 0 | 0 | 0 |
| 1 | 1 | 0 | 0 | 0 |
| 1 | 0 | 0 | 0 | 1 |
| 0 | 1 | 0 | 0 | 0 |
| 1 | 1 | 0 | 0 | 0 |
| 0 | 1 | 0 | 0 | 0 |
| 1 | 0 | 0 | 0 | 0 |
| 0 | 1 | 0 | 0 | 0 |
| 1 | 1 | 0 | 0 | 0 |
| 1 | 1 | 0 | 0 | 0 |
| 1 | 1 | 0 | 0 | 0 |
| 0 | 1 | 0 | 0 | 0 |
| 1 | 1 | 0 | 0 | 0 |
| 1 | 0 | 0 | 0 | 1 |
| 0 | 1 | 0 | 0 | 0 |
| 1 | 1 | 0 | 0 | 0 |
| 0 | 1 | 0 | 0 | 0 |
| 1 | 1 | 0 | 0 | 0 |
| 0 | 1 | 0 | 0 | 0 |
| 0 | 1 | 0 | 0 | 0 |
| 1 | 1 | 0 | 0 | 0 |
| 0 | 1 | 0 | 0 | 0 |
| 1 | 0 | 0 | 0 | 1 |
| 1 | 1 | 0 | 0 | 0 |
| 0 | 1 | 0 | 0 | 0 |
| 1 | 1 | 0 | 0 | 0 |
| 1 | 0 | 0 | 0 | 0 |
| 1 | 1 | 0 | 0 | 0 |
| 1 | 1 | 0 | 0 | 0 |
| 1 | 1 | 0 | 0 | 0 |
| 0 | 0 | 0 | 0 | 0 |

|    |   |   |   |   |
|----|---|---|---|---|
| 1  | 1 | 0 | 0 | 0 |
| 0  | 1 | 0 | 0 | 0 |
| 1  | 1 | 0 | 0 | 0 |
| 0  | 1 | 0 | 0 | 0 |
| 0  | 1 | 0 | 0 | 0 |
| 1  | 1 | 0 | 0 | 0 |
| 0  | 0 | 0 | 0 | 0 |
| 0  | 1 | 0 | 0 | 0 |
| 1  | 1 | 0 | 0 | 0 |
| 1  | 1 | 0 | 0 | 0 |
| 0  | 0 | 0 | 0 | 0 |
| 0  | 1 | 0 | 0 | 0 |
| 1  | 1 | 0 | 0 | 0 |
| 0  | 1 | 0 | 0 | 0 |
| 99 | 1 | 0 | 0 | 0 |
| 0  | 1 | 0 | 0 | 0 |
| 1  | 1 | 0 | 0 | 0 |
| 1  | 0 | 0 | 0 | 0 |
| 1  | 0 | 0 | 0 | 0 |
| 0  | 1 | 0 | 0 | 0 |
| 0  | 1 | 0 | 0 | 0 |
| 1  | 1 | 0 | 0 | 0 |
| 0  | 0 | 0 | 0 | 0 |
| 1  | 0 | 0 | 0 | 0 |
| 0  | 0 | 0 | 0 | 0 |
| 1  | 1 | 0 | 0 | 0 |
| 0  | 1 | 0 | 0 | 0 |
| 1  | 1 | 0 | 0 | 0 |
| 1  | 1 | 0 | 0 | 0 |
| 0  | 1 | 0 | 0 | 0 |
| 1  | 1 | 0 | 0 | 0 |
| 0  | 1 | 0 | 0 | 0 |
| 0  | 1 | 0 | 0 | 0 |
| 0  | 1 | 0 | 0 | 0 |
| 1  | 1 | 0 | 0 | 0 |
| 1  | 1 | 0 | 0 | 0 |
| 0  | 1 | 0 | 0 | 0 |
| 0  | 1 | 0 | 0 | 0 |
| 1  | 1 | 0 | 0 | 0 |
| 1  | 1 | 0 | 0 | 0 |
| 0  | 1 | 0 | 0 | 0 |
| 0  | 1 | 0 | 0 | 0 |
| 1  | 1 | 0 | 0 | 0 |
| 1  | 1 | 0 | 0 | 0 |
| 0  | 1 | 0 | 0 | 0 |
| 0  | 1 | 0 | 0 | 0 |
| 0  | 1 | 0 | 0 | 0 |

|        |   |   |   |   |
|--------|---|---|---|---|
| 1      | 1 | 0 | 0 | 0 |
| 0      | 1 | 0 | 0 | 0 |
| 0      | 1 | 0 | 0 | 0 |
| 1      | 1 | 0 | 0 | 0 |
| 1      | 1 | 0 | 0 | 0 |
| 0      | 0 | 0 | 0 | 0 |
| 0      | 1 | 0 | 0 | 0 |
| 3      | 1 | 1 | 1 | 1 |
| 0      | 1 | 0 | 0 | 0 |
| 0      | 0 | 0 | 0 | 0 |
| 1      | 0 | 0 | 0 | 0 |
| 0      | 1 | 0 | 0 | 0 |
| 0      | 1 | 0 | 0 | 0 |
| 1      | 1 | 0 | 0 | 0 |
| 1      | 1 | 0 | 0 | 0 |
| 0      | 1 | 0 | 0 | 0 |
| 1      | 1 | 0 | 0 | 0 |
| 0      | 1 | 0 | 0 | 0 |
| 1      | 1 | 0 | 0 | 0 |
| 1      | 1 | 0 | 0 | 0 |
| #NULL! | 0 | 0 | 0 | 1 |
| 0      | 1 | 0 | 0 | 0 |
| 0      | 1 | 0 | 0 | 0 |
| 0      | 1 | 0 | 0 | 0 |
| 0      | 1 | 0 | 0 | 0 |
| 1      | 1 | 0 | 0 | 0 |
| 0      | 1 | 0 | 0 | 0 |
| 0      | 1 | 0 | 0 | 0 |
| 0      | 1 | 0 | 0 | 0 |
| 0      | 1 | 0 | 0 | 0 |
| 0      | 1 | 0 | 0 | 0 |
| 0      | 1 | 0 | 0 | 0 |
| 0      | 0 | 0 | 0 | 1 |
| 0      | 1 | 0 | 0 | 0 |
| 1      | 1 | 0 | 0 | 0 |
| 1      | 0 | 0 | 0 | 1 |
| 0      | 1 | 0 | 0 | 0 |
| 0      | 1 | 0 | 0 | 0 |
| 1      | 0 | 0 | 0 | 1 |
| 0      | 1 | 0 | 0 | 0 |
| 1      | 1 | 0 | 0 | 0 |
| 0      | 1 | 0 | 0 | 0 |
| 1      | 1 | 0 | 0 | 0 |
| 0      | 1 | 0 | 0 | 0 |
| 3      | 0 | 0 | 1 | 0 |
| 0      | 1 | 0 | 0 | 0 |
| 0      | 1 | 0 | 0 | 0 |
| 1      | 1 | 0 | 0 | 0 |
| 1      | 1 | 0 | 0 | 0 |
| 0      | 1 | 0 | 0 | 0 |



|   |   |   |   |   |
|---|---|---|---|---|
| 0 | 1 | 0 | 0 | 0 |
| 0 | 1 | 0 | 0 | 0 |
| 1 | 0 | 0 | 0 | 0 |
| 1 | 0 | 0 | 0 | 0 |
| 0 | 0 | 0 | 0 | 1 |
| 0 | 1 | 0 | 0 | 0 |
| 3 | 0 | 0 | 1 | 1 |
| 1 | 1 | 0 | 0 | 0 |
| 1 | 0 | 0 | 0 | 0 |
| 1 | 1 | 0 | 0 | 0 |
| 1 | 0 | 0 | 0 | 0 |
| 3 | 1 | 0 | 0 | 0 |
| 0 | 1 | 0 | 0 | 0 |
| 1 | 0 | 0 | 0 | 0 |
| 0 | 1 | 0 | 0 | 0 |
| 1 | 1 | 0 | 0 | 0 |
| 0 | 1 | 0 | 0 | 0 |
| 1 | 1 | 0 | 0 | 0 |
| 0 | 1 | 0 | 0 | 0 |
| 0 | 1 | 0 | 0 | 0 |
| 1 | 1 | 0 | 0 | 0 |
| 1 | 1 | 0 | 0 | 0 |
| 0 | 1 | 0 | 0 | 0 |
| 0 | 1 | 0 | 0 | 0 |
| 1 | 1 | 0 | 0 | 0 |
| 1 | 1 | 0 | 0 | 0 |
| 3 | 0 | 0 | 0 | 0 |
| 0 | 0 | 0 | 0 | 0 |
| 1 | 0 | 1 | 0 | 0 |
| 0 | 0 | 0 | 0 | 0 |
| 1 | 1 | 0 | 0 | 0 |
| 0 | 0 | 0 | 0 | 0 |
| 1 | 1 | 0 | 0 | 0 |
| 0 | 1 | 0 | 0 | 0 |
| 1 | 1 | 0 | 0 | 0 |
| 1 | 1 | 0 | 0 | 0 |
| 1 | 0 | 0 | 0 | 0 |
| 0 | 0 | 0 | 0 | 0 |
| 1 | 1 | 0 | 0 | 0 |
| 1 | 1 | 0 | 0 | 0 |
| 0 | 1 | 0 | 0 | 0 |
| 1 | 1 | 0 | 0 | 0 |
| 1 | 1 | 0 | 0 | 0 |
| 0 | 0 | 0 | 0 | 0 |
| 1 | 1 | 0 | 0 | 0 |
| 0 | 1 | 0 | 0 | 0 |
| 0 | 1 | 0 | 0 | 0 |
| 1 | 1 | 0 | 0 | 0 |
| 1 | 0 | 0 | 0 | 1 |
| 1 | 0 | 0 | 0 | 1 |
| 0 | 1 | 0 | 0 | 0 |
| 1 | 1 | 0 | 0 | 0 |

|   |   |   |   |   |
|---|---|---|---|---|
| 0 | 1 | 0 | 0 | 0 |
| 0 | 1 | 0 | 0 | 0 |
| 1 | 1 | 0 | 0 | 0 |
| 0 | 1 | 0 | 0 | 0 |
| 1 | 1 | 0 | 0 | 0 |
| 1 | 0 | 0 | 0 | 1 |
| 0 | 0 | 0 | 0 | 0 |
| 0 | 1 | 0 | 0 | 0 |
| 0 | 1 | 0 | 0 | 0 |
| 1 | 1 | 0 | 0 | 0 |
| 0 | 1 | 0 | 0 | 0 |
| 0 | 1 | 0 | 0 | 0 |
| 1 | 1 | 0 | 0 | 0 |
| 1 | 1 | 0 | 0 | 0 |
| 1 | 1 | 0 | 0 | 0 |
| 0 | 1 | 0 | 0 | 0 |
| 1 | 1 | 0 | 0 | 0 |
| 1 | 1 | 0 | 0 | 0 |
| 0 | 1 | 0 | 0 | 0 |
| 1 | 1 | 0 | 0 | 0 |

| sexorient_pre__5 | sexorient_pre__98 | sexorient_pre__99 | ethnicity_pre | race_pre__1 | race_pre__2 |
|------------------|-------------------|-------------------|---------------|-------------|-------------|
| 0                | 0                 | 0                 | 1             | 0           | 0           |
| 0                | 0                 | 0                 | 1             | 1           | 0           |
| 0                | 1                 | 0                 | 1             | 0           | 0           |
| 0                | 0                 | 0                 | 0             | 0           | 0           |
| 0                | 0                 | 0                 | 0             | 0           | 0           |
| 0                | 0                 | 0                 | 99            | 0           | 0           |
| 0                | 0                 | 0                 | 1             | 0           | 0           |
| 0                | 0                 | 0                 | 1             | 0           | 0           |
| 0                | 0                 | 0                 | 1             | 0           | 0           |
| 0                | 0                 | 0                 | 0             | 0           | 0           |
| 0                | 0                 | 0                 | 0             | 0           | 0           |
| 0                | 0                 | 0                 | 0             | 0           | 0           |
| 0                | 0                 | 0                 | 0             | 0           | 0           |
| 0                | 0                 | 0                 | 0             | 0           | 0           |
| 0                | 0                 | 0                 | 0             | 0           | 0           |
| 0                | 0                 | 0                 | 0             | 0           | 0           |
| 0                | 0                 | 0                 | 1             | 0           | 0           |
| 0                | 0                 | 0                 | 1             | 0           | 0           |
| 0                | 0                 | 0                 | 1             | 0           | 0           |
| 0                | 0                 | 0                 | 1             | 0           | 0           |
| 0                | 0                 | 0                 | 0             | 1           | 0           |
| 0                | 0                 | 0                 | 1             | 0           | 0           |
| 0                | 0                 | 0                 | 0             | 0           | 0           |
| 0                | 0                 | 0                 | 1             | 0           | 0           |
| 0                | 0                 | 0                 | 1             | 0           | 0           |
| 0                | 0                 | 0                 | 1             | 0           | 0           |
| 0                | 0                 | 0                 | 1             | 0           | 0           |
| 0                | 0                 | 0                 | 1             | 0           | 0           |
| 0                | 0                 | 0                 | 1             | 0           | 0           |
| 0                | 0                 | 0                 | 1             | 0           | 0           |
| 0                | 0                 | 0                 | 1             | 0           | 0           |
| 0                | 0                 | 0                 | 1             | 0           | 0           |
| 0                | 0                 | 0                 | 1             | 0           | 0           |
| 0                | 0                 | 0                 | 1             | 0           | 0           |
| 0                | 0                 | 0                 | 1             | 0           | 0           |
| 0                | 0                 | 0                 | 1             | 0           | 0           |
| 0                | 0                 | 0                 | 1             | 0           | 0           |
| 0                | 0                 | 0                 | 1             | 0           | 0           |
| 0                | 0                 | 0                 | 1             | 0           | 0           |
| 0                | 0                 | 0                 | 1             | 0           | 0           |
| 0                | 0                 | 0                 | 1             | 0           | 0           |
| 0                | 0                 | 0                 | 99            | 0           | 0           |
| 0                | 0                 | 0                 | 1             | 0           | 0           |
| 0                | 0                 | 0                 | 1             | 0           | 0           |
| 0                | 0                 | 0                 | 0             | 0           | 0           |
| 0                | 0                 | 0                 | 0             | 1           | 0           |
| 0                | 1                 | 0                 | 0             | 0           | 0           |
| 0                | 0                 | 0                 | 0             | 0           | 0           |
| 0                | 0                 | 0                 | 0             | 0           | 0           |
| 0                | 0                 | 0                 | 0             | 0           | 0           |

|   |   |   |    |   |   |
|---|---|---|----|---|---|
| 0 | 0 | 0 | 1  | 0 | 0 |
| 0 | 0 | 0 | 0  | 0 | 0 |
| 0 | 0 | 0 | 1  | 0 | 0 |
| 0 | 0 | 0 | 99 | 0 | 0 |
| 0 | 0 | 0 | 1  | 0 | 1 |
| 0 | 0 | 0 | 0  | 0 | 0 |
| 0 | 0 | 0 | 0  | 0 | 0 |
| 0 | 0 | 0 | 1  | 0 | 0 |
| 0 | 0 | 0 | 1  | 0 | 0 |
| 0 | 0 | 0 | 0  | 0 | 0 |
| 0 | 0 | 0 | 1  | 0 | 0 |
| 1 | 0 | 0 | 0  | 0 | 0 |
| 0 | 1 | 0 | 1  | 0 | 0 |
| 1 | 0 | 0 | 0  | 0 | 0 |
| 0 | 0 | 0 | 0  | 0 | 0 |
| 0 | 0 | 0 | 0  | 1 | 0 |
| 0 | 0 | 0 | 0  | 0 | 0 |
| 0 | 0 | 0 | 1  | 0 | 0 |
| 0 | 0 | 0 | 0  | 0 | 0 |
| 0 | 0 | 0 | 1  | 0 | 0 |
| 0 | 0 | 0 | 0  | 0 | 0 |
| 0 | 0 | 0 | 1  | 0 | 0 |
| 0 | 0 | 0 | 1  | 0 | 0 |
| 0 | 0 | 0 | 1  | 0 | 0 |
| 0 | 0 | 0 | 1  | 0 | 0 |
| 0 | 0 | 0 | 0  | 0 | 0 |
| 0 | 0 | 0 | 0  | 0 | 0 |
| 0 | 0 | 0 | 0  | 0 | 0 |
| 0 | 0 | 0 | 1  | 0 | 0 |
| 0 | 0 | 0 | 0  | 0 | 0 |
| 0 | 0 | 0 | 1  | 0 | 0 |
| 0 | 0 | 0 | 1  | 0 | 0 |
| 0 | 0 | 0 | 1  | 0 | 0 |
| 0 | 0 | 0 | 1  | 0 | 0 |
| 0 | 0 | 0 | 1  | 0 | 0 |
| 0 | 0 | 0 | 1  | 0 | 0 |
| 0 | 0 | 0 | 1  | 0 | 0 |
| 0 | 0 | 0 | 0  | 0 | 0 |
| 0 | 0 | 0 | 1  | 0 | 0 |
| 0 | 0 | 0 | 1  | 0 | 0 |
| 0 | 0 | 0 | 1  | 0 | 0 |
| 0 | 0 | 0 | 1  | 0 | 0 |
| 0 | 0 | 0 | 1  | 0 | 0 |
| 0 | 0 | 0 | 0  | 0 | 0 |
| 0 | 0 | 0 | 0  | 0 | 0 |
| 0 | 1 | 0 | 0  | 0 | 0 |
| 0 | 0 | 0 | 1  | 0 | 0 |

|   |   |   |    |   |   |
|---|---|---|----|---|---|
| 0 | 0 | 0 | 99 | 0 | 0 |
| 0 | 0 | 0 | 1  | 0 | 0 |
| 0 | 0 | 0 | 1  | 0 | 0 |
| 0 | 0 | 0 | 0  | 0 | 0 |
| 1 | 0 | 0 | 1  | 0 | 0 |
| 0 | 0 | 1 | 0  | 0 | 0 |
| 0 | 0 | 0 | 99 | 0 | 0 |
| 0 | 0 | 0 | 0  | 0 | 0 |
| 0 | 0 | 0 | 1  | 0 | 0 |
| 0 | 0 | 0 | 0  | 0 | 0 |
| 0 | 0 | 0 | 1  | 0 | 0 |
| 0 | 0 | 0 | 0  | 0 | 0 |
| 0 | 0 | 0 | 1  | 0 | 0 |
| 0 | 0 | 0 | 0  | 0 | 0 |
| 0 | 0 | 0 | 0  | 0 | 0 |
| 0 | 0 | 0 | 1  | 0 | 0 |
| 0 | 0 | 0 | 1  | 0 | 0 |
| 0 | 0 | 0 | 0  | 0 | 0 |
| 0 | 0 | 0 | 1  | 0 | 0 |
| 0 | 0 | 0 | 1  | 0 | 0 |
| 0 | 0 | 0 | 1  | 0 | 0 |
| 0 | 0 | 0 | 1  | 0 | 0 |
| 0 | 0 | 0 | 0  | 0 | 0 |
| 0 | 0 | 0 | 99 | 0 | 0 |
| 0 | 0 | 0 | 0  | 0 | 0 |
| 0 | 0 | 0 | 1  | 0 | 0 |
| 0 | 0 | 0 | 1  | 0 | 0 |
| 0 | 0 | 0 | 1  | 0 | 0 |
| 0 | 0 | 0 | 0  | 0 | 0 |
| 0 | 0 | 0 | 1  | 0 | 0 |
| 0 | 0 | 0 | 1  | 0 | 0 |
| 0 | 0 | 0 | 1  | 0 | 0 |
| 0 | 0 | 0 | 0  | 0 | 0 |
| 0 | 0 | 0 | 99 | 0 | 0 |
| 0 | 0 | 0 | 0  | 0 | 0 |
| 0 | 0 | 0 | 1  | 0 | 0 |
| 0 | 0 | 0 | 0  | 0 | 0 |
| 0 | 0 | 0 | 1  | 0 | 0 |
| 0 | 0 | 0 | 1  | 0 | 0 |
| 0 | 1 | 0 | 1  | 0 | 0 |
| 0 | 0 | 0 | 1  | 1 | 0 |
| 0 | 0 | 0 | 0  | 0 | 0 |
| 0 | 0 | 0 | 0  | 0 | 0 |
| 0 | 0 | 0 | 0  | 0 | 0 |
| 0 | 0 | 0 | 0  | 0 | 0 |
| 0 | 0 | 0 | 1  | 1 | 0 |
| 0 | 1 | 0 | 0  | 0 | 0 |
| 0 | 0 | 0 | 0  | 0 | 0 |
| 0 | 0 | 0 | 0  | 0 | 0 |
| 0 | 0 | 0 | 1  | 0 | 0 |

|   |   |   |   |   |   |
|---|---|---|---|---|---|
| 0 | 0 | 0 | 1 | 0 | 0 |
| 0 | 0 | 0 | 1 | 0 | 0 |
| 0 | 1 | 0 | 0 | 0 | 0 |
| 0 | 0 | 0 | 0 | 0 | 0 |
| 0 | 0 | 0 | 0 | 0 | 0 |
| 0 | 0 | 0 | 0 | 0 | 0 |
| 0 | 0 | 1 | 1 | 1 | 0 |
| 0 | 0 | 0 | 1 | 0 | 0 |
| 0 | 1 | 0 | 1 | 0 | 0 |
| 0 | 0 | 0 | 1 | 0 | 0 |
| 0 | 0 | 0 | 1 | 0 | 0 |
| 0 | 0 | 0 | 1 | 0 | 0 |
| 0 | 0 | 0 | 1 | 0 | 0 |
| 0 | 0 | 0 | 0 | 0 | 0 |
| 0 | 1 | 0 | 1 | 0 | 0 |
| 0 | 0 | 0 | 0 | 0 | 0 |
| 0 | 0 | 0 | 0 | 0 | 0 |
| 0 | 0 | 0 | 0 | 0 | 0 |
| 0 | 0 | 0 | 0 | 0 | 0 |
| 0 | 0 | 0 | 0 | 0 | 0 |
| 0 | 0 | 0 | 0 | 1 | 0 |
| 0 | 0 | 0 | 1 | 1 | 0 |
| 1 | 0 | 0 | 1 | 0 | 0 |
| 0 | 0 | 0 | 0 | 0 | 0 |
| 0 | 0 | 0 | 1 | 0 | 0 |
| 0 | 0 | 0 | 0 | 0 | 0 |
| 0 | 1 | 0 | 1 | 1 | 0 |
| 0 | 0 | 0 | 0 | 0 | 0 |
| 0 | 0 | 0 | 1 | 0 | 0 |
| 0 | 0 | 0 | 0 | 0 | 0 |
| 0 | 0 | 0 | 0 | 0 | 0 |
| 0 | 0 | 0 | 1 | 0 | 0 |
| 0 | 0 | 0 | 1 | 0 | 0 |
| 0 | 0 | 0 | 0 | 1 | 0 |
| 0 | 0 | 0 | 0 | 1 | 0 |
| 0 | 0 | 0 | 0 | 0 | 0 |
| 0 | 0 | 0 | 0 | 0 | 0 |
| 0 | 0 | 0 | 1 | 0 | 0 |
| 0 | 0 | 0 | 0 | 0 | 0 |
| 0 | 0 | 0 | 0 | 0 | 0 |
| 0 | 0 | 0 | 0 | 0 | 0 |
| 0 | 0 | 0 | 0 | 0 | 0 |
| 0 | 0 | 0 | 1 | 0 | 0 |
| 0 | 0 | 0 | 0 | 0 | 0 |
| 0 | 0 | 0 | 0 | 0 | 0 |



|   |   |   |   |    |   |
|---|---|---|---|----|---|
| 0 | 0 | 0 | 0 | 0  | 0 |
| 0 | 0 | 0 | 1 | 0  | 0 |
| 0 | 1 | 0 | 0 | 0  | 0 |
| 0 | 0 | 0 | 0 | 0  | 0 |
| 0 | 0 | 0 | 0 | 0  | 0 |
| 0 | 0 | 0 | 1 | 0  | 0 |
| 0 | 1 | 0 | 0 | 0  | 0 |
| 0 | 0 | 1 | 0 | 0  | 0 |
| 0 | 0 | 0 | 0 | 0  | 0 |
| 0 | 1 | 0 | 0 | 0  | 0 |
| 0 | 0 | 0 | 0 | 0  | 0 |
| 0 | 0 | 0 | 1 | 0  | 0 |
| 0 | 0 | 0 | 0 | 0  | 0 |
| 0 | 0 | 0 | 0 | 1  | 0 |
| 0 | 0 | 0 | 0 | 1  | 0 |
| 0 | 1 | 0 | 0 | 1  | 1 |
| 0 | 0 | 0 | 0 | 1  | 0 |
| 0 | 0 | 0 | 0 | 1  | 0 |
| 0 | 0 | 0 | 0 | 99 | 0 |
| 0 | 0 | 0 | 0 | 99 | 0 |
| 0 | 0 | 0 | 0 | 0  | 0 |
| 0 | 0 | 0 | 0 | 1  | 0 |
| 1 | 0 | 0 | 0 | 0  | 0 |
| 0 | 0 | 0 | 0 | 1  | 0 |
| 0 | 1 | 0 | 0 | 99 | 0 |
| 0 | 0 | 0 | 0 | 0  | 0 |
| 0 | 0 | 0 | 0 | 0  | 0 |
| 0 | 0 | 0 | 0 | 0  | 0 |
| 0 | 0 | 0 | 1 | 1  | 0 |
| 0 | 0 | 0 | 0 | 0  | 0 |
| 0 | 0 | 0 | 0 | 1  | 0 |
| 0 | 0 | 0 | 0 | 1  | 0 |
| 0 | 0 | 0 | 0 | 1  | 0 |
| 0 | 0 | 0 | 0 | 1  | 0 |
| 0 | 0 | 0 | 0 | 1  | 0 |
| 0 | 0 | 0 | 0 | 1  | 0 |
| 0 | 0 | 0 | 0 | 0  | 0 |
| 0 | 0 | 0 | 0 | 1  | 0 |
| 0 | 0 | 0 | 0 | 1  | 0 |
| 0 | 0 | 0 | 0 | 1  | 0 |
| 0 | 0 | 0 | 0 | 1  | 0 |
| 0 | 0 | 0 | 0 | 1  | 0 |
| 0 | 0 | 0 | 0 | 1  | 1 |
| 0 | 0 | 0 | 0 | 0  | 1 |
| 1 | 0 | 0 | 0 | 1  | 0 |



|   |   |   |    |   |   |
|---|---|---|----|---|---|
| 0 | 0 | 0 | 1  | 0 | 0 |
| 0 | 0 | 0 | 99 | 0 | 0 |
| 0 | 0 | 1 | 0  | 0 | 0 |
| 0 | 0 | 0 | 99 | 0 | 0 |
| 0 | 0 | 0 | 0  | 0 | 0 |
| 0 | 0 | 0 | 1  | 1 | 0 |
| 0 | 0 | 0 | 0  | 0 | 0 |
| 0 | 0 | 0 | 0  | 0 | 0 |
| 0 | 0 | 0 | 1  | 0 | 0 |
| 0 | 0 | 0 | 1  | 0 | 0 |
| 0 | 0 | 0 | 0  | 0 | 0 |
| 0 | 0 | 0 | 1  | 0 | 0 |
| 0 | 0 | 0 | 1  | 0 | 0 |
| 0 | 0 | 0 | 0  | 0 | 0 |
| 0 | 0 | 0 | 0  | 0 | 0 |
| 0 | 0 | 0 | 1  | 0 | 0 |
| 0 | 0 | 0 | 1  | 0 | 0 |
| 0 | 0 | 0 | 1  | 0 | 0 |
| 0 | 0 | 0 | 0  | 0 | 0 |
| 0 | 0 | 1 | 0  | 0 | 0 |
| 0 | 0 | 0 | 0  | 0 | 0 |
| 0 | 0 | 0 | 1  | 0 | 0 |
| 0 | 0 | 0 | 1  | 0 | 0 |
| 0 | 0 | 0 | 0  | 0 | 0 |
| 0 | 0 | 0 | 1  | 0 | 0 |
| 0 | 0 | 0 | 1  | 0 | 0 |
| 0 | 0 | 0 | 0  | 0 | 0 |
| 0 | 0 | 0 | 1  | 0 | 0 |
| 0 | 0 | 0 | 0  | 0 | 0 |
| 0 | 0 | 0 | 1  | 0 | 0 |
| 0 | 0 | 0 | 1  | 0 | 0 |
| 0 | 0 | 0 | 1  | 0 | 0 |
| 0 | 0 | 0 | 1  | 0 | 0 |
| 0 | 0 | 0 | 1  | 0 | 0 |
| 0 | 0 | 0 | 1  | 0 | 0 |
| 0 | 0 | 0 | 0  | 0 | 0 |
| 0 | 0 | 0 | 1  | 0 | 0 |
| 0 | 0 | 0 | 1  | 0 | 0 |
| 1 | 0 | 0 | 1  | 0 | 0 |
| 0 | 0 | 0 | 1  | 0 | 0 |

|   |   |   |    |   |   |
|---|---|---|----|---|---|
| 0 | 0 | 0 | 1  | 0 | 0 |
| 0 | 0 | 0 | 1  | 0 | 0 |
| 0 | 0 | 0 | 1  | 0 | 0 |
| 0 | 0 | 0 | 0  | 0 | 0 |
| 0 | 0 | 0 | 1  | 0 | 0 |
| 0 | 0 | 0 | 99 | 0 | 0 |
| 0 | 0 | 0 | 1  | 0 | 0 |
| 0 | 0 | 0 | 0  | 0 | 0 |
| 0 | 0 | 0 | 0  | 0 | 0 |
| 0 | 0 | 0 | 1  | 0 | 0 |
| 0 | 0 | 0 | 0  | 0 | 0 |
| 0 | 0 | 0 | 1  | 0 | 0 |
| 0 | 0 | 0 | 0  | 1 | 1 |
| 1 | 0 | 0 | 1  | 0 | 0 |
| 0 | 0 | 0 | 1  | 0 | 0 |
| 0 | 0 | 0 | 1  | 0 | 0 |
| 0 | 0 | 0 | 1  | 0 | 1 |
| 0 | 0 | 0 | 1  | 0 | 0 |
| 0 | 0 | 0 | 1  | 0 | 0 |
| 0 | 0 | 0 | 1  | 0 | 0 |
| 1 | 0 | 0 | 1  | 0 | 0 |
| 0 | 0 | 0 | 0  | 0 | 0 |
| 0 | 0 | 0 | 0  | 0 | 0 |
| 0 | 0 | 0 | 1  | 0 | 0 |
| 0 | 0 | 0 | 0  | 0 | 0 |
| 0 | 0 | 0 | 0  | 0 | 0 |
| 0 | 0 | 0 | 0  | 0 | 0 |
| 0 | 0 | 0 | 99 | 0 | 0 |
| 0 | 0 | 0 | 1  | 0 | 0 |
| 0 | 0 | 0 | 0  | 0 | 0 |
| 0 | 0 | 0 | 0  | 0 | 0 |
| 0 | 0 | 0 | 0  | 0 | 0 |
| 0 | 0 | 0 | 1  | 0 | 0 |
| 0 | 0 | 0 | 0  | 0 | 0 |
| 0 | 0 | 0 | 0  | 0 | 0 |
| 0 | 0 | 0 | 1  | 0 | 0 |
| 0 | 0 | 0 | 0  | 0 | 0 |
| 0 | 1 | 0 | 1  | 0 | 0 |
| 0 | 0 | 0 | 0  | 0 | 0 |
| 0 | 0 | 0 | 0  | 0 | 0 |
| 0 | 0 | 0 | 1  | 0 | 0 |
| 0 | 0 | 0 | 0  | 0 | 0 |
| 0 | 0 | 0 | 0  | 0 | 0 |
| 0 | 0 | 0 | 1  | 0 | 0 |
| 0 | 0 | 0 | 0  | 0 | 0 |
| 0 | 0 | 0 | 1  | 0 | 0 |
| 0 | 0 | 0 | 0  | 1 | 0 |
| 0 | 0 | 0 | 0  | 0 | 0 |
| 0 | 0 | 0 | 0  | 0 | 0 |
| 0 | 0 | 0 | 1  | 0 | 0 |

|   |   |   |   |    |   |
|---|---|---|---|----|---|
| 0 | 0 | 0 | 0 | 0  | 0 |
| 0 | 0 | 0 | 1 | 0  | 0 |
| 0 | 0 | 0 | 1 | 0  | 0 |
| 0 | 0 | 0 | 0 | 0  | 0 |
| 0 | 1 | 0 | 0 | 0  | 0 |
| 0 | 0 | 0 | 0 | 0  | 0 |
| 0 | 0 | 0 | 0 | 0  | 0 |
| 0 | 0 | 0 | 0 | 99 | 0 |
| 0 | 0 | 0 | 0 | 0  | 0 |
| 0 | 0 | 0 | 0 | 1  | 0 |
| 0 | 0 | 0 | 0 | 0  | 0 |
| 0 | 0 | 0 | 0 | 0  | 0 |
| 0 | 0 | 0 | 0 | 0  | 0 |
| 0 | 0 | 0 | 0 | 1  | 0 |
| 0 | 0 | 0 | 0 | 1  | 0 |
| 0 | 0 | 0 | 0 | 0  | 0 |
| 0 | 0 | 0 | 0 | 0  | 0 |
| 0 | 0 | 0 | 0 | 0  | 0 |
| 1 | 0 | 0 | 0 | 0  | 0 |
| 0 | 0 | 0 | 0 | 1  | 0 |
| 0 | 1 | 0 | 0 | 0  | 0 |
| 0 | 0 | 0 | 0 | 1  | 0 |
| 0 | 0 | 0 | 0 | 0  | 0 |
| 0 | 0 | 0 | 0 | 0  | 0 |
| 0 | 0 | 0 | 0 | 1  | 0 |
| 0 | 0 | 0 | 0 | 99 | 1 |
| 0 | 1 | 0 | 0 | 1  | 0 |
| 0 | 0 | 0 | 0 | 0  | 0 |
| 0 | 0 | 0 | 0 | 1  | 0 |
| 0 | 1 | 0 | 0 | 0  | 0 |
| 0 | 0 | 1 | 0 | 1  | 0 |
| 0 | 0 | 0 | 1 | 1  | 0 |
| 0 | 0 | 0 | 0 | 1  | 0 |
| 0 | 0 | 0 | 0 | 1  | 0 |
| 0 | 0 | 0 | 0 | 1  | 0 |
| 0 | 0 | 0 | 0 | 0  | 0 |
| 0 | 0 | 0 | 0 | 1  | 0 |
| 0 | 0 | 0 | 0 | 1  | 0 |
| 0 | 0 | 0 | 0 | 0  | 1 |
| 0 | 0 | 0 | 0 | 1  | 0 |
| 0 | 0 | 0 | 0 | 1  | 0 |
| 0 | 0 | 0 | 0 | 1  | 0 |
| 0 | 0 | 0 | 0 | 0  | 0 |
| 0 | 0 | 0 | 1 | 1  | 0 |
| 0 | 0 | 0 | 0 | 1  | 0 |
| 0 | 0 | 0 | 0 | 0  | 0 |
| 0 | 0 | 0 | 0 | 1  | 0 |
| 0 | 0 | 0 | 0 | 1  | 0 |
| 0 | 0 | 0 | 0 | 0  | 1 |
| 0 | 0 | 0 | 0 | 1  | 1 |
| 0 | 0 | 0 | 0 | 1  | 0 |

|   |   |   |   |   |   |
|---|---|---|---|---|---|
| 0 | 0 | 0 | 1 | 0 | 0 |
| 0 | 0 | 0 | 0 | 0 | 0 |
| 0 | 0 | 0 | 1 | 0 | 0 |
| 0 | 1 | 0 | 1 | 0 | 0 |
| 0 | 0 | 0 | 1 | 0 | 0 |
| 0 | 0 | 0 | 1 | 0 | 0 |
| 0 | 0 | 0 | 0 | 1 | 0 |
| 0 | 0 | 0 | 1 | 0 | 0 |
| 0 | 0 | 0 | 0 | 0 | 0 |
| 0 | 0 | 0 | 1 | 0 | 0 |
| 0 | 0 | 0 | 0 | 0 | 0 |
| 0 | 0 | 0 | 1 | 0 | 0 |
| 0 | 0 | 0 | 0 | 1 | 0 |
| 0 | 0 | 0 | 1 | 0 | 0 |
| 0 | 0 | 0 | 1 | 0 | 0 |
| 0 | 0 | 0 | 0 | 0 | 0 |
| 0 | 0 | 0 | 1 | 0 | 0 |
| 0 | 0 | 0 | 0 | 0 | 0 |
| 0 | 0 | 0 | 1 | 0 | 0 |
| 0 | 0 | 0 | 0 | 0 | 0 |
| 0 | 0 | 0 | 1 | 0 | 0 |
| 0 | 0 | 0 | 0 | 1 | 0 |
| 0 | 0 | 0 | 1 | 0 | 0 |
| 0 | 0 | 0 | 1 | 1 | 0 |
| 0 | 1 | 0 | 0 | 1 | 0 |
| 0 | 0 | 0 | 1 | 0 | 0 |
| 0 | 0 | 0 | 1 | 1 | 0 |
| 0 | 0 | 0 | 1 | 0 | 0 |
| 0 | 0 | 0 | 1 | 0 | 0 |
| 0 | 0 | 0 | 1 | 0 | 0 |
| 0 | 0 | 0 | 1 | 1 | 0 |
| 0 | 0 | 0 | 1 | 0 | 0 |
| 0 | 0 | 0 | 1 | 0 | 0 |
| 0 | 0 | 0 | 0 | 0 | 0 |
| 0 | 0 | 0 | 1 | 0 | 0 |
| 0 | 0 | 0 | 1 | 0 | 0 |
| 0 | 0 | 0 | 1 | 0 | 0 |
| 0 | 0 | 0 | 1 | 0 | 0 |
| 0 | 0 | 0 | 1 | 0 | 0 |
| 0 | 0 | 0 | 1 | 0 | 0 |
| 0 | 0 | 0 | 0 | 0 | 0 |
| 0 | 0 | 0 | 1 | 1 | 0 |
| 0 | 0 | 0 | 1 | 0 | 0 |
| 0 | 0 | 0 | 1 | 0 | 0 |
| 0 | 0 | 0 | 0 | 1 | 0 |
| 0 | 0 | 0 | 0 | 0 | 0 |
| 1 | 0 | 0 | 0 | 1 | 0 |
| 0 | 0 | 0 | 1 | 0 | 0 |
| 0 | 0 | 0 | 1 | 0 | 0 |

|   |   |   |    |   |   |
|---|---|---|----|---|---|
| 0 | 1 | 0 | 1  | 0 | 0 |
| 1 | 0 | 0 | 1  | 0 | 0 |
| 0 | 0 | 0 | 1  | 0 | 0 |
| 0 | 1 | 0 | 99 | 0 | 0 |
| 0 | 0 | 0 | 0  | 0 | 0 |
| 0 | 0 | 0 | 0  | 0 | 0 |
| 0 | 0 | 0 | 99 | 0 | 0 |
| 0 | 0 | 0 | 1  | 0 | 0 |
| 0 | 0 | 0 | 0  | 0 | 0 |
| 0 | 0 | 0 | 0  | 0 | 0 |
| 0 | 1 | 0 | 0  | 0 | 0 |
| 0 | 0 | 0 | 0  | 0 | 0 |
| 0 | 0 | 0 | 1  | 0 | 0 |
| 0 | 0 | 0 | 0  | 0 | 0 |
| 0 | 0 | 0 | 1  | 0 | 0 |
| 0 | 0 | 0 | 1  | 0 | 0 |
| 0 | 0 | 0 | 1  | 0 | 0 |
| 0 | 0 | 0 | 1  | 0 | 0 |
| 0 | 0 | 0 | 1  | 0 | 0 |
| 0 | 0 | 0 | 1  | 0 | 0 |
| 0 | 0 | 0 | 1  | 0 | 0 |
| 0 | 0 | 0 | 1  | 0 | 0 |
| 0 | 0 | 0 | 1  | 0 | 0 |
| 0 | 0 | 0 | 1  | 1 | 0 |
| 0 | 0 | 1 | 1  | 0 | 0 |
| 0 | 0 | 0 | 99 | 0 | 0 |
| 0 | 0 | 0 | 0  | 0 | 0 |
| 0 | 0 | 0 | 99 | 0 | 0 |
| 0 | 0 | 0 | 1  | 0 | 0 |
| 0 | 0 | 0 | 0  | 0 | 0 |
| 0 | 0 | 0 | 0  | 0 | 0 |
| 0 | 0 | 0 | 1  | 1 | 0 |
| 0 | 0 | 0 | 0  | 0 | 0 |
| 0 | 0 | 0 | 0  | 0 | 0 |
| 0 | 1 | 0 | 1  | 1 | 0 |
| 0 | 0 | 1 | 1  | 0 | 0 |
| 0 | 0 | 0 | 1  | 0 | 0 |
| 0 | 0 | 0 | 1  | 0 | 0 |
| 0 | 0 | 0 | 1  | 0 | 0 |
| 0 | 0 | 0 | 1  | 0 | 0 |
| 0 | 0 | 0 | 0  | 1 | 0 |
| 0 | 0 | 0 | 1  | 0 | 0 |
| 0 | 0 | 0 | 0  | 0 | 0 |
| 0 | 0 | 0 | 1  | 0 | 0 |
| 0 | 0 | 0 | 0  | 0 | 0 |
| 0 | 0 | 0 | 0  | 0 | 0 |
| 0 | 0 | 0 | 1  | 0 | 0 |
| 0 | 0 | 0 | 1  | 0 | 0 |

|   |   |   |   |   |   |
|---|---|---|---|---|---|
| 0 | 0 | 0 | 1 | 0 | 0 |
| 0 | 0 | 0 | 1 | 0 | 0 |
| 0 | 0 | 0 | 1 | 0 | 0 |
| 0 | 0 | 0 | 0 | 0 | 0 |
| 0 | 0 | 0 | 0 | 0 | 0 |
| 0 | 1 | 0 | 0 | 0 | 0 |
| 0 | 0 | 0 | 0 | 0 | 0 |
| 0 | 0 | 0 | 1 | 0 | 0 |
| 0 | 0 | 0 | 1 | 0 | 0 |
| 0 | 1 | 0 | 0 | 0 | 0 |
| 0 | 0 | 0 | 1 | 0 | 0 |
| 0 | 0 | 0 | 1 | 0 | 0 |
| 0 | 0 | 0 | 0 | 0 | 0 |
| 0 | 0 | 0 | 0 | 0 | 0 |
| 0 | 0 | 0 | 1 | 0 | 0 |
| 0 | 0 | 0 | 1 | 0 | 0 |
| 0 | 0 | 0 | 1 | 0 | 0 |
| 0 | 0 | 0 | 0 | 0 | 0 |
| 0 | 0 | 0 | 1 | 0 | 0 |
| 0 | 0 | 0 | 1 | 0 | 0 |
| 0 | 0 | 0 | 0 | 0 | 0 |
| 0 | 0 | 0 | 1 | 0 | 0 |
| 0 | 1 | 0 | 1 | 0 | 0 |
| 0 | 0 | 0 | 0 | 0 | 0 |
| 0 | 0 | 0 | 1 | 0 | 0 |
| 0 | 0 | 0 | 1 | 1 | 0 |
| 0 | 0 | 0 | 1 | 0 | 0 |
| 0 | 0 | 0 | 1 | 1 | 0 |
| 0 | 0 | 0 | 0 | 0 | 0 |
| 0 | 0 | 0 | 1 | 0 | 0 |
| 0 | 0 | 0 | 1 | 0 | 0 |
| 0 | 0 | 0 | 0 | 0 | 0 |
| 0 | 0 | 0 | 0 | 0 | 0 |
| 0 | 0 | 0 | 1 | 0 | 0 |
| 0 | 0 | 0 | 1 | 0 | 0 |
| 0 | 0 | 0 | 1 | 0 | 0 |
| 0 | 0 | 0 | 0 | 0 | 0 |
| 0 | 0 | 0 | 1 | 0 | 0 |
| 0 | 0 | 0 | 0 | 0 | 0 |
| 0 | 0 | 0 | 1 | 0 | 0 |
| 0 | 1 | 0 | 1 | 0 | 0 |
| 0 | 0 | 0 | 1 | 0 | 0 |
| 0 | 0 | 0 | 1 | 0 | 0 |
| 0 | 0 | 0 | 0 | 0 | 0 |
| 0 | 0 | 0 | 1 | 0 | 0 |
| 0 | 0 | 0 | 0 | 0 | 0 |
| 0 | 0 | 0 | 1 | 0 | 0 |
| 0 | 1 | 0 | 1 | 0 | 0 |
| 0 | 0 | 0 | 1 | 0 | 0 |
| 0 | 0 | 0 | 1 | 0 | 0 |
| 0 | 0 | 0 | 1 | 0 | 0 |

|   |   |   |    |   |   |
|---|---|---|----|---|---|
| 0 | 0 | 0 | 1  | 0 | 0 |
| 0 | 0 | 0 | 0  | 0 | 0 |
| 0 | 0 | 0 | 1  | 0 | 0 |
| 0 | 0 | 0 | 1  | 0 | 0 |
| 0 | 0 | 0 | 1  | 1 | 0 |
| 0 | 0 | 0 | 1  | 0 | 0 |
| 0 | 0 | 0 | 1  | 0 | 0 |
| 0 | 0 | 0 | 1  | 0 | 0 |
| 0 | 0 | 0 | 1  | 0 | 0 |
| 0 | 0 | 0 | 1  | 0 | 0 |
| 0 | 0 | 0 | 0  | 0 | 0 |
| 0 | 1 | 0 | 0  | 0 | 0 |
| 0 | 0 | 0 | 1  | 0 | 0 |
| 0 | 0 | 0 | 0  | 0 | 0 |
| 0 | 0 | 0 | 1  | 0 | 0 |
| 0 | 1 | 0 | 0  | 0 | 0 |
| 0 | 0 | 0 | 99 | 0 | 0 |
| 0 | 0 | 0 | 0  | 0 | 0 |
| 0 | 0 | 0 | 0  | 0 | 0 |
| 0 | 0 | 0 | 0  | 0 | 0 |
| 0 | 0 | 0 | 0  | 0 | 1 |
| 0 | 0 | 0 | 1  | 0 | 0 |
| 0 | 0 | 0 | 1  | 0 | 0 |
| 0 | 0 | 0 | 0  | 0 | 0 |
| 0 | 0 | 0 | 1  | 1 | 0 |
| 0 | 0 | 0 | 1  | 0 | 0 |
| 0 | 0 | 1 | 0  | 0 | 0 |
| 0 | 0 | 0 | 1  | 0 | 0 |
| 0 | 0 | 0 | 1  | 0 | 0 |
| 0 | 0 | 0 | 0  | 0 | 0 |
| 0 | 0 | 0 | 1  | 0 | 0 |
| 0 | 0 | 0 | 0  | 0 | 0 |
| 0 | 0 | 0 | 1  | 0 | 0 |
| 0 | 0 | 0 | 99 | 0 | 0 |
| 0 | 0 | 0 | 1  | 0 | 0 |
| 0 | 1 | 0 | 1  | 1 | 0 |
| 0 | 1 | 0 | 0  | 1 | 0 |
| 0 | 0 | 0 | 1  | 1 | 0 |
| 0 | 0 | 0 | 0  | 0 | 0 |
| 0 | 0 | 1 | 1  | 0 | 0 |
| 0 | 0 | 0 | 1  | 0 | 0 |
| 0 | 0 | 0 | 0  | 0 | 0 |
| 0 | 0 | 0 | 0  | 0 | 0 |
| 0 | 0 | 0 | 1  | 0 | 0 |
| 0 | 0 | 0 | 0  | 0 | 0 |
| 0 | 0 | 0 | 1  | 0 | 0 |
| 0 | 0 | 0 | 0  | 0 | 0 |
| 0 | 0 | 0 | 1  | 0 | 0 |
| 0 | 1 | 0 | 1  | 0 | 0 |
| 0 | 0 | 0 | 1  | 0 | 0 |

|   |   |   |    |   |   |
|---|---|---|----|---|---|
| 0 | 1 | 0 | 1  | 0 | 0 |
| 0 | 0 | 0 | 1  | 0 | 0 |
| 0 | 0 | 0 | 1  | 0 | 0 |
| 0 | 1 | 0 | 1  | 0 | 0 |
| 0 | 0 | 0 | 0  | 0 | 0 |
| 0 | 1 | 0 | 0  | 0 | 0 |
| 0 | 0 | 0 | 1  | 0 | 0 |
| 0 | 0 | 0 | 0  | 0 | 0 |
| 0 | 0 | 0 | 0  | 0 | 0 |
| 0 | 0 | 0 | 1  | 0 | 0 |
| 0 | 0 | 0 | 1  | 0 | 0 |
| 0 | 0 | 0 | 0  | 0 | 0 |
| 0 | 0 | 0 | 0  | 1 | 0 |
| 0 | 0 | 0 | 0  | 0 | 0 |
| 0 | 0 | 0 | 0  | 1 | 0 |
| 0 | 0 | 0 | 0  | 0 | 0 |
| 0 | 0 | 0 | 1  | 0 | 0 |
| 0 | 0 | 0 | 0  | 1 | 0 |
| 0 | 0 | 0 | 1  | 0 | 0 |
| 0 | 0 | 0 | 0  | 0 | 0 |
| 0 | 0 | 0 | 1  | 0 | 0 |
| 0 | 0 | 0 | 1  | 0 | 0 |
| 0 | 0 | 0 | 1  | 0 | 0 |
| 0 | 0 | 0 | 1  | 0 | 0 |
| 0 | 0 | 0 | 1  | 0 | 0 |
| 0 | 0 | 0 | 1  | 0 | 0 |
| 0 | 0 | 0 | 1  | 0 | 0 |
| 0 | 0 | 0 | 1  | 0 | 0 |
| 0 | 0 | 0 | 1  | 0 | 0 |
| 0 | 0 | 0 | 1  | 0 | 0 |
| 0 | 0 | 0 | 1  | 0 | 0 |
| 0 | 0 | 0 | 0  | 0 | 0 |
| 0 | 0 | 0 | 1  | 1 | 0 |
| 0 | 0 | 0 | 0  | 0 | 0 |
| 0 | 0 | 0 | 1  | 1 | 0 |
| 0 | 0 | 0 | 1  | 0 | 0 |
| 0 | 0 | 0 | 0  | 0 | 0 |
| 0 | 0 | 0 | 1  | 0 | 0 |
| 0 | 0 | 0 | 1  | 0 | 0 |
| 0 | 0 | 0 | 1  | 0 | 0 |
| 0 | 0 | 0 | 0  | 0 | 0 |
| 0 | 0 | 0 | 0  | 0 | 0 |
| 0 | 0 | 0 | 1  | 0 | 0 |
| 1 | 0 | 0 | 1  | 0 | 0 |
| 0 | 0 | 0 | 99 | 0 | 0 |
| 0 | 0 | 0 | 1  | 0 | 0 |
| 0 | 0 | 0 | 0  | 0 | 0 |
| 0 | 0 | 0 | 0  | 0 | 0 |
| 0 | 0 | 0 | 1  | 0 | 0 |
| 0 | 0 | 0 | 1  | 0 | 0 |
| 0 | 0 | 0 | 1  | 0 | 0 |
| 0 | 0 | 0 | 0  | 0 | 0 |



|   |   |   |    |   |   |
|---|---|---|----|---|---|
| 0 | 0 | 0 | 1  | 0 | 0 |
| 0 | 0 | 0 | 1  | 0 | 0 |
| 0 | 0 | 0 | 1  | 0 | 0 |
| 0 | 0 | 0 | 1  | 0 | 0 |
| 0 | 0 | 0 | 0  | 0 | 0 |
| 0 | 0 | 0 | 1  | 1 | 0 |
| 1 | 0 | 0 | 0  | 1 | 0 |
| 0 | 0 | 0 | 0  | 0 | 0 |
| 0 | 0 | 0 | 1  | 0 | 0 |
| 0 | 0 | 0 | 0  | 0 | 0 |
| 0 | 0 | 0 | 0  | 0 | 0 |
| 0 | 0 | 0 | 1  | 0 | 0 |
| 0 | 0 | 0 | 1  | 0 | 0 |
| 0 | 0 | 0 | 1  | 1 | 0 |
| 0 | 0 | 0 | 1  | 0 | 0 |
| 0 | 0 | 0 | 0  | 0 | 0 |
| 0 | 0 | 0 | 1  | 0 | 0 |
| 0 | 1 | 0 | 0  | 1 | 0 |
| 0 | 0 | 0 | 0  | 0 | 0 |
| 0 | 0 | 0 | 1  | 0 | 0 |
| 0 | 0 | 0 | 1  | 0 | 0 |
| 0 | 0 | 0 | 1  | 0 | 0 |
| 0 | 0 | 0 | 0  | 0 | 0 |
| 0 | 0 | 0 | 0  | 0 | 0 |
| 0 | 0 | 0 | 0  | 1 | 0 |
| 0 | 0 | 0 | 1  | 0 | 1 |
| 0 | 0 | 0 | 0  | 0 | 0 |
| 0 | 0 | 0 | 1  | 0 | 0 |
| 1 | 0 | 0 | 1  | 0 | 0 |
| 0 | 0 | 0 | 1  | 0 | 0 |
| 0 | 0 | 0 | 1  | 0 | 0 |
| 0 | 0 | 0 | 0  | 0 | 0 |
| 0 | 0 | 0 | 1  | 0 | 0 |
| 0 | 0 | 0 | 1  | 0 | 0 |
| 0 | 0 | 0 | 0  | 0 | 0 |
| 0 | 0 | 0 | 1  | 0 | 0 |
| 0 | 0 | 0 | 0  | 0 | 0 |
| 0 | 1 | 0 | 1  | 0 | 0 |
| 0 | 0 | 0 | 0  | 0 | 0 |
| 0 | 0 | 0 | 99 | 0 | 0 |
| 0 | 0 | 0 | 1  | 0 | 0 |
| 0 | 0 | 0 | 99 | 0 | 0 |
| 0 | 0 | 0 | 0  | 0 | 0 |
| 0 | 0 | 0 | 0  | 0 | 0 |
| 0 | 0 | 0 | 99 | 0 | 0 |
| 0 | 1 | 0 | 0  | 0 | 0 |
| 0 | 0 | 0 | 0  | 0 | 0 |
| 0 | 0 | 0 | 0  | 0 | 0 |
| 0 | 0 | 0 | 1  | 0 | 0 |
| 0 | 0 | 0 | 1  | 0 | 0 |
| 0 | 0 | 0 | 0  | 0 | 0 |
| 0 | 1 | 0 | 1  | 0 | 0 |
| 0 | 0 | 0 | 1  | 0 | 0 |
| 0 | 0 | 0 | 0  | 0 | 0 |
| 0 | 0 | 0 | 1  | 0 | 0 |
| 0 | 0 | 0 | 0  | 0 | 0 |
| 0 | 0 | 0 | 1  | 0 | 0 |
| 0 | 1 | 0 | 1  | 0 | 0 |
| 0 | 0 | 0 | 1  | 0 | 0 |



|   |   |   |    |   |   |
|---|---|---|----|---|---|
| 0 | 0 | 0 | 1  | 0 | 0 |
| 0 | 0 | 0 | 1  | 0 | 0 |
| 0 | 1 | 0 | 0  | 0 | 0 |
| 0 | 0 | 0 | 1  | 0 | 0 |
| 0 | 0 | 0 | 1  | 0 | 0 |
| 0 | 0 | 0 | 1  | 0 | 0 |
| 0 | 0 | 0 | 1  | 0 | 0 |
| 0 | 0 | 0 | 0  | 0 | 0 |
| 0 | 0 | 1 | 0  | 0 | 0 |
| 0 | 0 | 0 | 1  | 0 | 0 |
| 0 | 0 | 0 | 0  | 0 | 0 |
| 0 | 0 | 0 | 1  | 0 | 0 |
| 0 | 0 | 0 | 1  | 0 | 0 |
| 0 | 0 | 0 | 1  | 0 | 0 |
| 0 | 0 | 0 | 0  | 1 | 0 |
| 0 | 0 | 0 | 1  | 0 | 0 |
| 0 | 0 | 0 | 1  | 0 | 0 |
| 0 | 0 | 0 | 1  | 0 | 0 |
| 0 | 0 | 0 | 1  | 0 | 0 |
| 0 | 0 | 0 | 1  | 0 | 0 |
| 0 | 0 | 0 | 1  | 0 | 0 |
| 0 | 0 | 0 | 1  | 0 | 0 |
| 0 | 0 | 0 | 1  | 0 | 0 |
| 0 | 0 | 0 | 0  | 0 | 0 |
| 0 | 0 | 0 | 1  | 0 | 0 |
| 0 | 1 | 0 | 0  | 1 | 0 |
| 0 | 0 | 0 | 0  | 0 | 0 |
| 0 | 0 | 0 | 1  | 0 | 0 |
| 0 | 0 | 0 | 1  | 0 | 0 |
| 0 | 0 | 0 | 1  | 0 | 0 |
| 0 | 0 | 0 | 1  | 0 | 0 |
| 0 | 0 | 0 | 1  | 0 | 0 |
| 0 | 0 | 0 | 1  | 0 | 0 |
| 0 | 0 | 0 | 0  | 1 | 0 |
| 1 | 0 | 0 | 1  | 0 | 0 |
| 0 | 0 | 0 | 99 | 0 | 0 |
| 0 | 0 | 0 | 1  | 0 | 0 |
| 0 | 0 | 0 | 99 | 0 | 0 |
| 0 | 0 | 0 | 0  | 0 | 0 |
| 0 | 1 | 0 | 0  | 0 | 0 |
| 0 | 1 | 0 | 1  | 0 | 0 |
| 0 | 0 | 0 | 1  | 0 | 0 |
| 0 | 0 | 0 | 1  | 1 | 0 |
| 0 | 0 | 0 | 0  | 1 | 0 |
| 1 | 0 | 0 | 1  | 1 | 0 |
| 0 | 0 | 0 | 1  | 1 | 0 |
| 0 | 1 | 0 | 1  | 0 | 0 |





|   |   |   |   |    |   |
|---|---|---|---|----|---|
| 0 | 0 | 0 | 0 | 1  | 0 |
| 0 | 1 | 0 | 1 | 1  | 0 |
| 0 | 0 | 0 | 1 | 0  | 0 |
| 0 | 0 | 0 | 0 | 0  | 0 |
| 0 | 0 | 0 | 0 | 0  | 0 |
| 0 | 0 | 0 | 0 | 0  | 0 |
| 0 | 0 | 0 | 0 | 0  | 0 |
| 0 | 0 | 1 | 0 | 0  | 0 |
| 0 | 0 | 1 | 0 | 0  | 0 |
| 0 | 0 | 0 | 1 | 0  | 0 |
| 0 | 0 | 0 | 1 | 0  | 0 |
| 0 | 0 | 0 | 1 | 0  | 0 |
| 0 | 0 | 0 | 1 | 0  | 0 |
| 0 | 0 | 0 | 1 | 0  | 0 |
| 0 | 0 | 0 | 0 | 0  | 0 |
| 1 | 0 | 0 | 0 | 0  | 0 |
| 0 | 0 | 0 | 0 | 0  | 0 |
| 0 | 0 | 0 | 0 | 0  | 0 |
| 0 | 0 | 0 | 0 | 0  | 0 |
| 0 | 0 | 0 | 0 | 0  | 0 |
| 0 | 0 | 0 | 0 | 0  | 0 |
| 0 | 0 | 0 | 0 | 0  | 0 |
| 0 | 0 | 0 | 0 | 99 | 0 |
| 0 | 0 | 0 | 0 | 0  | 0 |
| 0 | 0 | 0 | 0 | 0  | 0 |
| 0 | 0 | 1 | 0 | 0  | 0 |
| 0 | 0 | 0 | 0 | 99 | 0 |
| 0 | 0 | 0 | 0 | 1  | 0 |
| 0 | 0 | 0 | 0 | 0  | 0 |
| 0 | 0 | 0 | 0 | 1  | 0 |
| 0 | 0 | 0 | 0 | 1  | 0 |
| 0 | 0 | 0 | 0 | 1  | 0 |
| 0 | 0 | 0 | 0 | 1  | 0 |
| 0 | 0 | 0 | 0 | 1  | 0 |
| 0 | 0 | 0 | 0 | 1  | 0 |
| 0 | 0 | 0 | 0 | 0  | 0 |
| 0 | 0 | 0 | 0 | 0  | 0 |
| 0 | 0 | 0 | 0 | 1  | 0 |
| 0 | 0 | 0 | 0 | 1  | 0 |
| 0 | 0 | 0 | 0 | 1  | 0 |
| 0 | 0 | 0 | 0 | 0  | 0 |
| 0 | 0 | 0 | 0 | 1  | 0 |
| 0 | 0 | 0 | 0 | 1  | 0 |
| 0 | 0 | 0 | 0 | 1  | 0 |
| 0 | 0 | 0 | 0 | 1  | 0 |
| 0 | 0 | 0 | 0 | 0  | 0 |
| 0 | 0 | 0 | 0 | 1  | 0 |
| 0 | 0 | 0 | 0 | 1  | 0 |
| 0 | 0 | 0 | 0 | 1  | 0 |
| 1 | 0 | 0 | 0 | 0  | 1 |
| 0 | 0 | 0 | 0 | 1  | 0 |
| 0 | 0 | 0 | 0 | 1  | 0 |
| 0 | 0 | 0 | 0 | 0  | 0 |
| 0 | 0 | 0 | 0 | 1  | 0 |
| 0 | 0 | 0 | 0 | 1  | 0 |
| 0 | 0 | 0 | 0 | 1  | 0 |
| 0 | 0 | 0 | 0 | 0  | 0 |
| 0 | 0 | 0 | 0 | 1  | 0 |
| 0 | 0 | 0 | 0 | 99 | 0 |

|   |   |   |   |   |   |
|---|---|---|---|---|---|
| 0 | 0 | 0 | 0 | 0 | 0 |
| 0 | 0 | 0 | 1 | 0 | 0 |
| 0 | 0 | 0 | 0 | 0 | 0 |
| 0 | 0 | 0 | 0 | 0 | 0 |
| 0 | 0 | 0 | 1 | 0 | 0 |
| 0 | 0 | 0 | 1 | 0 | 0 |
| 0 | 0 | 0 | 1 | 0 | 0 |
| 0 | 0 | 0 | 0 | 0 | 0 |
| 0 | 1 | 0 | 0 | 0 | 0 |
| 0 | 0 | 0 | 1 | 0 | 0 |
| 0 | 0 | 0 | 0 | 1 | 0 |
| 0 | 0 | 0 | 0 | 0 | 0 |
| 0 | 0 | 0 | 0 | 0 | 0 |
| 0 | 1 | 0 | 0 | 0 | 0 |
| 0 | 1 | 0 | 0 | 1 | 0 |
| 0 | 0 | 0 | 0 | 0 | 0 |
| 0 | 0 | 0 | 1 | 0 | 0 |
| 0 | 0 | 0 | 0 | 0 | 0 |
| 0 | 0 | 0 | 0 | 0 | 0 |
| 0 | 0 | 0 | 1 | 0 | 0 |
| 0 | 0 | 0 | 0 | 0 | 0 |
| 0 | 0 | 0 | 0 | 0 | 0 |
| 0 | 1 | 0 | 0 | 0 | 0 |
| 0 | 1 | 0 | 0 | 0 | 0 |
| 0 | 0 | 0 | 0 | 0 | 0 |
| 0 | 0 | 0 | 1 | 0 | 0 |
| 0 | 0 | 0 | 1 | 1 | 0 |
| 0 | 0 | 0 | 1 | 0 | 1 |
| 0 | 0 | 0 | 0 | 0 | 1 |
| 0 | 0 | 0 | 1 | 0 | 0 |
| 0 | 0 | 0 | 1 | 1 | 0 |
| 0 | 0 | 0 | 1 | 0 | 0 |
| 1 | 0 | 0 | 1 | 0 | 0 |
| 0 | 0 | 0 | 1 | 0 | 0 |
| 1 | 0 | 0 | 1 | 0 | 0 |
| 0 | 0 | 0 | 0 | 0 | 0 |

|   |   |   |   |   |   |
|---|---|---|---|---|---|
| 0 | 0 | 0 | 0 | 0 | 0 |
| 0 | 0 | 0 | 1 | 0 | 0 |
| 0 | 0 | 0 | 1 | 0 | 0 |
| 0 | 0 | 0 | 1 | 0 | 0 |
| 0 | 0 | 0 | 0 | 0 | 0 |
| 0 | 0 | 0 | 1 | 0 | 0 |
| 0 | 0 | 0 | 1 | 0 | 0 |
| 0 | 0 | 0 | 0 | 0 | 0 |
| 0 | 0 | 0 | 1 | 0 | 0 |
| 0 | 0 | 0 | 1 | 0 | 0 |
| 0 | 0 | 0 | 0 | 0 | 0 |
| 0 | 0 | 0 | 1 | 0 | 0 |
| 0 | 0 | 0 | 0 | 0 | 0 |
| 0 | 0 | 0 | 0 | 1 | 0 |
| 0 | 0 | 0 | 0 | 0 | 0 |
| 0 | 0 | 0 | 0 | 0 | 0 |
| 0 | 0 | 0 | 0 | 0 | 0 |
| 0 | 0 | 0 | 1 | 0 | 0 |
| 0 | 0 | 0 | 1 | 1 | 0 |
| 0 | 0 | 0 | 0 | 0 | 0 |
| 1 | 0 | 0 | 0 | 0 | 0 |
| 1 | 0 | 0 | 1 | 0 | 0 |
| 0 | 0 | 0 | 1 | 0 | 0 |
| 0 | 0 | 0 | 0 | 0 | 0 |
| 0 | 0 | 0 | 1 | 0 | 0 |
| 0 | 0 | 1 | 1 | 0 | 0 |
| 0 | 0 | 0 | 1 | 1 | 0 |
| 0 | 0 | 0 | 0 | 0 | 0 |
| 0 | 0 | 0 | 1 | 0 | 0 |
| 0 | 0 | 0 | 0 | 0 | 0 |
| 0 | 0 | 0 | 0 | 0 | 0 |
| 0 | 0 | 0 | 0 | 0 | 0 |
| 0 | 0 | 0 | 1 | 0 | 0 |
| 0 | 0 | 0 | 0 | 0 | 0 |
| 0 | 0 | 0 | 0 | 0 | 0 |
| 0 | 0 | 0 | 0 | 0 | 0 |
| 0 | 0 | 0 | 0 | 0 | 0 |
| 0 | 0 | 0 | 0 | 0 | 0 |
| 0 | 0 | 0 | 1 | 0 | 0 |
| 0 | 0 | 0 | 0 | 1 | 0 |
| 0 | 0 | 0 | 0 | 0 | 0 |
| 0 | 0 | 0 | 0 | 0 | 0 |
| 0 | 0 | 0 | 1 | 0 | 0 |





|   |   |   |   |   |   |
|---|---|---|---|---|---|
| 0 | 0 | 0 | 1 | 0 | 0 |
| 0 | 0 | 0 | 1 | 0 | 0 |
| 0 | 0 | 0 | 1 | 0 | 0 |
| 0 | 0 | 0 | 0 | 0 | 0 |
| 0 | 0 | 0 | 0 | 0 | 0 |
| 0 | 0 | 0 | 1 | 0 | 0 |
| 0 | 0 | 0 | 1 | 0 | 0 |
| 0 | 0 | 0 | 1 | 0 | 0 |
| 0 | 0 | 0 | 1 | 0 | 0 |
| 1 | 0 | 0 | 1 | 0 | 0 |
| 0 | 0 | 0 | 0 | 1 | 0 |
| 0 | 0 | 1 | 1 | 0 | 0 |
| 0 | 0 | 0 | 1 | 0 | 0 |
| 0 | 0 | 0 | 1 | 0 | 0 |
| 0 | 1 | 0 | 1 | 0 | 0 |
| 0 | 0 | 0 | 0 | 0 | 0 |
| 0 | 0 | 0 | 1 | 0 | 0 |
| 0 | 0 | 0 | 0 | 0 | 0 |
| 0 | 0 | 0 | 1 | 0 | 0 |
| 0 | 0 | 0 | 0 | 0 | 0 |
| 0 | 0 | 0 | 1 | 0 | 0 |
| 0 | 0 | 0 | 0 | 0 | 0 |
| 0 | 0 | 0 | 1 | 0 | 0 |
| 0 | 0 | 0 | 0 | 0 | 0 |
| 0 | 0 | 0 | 1 | 0 | 0 |
| 0 | 0 | 0 | 1 | 0 | 0 |
| 0 | 0 | 0 | 1 | 0 | 0 |
| 0 | 0 | 0 | 1 | 0 | 0 |
| 0 | 0 | 0 | 1 | 0 | 0 |
| 0 | 0 | 0 | 1 | 0 | 0 |
| 0 | 0 | 0 | 0 | 0 | 0 |
| 0 | 0 | 0 | 0 | 0 | 0 |
| 0 | 0 | 0 | 0 | 0 | 0 |
| 0 | 0 | 0 | 0 | 0 | 0 |
| 0 | 0 | 0 | 1 | 0 | 0 |
| 0 | 0 | 1 | 0 | 0 | 0 |
| 0 | 0 | 0 | 1 | 0 | 0 |
| 0 | 0 | 0 | 1 | 0 | 0 |
| 0 | 0 | 0 | 0 | 0 | 0 |
| 0 | 0 | 0 | 1 | 0 | 0 |
| 0 | 0 | 0 | 0 | 0 | 0 |
| 0 | 0 | 0 | 0 | 0 | 0 |
| 0 | 0 | 0 | 1 | 0 | 0 |
| 0 | 0 | 0 | 1 | 0 | 0 |
| 0 | 0 | 0 | 0 | 0 | 0 |
| 0 | 0 | 0 | 0 | 0 | 0 |
| 0 | 0 | 0 | 1 | 0 | 0 |
| 0 | 0 | 0 | 1 | 0 | 0 |
| 0 | 0 | 0 | 0 | 0 | 0 |
| 0 | 0 | 0 | 1 | 0 | 0 |
| 0 | 0 | 0 | 1 | 0 | 0 |
| 0 | 0 | 0 | 0 | 0 | 0 |
| 0 | 0 | 0 | 1 | 0 | 0 |
| 0 | 0 | 0 | 1 | 0 | 0 |
| 0 | 0 | 0 | 0 | 0 | 0 |
| 0 | 0 | 0 | 0 | 0 | 0 |
| 0 | 0 | 0 | 1 | 0 | 0 |
| 0 | 0 | 0 | 1 | 0 | 0 |

|   |   |   |   |   |   |
|---|---|---|---|---|---|
| 0 | 0 | 0 | 0 | 0 | 0 |
| 0 | 0 | 0 | 0 | 0 | 0 |
| 0 | 0 | 0 | 1 | 0 | 0 |
| 0 | 0 | 0 | 0 | 0 | 0 |
| 0 | 0 | 0 | 0 | 1 | 0 |
| 0 | 0 | 0 | 1 | 0 | 0 |
| 0 | 0 | 0 | 0 | 0 | 0 |
| 0 | 0 | 0 | 1 | 0 | 0 |
| 0 | 0 | 0 | 0 | 0 | 0 |
| 0 | 0 | 0 | 1 | 0 | 0 |
| 0 | 0 | 0 | 0 | 0 | 0 |
| 0 | 0 | 0 | 0 | 0 | 0 |
| 0 | 0 | 0 | 0 | 0 | 0 |
| 0 | 1 | 0 | 0 | 0 | 0 |
| 0 | 0 | 0 | 0 | 0 | 0 |
| 0 | 0 | 0 | 0 | 1 | 0 |
| 0 | 0 | 0 | 0 | 0 | 0 |
| 0 | 0 | 0 | 1 | 0 | 0 |
| 0 | 0 | 0 | 1 | 0 | 0 |
| 0 | 0 | 0 | 0 | 0 | 0 |
| 0 | 0 | 0 | 0 | 0 | 0 |
| 0 | 0 | 0 | 0 | 1 | 0 |
| 0 | 0 | 0 | 1 | 0 | 0 |
| 0 | 0 | 0 | 0 | 0 | 0 |
| 1 | 0 | 0 | 0 | 0 | 0 |
| 0 | 0 | 0 | 1 | 1 | 0 |
| 0 | 0 | 0 | 1 | 0 | 0 |
| 0 | 0 | 0 | 0 | 0 | 0 |
| 0 | 0 | 0 | 1 | 0 | 0 |
| 0 | 0 | 0 | 0 | 0 | 0 |
| 0 | 0 | 0 | 0 | 0 | 0 |
| 0 | 1 | 0 | 1 | 0 | 0 |
| 0 | 0 | 0 | 0 | 0 | 0 |
| 0 | 0 | 0 | 0 | 0 | 0 |
| 0 | 0 | 0 | 0 | 0 | 0 |
| 0 | 1 | 0 | 0 | 0 | 0 |
| 0 | 0 | 0 | 1 | 0 | 0 |
| 0 | 0 | 0 | 0 | 0 | 0 |
| 0 | 0 | 0 | 0 | 0 | 0 |
| 0 | 0 | 0 | 0 | 0 | 0 |
| 0 | 0 | 0 | 0 | 0 | 0 |
| 0 | 0 | 0 | 0 | 0 | 0 |
| 0 | 0 | 0 | 0 | 0 | 0 |
| 0 | 0 | 0 | 0 | 0 | 0 |
| 0 | 0 | 0 | 0 | 0 | 0 |
| 0 | 0 | 0 | 1 | 0 | 0 |
| 0 | 0 | 0 | 0 | 0 | 0 |
| 0 | 0 | 0 | 0 | 0 | 0 |

|   |   |   |   |   |   |
|---|---|---|---|---|---|
| 0 | 0 | 1 | 0 | 0 | 0 |
| 0 | 0 | 0 | 0 | 0 | 0 |
| 0 | 0 | 0 | 1 | 0 | 0 |
| 0 | 0 | 0 | 0 | 0 | 0 |
| 0 | 0 | 0 | 0 | 0 | 0 |
| 0 | 1 | 0 | 1 | 0 | 0 |
| 0 | 0 | 1 | 1 | 0 | 0 |
| 0 | 0 | 0 | 1 | 0 | 0 |
| 0 | 0 | 0 | 0 | 1 | 0 |
| 0 | 0 | 0 | 1 | 1 | 0 |
| 0 | 0 | 0 | 0 | 0 | 0 |
| 0 | 1 | 0 | 0 | 0 | 0 |
| 0 | 0 | 0 | 0 | 0 | 0 |
| 0 | 0 | 0 | 1 | 0 | 0 |
| 0 | 0 | 0 | 0 | 0 | 0 |
| 0 | 0 | 0 | 0 | 0 | 0 |
| 0 | 0 | 0 | 1 | 0 | 0 |
| 0 | 0 | 0 | 1 | 0 | 0 |
| 0 | 0 | 0 | 0 | 0 | 0 |
| 0 | 0 | 0 | 1 | 0 | 0 |
| 0 | 0 | 0 | 1 | 0 | 0 |
| 0 | 0 | 0 | 0 | 0 | 0 |
| 0 | 0 | 0 | 1 | 0 | 0 |
| 0 | 0 | 0 | 1 | 0 | 0 |
| 0 | 0 | 0 | 0 | 0 | 0 |
| 0 | 0 | 0 | 0 | 0 | 0 |
| 0 | 0 | 0 | 1 | 1 | 0 |
| 0 | 0 | 0 | 0 | 0 | 0 |
| 0 | 0 | 0 | 1 | 0 | 0 |
| 0 | 0 | 0 | 0 | 0 | 0 |
| 0 | 0 | 0 | 0 | 0 | 0 |
| 0 | 0 | 0 | 1 | 0 | 0 |
| 0 | 0 | 0 | 0 | 0 | 0 |
| 0 | 0 | 0 | 1 | 0 | 0 |
| 0 | 0 | 0 | 1 | 0 | 0 |
| 0 | 0 | 0 | 0 | 0 | 0 |
| 0 | 0 | 0 | 1 | 0 | 0 |
| 0 | 0 | 0 | 0 | 0 | 0 |
| 0 | 0 | 1 | 1 | 0 | 0 |
| 0 | 0 | 0 | 1 | 0 | 0 |
| 0 | 0 | 0 | 0 | 0 | 0 |
| 0 | 1 | 0 | 0 | 0 | 0 |

|   |   |   |    |   |   |
|---|---|---|----|---|---|
| 0 | 0 | 0 | 1  | 0 | 0 |
| 0 | 0 | 0 | 1  | 0 | 0 |
| 0 | 0 | 0 | 1  | 0 | 0 |
| 0 | 0 | 0 | 1  | 0 | 0 |
| 0 | 0 | 0 | 0  | 0 | 0 |
| 0 | 0 | 0 | 0  | 0 | 0 |
| 1 | 1 | 0 | 0  | 0 | 0 |
| 0 | 0 | 0 | 1  | 0 | 0 |
| 0 | 0 | 0 | 0  | 0 | 0 |
| 0 | 0 | 0 | 0  | 1 | 0 |
| 0 | 0 | 0 | 1  | 0 | 0 |
| 0 | 0 | 0 | 0  | 0 | 0 |
| 0 | 0 | 0 | 1  | 0 | 0 |
| 0 | 0 | 0 | 1  | 0 | 0 |
| 0 | 0 | 0 | 1  | 0 | 0 |
| 0 | 0 | 0 | 1  | 0 | 0 |
| 0 | 0 | 0 | 0  | 0 | 0 |
| 0 | 0 | 0 | 1  | 0 | 0 |
| 1 | 0 | 0 | 1  | 0 | 0 |
| 0 | 0 | 0 | 0  | 0 | 0 |
| 0 | 0 | 0 | 0  | 0 | 0 |
| 0 | 0 | 0 | 0  | 0 | 0 |
| 0 | 0 | 0 | 0  | 0 | 0 |
| 0 | 0 | 0 | 0  | 0 | 0 |
| 0 | 0 | 0 | 0  | 0 | 0 |
| 0 | 0 | 0 | 0  | 0 | 0 |
| 0 | 0 | 0 | 0  | 0 | 0 |
| 0 | 0 | 0 | 0  | 1 | 0 |
| 0 | 0 | 0 | 0  | 0 | 0 |
| 1 | 0 | 0 | 1  | 0 | 0 |
| 0 | 0 | 0 | 0  | 0 | 0 |
| 0 | 0 | 0 | 0  | 0 | 0 |
| 0 | 0 | 0 | 0  | 0 | 0 |
| 0 | 0 | 0 | 0  | 0 | 0 |
| 0 | 0 | 0 | 0  | 0 | 0 |
| 0 | 0 | 0 | 99 | 0 | 0 |
| 0 | 0 | 0 | 0  | 0 | 0 |
| 0 | 0 | 0 | 0  | 0 | 0 |
| 0 | 0 | 0 | 0  | 0 | 0 |
| 0 | 1 | 0 | 0  | 0 | 0 |
| 0 | 0 | 0 | 0  | 1 | 0 |
| 0 | 0 | 0 | 0  | 0 | 0 |
| 0 | 0 | 0 | 1  | 0 | 0 |
| 0 | 0 | 0 | 99 | 0 | 0 |
| 0 | 0 | 0 | 99 | 0 | 0 |
| 0 | 0 | 0 | 0  | 1 | 0 |
| 0 | 1 | 0 | 0  | 0 | 0 |
| 0 | 0 | 0 | 1  | 0 | 0 |
| 0 | 0 | 0 | 0  | 0 | 0 |
| 1 | 0 | 0 | 0  | 0 | 0 |
| 0 | 1 | 0 | 1  | 0 | 0 |
| 0 | 0 | 0 | 1  | 0 | 0 |
| 1 | 0 | 0 | 1  | 0 | 0 |
| 0 | 0 | 0 | 0  | 0 | 0 |
| 0 | 0 | 0 | 0  | 1 | 0 |











|   |   |   |   |   |   |
|---|---|---|---|---|---|
| 0 | 0 | 0 | 0 | 0 | 0 |
| 0 | 0 | 0 | 0 | 0 | 0 |
| 0 | 0 | 0 | 1 | 0 | 0 |
| 0 | 0 | 0 | 0 | 0 | 0 |
| 0 | 0 | 0 | 0 | 0 | 0 |
| 0 | 0 | 0 | 1 | 0 | 0 |
| 0 | 0 | 0 | 1 | 0 | 0 |
| 0 | 0 | 0 | 0 | 0 | 0 |
| 0 | 0 | 0 | 0 | 0 | 0 |
| 0 | 0 | 0 | 0 | 0 | 0 |
| 0 | 0 | 0 | 1 | 0 | 0 |
| 0 | 0 | 0 | 0 | 0 | 0 |
| 0 | 0 | 0 | 0 | 0 | 0 |
| 1 | 0 | 0 | 1 | 0 | 0 |
| 0 | 1 | 0 | 0 | 0 | 0 |
| 0 | 0 | 0 | 1 | 1 | 0 |
| 0 | 0 | 0 | 0 | 1 | 0 |
| 0 | 0 | 0 | 1 | 0 | 0 |
| 0 | 1 | 0 | 1 | 0 | 0 |
| 0 | 1 | 0 | 0 | 0 | 0 |
| 0 | 0 | 0 | 1 | 0 | 0 |
| 0 | 0 | 0 | 1 | 0 | 0 |
| 0 | 0 | 0 | 1 | 0 | 0 |
| 0 | 0 | 0 | 1 | 0 | 0 |
| 0 | 0 | 0 | 1 | 0 | 0 |
| 1 | 0 | 0 | 0 | 0 | 0 |
| 0 | 0 | 0 | 0 | 0 | 0 |
| 0 | 0 | 0 | 1 | 1 | 0 |
| 0 | 0 | 0 | 1 | 0 | 0 |
| 0 | 0 | 0 | 0 | 0 | 0 |
| 0 | 0 | 0 | 1 | 0 | 0 |
| 1 | 0 | 0 | 1 | 0 | 0 |
| 0 | 1 | 0 | 1 | 0 | 0 |
| 0 | 0 | 0 | 0 | 0 | 0 |
| 0 | 0 | 0 | 0 | 0 | 0 |
| 0 | 1 | 0 | 0 | 0 | 0 |
| 0 | 0 | 0 | 0 | 0 | 0 |
| 0 | 1 | 0 | 0 | 0 | 0 |
| 0 | 0 | 0 | 0 | 0 | 0 |
| 0 | 1 | 0 | 0 | 0 | 0 |
| 0 | 0 | 0 | 0 | 0 | 0 |

|   |   |   |   |   |   |
|---|---|---|---|---|---|
| 0 | 0 | 0 | 0 | 0 | 0 |
| 0 | 0 | 0 | 0 | 0 | 0 |
| 0 | 0 | 0 | 0 | 0 | 0 |
| 0 | 1 | 0 | 1 | 0 | 0 |
| 0 | 1 | 0 | 0 | 0 | 0 |
| 0 | 0 | 0 | 1 | 0 | 0 |
| 1 | 0 | 0 | 0 | 0 | 0 |
| 0 | 0 | 0 | 0 | 0 | 0 |
| 0 | 0 | 0 | 1 | 0 | 0 |
| 0 | 0 | 0 | 1 | 0 | 0 |
| 0 | 0 | 0 | 0 | 0 | 0 |
| 1 | 0 | 0 | 1 | 0 | 0 |
| 0 | 1 | 0 | 1 | 0 | 0 |
| 0 | 0 | 1 | 0 | 0 | 0 |
| 0 | 0 | 0 | 0 | 0 | 0 |
| 0 | 0 | 0 | 1 | 0 | 0 |
| 0 | 0 | 0 | 1 | 0 | 0 |
| 0 | 0 | 0 | 1 | 0 | 0 |
| 0 | 0 | 0 | 1 | 0 | 0 |
| 0 | 0 | 0 | 0 | 0 | 0 |
| 0 | 0 | 0 | 1 | 1 | 0 |
| 0 | 0 | 0 | 0 | 0 | 0 |
| 0 | 1 | 0 | 1 | 1 | 0 |
| 0 | 0 | 0 | 1 | 1 | 0 |
| 0 | 0 | 0 | 0 | 0 | 0 |
| 0 | 0 | 0 | 1 | 0 | 0 |
| 0 | 0 | 0 | 0 | 0 | 0 |
| 0 | 0 | 0 | 0 | 0 | 0 |
| 0 | 0 | 0 | 1 | 0 | 0 |
| 0 | 0 | 0 | 1 | 0 | 0 |
| 0 | 0 | 0 | 0 | 0 | 0 |
| 0 | 0 | 0 | 1 | 0 | 0 |
| 0 | 0 | 0 | 1 | 0 | 0 |
| 0 | 0 | 0 | 0 | 0 | 0 |
| 0 | 0 | 0 | 1 | 0 | 0 |
| 0 | 1 | 0 | 1 | 0 | 0 |
| 0 | 0 | 0 | 0 | 0 | 0 |
| 0 | 0 | 0 | 1 | 0 | 0 |
| 0 | 0 | 1 | 0 | 0 | 0 |
| 0 | 0 | 0 | 0 | 0 | 0 |
| 0 | 0 | 0 | 0 | 0 | 0 |
| 0 | 0 | 0 | 0 | 0 | 0 |
| 0 | 0 | 0 | 1 | 0 | 0 |

|   |   |   |    |   |   |
|---|---|---|----|---|---|
| 0 | 0 | 0 | 0  | 0 | 0 |
| 0 | 0 | 0 | 0  | 0 | 0 |
| 0 | 0 | 0 | 1  | 1 | 0 |
| 0 | 0 | 0 | 0  | 0 | 0 |
| 0 | 0 | 0 | 0  | 0 | 0 |
| 1 | 0 | 0 | 1  | 0 | 0 |
| 0 | 0 | 0 | 1  | 0 | 0 |
| 0 | 0 | 0 | 0  | 0 | 0 |
| 0 | 0 | 0 | 1  | 0 | 0 |
| 0 | 0 | 0 | 1  | 0 | 0 |
| 0 | 0 | 0 | 1  | 0 | 0 |
| 0 | 0 | 0 | 1  | 1 | 0 |
| 0 | 0 | 0 | 0  | 0 | 0 |
| 0 | 0 | 0 | 1  | 0 | 0 |
| 0 | 0 | 0 | 0  | 0 | 0 |
| 0 | 0 | 0 | 0  | 0 | 0 |
| 0 | 0 | 0 | 1  | 0 | 0 |
| 0 | 0 | 0 | 1  | 1 | 0 |
| 0 | 0 | 0 | 0  | 0 | 0 |
| 0 | 0 | 0 | 1  | 1 | 0 |
| 0 | 0 | 0 | 0  | 0 | 0 |
| 0 | 0 | 0 | 1  | 0 | 0 |
| 0 | 0 | 0 | 1  | 0 | 0 |
| 0 | 0 | 0 | 0  | 0 | 0 |
| 0 | 0 | 0 | 0  | 0 | 0 |
| 0 | 0 | 0 | 1  | 0 | 0 |
| 0 | 0 | 0 | 1  | 0 | 0 |
| 0 | 0 | 0 | 0  | 0 | 0 |
| 0 | 0 | 0 | 99 | 0 | 0 |
| 0 | 0 | 0 | 1  | 0 | 0 |
| 0 | 1 | 0 | 0  | 0 | 0 |
| 0 | 0 | 0 | 1  | 0 | 0 |
| 0 | 0 | 0 | 0  | 0 | 0 |
| 0 | 1 | 0 | 0  | 0 | 0 |
| 0 | 1 | 0 | 0  | 0 | 0 |
| 0 | 0 | 0 | 1  | 0 | 0 |
| 0 | 0 | 0 | 99 | 0 | 0 |
| 0 | 0 | 0 | 0  | 0 | 0 |
| 1 | 0 | 0 | 0  | 0 | 0 |
| 0 | 0 | 0 | 0  | 0 | 0 |
| 0 | 0 | 0 | 1  | 0 | 0 |
| 0 | 0 | 0 | 0  | 0 | 0 |
| 0 | 0 | 0 | 0  | 0 | 0 |
| 1 | 0 | 0 | 0  | 0 | 0 |
| 0 | 0 | 0 | 0  | 0 | 0 |
| 1 | 0 | 0 | 0  | 0 | 0 |
| 0 | 0 | 1 | 99 | 0 | 0 |
| 0 | 0 | 1 | 0  | 0 | 0 |
| 0 | 0 | 0 | 1  | 0 | 0 |
| 0 | 1 | 0 | 0  | 0 | 0 |

|   |   |   |    |   |
|---|---|---|----|---|
| 0 | 1 | 0 | 0  | 0 |
| 0 | 0 | 0 | 1  | 0 |
| 0 | 0 | 0 | 1  | 0 |
| 0 | 0 | 0 | 1  | 0 |
| 0 | 0 | 0 | 0  | 0 |
| 0 | 1 | 0 | 0  | 0 |
| 0 | 1 | 0 | 1  | 0 |
| 0 | 0 | 0 | 0  | 1 |
| 0 | 0 | 0 | 1  | 1 |
| 0 | 0 | 0 | 0  | 0 |
| 0 | 0 | 1 | 99 | 0 |
| 0 | 0 | 0 | 0  | 0 |
| 0 | 0 | 0 | 1  | 0 |
| 0 | 1 | 0 | 0  | 1 |
| 0 | 0 | 0 | 1  | 0 |
| 0 | 0 | 0 | 1  | 0 |
| 1 | 0 | 0 | 1  | 0 |
| 1 | 0 | 0 | 1  | 0 |
| 0 | 0 | 0 | 1  | 0 |
| 0 | 0 | 0 | 0  | 0 |
| 0 | 1 | 0 | 0  | 1 |
| 0 | 0 | 0 | 1  | 0 |
| 0 | 0 | 1 | 0  | 0 |
| 0 | 0 | 0 | 1  | 0 |
| 0 | 1 | 0 | 1  | 0 |
| 0 | 0 | 0 | 0  | 0 |
| 0 | 0 | 0 | 1  | 0 |
| 0 | 0 | 0 | 0  | 1 |
| 0 | 0 | 0 | 1  | 0 |
| 0 | 1 | 0 | 0  | 0 |
| 0 | 0 | 1 | 0  | 0 |
| 0 | 0 | 0 | 0  | 0 |
| 1 | 0 | 0 | 1  | 0 |
| 0 | 0 | 0 | 0  | 0 |
| 0 | 0 | 0 | 0  | 0 |
| 0 | 0 | 0 | 1  | 0 |
| 0 | 0 | 0 | 0  | 0 |
| 0 | 0 | 0 | 0  | 0 |
| 0 | 0 | 0 | 1  | 1 |
| 0 | 0 | 0 | 0  | 0 |
| 0 | 0 | 0 | 0  | 0 |
| 0 | 0 | 0 | 1  | 0 |
| 0 | 1 | 0 | 1  | 0 |
| 0 | 0 | 0 | 1  | 1 |
| 0 | 1 | 0 | 1  | 0 |
| 0 | 1 | 0 | 1  | 0 |
| 0 | 0 | 0 | 1  | 0 |
| 0 | 0 | 0 | 0  | 0 |

|   |   |   |   |   |   |
|---|---|---|---|---|---|
| 0 | 0 | 0 | 0 | 0 | 0 |
| 0 | 0 | 0 | 1 | 1 | 0 |
| 0 | 0 | 0 | 0 | 0 | 0 |
| 0 | 0 | 0 | 0 | 0 | 0 |
| 0 | 0 | 0 | 1 | 0 | 0 |
| 0 | 0 | 0 | 1 | 0 | 0 |
| 0 | 0 | 0 | 1 | 0 | 0 |
| 0 | 0 | 0 | 1 | 0 | 0 |
| 0 | 0 | 0 | 1 | 0 | 0 |
| 0 | 0 | 0 | 0 | 0 | 0 |
| 0 | 0 | 0 | 0 | 0 | 0 |
| 0 | 0 | 0 | 0 | 1 | 0 |
| 0 | 0 | 0 | 1 | 1 | 0 |
| 0 | 0 | 0 | 0 | 0 | 0 |
| 0 | 0 | 0 | 1 | 0 | 0 |
| 0 | 0 | 0 | 1 | 0 | 0 |
| 0 | 0 | 0 | 0 | 1 | 0 |
| 0 | 0 | 0 | 1 | 0 | 0 |
| 0 | 0 | 0 | 0 | 1 | 0 |
| 0 | 0 | 0 | 0 | 0 | 0 |
| 0 | 0 | 0 | 0 | 0 | 0 |
| 0 | 0 | 0 | 0 | 0 | 0 |
| 0 | 0 | 0 | 0 | 0 | 0 |
| 0 | 0 | 0 | 1 | 0 | 0 |
| 0 | 0 | 0 | 1 | 0 | 0 |
| 0 | 0 | 0 | 1 | 0 | 0 |
| 0 | 0 | 0 | 0 | 0 | 0 |
| 0 | 0 | 0 | 0 | 0 | 0 |
| 0 | 0 | 0 | 0 | 0 | 0 |
| 0 | 0 | 0 | 0 | 0 | 0 |
| 0 | 0 | 0 | 1 | 0 | 0 |
| 0 | 0 | 0 | 1 | 0 | 0 |
| 0 | 0 | 0 | 0 | 0 | 0 |
| 0 | 0 | 0 | 0 | 0 | 0 |
| 0 | 0 | 0 | 0 | 0 | 0 |
| 0 | 0 | 0 | 0 | 1 | 0 |
| 0 | 1 | 0 | 1 | 0 | 0 |
| 0 | 0 | 0 | 0 | 0 | 0 |
| 0 | 1 | 0 | 0 | 0 | 0 |
| 0 | 0 | 0 | 0 | 0 | 0 |
| 0 | 0 | 0 | 0 | 0 | 0 |
| 0 | 0 | 0 | 1 | 0 | 0 |
| 0 | 1 | 0 | 1 | 0 | 0 |

|   |   |   |    |   |   |
|---|---|---|----|---|---|
| 0 | 0 | 1 | 0  | 0 | 0 |
| 0 | 1 | 0 | 0  | 0 | 0 |
| 0 | 0 | 0 | 1  | 0 | 0 |
| 0 | 0 | 0 | 0  | 0 | 0 |
| 0 | 1 | 0 | 0  | 0 | 0 |
| 0 | 0 | 0 | 0  | 0 | 0 |
| 0 | 0 | 0 | 0  | 1 | 0 |
| 0 | 1 | 0 | 0  | 0 | 0 |
| 0 | 0 | 0 | 0  | 0 | 0 |
| 0 | 0 | 0 | 1  | 0 | 0 |
| 0 | 0 | 0 | 1  | 0 | 0 |
| 0 | 0 | 0 | 0  | 0 | 0 |
| 0 | 0 | 0 | 0  | 0 | 0 |
| 0 | 0 | 0 | 0  | 0 | 0 |
| 0 | 0 | 0 | 0  | 0 | 0 |
| 1 | 0 | 0 | 0  | 0 | 0 |
| 0 | 0 | 0 | 0  | 0 | 0 |
| 0 | 0 | 0 | 1  | 0 | 0 |
| 0 | 0 | 0 | 1  | 0 | 0 |
| 1 | 0 | 0 | 1  | 0 | 0 |
| 1 | 0 | 0 | 1  | 0 | 0 |
| 0 | 0 | 0 | 1  | 0 | 0 |
| 0 | 0 | 0 | 1  | 0 | 0 |
| 0 | 0 | 0 | 1  | 0 | 0 |
| 0 | 0 | 0 | 99 | 0 | 0 |
| 0 | 0 | 0 | 0  | 0 | 0 |
| 0 | 0 | 0 | 1  | 1 | 0 |
| 0 | 0 | 0 | 0  | 0 | 0 |
| 0 | 0 | 0 | 0  | 0 | 0 |
| 1 | 0 | 0 | 1  | 0 | 0 |
| 0 | 0 | 0 | 1  | 0 | 0 |
| 0 | 0 | 0 | 0  | 0 | 0 |
| 0 | 0 | 0 | 1  | 0 | 0 |
| 0 | 0 | 0 | 1  | 0 | 0 |
| 0 | 0 | 0 | 0  | 0 | 0 |
| 0 | 0 | 0 | 0  | 0 | 0 |
| 0 | 0 | 0 | 1  | 0 | 0 |
| 0 | 0 | 0 | 0  | 0 | 0 |
| 0 | 0 | 0 | 0  | 0 | 0 |
| 0 | 0 | 0 | 0  | 0 | 0 |
| 0 | 0 | 0 | 0  | 0 | 0 |
| 0 | 0 | 0 | 0  | 0 | 0 |
| 0 | 1 | 0 | 1  | 0 | 0 |
| 0 | 0 | 0 | 1  | 0 | 0 |
| 0 | 0 | 1 | 1  | 0 | 0 |





|   |   |   |   |   |   |
|---|---|---|---|---|---|
| 0 | 0 | 0 | 0 | 0 | 0 |
| 0 | 0 | 0 | 0 | 0 | 0 |
| 0 | 0 | 0 | 0 | 0 | 0 |
| 0 | 0 | 1 | 1 | 0 | 0 |
| 0 | 0 | 0 | 0 | 0 | 0 |
| 0 | 0 | 0 | 0 | 0 | 0 |
| 0 | 1 | 0 | 0 | 0 | 0 |
| 0 | 0 | 0 | 1 | 0 | 0 |
| 0 | 0 | 0 | 1 | 1 | 0 |
| 0 | 0 | 0 | 0 | 0 | 0 |
| 0 | 0 | 1 | 1 | 0 | 0 |
| 0 | 1 | 0 | 0 | 0 | 0 |
| 0 | 0 | 0 | 0 | 0 | 0 |
| 0 | 0 | 0 | 0 | 1 | 0 |
| 0 | 0 | 0 | 0 | 0 | 0 |
| 0 | 0 | 0 | 0 | 0 | 0 |
| 0 | 0 | 0 | 0 | 0 | 0 |
| 0 | 0 | 0 | 0 | 0 | 0 |
| 0 | 0 | 0 | 0 | 0 | 0 |
| 0 | 1 | 0 | 0 | 0 | 0 |
| 0 | 0 | 0 | 0 | 0 | 0 |
| 0 | 0 | 0 | 0 | 0 | 0 |
| 0 | 0 | 0 | 0 | 1 | 0 |
| 0 | 0 | 0 | 0 | 0 | 0 |
| 0 | 0 | 0 | 0 | 0 | 0 |
| 0 | 0 | 0 | 0 | 1 | 0 |
| 0 | 0 | 0 | 0 | 0 | 0 |
| 0 | 0 | 0 | 0 | 0 | 0 |
| 0 | 0 | 0 | 0 | 0 | 0 |
| 0 | 0 | 0 | 0 | 1 | 0 |
| 0 | 0 | 0 | 0 | 0 | 0 |
| 0 | 1 | 0 | 0 | 0 | 1 |
| 0 | 0 | 1 | 0 | 0 | 0 |
| 0 | 0 | 0 | 0 | 0 | 0 |
| 0 | 1 | 0 | 0 | 0 | 0 |
| 0 | 0 | 0 | 0 | 0 | 0 |
| 0 | 0 | 0 | 0 | 0 | 0 |
| 0 | 0 | 0 | 0 | 0 | 0 |
| 0 | 0 | 0 | 0 | 1 | 0 |
| 0 | 0 | 0 | 0 | 1 | 0 |
| 0 | 0 | 0 | 0 | 0 | 0 |
| 0 | 0 | 0 | 0 | 1 | 0 |
| 0 | 0 | 0 | 0 | 0 | 0 |
| 0 | 0 | 0 | 0 | 0 | 0 |
| 0 | 0 | 0 | 0 | 0 | 0 |
| 0 | 0 | 0 | 0 | 0 | 0 |
| 0 | 0 | 0 | 0 | 0 | 0 |

|   |   |   |   |   |   |
|---|---|---|---|---|---|
| 0 | 0 | 1 | 0 | 0 | 0 |
| 0 | 0 | 0 | 1 | 0 | 0 |
| 0 | 0 | 0 | 0 | 1 | 0 |
| 0 | 0 | 0 | 0 | 0 | 0 |
| 0 | 0 | 0 | 1 | 1 | 0 |
| 0 | 0 | 0 | 0 | 0 | 0 |
| 0 | 0 | 0 | 0 | 0 | 0 |
| 0 | 0 | 0 | 0 | 0 | 0 |
| 0 | 0 | 0 | 0 | 0 | 0 |
| 0 | 0 | 0 | 1 | 0 | 0 |
| 1 | 0 | 0 | 0 | 0 | 0 |
| 0 | 0 | 0 | 1 | 0 | 0 |
| 0 | 0 | 0 | 0 | 0 | 0 |
| 0 | 0 | 0 | 0 | 0 | 0 |
| 0 | 0 | 0 | 0 | 0 | 0 |
| 0 | 0 | 0 | 0 | 0 | 0 |
| 0 | 0 | 0 | 0 | 0 | 0 |
| 0 | 1 | 0 | 1 | 0 | 0 |
| 0 | 0 | 1 | 0 | 0 | 0 |
| 0 | 0 | 0 | 0 | 0 | 0 |
| 0 | 0 | 0 | 0 | 0 | 0 |
| 0 | 0 | 0 | 1 | 0 | 0 |
| 0 | 0 | 0 | 0 | 0 | 0 |
| 0 | 0 | 0 | 0 | 0 | 0 |
| 0 | 0 | 0 | 1 | 0 | 0 |
| 0 | 0 | 0 | 0 | 0 | 0 |
| 0 | 0 | 0 | 1 | 0 | 0 |
| 0 | 0 | 0 | 1 | 0 | 0 |
| 0 | 0 | 0 | 1 | 0 | 0 |
| 0 | 0 | 0 | 1 | 0 | 0 |
| 0 | 0 | 0 | 0 | 0 | 0 |
| 0 | 0 | 0 | 1 | 0 | 0 |
| 0 | 0 | 0 | 0 | 0 | 0 |
| 0 | 0 | 0 | 0 | 0 | 0 |
| 0 | 0 | 0 | 1 | 0 | 0 |
| 0 | 0 | 0 | 0 | 0 | 0 |
| 0 | 0 | 0 | 0 | 0 | 0 |
| 0 | 0 | 0 | 1 | 0 | 0 |
| 0 | 0 | 0 | 1 | 1 | 1 |
| 0 | 0 | 0 | 1 | 0 | 0 |
| 0 | 0 | 0 | 0 | 0 | 0 |
| 0 | 0 | 0 | 0 | 0 | 0 |
| 0 | 0 | 0 | 0 | 0 | 0 |
| 0 | 0 | 0 | 1 | 1 | 0 |

|   |   |   |    |   |   |
|---|---|---|----|---|---|
| 0 | 0 | 0 | 1  | 0 | 0 |
| 0 | 0 | 0 | 0  | 0 | 0 |
| 0 | 0 | 0 | 0  | 0 | 0 |
| 1 | 0 | 0 | 1  | 0 | 0 |
| 0 | 1 | 0 | 1  | 0 | 0 |
| 0 | 0 | 1 | 0  | 0 | 0 |
| 0 | 0 | 0 | 0  | 0 | 0 |
| 0 | 0 | 0 | 0  | 0 | 0 |
| 0 | 0 | 0 | 1  | 0 | 0 |
| 0 | 0 | 1 | 0  | 0 | 0 |
| 0 | 0 | 0 | 1  | 0 | 0 |
| 0 | 0 | 0 | 1  | 0 | 0 |
| 0 | 0 | 0 | 99 | 0 | 0 |
| 0 | 0 | 0 | 0  | 0 | 0 |
| 0 | 1 | 0 | 99 | 0 | 0 |
| 0 | 0 | 0 | 1  | 0 | 0 |
| 0 | 0 | 0 | 99 | 0 | 0 |
| 0 | 0 | 1 | 0  | 0 | 0 |
| 0 | 0 | 0 | 1  | 0 | 0 |
| 0 | 0 | 0 | 1  | 0 | 0 |
| 0 | 0 | 0 | 1  | 0 | 0 |
| 0 | 0 | 0 | 1  | 0 | 0 |
| 0 | 0 | 0 | 1  | 0 | 0 |
| 0 | 0 | 0 | 1  | 1 | 0 |
| 0 | 0 | 0 | 1  | 0 | 0 |
| 0 | 0 | 0 | 0  | 0 | 0 |
| 0 | 1 | 0 | 99 | 0 | 0 |
| 0 | 1 | 0 | 1  | 0 | 0 |
| 0 | 1 | 0 | 1  | 0 | 0 |
| 0 | 0 | 0 | 0  | 0 | 0 |
| 0 | 0 | 1 | 1  | 0 | 0 |
| 0 | 0 | 0 | 0  | 0 | 0 |
| 0 | 0 | 0 | 1  | 0 | 0 |
| 0 | 0 | 0 | 0  | 0 | 0 |
| 0 | 0 | 0 | 0  | 0 | 0 |
| 0 | 0 | 0 | 0  | 0 | 0 |
| 0 | 0 | 0 | 0  | 0 | 0 |
| 1 | 0 | 0 | 0  | 0 | 0 |
| 0 | 0 | 0 | 0  | 0 | 0 |
| 0 | 1 | 0 | 0  | 0 | 0 |
| 0 | 0 | 1 | 0  | 0 | 0 |
| 0 | 0 | 0 | 1  | 0 | 0 |
| 0 | 0 | 0 | 0  | 0 | 0 |
| 0 | 0 | 1 | 0  | 1 | 0 |
| 0 | 0 | 0 | 1  | 0 | 0 |
| 0 | 0 | 0 | 1  | 1 | 0 |
| 0 | 0 | 0 | 1  | 0 | 0 |
| 0 | 0 | 0 | 1  | 0 | 0 |
| 0 | 0 | 0 | 1  | 0 | 0 |
| 0 | 0 | 0 | 1  | 0 | 0 |
| 0 | 0 | 0 | 0  | 0 | 0 |

|   |   |   |    |   |   |
|---|---|---|----|---|---|
| 0 | 0 | 0 | 1  | 0 | 0 |
| 0 | 0 | 0 | 1  | 0 | 0 |
| 0 | 1 | 0 | 0  | 0 | 0 |
| 0 | 0 | 0 | 0  | 0 | 0 |
| 0 | 0 | 0 | 0  | 0 | 0 |
| 0 | 0 | 1 | 0  | 0 | 0 |
| 0 | 0 | 0 | 99 | 0 | 0 |
| 0 | 0 | 0 | 1  | 0 | 0 |
| 0 | 0 | 0 | 1  | 0 | 0 |
| 0 | 0 | 0 | 1  | 0 | 0 |
| 0 | 0 | 0 | 99 | 0 | 0 |
| 0 | 0 | 0 | 1  | 0 | 0 |
| 0 | 0 | 0 | 0  | 0 | 0 |
| 0 | 0 | 0 | 0  | 0 | 0 |
| 0 | 0 | 0 | 1  | 0 | 0 |
| 0 | 0 | 0 | 0  | 0 | 0 |
| 0 | 0 | 0 | 1  | 0 | 0 |
| 0 | 0 | 0 | 0  | 0 | 0 |
| 0 | 0 | 0 | 1  | 0 | 0 |
| 0 | 0 | 0 | 1  | 0 | 0 |
| 0 | 1 | 0 | 0  | 0 | 0 |
| 0 | 0 | 1 | 0  | 0 | 0 |
| 0 | 0 | 0 | 0  | 0 | 0 |
| 0 | 1 | 0 | 0  | 0 | 0 |
| 0 | 1 | 0 | 0  | 0 | 0 |
| 0 | 0 | 0 | 0  | 0 | 0 |
| 0 | 0 | 0 | 1  | 0 | 0 |
| 0 | 0 | 0 | 1  | 0 | 0 |
| 0 | 0 | 0 | 0  | 0 | 0 |
| 0 | 0 | 0 | 1  | 0 | 0 |
| 0 | 0 | 0 | 99 | 0 | 0 |
| 0 | 0 | 0 | 1  | 0 | 0 |
| 0 | 0 | 0 | 1  | 0 | 0 |
| 0 | 0 | 0 | 0  | 0 | 0 |
| 0 | 0 | 0 | 0  | 0 | 0 |
| 0 | 0 | 0 | 1  | 0 | 0 |
| 0 | 0 | 1 | 99 | 0 | 0 |
| 0 | 0 | 0 | 0  | 0 | 0 |
| 0 | 0 | 0 | 1  | 0 | 0 |
| 0 | 0 | 0 | 0  | 0 | 0 |
| 0 | 0 | 0 | 0  | 0 | 0 |
| 0 | 0 | 0 | 0  | 0 | 0 |
| 0 | 0 | 0 | 0  | 0 | 0 |
| 0 | 0 | 0 | 1  | 0 | 0 |
| 0 | 0 | 0 | 0  | 0 | 0 |
| 0 | 0 | 0 | 0  | 0 | 0 |
| 0 | 0 | 0 | 1  | 1 | 0 |
| 0 | 0 | 0 | 1  | 0 | 0 |



|   |   |   |    |   |   |
|---|---|---|----|---|---|
| 0 | 0 | 1 | 99 | 0 | 0 |
| 0 | 0 | 1 | 0  | 0 | 0 |
| 0 | 0 | 0 | 1  | 0 | 0 |
| 0 | 0 | 0 | 99 | 0 | 0 |
| 0 | 0 | 0 | 0  | 0 | 0 |
| 0 | 0 | 0 | 0  | 0 | 0 |
| 0 | 0 | 1 | 0  | 0 | 0 |
| 0 | 0 | 0 | 0  | 0 | 0 |
| 0 | 0 | 0 | 0  | 0 | 0 |
| 0 | 0 | 0 | 0  | 0 | 0 |
| 0 | 0 | 0 | 0  | 0 | 0 |
| 0 | 0 | 0 | 0  | 0 | 0 |
| 0 | 0 | 0 | 0  | 0 | 0 |
| 0 | 0 | 0 | 0  | 0 | 0 |
| 0 | 0 | 0 | 1  | 0 | 0 |
| 0 | 0 | 0 | 1  | 0 | 0 |
| 0 | 0 | 0 | 1  | 0 | 0 |
| 0 | 0 | 0 | 0  | 0 | 0 |
| 0 | 0 | 0 | 1  | 0 | 0 |
| 0 | 0 | 0 | 1  | 0 | 0 |
| 0 | 0 | 0 | 1  | 0 | 0 |
| 0 | 0 | 0 | 1  | 0 | 0 |
| 0 | 0 | 0 | 1  | 0 | 0 |
| 0 | 0 | 0 | 1  | 0 | 0 |
| 0 | 0 | 0 | 0  | 0 | 0 |
| 0 | 0 | 0 | 1  | 0 | 0 |
| 0 | 0 | 0 | 1  | 0 | 0 |
| 0 | 0 | 0 | 1  | 0 | 0 |
| 0 | 0 | 0 | 1  | 0 | 0 |
| 0 | 0 | 0 | 1  | 0 | 0 |
| 0 | 0 | 0 | 0  | 0 | 0 |
| 0 | 1 | 0 | 1  | 0 | 0 |
| 0 | 0 | 1 | 1  | 0 | 1 |
| 0 | 0 | 0 | 1  | 1 | 0 |
| 0 | 0 | 0 | 0  | 0 | 0 |
| 1 | 0 | 0 | 1  | 0 | 0 |
| 0 | 0 | 1 | 1  | 0 | 0 |
| 0 | 1 | 0 | 0  | 0 | 0 |
| 0 | 0 | 0 | 1  | 0 | 0 |

|   |   |   |    |   |   |
|---|---|---|----|---|---|
| 0 | 1 | 0 | 1  | 0 | 0 |
| 0 | 0 | 0 | 1  | 0 | 0 |
| 0 | 1 | 0 | 1  | 0 | 0 |
| 0 | 0 | 0 | 0  | 1 | 0 |
| 0 | 0 | 0 | 1  | 0 | 0 |
| 0 | 1 | 0 | 1  | 0 | 0 |
| 0 | 0 | 0 | 1  | 0 | 0 |
| 0 | 0 | 0 | 1  | 0 | 0 |
| 0 | 0 | 0 | 0  | 0 | 0 |
| 0 | 0 | 0 | 0  | 0 | 0 |
| 0 | 0 | 0 | 1  | 0 | 0 |
| 0 | 0 | 0 | 0  | 0 | 0 |
| 0 | 0 | 0 | 1  | 0 | 0 |
| 0 | 0 | 0 | 1  | 0 | 0 |
| 0 | 0 | 0 | 1  | 0 | 0 |
| 0 | 0 | 0 | 0  | 0 | 0 |
| 0 | 1 | 0 | 0  | 0 | 0 |
| 0 | 0 | 0 | 0  | 0 | 0 |
| 0 | 0 | 0 | 1  | 0 | 0 |
| 0 | 0 | 0 | 1  | 0 | 0 |
| 0 | 0 | 0 | 1  | 0 | 0 |
| 0 | 0 | 0 | 0  | 0 | 0 |
| 0 | 0 | 0 | 0  | 0 | 0 |
| 0 | 0 | 0 | 0  | 0 | 0 |
| 0 | 1 | 0 | 0  | 0 | 0 |
| 0 | 0 | 0 | 1  | 0 | 0 |
| 0 | 0 | 0 | 1  | 0 | 0 |
| 0 | 0 | 0 | 0  | 1 | 0 |
| 0 | 0 | 0 | 1  | 0 | 0 |
| 0 | 0 | 0 | 1  | 0 | 0 |
| 0 | 0 | 0 | 0  | 1 | 0 |
| 0 | 0 | 0 | 1  | 0 | 0 |
| 0 | 0 | 0 | 1  | 0 | 0 |
| 0 | 0 | 1 | 1  | 0 | 0 |
| 0 | 0 | 0 | 0  | 0 | 0 |
| 0 | 1 | 0 | 99 | 0 | 0 |
| 0 | 0 | 1 | 1  | 0 | 0 |
| 0 | 0 | 0 | 1  | 0 | 0 |
| 0 | 0 | 0 | 0  | 0 | 0 |
| 0 | 0 | 0 | 1  | 0 | 0 |
| 0 | 0 | 0 | 1  | 0 | 0 |
| 1 | 0 | 0 | 0  | 0 | 0 |
| 0 | 1 | 0 | 0  | 0 | 0 |
| 0 | 0 | 0 | 1  | 0 | 0 |
| 0 | 0 | 0 | 0  | 0 | 0 |

|   |   |   |    |   |   |
|---|---|---|----|---|---|
| 0 | 0 | 1 | 0  | 0 | 0 |
| 0 | 0 | 0 | 0  | 0 | 0 |
| 0 | 0 | 0 | 0  | 0 | 0 |
| 0 | 0 | 0 | 1  | 0 | 0 |
| 0 | 0 | 0 | 1  | 0 | 0 |
| 0 | 0 | 0 | 1  | 0 | 0 |
| 0 | 0 | 0 | 1  | 0 | 0 |
| 0 | 1 | 0 | 0  | 0 | 0 |
| 0 | 0 | 0 | 1  | 0 | 0 |
| 0 | 0 | 0 | 0  | 0 | 0 |
| 0 | 0 | 0 | 0  | 0 | 0 |
| 0 | 0 | 0 | 1  | 0 | 0 |
| 0 | 0 | 0 | 0  | 0 | 0 |
| 0 | 0 | 0 | 0  | 0 | 0 |
| 0 | 0 | 0 | 1  | 1 | 0 |
| 0 | 1 | 0 | 0  | 0 | 0 |
| 0 | 0 | 0 | 1  | 0 | 0 |
| 0 | 0 | 0 | 1  | 0 | 0 |
| 0 | 0 | 0 | 1  | 0 | 0 |
| 0 | 0 | 0 | 1  | 0 | 0 |
| 0 | 0 | 0 | 0  | 0 | 0 |
| 0 | 1 | 0 | 0  | 0 | 0 |
| 0 | 0 | 0 | 1  | 0 | 0 |
| 0 | 0 | 0 | 1  | 0 | 0 |
| 0 | 0 | 0 | 0  | 0 | 0 |
| 0 | 1 | 0 | 0  | 0 | 0 |
| 0 | 0 | 0 | 99 | 0 | 1 |
| 0 | 0 | 1 | 0  | 0 | 0 |
| 0 | 1 | 0 | 1  | 0 | 0 |
| 0 | 0 | 0 | 99 | 0 | 0 |
| 1 | 0 | 0 | 0  | 0 | 0 |
| 0 | 0 | 0 | 1  | 0 | 0 |
| 0 | 0 | 0 | 99 | 0 | 0 |
| 0 | 1 | 0 | 99 | 0 | 0 |
| 0 | 0 | 1 | 99 | 0 | 0 |
| 0 | 1 | 0 | 1  | 0 | 0 |
| 0 | 0 | 0 | 0  | 0 | 0 |
| 0 | 1 | 0 | 0  | 0 | 0 |
| 0 | 0 | 0 | 0  | 0 | 0 |
| 0 | 0 | 0 | 99 | 0 | 0 |
| 0 | 0 | 0 | 0  | 0 | 0 |
| 0 | 0 | 0 | 1  | 0 | 0 |
| 0 | 0 | 0 | 0  | 0 | 0 |
| 0 | 0 | 0 | 0  | 0 | 0 |
| 0 | 0 | 0 | 0  | 0 | 0 |
| 0 | 0 | 0 | 1  | 0 | 0 |
| 0 | 0 | 0 | 0  | 0 | 0 |
| 0 | 0 | 0 | 0  | 0 | 0 |



|   |   |   |    |   |   |
|---|---|---|----|---|---|
| 0 | 0 | 1 | 0  | 0 | 0 |
| 0 | 0 | 0 | 1  | 0 | 0 |
| 0 | 0 | 0 | 0  | 0 | 0 |
| 1 | 0 | 0 | 1  | 0 | 0 |
| 0 | 1 | 0 | 0  | 0 | 0 |
| 0 | 1 | 0 | 1  | 0 | 0 |
| 0 | 1 | 0 | 0  | 0 | 0 |
| 0 | 1 | 0 | 1  | 0 | 0 |
| 0 | 0 | 0 | 99 | 0 | 0 |
| 0 | 0 | 0 | 0  | 0 | 0 |
| 0 | 0 | 0 | 0  | 0 | 0 |
| 0 | 1 | 0 | 1  | 0 | 0 |
| 0 | 0 | 0 | 1  | 0 | 0 |
| 0 | 0 | 0 | 0  | 0 | 0 |
| 0 | 0 | 0 | 0  | 0 | 0 |
| 0 | 0 | 0 | 0  | 0 | 0 |
| 0 | 0 | 0 | 0  | 0 | 0 |
| 0 | 0 | 0 | 1  | 0 | 0 |
| 0 | 0 | 0 | 0  | 0 | 0 |
| 0 | 0 | 0 | 1  | 0 | 0 |
| 0 | 0 | 0 | 1  | 0 | 0 |
| 0 | 0 | 0 | 99 | 0 | 0 |
| 0 | 0 | 0 | 0  | 1 | 0 |
| 0 | 0 | 0 | 1  | 0 | 0 |
| 0 | 0 | 0 | 1  | 0 | 0 |
| 0 | 0 | 0 | 99 | 0 | 0 |
| 0 | 0 | 0 | 0  | 0 | 0 |
| 0 | 0 | 0 | 1  | 0 | 0 |
| 0 | 0 | 0 | 0  | 0 | 0 |
| 0 | 0 | 0 | 0  | 0 | 0 |
| 0 | 0 | 0 | 0  | 0 | 0 |
| 0 | 0 | 0 | 1  | 0 | 0 |
| 0 | 0 | 0 | 1  | 0 | 0 |
| 0 | 0 | 0 | 1  | 1 | 0 |
| 0 | 1 | 0 | 1  | 0 | 0 |
| 0 | 0 | 0 | 1  | 0 | 0 |
| 0 | 1 | 0 | 99 | 0 | 0 |
| 0 | 0 | 0 | 0  | 0 | 0 |
| 0 | 0 | 0 | 0  | 0 | 0 |
| 0 | 0 | 0 | 0  | 0 | 0 |
| 0 | 0 | 0 | 0  | 0 | 0 |
| 0 | 0 | 0 | 0  | 0 | 0 |
| 0 | 0 | 0 | 1  | 0 | 0 |
| 0 | 0 | 0 | 1  | 0 | 0 |
| 0 | 0 | 0 | 0  | 0 | 0 |
| 0 | 0 | 0 | 1  | 1 | 0 |
| 0 | 0 | 0 | 0  | 0 | 0 |
| 0 | 0 | 0 | 0  | 0 | 0 |
| 0 | 0 | 0 | 1  | 0 | 0 |

|   |   |   |    |   |   |
|---|---|---|----|---|---|
| 0 | 0 | 0 | 1  | 0 | 0 |
| 0 | 0 | 0 | 1  | 0 | 0 |
| 0 | 0 | 0 | 0  | 0 | 0 |
| 0 | 0 | 0 | 1  | 0 | 0 |
| 0 | 0 | 0 | 1  | 0 | 0 |
| 0 | 0 | 0 | 1  | 0 | 0 |
| 0 | 0 | 0 | 1  | 0 | 0 |
| 0 | 0 | 0 | 0  | 0 | 0 |
| 0 | 0 | 1 | 0  | 0 | 0 |
| 0 | 0 | 0 | 0  | 0 | 0 |
| 0 | 0 | 0 | 0  | 0 | 0 |
| 0 | 0 | 0 | 0  | 0 | 0 |
| 0 | 1 | 0 | 0  | 0 | 0 |
| 0 | 0 | 0 | 0  | 0 | 0 |
| 0 | 0 | 1 | 0  | 0 | 0 |
| 0 | 0 | 0 | 0  | 1 | 0 |
| 0 | 0 | 0 | 0  | 0 | 0 |
| 1 | 0 | 0 | 1  | 0 | 0 |
| 0 | 1 | 0 | 99 | 0 | 0 |
| 0 | 0 | 0 | 0  | 1 | 0 |
| 0 | 0 | 0 | 0  | 0 | 0 |
| 0 | 0 | 0 | 99 | 0 | 0 |
| 0 | 0 | 0 | 0  | 0 | 0 |
| 0 | 1 | 0 | 1  | 0 | 0 |
| 0 | 0 | 1 | 99 | 0 | 0 |
| 0 | 1 | 0 | 1  | 1 | 0 |
| 0 | 0 | 1 | 1  | 1 | 0 |
| 0 | 0 | 0 | 0  | 0 | 0 |
| 0 | 1 | 0 | 0  | 0 | 0 |
| 0 | 0 | 0 | 0  | 0 | 0 |
| 0 | 0 | 0 | 0  | 0 | 0 |
| 0 | 0 | 0 | 0  | 0 | 0 |
| 0 | 0 | 0 | 0  | 0 | 0 |
| 0 | 0 | 0 | 0  | 0 | 0 |
| 0 | 0 | 0 | 0  | 0 | 0 |
| 0 | 1 | 0 | 0  | 0 | 0 |
| 0 | 0 | 0 | 99 | 0 | 0 |
| 0 | 0 | 0 | 0  | 0 | 0 |
| 0 | 0 | 0 | 0  | 0 | 0 |
| 0 | 0 | 0 | 0  | 0 | 0 |
| 0 | 0 | 0 | 1  | 0 | 0 |
| 0 | 0 | 0 | 1  | 0 | 0 |
| 0 | 0 | 0 | 99 | 0 | 0 |
| 0 | 0 | 0 | 1  | 0 | 0 |
| 0 | 0 | 0 | 1  | 0 | 0 |
| 0 | 0 | 0 | 0  | 0 | 0 |
| 1 | 0 | 0 | 0  | 0 | 0 |
| 0 | 0 | 0 | 0  | 0 | 0 |





|   |   |   |    |   |   |
|---|---|---|----|---|---|
| 0 | 0 | 0 | 99 | 0 | 0 |
| 0 | 0 | 0 | 0  | 0 | 0 |
| 0 | 0 | 0 | 1  | 0 | 0 |
| 0 | 1 | 0 | 0  | 0 | 0 |
| 0 | 0 | 0 | 0  | 0 | 0 |
| 0 | 0 | 0 | 0  | 0 | 0 |
| 0 | 0 | 0 | 0  | 0 | 0 |
| 1 | 0 | 0 | 1  | 0 | 0 |
| 0 | 0 | 0 | 1  | 0 | 0 |
| 0 | 0 | 0 | 1  | 0 | 0 |
| 0 | 0 | 0 | 0  | 0 | 0 |
| 0 | 0 | 0 | 0  | 0 | 0 |
| 0 | 0 | 0 | 0  | 0 | 0 |
| 0 | 0 | 0 | 1  | 0 | 0 |
| 0 | 0 | 0 | 1  | 1 | 0 |
| 0 | 0 | 0 | 1  | 1 | 0 |
| 0 | 0 | 0 | 0  | 0 | 0 |
| 0 | 0 | 0 | 0  | 1 | 0 |
| 0 | 0 | 0 | 0  | 0 | 0 |
| 0 | 0 | 0 | 0  | 0 | 0 |
| 0 | 0 | 0 | 0  | 0 | 0 |
| 0 | 0 | 0 | 0  | 0 | 0 |
| 0 | 0 | 0 | 1  | 0 | 0 |
| 0 | 0 | 0 | 0  | 0 | 0 |
| 0 | 0 | 0 | 0  | 0 | 0 |
| 0 | 0 | 0 | 1  | 1 | 0 |
| 0 | 0 | 0 | 1  | 0 | 0 |
| 0 | 0 | 0 | 0  | 0 | 0 |
| 0 | 0 | 0 | 1  | 0 | 0 |
| 0 | 0 | 0 | 1  | 0 | 0 |
| 0 | 0 | 0 | 1  | 0 | 0 |
| 0 | 0 | 0 | 0  | 0 | 0 |
| 0 | 0 | 0 | 1  | 0 | 0 |
| 0 | 0 | 0 | 1  | 0 | 0 |
| 0 | 0 | 0 | 1  | 0 | 0 |
| 0 | 0 | 0 | 0  | 0 | 0 |
| 0 | 0 | 1 | 0  | 0 | 0 |
| 0 | 0 | 0 | 1  | 0 | 0 |
| 1 | 0 | 0 | 1  | 0 | 0 |
| 0 | 1 | 0 | 0  | 0 | 0 |
| 0 | 0 | 0 | 1  | 0 | 0 |
| 0 | 0 | 0 | 1  | 0 | 0 |
| 0 | 0 | 0 | 0  | 0 | 0 |
| 0 | 0 | 0 | 1  | 0 | 0 |
| 0 | 0 | 0 | 1  | 0 | 0 |
| 0 | 0 | 0 | 0  | 0 | 0 |
| 0 | 0 | 0 | 0  | 0 | 0 |

|   |   |   |    |   |   |
|---|---|---|----|---|---|
| 0 | 0 | 0 | 1  | 0 | 0 |
| 0 | 0 | 0 | 0  | 1 | 0 |
| 0 | 0 | 1 | 99 | 0 | 0 |
| 0 | 0 | 0 | 1  | 1 | 0 |
| 0 | 0 | 0 | 0  | 0 | 0 |
| 0 | 1 | 0 | 0  | 0 | 0 |
| 0 | 0 | 0 | 1  | 0 | 0 |
| 0 | 0 | 0 | 0  | 1 | 0 |
| 0 | 0 | 0 | 1  | 0 | 0 |
| 0 | 1 | 0 | 99 | 0 | 0 |
| 0 | 1 | 0 | 1  | 1 | 0 |
| 0 | 0 | 0 | 1  | 0 | 0 |
| 0 | 1 | 0 | 0  | 1 | 0 |
| 0 | 0 | 0 | 0  | 0 | 0 |
| 0 | 0 | 0 | 1  | 0 | 1 |
| 0 | 0 | 0 | 1  | 0 | 0 |
| 0 | 0 | 0 | 0  | 0 | 0 |
| 0 | 0 | 0 | 1  | 0 | 0 |
| 0 | 0 | 0 | 0  | 0 | 0 |
| 0 | 0 | 0 | 1  | 0 | 0 |
| 0 | 0 | 0 | 1  | 0 | 0 |
| 0 | 0 | 0 | 1  | 0 | 0 |
| 0 | 0 | 0 | 0  | 0 | 0 |
| 0 | 0 | 0 | 1  | 0 | 0 |
| 0 | 0 | 0 | 0  | 0 | 0 |
| 0 | 0 | 0 | 1  | 0 | 0 |
| 0 | 0 | 0 | 0  | 0 | 0 |
| 0 | 0 | 0 | 1  | 0 | 0 |
| 0 | 0 | 0 | 0  | 0 | 0 |
| 0 | 0 | 0 | 1  | 0 | 0 |
| 0 | 0 | 0 | 1  | 0 | 0 |
| 0 | 0 | 0 | 0  | 0 | 0 |
| 0 | 0 | 0 | 1  | 0 | 0 |
| 0 | 0 | 0 | 0  | 0 | 0 |
| 0 | 0 | 0 | 1  | 0 | 0 |
| 0 | 0 | 0 | 0  | 0 | 0 |
| 0 | 0 | 0 | 1  | 0 | 0 |
| 0 | 0 | 0 | 1  | 1 | 0 |
| 0 | 0 | 0 | 1  | 0 | 0 |
| 0 | 0 | 0 | 1  | 0 | 0 |
| 0 | 0 | 0 | 0  | 0 | 0 |
| 0 | 0 | 0 | 1  | 0 | 0 |
| 0 | 0 | 0 | 99 | 0 | 0 |
| 0 | 0 | 0 | 0  | 0 | 0 |
| 0 | 0 | 0 | 0  | 0 | 0 |

|   |   |   |   |   |   |
|---|---|---|---|---|---|
| 0 | 0 | 0 | 1 | 0 | 0 |
| 0 | 0 | 0 | 0 | 0 | 0 |
| 0 | 0 | 0 | 1 | 0 | 0 |
| 0 | 0 | 0 | 1 | 0 | 0 |
| 0 | 0 | 0 | 0 | 0 | 0 |
| 0 | 0 | 0 | 0 | 0 | 0 |
| 0 | 0 | 0 | 1 | 0 | 0 |
| 0 | 0 | 0 | 1 | 0 | 0 |
| 0 | 0 | 0 | 1 | 0 | 0 |
| 0 | 0 | 0 | 1 | 0 | 0 |
| 0 | 0 | 0 | 0 | 0 | 0 |
| 0 | 0 | 0 | 1 | 0 | 0 |
| 0 | 0 | 0 | 1 | 0 | 0 |
| 0 | 0 | 0 | 0 | 0 | 0 |
| 0 | 0 | 0 | 1 | 0 | 0 |
| 0 | 0 | 0 | 1 | 0 | 0 |
| 0 | 0 | 0 | 0 | 0 | 0 |
| 0 | 0 | 0 | 0 | 0 | 0 |
| 0 | 0 | 0 | 0 | 0 | 0 |
| 0 | 0 | 0 | 1 | 0 | 0 |
| 0 | 0 | 0 | 0 | 0 | 0 |
| 0 | 0 | 0 | 1 | 1 | 0 |
| 0 | 0 | 0 | 1 | 0 | 0 |
| 0 | 0 | 0 | 1 | 1 | 0 |
| 0 | 0 | 0 | 0 | 1 | 0 |
| 0 | 0 | 0 | 1 | 0 | 0 |
| 0 | 0 | 0 | 0 | 0 | 0 |
| 0 | 0 | 0 | 0 | 0 | 0 |
| 0 | 0 | 0 | 1 | 0 | 0 |
| 0 | 0 | 0 | 1 | 0 | 0 |
| 0 | 0 | 1 | 0 | 0 | 0 |
| 0 | 0 | 0 | 1 | 1 | 0 |
| 0 | 0 | 0 | 1 | 0 | 0 |
| 0 | 0 | 0 | 0 | 0 | 0 |
| 0 | 0 | 0 | 1 | 0 | 0 |
| 0 | 0 | 0 | 1 | 0 | 0 |
| 0 | 0 | 0 | 1 | 1 | 0 |
| 0 | 0 | 0 | 0 | 0 | 0 |
| 0 | 0 | 0 | 0 | 0 | 0 |
| 0 | 0 | 0 | 1 | 0 | 0 |
| 0 | 0 | 0 | 0 | 0 | 0 |
| 0 | 0 | 0 | 1 | 0 | 0 |
| 0 | 1 | 0 | 0 | 0 | 0 |
| 0 | 0 | 0 | 1 | 1 | 0 |
| 0 | 0 | 0 | 1 | 0 | 0 |







|   |   |        |   |   |   |
|---|---|--------|---|---|---|
| 0 | 0 | #NULL! | 1 | 0 | 0 |
| 0 | 0 | #NULL! | 0 | 0 | 0 |
| 0 | 1 | #NULL! | 0 | 0 | 0 |
| 0 | 1 | #NULL! | 0 | 0 | 0 |
| 0 | 0 | #NULL! | 0 | 1 | 0 |
| 0 | 0 | #NULL! | 0 | 1 | 0 |
| 0 | 0 | #NULL! | 0 | 0 | 0 |
| 0 | 0 | #NULL! | 0 | 0 | 0 |
| 0 | 1 | #NULL! | 0 | 0 | 0 |
| 0 | 0 | #NULL! | 1 | 0 | 0 |
| 0 | 1 | #NULL! | 0 | 0 | 0 |
| 0 | 0 | #NULL! | 1 | 0 | 0 |
| 0 | 0 | #NULL! | 1 | 0 | 0 |
| 0 | 1 | #NULL! | 0 | 0 | 0 |
| 0 | 0 | #NULL! | 0 | 0 | 0 |
| 0 | 0 | #NULL! | 1 | 0 | 0 |
| 0 | 0 | #NULL! | 1 | 0 | 0 |
| 0 | 0 | #NULL! | 1 | 0 | 0 |
| 0 | 0 | #NULL! | 1 | 0 | 0 |
| 0 | 0 | #NULL! | 1 | 0 | 0 |
| 0 | 0 | #NULL! | 1 | 0 | 0 |
| 0 | 1 | #NULL! | 1 | 0 | 0 |
| 0 | 1 | #NULL! | 1 | 0 | 0 |
| 0 | 0 | #NULL! | 0 | 0 | 0 |
| 0 | 1 | #NULL! | 0 | 0 | 0 |
| 0 | 0 | #NULL! | 1 | 0 | 0 |
| 0 | 1 | #NULL! | 1 | 0 | 0 |
| 0 | 0 | #NULL! | 1 | 0 | 0 |
| 0 | 0 | #NULL! | 0 | 0 | 0 |
| 0 | 1 | #NULL! | 0 | 0 | 0 |
| 0 | 1 | #NULL! | 1 | 0 | 0 |
| 0 | 0 | #NULL! | 0 | 0 | 0 |
| 0 | 0 | #NULL! | 1 | 0 | 0 |
| 0 | 0 | #NULL! | 0 | 0 | 0 |
| 0 | 0 | #NULL! | 1 | 0 | 0 |
| 0 | 0 | #NULL! | 1 | 0 | 0 |
| 0 | 1 | #NULL! | 0 | 0 | 0 |
| 0 | 0 | #NULL! | 1 | 0 | 0 |
| 0 | 0 | #NULL! | 1 | 0 | 0 |
| 0 | 0 | #NULL! | 0 | 0 | 0 |
| 0 | 0 | #NULL! | 0 | 0 | 0 |
| 0 | 0 | #NULL! | 0 | 0 | 0 |
| 0 | 0 | #NULL! | 1 | 0 | 0 |
| 0 | 0 | #NULL! | 1 | 0 | 0 |

|   |   |        |        |   |   |
|---|---|--------|--------|---|---|
| 0 | 0 | #NULL! | 0      | 0 | 0 |
| 0 | 0 | #NULL! | 1      | 0 | 0 |
| 0 | 0 | #NULL! | 0      | 0 | 0 |
| 0 | 0 | #NULL! | 1      | 0 | 0 |
| 0 | 0 | #NULL! | 1      | 0 | 0 |
| 0 | 0 | #NULL! | 1      | 0 | 0 |
| 0 | 1 | #NULL! | 1      | 0 | 0 |
| 0 | 0 | #NULL! | 1      | 0 | 0 |
| 0 | 0 | #NULL! | 1      | 0 | 0 |
| 0 | 0 | #NULL! | 1      | 0 | 0 |
| 0 | 0 | #NULL! | 0      | 0 | 0 |
| 0 | 0 | #NULL! | 0      | 0 | 0 |
| 0 | 0 | #NULL! | #NULL! | 0 | 0 |
| 0 | 0 | #NULL! | 1      | 0 | 0 |
| 0 | 0 | #NULL! | 1      | 0 | 0 |
| 0 | 0 | #NULL! | 1      | 0 | 0 |
| 0 | 0 | #NULL! | 1      | 0 | 0 |
| 0 | 0 | #NULL! | 0      | 0 | 0 |
| 0 | 0 | #NULL! | 0      | 0 | 0 |
| 0 | 0 | #NULL! | 0      | 1 | 0 |
| 0 | 0 | #NULL! | 1      | 0 | 0 |
| 0 | 0 | #NULL! | 1      | 0 | 0 |

| race_pre__3 | race_pre__4 | race_pre__5 | race_pre__6 | race_pre__99 | race_other_pre |
|-------------|-------------|-------------|-------------|--------------|----------------|
| 0           | 0           | 0           | 1           | 0            |                |
| 0           | 0           | 0           | 0           | 0            |                |
| 0           | 1           | 0           | 0           | 0            |                |
| 0           | 1           | 0           | 0           | 0            |                |
| 0           | 1           | 0           | 0           | 0            |                |
| 0           | 0           | 0           | 0           | 1            |                |
| 0           | 0           | 0           | 1           | 0            |                |
| 0           | 0           | 0           | 1           | 0            |                |
| 0           | 0           | 0           | 0           | 0            | 1              |
| 0           | 1           | 1           | 0           | 0            | 0              |
| 0           | 1           | 0           | 0           | 0            | 0              |
| 0           | 1           | 0           | 0           | 0            | 0              |
| 0           | 0           | 0           | 1           | 0            | 0              |
| 0           | 1           | 0           | 0           | 0            | 0              |
| 0           | 0           | 0           | 1           | 0            | 0              |
| 0           | 0           | 0           | 1           | 0            | 0              |
| 0           | 0           | 0           | 0           | 0            | 1              |
| 0           | 0           | 0           | 1           | 0            | 0              |
| 0           | 0           | 0           | 1           | 0            | 0              |
| 0           | 0           | 0           | 0           | 0            | 1              |
| 0           | 0           | 0           | 0           | 1            | 0              |
| 0           | 0           | 0           | 0           | 0            | 1              |
| 0           | 0           | 0           | 0           | 0            | 1              |
| 0           | 0           | 0           | 0           | 0            | 1              |
| 0           | 1           | 0           | 1           | 0            | 0              |
| 0           | 0           | 0           | 1           | 0            | 0              |
| 0           | 0           | 0           | 1           | 0            | 0              |
| 0           | 0           | 0           | 1           | 0            | 0              |
| 0           | 0           | 1           | 0           | 0            | 0              |
| 0           | 0           | 0           | 1           | 0            | 0              |
| 0           | 0           | 0           | 1           | 0            | 0              |
| 0           | 0           | 0           | 0           | 0            | 1              |
| 0           | 0           | 0           | 0           | 0            | 1              |
| 0           | 0           | 0           | 1           | 0            | 0              |
| 0           | 0           | 0           | 0           | 0            | 1              |
| 0           | 0           | 0           | 1           | 0            | 0              |
| 0           | 1           | 0           | 1           | 0            | 0              |
| 0           | 0           | 0           | 1           | 0            | 0              |
| 0           | 1           | 0           | 1           | 0            | 0              |
| 0           | 1           | 0           | 0           | 0            | 0              |
| 0           | 1           | 0           | 0           | 0            | 0              |
| 0           | 1           | 0           | 0           | 0            | 0              |
| 0           | 1           | 0           | 0           | 0            | 0              |

|   |   |   |   |   |
|---|---|---|---|---|
| 0 | 0 | 0 | 1 | 0 |
| 0 | 1 | 0 | 0 | 0 |
| 0 | 0 | 0 | 1 | 0 |
| 0 | 1 | 0 | 0 | 0 |
| 0 | 0 | 0 | 0 | 0 |
| 0 | 1 | 0 | 0 | 0 |
| 0 | 1 | 0 | 0 | 0 |
| 0 | 0 | 0 | 1 | 0 |
| 0 | 0 | 0 | 1 | 0 |
| 0 | 1 | 0 | 0 | 0 |
| 0 | 1 | 0 | 0 | 0 |
| 0 | 0 | 1 | 0 | 0 |
| 0 | 1 | 0 | 0 | 0 |
| 0 | 1 | 0 | 0 | 0 |
| 0 | 0 | 0 | 1 | 0 |
| 0 | 1 | 0 | 0 | 0 |
| 0 | 1 | 0 | 0 | 0 |
| 0 | 0 | 0 | 0 | 0 |
| 0 | 1 | 0 | 0 | 0 |
| 0 | 1 | 0 | 0 | 0 |
| 0 | 0 | 0 | 1 | 0 |
| 0 | 1 | 0 | 0 | 0 |
| 0 | 1 | 0 | 0 | 0 |
| 0 | 0 | 0 | 1 | 0 |
| 0 | 0 | 0 | 1 | 0 |
| 0 | 0 | 0 | 1 | 0 |
| 0 | 1 | 0 | 0 | 0 |
| 0 | 0 | 0 | 1 | 0 |
| 0 | 0 | 0 | 0 | 1 |
| 0 | 0 | 0 | 1 | 0 |
| 0 | 0 | 0 | 1 | 0 |
| 0 | 1 | 0 | 0 | 0 |
| 0 | 1 | 0 | 0 | 0 |
| 0 | 0 | 0 | 0 | 1 |

|   |   |   |   |   |
|---|---|---|---|---|
| 0 | 1 | 0 | 0 | 0 |
| 0 | 0 | 0 | 1 | 0 |
| 0 | 0 | 0 | 1 | 0 |
| 1 | 0 | 0 | 0 | 0 |
| 0 | 0 | 0 | 0 | 1 |
| 0 | 1 | 0 | 0 | 0 |
| 0 | 1 | 0 | 1 | 0 |
| 0 | 1 | 0 | 0 | 0 |
| 0 | 0 | 0 | 1 | 0 |
| 0 | 1 | 0 | 0 | 0 |
| 0 | 0 | 0 | 1 | 0 |
| 0 | 1 | 0 | 0 | 0 |
| 0 | 1 | 0 | 0 | 0 |
| 0 | 1 | 0 | 0 | 0 |
| 0 | 0 | 0 | 0 | 1 |
| 0 | 1 | 0 | 0 | 0 |
| 0 | 0 | 0 | 1 | 0 |
| 0 | 0 | 0 | 0 | 0 |
| 0 | 0 | 0 | 1 | 0 |
| 0 | 1 | 0 | 0 | 0 |
| 0 | 0 | 0 | 0 | 1 |
| 0 | 0 | 0 | 1 | 0 |
| 0 | 0 | 0 | 1 | 0 |
| 0 | 0 | 0 | 0 | 1 |
| 0 | 0 | 1 | 0 | 0 |
| 0 | 0 | 0 | 1 | 0 |
| 0 | 1 | 0 | 0 | 0 |
| 0 | 0 | 0 | 1 | 0 |
| 0 | 0 | 0 | 1 | 0 |
| 0 | 0 | 0 | 0 | 0 |
| 1 | 0 | 0 | 0 | 0 |
| 0 | 1 | 0 | 0 | 0 |
| 0 | 1 | 0 | 0 | 0 |
| 0 | 0 | 0 | 0 | 0 |
| 0 | 1 | 0 | 0 | 0 |
| 0 | 1 | 0 | 0 | 0 |
| 0 | 1 | 0 | 0 | 0 |
| 0 | 1 | 0 | 0 | 0 |
| 0 | 1 | 0 | 0 | 0 |
| 0 | 0 | 0 | 0 | 1 |



|   |   |   |   |   |
|---|---|---|---|---|
| 0 | 0 | 0 | 0 | 1 |
| 0 | 1 | 0 | 0 | 0 |
| 0 | 1 | 0 | 0 | 0 |
| 0 | 0 | 0 | 1 | 0 |
| 0 | 1 | 0 | 0 | 0 |
| 0 | 1 | 0 | 0 | 0 |
| 0 | 1 | 0 | 1 | 0 |
| 0 | 1 | 0 | 0 | 0 |
| 0 | 0 | 0 | 1 | 0 |
| 0 | 1 | 0 | 0 | 0 |
| 0 | 1 | 0 | 0 | 0 |
| 0 | 0 | 0 | 0 | 0 |
| 0 | 1 | 0 | 0 | 0 |
| 0 | 1 | 0 | 0 | 0 |
| 0 | 0 | 0 | 1 | 0 |
| 0 | 1 | 0 | 0 | 0 |
| 0 | 0 | 0 | 0 | 0 |
| 0 | 0 | 0 | 1 | 0 |
| 0 | 0 | 0 | 0 | 0 |
| 0 | 0 | 0 | 1 | 0 |
| 0 | 0 | 0 | 0 | 0 |
| 0 | 1 | 0 | 0 | 0 |
| 0 | 0 | 0 | 0 | 0 |
| 0 | 0 | 0 | 0 | 0 |
| 0 | 0 | 0 | 1 | 0 |
| 0 | 0 | 0 | 1 | 0 |
| 0 | 0 | 0 | 1 | 0 |
| 0 | 1 | 0 | 0 | 0 |
| 0 | 1 | 0 | 0 | 0 |
| 0 | 0 | 0 | 1 | 0 |
| 0 | 0 | 0 | 1 | 0 |
| 0 | 0 | 0 | 1 | 0 |
| 0 | 1 | 0 | 0 | 0 |
| 0 | 1 | 0 | 0 | 0 |
| 0 | 0 | 0 | 1 | 0 |
| 0 | 0 | 0 | 0 | 0 |
| 0 | 1 | 0 | 0 | 0 |
| 0 | 1 | 0 | 0 | 0 |
| 0 | 0 | 0 | 1 | 0 |
| 0 | 0 | 0 | 0 | 0 |
| 0 | 1 | 0 | 0 | 0 |
| 0 | 1 | 0 | 0 | 0 |
| 0 | 0 | 0 | 0 | 1 |



|   |   |   |   |   |
|---|---|---|---|---|
| 0 | 1 | 0 | 0 | 0 |
| 0 | 0 | 0 | 1 | 0 |
| 0 | 1 | 0 | 0 | 0 |
| 0 | 0 | 0 | 1 | 0 |
| 0 | 1 | 0 | 0 | 0 |
| 0 | 0 | 0 | 1 | 0 |
| 0 | 1 | 0 | 0 | 0 |
| 0 | 0 | 0 | 0 | 1 |
| 0 | 1 | 0 | 0 | 0 |
| 0 | 0 | 0 | 0 | 1 |
| 0 | 1 | 0 | 0 | 0 |
| 0 | 0 | 0 | 1 | 0 |
| 0 | 0 | 0 | 1 | 0 |
| 0 | 0 | 0 | 0 | 0 |
| 0 | 0 | 0 | 1 | 0 |
| 0 | 1 | 0 | 0 | 0 |
| 0 | 0 | 0 | 0 | 1 |
| 0 | 1 | 0 | 0 | 0 |
| 0 | 0 | 0 | 1 | 0 |
| 0 | 0 | 0 | 0 | 0 |
| 0 | 0 | 0 | 1 | 0 |
| 0 | 0 | 0 | 0 | 1 |
| 0 | 0 | 0 | 0 | 1 |
| 0 | 1 | 0 | 0 | 0 |
| 0 | 1 | 0 | 0 | 0 |
| 0 | 0 | 0 | 1 | 0 |
| 0 | 0 | 0 | 1 | 0 |
| 0 | 0 | 0 | 1 | 0 |
| 0 | 0 | 0 | 1 | 0 |
| 0 | 0 | 0 | 1 | 0 |
| 0 | 0 | 0 | 1 | 0 |
| 0 | 0 | 1 | 0 | 0 |
| 0 | 0 | 0 | 1 | 0 |
| 0 | 0 | 0 | 0 | 0 |
| 0 | 0 | 0 | 1 | 0 |
| 0 | 0 | 0 | 1 | 0 |
| 0 | 0 | 0 | 1 | 0 |
| 0 | 0 | 1 | 0 | 0 |
| 0 | 0 | 0 | 1 | 0 |
| 0 | 0 | 0 | 0 | 0 |
| 0 | 1 | 0 | 0 | 0 |
| 0 | 1 | 0 | 1 | 0 |

|   |   |   |   |   |
|---|---|---|---|---|
| 0 | 0 | 0 | 1 | 0 |
| 0 | 1 | 0 | 0 | 0 |
| 0 | 1 | 0 | 0 | 0 |
| 0 | 0 | 0 | 0 | 1 |
| 0 | 1 | 0 | 0 | 0 |
| 0 | 0 | 0 | 0 | 0 |
| 0 | 1 | 0 | 0 | 0 |
| 0 | 1 | 0 | 0 | 0 |
| 0 | 0 | 0 | 1 | 0 |
| 0 | 0 | 0 | 1 | 0 |
| 0 | 0 | 0 | 1 | 0 |
| 0 | 1 | 0 | 0 | 0 |
| 0 | 1 | 0 | 0 | 0 |
| 0 | 0 | 0 | 1 | 0 |
| 0 | 0 | 0 | 1 | 0 |
| 0 | 0 | 0 | 1 | 0 |
| 0 | 1 | 0 | 0 | 0 |
| 0 | 1 | 0 | 0 | 0 |
| 0 | 0 | 0 | 1 | 0 |
| 0 | 0 | 0 | 0 | 1 |
| 0 | 1 | 0 | 0 | 0 |
| 0 | 0 | 0 | 0 | 1 |
| 0 | 0 | 0 | 0 | 0 |
| 0 | 0 | 0 | 1 | 0 |
| 0 | 1 | 0 | 0 | 0 |
| 0 | 0 | 0 | 0 | 1 |
| 0 | 0 | 0 | 0 | 0 |
| 0 | 0 | 0 | 1 | 0 |
| 0 | 0 | 0 | 1 | 0 |
| 0 | 0 | 0 | 0 | 1 |
| 0 | 0 | 0 | 1 | 0 |
| 0 | 0 | 0 | 1 | 0 |
| 0 | 1 | 0 | 0 | 0 |
| 0 | 0 | 0 | 1 | 0 |
| 0 | 0 | 0 | 1 | 0 |
| 0 | 0 | 0 | 0 | 1 |

|   |   |   |   |   |
|---|---|---|---|---|
| 0 | 0 | 0 | 1 | 0 |
| 0 | 0 | 0 | 1 | 0 |
| 0 | 0 | 0 | 1 | 0 |
| 0 | 1 | 0 | 0 | 0 |
| 0 | 0 | 0 | 1 | 0 |
| 0 | 0 | 0 | 0 | 1 |
| 0 | 0 | 0 | 1 | 0 |
| 0 | 1 | 0 | 0 | 0 |
| 0 | 1 | 0 | 0 | 0 |
| 0 | 0 | 0 | 0 | 1 |
| 0 | 0 | 1 | 0 | 0 |
| 0 | 0 | 0 | 0 | 0 |
| 0 | 0 | 0 | 1 | 0 |
| 0 | 0 | 0 | 0 | 0 |
| 0 | 0 | 0 | 1 | 0 |
| 0 | 0 | 0 | 1 | 0 |
| 0 | 0 | 0 | 0 | 0 |
| 0 | 0 | 0 | 1 | 0 |
| 0 | 0 | 0 | 1 | 0 |
| 0 | 0 | 0 | 0 | 1 |
| 0 | 0 | 0 | 1 | 0 |
| 0 | 1 | 0 | 0 | 0 |
| 0 | 0 | 1 | 0 | 0 |
| 0 | 1 | 0 | 0 | 0 |
| 0 | 1 | 0 | 0 | 0 |
| 0 | 0 | 0 | 0 | 0 |
| 0 | 1 | 0 | 0 | 0 |
| 0 | 1 | 0 | 0 | 0 |
| 0 | 1 | 0 | 0 | 0 |
| 0 | 0 | 0 | 1 | 0 |
| 0 | 1 | 0 | 0 | 0 |
| 0 | 0 | 0 | 0 | 1 |
| 0 | 1 | 0 | 0 | 0 |
| 0 | 1 | 0 | 0 | 0 |
| 0 | 0 | 0 | 1 | 0 |
| 0 | 1 | 0 | 0 | 0 |
| 0 | 0 | 0 | 1 | 0 |
| 0 | 0 | 0 | 0 | 0 |
| 0 | 1 | 0 | 0 | 0 |
| 0 | 1 | 0 | 0 | 0 |
| 0 | 0 | 0 | 1 | 0 |
| 0 | 1 | 0 | 0 | 0 |
| 0 | 0 | 0 | 0 | 0 |
| 0 | 1 | 0 | 0 | 0 |
| 0 | 1 | 0 | 0 | 0 |
| 0 | 0 | 0 | 1 | 0 |

|   |   |   |   |   |
|---|---|---|---|---|
| 0 | 1 | 0 | 0 | 0 |
| 0 | 1 | 0 | 0 | 0 |
| 0 | 0 | 0 | 1 | 0 |
| 0 | 0 | 0 | 1 | 0 |
| 0 | 1 | 0 | 0 | 0 |
| 0 | 1 | 0 | 0 | 0 |
| 0 | 1 | 0 | 0 | 0 |
| 0 | 0 | 0 | 1 | 0 |
| 0 | 1 | 0 | 0 | 0 |
| 0 | 1 | 0 | 0 | 0 |
| 0 | 1 | 0 | 0 | 0 |
| 0 | 0 | 0 | 0 | 1 |
| 0 | 0 | 0 | 1 | 0 |
| 0 | 1 | 0 | 0 | 0 |
| 0 | 1 | 0 | 0 | 0 |
| 0 | 1 | 0 | 0 | 0 |
| 0 | 0 | 0 | 1 | 0 |
| 0 | 1 | 0 | 0 | 0 |
| 0 | 0 | 0 | 1 | 0 |
| 0 | 1 | 0 | 0 | 0 |
| 0 | 1 | 0 | 0 | 0 |
| 0 | 0 | 0 | 1 | 0 |
| 0 | 0 | 0 | 0 | 1 |
| 0 | 0 | 0 | 1 | 0 |
| 0 | 1 | 0 | 0 | 0 |
| 0 | 1 | 0 | 0 | 0 |
| 0 | 0 | 0 | 1 | 0 |
| 0 | 0 | 0 | 1 | 0 |
| 0 | 1 | 0 | 0 | 0 |
| 0 | 0 | 0 | 1 | 0 |
| 0 | 1 | 0 | 1 | 0 |
| 0 | 0 | 0 | 1 | 0 |
| 0 | 1 | 0 | 0 | 0 |
| 0 | 1 | 0 | 0 | 0 |
| 0 | 1 | 0 | 1 | 0 |
| 0 | 1 | 0 | 0 | 0 |
| 0 | 0 | 1 | 0 | 0 |

|   |   |   |   |   |
|---|---|---|---|---|
| 0 | 0 | 0 | 1 | 0 |
| 0 | 1 | 0 | 0 | 0 |
| 0 | 0 | 0 | 1 | 0 |
| 0 | 0 | 0 | 1 | 0 |
| 0 | 0 | 0 | 0 | 1 |
| 0 | 0 | 0 | 1 | 0 |
| 0 | 0 | 0 | 0 | 0 |
| 0 | 0 | 0 | 1 | 0 |
| 0 | 1 | 0 | 0 | 0 |
| 0 | 0 | 0 | 0 | 1 |
| 0 | 1 | 0 | 0 | 0 |
| 0 | 0 | 0 | 0 | 0 |
| 0 | 0 | 0 | 1 | 0 |
| 0 | 1 | 0 | 0 | 0 |
| 0 | 1 | 0 | 0 | 1 |
| 0 | 0 | 0 | 0 | 0 |
| 0 | 0 | 0 | 1 | 0 |
| 0 | 1 | 0 | 0 | 0 |
| 0 | 0 | 0 | 0 | 0 |
| 0 | 1 | 0 | 0 | 0 |
| 0 | 0 | 0 | 1 | 0 |
| 0 | 0 | 0 | 0 | 1 |
| 0 | 0 | 0 | 1 | 0 |
| 0 | 0 | 0 | 0 | 0 |
| 0 | 1 | 0 | 0 | 0 |
| 0 | 1 | 0 | 0 | 0 |
| 0 | 0 | 0 | 0 | 0 |
| 0 | 0 | 0 | 0 | 0 |
| 0 | 0 | 0 | 0 | 0 |
| 0 | 1 | 0 | 0 | 0 |
| 0 | 0 | 0 | 0 | 0 |
| 0 | 0 | 0 | 1 | 0 |
| 0 | 0 | 0 | 0 | 0 |
| 0 | 0 | 0 | 0 | 0 |
| 0 | 1 | 0 | 0 | 0 |
| 0 | 0 | 0 | 0 | 0 |
| 0 | 0 | 0 | 0 | 1 |
| 0 | 0 | 0 | 0 | 0 |
| 0 | 0 | 0 | 0 | 1 |
| 0 | 0 | 0 | 1 | 0 |

|   |   |   |   |   |
|---|---|---|---|---|
| 0 | 0 | 0 | 0 | 1 |
| 0 | 0 | 0 | 1 | 0 |
| 0 | 0 | 0 | 1 | 0 |
| 0 | 0 | 0 | 1 | 0 |
| 0 | 1 | 0 | 0 | 0 |
| 0 | 1 | 0 | 0 | 0 |
| 0 | 1 | 0 | 0 | 0 |
| 0 | 0 | 1 | 0 | 0 |
| 0 | 1 | 0 | 0 | 0 |
| 0 | 1 | 0 | 0 | 0 |
| 0 | 0 | 1 | 0 | 0 |
| 0 | 0 | 1 | 0 | 0 |
| 0 | 0 | 0 | 1 | 0 |
| 0 | 1 | 0 | 0 | 0 |
| 0 | 0 | 0 | 0 | 1 |
| 0 | 0 | 0 | 1 | 0 |
| 0 | 0 | 0 | 1 | 0 |
| 0 | 0 | 0 | 1 | 0 |
| 0 | 0 | 0 | 0 | 0 |
| 0 | 0 | 0 | 1 | 0 |
| 0 | 0 | 0 | 0 | 1 |
| 0 | 1 | 0 | 0 | 0 |
| 0 | 1 | 1 | 1 | 0 |
| 0 | 0 | 0 | 1 | 0 |
| 0 | 1 | 0 | 0 | 0 |
| 0 | 0 | 0 | 1 | 0 |
| 0 | 0 | 0 | 0 | 0 |
| 0 | 0 | 0 | 0 | 0 |
| 0 | 1 | 0 | 0 | 0 |
| 0 | 1 | 0 | 0 | 0 |
| 0 | 0 | 0 | 0 | 0 |
| 0 | 0 | 0 | 0 | 0 |
| 0 | 1 | 0 | 0 | 0 |
| 0 | 0 | 0 | 0 | 0 |
| 0 | 0 | 0 | 0 | 0 |
| 0 | 0 | 0 | 1 | 0 |
| 0 | 0 | 0 | 1 | 0 |
| 0 | 0 | 0 | 1 | 0 |
| 0 | 0 | 0 | 0 | 1 |
| 0 | 0 | 0 | 1 | 0 |
| 0 | 1 | 0 | 0 | 0 |
| 0 | 0 | 0 | 1 | 0 |
| 0 | 1 | 1 | 0 | 0 |
| 0 | 1 | 0 | 0 | 0 |
| 0 | 0 | 0 | 0 | 1 |
| 0 | 0 | 0 | 1 | 0 |

|   |   |   |   |   |
|---|---|---|---|---|
| 0 | 0 | 0 | 1 | 0 |
| 0 | 0 | 0 | 1 | 0 |
| 0 | 0 | 0 | 1 | 0 |
| 0 | 1 | 0 | 0 | 0 |
| 0 | 1 | 0 | 0 | 0 |
| 0 | 1 | 0 | 0 | 0 |
| 0 | 0 | 0 | 1 | 0 |
| 0 | 1 | 1 | 0 | 0 |
| 0 | 1 | 0 | 0 | 0 |
| 0 | 0 | 0 | 1 | 0 |
| 0 | 0 | 0 | 1 | 0 |
| 0 | 1 | 0 | 0 | 0 |
| 0 | 1 | 0 | 0 | 0 |
| 0 | 0 | 0 | 1 | 0 |
| 0 | 0 | 0 | 1 | 0 |
| 0 | 1 | 0 | 0 | 1 |
| 0 | 0 | 0 | 0 | 0 |
| 0 | 1 | 0 | 0 | 0 |
| 0 | 0 | 0 | 1 | 0 |
| 0 | 0 | 0 | 1 | 0 |
| 0 | 1 | 1 | 0 | 0 |
| 0 | 0 | 0 | 1 | 0 |
| 0 | 0 | 0 | 0 | 1 |
| 0 | 0 | 0 | 0 | 0 |
| 0 | 1 | 0 | 0 | 0 |
| 0 | 0 | 0 | 1 | 0 |
| 0 | 0 | 0 | 0 | 0 |
| 0 | 1 | 0 | 0 | 0 |
| 0 | 0 | 0 | 1 | 0 |
| 0 | 0 | 1 | 0 | 0 |
| 0 | 1 | 0 | 0 | 1 |
| 0 | 0 | 0 | 0 | 1 |
| 0 | 0 | 0 | 1 | 0 |
| 0 | 1 | 0 | 0 | 0 |
| 0 | 0 | 0 | 1 | 0 |
| 0 | 1 | 0 | 0 | 0 |
| 0 | 0 | 0 | 1 | 0 |
| 0 | 0 | 0 | 0 | 1 |
| 0 | 0 | 0 | 1 | 0 |

|   |   |   |   |   |
|---|---|---|---|---|
| 0 | 0 | 0 | 0 | 1 |
| 0 | 1 | 0 | 0 | 0 |
| 0 | 0 | 0 | 1 | 0 |
| 0 | 0 | 0 | 1 | 0 |
| 0 | 0 | 0 | 1 | 0 |
| 0 | 0 | 0 | 0 | 1 |
| 0 | 0 | 0 | 1 | 0 |
| 0 | 0 | 0 | 0 | 1 |
| 0 | 0 | 0 | 0 | 1 |
| 0 | 0 | 0 | 1 | 0 |
| 0 | 1 | 0 | 0 | 0 |
| 0 | 1 | 0 | 0 | 0 |
| 0 | 0 | 0 | 1 | 0 |
| 0 | 1 | 0 | 0 | 0 |
| 0 | 1 | 0 | 0 | 0 |
| 0 | 1 | 0 | 0 | 0 |
| 0 | 1 | 0 | 0 | 0 |
| 0 | 1 | 0 | 0 | 0 |
| 0 | 1 | 0 | 0 | 0 |
| 0 | 0 | 0 | 0 | 0 |
| 0 | 0 | 0 | 1 | 0 |
| 0 | 0 | 0 | 0 | 1 |
| 0 | 0 | 0 | 0 | 0 |
| 0 | 0 | 0 | 0 | 1 |
| 0 | 0 | 0 | 0 | 1 |
| 0 | 0 | 0 | 0 | 1 |
| 0 | 0 | 0 | 1 | 0 |
| 0 | 0 | 0 | 0 | 0 |
| 0 | 0 | 0 | 0 | 0 |
| 0 | 1 | 0 | 0 | 0 |
| 0 | 0 | 0 | 0 | 0 |
| 0 | 1 | 0 | 0 | 0 |
| 0 | 0 | 0 | 1 | 0 |
| 0 | 0 | 1 | 0 | 0 |
| 0 | 1 | 0 | 0 | 0 |
| 0 | 0 | 0 | 1 | 0 |
| 0 | 1 | 0 | 0 | 0 |
| 0 | 1 | 0 | 0 | 0 |
| 0 | 0 | 0 | 1 | 0 |



|   |   |   |   |   |
|---|---|---|---|---|
| 0 | 0 | 0 | 1 | 0 |
| 0 | 0 | 0 | 1 | 0 |
| 0 | 0 | 0 | 1 | 0 |
| 0 | 0 | 0 | 1 | 0 |
| 0 | 1 | 0 | 0 | 0 |
| 0 | 0 | 0 | 1 | 0 |
| 0 | 0 | 0 | 1 | 0 |
| 0 | 1 | 0 | 0 | 0 |
| 0 | 1 | 0 | 0 | 0 |
| 0 | 1 | 0 | 0 | 0 |
| 0 | 1 | 0 | 0 | 0 |
| 1 | 0 | 0 | 0 | 0 |
| 0 | 1 | 0 | 0 | 0 |
| 0 | 1 | 0 | 0 | 0 |
| 0 | 0 | 1 | 0 | 0 |
| 0 | 1 | 0 | 0 | 0 |
| 0 | 1 | 0 | 0 | 0 |
| 0 | 0 | 0 | 0 | 0 |
| 0 | 1 | 0 | 0 | 0 |
| 0 | 1 | 0 | 0 | 0 |
| 0 | 0 | 0 | 1 | 0 |
| 0 | 0 | 0 | 0 | 0 |
| 0 | 0 | 0 | 1 | 0 |
| 0 | 0 | 0 | 1 | 0 |
| 0 | 1 | 0 | 0 | 0 |
| 0 | 0 | 0 | 0 | 1 |
| 0 | 0 | 0 | 1 | 0 |
| 0 | 0 | 0 | 1 | 0 |
| 0 | 1 | 0 | 0 | 0 |
| 0 | 0 | 0 | 0 | 0 |
| 0 | 0 | 0 | 0 | 0 |
| 0 | 1 | 0 | 0 | 0 |
| 0 | 1 | 0 | 0 | 0 |
| 0 | 1 | 0 | 0 | 0 |
| 0 | 0 | 0 | 0 | 0 |
| 0 | 0 | 0 | 0 | 0 |
| 0 | 0 | 0 | 1 | 0 |
| 0 | 0 | 0 | 0 | 1 |
| 0 | 1 | 0 | 0 | 0 |
| 0 | 1 | 0 | 0 | 0 |
| 0 | 1 | 0 | 0 | 0 |
| 0 | 1 | 0 | 0 | 0 |
| 0 | 0 | 0 | 0 | 1 |
| 0 | 0 | 0 | 1 | 0 |
| 0 | 0 | 0 | 1 | 0 |
| 0 | 1 | 0 | 0 | 0 |



|   |   |   |   |   |
|---|---|---|---|---|
| 0 | 1 | 0 | 0 | 0 |
| 0 | 0 | 0 | 1 | 0 |
| 0 | 1 | 0 | 0 | 0 |
| 0 | 0 | 0 | 0 | 1 |
| 0 | 0 | 0 | 0 | 1 |
| 0 | 1 | 0 | 0 | 0 |
| 0 | 1 | 0 | 0 | 0 |
| 0 | 0 | 1 | 0 | 0 |
| 0 | 0 | 0 | 1 | 0 |
| 0 | 0 | 0 | 1 | 0 |
| 0 | 0 | 0 | 0 | 1 |
| 0 | 1 | 0 | 0 | 0 |
| 0 | 0 | 0 | 1 | 0 |
| 0 | 0 | 0 | 0 | 1 |
| 0 | 1 | 0 | 0 | 0 |
| 0 | 0 | 0 | 0 | 1 |
| 0 | 1 | 0 | 0 | 0 |
| 0 | 0 | 0 | 0 | 1 |
| 0 | 1 | 0 | 0 | 0 |
| 0 | 0 | 0 | 0 | 1 |
| 0 | 0 | 0 | 0 | 1 |
| 0 | 0 | 0 | 0 | 1 |
| 0 | 1 | 0 | 0 | 0 |
| 0 | 0 | 0 | 0 | 1 |
| 0 | 0 | 0 | 0 | 1 |
| 0 | 0 | 0 | 0 | 1 |
| 0 | 0 | 0 | 0 | 1 |
| 0 | 0 | 0 | 0 | 1 |
| 0 | 0 | 0 | 0 | 1 |
| 0 | 0 | 0 | 0 | 1 |
| 0 | 0 | 0 | 0 | 1 |
| 0 | 0 | 0 | 0 | 0 |
| 0 | 0 | 0 | 0 | 1 |
| 0 | 0 | 0 | 1 | 0 |
| 0 | 0 | 0 | 0 | 1 |
| 0 | 0 | 0 | 1 | 0 |

|   |   |   |   |   |
|---|---|---|---|---|
| 0 | 0 | 0 | 1 | 0 |
| 0 | 0 | 0 | 0 | 1 |
| 0 | 1 | 0 | 0 | 0 |
| 0 | 0 | 0 | 0 | 1 |
| 0 | 1 | 0 | 0 | 0 |
| 0 | 0 | 0 | 0 | 1 |
| 0 | 0 | 0 | 0 | 1 |
| 0 | 1 | 0 | 0 | 0 |
| 0 | 1 | 0 | 0 | 0 |
| 0 | 0 | 0 | 0 | 1 |
| 0 | 1 | 0 | 0 | 0 |
| 0 | 0 | 0 | 0 | 1 |
| 0 | 1 | 0 | 0 | 0 |
| 0 | 0 | 0 | 1 | 0 |
| 0 | 0 | 0 | 1 | 0 |
| 0 | 1 | 0 | 0 | 0 |
| 0 | 0 | 0 | 0 | 0 |
| 0 | 1 | 0 | 0 | 0 |
| 0 | 1 | 1 | 0 | 0 |
| 0 | 1 | 0 | 0 | 0 |
| 0 | 0 | 0 | 1 | 0 |
| 0 | 0 | 0 | 0 | 0 |
| 0 | 0 | 0 | 0 | 0 |
| 0 | 0 | 0 | 0 | 1 |
| 1 | 0 | 0 | 0 | 0 |
| 0 | 0 | 0 | 1 | 0 |
| 0 | 1 | 0 | 0 | 0 |
| 0 | 0 | 0 | 1 | 0 |
| 0 | 1 | 0 | 0 | 0 |
| 0 | 0 | 0 | 1 | 0 |
| 0 | 0 | 0 | 1 | 0 |
| 0 | 0 | 1 | 0 | 0 |
| 0 | 0 | 1 | 0 | 0 |
| 0 | 1 | 0 | 0 | 0 |
| 0 | 0 | 0 | 1 | 0 |
| 0 | 0 | 0 | 0 | 0 |
| 0 | 0 | 0 | 0 | 0 |
| 0 | 1 | 1 | 0 | 0 |
| 0 | 0 | 0 | 0 | 0 |
| 0 | 0 | 0 | 0 | 0 |
| 0 | 0 | 0 | 1 | 0 |

|   |   |   |   |   |
|---|---|---|---|---|
| 0 | 0 | 0 | 1 | 0 |
| 0 | 1 | 0 | 0 | 0 |
| 0 | 1 | 0 | 0 | 0 |
| 0 | 1 | 0 | 0 | 0 |
| 0 | 1 | 0 | 0 | 0 |
| 0 | 0 | 0 | 1 | 0 |
| 0 | 0 | 0 | 0 | 1 |
| 0 | 0 | 0 | 1 | 0 |
| 0 | 0 | 0 | 0 | 0 |
| 0 | 0 | 0 | 1 | 0 |
| 0 | 1 | 0 | 0 | 0 |
| 0 | 1 | 0 | 1 | 0 |
| 0 | 1 | 0 | 1 | 0 |
| 0 | 1 | 0 | 0 | 0 |
| 0 | 0 | 0 | 0 | 1 |
| 0 | 0 | 0 | 1 | 0 |
| 0 | 0 | 0 | 0 | 0 |
| 0 | 0 | 0 | 1 | 0 |
| 0 | 0 | 0 | 1 | 0 |
| 0 | 0 | 0 | 0 | 1 |
| 0 | 0 | 0 | 1 | 0 |
| 0 | 0 | 0 | 0 | 1 |
| 0 | 0 | 0 | 0 | 1 |
| 0 | 0 | 0 | 0 | 1 |
| 0 | 0 | 0 | 0 | 1 |
| 0 | 1 | 0 | 0 | 0 |
| 0 | 1 | 0 | 0 | 0 |
| 0 | 0 | 0 | 0 | 1 |
| 0 | 0 | 0 | 0 | 1 |
| 0 | 0 | 0 | 0 | 1 |
| 0 | 0 | 0 | 0 | 1 |
| 0 | 1 | 0 | 0 | 0 |
| 0 | 1 | 0 | 0 | 0 |
| 0 | 0 | 0 | 0 | 1 |
| 0 | 0 | 0 | 1 | 0 |
| 0 | 0 | 0 | 0 | 0 |
| 0 | 0 | 0 | 0 | 1 |
| 0 | 1 | 0 | 0 | 0 |
| 0 | 0 | 0 | 0 | 1 |
| 0 | 0 | 0 | 0 | 1 |
| 0 | 0 | 0 | 1 | 0 |
| 0 | 0 | 0 | 0 | 1 |
| 0 | 0 | 0 | 1 | 0 |
| 0 | 0 | 0 | 0 | 1 |
| 0 | 0 | 0 | 1 | 0 |

|   |   |   |   |   |
|---|---|---|---|---|
| 0 | 1 | 0 | 0 | 0 |
| 0 | 0 | 0 | 1 | 0 |
| 0 | 0 | 0 | 0 | 1 |
| 0 | 1 | 0 | 0 | 0 |
| 0 | 1 | 0 | 0 | 0 |
| 0 | 0 | 0 | 0 | 1 |
| 0 | 0 | 0 | 0 | 1 |
| 0 | 0 | 0 | 1 | 0 |
| 0 | 1 | 0 | 0 | 0 |
| 0 | 0 | 0 | 0 | 1 |
| 0 | 1 | 0 | 0 | 0 |
| 0 | 0 | 0 | 0 | 1 |
| 0 | 1 | 0 | 0 | 0 |
| 0 | 1 | 1 | 0 | 0 |
| 0 | 0 | 0 | 0 | 0 |
| 0 | 0 | 0 | 0 | 1 |
| 0 | 0 | 0 | 1 | 0 |
| 0 | 0 | 0 | 0 | 0 |
| 0 | 0 | 0 | 0 | 0 |
| 0 | 1 | 0 | 0 | 0 |
| 0 | 1 | 0 | 0 | 1 |
| 0 | 0 | 0 | 0 | 0 |
| 0 | 0 | 0 | 0 | 1 |
| 0 | 0 | 0 | 0 | 1 |
| 0 | 0 | 0 | 0 | 0 |
| 0 | 0 | 0 | 1 | 0 |
| 0 | 1 | 0 | 0 | 0 |
| 0 | 1 | 0 | 0 | 0 |
| 0 | 0 | 0 | 1 | 0 |
| 0 | 1 | 0 | 0 | 0 |
| 0 | 0 | 0 | 0 | 1 |
| 0 | 1 | 0 | 0 | 0 |
| 0 | 0 | 1 | 0 | 0 |
| 0 | 0 | 0 | 0 | 1 |
| 0 | 1 | 0 | 0 | 1 |
| 0 | 0 | 0 | 0 | 1 |
| 1 | 1 | 1 | 1 | 0 |
| 0 | 0 | 0 | 1 | 0 |
| 0 | 0 | 0 | 0 | 1 |



|   |   |   |   |   |
|---|---|---|---|---|
| 0 | 1 | 0 | 0 | 0 |
| 0 | 0 | 0 | 0 | 1 |
| 0 | 1 | 0 | 0 | 0 |
| 0 | 1 | 0 | 0 | 0 |
| 0 | 0 | 0 | 0 | 1 |
| 0 | 0 | 0 | 0 | 1 |
| 0 | 0 | 0 | 0 | 1 |
| 0 | 0 | 0 | 0 | 1 |
| 0 | 0 | 0 | 1 | 0 |
| 0 | 0 | 0 | 1 | 0 |
| 0 | 0 | 0 | 0 | 0 |
| 0 | 1 | 0 | 0 | 0 |
| 0 | 1 | 0 | 0 | 0 |
| 0 | 1 | 0 | 0 | 0 |
| 0 | 1 | 0 | 0 | 0 |
| 0 | 1 | 0 | 0 | 0 |
| 0 | 1 | 0 | 1 | 0 |
| 0 | 1 | 0 | 0 | 0 |
| 0 | 0 | 0 | 0 | 0 |
| 0 | 0 | 0 | 0 | 1 |
| 0 | 1 | 0 | 0 | 0 |
| 0 | 1 | 0 | 0 | 0 |
| 0 | 0 | 0 | 0 | 0 |
| 0 | 0 | 0 | 0 | 1 |
| 0 | 0 | 0 | 0 | 0 |
| 0 | 0 | 0 | 0 | 0 |
| 0 | 0 | 0 | 0 | 0 |
| 0 | 1 | 0 | 0 | 0 |
| 0 | 0 | 0 | 1 | 0 |
| 0 | 0 | 0 | 1 | 0 |
| 0 | 0 | 0 | 0 | 0 |
| 0 | 0 | 0 | 0 | 0 |
| 0 | 0 | 0 | 1 | 0 |
| 0 | 0 | 0 | 0 | 1 |
| 0 | 1 | 0 | 0 | 0 |
| 0 | 0 | 0 | 1 | 0 |
| 0 | 0 | 0 | 1 | 0 |
| 0 | 1 | 0 | 0 | 0 |
| 0 | 0 | 0 | 0 | 0 |
| 0 | 1 | 0 | 0 | 0 |



|   |   |   |   |   |
|---|---|---|---|---|
| 0 | 1 | 0 | 1 | 0 |
| 0 | 0 | 0 | 1 | 0 |
| 0 | 0 | 1 | 0 | 0 |
| 0 | 0 | 0 | 0 | 1 |
| 0 | 1 | 0 | 0 | 0 |
| 0 | 1 | 0 | 0 | 0 |
| 0 | 0 | 0 | 0 | 1 |
| 0 | 1 | 0 | 0 | 0 |
| 0 | 0 | 0 | 0 | 1 |
| 0 | 0 | 0 | 0 | 1 |
| 0 | 0 | 0 | 0 | 1 |
| 0 | 1 | 0 | 1 | 0 |
| 0 | 1 | 0 | 0 | 0 |
| 0 | 1 | 0 | 0 | 0 |
| 0 | 1 | 0 | 0 | 0 |
| 0 | 1 | 0 | 0 | 0 |
| 0 | 1 | 0 | 0 | 0 |
| 0 | 0 | 1 | 0 | 0 |
| 0 | 1 | 0 | 0 | 0 |
| 0 | 1 | 0 | 0 | 0 |
| 0 | 1 | 0 | 0 | 0 |
| 0 | 1 | 0 | 0 | 0 |
| 0 | 1 | 0 | 0 | 0 |
| 0 | 0 | 0 | 0 | 1 |
| 0 | 1 | 0 | 0 | 0 |
| 0 | 1 | 0 | 0 | 0 |
| 0 | 1 | 0 | 0 | 0 |
| 0 | 1 | 0 | 0 | 0 |
| 0 | 0 | 0 | 0 | 1 |
| 0 | 0 | 0 | 0 | 0 |
| 0 | 1 | 0 | 0 | 0 |
| 0 | 1 | 0 | 0 | 0 |
| 0 | 1 | 0 | 0 | 0 |
| 0 | 0 | 0 | 0 | 1 |
| 0 | 0 | 0 | 0 | 0 |
| 0 | 1 | 0 | 0 | 0 |
| 0 | 1 | 0 | 0 | 0 |
| 0 | 1 | 0 | 0 | 0 |

|   |   |   |   |   |
|---|---|---|---|---|
| 0 | 0 | 0 | 1 | 0 |
| 0 | 0 | 0 | 1 | 0 |
| 0 | 0 | 0 | 0 | 1 |
| 0 | 0 | 0 | 0 | 0 |
| 0 | 1 | 0 | 0 | 0 |
| 0 | 0 | 0 | 0 | 1 |
| 0 | 1 | 1 | 0 | 0 |
| 0 | 0 | 0 | 1 | 0 |
| 0 | 1 | 0 | 0 | 0 |
| 0 | 0 | 0 | 0 | 0 |
| 0 | 0 | 0 | 0 | 1 |
| 0 | 1 | 0 | 0 | 0 |
| 0 | 0 | 0 | 1 | 0 |
| 0 | 0 | 0 | 0 | 1 |
| 0 | 0 | 0 | 0 | 0 |
| 1 | 0 | 0 | 0 | 0 |
| 0 | 1 | 0 | 0 | 0 |
| 0 | 0 | 0 | 0 | 1 |
| 0 | 0 | 0 | 1 | 0 |
| 0 | 1 | 0 | 0 | 0 |
| 0 | 1 | 0 | 0 | 0 |
| 0 | 0 | 0 | 1 | 0 |
| 0 | 0 | 1 | 0 | 0 |
| 0 | 1 | 0 | 0 | 0 |
| 0 | 0 | 0 | 0 | 0 |
| 0 | 1 | 0 | 0 | 0 |
| 0 | 0 | 0 | 0 | 0 |
| 0 | 1 | 0 | 0 | 0 |
| 0 | 0 | 0 | 0 | 0 |
| 0 | 0 | 0 | 1 | 0 |
| 0 | 0 | 0 | 1 | 0 |
| 0 | 1 | 0 | 0 | 0 |
| 0 | 0 | 0 | 0 | 0 |
| 0 | 0 | 0 | 1 | 0 |
| 0 | 0 | 0 | 1 | 0 |
| 0 | 1 | 0 | 0 | 0 |
| 0 | 0 | 0 | 0 | 1 |
| 0 | 1 | 0 | 0 | 0 |
| 0 | 0 | 0 | 0 | 0 |
| 0 | 0 | 0 | 1 | 0 |
| 0 | 0 | 0 | 0 | 1 |
| 1 | 0 | 0 | 0 | 0 |
| 0 | 0 | 0 | 1 | 0 |
| 0 | 0 | 1 | 0 | 0 |
| 0 | 0 | 0 | 1 | 0 |

|   |   |   |   |   |
|---|---|---|---|---|
| 0 | 0 | 0 | 1 | 0 |
| 0 | 0 | 0 | 1 | 0 |
| 0 | 0 | 0 | 0 | 1 |
| 0 | 1 | 0 | 0 | 0 |
| 0 | 0 | 0 | 1 | 0 |
| 0 | 0 | 0 | 1 | 0 |
| 0 | 1 | 0 | 0 | 0 |
| 0 | 1 | 0 | 0 | 0 |
| 0 | 0 | 0 | 0 | 1 |
| 0 | 1 | 0 | 0 | 0 |
| 0 | 0 | 1 | 0 | 0 |
| 0 | 0 | 0 | 1 | 0 |
| 0 | 0 | 0 | 1 | 0 |
| 0 | 0 | 0 | 1 | 0 |
| 0 | 0 | 0 | 0 | 1 |
| 0 | 1 | 0 | 0 | 0 |
| 0 | 0 | 0 | 0 | 1 |
| 0 | 1 | 0 | 0 | 0 |
| 0 | 0 | 0 | 1 | 0 |
| 0 | 1 | 0 | 0 | 0 |
| 0 | 1 | 0 | 0 | 0 |
| 0 | 0 | 0 | 0 | 0 |
| 0 | 0 | 0 | 0 | 0 |
| 0 | 0 | 0 | 1 | 0 |
| 0 | 0 | 0 | 0 | 1 |
| 0 | 1 | 0 | 0 | 0 |
| 0 | 1 | 0 | 0 | 0 |
| 0 | 0 | 0 | 0 | 0 |
| 0 | 0 | 0 | 0 | 1 |
| 0 | 0 | 0 | 0 | 1 |
| 0 | 1 | 0 | 0 | 0 |
| 0 | 1 | 0 | 0 | 0 |
| 0 | 0 | 0 | 1 | 0 |
| 0 | 0 | 0 | 0 | 1 |
| 0 | 1 | 0 | 0 | 0 |
| 0 | 0 | 0 | 0 | 1 |

|   |   |   |   |   |
|---|---|---|---|---|
| 0 | 1 | 0 | 0 | 0 |
| 0 | 1 | 0 | 0 | 0 |
| 0 | 1 | 0 | 0 | 0 |
| 0 | 0 | 0 | 0 | 1 |
| 0 | 1 | 0 | 0 | 0 |
| 0 | 0 | 0 | 0 | 0 |
| 0 | 0 | 0 | 0 | 1 |
| 0 | 0 | 1 | 0 | 0 |
| 0 | 1 | 0 | 0 | 0 |
| 0 | 0 | 0 | 0 | 1 |
| 1 | 1 | 0 | 1 | 0 |
| 0 | 0 | 0 | 0 | 0 |
| 0 | 1 | 0 | 1 | 0 |
| 0 | 1 | 0 | 0 | 0 |
| 0 | 1 | 0 | 0 | 0 |
| 0 | 1 | 0 | 0 | 0 |
| 0 | 1 | 0 | 0 | 0 |
| 0 | 1 | 0 | 0 | 0 |
| 0 | 0 | 0 | 1 | 0 |
| 0 | 1 | 0 | 0 | 0 |
| 0 | 1 | 0 | 0 | 0 |
| 0 | 1 | 0 | 0 | 0 |
| 0 | 1 | 0 | 0 | 0 |
| 0 | 0 | 0 | 1 | 0 |
| 0 | 0 | 0 | 1 | 0 |
| 0 | 1 | 0 | 0 | 0 |
| 0 | 1 | 0 | 0 | 0 |
| 0 | 1 | 0 | 0 | 0 |
| 0 | 1 | 0 | 0 | 0 |
| 0 | 0 | 0 | 1 | 0 |
| 0 | 1 | 0 | 0 | 0 |
| 0 | 1 | 0 | 0 | 0 |
| 0 | 0 | 0 | 1 | 0 |
| 0 | 1 | 0 | 0 | 0 |
| 0 | 0 | 0 | 1 | 0 |
| 0 | 1 | 0 | 0 | 0 |
| 0 | 0 | 0 | 1 | 0 |
| 0 | 0 | 0 | 1 | 0 |

|   |   |   |   |   |
|---|---|---|---|---|
| 0 | 1 | 0 | 0 | 0 |
| 0 | 1 | 0 | 0 | 0 |
| 0 | 0 | 0 | 1 | 0 |
| 0 | 1 | 0 | 0 | 0 |
| 0 | 1 | 0 | 0 | 0 |
| 0 | 0 | 0 | 0 | 1 |
| 0 | 0 | 0 | 1 | 0 |
| 0 | 0 | 0 | 1 | 0 |
| 0 | 1 | 0 | 0 | 0 |
| 0 | 0 | 0 | 0 | 0 |
| 0 | 1 | 0 | 0 | 0 |
| 0 | 0 | 0 | 0 | 0 |
| 0 | 1 | 0 | 0 | 0 |
| 0 | 0 | 0 | 0 | 0 |
| 0 | 1 | 0 | 0 | 0 |
| 0 | 0 | 0 | 0 | 0 |
| 0 | 1 | 0 | 0 | 0 |
| 0 | 0 | 0 | 0 | 0 |
| 0 | 0 | 1 | 0 | 0 |
| 0 | 1 | 0 | 0 | 0 |
| 0 | 0 | 0 | 1 | 0 |
| 0 | 1 | 0 | 0 | 0 |
| 0 | 1 | 0 | 0 | 0 |
| 0 | 0 | 0 | 0 | 0 |
| 0 | 1 | 0 | 0 | 0 |
| 0 | 0 | 0 | 0 | 0 |
| 0 | 1 | 0 | 0 | 0 |
| 0 | 0 | 0 | 0 | 0 |
| 0 | 1 | 0 | 0 | 0 |
| 0 | 0 | 0 | 0 | 0 |
| 0 | 1 | 0 | 0 | 0 |
| 0 | 0 | 0 | 0 | 0 |
| 0 | 0 | 0 | 1 | 1 |
| 0 | 0 | 0 | 0 | 1 |
| 0 | 1 | 0 | 0 | 0 |
| 0 | 0 | 1 | 0 | 0 |
| 0 | 0 | 0 | 1 | 0 |
| 0 | 1 | 0 | 0 | 0 |
| 0 | 0 | 0 | 0 | 0 |
| 0 | 0 | 0 | 0 | 1 |
| 0 | 1 | 0 | 0 | 0 |
| 0 | 1 | 0 | 0 | 0 |

|   |   |   |   |   |
|---|---|---|---|---|
| 0 | 0 | 0 | 1 | 0 |
| 0 | 0 | 1 | 0 | 0 |
| 0 | 0 | 0 | 0 | 1 |
| 0 | 1 | 0 | 0 | 0 |
| 0 | 1 | 0 | 0 | 0 |
| 0 | 1 | 0 | 0 | 0 |
| 0 | 0 | 0 | 0 | 1 |
| 0 | 1 | 0 | 0 | 0 |
| 0 | 1 | 0 | 0 | 0 |
| 0 | 0 | 0 | 1 | 0 |
| 0 | 1 | 0 | 0 | 0 |
| 0 | 0 | 0 | 0 | 1 |
| 0 | 0 | 0 | 0 | 1 |
| 0 | 0 | 0 | 0 | 1 |
| 0 | 1 | 0 | 0 | 0 |
| 0 | 0 | 0 | 0 | 1 |
| 0 | 1 | 0 | 0 | 0 |
| 0 | 1 | 0 | 0 | 0 |
| 0 | 0 | 0 | 0 | 1 |
| 0 | 1 | 0 | 0 | 0 |
| 0 | 0 | 1 | 0 | 0 |
| 0 | 1 | 0 | 0 | 0 |
| 0 | 1 | 0 | 0 | 0 |
| 0 | 0 | 0 | 1 | 0 |
| 0 | 0 | 0 | 0 | 1 |
| 0 | 0 | 0 | 0 | 1 |
| 0 | 0 | 0 | 0 | 1 |
| 0 | 1 | 0 | 0 | 0 |
| 0 | 0 | 0 | 0 | 0 |
| 0 | 0 | 0 | 1 | 0 |
| 0 | 1 | 0 | 0 | 1 |
| 0 | 0 | 0 | 0 | 1 |
| 0 | 0 | 0 | 0 | 0 |
| 0 | 1 | 0 | 0 | 0 |
| 0 | 1 | 0 | 0 | 0 |
| 0 | 0 | 0 | 0 | 1 |
| 0 | 0 | 0 | 1 | 0 |
| 0 | 1 | 0 | 0 | 1 |
| 0 | 1 | 0 | 0 | 0 |
| 0 | 0 | 0 | 0 | 1 |
| 0 | 0 | 0 | 0 | 0 |

|   |   |   |   |   |
|---|---|---|---|---|
| 0 | 0 | 0 | 0 | 1 |
| 0 | 1 | 0 | 1 | 0 |
| 0 | 0 | 0 | 0 | 1 |
| 0 | 0 | 0 | 0 | 1 |
| 0 | 0 | 0 | 0 | 1 |
| 0 | 0 | 0 | 0 | 1 |
| 0 | 1 | 0 | 0 | 0 |
| 0 | 1 | 0 | 0 | 0 |
| 0 | 0 | 0 | 0 | 0 |
| 0 | 0 | 0 | 0 | 1 |
| 0 | 1 | 0 | 0 | 0 |
| 0 | 0 | 0 | 0 | 1 |
| 0 | 1 | 0 | 0 | 0 |
| 0 | 0 | 1 | 0 | 0 |
| 0 | 0 | 0 | 0 | 1 |
| 0 | 1 | 0 | 0 | 0 |
| 0 | 0 | 0 | 0 | 1 |
| 0 | 0 | 0 | 0 | 0 |
| 0 | 0 | 0 | 0 | 1 |
| 0 | 1 | 0 | 0 | 0 |
| 0 | 1 | 0 | 0 | 0 |
| 0 | 1 | 0 | 0 | 0 |
| 0 | 1 | 0 | 0 | 0 |
| 0 | 1 | 0 | 0 | 0 |
| 0 | 0 | 0 | 1 | 0 |
| 0 | 0 | 0 | 1 | 0 |
| 0 | 1 | 0 | 0 | 0 |
| 0 | 1 | 0 | 0 | 0 |
| 0 | 0 | 0 | 0 | 1 |
| 0 | 0 | 0 | 0 | 1 |
| 0 | 0 | 0 | 0 | 1 |
| 0 | 0 | 0 | 0 | 1 |
| 0 | 0 | 0 | 0 | 1 |
| 0 | 0 | 0 | 1 | 0 |
| 0 | 1 | 0 | 0 | 0 |
| 0 | 0 | 0 | 0 | 1 |
| 0 | 1 | 0 | 0 | 0 |

|   |   |   |   |   |
|---|---|---|---|---|
| 0 | 0 | 0 | 0 | 1 |
| 0 | 0 | 0 | 0 | 1 |
| 0 | 1 | 0 | 0 | 0 |
| 0 | 0 | 0 | 0 | 1 |
| 0 | 0 | 0 | 0 | 1 |
| 0 | 0 | 0 | 0 | 1 |
| 0 | 0 | 0 | 0 | 1 |
| 0 | 0 | 0 | 1 | 0 |
| 0 | 0 | 0 | 1 | 0 |
| 0 | 1 | 0 | 0 | 0 |
| 0 | 1 | 0 | 0 | 0 |
| 0 | 0 | 0 | 0 | 1 |
| 0 | 0 | 0 | 1 | 0 |
| 0 | 0 | 0 | 0 | 1 |
| 0 | 0 | 0 | 1 | 0 |
| 0 | 0 | 0 | 0 | 1 |
| 0 | 0 | 0 | 1 | 0 |
| 0 | 1 | 0 | 0 | 1 |
| 0 | 0 | 0 | 0 | 0 |
| 0 | 0 | 0 | 0 | 1 |
| 0 | 0 | 0 | 0 | 1 |
| 0 | 1 | 0 | 0 | 0 |
| 0 | 1 | 0 | 0 | 0 |
| 0 | 1 | 0 | 0 | 0 |
| 0 | 1 | 0 | 0 | 0 |
| 0 | 1 | 0 | 0 | 0 |
| 0 | 1 | 0 | 0 | 0 |
| 0 | 1 | 0 | 0 | 0 |
| 0 | 0 | 1 | 0 | 1 |
| 0 | 1 | 0 | 0 | 0 |
| 0 | 0 | 0 | 0 | 1 |
| 0 | 0 | 0 | 1 | 0 |
| 0 | 0 | 0 | 0 | 1 |
| 0 | 1 | 0 | 1 | 0 |
| 0 | 0 | 0 | 1 | 0 |
| 0 | 1 | 0 | 0 | 0 |
| 0 | 1 | 0 | 0 | 0 |
| 0 | 0 | 0 | 0 | 1 |
| 0 | 1 | 0 | 0 | 0 |
| 0 | 0 | 0 | 0 | 1 |
| 0 | 1 | 0 | 0 | 0 |
| 0 | 0 | 1 | 0 | 0 |
| 0 | 1 | 0 | 0 | 0 |



|   |   |   |   |   |
|---|---|---|---|---|
| 0 | 0 | 0 | 0 | 1 |
| 0 | 1 | 0 | 0 | 0 |
| 0 | 0 | 0 | 1 | 0 |
| 0 | 1 | 0 | 0 | 0 |
| 0 | 0 | 0 | 0 | 1 |
| 0 | 1 | 0 | 0 | 0 |
| 0 | 1 | 1 | 0 | 0 |
| 0 | 0 | 0 | 1 | 0 |
| 0 | 1 | 0 | 0 | 0 |
| 0 | 0 | 0 | 0 | 0 |
| 0 | 0 | 0 | 0 | 1 |
| 0 | 0 | 0 | 0 | 1 |
| 0 | 0 | 0 | 1 | 0 |
| 0 | 1 | 0 | 0 | 0 |
| 0 | 1 | 0 | 0 | 1 |
| 0 | 0 | 0 | 0 | 1 |
| 0 | 0 | 0 | 0 | 1 |
| 0 | 0 | 0 | 0 | 1 |
| 0 | 0 | 0 | 0 | 1 |
| 0 | 0 | 0 | 1 | 0 |
| 0 | 1 | 0 | 0 | 0 |
| 0 | 0 | 0 | 0 | 1 |
| 0 | 1 | 0 | 1 | 0 |
| 0 | 0 | 0 | 0 | 1 |
| 0 | 0 | 0 | 0 | 1 |
| 0 | 0 | 0 | 0 | 1 |
| 0 | 0 | 0 | 0 | 1 |
| 0 | 0 | 0 | 0 | 1 |
| 0 | 0 | 0 | 0 | 1 |
| 0 | 0 | 0 | 0 | 1 |
| 0 | 1 | 0 | 0 | 0 |
| 0 | 0 | 0 | 0 | 1 |
| 0 | 0 | 0 | 0 | 1 |
| 0 | 0 | 0 | 0 | 1 |
| 0 | 1 | 0 | 0 | 0 |
| 0 | 1 | 0 | 0 | 0 |
| 0 | 0 | 0 | 0 | 1 |
| 0 | 0 | 0 | 0 | 0 |
| 0 | 1 | 0 | 0 | 0 |
| 0 | 1 | 0 | 0 | 0 |
| 0 | 0 | 0 | 0 | 1 |
| 0 | 0 | 0 | 0 | 1 |

|   |   |   |   |   |
|---|---|---|---|---|
| 0 | 0 | 0 | 0 | 1 |
| 0 | 0 | 0 | 1 | 0 |
| 0 | 1 | 0 | 0 | 0 |
| 0 | 0 | 0 | 0 | 0 |
| 0 | 0 | 0 | 0 | 1 |
| 0 | 1 | 0 | 0 | 0 |
| 0 | 0 | 0 | 0 | 1 |
| 0 | 1 | 0 | 0 | 0 |
| 0 | 1 | 1 | 0 | 0 |
| 0 | 1 | 0 | 0 | 0 |
| 0 | 1 | 0 | 0 | 0 |
| 0 | 1 | 0 | 0 | 0 |
| 0 | 1 | 0 | 0 | 0 |
| 0 | 1 | 0 | 0 | 0 |
| 0 | 1 | 0 | 0 | 0 |
| 0 | 1 | 0 | 0 | 0 |
| 0 | 0 | 0 | 0 | 1 |
| 0 | 1 | 0 | 0 | 0 |
| 0 | 0 | 0 | 0 | 1 |
| 0 | 0 | 0 | 0 | 1 |
| 0 | 1 | 0 | 0 | 0 |
| 0 | 1 | 0 | 0 | 0 |
| 0 | 0 | 0 | 0 | 1 |
| 0 | 0 | 0 | 0 | 1 |
| 0 | 0 | 0 | 1 | 0 |
| 0 | 0 | 0 | 0 | 1 |
| 0 | 0 | 0 | 0 | 1 |
| 0 | 1 | 0 | 0 | 0 |
| 0 | 0 | 0 | 0 | 1 |
| 0 | 0 | 0 | 0 | 1 |
| 0 | 1 | 0 | 0 | 0 |
| 0 | 1 | 0 | 0 | 0 |
| 0 | 0 | 0 | 1 | 0 |
| 0 | 0 | 0 | 1 | 0 |
| 0 | 0 | 0 | 0 | 1 |
| 0 | 1 | 0 | 0 | 0 |

|   |   |   |   |   |
|---|---|---|---|---|
| 0 | 0 | 0 | 0 | 1 |
| 0 | 0 | 0 | 1 | 0 |
| 0 | 0 | 1 | 0 | 0 |
| 0 | 0 | 0 | 0 | 1 |
| 0 | 0 | 0 | 1 | 0 |
| 0 | 1 | 0 | 0 | 0 |
| 0 | 1 | 0 | 0 | 0 |
| 0 | 0 | 0 | 0 | 1 |
| 0 | 0 | 0 | 1 | 1 |
| 0 | 1 | 0 | 0 | 0 |
| 0 | 1 | 0 | 0 | 0 |
| 0 | 0 | 0 | 0 | 1 |
| 0 | 0 | 0 | 0 | 1 |
| 0 | 1 | 0 | 0 | 0 |
| 0 | 1 | 0 | 0 | 0 |
| 0 | 0 | 0 | 0 | 1 |
| 0 | 0 | 0 | 0 | 0 |
| 0 | 1 | 0 | 1 | 0 |
| 0 | 1 | 0 | 0 | 0 |
| 0 | 1 | 0 | 0 | 0 |
| 0 | 1 | 0 | 0 | 0 |
| 0 | 0 | 0 | 0 | 1 |
| 0 | 0 | 0 | 1 | 0 |
| 0 | 1 | 0 | 0 | 0 |
| 0 | 1 | 0 | 0 | 0 |
| 0 | 1 | 0 | 0 | 0 |
| 0 | 0 | 0 | 0 | 0 |
| 0 | 0 | 0 | 1 | 0 |
| 0 | 1 | 0 | 0 | 0 |
| 0 | 0 | 0 | 0 | 1 |
| 0 | 0 | 0 | 0 | 1 |
| 0 | 0 | 0 | 1 | 0 |
| 0 | 0 | 0 | 0 | 1 |
| 0 | 0 | 0 | 1 | 0 |
| 0 | 0 | 0 | 0 | 1 |
| 0 | 0 | 0 | 1 | 0 |

|   |   |   |   |   |
|---|---|---|---|---|
| 0 | 0 | 0 | 0 | 1 |
| 0 | 0 | 0 | 1 | 0 |
| 0 | 0 | 0 | 1 | 0 |
| 0 | 1 | 0 | 0 | 0 |
| 0 | 0 | 0 | 0 | 1 |
| 0 | 0 | 1 | 0 | 0 |
| 0 | 1 | 0 | 0 | 0 |
| 0 | 1 | 0 | 0 | 0 |
| 0 | 0 | 0 | 0 | 1 |
| 0 | 0 | 0 | 0 | 1 |
| 0 | 0 | 0 | 0 | 1 |
| 0 | 1 | 0 | 0 | 0 |
| 0 | 0 | 0 | 0 | 1 |
| 0 | 1 | 0 | 0 | 0 |
| 0 | 1 | 0 | 0 | 0 |
| 0 | 0 | 0 | 0 | 1 |
| 0 | 1 | 0 | 0 | 0 |
| 0 | 1 | 0 | 0 | 0 |
| 0 | 1 | 0 | 0 | 0 |
| 0 | 1 | 0 | 0 | 0 |
| 0 | 1 | 0 | 0 | 0 |
| 0 | 1 | 0 | 0 | 0 |
| 0 | 0 | 0 | 0 | 1 |
| 0 | 1 | 0 | 0 | 0 |
| 0 | 1 | 0 | 0 | 0 |
| 0 | 0 | 0 | 0 | 1 |
| 0 | 1 | 0 | 0 | 0 |
| 0 | 0 | 0 | 0 | 1 |
| 0 | 1 | 0 | 0 | 0 |
| 0 | 0 | 1 | 0 | 0 |
| 0 | 1 | 0 | 0 | 0 |
| 0 | 0 | 0 | 0 | 1 |
| 0 | 1 | 0 | 0 | 0 |
| 0 | 0 | 0 | 0 | 1 |
| 0 | 1 | 0 | 1 | 0 |
| 0 | 0 | 0 | 1 | 0 |
| 0 | 1 | 0 | 0 | 0 |
| 0 | 1 | 0 | 0 | 0 |

|   |   |   |   |   |
|---|---|---|---|---|
| 0 | 0 | 0 | 1 | 0 |
| 0 | 0 | 0 | 1 | 0 |
| 0 | 0 | 0 | 1 | 0 |
| 0 | 0 | 0 | 0 | 1 |
| 0 | 1 | 0 | 1 | 0 |
| 0 | 1 | 0 | 0 | 0 |
| 0 | 1 | 0 | 0 | 0 |
| 0 | 0 | 0 | 0 | 1 |
| 0 | 1 | 0 | 0 | 0 |
| 0 | 1 | 0 | 0 | 0 |
| 0 | 1 | 0 | 0 | 0 |
| 0 | 0 | 0 | 1 | 0 |
| 0 | 1 | 0 | 0 | 0 |
| 0 | 1 | 0 | 0 | 0 |
| 0 | 0 | 0 | 1 | 0 |
| 0 | 0 | 0 | 0 | 1 |
| 0 | 1 | 0 | 0 | 0 |
| 0 | 0 | 0 | 0 | 0 |
| 0 | 1 | 0 | 1 | 0 |
| 0 | 0 | 0 | 0 | 0 |
| 0 | 1 | 0 | 0 | 0 |
| 0 | 0 | 0 | 1 | 0 |
| 0 | 1 | 0 | 0 | 0 |
| 0 | 0 | 0 | 0 | 0 |
| 0 | 1 | 0 | 0 | 0 |
| 0 | 0 | 0 | 1 | 0 |
| 0 | 0 | 0 | 0 | 0 |
| 0 | 0 | 0 | 0 | 0 |
| 0 | 0 | 0 | 0 | 1 |
| 0 | 0 | 0 | 0 | 1 |
| 0 | 0 | 0 | 0 | 1 |
| 0 | 1 | 0 | 0 | 1 |
| 0 | 0 | 0 | 0 | 0 |
| 0 | 0 | 0 | 0 | 1 |
| 0 | 1 | 0 | 0 | 0 |
| 0 | 1 | 0 | 1 | 0 |

|   |   |   |   |   |
|---|---|---|---|---|
| 0 | 0 | 0 | 0 | 1 |
| 0 | 0 | 1 | 0 | 0 |
| 0 | 1 | 0 | 0 | 0 |
| 0 | 1 | 0 | 0 | 0 |
| 0 | 1 | 0 | 0 | 0 |
| 0 | 0 | 0 | 0 | 1 |
| 0 | 0 | 1 | 0 | 0 |
| 0 | 1 | 0 | 0 | 0 |
| 0 | 0 | 0 | 0 | 0 |
| 0 | 1 | 0 | 0 | 0 |
| 0 | 0 | 1 | 0 | 0 |
| 0 | 0 | 0 | 0 | 0 |
| 0 | 0 | 0 | 0 | 0 |
| 0 | 1 | 0 | 0 | 0 |
| 0 | 0 | 1 | 0 | 0 |
| 0 | 1 | 0 | 0 | 0 |
| 0 | 1 | 0 | 0 | 0 |
| 0 | 0 | 0 | 0 | 0 |
| 0 | 0 | 0 | 0 | 1 |
| 0 | 1 | 0 | 0 | 0 |
| 0 | 1 | 0 | 0 | 0 |
| 0 | 0 | 0 | 0 | 1 |
| 0 | 1 | 0 | 0 | 0 |
| 0 | 0 | 0 | 0 | 0 |
| 0 | 1 | 0 | 0 | 0 |
| 0 | 1 | 0 | 0 | 0 |
| 0 | 0 | 0 | 0 | 1 |
| 0 | 1 | 0 | 0 | 0 |
| 0 | 0 | 0 | 0 | 0 |
| 0 | 0 | 0 | 0 | 1 |
| 0 | 0 | 0 | 0 | 1 |
| 0 | 0 | 0 | 0 | 1 |
| 0 | 1 | 0 | 0 | 0 |
| 0 | 1 | 0 | 0 | 0 |
| 0 | 0 | 0 | 0 | 0 |
| 0 | 1 | 0 | 0 | 0 |
| 0 | 1 | 0 | 0 | 0 |
| 0 | 1 | 0 | 0 | 0 |
| 0 | 0 | 0 | 0 | 1 |

|   |   |   |   |   |
|---|---|---|---|---|
| 0 | 0 | 0 | 1 | 0 |
| 0 | 0 | 0 | 0 | 0 |
| 0 | 0 | 0 | 0 | 1 |
| 0 | 1 | 0 | 0 | 0 |
| 0 | 1 | 0 | 0 | 0 |
| 0 | 1 | 0 | 0 | 0 |
| 0 | 1 | 0 | 0 | 0 |
| 0 | 1 | 0 | 0 | 0 |
| 0 | 0 | 0 | 0 | 1 |
| 0 | 0 | 0 | 0 | 1 |
| 0 | 0 | 0 | 0 | 0 |
| 0 | 1 | 0 | 0 | 0 |
| 0 | 0 | 0 | 0 | 1 |
| 0 | 1 | 0 | 0 | 0 |
| 0 | 1 | 0 | 0 | 0 |
| 0 | 0 | 0 | 0 | 0 |
| 0 | 1 | 0 | 0 | 0 |
| 0 | 0 | 1 | 0 | 0 |
| 0 | 1 | 0 | 0 | 0 |
| 0 | 0 | 0 | 0 | 1 |
| 0 | 1 | 0 | 0 | 0 |
| 0 | 0 | 0 | 0 | 1 |
| 0 | 0 | 0 | 0 | 1 |
| 0 | 0 | 0 | 0 | 0 |
| 0 | 1 | 0 | 0 | 0 |
| 0 | 0 | 0 | 0 | 0 |
| 0 | 0 | 0 | 1 | 0 |
| 0 | 0 | 0 | 0 | 1 |
| 0 | 0 | 0 | 0 | 1 |
| 0 | 1 | 0 | 0 | 0 |
| 0 | 0 | 0 | 0 | 0 |
| 0 | 0 | 0 | 1 | 0 |
| 0 | 0 | 0 | 0 | 1 |
| 0 | 1 | 0 | 0 | 0 |
| 0 | 0 | 0 | 0 | 1 |
| 0 | 0 | 0 | 1 | 0 |
| 0 | 0 | 0 | 0 | 1 |
| 0 | 0 | 0 | 0 | 1 |
| 0 | 1 | 0 | 0 | 0 |

|   |   |   |   |   |
|---|---|---|---|---|
| 0 | 0 | 0 | 0 | 1 |
| 0 | 0 | 0 | 0 | 1 |
| 0 | 0 | 0 | 1 | 0 |
| 0 | 1 | 0 | 0 | 0 |
| 0 | 0 | 0 | 0 | 1 |
| 0 | 0 | 0 | 0 | 1 |
| 0 | 0 | 0 | 0 | 1 |
| 0 | 0 | 1 | 0 | 0 |
| 0 | 0 | 0 | 0 | 1 |
| 0 | 0 | 0 | 1 | 0 |
| 0 | 0 | 0 | 1 | 0 |
| 0 | 1 | 0 | 0 | 0 |
| 0 | 0 | 0 | 0 | 1 |
| 0 | 0 | 0 | 0 | 1 |
| 0 | 0 | 0 | 0 | 1 |
| 0 | 0 | 0 | 0 | 1 |
| 0 | 0 | 0 | 0 | 1 |
| 0 | 0 | 0 | 0 | 1 |
| 0 | 1 | 0 | 0 | 0 |
| 0 | 1 | 0 | 0 | 0 |
| 0 | 0 | 0 | 1 | 0 |
| 0 | 1 | 0 | 0 | 0 |
| 0 | 1 | 0 | 0 | 0 |
| 0 | 1 | 0 | 0 | 0 |
| 0 | 1 | 0 | 0 | 0 |
| 0 | 0 | 0 | 0 | 1 |
| 0 | 0 | 0 | 0 | 0 |
| 0 | 1 | 0 | 0 | 0 |
| 0 | 1 | 0 | 0 | 0 |
| 0 | 0 | 0 | 0 | 1 |
| 0 | 0 | 0 | 0 | 1 |
| 0 | 1 | 0 | 0 | 0 |
| 0 | 0 | 0 | 0 | 1 |
| 0 | 0 | 0 | 0 | 1 |
| 0 | 0 | 0 | 1 | 0 |
| 0 | 0 | 0 | 0 | 1 |
| 0 | 0 | 0 | 0 | 1 |
| 0 | 1 | 0 | 0 | 0 |
| 0 | 1 | 0 | 0 | 0 |
| 0 | 1 | 0 | 0 | 0 |



|   |   |   |   |   |
|---|---|---|---|---|
| 1 | 0 | 0 | 0 | 0 |
| 0 | 0 | 0 | 0 | 1 |
| 0 | 0 | 0 | 1 | 0 |
| 0 | 1 | 0 | 0 | 0 |
| 0 | 0 | 0 | 0 | 1 |
| 0 | 0 | 0 | 0 | 0 |
| 0 | 0 | 0 | 0 | 1 |
| 0 | 0 | 0 | 0 | 1 |
| 0 | 1 | 0 | 0 | 0 |
| 0 | 1 | 0 | 0 | 0 |
| 0 | 0 | 0 | 0 | 0 |
| 0 | 0 | 0 | 0 | 1 |
| 0 | 0 | 0 | 1 | 0 |
| 0 | 0 | 0 | 0 | 1 |
| 0 | 1 | 0 | 0 | 0 |
| 0 | 1 | 0 | 0 | 0 |
| 0 | 0 | 0 | 0 | 1 |
| 0 | 0 | 0 | 0 | 1 |
| 0 | 0 | 0 | 0 | 1 |
| 0 | 0 | 0 | 0 | 1 |
| 0 | 0 | 0 | 1 | 0 |
| 0 | 0 | 0 | 0 | 1 |
| 0 | 0 | 0 | 1 | 0 |
| 0 | 0 | 0 | 0 | 0 |
| 0 | 0 | 0 | 0 | 1 |
| 0 | 0 | 0 | 0 | 1 |
| 0 | 0 | 0 | 0 | 0 |
| 0 | 0 | 0 | 0 | 0 |
| 0 | 0 | 0 | 0 | 0 |
| 0 | 0 | 0 | 0 | 0 |
| 0 | 0 | 1 | 0 | 0 |
| 0 | 1 | 0 | 0 | 0 |
| 0 | 1 | 0 | 0 | 0 |
| 0 | 1 | 0 | 0 | 0 |
| 0 | 0 | 0 | 0 | 1 |
| 0 | 0 | 0 | 0 | 1 |
| 0 | 0 | 0 | 1 | 0 |
| 0 | 0 | 0 | 0 | 0 |
| 0 | 0 | 0 | 0 | 0 |
| 0 | 1 | 0 | 0 | 0 |
| 0 | 1 | 0 | 0 | 0 |
| 0 | 0 | 0 | 0 | 1 |
| 0 | 0 | 0 | 0 | 1 |
| 0 | 1 | 0 | 0 | 0 |

|   |   |   |   |   |
|---|---|---|---|---|
| 0 | 1 | 0 | 0 | 0 |
| 0 | 0 | 0 | 0 | 1 |
| 0 | 0 | 0 | 0 | 1 |
| 0 | 1 | 0 | 0 | 0 |
| 0 | 1 | 0 | 0 | 0 |
| 0 | 0 | 0 | 0 | 1 |
| 0 | 1 | 0 | 0 | 0 |
| 0 | 1 | 0 | 0 | 0 |
| 0 | 0 | 0 | 0 | 1 |
| 0 | 0 | 0 | 0 | 1 |
| 0 | 0 | 0 | 0 | 1 |
| 0 | 1 | 0 | 0 | 0 |
| 0 | 0 | 0 | 0 | 1 |
| 0 | 1 | 0 | 0 | 1 |
| 0 | 0 | 0 | 1 | 0 |
| 0 | 0 | 0 | 0 | 1 |
| 0 | 0 | 0 | 0 | 1 |
| 0 | 1 | 0 | 0 | 0 |
| 0 | 0 | 0 | 1 | 0 |
| 0 | 0 | 0 | 0 | 1 |
| 0 | 0 | 0 | 0 | 1 |
| 0 | 0 | 0 | 0 | 1 |
| 0 | 0 | 0 | 0 | 1 |
| 0 | 1 | 0 | 0 | 0 |
| 0 | 0 | 0 | 0 | 1 |
| 0 | 0 | 0 | 0 | 1 |
| 0 | 0 | 0 | 0 | 1 |
| 0 | 0 | 0 | 0 | 1 |
| 0 | 0 | 1 | 0 | 0 |
| 0 | 0 | 0 | 0 | 1 |
| 0 | 0 | 0 | 0 | 1 |
| 0 | 1 | 0 | 0 | 0 |
| 0 | 1 | 0 | 0 | 0 |
| 0 | 1 | 0 | 0 | 0 |
| 0 | 0 | 0 | 0 | 1 |

|   |   |   |   |   |
|---|---|---|---|---|
| 0 | 0 | 0 | 0 | 1 |
| 0 | 1 | 0 | 0 | 0 |
| 0 | 0 | 0 | 0 | 0 |
| 0 | 1 | 0 | 0 | 0 |
| 0 | 0 | 0 | 0 | 0 |
| 0 | 1 | 0 | 0 | 0 |
| 0 | 0 | 0 | 0 | 1 |
| 0 | 0 | 0 | 0 | 1 |
| 0 | 1 | 0 | 1 | 0 |
| 0 | 0 | 0 | 0 | 1 |
| 0 | 1 | 0 | 0 | 0 |
| 0 | 0 | 0 | 0 | 1 |
| 0 | 0 | 0 | 0 | 1 |
| 0 | 0 | 0 | 0 | 1 |
| 0 | 1 | 0 | 1 | 0 |
| 0 | 0 | 0 | 0 | 1 |
| 0 | 1 | 0 | 0 | 0 |
| 0 | 1 | 0 | 0 | 0 |
| 0 | 1 | 0 | 0 | 0 |
| 0 | 1 | 0 | 0 | 0 |
| 0 | 1 | 0 | 0 | 0 |
| 0 | 1 | 0 | 0 | 0 |
| 0 | 1 | 0 | 0 | 0 |
| 0 | 1 | 0 | 0 | 0 |
| 0 | 0 | 0 | 0 | 1 |
| 0 | 1 | 0 | 0 | 0 |
| 0 | 0 | 0 | 0 | 1 |
| 0 | 1 | 0 | 0 | 0 |
| 0 | 0 | 0 | 0 | 0 |
| 0 | 1 | 0 | 1 | 0 |
| 0 | 0 | 0 | 1 | 0 |
| 0 | 0 | 0 | 1 | 0 |
| 0 | 0 | 0 | 1 | 0 |
| 1 | 1 | 1 | 1 | 0 |
| 0 | 1 | 0 | 0 | 0 |
| 0 | 1 | 0 | 0 | 0 |
| 0 | 0 | 0 | 1 | 0 |
| 0 | 0 | 0 | 1 | 0 |
| 0 | 0 | 0 | 0 | 1 |
| 0 | 0 | 0 | 0 | 0 |

|   |   |   |   |            |
|---|---|---|---|------------|
| 0 | 1 | 0 | 0 | 0          |
| 0 | 0 | 0 | 0 | 1          |
| 0 | 0 | 0 | 0 | 1          |
| 0 | 1 | 0 | 0 | 0          |
| 0 | 1 | 0 | 0 | 0          |
| 0 | 0 | 0 | 0 | 1          |
| 0 | 0 | 0 | 1 | 0 hispanic |
| 0 | 0 | 0 | 0 | 1          |
| 0 | 1 | 0 | 0 | 0          |
| 0 | 0 | 0 | 1 | 0 latino   |
| 0 | 1 | 0 | 0 | 0          |
| 0 | 1 | 0 | 0 | 0          |
| 0 | 0 | 0 | 1 | 0 Indan    |
| 0 | 0 | 0 | 1 | 0 Hispanic |
| 0 | 1 | 0 | 0 | 0          |
| 0 | 1 | 0 | 0 | 0          |
| 0 | 1 | 0 | 0 | 0          |
| 0 | 1 | 0 | 0 | 0          |
| 0 | 1 | 0 | 0 | 0          |
| 0 | 1 | 0 | 0 | 0          |
| 0 | 1 | 0 | 0 | 0          |
| 0 | 1 | 0 | 0 | 0          |
| 0 | 0 | 0 | 0 | 0          |
| 0 | 1 | 0 | 0 | 0          |
| 0 | 0 | 0 | 0 | 0          |
| 0 | 1 | 0 | 0 | 0          |
| 0 | 0 | 0 | 0 | 1          |
| 0 | 0 | 0 | 0 | 1          |
| 0 | 1 | 0 | 0 | 0          |
| 0 | 1 | 0 | 0 | 0          |
| 0 | 1 | 0 | 0 | 0          |
| 0 | 0 | 0 | 0 | 1          |
| 0 | 0 | 0 | 0 | 1          |
| 0 | 1 | 0 | 0 | 0          |
| 0 | 1 | 0 | 0 | 0          |
| 0 | 0 | 0 | 0 | 0          |
| 0 | 1 | 0 | 0 | 0          |
| 0 | 0 | 0 | 0 | 0          |
| 0 | 1 | 0 | 0 | 0          |
| 0 | 1 | 0 | 0 | 0          |
| 0 | 1 | 0 | 0 | 0          |
| 0 | 0 | 0 | 1 | 0 Hispanic |

|   |   |   |   |                           |
|---|---|---|---|---------------------------|
| 0 | 1 | 1 | 0 | 0                         |
| 0 | 1 | 0 | 0 | 0                         |
| 0 | 0 | 0 | 1 | 0 No answer               |
| 0 | 0 | 0 | 1 | 0 hispanic                |
| 0 | 0 | 0 | 0 | 1                         |
| 0 | 0 | 0 | 1 | 0                         |
| 0 | 1 | 0 | 0 | 0                         |
| 0 | 1 | 0 | 0 | 0                         |
| 0 | 1 | 0 | 0 | 0                         |
| 0 | 0 | 0 | 1 | 0 half white and hispanic |
| 0 | 1 | 0 | 0 | 0                         |
| 0 | 0 | 0 | 0 | 1                         |
| 0 | 0 | 0 | 1 | 0 latino                  |
| 0 | 1 | 0 | 0 | 0                         |
| 0 | 0 | 0 | 0 | 1                         |
| 0 | 0 | 0 | 0 | 1                         |
| 0 | 1 | 0 | 0 | 0                         |
| 0 | 1 | 0 | 1 | 0 hispanic                |
| 0 | 1 | 0 | 0 | 0                         |
| 0 | 1 | 0 | 0 | 0                         |
| 0 | 0 | 0 | 0 | 1                         |
| 0 | 1 | 0 | 0 | 0                         |
| 0 | 1 | 0 | 0 | 0                         |
| 0 | 1 | 0 | 0 | 0                         |
| 0 | 1 | 0 | 0 | 0                         |
| 0 | 1 | 0 | 0 | 0                         |
| 0 | 0 | 0 | 1 | 0 hispanic/latino         |
| 0 | 1 | 0 | 0 | 0                         |
| 0 | 1 | 0 | 0 | 0                         |
| 0 | 1 | 0 | 0 | 0                         |
| 0 | 1 | 0 | 0 | 0                         |
| 0 | 0 | 0 | 1 | 0 hispanic                |
| 0 | 1 | 0 | 0 | 0                         |
| 0 | 1 | 0 | 0 | 0                         |
| 0 | 0 | 0 | 0 | 1                         |
| 0 | 1 | 0 | 0 | 0                         |
| 0 | 1 | 0 | 0 | 0                         |
| 0 | 0 | 0 | 0 | 1                         |
| 0 | 0 | 0 | 1 | 0 hispanic                |
| 0 | 0 | 0 | 1 | 0 mexican                 |
| 0 | 0 | 0 | 1 | 0 hispanic                |
| 0 | 1 | 0 | 0 | 0                         |
| 0 | 1 | 1 | 0 | 0                         |
| 0 | 0 | 0 | 0 | 1                         |
| 0 | 0 | 0 | 0 | 0                         |
| 0 | 1 | 0 | 0 | 0                         |

|   |   |   |   |                   |
|---|---|---|---|-------------------|
| 0 | 0 | 0 | 0 | 1                 |
| 0 | 0 | 0 | 0 | 1                 |
| 0 | 1 | 0 | 0 | 0                 |
| 0 | 0 | 0 | 1 | 0 no answer given |
| 0 | 1 | 0 | 0 | 0                 |
| 0 | 0 | 0 | 0 | 1                 |
| 0 | 0 | 0 | 0 | 1                 |
| 0 | 1 | 0 | 0 | 0                 |
| 0 | 0 | 0 | 0 | 1                 |
| 0 | 0 | 0 | 0 | 1                 |
| 0 | 0 | 0 | 0 | 1                 |
| 0 | 1 | 0 | 0 | 0                 |
| 0 | 1 | 0 | 0 | 0                 |
| 0 | 1 | 0 | 0 | 0                 |
| 0 | 0 | 0 | 0 | 1                 |
| 0 | 0 | 0 | 0 | 1                 |
| 0 | 1 | 0 | 0 | 0                 |
| 0 | 0 | 0 | 0 | 1                 |
| 0 | 0 | 0 | 0 | 1                 |
| 0 | 1 | 0 | 0 | 0                 |
| 0 | 1 | 0 | 0 | 0                 |
| 0 | 0 | 0 | 0 | 1                 |
| 0 | 0 | 0 | 0 | 1                 |
| 0 | 1 | 0 | 0 | 0                 |
| 0 | 1 | 0 | 0 | 0                 |
| 0 | 0 | 0 | 0 | 1                 |
| 0 | 0 | 0 | 0 | 1                 |
| 0 | 1 | 0 | 0 | 0                 |
| 0 | 1 | 0 | 0 | 0                 |
| 0 | 0 | 0 | 0 | 1                 |
| 0 | 0 | 0 | 0 | 1                 |
| 0 | 1 | 0 | 0 | 0                 |
| 0 | 0 | 0 | 1 | 0 mexican         |
| 0 | 0 | 0 | 0 | 1                 |
| 0 | 1 | 0 | 0 | 0                 |
| 0 | 0 | 0 | 0 | 1                 |
| 0 | 1 | 0 | 0 | 0                 |
| 0 | 1 | 0 | 0 | 0                 |
| 0 | 0 | 0 | 0 | 0                 |
| 0 | 0 | 0 | 1 | 0 no answer given |

|   |   |   |   |                   |
|---|---|---|---|-------------------|
| 0 | 0 | 0 | 0 | 1                 |
| 0 | 0 | 0 | 0 | 1                 |
| 0 | 1 | 0 | 0 | 0                 |
| 0 | 0 | 0 | 1 | 0 American        |
| 0 | 0 | 0 | 1 | 0 no answer given |
| 0 | 0 | 0 | 1 | 0 no answer given |
| 0 | 0 | 0 | 1 | 0 hispanic        |
| 0 | 0 | 0 | 1 | 0 mexican         |
| 0 | 0 | 0 | 1 | 0 Mexicano        |
| 0 | 0 | 0 | 1 | 0 no answer given |
| 0 | 0 | 0 | 1 | 0 hispanic        |
| 0 | 0 | 0 | 1 | 0 Hispanic        |
| 0 | 0 | 0 | 1 | 0 no answer given |
| 0 | 0 | 0 | 1 | 0 White hispanic  |
| 0 | 0 | 0 | 1 | 0 hispanic        |
| 0 | 1 | 0 | 0 | 0                 |
| 0 | 1 | 0 | 0 | 0                 |
| 0 | 1 | 0 | 0 | 0                 |
| 0 | 0 | 1 | 0 | 0                 |
| 0 | 1 | 0 | 0 | 0                 |
| 0 | 0 | 0 | 1 | 0 white/hispanic  |
| 0 | 1 | 0 | 0 | 0                 |
| 0 | 1 | 0 | 0 | 0                 |
| 0 | 1 | 0 | 0 | 0                 |
| 0 | 1 | 0 | 0 | 0                 |
| 0 | 1 | 0 | 0 | 0                 |
| 0 | 1 | 0 | 0 | 0                 |
| 0 | 1 | 0 | 0 | 0                 |
| 0 | 1 | 0 | 0 | 0                 |
| 0 | 1 | 0 | 0 | 0                 |
| 0 | 0 | 0 | 1 | 0 Hispanic        |
| 0 | 1 | 0 | 0 | 0                 |
| 0 | 1 | 0 | 0 | 0                 |
| 0 | 0 | 0 | 1 | 0 no answer given |
| 0 | 0 | 1 | 0 | 0                 |
| 0 | 1 | 0 | 0 | 0                 |
| 0 | 1 | 0 | 0 | 0                 |
| 0 | 1 | 1 | 1 | 0 By racial       |
| 0 | 0 | 0 | 0 | 1                 |
| 0 | 1 | 0 | 0 | 0                 |
| 0 | 0 | 1 | 0 | 0                 |
| 0 | 1 | 0 | 0 | 0                 |
| 0 | 1 | 0 | 0 | 0                 |
| 0 | 0 | 0 | 0 | 1                 |
| 0 | 1 | 0 | 0 | 0                 |
| 0 | 0 | 0 | 1 | 0 hispanic        |
| 1 | 0 | 0 | 0 | 0                 |
| 0 | 0 | 0 | 0 | 1                 |
| 0 | 1 | 0 | 0 | 0                 |

|   |   |   |   |                   |
|---|---|---|---|-------------------|
| 0 | 1 | 0 | 0 | 0                 |
| 0 | 1 | 0 | 0 | 0                 |
| 0 | 1 | 0 | 0 | 0                 |
| 0 | 0 | 0 | 0 | 0                 |
| 0 | 1 | 0 | 0 | 0                 |
| 0 | 1 | 0 | 0 | 0                 |
| 0 | 1 | 0 | 0 | 0                 |
| 0 | 0 | 0 | 0 | 1                 |
| 0 | 0 | 0 | 0 | 1                 |
| 0 | 1 | 0 | 0 | 0                 |
| 0 | 0 | 0 | 0 | 1                 |
| 0 | 1 | 0 | 0 | 0                 |
| 0 | 1 | 0 | 0 | 0                 |
| 0 | 1 | 0 | 0 | 0                 |
| 0 | 0 | 0 | 0 | 1                 |
| 0 | 0 | 0 | 0 | 1                 |
| 0 | 0 | 0 | 0 | 1                 |
| 0 | 0 | 0 | 1 | 0 latina/hispanic |
| 0 | 0 | 0 | 0 | 1                 |
| 0 | 0 | 0 | 0 | 1                 |
| 0 | 0 | 0 | 0 | 1                 |
| 0 | 0 | 0 | 1 | 0 spainurd        |
| 0 | 1 | 0 | 0 | 0                 |
| 0 | 1 | 0 | 0 | 0                 |
| 0 | 1 | 0 | 0 | 0                 |
| 0 | 0 | 0 | 0 | 1                 |
| 0 | 0 | 0 | 0 | 1                 |
| 0 | 1 | 0 | 0 | 0                 |
| 0 | 0 | 0 | 1 | 0 latino          |
| 0 | 1 | 0 | 0 | 0                 |
| 0 | 1 | 0 | 0 | 0                 |
| 0 | 1 | 0 | 0 | 0                 |
| 1 | 0 | 0 | 0 | 0                 |
| 0 | 0 | 0 | 0 | 1                 |
| 0 | 0 | 0 | 1 | 0 Hispanic/White  |
| 0 | 1 | 0 | 0 | 0                 |
| 0 | 1 | 0 | 0 | 0                 |
| 0 | 0 | 0 | 0 | 1                 |
| 0 | 1 | 0 | 0 | 0                 |
| 0 | 0 | 0 | 0 | 1                 |
| 0 | 0 | 0 | 1 | 0 Mexican         |
| 0 | 0 | 0 | 0 | 1                 |
| 0 | 1 | 0 | 0 | 0                 |
| 0 | 0 | 0 | 0 | 1                 |



|   |   |   |   |                                  |
|---|---|---|---|----------------------------------|
| 0 | 0 | 0 | 0 | 1                                |
| 0 | 1 | 0 | 0 | 0                                |
| 0 | 0 | 0 | 0 | 1                                |
| 0 | 1 | 0 | 0 | 0                                |
| 0 | 1 | 0 | 0 | 0                                |
| 0 | 1 | 0 | 0 | 0                                |
| 0 | 1 | 0 | 1 | 0 American                       |
| 0 | 0 | 0 | 0 | 1                                |
| 0 | 1 | 0 | 0 | 0                                |
| 0 | 0 | 0 | 1 | 0 white/native american          |
| 0 | 0 | 0 | 0 | 1                                |
| 0 | 1 | 0 | 0 | 0                                |
| 0 | 0 | 0 | 1 | 0 no answer given                |
| 0 | 0 | 0 | 0 | 1                                |
| 0 | 0 | 0 | 0 | 0                                |
| 0 | 0 | 0 | 0 | 1                                |
| 0 | 1 | 0 | 0 | 0                                |
| 0 | 0 | 0 | 1 | 0 italian, black, chericy indian |
| 0 | 1 | 0 | 0 | 0                                |
| 0 | 1 | 0 | 1 | 0 and Indian                     |
| 0 | 0 | 0 | 0 | 1                                |
| 0 | 0 | 0 | 0 | 1                                |
| 0 | 1 | 0 | 0 | 0                                |
| 0 | 1 | 0 | 0 | 0                                |
| 0 | 0 | 0 | 0 | 1                                |
| 0 | 0 | 0 | 0 | 1                                |
| 0 | 1 | 0 | 1 | 0 Mexican                        |
| 0 | 0 | 0 | 0 | 1                                |
| 0 | 1 | 0 | 0 | 0                                |
| 0 | 1 | 0 | 0 | 0                                |
| 0 | 0 | 0 | 1 | 0 American/Mexico                |
| 0 | 1 | 0 | 0 | 0                                |
| 0 | 0 | 0 | 0 | 1                                |
| 0 | 0 | 0 | 0 | 1                                |
| 0 | 0 | 0 | 0 | 1                                |
| 0 | 1 | 0 | 0 | 0                                |
| 0 | 0 | 0 | 0 | 1                                |
| 0 | 0 | 0 | 1 | 0 Latino                         |
| 0 | 0 | 0 | 0 | 1                                |
| 0 | 0 | 0 | 0 | 1                                |
| 0 | 1 | 0 | 0 | 0                                |
| 0 | 1 | 0 | 0 | 0                                |
| 0 | 0 | 0 | 0 | 1                                |
| 0 | 0 | 0 | 0 | 1                                |
| 0 | 1 | 0 | 0 | 0                                |
| 0 | 0 | 0 | 0 | 1                                |
| 0 | 1 | 0 | 0 | 0                                |
| 0 | 0 | 0 | 0 | 1                                |
| 0 | 0 | 0 | 0 | 1                                |

|   |   |   |   |                |
|---|---|---|---|----------------|
| 0 | 0 | 0 | 0 | 1              |
| 0 | 1 | 0 | 0 | 0              |
| 0 | 0 | 0 | 0 | 1              |
| 0 | 0 | 0 | 0 | 1              |
| 0 | 0 | 0 | 0 | 1              |
| 0 | 1 | 0 | 0 | 0              |
| 0 | 0 | 1 | 0 | 0              |
| 0 | 1 | 0 | 0 | 0              |
| 0 | 0 | 0 | 0 | 1              |
| 0 | 0 | 0 | 0 | 1              |
| 0 | 0 | 0 | 0 | 1              |
| 0 | 1 | 0 | 0 | 0              |
| 0 | 1 | 0 | 0 | 0              |
| 0 | 1 | 0 | 0 | 0              |
| 0 | 0 | 0 | 0 | 1              |
| 0 | 0 | 0 | 0 | 1              |
| 0 | 1 | 0 | 0 | 0              |
| 0 | 1 | 0 | 0 | 0              |
| 0 | 1 | 0 | 0 | 0              |
| 0 | 1 | 0 | 0 | 0              |
| 0 | 1 | 0 | 0 | 0              |
| 0 | 1 | 1 | 1 | 0 German/Irish |
| 0 | 1 | 0 | 0 | 0              |
| 0 | 1 | 0 | 0 | 0              |
| 0 | 0 | 0 | 0 | 1              |
| 0 | 0 | 0 | 0 | 1              |
| 0 | 1 | 0 | 0 | 0              |
| 0 | 1 | 0 | 0 | 0              |
| 0 | 1 | 0 | 1 | 0 Mexican      |
| 0 | 0 | 0 | 1 | 0 Hispanic     |
| 0 | 1 | 0 | 0 | 0              |
| 0 | 1 | 0 | 0 | 0              |
| 0 | 1 | 0 | 0 | 0              |
| 0 | 1 | 0 | 0 | 0              |
| 0 | 1 | 0 | 0 | 0              |
| 0 | 0 | 0 | 0 | 1              |
| 0 | 0 | 0 | 0 | 1              |
| 0 | 0 | 0 | 0 | 1              |
| 0 | 0 | 0 | 0 | 1              |
| 0 | 0 | 0 | 0 | 1              |
| 0 | 1 | 0 | 0 | 0              |
| 0 | 1 | 0 | 0 | 0              |
| 0 | 0 | 0 | 0 | 1              |
| 0 | 0 | 0 | 0 | 0              |
| 0 | 0 | 0 | 0 | 1              |
| 0 | 1 | 0 | 0 | 0              |
| 0 | 1 | 0 | 0 | 0              |

|   |   |   |   |   |                            |
|---|---|---|---|---|----------------------------|
| 0 | 1 | 0 | 0 | 0 |                            |
| 0 | 1 | 0 | 0 | 0 |                            |
| 0 | 0 | 0 | 1 | 0 | White Hispanic             |
| 0 | 0 | 1 | 0 | 0 |                            |
| 0 | 1 | 0 | 0 | 0 |                            |
| 0 | 1 | 0 | 0 | 0 |                            |
| 0 | 1 | 1 | 0 | 0 |                            |
| 0 | 1 | 0 | 0 | 0 |                            |
| 0 | 0 | 0 | 0 | 1 |                            |
| 0 | 0 | 0 | 0 | 1 |                            |
| 0 | 0 | 0 | 0 | 1 |                            |
| 0 | 1 | 0 | 0 | 0 |                            |
| 0 | 0 | 0 | 1 | 0 | Hispanic                   |
| 0 | 0 | 0 | 0 | 1 |                            |
| 0 | 1 | 0 | 1 | 0 | German                     |
| 0 | 1 | 0 | 0 | 0 |                            |
| 0 | 0 | 0 | 0 | 1 |                            |
| 0 | 0 | 0 | 0 | 1 |                            |
| 0 | 0 | 0 | 0 | 1 |                            |
| 0 | 0 | 0 | 0 | 1 |                            |
| 0 | 1 | 0 | 0 | 0 |                            |
| 0 | 1 | 0 | 0 | 0 |                            |
| 0 | 0 | 0 | 0 | 1 |                            |
| 0 | 0 | 0 | 0 | 0 |                            |
| 0 | 0 | 0 | 0 | 1 |                            |
| 0 | 0 | 0 | 0 | 1 |                            |
| 0 | 0 | 0 | 1 | 0 | Half American Half Mexican |
| 0 | 1 | 0 | 0 | 0 |                            |
| 0 | 0 | 0 | 0 | 1 |                            |
| 0 | 0 | 0 | 0 | 0 |                            |
| 0 | 0 | 0 | 0 | 0 |                            |
| 0 | 0 | 0 | 0 | 1 |                            |
| 0 | 0 | 0 | 0 | 1 |                            |
| 0 | 0 | 0 | 0 | 1 |                            |
| 0 | 0 | 0 | 0 | 1 |                            |
| 0 | 0 | 0 | 0 | 1 |                            |
| 0 | 0 | 0 | 0 | 1 |                            |
| 0 | 0 | 0 | 1 | 0 | am spanish                 |
| 0 | 0 | 0 | 0 | 1 |                            |
| 0 | 1 | 0 | 0 | 0 |                            |
| 0 | 0 | 0 | 0 | 1 |                            |
| 0 | 1 | 0 | 0 | 0 |                            |
| 0 | 1 | 0 | 0 | 0 |                            |
| 0 | 1 | 0 | 0 | 0 |                            |
| 0 | 1 | 0 | 0 | 0 |                            |
| 0 | 0 | 0 | 0 | 1 |                            |

|   |   |   |   |                   |
|---|---|---|---|-------------------|
| 0 | 1 | 0 | 0 | 0                 |
| 0 | 0 | 0 | 0 | 1                 |
| 0 | 0 | 0 | 0 | 1                 |
| 0 | 0 | 0 | 0 | 1                 |
| 0 | 0 | 0 | 0 | 1                 |
| 0 | 0 | 0 | 0 | 1                 |
| 0 | 1 | 0 | 0 | 0                 |
| 0 | 1 | 0 | 0 | 0                 |
| 0 | 1 | 0 | 0 | 0                 |
| 0 | 0 | 0 | 1 | 0 mexican         |
| 0 | 1 | 0 | 0 | 0                 |
| 0 | 1 | 0 | 0 | 0                 |
| 0 | 0 | 0 | 0 | 1                 |
| 0 | 0 | 0 | 0 | 1                 |
| 0 | 1 | 0 | 0 | 0                 |
| 0 | 1 | 0 | 0 | 0                 |
| 0 | 0 | 0 | 0 | 1                 |
| 0 | 0 | 0 | 0 | 1                 |
| 0 | 1 | 0 | 0 | 0                 |
| 0 | 0 | 0 | 0 | 0                 |
| 0 | 0 | 0 | 0 | 1                 |
| 0 | 0 | 0 | 0 | 1                 |
| 0 | 1 | 0 | 0 | 0                 |
| 0 | 1 | 0 | 0 | 0                 |
| 1 | 1 | 1 | 0 | 0                 |
| 0 | 0 | 0 | 0 | 1                 |
| 0 | 0 | 0 | 1 | 0 no answer given |
| 0 | 1 | 0 | 0 | 0                 |
| 0 | 0 | 0 | 0 | 1                 |
| 0 | 0 | 0 | 1 | 0 hispanic        |
| 0 | 0 | 0 | 0 | 1                 |
| 0 | 0 | 0 | 0 | 1                 |
| 0 | 1 | 0 | 0 | 0                 |
| 0 | 1 | 0 | 0 | 0                 |
| 0 | 0 | 0 | 0 | 1                 |
| 0 | 0 | 0 | 1 | 0 no answer given |
| 0 | 0 | 0 | 1 | 0 hispanic        |
| 0 | 0 | 0 | 0 | 1                 |
| 0 | 0 | 0 | 0 | 1                 |
| 0 | 0 | 0 | 0 | 1                 |
| 0 | 0 | 0 | 0 | 1                 |
| 0 | 0 | 0 | 0 | 1                 |
| 0 | 0 | 0 | 0 | 1                 |
| 0 | 0 | 0 | 1 | 0 hispanic        |
| 0 | 0 | 0 | 0 | 1                 |
| 0 | 1 | 0 | 0 | 0                 |
| 0 | 1 | 0 | 0 | 0                 |
| 0 | 0 | 0 | 1 | 0 no answer given |

|   |   |   |   |               |
|---|---|---|---|---------------|
| 0 | 1 | 0 | 0 | 0             |
| 0 | 0 | 0 | 0 | 1             |
| 0 | 1 | 0 | 0 | 0             |
| 0 | 1 | 0 | 0 | 0             |
| 0 | 1 | 0 | 0 | 0             |
| 0 | 0 | 0 | 0 | 1             |
| 0 | 0 | 0 | 0 | 1             |
| 0 | 1 | 0 | 0 | 0             |
| 0 | 1 | 0 | 0 | 0             |
| 0 | 0 | 0 | 0 | 1             |
| 0 | 1 | 0 | 0 | 0             |
| 0 | 0 | 1 | 0 | 0             |
| 0 | 0 | 0 | 0 | 1             |
| 0 | 0 | 0 | 0 | 1             |
| 0 | 1 | 0 | 0 | 0             |
| 0 | 0 | 0 | 0 | 1             |
| 0 | 0 | 0 | 1 | 0 Hispanic    |
| 0 | 0 | 0 | 0 | 1             |
| 0 | 0 | 0 | 0 | 1             |
| 0 | 0 | 0 | 0 | 1             |
| 0 | 1 | 0 | 0 | 0             |
| 0 | 0 | 0 | 0 | 1             |
| 0 | 0 | 0 | 0 | 1             |
| 0 | 1 | 0 | 0 | 0             |
| 0 | 0 | 0 | 1 | 0 No Response |
| 0 | 0 | 0 | 0 | 0             |
| 0 | 0 | 0 | 0 | 0             |
| 0 | 0 | 0 | 0 | 1             |
| 0 | 0 | 0 | 0 | 0             |
| 0 | 1 | 0 | 0 | 0             |
| 0 | 0 | 0 | 0 | 1             |
| 0 | 1 | 0 | 1 | 0 Mexican     |
| 0 | 0 | 0 | 0 | 0             |
| 0 | 1 | 0 | 0 | 0             |
| 0 | 1 | 0 | 0 | 0             |
| 0 | 0 | 0 | 0 | 0             |
| 0 | 1 | 0 | 0 | 0             |
| 0 | 0 | 0 | 0 | 1             |
| 0 | 1 | 0 | 0 | 0             |
| 0 | 0 | 0 | 0 | 0             |
| 0 | 1 | 0 | 0 | 0             |
| 0 | 0 | 0 | 0 | 1             |
| 0 | 0 | 0 | 1 | 0 No Response |
| 0 | 0 | 0 | 0 | 0             |
| 0 | 0 | 0 | 0 | 1             |
| 0 | 0 | 0 | 0 | 1             |
| 0 | 0 | 0 | 0 | 1             |

|   |   |   |   |   |                        |
|---|---|---|---|---|------------------------|
| 0 | 1 | 0 | 0 | 0 |                        |
| 0 | 0 | 0 | 1 | 0 | Hispanic               |
| 0 | 1 | 0 | 0 | 0 |                        |
| 0 | 0 | 0 | 0 | 1 |                        |
| 0 | 0 | 0 | 0 | 1 |                        |
| 0 | 0 | 0 | 0 | 1 |                        |
| 0 | 1 | 0 | 0 | 0 |                        |
| 0 | 1 | 0 | 0 | 0 |                        |
| 0 | 1 | 0 | 0 | 0 |                        |
| 0 | 0 | 0 | 0 | 1 |                        |
| 0 | 0 | 0 | 0 | 1 |                        |
| 0 | 0 | 0 | 0 | 1 |                        |
| 0 | 1 | 0 | 1 | 0 | American               |
| 0 | 0 | 0 | 0 | 0 |                        |
| 0 | 1 | 0 | 0 | 0 |                        |
| 0 | 0 | 0 | 0 | 1 |                        |
| 0 | 0 | 0 | 0 | 0 |                        |
| 0 | 0 | 0 | 1 | 0 | Hispanic               |
| 0 | 0 | 0 | 0 | 1 |                        |
| 0 | 0 | 0 | 0 | 1 |                        |
| 0 | 0 | 0 | 1 | 0 | Mexicana and Americana |
| 0 | 0 | 0 | 1 | 0 | Hispanic/Latina        |
| 0 | 1 | 0 | 0 | 0 |                        |
| 0 | 0 | 0 | 0 | 1 |                        |
| 0 | 0 | 0 | 0 | 1 |                        |
| 1 | 1 | 0 | 0 | 0 |                        |
| 0 | 1 | 0 | 0 | 0 |                        |
| 0 | 0 | 0 | 0 | 1 |                        |
| 0 | 1 | 0 | 0 | 0 |                        |
| 0 | 1 | 1 | 0 | 0 |                        |
| 0 | 1 | 0 | 0 | 0 |                        |
| 0 | 0 | 1 | 0 | 0 |                        |
| 0 | 1 | 0 | 0 | 0 |                        |
| 0 | 0 | 0 | 0 | 1 |                        |
| 0 | 0 | 0 | 0 | 1 |                        |
| 0 | 1 | 0 | 0 | 0 |                        |
| 0 | 1 | 0 | 0 | 0 |                        |
| 0 | 1 | 0 | 0 | 0 |                        |
| 0 | 0 | 0 | 0 | 1 |                        |
| 0 | 1 | 0 | 0 | 0 |                        |
| 0 | 1 | 0 | 0 | 0 |                        |
| 0 | 0 | 0 | 0 | 1 |                        |
| 0 | 1 | 0 | 0 | 0 |                        |
| 0 | 1 | 0 | 0 | 0 |                        |
| 0 | 0 | 0 | 0 | 1 |                        |
| 0 | 1 | 0 | 0 | 0 |                        |
| 0 | 0 | 0 | 0 | 1 |                        |
| 0 | 1 | 0 | 0 | 0 |                        |

|   |   |   |   |                    |
|---|---|---|---|--------------------|
| 0 | 1 | 0 | 0 | 0                  |
| 0 | 0 | 0 | 0 | 0                  |
| 0 | 1 | 0 | 0 | 0                  |
| 0 | 1 | 0 | 0 | 0                  |
| 0 | 0 | 0 | 0 | 1                  |
| 0 | 0 | 0 | 0 | 1                  |
| 0 | 1 | 0 | 0 | 0                  |
| 0 | 0 | 0 | 0 | 0                  |
| 0 | 1 | 0 | 0 | 0                  |
| 0 | 0 | 0 | 0 | 1                  |
| 0 | 0 | 0 | 0 | 1                  |
| 0 | 0 | 0 | 0 | 0                  |
| 0 | 0 | 0 | 0 | 1                  |
| 0 | 1 | 0 | 0 | 0                  |
| 0 | 1 | 0 | 0 | 0                  |
| 0 | 1 | 0 | 1 | 0 Hispanic         |
| 0 | 1 | 0 | 0 | 0                  |
| 0 | 1 | 0 | 1 | 0 pordarican       |
| 0 | 0 | 0 | 0 | 1                  |
| 0 | 0 | 0 | 0 | 1                  |
| 0 | 1 | 0 | 0 | 0                  |
| 0 | 0 | 0 | 0 | 1                  |
| 0 | 0 | 0 | 0 | 1                  |
| 0 | 1 | 0 | 0 | 0                  |
| 0 | 0 | 0 | 0 | 1                  |
| 0 | 0 | 1 | 0 | 0                  |
| 0 | 0 | 1 | 0 | 0                  |
| 0 | 1 | 0 | 0 | 0                  |
| 0 | 1 | 0 | 0 | 0                  |
| 0 | 0 | 0 | 0 | 1                  |
| 0 | 1 | 0 | 0 | 0                  |
| 0 | 0 | 0 | 0 | 1                  |
| 0 | 1 | 0 | 0 | 0                  |
| 0 | 0 | 0 | 0 | 1                  |
| 0 | 0 | 0 | 1 | 0 Dominican        |
| 0 | 1 | 0 | 0 | 0                  |
| 0 | 1 | 0 | 0 | 0                  |
| 0 | 1 | 0 | 0 | 0                  |
| 0 | 0 | 0 | 1 | 0 Mexican American |
| 0 | 1 | 0 | 0 | 0                  |
| 0 | 1 | 0 | 0 | 0                  |
| 0 | 0 | 0 | 0 | 1                  |
| 0 | 1 | 0 | 0 | 0                  |
| 0 | 0 | 0 | 1 | 0 Idk              |
| 0 | 0 | 0 | 0 | 1                  |
| 0 | 0 | 0 | 0 | 1                  |

|   |   |   |   |                  |
|---|---|---|---|------------------|
| 0 | 1 | 0 | 0 | 0                |
| 0 | 1 | 0 | 1 | 0 Hispanic       |
| 0 | 1 | 0 | 0 | 0                |
| 0 | 1 | 0 | 0 | 0                |
| 0 | 0 | 0 | 0 | 1                |
| 0 | 0 | 0 | 0 | 1                |
| 0 | 1 | 0 | 0 | 0                |
| 0 | 1 | 0 | 0 | 0                |
| 0 | 1 | 0 | 0 | 0                |
| 0 | 1 | 0 | 0 | 0                |
| 0 | 0 | 0 | 0 | 1                |
| 0 | 1 | 0 | 0 | 0                |
| 0 | 1 | 0 | 0 | 0                |
| 0 | 1 | 0 | 0 | 0                |
| 0 | 0 | 0 | 1 | 0 Hispanic/White |
| 0 | 0 | 0 | 1 | 0 Hispanic       |
| 0 | 1 | 0 | 0 | 0                |
| 0 | 0 | 0 | 0 | 1                |
| 0 | 1 | 0 | 0 | 0                |
| 0 | 0 | 0 | 0 | 1                |
| 0 | 0 | 0 | 0 | 1                |
| 0 | 0 | 0 | 0 | 1                |
| 0 | 0 | 0 | 0 | 1                |
| 0 | 1 | 0 | 0 | 0                |
| 0 | 0 | 0 | 0 | 1                |
| 0 | 0 | 0 | 0 | 0                |
| 0 | 1 | 0 | 0 | 0                |
| 0 | 1 | 0 | 0 | 0                |
| 0 | 0 | 0 | 0 | 0                |
| 0 | 1 | 0 | 0 | 0                |
| 0 | 0 | 0 | 0 | 0                |
| 0 | 0 | 0 | 0 | 1                |
| 0 | 0 | 0 | 0 | 1                |
| 0 | 0 | 0 | 0 | 1                |
| 0 | 0 | 0 | 0 | 0                |
| 0 | 1 | 0 | 0 | 0                |
| 0 | 0 | 0 | 1 | 0 Hispanic       |
| 0 | 1 | 0 | 0 | 0                |
| 0 | 0 | 0 | 0 | 0                |
| 0 | 0 | 0 | 0 | 1                |
| 0 | 1 | 0 | 0 | 0                |
| 0 | 1 | 0 | 0 | 0                |
| 0 | 0 | 0 | 0 | 1                |
| 0 | 0 | 0 | 1 | 0 Latino         |
| 0 | 0 | 0 | 0 | 0                |
| 0 | 1 | 0 | 0 | 0                |



|   |   |   |   |                           |
|---|---|---|---|---------------------------|
| 0 | 1 | 0 | 0 | 0                         |
| 0 | 0 | 0 | 1 | 0 Half white and hispanic |
| 0 | 0 | 0 | 0 | 1                         |
| 0 | 1 | 0 | 1 | 0 No Response             |
| 0 | 1 | 0 | 0 | 0                         |
| 1 | 1 | 0 | 0 | 0                         |
| 0 | 0 | 0 | 1 | 0 No Response             |
| 0 | 0 | 0 | 0 | 1                         |
| 0 | 0 | 0 | 0 | 1                         |
| 0 | 0 | 0 | 0 | 1                         |
| 0 | 1 | 0 | 0 | 0                         |
| 0 | 1 | 1 | 0 | 0                         |
| 0 | 1 | 0 | 0 | 0                         |
| 0 | 0 | 0 | 0 | 1                         |
| 0 | 0 | 0 | 1 | 0 Toaster                 |
| 0 | 0 | 0 | 0 | 1                         |
| 0 | 1 | 0 | 0 | 0                         |
| 0 | 0 | 0 | 1 | 0 Hispanic                |
| 0 | 0 | 0 | 0 | 1                         |
| 0 | 0 | 0 | 0 | 1                         |
| 0 | 0 | 0 | 0 | 1                         |
| 0 | 1 | 0 | 0 | 0                         |
| 0 | 0 | 0 | 0 | 1                         |
| 0 | 0 | 0 | 0 | 1                         |
| 0 | 0 | 0 | 1 | 0 No Response             |
| 0 | 0 | 0 | 1 | 0 Hispanic                |
| 0 | 0 | 0 | 0 | 1                         |
| 0 | 0 | 0 | 0 | 1                         |
| 0 | 0 | 0 | 0 | 1                         |
| 0 | 0 | 0 | 0 | 1                         |
| 0 | 1 | 0 | 0 | 0                         |
| 0 | 1 | 0 | 0 | 0                         |
| 0 | 1 | 0 | 0 | 0                         |
| 0 | 1 | 0 | 0 | 0                         |
| 0 | 0 | 0 | 0 | 1                         |
| 0 | 1 | 0 | 0 | 0                         |
| 0 | 0 | 0 | 0 | 1                         |
| 0 | 1 | 0 | 0 | 0                         |
| 0 | 1 | 0 | 0 | 0                         |
| 0 | 1 | 0 | 0 | 0                         |
| 0 | 0 | 0 | 1 | 0 Response                |
| 0 | 1 | 0 | 0 | 0                         |
| 0 | 1 | 0 | 0 | 0                         |
| 0 | 0 | 0 | 0 | 1                         |
| 0 | 1 | 0 | 0 | 0                         |
| 0 | 1 | 0 | 0 | 0                         |

|   |   |   |   |   |        |              |
|---|---|---|---|---|--------|--------------|
| 0 | 1 | 0 | 0 | 0 | 0      |              |
| 0 | 0 | 0 | 0 | 1 | 0      | Mexican      |
| 0 | 0 | 0 | 0 | 0 | 1      |              |
| 0 | 0 | 0 | 0 | 0 | #NULL! |              |
| 0 | 1 | 0 | 0 | 0 | #NULL! |              |
| 0 | 1 | 0 | 0 | 0 | #NULL! |              |
| 0 | 0 | 0 | 0 | 0 | #NULL! |              |
| 0 | 1 | 0 | 0 | 0 | #NULL! |              |
| 0 | 1 | 0 | 0 | 0 | #NULL! |              |
| 0 | 0 | 0 | 0 | 0 | #NULL! |              |
| 0 | 0 | 0 | 0 | 1 | #NULL! |              |
| 0 | 1 | 0 | 0 | 0 | #NULL! |              |
| 0 | 1 | 0 | 0 | 0 | #NULL! |              |
| 0 | 1 | 0 | 0 | 0 | #NULL! |              |
| 0 | 1 | 0 | 0 | 0 | #NULL! |              |
| 0 | 0 | 0 | 0 | 1 | #NULL! | Mexican      |
| 0 | 0 | 0 | 0 | 1 | #NULL! | Hispanic     |
| 0 | 1 | 0 | 0 | 0 | #NULL! |              |
| 0 | 1 | 0 | 0 | 0 | #NULL! |              |
| 0 | 0 | 0 | 0 | 1 | #NULL! | bi-racial    |
| 0 | 1 | 0 | 0 | 0 | #NULL! |              |
| 0 | 0 | 0 | 0 | 1 | #NULL! |              |
| 0 | 0 | 0 | 0 | 1 | #NULL! | hispanic     |
| 0 | 0 | 0 | 0 | 1 | #NULL! | mexican      |
| 0 | 1 | 0 | 0 | 0 | #NULL! |              |
| 0 | 0 | 0 | 0 | 1 | #NULL! | Hispanic     |
| 0 | 1 | 0 | 0 | 0 | #NULL! |              |
| 0 | 0 | 0 | 0 | 0 | #NULL! |              |
| 0 | 0 | 0 | 0 | 1 | #NULL! | Mexican      |
| 0 | 0 | 0 | 0 | 1 | #NULL! | 100% mexican |
| 0 | 0 | 0 | 0 | 1 | #NULL! | Hispanic     |
| 0 | 1 | 0 | 0 | 0 | #NULL! |              |
| 0 | 1 | 0 | 0 | 0 | #NULL! |              |
| 0 | 0 | 0 | 0 | 1 | #NULL! | hispaanic    |
| 0 | 1 | 0 | 0 | 0 | #NULL! |              |
| 0 | 0 | 0 | 0 | 1 | #NULL! | latino       |
| 0 | 0 | 0 | 0 | 1 | #NULL! | I'm Hispanic |
| 0 | 1 | 0 | 0 | 0 | #NULL! |              |
| 0 | 0 | 0 | 0 | 1 | #NULL! | hispanic     |
| 0 | 1 | 0 | 0 | 0 | #NULL! |              |
| 0 | 0 | 0 | 0 | 1 | #NULL! | mexican      |
| 0 | 1 | 0 | 0 | 0 | #NULL! |              |
| 0 | 1 | 0 | 0 | 0 | #NULL! |              |
| 0 | 1 | 0 | 0 | 0 | #NULL! |              |
| 0 | 0 | 0 | 0 | 1 | #NULL! | hispanic     |

|   |   |   |   |        |                            |
|---|---|---|---|--------|----------------------------|
| 0 | 0 | 0 | 1 | #NULL! |                            |
| 0 | 1 | 0 | 0 | #NULL! |                            |
| 0 | 1 | 0 | 0 | #NULL! |                            |
| 0 | 1 | 0 | 0 | #NULL! |                            |
| 0 | 1 | 0 | 1 | #NULL! | native Irish and american. |
| 0 | 1 | 0 | 0 | #NULL! |                            |
| 0 | 1 | 0 | 0 | #NULL! |                            |
| 0 | 1 | 0 | 0 | #NULL! |                            |
| 0 | 1 | 0 | 0 | #NULL! |                            |
| 0 | 1 | 0 | 0 | #NULL! |                            |
| 0 | 0 | 0 | 1 | #NULL! |                            |
| 0 | 0 | 0 | 1 | #NULL! | hispanic                   |
| 0 | 1 | 0 | 0 | #NULL! |                            |
| 0 | 1 | 0 | 0 | #NULL! |                            |
| 0 | 0 | 0 | 1 | #NULL! | hispanic                   |
| 0 | 1 | 0 | 0 | #NULL! |                            |
| 0 | 0 | 0 | 1 | #NULL! | hispanic                   |
| 0 | 0 | 0 | 1 | #NULL! | hispanic                   |
| 0 | 0 | 0 | 0 | #NULL! |                            |
| 0 | 0 | 0 | 0 | #NULL! |                            |
| 0 | 0 | 0 | 1 | #NULL! | hispanic                   |
| 0 | 0 | 0 | 1 | #NULL! | mexican                    |
| 0 | 0 | 0 | 1 | #NULL! | Hispanic                   |
| 0 | 0 | 0 | 1 | #NULL! | fish                       |
| 0 | 1 | 0 | 0 | #NULL! |                            |
| 0 | 1 | 0 | 0 | #NULL! |                            |
| 0 | 1 | 0 | 0 | #NULL! |                            |
| 0 | 0 | 0 | 1 | #NULL! |                            |
| 0 | 1 | 0 | 0 | #NULL! |                            |
| 0 | 0 | 0 | 1 | #NULL! | Hispanic                   |
| 0 | 1 | 0 | 0 | #NULL! |                            |
| 0 | 1 | 0 | 0 | #NULL! |                            |
| 0 | 0 | 0 | 1 | #NULL! | Hispanic                   |
| 0 | 1 | 0 | 0 | #NULL! |                            |
| 0 | 0 | 0 | 1 | #NULL! | other                      |
| 0 | 1 | 0 | 0 | #NULL! |                            |
| 0 | 0 | 0 | 1 | #NULL! | Hispanic                   |
| 0 | 0 | 0 | 1 | #NULL! | mexica                     |
| 0 | 0 | 0 | 1 | #NULL! | American                   |
| 0 | 1 | 0 | 0 | #NULL! |                            |
| 0 | 0 | 0 | 1 | #NULL! | Hispanic                   |
| 0 | 0 | 0 | 1 | #NULL! | hispanic                   |
| 0 | 1 | 0 | 0 | #NULL! |                            |
| 0 | 1 | 0 | 0 | #NULL! |                            |
| 0 | 1 | 0 | 0 | #NULL! |                            |
| 0 | 0 | 0 | 1 | #NULL! | Hispanic                   |
| 0 | 0 | 0 | 1 | #NULL! | hispanic                   |

|   |   |   |   |        |                      |
|---|---|---|---|--------|----------------------|
| 0 | 1 | 0 | 0 | #NULL! |                      |
| 0 | 0 | 0 | 1 | #NULL! | Hispanic             |
| 0 | 1 | 0 | 0 | #NULL! |                      |
| 0 | 0 | 0 | 1 | #NULL! | Hispanic             |
| 0 | 0 | 0 | 1 | #NULL! | hispanic             |
| 0 | 0 | 0 | 1 | #NULL! | Hispanic             |
| 0 | 0 | 0 | 1 | #NULL! | Hispanic             |
| 0 | 0 | 0 | 1 | #NULL! | hispanic             |
| 0 | 0 | 0 | 1 | #NULL! | Hispanic             |
| 0 | 1 | 0 | 0 | #NULL! |                      |
| 0 | 1 | 0 | 0 | #NULL! |                      |
| 0 | 1 | 0 | 0 | #NULL! |                      |
| 0 | 0 | 0 | 1 | #NULL! | hispanic             |
| 0 | 0 | 0 | 1 | #NULL! | I'm not any of those |
| 0 | 1 | 0 | 0 | #NULL! |                      |
| 0 | 0 | 0 | 0 | #NULL! |                      |
| 0 | 0 | 0 | 1 | #NULL! |                      |
| 0 | 1 | 0 | 0 | #NULL! |                      |
| 0 | 1 | 0 | 0 | #NULL! |                      |
| 0 | 1 | 0 | 0 | #NULL! |                      |
| 0 | 0 | 0 | 1 | #NULL! | Hispanic             |

|  | living_pre | living_other_pre | ace_div_pre | ace_die_pre | ace_jail_pre | ace_ill_pre | ace_drug_pre |
|--|------------|------------------|-------------|-------------|--------------|-------------|--------------|
|  | 1          | #NULL!           | 0           | 0           | 0            | 0           | 0            |
|  | 1          | #NULL!           | 0           | 0           | 0            | 0           | 0            |
|  | 7          | #NULL!           | 0           | 0           | 0            | 0           | 0            |
|  | 2          | #NULL!           | 0           | 1           | 1            | 0           | 99           |
|  | 2          | #NULL!           | 0           | 0           | 0            | 0           | 0            |
|  | 1          | #NULL!           | 99          | 99          | 0            | 99          | 1            |
|  | 7          | #NULL!           | 0           | 0           | 0            | 0           | 1            |
|  | 1          | #NULL!           | 0           | 0           | 0            | 0           | 1            |
|  | 1          | #NULL!           | 0           | 0           | 1            | 0           | 0            |
|  | 5          | #NULL!           | 0           | 0           | 1            | 1           | 1            |
|  | 4          | #NULL!           | 1           | 0           | 1            | 0           | 1            |
|  | 1          | #NULL!           | 0           | 0           | 1            | 0           | 0            |
|  | 1          | #NULL!           | 1           | 0           | 1            | 0           | 0            |
|  | 1          | #NULL!           | 0           | 0           | 0            | 0           | 0            |
|  | 5          | #NULL!           | 0           | 0           | 0            | 0           | 0            |
|  | 2          | #NULL!           | 1           | 0           | 1            | 0           | 0            |
|  | 1          | #NULL!           | 0           | 0           | 0            | 0           | 0            |
|  | 4          | #NULL!           | 1           | 0           | 99           | 0           | 99           |
|  | 4          | #NULL!           | 1           | 99          | 99           | 99          | 99           |
|  | 4          | #NULL!           | 0           | 0           | 1            | 1           | 0            |
|  | 2          | #NULL!           | 0           | 1           | 1            | 99          | 99           |
|  | 1          | #NULL!           | 99          | 99          | 99           | 99          | 99           |
|  | 1          | #NULL!           | 99          | 99          | 99           | 99          | 99           |
|  | 2          | #NULL!           | 0           | 0           | 0            | 0           | 0            |
|  | 7          | #NULL!           | 0           | 0           | 0            | 0           | 0            |
|  | 1          | #NULL!           | 0           | 0           | 0            | 0           | 0            |
|  | 4          | #NULL!           | 1           | 0           | 0            | 0           | 0            |
|  | 4          | #NULL!           | 1           | 1           | 0            | 0           | 1            |
|  | 1          | #NULL!           | 0           | 0           | 0            | 0           | 0            |
|  | 4          | #NULL!           | 1           | 0           | 1            | 0           | 0            |
|  | 1          | #NULL!           | 0           | 0           | 1            | 0           | 1            |
|  | 2          | #NULL!           | 1           | 0           | 1            | 0           | 1            |
|  | 2          | #NULL!           | 0           | 0           | 1            | 1           | 0            |
|  | 1          | #NULL!           | 0           | 0           | 0            | 0           | 0            |
|  | 99         | #NULL!           | 0           | 0           | 0            | 99          | 0            |
|  | 1          | #NULL!           | 0           | 0           | 0            | 1           | 0            |
|  | 7          | #NULL!           | 1           | 0           | 0            | 1           | 0            |
|  | 1          | #NULL!           | 0           | 0           | 0            | 0           | 0            |
|  | 7          | #NULL!           | 1           | 0           | 1            | 1           | 1            |
|  | 2          | #NULL!           | 1           | 0           | 1            | 0           | 1            |
|  | 1          | #NULL!           | 0           | 99          | 0            | 0           | 99           |
|  | 1          | #NULL!           | 0           | 0           | 0            | 0           | 0            |
|  | 1          | #NULL!           | 0           | 0           | 0            | 0           | 0            |
|  | 2          | #NULL!           | 1           | 0           | 0            | 0           | 0            |
|  | 1          | #NULL!           | 0           | 0           | 1            | 0           | 0            |
|  | 1          | #NULL!           | 1           | 0           | 0            | 0           | 0            |
|  | 4          | #NULL!           | 1           | 0           | 1            | 1           | 1            |

|   |        |   |   |    |   |   |
|---|--------|---|---|----|---|---|
| 1 | #NULL! | 0 | 1 | 0  | 0 | 0 |
| 1 | #NULL! | 0 | 0 | 0  | 1 | 0 |
| 1 | #NULL! | 0 | 0 | 1  | 0 | 0 |
| 4 | #NULL! | 1 | 0 | 1  | 0 | 0 |
| 1 | #NULL! | 0 | 0 | 1  | 0 | 1 |
| 2 | #NULL! | 0 | 0 | 1  | 0 | 0 |
| 1 | #NULL! | 0 | 0 | 1  | 0 | 1 |
| 3 | #NULL! | 1 | 1 | 1  | 1 | 1 |
| 2 | #NULL! | 0 | 0 | 0  | 0 | 0 |
| 4 | #NULL! | 1 | 0 | 1  | 0 | 0 |
| 1 | #NULL! | 0 | 0 | 0  | 0 | 0 |
| 1 | #NULL! | 0 | 0 | 0  | 0 | 0 |
| 1 | #NULL! | 0 | 0 | 0  | 0 | 0 |
| 5 | #NULL! | 1 | 0 | 1  | 1 | 1 |
| 2 | #NULL! | 1 | 0 | 1  | 0 | 0 |
| 2 | #NULL! | 0 | 0 | 1  | 0 | 1 |
| 2 | #NULL! | 1 | 0 | 0  | 0 | 1 |
| 1 | #NULL! | 1 | 0 | 1  | 0 | 1 |
| 4 | #NULL! | 1 | 0 | 0  | 1 | 1 |
| 4 | #NULL! | 1 | 0 | 0  | 0 | 0 |
| 4 | #NULL! | 1 | 0 | 1  | 0 | 0 |
| 1 | #NULL! | 0 | 0 | 0  | 0 | 0 |
| 4 | #NULL! | 1 | 0 | 0  | 0 | 1 |
| 4 | #NULL! | 1 | 0 | 0  | 0 | 1 |
| 1 | #NULL! | 0 | 0 | 0  | 0 | 0 |
| 1 | #NULL! | 0 | 1 | 0  | 0 | 0 |
| 1 | #NULL! | 1 | 0 | 0  | 0 | 1 |
| 1 | #NULL! | 0 | 0 | 0  | 0 | 1 |
| 1 | #NULL! | 0 | 0 | 0  | 0 | 0 |
| 1 | #NULL! | 0 | 0 | 0  | 0 | 0 |
| 4 | #NULL! | 1 | 0 | 0  | 0 | 0 |
| 1 | #NULL! | 0 | 0 | 0  | 0 | 0 |
| 2 | #NULL! | 1 | 0 | 1  | 1 | 0 |
| 5 | #NULL! | 0 | 0 | 1  | 0 | 0 |
| 4 | #NULL! | 0 | 0 | 0  | 0 | 0 |
| 2 | #NULL! | 1 | 0 | 1  | 0 | 0 |
| 1 | #NULL! | 0 | 0 | 0  | 0 | 0 |
| 1 | #NULL! | 0 | 0 | 1  | 1 | 0 |
| 1 | #NULL! | 0 | 0 | 0  | 0 | 0 |
| 1 | #NULL! | 0 | 0 | 0  | 0 | 0 |
| 1 | #NULL! | 0 | 0 | 0  | 0 | 0 |
| 1 | #NULL! | 0 | 0 | 0  | 0 | 0 |
| 4 | #NULL! | 1 | 1 | 1  | 1 | 1 |
| 1 | #NULL! | 0 | 0 | 99 | 0 | 0 |
| 1 | #NULL! | 0 | 0 | 0  | 0 | 0 |
| 5 | #NULL! | 0 | 0 | 1  | 0 | 0 |
| 4 | #NULL! | 1 | 0 | 1  | 0 | 1 |
| 4 | #NULL! | 1 | 0 | 1  | 1 | 1 |

|   |        |   |   |    |   |   |
|---|--------|---|---|----|---|---|
| 1 | #NULL! | 0 | 1 | 0  | 0 | 0 |
| 5 | #NULL! | 1 | 0 | 1  | 0 | 1 |
| 2 | #NULL! | 0 | 0 | 1  | 1 | 0 |
| 1 | #NULL! | 0 | 0 | 0  | 0 | 0 |
| 1 | #NULL! | 0 | 0 | 0  | 0 | 0 |
| 1 | #NULL! | 0 | 0 | 0  | 0 | 0 |
| 2 | #NULL! | 1 | 0 | 1  | 1 | 1 |
| 1 | #NULL! | 0 | 0 | 0  | 0 | 0 |
| 1 | #NULL! | 0 | 0 | 0  | 0 | 0 |
| 4 | #NULL! | 1 | 1 | 1  | 1 | 1 |
| 1 | #NULL! | 1 | 0 | 1  | 0 | 0 |
| 7 | #NULL! | 0 | 0 | 0  | 1 | 1 |
| 4 | #NULL! | 1 | 1 | 1  | 1 | 1 |
| 1 | #NULL! | 0 | 0 | 1  | 0 | 0 |
| 1 | #NULL! | 0 | 0 | 0  | 0 | 0 |
| 4 | #NULL! | 1 | 0 | 1  | 0 | 1 |
| 1 | #NULL! | 0 | 0 | 0  | 1 | 1 |
| 1 | #NULL! | 0 | 0 | 0  | 0 | 1 |
| 1 | #NULL! | 0 | 0 | 0  | 0 | 0 |
| 1 | #NULL! | 0 | 0 | 0  | 0 | 0 |
| 2 | #NULL! | 1 | 1 | 1  | 0 | 1 |
| 4 | #NULL! | 0 | 0 | 1  | 0 | 1 |
| 1 | #NULL! | 1 | 1 | 1  | 1 | 1 |
| 2 | #NULL! | 1 | 0 | 0  | 0 | 0 |
| 1 | #NULL! | 1 | 0 | 0  | 0 | 0 |
| 2 | #NULL! | 0 | 0 | 99 | 0 | 0 |
| 1 | #NULL! | 0 | 0 | 99 | 0 | 1 |
| 1 | #NULL! | 0 | 0 | 0  | 0 | 0 |
| 1 | #NULL! | 0 | 0 | 0  | 0 | 0 |
| 1 | #NULL! | 0 | 0 | 0  | 0 | 0 |
| 1 | #NULL! | 0 | 0 | 0  | 0 | 0 |
| 1 | #NULL! | 1 | 0 | 0  | 0 | 1 |
| 1 | #NULL! | 0 | 0 | 0  | 0 | 1 |
| 1 | #NULL! | 0 | 0 | 0  | 0 | 0 |
| 4 | #NULL! | 0 | 0 | 0  | 0 | 0 |
| 4 | #NULL! | 0 | 0 | 0  | 0 | 0 |
| 2 | #NULL! | 1 | 0 | 0  | 0 | 0 |
| 4 | #NULL! | 0 | 0 | 1  | 0 | 1 |
| 1 | #NULL! | 0 | 0 | 0  | 0 | 0 |
| 7 | #NULL! | 0 | 0 | 0  | 0 | 0 |
| 2 | #NULL! | 1 | 0 | 0  | 0 | 0 |
| 1 | #NULL! | 0 | 0 | 0  | 0 | 0 |
| 2 | #NULL! | 1 | 0 | 0  | 0 | 0 |
| 1 | #NULL! | 0 | 0 | 1  | 0 | 0 |
| 2 | #NULL! | 0 | 0 | 1  | 0 | 0 |
| 1 | #NULL! | 0 | 0 | 0  | 0 | 0 |
| 5 | #NULL! | 0 | 1 | 1  | 1 | 1 |
| 4 | #NULL! | 1 | 0 | 0  | 0 | 0 |

|    |        |    |    |    |    |    |
|----|--------|----|----|----|----|----|
| 4  | #NULL! | 99 | 99 | 1  | 99 | 99 |
| 1  | #NULL! | 0  | 0  | 0  | 0  | 0  |
| 7  | #NULL! | 0  | 1  | 1  | 0  | 0  |
| 4  | #NULL! | 1  | 0  | 1  | 99 | 1  |
| 7  | #NULL! | 0  | 99 | 1  | 0  | 1  |
| 4  | #NULL! | 0  | 0  | 1  | 0  | 0  |
| 1  | #NULL! | 0  | 0  | 1  | 99 | 0  |
| 1  | #NULL! | 0  | 0  | 0  | 0  | 0  |
| 1  | #NULL! | 0  | 0  | 0  | 0  | 0  |
| 2  | #NULL! | 0  | 0  | 1  | 0  | 1  |
| 1  | #NULL! | 0  | 0  | 0  | 0  | 0  |
| 99 | #NULL! | 0  | 0  | 0  | 0  | 0  |
| 1  | #NULL! | 0  | 0  | 0  | 0  | 0  |
| 1  | #NULL! | 0  | 0  | 0  | 0  | 0  |
| 2  | #NULL! | 0  | 0  | 0  | 0  | 0  |
| 1  | #NULL! | 0  | 0  | 0  | 0  | 0  |
| 1  | #NULL! | 0  | 0  | 0  | 1  | 1  |
| 4  | #NULL! | 1  | 0  | 0  | 0  | 0  |
| 2  | #NULL! | 1  | 0  | 1  | 0  | 0  |
| 1  | #NULL! | 0  | 0  | 0  | 0  | 1  |
| 2  | #NULL! | 1  | 0  | 0  | 0  | 0  |
| 1  | #NULL! | 0  | 0  | 0  | 0  | 0  |
| 5  | #NULL! | 1  | 0  | 1  | 0  | 1  |
| 2  | #NULL! | 1  | 0  | 0  | 0  | 0  |
| 1  | #NULL! | 0  | 0  | 0  | 0  | 0  |
| 4  | #NULL! | 1  | 0  | 0  | 0  | 0  |
| 1  | #NULL! | 1  | 0  | 1  | 0  | 0  |
| 1  | #NULL! | 0  | 0  | 99 | 0  | 0  |
| 3  | #NULL! | 1  | 0  | 0  | 0  | 0  |
| 4  | #NULL! | 0  | 0  | 0  | 0  | 0  |
| 1  | #NULL! | 0  | 0  | 0  | 0  | 0  |
| 1  | #NULL! | 0  | 0  | 0  | 0  | 0  |
| 1  | #NULL! | 1  | 1  | 1  | 1  | 1  |
| 1  | #NULL! | 0  | 0  | 0  | 0  | 0  |
| 5  | #NULL! | 0  | 0  | 1  | 0  | 1  |
| 1  | #NULL! | 1  | 1  | 0  | 1  | 0  |
| 7  | #NULL! | 1  | 0  | 0  | 0  | 0  |
| 1  | #NULL! | 0  | 0  | 0  | 0  | 0  |
| 3  | #NULL! | 1  | 1  | 0  | 0  | 0  |
| 2  | #NULL! | 1  | 0  | 0  | 0  | 0  |
| 1  | #NULL! | 0  | 0  | 1  | 1  | 1  |
| 1  | #NULL! | 0  | 0  | 0  | 0  | 0  |
| 3  | #NULL! | 1  | 0  | 0  | 0  | 0  |
| 4  | #NULL! | 1  | 0  | 1  | 1  | 1  |
| 1  | #NULL! | 0  | 0  | 0  | 0  | 0  |
| 4  | #NULL! | 1  | 0  | 1  | 0  | 1  |
| 6  | #NULL! | 0  | 0  | 1  | 0  | 1  |
| 5  | #NULL! | 0  | 1  | 1  | 0  | 0  |



|    |        |    |    |    |    |    |
|----|--------|----|----|----|----|----|
| 2  | #NULL! | 1  | 0  | 0  | 0  | 0  |
| 1  | #NULL! | 1  | 0  | 1  | 0  | 0  |
| 1  | #NULL! | 1  | 0  | 1  | 0  | 1  |
| 99 | #NULL! | 0  | 0  | 0  | 0  | 0  |
| 4  | #NULL! | 1  | 0  | 0  | 0  | 0  |
| 1  | #NULL! | 0  | 0  | 0  | 0  | 0  |
| 2  | #NULL! | 1  | 0  | 0  | 0  | 0  |
| 1  | #NULL! | 0  | 0  | 1  | 1  | 1  |
| 1  | #NULL! | 0  | 1  | 0  | 0  | 0  |
| 5  | #NULL! | 0  | 0  | 1  | 1  | 1  |
| 4  | #NULL! | 1  | 1  | 1  | 1  | 1  |
| 1  | #NULL! | 0  | 0  | 0  | 0  | 0  |
| 2  | #NULL! | 1  | 0  | 1  | 1  | 1  |
| 2  | #NULL! | 1  | 1  | 0  | 1  | 1  |
| 1  | #NULL! | 0  | 0  | 0  | 0  | 0  |
| 1  | #NULL! | 0  | 0  | 1  | 1  | 0  |
| 4  | #NULL! | 1  | 0  | 0  | 0  | 1  |
| 2  | #NULL! | 1  | 1  | 1  | 0  | 0  |
| 1  | #NULL! | 0  | 0  | 0  | 0  | 0  |
| 3  | #NULL! | 0  | 0  | 1  | 0  | 1  |
| 1  | #NULL! | 0  | 0  | 0  | 0  | 1  |
| 1  | #NULL! | 0  | 0  | 0  | 0  | 0  |
| 2  | #NULL! | 1  | 0  | 0  | 0  | 0  |
| 1  | #NULL! | 0  | 0  | 0  | 0  | 0  |
| 5  | #NULL! | 1  | 0  | 1  | 1  | 1  |
| 4  | #NULL! | 1  | 1  | 1  | 1  | 0  |
| 1  | #NULL! | 0  | 0  | 1  | 0  | 1  |
| 4  | #NULL! | 1  | 0  | 0  | 0  | 0  |
| 1  | #NULL! | 0  | 0  | 0  | 0  | 0  |
| 1  | #NULL! | 0  | 0  | 1  | 0  | 0  |
| 1  | #NULL! | 0  | 0  | 0  | 1  | 0  |
| 4  | #NULL! | 1  | 0  | 1  | 1  | 1  |
| 1  | #NULL! | 0  | 0  | 1  | 0  | 0  |
| 7  | #NULL! | 0  | 1  | 1  | 1  | 1  |
| 4  | #NULL! | 0  | 0  | 1  | 1  | 1  |
| 4  | #NULL! | 1  | 0  | 1  | 1  | 1  |
| 5  | #NULL! | 0  | 0  | 0  | 0  | 0  |
| 2  | #NULL! | 1  | 1  | 0  | 0  | 0  |
| 1  | #NULL! | 0  | 0  | 0  | 0  | 0  |
| 1  | #NULL! | 1  | 1  | 0  | 0  | 0  |
| 1  | #NULL! | 99 | 99 | 99 | 99 | 99 |
| 4  | #NULL! | 1  | 0  | 1  | 0  | 1  |
| 4  | #NULL! | 1  | 0  | 1  | 0  | 1  |
| 1  | #NULL! | 1  | 0  | 0  | 0  | 0  |
| 4  | #NULL! | 1  | 1  | 1  | 1  | 1  |
| 2  | #NULL! | 1  | 0  | 1  | 0  | 0  |
| 1  | #NULL! | 0  | 0  | 0  | 1  | 0  |
| 1  | #NULL! | 0  | 0  | 0  | 0  | 0  |

|   |        |   |   |    |    |   |
|---|--------|---|---|----|----|---|
| 6 | #NULL! | 1 | 0 | 1  | 0  | 1 |
| 1 | #NULL! | 0 | 0 | 0  | 0  | 0 |
| 1 | #NULL! | 0 | 0 | 0  | 1  | 0 |
| 1 | #NULL! | 0 | 0 | 1  | 0  | 0 |
| 1 | #NULL! | 0 | 0 | 0  | 0  | 1 |
| 1 | #NULL! | 0 | 0 | 0  | 0  | 0 |
| 1 | #NULL! | 0 | 0 | 0  | 0  | 0 |
| 2 | #NULL! | 1 | 0 | 1  | 1  | 0 |
| 1 | #NULL! | 0 | 0 | 0  | 0  | 0 |
| 4 | #NULL! | 1 | 0 | 0  | 0  | 0 |
| 1 | #NULL! | 0 | 0 | 0  | 0  | 0 |
| 1 | #NULL! | 0 | 0 | 0  | 0  | 0 |
| 1 | #NULL! | 0 | 0 | 0  | 0  | 0 |
| 1 | #NULL! | 0 | 0 | 1  | 0  | 1 |
| 1 | #NULL! | 0 | 0 | 0  | 0  | 0 |
| 4 | #NULL! | 0 | 0 | 1  | 1  | 1 |
| 2 | #NULL! | 1 | 0 | 1  | 1  | 1 |
| 1 | #NULL! | 0 | 0 | 0  | 0  | 1 |
| 4 | #NULL! | 1 | 0 | 1  | 99 | 1 |
| 1 | #NULL! | 1 | 0 | 0  | 0  | 0 |
| 1 | #NULL! | 0 | 0 | 0  | 0  | 0 |
| 1 | #NULL! | 1 | 0 | 0  | 99 | 0 |
| 1 | #NULL! | 0 | 0 | 1  | 0  | 0 |
| 1 | #NULL! | 0 | 1 | 0  | 0  | 0 |
| 5 | #NULL! | 1 | 1 | 0  | 0  | 1 |
| 1 | #NULL! | 0 | 0 | 0  | 0  | 0 |
| 1 | #NULL! | 0 | 0 | 0  | 0  | 0 |
| 1 | #NULL! | 0 | 0 | 1  | 0  | 0 |
| 7 | #NULL! | 0 | 0 | 1  | 1  | 1 |
| 2 | #NULL! | 1 | 0 | 0  | 0  | 0 |
| 3 | #NULL! | 1 | 0 | 0  | 0  | 0 |
| 1 | #NULL! | 0 | 0 | 0  | 0  | 1 |
| 4 | #NULL! | 1 | 0 | 1  | 0  | 0 |
| 1 | #NULL! | 0 | 0 | 1  | 0  | 0 |
| 2 | #NULL! | 1 | 0 | 0  | 0  | 0 |
| 5 | #NULL! | 0 | 0 | 0  | 0  | 0 |
| 1 | #NULL! | 0 | 0 | 0  | 0  | 0 |
| 1 | #NULL! | 0 | 0 | 1  | 0  | 0 |
| 1 | #NULL! | 0 | 0 | 0  | 0  | 0 |
| 4 | #NULL! | 0 | 0 | 1  | 0  | 1 |
| 4 | #NULL! | 1 | 0 | 1  | 1  | 1 |
| 1 | #NULL! | 0 | 0 | 0  | 0  | 0 |
| 1 | #NULL! | 0 | 0 | 0  | 0  | 1 |
| 1 | #NULL! | 0 | 0 | 1  | 0  | 0 |
| 1 | #NULL! | 0 | 0 | 0  | 0  | 0 |
| 1 | #NULL! | 0 | 0 | 1  | 0  | 1 |
| 4 | #NULL! | 1 | 0 | 99 | 1  | 0 |
| 4 | #NULL! | 1 | 0 | 1  | 1  | 0 |

|   |        |   |   |    |    |   |
|---|--------|---|---|----|----|---|
| 1 | #NULL! | 0 | 0 | 0  | 0  | 0 |
| 4 | #NULL! | 1 | 0 | 0  | 0  | 0 |
| 5 | #NULL! | 0 | 0 | 1  | 0  | 1 |
| 4 | #NULL! | 1 | 0 | 1  | 0  | 0 |
| 4 | #NULL! | 0 | 0 | 0  | 0  | 1 |
| 1 | #NULL! | 0 | 0 | 0  | 0  | 0 |
| 4 | #NULL! | 1 | 0 | 1  | 0  | 1 |
| 1 | #NULL! | 0 | 0 | 0  | 0  | 0 |
| 2 | #NULL! | 0 | 0 | 1  | 0  | 0 |
| 1 | #NULL! | 0 | 0 | 0  | 0  | 0 |
| 7 | #NULL! | 0 | 0 | 0  | 0  | 0 |
| 1 | #NULL! | 0 | 0 | 0  | 0  | 0 |
| 1 | #NULL! | 0 | 0 | 0  | 0  | 0 |
| 5 | #NULL! | 1 | 0 | 1  | 0  | 0 |
| 1 | #NULL! | 1 | 1 | 0  | 1  | 0 |
| 1 | #NULL! | 0 | 0 | 1  | 0  | 0 |
| 1 | #NULL! | 0 | 0 | 0  | 0  | 0 |
| 1 | #NULL! | 0 | 0 | 0  | 0  | 0 |
| 4 | #NULL! | 1 | 0 | 0  | 0  | 0 |
| 1 | #NULL! | 0 | 0 | 1  | 0  | 1 |
| 1 | #NULL! | 0 | 0 | 0  | 0  | 0 |
| 3 | #NULL! | 1 | 0 | 1  | 1  | 1 |
| 7 | #NULL! | 0 | 0 | 1  | 0  | 1 |
| 4 | #NULL! | 1 | 0 | 1  | 99 | 1 |
| 2 | #NULL! | 0 | 0 | 0  | 0  | 1 |
| 1 | #NULL! | 0 | 0 | 0  | 0  | 0 |
| 4 | #NULL! | 1 | 0 | 1  | 0  | 1 |
| 7 | #NULL! | 1 | 0 | 1  | 0  | 1 |
| 5 | #NULL! | 1 | 0 | 1  | 0  | 1 |
| 2 | #NULL! | 0 | 0 | 0  | 0  | 0 |
| 1 | #NULL! | 1 | 0 | 1  | 0  | 0 |
| 1 | #NULL! | 0 | 1 | 0  | 0  | 0 |
| 5 | #NULL! | 0 | 0 | 1  | 1  | 1 |
| 2 | #NULL! | 1 | 0 | 0  | 0  | 0 |
| 1 | #NULL! | 0 | 0 | 0  | 0  | 0 |
| 2 | #NULL! | 1 | 0 | 1  | 1  | 1 |
| 1 | #NULL! | 0 | 0 | 1  | 0  | 0 |
| 1 | #NULL! | 0 | 0 | 0  | 0  | 0 |
| 1 | #NULL! | 0 | 0 | 0  | 0  | 0 |
| 1 | #NULL! | 0 | 0 | 0  | 0  | 0 |
| 1 | #NULL! | 0 | 0 | 0  | 0  | 0 |
| 1 | #NULL! | 0 | 0 | 1  | 0  | 0 |
| 1 | #NULL! | 0 | 0 | 0  | 0  | 0 |
| 1 | #NULL! | 0 | 0 | 0  | 0  | 0 |
| 4 | #NULL! | 0 | 0 | 1  | 0  | 0 |
| 5 | #NULL! | 0 | 0 | 1  | 99 | 0 |
| 2 | #NULL! | 1 | 0 | 0  | 1  | 1 |
| 1 | #NULL! | 0 | 0 | 0  | 0  | 0 |
| 1 | #NULL! | 0 | 0 | 99 | 0  | 0 |
| 3 | #NULL! | 1 | 0 | 1  | 0  | 0 |
| 1 | #NULL! | 0 | 0 | 0  | 0  | 0 |

|    |        |   |   |    |   |   |
|----|--------|---|---|----|---|---|
| 1  | #NULL! | 0 | 0 | 0  | 0 | 0 |
| 2  | #NULL! | 1 | 0 | 1  | 0 | 1 |
| 1  | #NULL! | 0 | 1 | 1  | 0 | 0 |
| 3  | #NULL! | 1 | 0 | 1  | 1 | 1 |
| 1  | #NULL! | 0 | 0 | 0  | 0 | 0 |
| 99 | #NULL! | 0 | 0 | 0  | 0 | 0 |
| 4  | #NULL! | 1 | 0 | 1  | 0 | 1 |
| 4  | #NULL! | 0 | 0 | 1  | 0 | 1 |
| 4  | #NULL! | 1 | 1 | 1  | 0 | 1 |
| 1  | #NULL! | 0 | 0 | 0  | 0 | 0 |
| 2  | #NULL! | 0 | 0 | 1  | 0 | 0 |
| 1  | #NULL! | 0 | 0 | 0  | 0 | 0 |
| 2  | #NULL! | 1 | 0 | 1  | 1 | 1 |
| 2  | #NULL! | 1 | 0 | 1  | 1 | 0 |
| 4  | #NULL! | 1 | 0 | 0  | 0 | 1 |
| 1  | #NULL! | 0 | 0 | 0  | 0 | 1 |
| 1  | #NULL! | 0 | 0 | 1  | 0 | 1 |
| 2  | #NULL! | 1 | 0 | 0  | 0 | 0 |
| 1  | #NULL! | 0 | 0 | 0  | 0 | 0 |
| 1  | #NULL! | 0 | 0 | 0  | 0 | 0 |
| 1  | #NULL! | 0 | 0 | 0  | 0 | 0 |
| 99 | #NULL! | 1 | 0 | 1  | 1 | 1 |
| 2  | #NULL! | 1 | 0 | 0  | 1 | 0 |
| 1  | #NULL! | 1 | 0 | 1  | 0 | 0 |
| 99 | #NULL! | 0 | 0 | 1  | 0 | 0 |
| 1  | #NULL! | 0 | 0 | 0  | 0 | 0 |
| 1  | #NULL! | 0 | 0 | 0  | 0 | 0 |
| 99 | #NULL! | 0 | 0 | 0  | 0 | 0 |
| 1  | #NULL! | 0 | 0 | 0  | 0 | 0 |
| 2  | #NULL! | 1 | 0 | 0  | 0 | 0 |
| 1  | #NULL! | 0 | 0 | 0  | 0 | 0 |
| 1  | #NULL! | 0 | 0 | 0  | 0 | 0 |
| 1  | #NULL! | 0 | 0 | 0  | 0 | 0 |
| 5  | #NULL! | 0 | 0 | 1  | 0 | 1 |
| 2  | #NULL! | 0 | 0 | 99 | 0 | 0 |
| 4  | #NULL! | 1 | 0 | 0  | 0 | 0 |
| 1  | #NULL! | 0 | 0 | 0  | 0 | 0 |
| 1  | #NULL! | 0 | 0 | 0  | 1 | 0 |
| 1  | #NULL! | 0 | 0 | 0  | 0 | 0 |
| 1  | #NULL! | 0 | 0 | 0  | 0 | 0 |
| 1  | #NULL! | 1 | 0 | 1  | 0 | 1 |
| 1  | #NULL! | 0 | 0 | 0  | 0 | 0 |
| 1  | #NULL! | 0 | 0 | 0  | 1 | 1 |
| 1  | #NULL! | 0 | 0 | 0  | 1 | 1 |
| 1  | #NULL! | 0 | 0 | 0  | 1 | 0 |
| 2  | #NULL! | 1 | 0 | 1  | 0 | 1 |
| 1  | #NULL! | 0 | 0 | 0  | 0 | 0 |
| 1  | #NULL! | 1 | 1 | 1  | 0 | 0 |

|    |        |    |    |    |    |    |
|----|--------|----|----|----|----|----|
| 1  | #NULL! | 0  | 0  | 0  | 0  | 0  |
| 1  | #NULL! | 0  | 0  | 0  | 0  | 0  |
| 4  | #NULL! | 1  | 0  | 0  | 0  | 0  |
| 4  | #NULL! | 0  | 0  | 1  | 0  | 0  |
| 1  | #NULL! | 0  | 0  | 1  | 0  | 0  |
| 1  | #NULL! | 1  | 0  | 1  | 99 | 1  |
| 1  | #NULL! | 0  | 0  | 0  | 0  | 0  |
| 2  | #NULL! | 1  | 1  | 1  | 1  | 1  |
| 1  | #NULL! | 1  | 0  | 99 | 0  | 0  |
| 1  | #NULL! | 0  | 0  | 1  | 0  | 1  |
| 1  | #NULL! | 0  | 0  | 0  | 1  | 0  |
| 5  | #NULL! | 1  | 0  | 1  | 1  | 0  |
| 1  | #NULL! | 0  | 0  | 0  | 0  | 0  |
| 1  | #NULL! | 0  | 0  | 0  | 0  | 0  |
| 1  | #NULL! | 0  | 0  | 0  | 0  | 0  |
| 5  | #NULL! | 1  | 1  | 1  | 1  | 1  |
| 1  | #NULL! | 0  | 0  | 1  | 1  | 1  |
| 1  | #NULL! | 0  | 0  | 0  | 0  | 0  |
| 1  | #NULL! | 1  | 0  | 0  | 0  | 1  |
| 1  | #NULL! | 0  | 0  | 0  | 1  | 0  |
| 3  | #NULL! | 0  | 0  | 0  | 0  | 0  |
| 99 | #NULL! | 1  | 0  | 0  | 0  | 1  |
| 1  | #NULL! | 99 | 0  | 0  | 0  | 0  |
| 4  | #NULL! | 1  | 0  | 0  | 0  | 0  |
| 3  | #NULL! | 1  | 0  | 1  | 1  | 0  |
| 1  | #NULL! | 0  | 0  | 0  | 0  | 1  |
| 1  | #NULL! | 0  | 0  | 0  | 0  | 0  |
| 7  | #NULL! | 1  | 0  | 0  | 0  | 0  |
| 1  | #NULL! | 99 | 99 | 99 | 99 | 99 |
| 1  | #NULL! | 0  | 0  | 0  | 1  | 0  |
| 1  | #NULL! | 0  | 1  | 0  | 0  | 0  |
| 2  | #NULL! | 1  | 0  | 0  | 0  | 0  |
| 4  | #NULL! | 1  | 99 | 1  | 1  | 1  |
| 2  | #NULL! | 1  | 0  | 0  | 0  | 0  |
| 1  | #NULL! | 0  | 0  | 0  | 0  | 0  |
| 4  | #NULL! | 1  | 0  | 1  | 1  | 99 |
| 1  | #NULL! | 1  | 0  | 0  | 1  | 0  |
| 1  | #NULL! | 0  | 0  | 0  | 0  | 0  |
| 1  | #NULL! | 0  | 0  | 0  | 0  | 0  |
| 4  | #NULL! | 1  | 0  | 0  | 1  | 0  |
| 99 | #NULL! | 0  | 1  | 1  | 1  | 0  |
| 1  | #NULL! | 0  | 1  | 0  | 0  | 0  |
| 1  | #NULL! | 99 | 99 | 99 | 99 | 99 |
| 7  | #NULL! | 0  | 0  | 1  | 1  | 1  |
| 4  | #NULL! | 1  | 0  | 1  | 1  | 1  |
| 4  | #NULL! | 0  | 0  | 1  | 0  | 1  |
| 2  | #NULL! | 0  | 0  | 99 | 0  | 0  |

|   |        |   |   |   |    |    |
|---|--------|---|---|---|----|----|
| 1 | #NULL! | 0 | 0 | 0 | 0  | 0  |
| 1 | #NULL! | 0 | 0 | 0 | 99 | 0  |
| 1 | #NULL! | 0 | 0 | 0 | 0  | 0  |
| 1 | #NULL! | 0 | 0 | 0 | 0  | 0  |
| 1 | #NULL! | 1 | 0 | 0 | 0  | 0  |
| 1 | #NULL! | 0 | 0 | 0 | 1  | 1  |
| 4 | #NULL! | 1 | 0 | 1 | 0  | 0  |
| 1 | #NULL! | 0 | 0 | 1 | 0  | 0  |
| 1 | #NULL! | 1 | 1 | 0 | 1  | 1  |
| 1 | #NULL! | 0 | 0 | 0 | 0  | 0  |
| 2 | #NULL! | 1 | 0 | 1 | 1  | 1  |
| 1 | #NULL! | 0 | 0 | 1 | 0  | 1  |
| 2 | #NULL! | 1 | 0 | 1 | 0  | 0  |
| 1 | #NULL! | 0 | 1 | 1 | 0  | 0  |
| 1 | #NULL! | 0 | 0 | 1 | 1  | 0  |
| 4 | #NULL! | 1 | 0 | 1 | 0  | 1  |
| 1 | #NULL! | 0 | 0 | 0 | 0  | 0  |
| 4 | #NULL! | 1 | 0 | 1 | 0  | 0  |
| 2 | #NULL! | 1 | 1 | 1 | 0  | 1  |
| 1 | #NULL! | 0 | 1 | 1 | 0  | 1  |
| 1 | #NULL! | 0 | 0 | 0 | 0  | 0  |
| 1 | #NULL! | 1 | 1 | 1 | 1  | 1  |
| 1 | #NULL! | 0 | 0 | 1 | 0  | 1  |
| 2 | #NULL! | 0 | 0 | 1 | 0  | 0  |
| 1 | #NULL! | 0 | 0 | 1 | 0  | 1  |
| 2 | #NULL! | 1 | 0 | 0 | 0  | 0  |
| 6 | #NULL! | 1 | 1 | 1 | 1  | 1  |
| 2 | #NULL! | 1 | 0 | 0 | 1  | 1  |
| 2 | #NULL! | 1 | 0 | 0 | 0  | 0  |
| 1 | #NULL! | 0 | 1 | 1 | 1  | 1  |
| 1 | #NULL! | 0 | 0 | 0 | 0  | 0  |
| 2 | #NULL! | 0 | 0 | 1 | 0  | 1  |
| 1 | #NULL! | 0 | 0 | 0 | 0  | 0  |
| 4 | #NULL! | 0 | 0 | 0 | 0  | 0  |
| 4 | #NULL! | 1 | 0 | 0 | 1  | 1  |
| 1 | #NULL! | 0 | 0 | 0 | 0  | 0  |
| 4 | #NULL! | 1 | 1 | 1 | 0  | 1  |
| 1 | #NULL! | 0 | 0 | 0 | 0  | 0  |
| 1 | #NULL! | 0 | 0 | 0 | 0  | 0  |
| 4 | #NULL! | 1 | 0 | 1 | 0  | 1  |
| 1 | #NULL! | 0 | 0 | 0 | 0  | 1  |
| 1 | #NULL! | 0 | 0 | 0 | 0  | 99 |
| 3 | #NULL! | 0 | 1 | 0 | 0  | 0  |
| 4 | #NULL! | 1 | 0 | 1 | 0  | 0  |
| 1 | #NULL! | 0 | 0 | 0 | 0  | 0  |
| 1 | #NULL! | 0 | 0 | 0 | 0  | 0  |
| 1 | #NULL! | 0 | 0 | 0 | 0  | 0  |
| 1 | #NULL! | 0 | 0 | 0 | 1  | 1  |

|    |        |    |    |    |    |    |
|----|--------|----|----|----|----|----|
| 7  | #NULL! | 0  | 0  | 0  | 0  | 0  |
| 1  | #NULL! | 0  | 0  | 0  | 0  | 0  |
| 1  | #NULL! | 0  | 0  | 0  | 0  | 0  |
| 1  | #NULL! | 0  | 0  | 99 | 0  | 0  |
| 5  | #NULL! | 1  | 1  | 1  | 1  | 1  |
| 1  | #NULL! | 99 | 1  | 99 | 1  | 0  |
| 1  | #NULL! | 0  | 0  | 0  | 0  | 99 |
| 1  | #NULL! | 0  | 0  | 1  | 0  | 1  |
| 4  | #NULL! | 0  | 0  | 1  | 1  | 1  |
| 4  | #NULL! | 0  | 0  | 0  | 0  | 0  |
| 4  | #NULL! | 0  | 1  | 0  | 0  | 0  |
| 2  | #NULL! | 1  | 0  | 1  | 0  | 0  |
| 1  | #NULL! | 0  | 0  | 0  | 1  | 0  |
| 1  | #NULL! | 0  | 0  | 0  | 0  | 0  |
| 1  | #NULL! | 0  | 0  | 0  | 0  | 0  |
| 1  | #NULL! | 0  | 0  | 0  | 0  | 0  |
| 3  | #NULL! | 0  | 1  | 0  | 0  | 0  |
| 99 | #NULL! | 1  | 1  | 0  | 0  | 0  |
| 2  | #NULL! | 1  | 1  | 0  | 0  | 0  |
| 4  | #NULL! | 0  | 1  | 0  | 0  | 0  |
| 1  | #NULL! | 0  | 0  | 0  | 1  | 0  |
| 4  | #NULL! | 1  | 0  | 0  | 0  | 0  |
| 1  | #NULL! | 0  | 0  | 0  | 0  | 0  |
| 1  | #NULL! | 0  | 0  | 0  | 1  | 0  |
| 99 | #NULL! | 99 | 99 | 99 | 99 | 99 |
| 1  | #NULL! | 99 | 0  | 0  | 0  | 1  |
| 1  | #NULL! | 0  | 0  | 0  | 0  | 0  |
| 1  | #NULL! | 0  | 0  | 0  | 0  | 0  |
| 4  | #NULL! | 1  | 1  | 1  | 0  | 0  |
| 7  | #NULL! | 0  | 0  | 0  | 0  | 0  |
| 4  | #NULL! | 0  | 0  | 1  | 1  | 1  |
| 1  | #NULL! | 0  | 0  | 0  | 0  | 0  |
| 4  | #NULL! | 1  | 0  | 1  | 1  | 0  |
| 5  | #NULL! | 0  | 0  | 0  | 0  | 0  |
| 2  | #NULL! | 0  | 0  | 0  | 0  | 0  |
| 1  | #NULL! | 0  | 0  | 0  | 0  | 0  |
| 1  | #NULL! | 0  | 0  | 1  | 1  | 1  |
| 5  | #NULL! | 1  | 0  | 0  | 0  | 1  |
| 1  | #NULL! | 0  | 0  | 0  | 0  | 0  |
| 1  | #NULL! | 0  | 0  | 0  | 0  | 0  |
| 2  | #NULL! | 1  | 0  | 0  | 1  | 1  |
| 1  | #NULL! | 0  | 0  | 0  | 0  | 0  |
| 1  | #NULL! | 0  | 0  | 0  | 0  | 0  |
| 1  | #NULL! | 0  | 0  | 0  | 0  | 0  |
| 4  | #NULL! | 0  | 0  | 1  | 1  | 1  |
| 1  | #NULL! | 1  | 0  | 0  | 0  | 0  |
| 2  | #NULL! | 0  | 0  | 0  | 0  | 0  |
| 1  | #NULL! | 0  | 0  | 0  | 0  | 0  |

|   |        |    |    |    |    |    |
|---|--------|----|----|----|----|----|
| 1 | #NULL! | 0  | 0  | 0  | 0  | 0  |
| 1 | #NULL! | 0  | 0  | 0  | 1  | 1  |
| 1 | #NULL! | 0  | 0  | 0  | 0  | 0  |
| 2 | #NULL! | 0  | 0  | 1  | 0  | 1  |
| 4 | #NULL! | 1  | 0  | 1  | 1  | 1  |
| 1 | #NULL! | 0  | 0  | 0  | 0  | 0  |
| 4 | #NULL! | 1  | 0  | 0  | 0  | 0  |
| 5 | #NULL! | 0  | 0  | 0  | 0  | 0  |
| 1 | #NULL! | 1  | 0  | 0  | 0  | 0  |
| 1 | #NULL! | 0  | 0  | 0  | 0  | 0  |
| 1 | #NULL! | 0  | 0  | 1  | 0  | 1  |
| 1 | #NULL! | 0  | 0  | 0  | 0  | 0  |
| 4 | #NULL! | 1  | 0  | 1  | 0  | 1  |
| 1 | #NULL! | 0  | 0  | 1  | 0  | 0  |
| 2 | #NULL! | 1  | 0  | 0  | 0  | 1  |
| 2 | #NULL! | 1  | 0  | 0  | 0  | 0  |
| 1 | #NULL! | 0  | 0  | 0  | 0  | 0  |
| 1 | #NULL! | 0  | 0  | 0  | 0  | 0  |
| 1 | #NULL! | 0  | 0  | 0  | 0  | 0  |
| 2 | #NULL! | 0  | 0  | 1  | 0  | 0  |
| 1 | #NULL! | 0  | 0  | 0  | 0  | 0  |
| 1 | #NULL! | 0  | 0  | 0  | 0  | 0  |
| 2 | #NULL! | 0  | 0  | 1  | 0  | 0  |
| 1 | #NULL! | 0  | 0  | 0  | 0  | 0  |
| 1 | #NULL! | 0  | 0  | 0  | 0  | 0  |
| 3 | #NULL! | 0  | 0  | 0  | 0  | 1  |
| 3 | #NULL! | 1  | 0  | 1  | 0  | 0  |
| 4 | #NULL! | 1  | 0  | 1  | 1  | 1  |
| 1 | #NULL! | 0  | 0  | 0  | 0  | 0  |
| 1 | #NULL! | 0  | 0  | 0  | 0  | 0  |
| 4 | #NULL! | 1  | 0  | 1  | 0  | 0  |
| 1 | #NULL! | 0  | 0  | 1  | 0  | 1  |
| 1 | #NULL! | 0  | 0  | 0  | 0  | 0  |
| 2 | #NULL! | 1  | 0  | 1  | 1  | 1  |
| 1 | #NULL! | 0  | 0  | 0  | 0  | 0  |
| 4 | #NULL! | 1  | 0  | 1  | 1  | 1  |
| 5 | #NULL! | 0  | 0  | 1  | 0  | 1  |
| 1 | #NULL! | 0  | 0  | 0  | 0  | 0  |
| 4 | #NULL! | 1  | 1  | 0  | 1  | 1  |
| 1 | #NULL! | 0  | 0  | 0  | 0  | 0  |
| 1 | #NULL! | 0  | 0  | 0  | 0  | 0  |
| 7 | #NULL! | 99 | 99 | 99 | 99 | 99 |
| 4 | #NULL! | 0  | 1  | 1  | 0  | 0  |
| 1 | #NULL! | 0  | 0  | 0  | 0  | 0  |
| 4 | #NULL! | 1  | 1  | 1  | 0  | 1  |
| 1 | #NULL! | 1  | 0  | 1  | 0  | 0  |
| 1 | #NULL! | 0  | 0  | 0  | 0  | 0  |
| 1 | #NULL! | 0  | 0  | 1  | 0  | 0  |
| 1 | #NULL! | 0  | 0  | 0  | 0  | 0  |
| 2 | #NULL! | 1  | 0  | 0  | 0  | 0  |
| 1 | #NULL! | 0  | 0  | 0  | 0  | 0  |



|    |        |    |    |    |    |    |
|----|--------|----|----|----|----|----|
| 4  | #NULL! | 0  | 1  | 0  | 0  | 0  |
| 1  | #NULL! | 0  | 0  | 1  | 0  | 0  |
| 2  | #NULL! | 1  | 0  | 1  | 1  | 1  |
| 4  | #NULL! | 1  | 0  | 1  | 1  | 1  |
| 4  | #NULL! | 0  | 0  | 0  | 0  | 0  |
| 2  | #NULL! | 1  | 0  | 0  | 0  | 0  |
| 1  | #NULL! | 0  | 0  | 0  | 0  | 0  |
| 1  | #NULL! | 0  | 0  | 0  | 0  | 0  |
| 1  | #NULL! | 0  | 0  | 1  | 0  | 0  |
| 1  | #NULL! | 1  | 0  | 1  | 0  | 0  |
| 2  | #NULL! | 1  | 1  | 0  | 0  | 0  |
| 4  | #NULL! | 1  | 0  | 0  | 0  | 0  |
| 1  | #NULL! | 1  | 0  | 1  | 0  | 1  |
| 99 | #NULL! | 0  | 0  | 1  | 0  | 1  |
| 1  | #NULL! | 0  | 0  | 1  | 0  | 1  |
| 4  | #NULL! | 1  | 0  | 1  | 0  | 1  |
| 1  | #NULL! | 0  | 0  | 0  | 0  | 0  |
| 4  | #NULL! | 1  | 0  | 1  | 1  | 0  |
| 1  | #NULL! | 1  | 0  | 0  | 0  | 0  |
| 6  | #NULL! | 0  | 0  | 1  | 99 | 0  |
| 4  | #NULL! | 1  | 0  | 0  | 0  | 0  |
| 2  | #NULL! | 0  | 0  | 0  | 0  | 0  |
| 1  | #NULL! | 0  | 0  | 0  | 0  | 0  |
| 1  | #NULL! | 1  | 0  | 1  | 0  | 0  |
| 1  | #NULL! | 0  | 0  | 0  | 0  | 0  |
| 3  | #NULL! | 0  | 0  | 1  | 0  | 1  |
| 1  | #NULL! | 0  | 0  | 0  | 0  | 0  |
| 2  | #NULL! | 0  | 0  | 1  | 1  | 1  |
| 2  | #NULL! | 0  | 0  | 0  | 0  | 0  |
| 99 | #NULL! | 99 | 99 | 99 | 99 | 0  |
| 4  | #NULL! | 0  | 0  | 0  | 0  | 0  |
| 1  | #NULL! | 0  | 0  | 0  | 0  | 0  |
| 1  | #NULL! | 0  | 0  | 0  | 0  | 0  |
| 1  | #NULL! | 0  | 0  | 0  | 0  | 0  |
| 1  | #NULL! | 0  | 0  | 0  | 0  | 99 |
| 1  | #NULL! | 0  | 0  | 0  | 0  | 0  |
| 4  | #NULL! | 1  | 0  | 1  | 0  | 1  |
| 1  | #NULL! | 1  | 0  | 1  | 0  | 0  |
| 1  | #NULL! | 0  | 0  | 0  | 0  | 0  |
| 1  | #NULL! | 0  | 0  | 0  | 0  | 0  |
| 2  | #NULL! | 1  | 0  | 0  | 0  | 0  |
| 1  | #NULL! | 0  | 0  | 1  | 0  | 0  |
| 7  | #NULL! | 1  | 0  | 0  | 0  | 0  |
| 3  | #NULL! | 1  | 0  | 1  | 1  | 0  |
| 4  | #NULL! | 1  | 0  | 1  | 0  | 0  |
| 1  | #NULL! | 0  | 0  | 0  | 0  | 0  |
| 1  | #NULL! | 0  | 1  | 0  | 0  | 0  |

|   |        |   |    |    |    |    |
|---|--------|---|----|----|----|----|
| 1 | #NULL! | 0 | 0  | 0  | 0  | 0  |
| 1 | #NULL! | 0 | 0  | 0  | 0  | 0  |
| 1 | #NULL! | 0 | 0  | 0  | 0  | 0  |
| 1 | #NULL! | 0 | 0  | 0  | 0  | 0  |
| 1 | #NULL! | 0 | 0  | 1  | 0  | 0  |
| 1 | #NULL! | 0 | 0  | 0  | 0  | 0  |
| 1 | #NULL! | 0 | 0  | 0  | 0  | 0  |
| 2 | #NULL! | 0 | 1  | 0  | 1  | 0  |
| 2 | #NULL! | 1 | 0  | 0  | 0  | 0  |
| 1 | #NULL! | 0 | 0  | 0  | 0  | 0  |
| 1 | #NULL! | 0 | 0  | 0  | 0  | 0  |
| 1 | #NULL! | 0 | 0  | 0  | 0  | 0  |
| 2 | #NULL! | 1 | 0  | 0  | 1  | 0  |
| 2 | #NULL! | 0 | 99 | 99 | 1  | 0  |
| 2 | #NULL! | 1 | 0  | 0  | 1  | 0  |
| 1 | #NULL! | 0 | 0  | 1  | 0  | 0  |
| 3 | #NULL! | 0 | 0  | 99 | 0  | 1  |
| 3 | #NULL! | 1 | 0  | 1  | 0  | 0  |
| 2 | #NULL! | 0 | 0  | 1  | 1  | 1  |
| 5 | #NULL! | 1 | 1  | 1  | 1  | 1  |
| 4 | #NULL! | 1 | 0  | 1  | 1  | 0  |
| 2 | #NULL! | 0 | 0  | 0  | 0  | 0  |
| 5 | #NULL! | 0 | 0  | 0  | 0  | 0  |
| 1 | #NULL! | 0 | 0  | 0  | 0  | 0  |
| 4 | #NULL! | 0 | 1  | 1  | 0  | 1  |
| 1 | #NULL! | 0 | 0  | 0  | 0  | 0  |
| 4 | #NULL! | 0 | 0  | 1  | 0  | 0  |
| 1 | #NULL! | 0 | 0  | 0  | 0  | 0  |
| 4 | #NULL! | 1 | 1  | 0  | 1  | 1  |
| 7 | #NULL! | 1 | 0  | 0  | 0  | 0  |
| 1 | #NULL! | 0 | 0  | 99 | 99 | 99 |
| 4 | #NULL! | 0 | 0  | 0  | 0  | 0  |
| 1 | #NULL! | 0 | 0  | 0  | 0  | 0  |
| 1 | #NULL! | 0 | 0  | 1  | 0  | 0  |
| 1 | #NULL! | 0 | 0  | 0  | 0  | 0  |
| 5 | #NULL! | 0 | 0  | 1  | 0  | 0  |
| 1 | #NULL! | 0 | 1  | 0  | 0  | 0  |
| 4 | #NULL! | 0 | 0  | 1  | 0  | 0  |
| 1 | #NULL! | 0 | 0  | 0  | 0  | 0  |
| 4 | #NULL! | 1 | 1  | 1  | 1  | 0  |
| 7 | #NULL! | 1 | 1  | 1  | 1  | 1  |
| 1 | #NULL! | 0 | 0  | 0  | 0  | 0  |
| 5 | #NULL! | 0 | 0  | 1  | 0  | 1  |
| 1 | #NULL! | 0 | 0  | 0  | 0  | 0  |
| 1 | #NULL! | 0 | 0  | 1  | 0  | 1  |
| 1 | #NULL! | 0 | 0  | 0  | 0  | 0  |
| 1 | #NULL! | 0 | 0  | 0  | 0  | 0  |
| 4 | #NULL! | 1 | 0  | 1  | 99 | 1  |

|   |        |   |   |   |   |   |
|---|--------|---|---|---|---|---|
| 1 | #NULL! | 0 | 0 | 0 | 0 | 0 |
| 1 | #NULL! | 1 | 0 | 0 | 0 | 0 |
| 4 | #NULL! | 1 | 0 | 0 | 1 | 0 |
| 1 | #NULL! | 0 | 0 | 0 | 0 | 0 |
| 1 | #NULL! | 0 | 0 | 0 | 0 | 0 |
| 1 | #NULL! | 0 | 0 | 0 | 1 | 1 |
| 2 | #NULL! | 1 | 0 | 1 | 1 | 0 |
| 3 | #NULL! | 1 | 0 | 1 | 1 | 0 |
| 1 | #NULL! | 0 | 0 | 0 | 0 | 0 |
| 4 | #NULL! | 1 | 0 | 1 | 0 | 0 |
| 1 | #NULL! | 0 | 0 | 1 | 0 | 1 |
| 2 | #NULL! | 0 | 1 | 1 | 1 | 1 |
| 2 | #NULL! | 0 | 0 | 1 | 0 | 0 |
| 7 | #NULL! | 1 | 0 | 1 | 0 | 1 |
| 1 | #NULL! | 0 | 0 | 0 | 0 | 0 |
| 1 | #NULL! | 0 | 0 | 0 | 0 | 0 |
| 1 | #NULL! | 0 | 0 | 0 | 0 | 0 |
| 4 | #NULL! | 1 | 0 | 0 | 1 | 1 |
| 2 | #NULL! | 1 | 0 | 0 | 1 | 1 |
| 4 | #NULL! | 0 | 0 | 0 | 0 | 0 |
| 2 | #NULL! | 1 | 0 | 1 | 0 | 0 |
| 2 | #NULL! | 1 | 0 | 1 | 0 | 0 |
| 1 | #NULL! | 0 | 0 | 1 | 0 | 1 |
| 1 | #NULL! | 0 | 0 | 1 | 0 | 1 |
| 4 | #NULL! | 1 | 0 | 1 | 0 | 0 |
| 1 | #NULL! | 0 | 0 | 1 | 0 | 1 |
| 4 | #NULL! | 1 | 0 | 1 | 0 | 1 |
| 4 | #NULL! | 1 | 0 | 1 | 0 | 1 |
| 4 | #NULL! | 0 | 0 | 1 | 1 | 0 |
| 3 | #NULL! | 1 | 0 | 0 | 0 | 0 |
| 1 | #NULL! | 0 | 0 | 0 | 0 | 0 |
| 2 | #NULL! | 1 | 0 | 0 | 0 | 1 |
| 4 | #NULL! | 0 | 1 | 0 | 0 | 0 |
| 1 | #NULL! | 0 | 0 | 1 | 0 | 0 |
| 1 | #NULL! | 0 | 0 | 0 | 0 | 0 |
| 1 | #NULL! | 0 | 0 | 0 | 0 | 0 |
| 1 | #NULL! | 1 | 1 | 1 | 0 | 1 |
| 1 | #NULL! | 1 | 1 | 0 | 0 | 1 |
| 1 | #NULL! | 0 | 0 | 1 | 0 | 0 |
| 1 | #NULL! | 0 | 0 | 0 | 0 | 0 |
| 4 | #NULL! | 1 | 0 | 0 | 0 | 0 |
| 5 | #NULL! | 0 | 0 | 1 | 1 | 0 |
| 1 | #NULL! | 0 | 0 | 0 | 0 | 0 |
| 1 | #NULL! | 0 | 0 | 0 | 0 | 0 |
| 3 | #NULL! | 1 | 0 | 0 | 1 | 1 |
| 1 | #NULL! | 0 | 0 | 0 | 0 | 0 |
| 1 | #NULL! | 0 | 0 | 0 | 0 | 0 |

|    |        |   |   |    |    |    |
|----|--------|---|---|----|----|----|
| 1  | #NULL! | 0 | 0 | 1  | 0  | 0  |
| 1  | #NULL! | 0 | 0 | 0  | 0  | 0  |
| 4  | #NULL! | 1 | 0 | 0  | 1  | 1  |
| 1  | #NULL! | 0 | 0 | 1  | 1  | 0  |
| 1  | #NULL! | 0 | 0 | 1  | 0  | 0  |
| 4  | #NULL! | 1 | 1 | 1  | 0  | 0  |
| 7  | #NULL! | 0 | 0 | 1  | 1  | 1  |
| 2  | #NULL! | 1 | 0 | 1  | 1  | 1  |
| 1  | #NULL! | 0 | 0 | 0  | 0  | 0  |
| 1  | #NULL! | 0 | 0 | 0  | 0  | 0  |
| 1  | #NULL! | 0 | 0 | 0  | 0  | 0  |
| 4  | #NULL! | 1 | 0 | 1  | 0  | 1  |
| 5  | #NULL! | 0 | 0 | 1  | 0  | 0  |
| 7  | #NULL! | 1 | 0 | 1  | 1  | 1  |
| 4  | #NULL! | 1 | 0 | 1  | 0  | 1  |
| 4  | #NULL! | 1 | 0 | 0  | 0  | 0  |
| 1  | #NULL! | 0 | 0 | 1  | 0  | 1  |
| 1  | #NULL! | 0 | 0 | 0  | 0  | 99 |
| 4  | #NULL! | 1 | 0 | 0  | 0  | 1  |
| 1  | #NULL! | 0 | 0 | 0  | 0  | 0  |
| 4  | #NULL! | 0 | 0 | 0  | 1  | 0  |
| 1  | #NULL! | 0 | 0 | 0  | 0  | 0  |
| 1  | #NULL! | 1 | 0 | 1  | 0  | 1  |
| 1  | #NULL! | 1 | 0 | 1  | 0  | 1  |
| 1  | #NULL! | 0 | 0 | 0  | 0  | 0  |
| 1  | #NULL! | 1 | 0 | 1  | 0  | 1  |
| 1  | #NULL! | 0 | 0 | 0  | 0  | 0  |
| 1  | #NULL! | 0 | 0 | 0  | 0  | 1  |
| 1  | #NULL! | 0 | 0 | 0  | 0  | 0  |
| 99 | #NULL! | 0 | 0 | 1  | 1  | 1  |
| 7  | #NULL! | 1 | 0 | 1  | 0  | 0  |
| 1  | #NULL! | 0 | 0 | 99 | 1  | 0  |
| 4  | #NULL! | 1 | 1 | 1  | 99 | 99 |
| 1  | #NULL! | 0 | 0 | 0  | 0  | 0  |
| 1  | #NULL! | 0 | 0 | 1  | 1  | 1  |
| 1  | #NULL! | 0 | 0 | 0  | 0  | 0  |
| 4  | #NULL! | 0 | 0 | 0  | 0  | 0  |
| 1  | #NULL! | 0 | 0 | 0  | 0  | 0  |
| 1  | #NULL! | 0 | 0 | 0  | 0  | 0  |
| 1  | #NULL! | 0 | 0 | 1  | 0  | 1  |
| 2  | #NULL! | 1 | 0 | 1  | 0  | 1  |
| 4  | #NULL! | 1 | 0 | 0  | 0  | 0  |
| 2  | #NULL! | 1 | 0 | 1  | 0  | 0  |
| 1  | #NULL! | 0 | 0 | 0  | 0  | 0  |
| 7  | #NULL! | 0 | 0 | 0  | 0  | 1  |
| 1  | #NULL! | 0 | 0 | 0  | 0  | 0  |
| 1  | #NULL! | 0 | 0 | 0  | 0  | 0  |
| 1  | #NULL! | 0 | 0 | 1  | 1  | 1  |

|   |        |   |   |    |   |   |
|---|--------|---|---|----|---|---|
| 1 | #NULL! | 0 | 0 | 0  | 0 | 0 |
| 2 | #NULL! | 1 | 0 | 0  | 0 | 0 |
| 1 | #NULL! | 0 | 0 | 0  | 0 | 0 |
| 4 | #NULL! | 1 | 0 | 0  | 0 | 0 |
| 4 | #NULL! | 1 | 0 | 1  | 1 | 0 |
| 2 | #NULL! | 0 | 0 | 0  | 0 | 0 |
| 1 | #NULL! | 0 | 0 | 0  | 0 | 0 |
| 2 | #NULL! | 0 | 0 | 1  | 1 | 1 |
| 1 | #NULL! | 0 | 0 | 0  | 0 | 0 |
| 1 | #NULL! | 0 | 0 | 0  | 0 | 0 |
| 1 | #NULL! | 1 | 0 | 0  | 1 | 1 |
| 4 | #NULL! | 1 | 0 | 1  | 0 | 0 |
| 1 | #NULL! | 0 | 0 | 99 | 0 | 0 |
| 1 | #NULL! | 0 | 0 | 0  | 0 | 0 |
| 2 | #NULL! | 1 | 0 | 1  | 0 | 1 |
| 4 | #NULL! | 1 | 0 | 1  | 1 | 0 |
| 1 | #NULL! | 0 | 0 | 1  | 0 | 1 |
| 1 | #NULL! | 0 | 0 | 1  | 0 | 0 |
| 4 | #NULL! | 1 | 0 | 0  | 0 | 1 |
| 1 | #NULL! | 0 | 0 | 0  | 0 | 1 |
| 1 | #NULL! | 0 | 0 | 0  | 0 | 0 |
| 2 | #NULL! | 1 | 0 | 0  | 0 | 0 |
| 1 | #NULL! | 0 | 1 | 0  | 0 | 0 |
| 4 | #NULL! | 1 | 0 | 1  | 0 | 0 |
| 5 | #NULL! | 0 | 0 | 0  | 0 | 0 |
| 2 | #NULL! | 1 | 0 | 0  | 0 | 1 |
| 3 | #NULL! | 1 | 0 | 1  | 0 | 1 |
| 1 | #NULL! | 0 | 0 | 0  | 0 | 1 |
| 2 | #NULL! | 0 | 0 | 0  | 0 | 0 |
| 1 | #NULL! | 0 | 0 | 0  | 0 | 0 |
| 4 | #NULL! | 0 | 0 | 1  | 1 | 0 |
| 1 | #NULL! | 0 | 0 | 0  | 0 | 0 |
| 1 | #NULL! | 0 | 0 | 0  | 0 | 1 |
| 1 | #NULL! | 0 | 0 | 1  | 1 | 1 |
| 4 | #NULL! | 1 | 0 | 1  | 0 | 0 |
| 1 | #NULL! | 0 | 0 | 0  | 0 | 0 |
| 4 | #NULL! | 1 | 1 | 1  | 0 | 1 |
| 3 | #NULL! | 1 | 0 | 0  | 0 | 1 |
| 1 | #NULL! | 1 | 1 | 1  | 0 | 0 |
| 2 | #NULL! | 0 | 1 | 1  | 0 | 0 |
| 4 | #NULL! | 1 | 0 | 0  | 0 | 1 |
| 1 | #NULL! | 0 | 0 | 0  | 0 | 0 |
| 3 | #NULL! | 1 | 0 | 0  | 1 | 1 |
| 1 | #NULL! | 1 | 1 | 1  | 0 | 0 |
| 1 | #NULL! | 1 | 0 | 1  | 1 | 1 |
| 1 | #NULL! | 0 | 0 | 0  | 0 | 0 |
| 1 | #NULL! | 0 | 0 | 0  | 0 | 0 |
| 4 | #NULL! | 0 | 0 | 1  | 0 | 1 |

|   |        |   |   |    |    |   |
|---|--------|---|---|----|----|---|
| 2 | #NULL! | 0 | 0 | 0  | 0  | 0 |
| 1 | #NULL! | 0 | 0 | 0  | 0  | 0 |
| 2 | #NULL! | 1 | 0 | 1  | 0  | 0 |
| 1 | #NULL! | 0 | 0 | 0  | 1  | 0 |
| 1 | #NULL! | 0 | 0 | 0  | 0  | 0 |
| 1 | #NULL! | 0 | 1 | 0  | 0  | 1 |
| 1 | #NULL! | 0 | 0 | 0  | 0  | 0 |
| 5 | #NULL! | 0 | 0 | 0  | 0  | 0 |
| 1 | #NULL! | 0 | 0 | 0  | 0  | 0 |
| 1 | #NULL! | 0 | 0 | 0  | 0  | 0 |
| 1 | #NULL! | 0 | 0 | 0  | 0  | 0 |
| 5 | #NULL! | 0 | 0 | 1  | 0  | 1 |
| 1 | #NULL! | 1 | 0 | 1  | 1  | 1 |
| 1 | #NULL! | 0 | 1 | 0  | 0  | 0 |
| 1 | #NULL! | 0 | 0 | 0  | 0  | 0 |
| 1 | #NULL! | 0 | 0 | 0  | 1  | 0 |
| 4 | #NULL! | 0 | 1 | 1  | 0  | 1 |
| 1 | #NULL! | 0 | 0 | 0  | 0  | 1 |
| 1 | #NULL! | 0 | 1 | 0  | 0  | 1 |
| 1 | #NULL! | 0 | 0 | 1  | 0  | 1 |
| 1 | #NULL! | 0 | 1 | 0  | 0  | 0 |
| 4 | #NULL! | 0 | 0 | 1  | 0  | 1 |
| 4 | #NULL! | 1 | 0 | 0  | 0  | 1 |
| 1 | #NULL! | 0 | 0 | 1  | 0  | 0 |
| 4 | #NULL! | 1 | 0 | 0  | 1  | 1 |
| 1 | #NULL! | 0 | 0 | 0  | 0  | 0 |
| 1 | #NULL! | 0 | 0 | 0  | 0  | 0 |
| 4 | #NULL! | 1 | 0 | 0  | 0  | 0 |
| 2 | #NULL! | 0 | 0 | 1  | 1  | 0 |
| 1 | #NULL! | 0 | 0 | 0  | 0  | 0 |
| 2 | #NULL! | 0 | 0 | 0  | 0  | 0 |
| 1 | #NULL! | 0 | 0 | 1  | 1  | 0 |
| 1 | #NULL! | 0 | 0 | 0  | 99 | 0 |
| 4 | #NULL! | 0 | 0 | 1  | 0  | 1 |
| 4 | #NULL! | 1 | 0 | 1  | 0  | 1 |
| 1 | #NULL! | 0 | 0 | 0  | 0  | 0 |
| 1 | #NULL! | 0 | 0 | 1  | 0  | 0 |
| 1 | #NULL! | 0 | 1 | 0  | 0  | 0 |
| 4 | #NULL! | 1 | 0 | 1  | 0  | 0 |
| 1 | #NULL! | 0 | 0 | 0  | 1  | 0 |
| 1 | #NULL! | 0 | 0 | 99 | 0  | 0 |
| 4 | #NULL! | 0 | 0 | 0  | 0  | 0 |
| 2 | #NULL! | 0 | 0 | 1  | 1  | 1 |
| 1 | #NULL! | 0 | 0 | 0  | 0  | 0 |
| 4 | #NULL! | 1 | 0 | 1  | 0  | 1 |
| 1 | #NULL! | 0 | 0 | 1  | 0  | 0 |
| 6 | #NULL! | 0 | 0 | 1  | 1  | 1 |
| 1 | #NULL! | 0 | 0 | 1  | 0  | 0 |

|    |        |   |   |   |   |   |
|----|--------|---|---|---|---|---|
| 5  | #NULL! | 0 | 0 | 1 | 0 | 1 |
| 1  | #NULL! | 0 | 1 | 0 | 1 | 0 |
| 1  | #NULL! | 0 | 0 | 0 | 0 | 0 |
| 2  | #NULL! | 1 | 0 | 0 | 0 | 0 |
| 3  | #NULL! | 1 | 0 | 1 | 0 | 1 |
| 2  | #NULL! | 1 | 0 | 1 | 0 | 0 |
| 1  | #NULL! | 0 | 0 | 0 | 0 | 0 |
| 2  | #NULL! | 1 | 0 | 1 | 0 | 1 |
| 1  | #NULL! | 0 | 0 | 0 | 0 | 0 |
| 2  | #NULL! | 1 | 0 | 1 | 1 | 0 |
| 1  | #NULL! | 0 | 0 | 1 | 0 | 0 |
| 1  | #NULL! | 0 | 0 | 0 | 0 | 0 |
| 1  | #NULL! | 0 | 0 | 0 | 0 | 0 |
| 1  | #NULL! | 0 | 0 | 0 | 0 | 0 |
| 4  | #NULL! | 1 | 0 | 0 | 0 | 1 |
| 1  | #NULL! | 0 | 0 | 0 | 0 | 0 |
| 1  | #NULL! | 1 | 0 | 1 | 0 | 0 |
| 1  | #NULL! | 0 | 0 | 0 | 0 | 0 |
| 1  | #NULL! | 0 | 0 | 0 | 0 | 1 |
| 1  | #NULL! | 0 | 0 | 0 | 0 | 0 |
| 4  | #NULL! | 1 | 0 | 0 | 0 | 0 |
| 1  | #NULL! | 0 | 0 | 1 | 0 | 1 |
| 1  | #NULL! | 0 | 1 | 0 | 0 | 0 |
| 1  | #NULL! | 1 | 0 | 0 | 0 | 0 |
| 3  | #NULL! | 0 | 0 | 1 | 0 | 0 |
| 2  | #NULL! | 0 | 1 | 1 | 0 | 0 |
| 1  | #NULL! | 0 | 0 | 0 | 0 | 0 |
| 99 | #NULL! | 1 | 1 | 1 | 1 | 0 |
| 1  | #NULL! | 0 | 0 | 0 | 0 | 0 |
| 1  | #NULL! | 1 | 0 | 1 | 0 | 0 |
| 5  | #NULL! | 0 | 0 | 1 | 1 | 1 |
| 1  | #NULL! | 0 | 0 | 0 | 1 | 0 |
| 1  | #NULL! | 0 | 0 | 0 | 0 | 0 |
| 1  | #NULL! | 0 | 0 | 0 | 0 | 0 |
| 2  | #NULL! | 1 | 0 | 1 | 0 | 1 |
| 1  | #NULL! | 0 | 0 | 0 | 1 | 0 |
| 1  | #NULL! | 0 | 0 | 0 | 0 | 0 |
| 1  | #NULL! | 0 | 0 | 0 | 0 | 0 |
| 4  | #NULL! | 0 | 0 | 0 | 0 | 0 |
| 2  | #NULL! | 1 | 0 | 0 | 0 | 0 |
| 1  | #NULL! | 0 | 0 | 0 | 0 | 0 |
| 2  | #NULL! | 1 | 1 | 1 | 1 | 0 |
| 1  | #NULL! | 0 | 0 | 1 | 0 | 1 |
| 1  | #NULL! | 0 | 0 | 0 | 0 | 0 |
| 1  | #NULL! | 0 | 0 | 0 | 0 | 0 |
| 1  | #NULL! | 0 | 0 | 1 | 1 | 1 |
| 2  | #NULL! | 1 | 0 | 1 | 0 | 0 |
| 4  | #NULL! | 0 | 0 | 0 | 0 | 0 |

|    |        |    |    |    |    |    |
|----|--------|----|----|----|----|----|
| 7  | #NULL! | 1  | 0  | 1  | 0  | 1  |
| 1  | #NULL! | 0  | 0  | 0  | 0  | 0  |
| 1  | #NULL! | 0  | 0  | 0  | 0  | 0  |
| 1  | #NULL! | 1  | 0  | 1  | 0  | 1  |
| 99 | #NULL! | 99 | 99 | 99 | 99 | 99 |
| 1  | #NULL! | 1  | 0  | 0  | 1  | 0  |
| 2  | #NULL! | 1  | 0  | 1  | 0  | 0  |
| 1  | #NULL! | 0  | 0  | 0  | 0  | 0  |
| 7  | #NULL! | 1  | 0  | 0  | 0  | 0  |
| 1  | #NULL! | 0  | 0  | 0  | 0  | 0  |
| 7  | #NULL! | 1  | 0  | 0  | 1  | 0  |
| 1  | #NULL! | 0  | 0  | 0  | 0  | 0  |
| 2  | #NULL! | 1  | 0  | 1  | 0  | 1  |
| 1  | #NULL! | 0  | 1  | 0  | 0  | 0  |
| 1  | #NULL! | 0  | 0  | 1  | 0  | 1  |
| 1  | #NULL! | 1  | 0  | 1  | 0  | 0  |
| 2  | #NULL! | 1  | 0  | 0  | 0  | 0  |
| 1  | #NULL! | 1  | 0  | 0  | 1  | 0  |
| 1  | #NULL! | 0  | 0  | 0  | 1  | 0  |
| 4  | #NULL! | 1  | 1  | 0  | 0  | 0  |
| 1  | #NULL! | 0  | 1  | 1  | 0  | 0  |
| 1  | #NULL! | 0  | 0  | 0  | 0  | 0  |
| 1  | #NULL! | 0  | 0  | 0  | 0  | 0  |
| 7  | #NULL! | 1  | 1  | 1  | 0  | 1  |
| 4  | #NULL! | 1  | 0  | 0  | 0  | 0  |
| 1  | #NULL! | 0  | 0  | 0  | 0  | 0  |
| 1  | #NULL! | 0  | 0  | 0  | 0  | 0  |
| 1  | #NULL! | 0  | 0  | 0  | 0  | 0  |
| 5  | #NULL! | 0  | 0  | 1  | 0  | 1  |
| 2  | #NULL! | 0  | 0  | 1  | 0  | 0  |
| 1  | #NULL! | 0  | 0  | 0  | 0  | 1  |
| 2  | #NULL! | 1  | 0  | 1  | 1  | 1  |
| 1  | #NULL! | 0  | 0  | 1  | 0  | 0  |
| 5  | #NULL! | 1  | 0  | 1  | 0  | 0  |
| 1  | #NULL! | 0  | 0  | 0  | 1  | 0  |
| 99 | #NULL! | 1  | 0  | 1  | 0  | 1  |
| 4  | #NULL! | 1  | 0  | 0  | 1  | 1  |
| 2  | #NULL! | 0  | 1  | 1  | 0  | 99 |
| 1  | #NULL! | 0  | 0  | 0  | 0  | 0  |
| 1  | #NULL! | 0  | 0  | 0  | 1  | 1  |
| 4  | #NULL! | 1  | 0  | 1  | 0  | 0  |
| 1  | #NULL! | 0  | 0  | 0  | 0  | 0  |
| 4  | #NULL! | 1  | 0  | 0  | 0  | 0  |
| 5  | #NULL! | 0  | 0  | 0  | 0  | 0  |
| 2  | #NULL! | 1  | 0  | 0  | 0  | 0  |
| 4  | #NULL! | 1  | 99 | 99 | 99 | 1  |
| 1  | #NULL! | 0  | 0  | 0  | 0  | 0  |
| 1  | #NULL! | 0  | 0  | 1  | 0  | 0  |



|   |        |   |    |    |    |    |
|---|--------|---|----|----|----|----|
| 4 | #NULL! | 0 | 0  | 1  | 0  | 0  |
| 4 | #NULL! | 0 | 0  | 1  | 0  | 0  |
| 1 | #NULL! | 0 | 0  | 0  | 1  | 1  |
| 1 | #NULL! | 0 | 0  | 1  | 0  | 0  |
| 1 | #NULL! | 0 | 0  | 1  | 1  | 0  |
| 1 | #NULL! | 0 | 1  | 0  | 0  | 0  |
| 2 | #NULL! | 0 | 0  | 1  | 0  | 1  |
| 7 | #NULL! | 0 | 0  | 99 | 0  | 0  |
| 5 | #NULL! | 1 | 1  | 0  | 0  | 0  |
| 1 | #NULL! | 0 | 0  | 0  | 0  | 0  |
| 1 | #NULL! | 1 | 0  | 0  | 0  | 0  |
| 4 | #NULL! | 1 | 1  | 0  | 1  | 0  |
| 4 | #NULL! | 1 | 1  | 1  | 0  | 1  |
| 5 | #NULL! | 0 | 0  | 1  | 0  | 1  |
| 1 | #NULL! | 1 | 0  | 1  | 0  | 0  |
| 1 | #NULL! | 0 | 0  | 0  | 0  | 0  |
| 1 | #NULL! | 0 | 0  | 0  | 0  | 0  |
| 1 | #NULL! | 1 | 0  | 0  | 99 | 0  |
| 1 | #NULL! | 0 | 0  | 0  | 0  | 0  |
| 1 | #NULL! | 0 | 0  | 0  | 0  | 0  |
| 1 | #NULL! | 0 | 0  | 0  | 0  | 0  |
| 7 | #NULL! | 1 | 99 | 1  | 99 | 99 |
| 1 | #NULL! | 0 | 0  | 0  | 0  | 0  |
| 4 | #NULL! | 1 | 1  | 1  | 1  | 1  |
| 1 | #NULL! | 1 | 0  | 0  | 1  | 0  |
| 1 | #NULL! | 0 | 0  | 0  | 0  | 0  |
| 1 | #NULL! | 1 | 0  | 1  | 0  | 0  |
| 4 | #NULL! | 1 | 0  | 1  | 0  | 1  |
| 1 | #NULL! | 0 | 0  | 1  | 0  | 1  |
| 1 | #NULL! | 0 | 0  | 0  | 0  | 0  |
| 1 | #NULL! | 0 | 0  | 0  | 0  | 0  |
| 4 | #NULL! | 1 | 0  | 1  | 0  | 0  |
| 1 | #NULL! | 0 | 0  | 1  | 0  | 0  |
| 7 | #NULL! | 1 | 1  | 1  | 0  | 0  |
| 1 | #NULL! | 0 | 0  | 0  | 0  | 0  |
| 4 | #NULL! | 1 | 0  | 0  | 0  | 0  |
| 1 | #NULL! | 0 | 0  | 0  | 0  | 0  |
| 2 | #NULL! | 1 | 0  | 1  | 1  | 1  |
| 1 | #NULL! | 0 | 0  | 0  | 0  | 0  |
| 1 | #NULL! | 0 | 0  | 0  | 0  | 0  |
| 4 | #NULL! | 0 | 0  | 0  | 0  | 0  |
| 4 | #NULL! | 1 | 0  | 1  | 0  | 1  |
| 2 | #NULL! | 1 | 0  | 0  | 1  | 0  |
| 1 | #NULL! | 0 | 0  | 0  | 0  | 0  |
| 1 | #NULL! | 0 | 0  | 0  | 0  | 0  |
| 1 | #NULL! | 0 | 0  | 1  | 0  | 0  |
| 1 | #NULL! | 0 | 0  | 0  | 0  | 1  |
| 4 | #NULL! | 1 | 0  | 0  | 0  | 0  |

|    |        |   |   |    |   |    |
|----|--------|---|---|----|---|----|
| 1  | #NULL! | 0 | 0 | 0  | 0 | 0  |
| 7  | #NULL! | 0 | 0 | 0  | 0 | 0  |
| 1  | #NULL! | 0 | 0 | 0  | 0 | 0  |
| 7  | #NULL! | 0 | 1 | 1  | 1 | 99 |
| 1  | #NULL! | 0 | 0 | 0  | 0 | 0  |
| 1  | #NULL! | 1 | 0 | 0  | 0 | 0  |
| 1  | #NULL! | 0 | 0 | 0  | 0 | 0  |
| 99 | #NULL! | 0 | 0 | 0  | 0 | 0  |
| 1  | #NULL! | 0 | 0 | 0  | 0 | 0  |
| 1  | #NULL! | 0 | 0 | 1  | 1 | 0  |
| 2  | #NULL! | 1 | 0 | 99 | 1 | 0  |
| 1  | #NULL! | 0 | 0 | 0  | 0 | 1  |
| 1  | #NULL! | 0 | 0 | 0  | 0 | 0  |
| 3  | #NULL! | 1 | 1 | 1  | 1 | 1  |
| 5  | #NULL! | 1 | 1 | 1  | 0 | 0  |
| 2  | #NULL! | 0 | 0 | 0  | 1 | 0  |
| 1  | #NULL! | 0 | 0 | 0  | 0 | 0  |
| 4  | #NULL! | 1 | 0 | 0  | 0 | 0  |
| 99 | #NULL! | 0 | 0 | 0  | 1 | 1  |
| 2  | #NULL! | 1 | 0 | 0  | 0 | 0  |
| 1  | #NULL! | 0 | 0 | 0  | 0 | 0  |
| 1  | #NULL! | 0 | 0 | 1  | 0 | 1  |
| 2  | #NULL! | 0 | 0 | 0  | 0 | 0  |
| 5  | #NULL! | 0 | 0 | 1  | 0 | 1  |
| 2  | #NULL! | 1 | 0 | 1  | 1 | 1  |
| 4  | #NULL! | 1 | 0 | 1  | 1 | 1  |
| 1  | #NULL! | 0 | 0 | 0  | 0 | 0  |
| 4  | #NULL! | 1 | 0 | 0  | 0 | 0  |
| 2  | #NULL! | 1 | 0 | 1  | 0 | 0  |
| 1  | #NULL! | 0 | 0 | 0  | 0 | 1  |
| 5  | #NULL! | 1 | 0 | 0  | 0 | 1  |
| 1  | #NULL! | 0 | 0 | 0  | 0 | 0  |
| 1  | #NULL! | 0 | 1 | 0  | 1 | 0  |
| 1  | #NULL! | 0 | 0 | 0  | 0 | 0  |
| 1  | #NULL! | 0 | 0 | 0  | 1 | 0  |
| 2  | #NULL! | 0 | 0 | 1  | 0 | 0  |
| 4  | #NULL! | 1 | 0 | 1  | 0 | 1  |
| 4  | #NULL! | 0 | 0 | 0  | 0 | 0  |
| 1  | #NULL! | 0 | 0 | 0  | 0 | 1  |
| 4  | #NULL! | 0 | 0 | 1  | 0 | 0  |
| 1  | #NULL! | 0 | 0 | 0  | 0 | 0  |
| 1  | #NULL! | 0 | 0 | 0  | 0 | 0  |
| 4  | #NULL! | 1 | 0 | 0  | 0 | 0  |
| 1  | #NULL! | 1 | 0 | 1  | 0 | 0  |
| 2  | #NULL! | 0 | 0 | 99 | 0 | 0  |
| 2  | #NULL! | 0 | 0 | 0  | 0 | 0  |
| 4  | #NULL! | 0 | 0 | 0  | 1 | 0  |
| 1  | #NULL! | 0 | 0 | 1  | 0 | 0  |

|    |        |    |    |    |    |    |
|----|--------|----|----|----|----|----|
| 2  | #NULL! | 1  | 0  | 1  | 0  | 1  |
| 5  | #NULL! | 0  | 0  | 0  | 0  | 0  |
| 4  | #NULL! | 1  | 0  | 0  | 0  | 0  |
| 1  | #NULL! | 1  | 0  | 1  | 0  | 0  |
| 4  | #NULL! | 1  | 0  | 0  | 0  | 0  |
| 1  | #NULL! | 0  | 0  | 0  | 1  | 1  |
| 1  | #NULL! | 1  | 0  | 1  | 0  | 1  |
| 7  | #NULL! | 0  | 0  | 1  | 0  | 1  |
| 7  | #NULL! | 1  | 0  | 1  | 0  | 1  |
| 2  | #NULL! | 1  | 0  | 0  | 0  | 0  |
| 1  | #NULL! | 0  | 0  | 0  | 0  | 0  |
| 4  | #NULL! | 1  | 0  | 0  | 0  | 0  |
| 1  | #NULL! | 0  | 0  | 1  | 0  | 1  |
| 1  | #NULL! | 0  | 0  | 1  | 0  | 0  |
| 3  | #NULL! | 1  | 0  | 0  | 0  | 0  |
| 1  | #NULL! | 0  | 0  | 0  | 0  | 0  |
| 1  | #NULL! | 0  | 0  | 0  | 0  | 1  |
| 5  | #NULL! | 0  | 0  | 0  | 0  | 0  |
| 1  | #NULL! | 0  | 0  | 0  | 0  | 0  |
| 1  | #NULL! | 0  | 0  | 0  | 0  | 0  |
| 7  | #NULL! | 1  | 0  | 1  | 1  | 1  |
| 1  | #NULL! | 0  | 0  | 0  | 0  | 0  |
| 1  | #NULL! | 0  | 0  | 0  | 0  | 0  |
| 5  | #NULL! | 0  | 0  | 0  | 0  | 0  |
| 4  | #NULL! | 0  | 0  | 1  | 0  | 0  |
| 99 | #NULL! | 1  | 0  | 99 | 0  | 0  |
| 1  | #NULL! | 0  | 0  | 0  | 0  | 0  |
| 1  | #NULL! | 0  | 0  | 0  | 0  | 0  |
| 1  | #NULL! | 0  | 0  | 0  | 0  | 0  |
| 7  | #NULL! | 1  | 0  | 0  | 0  | 0  |
| 1  | #NULL! | 0  | 0  | 0  | 0  | 0  |
| 2  | #NULL! | 1  | 0  | 1  | 0  | 0  |
| 1  | #NULL! | 0  | 0  | 1  | 0  | 0  |
| 1  | #NULL! | 0  | 0  | 0  | 0  | 0  |
| 1  | #NULL! | 0  | 0  | 0  | 0  | 1  |
| 4  | #NULL! | 1  | 0  | 0  | 0  | 1  |
| 1  | #NULL! | 0  | 0  | 0  | 0  | 0  |
| 1  | #NULL! | 0  | 1  | 1  | 1  | 1  |
| 1  | #NULL! | 0  | 0  | 0  | 0  | 0  |
| 1  | #NULL! | 0  | 0  | 1  | 1  | 1  |
| 1  | #NULL! | 0  | 0  | 0  | 0  | 0  |
| 3  | #NULL! | 1  | 1  | 0  | 1  | 1  |
| 2  | #NULL! | 99 | 99 | 99 | 99 | 99 |
| 5  | #NULL! | 0  | 0  | 1  | 0  | 1  |
| 1  | #NULL! | 0  | 0  | 0  | 0  | 0  |
| 1  | #NULL! | 0  | 0  | 0  | 0  | 0  |
| 1  | #NULL! | 0  | 0  | 0  | 0  | 0  |
| 4  | #NULL! | 1  | 1  | 1  | 1  | 1  |

|    |        |   |   |    |   |   |
|----|--------|---|---|----|---|---|
| 1  | #NULL! | 0 | 0 | 1  | 0 | 1 |
| 1  | #NULL! | 0 | 0 | 0  | 0 | 1 |
| 1  | #NULL! | 0 | 1 | 1  | 0 | 0 |
| 1  | #NULL! | 1 | 0 | 0  | 1 | 1 |
| 4  | #NULL! | 1 | 0 | 1  | 1 | 0 |
| 1  | #NULL! | 0 | 0 | 0  | 0 | 1 |
| 2  | #NULL! | 0 | 1 | 0  | 0 | 0 |
| 4  | #NULL! | 1 | 0 | 1  | 0 | 0 |
| 1  | #NULL! | 0 | 0 | 0  | 0 | 0 |
| 3  | #NULL! | 0 | 1 | 0  | 0 | 1 |
| 7  | #NULL! | 0 | 0 | 0  | 1 | 0 |
| 1  | #NULL! | 0 | 0 | 1  | 0 | 1 |
| 4  | #NULL! | 1 | 0 | 1  | 1 | 1 |
| 3  | #NULL! | 1 | 0 | 1  | 0 | 1 |
| 1  | #NULL! | 0 | 0 | 0  | 0 | 0 |
| 1  | #NULL! | 0 | 0 | 0  | 0 | 0 |
| 5  | #NULL! | 1 | 1 | 1  | 0 | 1 |
| 4  | #NULL! | 0 | 0 | 0  | 0 | 0 |
| 7  | #NULL! | 1 | 0 | 1  | 1 | 1 |
| 5  | #NULL! | 1 | 0 | 1  | 0 | 1 |
| 2  | #NULL! | 0 | 0 | 0  | 0 | 0 |
| 7  | #NULL! | 1 | 0 | 1  | 1 | 1 |
| 1  | #NULL! | 0 | 0 | 0  | 0 | 1 |
| 1  | #NULL! | 0 | 0 | 0  | 0 | 0 |
| 7  | #NULL! | 1 | 0 | 1  | 1 | 1 |
| 1  | #NULL! | 0 | 0 | 0  | 0 | 0 |
| 1  | #NULL! | 0 | 0 | 0  | 0 | 0 |
| 1  | #NULL! | 0 | 0 | 99 | 0 | 1 |
| 99 | #NULL! | 1 | 0 | 1  | 1 | 0 |
| 1  | #NULL! | 0 | 0 | 0  | 0 | 0 |
| 1  | #NULL! | 0 | 0 | 0  | 0 | 0 |
| 1  | #NULL! | 0 | 0 | 0  | 0 | 0 |
| 5  | #NULL! | 0 | 0 | 0  | 0 | 0 |
| 1  | #NULL! | 0 | 0 | 1  | 0 | 1 |
| 2  | #NULL! | 1 | 0 | 1  | 1 | 1 |
| 1  | #NULL! | 0 | 0 | 0  | 0 | 0 |
| 7  | #NULL! | 1 | 0 | 0  | 1 | 1 |
| 1  | #NULL! | 0 | 0 | 0  | 0 | 0 |
| 4  | #NULL! | 1 | 1 | 1  | 0 | 1 |
| 3  | #NULL! | 1 | 1 | 0  | 0 | 0 |
| 1  | #NULL! | 0 | 0 | 0  | 0 | 0 |
| 1  | #NULL! | 0 | 0 | 0  | 0 | 0 |
| 2  | #NULL! | 1 | 0 | 0  | 0 | 0 |
| 4  | #NULL! | 1 | 0 | 1  | 1 | 1 |
| 2  | #NULL! | 1 | 0 | 1  | 0 | 0 |
| 4  | #NULL! | 1 | 0 | 1  | 0 | 1 |
| 1  | #NULL! | 0 | 0 | 1  | 0 | 0 |
| 1  | #NULL! | 0 | 0 | 0  | 0 | 0 |

|    |        |    |    |    |    |    |
|----|--------|----|----|----|----|----|
| 1  | #NULL! | 0  | 0  | 1  | 1  | 1  |
| 7  | #NULL! | 1  | 0  | 1  | 0  | 0  |
| 4  | #NULL! | 1  | 0  | 1  | 0  | 1  |
| 1  | #NULL! | 99 | 99 | 99 | 99 | 99 |
| 1  | #NULL! | 0  | 0  | 1  | 1  | 0  |
| 4  | #NULL! | 1  | 0  | 1  | 1  | 1  |
| 1  | #NULL! | 0  | 0  | 0  | 0  | 0  |
| 1  | #NULL! | 0  | 0  | 1  | 0  | 0  |
| 4  | #NULL! | 0  | 0  | 0  | 0  | 0  |
| 1  | #NULL! | 0  | 1  | 0  | 0  | 1  |
| 1  | #NULL! | 0  | 0  | 1  | 0  | 1  |
| 7  | #NULL! | 1  | 1  | 1  | 0  | 1  |
| 1  | #NULL! | 0  | 0  | 0  | 0  | 1  |
| 4  | #NULL! | 1  | 0  | 1  | 0  | 1  |
| 1  | #NULL! | 99 | 0  | 1  | 0  | 0  |
| 5  | #NULL! | 1  | 1  | 1  | 0  | 1  |
| 5  | #NULL! | 0  | 1  | 0  | 1  | 0  |
| 7  | #NULL! | 1  | 0  | 1  | 0  | 0  |
| 7  | #NULL! | 0  | 0  | 0  | 0  | 0  |
| 1  | #NULL! | 0  | 0  | 0  | 0  | 1  |
| 99 | #NULL! | 1  | 1  | 0  | 0  | 0  |
| 1  | #NULL! | 0  | 0  | 1  | 0  | 0  |
| 2  | #NULL! | 1  | 0  | 0  | 0  | 0  |
| 2  | #NULL! | 0  | 0  | 0  | 1  | 0  |
| 4  | #NULL! | 1  | 0  | 1  | 1  | 1  |
| 5  | #NULL! | 1  | 0  | 1  | 1  | 1  |
| 1  | #NULL! | 0  | 0  | 0  | 0  | 0  |
| 1  | #NULL! | 1  | 0  | 0  | 0  | 0  |
| 3  | #NULL! | 0  | 0  | 1  | 1  | 1  |
| 4  | #NULL! | 1  | 0  | 1  | 0  | 1  |
| 2  | #NULL! | 1  | 0  | 1  | 1  | 0  |
| 1  | #NULL! | 0  | 0  | 0  | 0  | 0  |
| 2  | #NULL! | 1  | 1  | 1  | 1  | 1  |
| 1  | #NULL! | 0  | 0  | 0  | 0  | 0  |
| 4  | #NULL! | 1  | 0  | 1  | 0  | 1  |
| 2  | #NULL! | 0  | 0  | 1  | 1  | 0  |
| 2  | #NULL! | 1  | 0  | 1  | 0  | 0  |
| 1  | #NULL! | 0  | 0  | 0  | 0  | 0  |
| 1  | #NULL! | 0  | 0  | 0  | 1  | 0  |
| 2  | #NULL! | 1  | 1  | 1  | 1  | 0  |
| 1  | #NULL! | 0  | 0  | 0  | 0  | 0  |
| 1  | #NULL! | 0  | 0  | 0  | 0  | 0  |
| 1  | #NULL! | 0  | 0  | 0  | 0  | 0  |
| 4  | #NULL! | 1  | 1  | 1  | 1  | 1  |
| 1  | #NULL! | 0  | 0  | 0  | 0  | 0  |
| 1  | #NULL! | 0  | 99 | 0  | 99 | 0  |
| 1  | #NULL! | 0  | 0  | 0  | 1  | 0  |
| 1  | #NULL! | 0  | 0  | 1  | 0  | 0  |

|   |        |    |    |   |   |   |
|---|--------|----|----|---|---|---|
| 4 | #NULL! | 1  | 0  | 1 | 1 | 1 |
| 7 | #NULL! | 1  | 0  | 1 | 1 | 1 |
| 2 | #NULL! | 1  | 0  | 0 | 0 | 0 |
| 1 | #NULL! | 1  | 0  | 0 | 0 | 0 |
| 5 | #NULL! | 0  | 0  | 1 | 0 | 1 |
| 2 | #NULL! | 1  | 0  | 0 | 0 | 0 |
| 1 | #NULL! | 0  | 0  | 1 | 0 | 0 |
| 2 | #NULL! | 1  | 0  | 1 | 0 | 1 |
| 7 | #NULL! | 1  | 1  | 1 | 1 | 1 |
| 2 | #NULL! | 0  | 0  | 0 | 0 | 0 |
| 1 | #NULL! | 0  | 0  | 1 | 1 | 1 |
| 4 | #NULL! | 0  | 0  | 0 | 0 | 0 |
| 1 | #NULL! | 0  | 0  | 1 | 0 | 0 |
| 1 | #NULL! | 0  | 0  | 0 | 0 | 0 |
| 1 | #NULL! | 0  | 0  | 0 | 0 | 0 |
| 2 | #NULL! | 1  | 0  | 1 | 0 | 0 |
| 4 | #NULL! | 1  | 0  | 1 | 0 | 0 |
| 1 | #NULL! | 0  | 0  | 0 | 0 | 0 |
| 2 | #NULL! | 1  | 0  | 1 | 1 | 1 |
| 2 | #NULL! | 1  | 0  | 0 | 1 | 1 |
| 7 | #NULL! | 0  | 0  | 0 | 1 | 1 |
| 4 | #NULL! | 1  | 0  | 1 | 0 | 1 |
| 1 | #NULL! | 1  | 0  | 0 | 0 | 1 |
| 2 | #NULL! | 0  | 0  | 0 | 0 | 0 |
| 2 | #NULL! | 1  | 0  | 1 | 0 | 0 |
| 1 | #NULL! | 1  | 0  | 0 | 0 | 0 |
| 4 | #NULL! | 0  | 1  | 0 | 0 | 0 |
| 2 | #NULL! | 1  | 0  | 1 | 0 | 0 |
| 1 | #NULL! | 0  | 0  | 0 | 0 | 0 |
| 1 | #NULL! | 0  | 0  | 0 | 0 | 0 |
| 1 | #NULL! | 0  | 0  | 0 | 0 | 0 |
| 1 | #NULL! | 1  | 0  | 1 | 0 | 1 |
| 4 | #NULL! | 99 | 0  | 1 | 0 | 0 |
| 2 | #NULL! | 1  | 0  | 0 | 0 | 0 |
| 2 | #NULL! | 1  | 0  | 1 | 1 | 0 |
| 4 | #NULL! | 1  | 0  | 0 | 0 | 1 |
| 1 | #NULL! | 0  | 0  | 0 | 0 | 0 |
| 5 | #NULL! | 1  | 1  | 0 | 1 | 1 |
| 1 | #NULL! | 0  | 0  | 0 | 0 | 0 |
| 1 | #NULL! | 0  | 1  | 0 | 1 | 1 |
| 2 | #NULL! | 1  | 0  | 1 | 1 | 1 |
| 2 | #NULL! | 0  | 0  | 1 | 1 | 0 |
| 1 | #NULL! | 0  | 0  | 0 | 0 | 0 |
| 2 | #NULL! | 0  | 0  | 0 | 0 | 0 |
| 1 | #NULL! | 0  | 99 | 0 | 0 | 0 |
| 1 | #NULL! | 0  | 0  | 0 | 0 | 0 |
| 5 | #NULL! | 0  | 0  | 1 | 1 | 1 |
| 2 | #NULL! | 1  | 0  | 1 | 0 | 1 |

|   |        |    |   |   |    |    |
|---|--------|----|---|---|----|----|
| 1 | #NULL! | 0  | 0 | 0 | 0  | 0  |
| 4 | #NULL! | 0  | 0 | 0 | 0  | 0  |
| 1 | #NULL! | 0  | 0 | 0 | 0  | 0  |
| 1 | #NULL! | 0  | 0 | 1 | 1  | 1  |
| 1 | #NULL! | 0  | 0 | 0 | 0  | 0  |
| 4 | #NULL! | 1  | 0 | 1 | 1  | 1  |
| 6 | #NULL! | 1  | 0 | 1 | 1  | 1  |
| 1 | #NULL! | 0  | 0 | 0 | 0  | 0  |
| 1 | #NULL! | 0  | 0 | 0 | 0  | 0  |
| 1 | #NULL! | 0  | 0 | 0 | 0  | 0  |
| 1 | #NULL! | 0  | 0 | 1 | 0  | 0  |
| 1 | #NULL! | 0  | 0 | 0 | 0  | 0  |
| 1 | #NULL! | 1  | 0 | 0 | 1  | 0  |
| 1 | #NULL! | 0  | 0 | 0 | 1  | 0  |
| 1 | #NULL! | 0  | 0 | 0 | 0  | 0  |
| 2 | #NULL! | 0  | 0 | 0 | 0  | 0  |
| 1 | #NULL! | 0  | 0 | 0 | 0  | 0  |
| 4 | #NULL! | 1  | 1 | 0 | 1  | 0  |
| 1 | #NULL! | 1  | 0 | 0 | 1  | 1  |
| 4 | #NULL! | 1  | 0 | 1 | 0  | 1  |
| 4 | #NULL! | 1  | 0 | 1 | 0  | 1  |
| 1 | #NULL! | 0  | 0 | 0 | 0  | 0  |
| 1 | #NULL! | 0  | 0 | 0 | 0  | 0  |
| 3 | #NULL! | 1  | 0 | 1 | 0  | 0  |
| 2 | #NULL! | 1  | 0 | 1 | 0  | 0  |
| 1 | #NULL! | 0  | 0 | 0 | 1  | 0  |
| 2 | #NULL! | 1  | 0 | 1 | 1  | 0  |
| 1 | #NULL! | 0  | 0 | 0 | 1  | 0  |
| 1 | #NULL! | 0  | 0 | 0 | 99 | 0  |
| 4 | #NULL! | 1  | 0 | 1 | 0  | 1  |
| 1 | #NULL! | 0  | 0 | 0 | 0  | 0  |
| 2 | #NULL! | 1  | 0 | 1 | 0  | 0  |
| 4 | #NULL! | 0  | 1 | 1 | 0  | 99 |
| 1 | #NULL! | 0  | 0 | 1 | 0  | 0  |
| 1 | #NULL! | 0  | 1 | 1 | 0  | 1  |
| 4 | #NULL! | 1  | 0 | 0 | 0  | 0  |
| 2 | #NULL! | 0  | 0 | 0 | 0  | 0  |
| 1 | #NULL! | 0  | 0 | 0 | 0  | 0  |
| 2 | #NULL! | 0  | 1 | 0 | 1  | 0  |
| 7 | #NULL! | 0  | 0 | 0 | 0  | 0  |
| 1 | #NULL! | 0  | 0 | 0 | 0  | 0  |
| 1 | #NULL! | 0  | 0 | 0 | 0  | 0  |
| 1 | #NULL! | 0  | 0 | 0 | 0  | 0  |
| 4 | #NULL! | 1  | 0 | 1 | 0  | 99 |
| 2 | #NULL! | 0  | 0 | 0 | 1  | 0  |
| 2 | #NULL! | 1  | 0 | 0 | 0  | 0  |
| 2 | #NULL! | 99 | 0 | 0 | 0  | 0  |
| 2 | #NULL! | 1  | 0 | 0 | 0  | 0  |

|   |        |    |    |    |    |    |
|---|--------|----|----|----|----|----|
| 1 | #NULL! | 0  | 0  | 0  | 0  | 0  |
| 1 | #NULL! | 0  | 0  | 0  | 0  | 0  |
| 1 | #NULL! | 0  | 0  | 0  | 0  | 0  |
| 2 | #NULL! | 0  | 0  | 0  | 0  | 0  |
| 1 | #NULL! | 0  | 0  | 0  | 0  | 0  |
| 4 | #NULL! | 1  | 0  | 0  | 0  | 0  |
| 1 | #NULL! | 99 | 99 | 99 | 99 | 99 |
| 4 | #NULL! | 1  | 0  | 1  | 0  | 0  |
| 1 | #NULL! | 0  | 0  | 0  | 0  | 0  |
| 1 | #NULL! | 1  | 0  | 0  | 0  | 1  |
| 1 | #NULL! | 0  | 0  | 0  | 0  | 0  |
| 1 | #NULL! | 1  | 0  | 0  | 0  | 0  |
| 5 | #NULL! | 1  | 0  | 0  | 0  | 0  |
| 7 | #NULL! | 99 | 0  | 1  | 0  | 0  |
| 1 | #NULL! | 0  | 0  | 0  | 0  | 0  |
| 1 | #NULL! | 0  | 0  | 0  | 0  | 0  |
| 1 | #NULL! | 0  | 0  | 1  | 0  | 0  |
| 4 | #NULL! | 99 | 99 | 99 | 99 | 99 |
| 2 | #NULL! | 0  | 0  | 0  | 0  | 0  |
| 3 | #NULL! | 1  | 1  | 0  | 0  | 0  |
| 1 | #NULL! | 0  | 0  | 0  | 0  | 0  |
| 1 | #NULL! | 0  | 1  | 0  | 0  | 0  |
| 2 | #NULL! | 1  | 0  | 1  | 0  | 0  |
| 1 | #NULL! | 0  | 0  | 0  | 0  | 0  |
| 1 | #NULL! | 0  | 0  | 0  | 0  | 0  |
| 5 | #NULL! | 0  | 0  | 1  | 99 | 1  |
| 1 | #NULL! | 0  | 0  | 0  | 0  | 0  |
| 1 | #NULL! | 0  | 0  | 0  | 0  | 0  |
| 4 | #NULL! | 1  | 99 | 1  | 99 | 99 |
| 1 | #NULL! | 99 | 0  | 0  | 99 | 0  |
| 4 | #NULL! | 0  | 0  | 0  | 0  | 0  |
| 1 | #NULL! | 0  | 0  | 1  | 0  | 1  |
| 4 | #NULL! | 1  | 1  | 1  | 0  | 1  |
| 7 | #NULL! | 0  | 1  | 0  | 0  | 1  |
| 4 | #NULL! | 1  | 0  | 0  | 0  | 0  |
| 1 | #NULL! | 0  | 0  | 0  | 0  | 0  |
| 1 | #NULL! | 0  | 0  | 0  | 0  | 0  |
| 1 | #NULL! | 0  | 0  | 0  | 0  | 0  |
| 6 | #NULL! | 1  | 1  | 1  | 1  | 1  |
| 1 | #NULL! | 0  | 0  | 0  | 0  | 0  |
| 1 | #NULL! | 0  | 0  | 0  | 0  | 0  |
| 1 | #NULL! | 0  | 0  | 0  | 0  | 0  |
| 1 | #NULL! | 0  | 0  | 0  | 0  | 0  |
| 4 | #NULL! | 1  | 0  | 1  | 0  | 0  |
| 1 | #NULL! | 0  | 0  | 0  | 0  | 1  |
| 2 | #NULL! | 0  | 0  | 1  | 0  | 0  |
| 1 | #NULL! | 0  | 0  | 0  | 1  | 0  |
| 7 | #NULL! | 0  | 0  | 1  | 0  | 1  |



|   |        |   |   |   |   |   |
|---|--------|---|---|---|---|---|
| 1 | #NULL! | 0 | 0 | 0 | 0 | 0 |
| 1 | #NULL! | 0 | 0 | 0 | 0 | 0 |
| 1 | #NULL! | 0 | 0 | 0 | 0 | 0 |
| 1 | #NULL! | 0 | 0 | 0 | 0 | 0 |
| 2 | #NULL! | 1 | 0 | 1 | 0 | 0 |
| 1 | #NULL! | 0 | 0 | 1 | 0 | 0 |
| 1 | #NULL! | 0 | 0 | 0 | 0 | 0 |
| 2 | #NULL! | 1 | 0 | 0 | 0 | 0 |
| 1 | #NULL! | 0 | 0 | 1 | 0 | 0 |
| 4 | #NULL! | 1 | 1 | 1 | 1 | 1 |
| 2 | #NULL! | 1 | 0 | 1 | 1 | 1 |
| 1 | #NULL! | 0 | 0 | 0 | 0 | 0 |
| 2 | #NULL! | 1 | 0 | 0 | 0 | 0 |
| 1 | #NULL! | 1 | 0 | 1 | 0 | 1 |
| 1 | #NULL! | 0 | 0 | 0 | 0 | 0 |
| 1 | #NULL! | 0 | 0 | 0 | 0 | 0 |
| 4 | #NULL! | 1 | 0 | 1 | 0 | 1 |
| 1 | #NULL! | 0 | 0 | 0 | 0 | 0 |
| 4 | #NULL! | 0 | 0 | 1 | 0 | 0 |
| 1 | #NULL! | 0 | 0 | 0 | 0 | 0 |
| 1 | #NULL! | 0 | 0 | 0 | 0 | 0 |
| 2 | #NULL! | 0 | 0 | 1 | 0 | 0 |
| 1 | #NULL! | 0 | 0 | 0 | 0 | 0 |
| 2 | #NULL! | 1 | 0 | 0 | 0 | 0 |
| 2 | #NULL! | 0 | 0 | 0 | 0 | 0 |
| 4 | #NULL! | 1 | 0 | 1 | 0 | 1 |
| 1 | #NULL! | 0 | 0 | 0 | 0 | 0 |
| 1 | #NULL! | 0 | 0 | 0 | 0 | 0 |
| 1 | #NULL! | 0 | 0 | 0 | 0 | 0 |
| 1 | #NULL! | 1 | 0 | 0 | 0 | 0 |
| 2 | #NULL! | 1 | 0 | 0 | 0 | 0 |
| 2 | #NULL! | 1 | 0 | 0 | 0 | 0 |
| 5 | #NULL! | 0 | 0 | 0 | 0 | 0 |
| 1 | #NULL! | 0 | 0 | 0 | 0 | 0 |
| 7 | #NULL! | 1 | 0 | 1 | 1 | 1 |
| 1 | #NULL! | 0 | 0 | 0 | 0 | 0 |
| 1 | #NULL! | 0 | 0 | 0 | 0 | 0 |
| 2 | #NULL! | 1 | 0 | 0 | 0 | 0 |
| 1 | #NULL! | 0 | 0 | 0 | 0 | 0 |
| 5 | #NULL! | 0 | 0 | 1 | 0 | 1 |
| 1 | #NULL! | 1 | 0 | 0 | 0 | 0 |
| 2 | #NULL! | 1 | 0 | 0 | 0 | 0 |
| 1 | #NULL! | 0 | 0 | 1 | 1 | 1 |
| 1 | #NULL! | 0 | 0 | 0 | 0 | 0 |
| 1 | #NULL! | 0 | 0 | 0 | 0 | 0 |
| 1 | #NULL! | 0 | 0 | 0 | 0 | 0 |
| 1 | #NULL! | 0 | 0 | 0 | 0 | 0 |
| 1 | #NULL! | 0 | 0 | 1 | 0 | 0 |

|    |        |    |    |    |    |    |
|----|--------|----|----|----|----|----|
| 1  | #NULL! | 0  | 0  | 0  | 0  | 0  |
| 1  | #NULL! | 0  | 0  | 0  | 0  | 0  |
| 1  | #NULL! | 0  | 0  | 99 | 0  | 1  |
| 4  | #NULL! | 0  | 0  | 0  | 0  | 0  |
| 2  | #NULL! | 0  | 1  | 0  | 0  | 0  |
| 1  | #NULL! | 0  | 0  | 0  | 0  | 0  |
| 2  | #NULL! | 1  | 0  | 1  | 0  | 0  |
| 1  | #NULL! | 0  | 0  | 0  | 0  | 0  |
| 1  | #NULL! | 0  | 0  | 0  | 0  | 0  |
| 1  | #NULL! | 1  | 0  | 0  | 1  | 0  |
| 1  | #NULL! | 0  | 0  | 0  | 0  | 0  |
| 2  | #NULL! | 0  | 0  | 0  | 0  | 0  |
| 2  | #NULL! | 1  | 0  | 0  | 0  | 0  |
| 2  | #NULL! | 1  | 0  | 0  | 1  | 1  |
| 1  | #NULL! | 0  | 0  | 0  | 0  | 0  |
| 2  | #NULL! | 0  | 1  | 1  | 0  | 0  |
| 5  | #NULL! | 1  | 1  | 1  | 1  | 1  |
| 1  | #NULL! | 0  | 0  | 0  | 0  | 0  |
| 1  | #NULL! | 0  | 1  | 1  | 1  | 0  |
| 2  | #NULL! | 0  | 0  | 1  | 0  | 0  |
| 1  | #NULL! | 0  | 0  | 0  | 0  | 0  |
| 1  | #NULL! | 0  | 0  | 1  | 0  | 1  |
| 1  | #NULL! | 0  | 0  | 1  | 0  | 0  |
| 1  | #NULL! | 0  | 0  | 0  | 0  | 0  |
| 2  | #NULL! | 1  | 0  | 99 | 0  | 0  |
| 4  | #NULL! | 0  | 0  | 0  | 0  | 0  |
| 1  | #NULL! | 0  | 0  | 0  | 0  | 0  |
| 1  | #NULL! | 0  | 0  | 0  | 0  | 0  |
| 5  | #NULL! | 0  | 0  | 1  | 0  | 1  |
| 1  | #NULL! | 0  | 0  | 0  | 0  | 0  |
| 2  | #NULL! | 1  | 0  | 1  | 0  | 0  |
| 1  | #NULL! | 0  | 0  | 0  | 0  | 0  |
| 1  | #NULL! | 1  | 1  | 1  | 0  | 0  |
| 1  | #NULL! | 0  | 0  | 0  | 0  | 0  |
| 4  | #NULL! | 1  | 0  | 0  | 0  | 0  |
| 2  | #NULL! | 0  | 0  | 0  | 1  | 0  |
| 1  | #NULL! | 0  | 1  | 0  | 0  | 0  |
| 1  | #NULL! | 0  | 0  | 0  | 0  | 0  |
| 5  | #NULL! | 1  | 0  | 0  | 0  | 0  |
| 1  | #NULL! | 0  | 0  | 0  | 0  | 0  |
| 2  | #NULL! | 1  | 0  | 1  | 1  | 1  |
| 1  | #NULL! | 0  | 0  | 99 | 0  | 1  |
| 1  | #NULL! | 0  | 0  | 0  | 1  | 0  |
| 2  | #NULL! | 1  | 0  | 0  | 0  | 0  |
| 4  | #NULL! | 0  | 1  | 0  | 0  | 0  |
| 1  | #NULL! | 0  | 0  | 0  | 0  | 0  |
| 1  | #NULL! | 0  | 0  | 1  | 0  | 1  |
| 99 | #NULL! | 99 | 99 | 99 | 99 | 99 |

|    |        |   |   |   |   |   |
|----|--------|---|---|---|---|---|
| 1  | #NULL! | 0 | 0 | 1 | 0 | 1 |
| 1  | #NULL! | 0 | 0 | 0 | 0 | 0 |
| 1  | #NULL! | 0 | 0 | 0 | 0 | 0 |
| 7  | #NULL! | 1 | 0 | 1 | 1 | 1 |
| 4  | #NULL! | 1 | 0 | 0 | 0 | 0 |
| 4  | #NULL! | 0 | 1 | 1 | 0 | 0 |
| 1  | #NULL! | 0 | 0 | 0 | 0 | 0 |
| 2  | #NULL! | 0 | 0 | 0 | 1 | 1 |
| 1  | #NULL! | 0 | 0 | 0 | 0 | 0 |
| 4  | #NULL! | 1 | 0 | 0 | 0 | 0 |
| 2  | #NULL! | 1 | 0 | 0 | 1 | 1 |
| 1  | #NULL! | 0 | 0 | 0 | 0 | 0 |
| 1  | #NULL! | 0 | 0 | 0 | 0 | 0 |
| 99 | #NULL! | 0 | 0 | 1 | 0 | 1 |
| 1  | #NULL! | 0 | 0 | 1 | 0 | 1 |
| 7  | #NULL! | 1 | 0 | 1 | 0 | 1 |
| 2  | #NULL! | 0 | 0 | 0 | 0 | 0 |
| 5  | #NULL! | 1 | 0 | 1 | 1 | 1 |
| 1  | #NULL! | 1 | 0 | 1 | 0 | 1 |
| 1  | #NULL! | 0 | 0 | 0 | 0 | 0 |
| 6  | #NULL! | 1 | 1 | 1 | 0 | 1 |
| 4  | #NULL! | 1 | 0 | 1 | 1 | 1 |
| 1  | #NULL! | 0 | 0 | 0 | 0 | 0 |
| 2  | #NULL! | 1 | 1 | 1 | 1 | 0 |
| 7  | #NULL! | 0 | 0 | 1 | 0 | 0 |
| 1  | #NULL! | 0 | 0 | 0 | 0 | 0 |
| 1  | #NULL! | 0 | 0 | 1 | 1 | 1 |
| 1  | #NULL! | 0 | 0 | 0 | 0 | 0 |
| 4  | #NULL! | 0 | 0 | 0 | 0 | 0 |
| 2  | #NULL! | 1 | 0 | 0 | 0 | 0 |
| 4  | #NULL! | 1 | 0 | 0 | 0 | 0 |
| 2  | #NULL! | 0 | 0 | 0 | 0 | 0 |
| 1  | #NULL! | 0 | 0 | 0 | 0 | 0 |
| 5  | #NULL! | 0 | 1 | 0 | 0 | 0 |
| 1  | #NULL! | 0 | 0 | 0 | 0 | 0 |
| 5  | #NULL! | 0 | 0 | 1 | 0 | 1 |
| 1  | #NULL! | 0 | 0 | 0 | 0 | 0 |
| 2  | #NULL! | 1 | 0 | 0 | 0 | 0 |
| 1  | #NULL! | 0 | 0 | 0 | 0 | 0 |
| 1  | #NULL! | 0 | 0 | 0 | 0 | 0 |
| 1  | #NULL! | 0 | 0 | 1 | 1 | 1 |
| 1  | #NULL! | 1 | 0 | 0 | 0 | 0 |
| 4  | #NULL! | 0 | 0 | 0 | 0 | 0 |
| 4  | #NULL! | 1 | 0 | 0 | 0 | 0 |
| 2  | #NULL! | 1 | 0 | 0 | 0 | 1 |
| 4  | #NULL! | 1 | 0 | 0 | 0 | 0 |
| 1  | #NULL! | 1 | 0 | 1 | 0 | 0 |
| 5  | #NULL! | 0 | 0 | 0 | 0 | 1 |

|   |        |   |    |    |    |    |
|---|--------|---|----|----|----|----|
| 1 | #NULL! | 0 | 0  | 0  | 0  | 0  |
| 4 | #NULL! | 1 | 0  | 1  | 0  | 0  |
| 4 | #NULL! | 1 | 0  | 0  | 0  | 0  |
| 1 | #NULL! | 0 | 0  | 0  | 0  | 0  |
| 1 | #NULL! | 0 | 0  | 0  | 0  | 1  |
| 4 | #NULL! | 1 | 0  | 0  | 0  | 0  |
| 2 | #NULL! | 1 | 0  | 0  | 0  | 1  |
| 1 | #NULL! | 0 | 0  | 0  | 0  | 0  |
| 5 | #NULL! | 1 | 99 | 1  | 1  | 0  |
| 2 | #NULL! | 1 | 0  | 0  | 0  | 1  |
| 4 | #NULL! | 1 | 0  | 0  | 0  | 0  |
| 1 | #NULL! | 0 | 0  | 0  | 0  | 0  |
| 1 | #NULL! | 0 | 0  | 0  | 0  | 0  |
| 4 | #NULL! | 1 | 0  | 0  | 0  | 0  |
| 1 | #NULL! | 0 | 0  | 0  | 0  | 0  |
| 1 | #NULL! | 1 | 0  | 0  | 0  | 1  |
| 1 | #NULL! | 0 | 0  | 0  | 0  | 0  |
| 3 | #NULL! | 1 | 0  | 0  | 0  | 0  |
| 4 | #NULL! | 0 | 0  | 1  | 0  | 1  |
| 1 | #NULL! | 1 | 0  | 0  | 0  | 0  |
| 1 | #NULL! | 1 | 0  | 99 | 99 | 0  |
| 2 | #NULL! | 1 | 0  | 0  | 0  | 1  |
| 4 | #NULL! | 1 | 0  | 99 | 0  | 0  |
| 7 | #NULL! | 0 | 0  | 1  | 0  | 1  |
| 4 | #NULL! | 1 | 0  | 1  | 0  | 0  |
| 1 | #NULL! | 0 | 0  | 0  | 0  | 0  |
| 1 | #NULL! | 0 | 0  | 1  | 1  | 1  |
| 1 | #NULL! | 0 | 0  | 1  | 1  | 1  |
| 1 | #NULL! | 0 | 0  | 0  | 0  | 1  |
| 3 | #NULL! | 1 | 0  | 1  | 0  | 99 |
| 2 | #NULL! | 1 | 1  | 0  | 0  | 0  |
| 4 | #NULL! | 1 | 0  | 99 | 1  | 1  |
| 1 | #NULL! | 1 | 0  | 0  | 0  | 0  |
| 1 | #NULL! | 0 | 0  | 0  | 0  | 0  |
| 4 | #NULL! | 0 | 0  | 0  | 0  | 0  |
| 1 | #NULL! | 0 | 0  | 1  | 1  | 1  |
| 1 | #NULL! | 0 | 0  | 0  | 1  | 0  |
| 1 | #NULL! | 0 | 0  | 0  | 0  | 0  |
| 1 | #NULL! | 0 | 0  | 0  | 0  | 0  |
| 2 | #NULL! | 1 | 0  | 1  | 0  | 0  |
| 2 | #NULL! | 1 | 0  | 0  | 0  | 0  |
| 4 | #NULL! | 0 | 0  | 0  | 0  | 0  |
| 1 | #NULL! | 0 | 0  | 0  | 0  | 0  |
| 1 | #NULL! | 0 | 0  | 0  | 0  | 0  |
| 1 | #NULL! | 0 | 0  | 0  | 0  | 0  |
| 1 | #NULL! | 0 | 0  | 1  | 0  | 0  |
| 1 | #NULL! | 0 | 0  | 0  | 1  | 0  |
| 1 | #NULL! | 0 | 0  | 0  | 0  | 1  |

|    |        |    |    |    |    |    |
|----|--------|----|----|----|----|----|
| 1  | #NULL! | 0  | 0  | 0  | 0  | 0  |
| 1  | #NULL! | 0  | 0  | 0  | 0  | 1  |
| 2  | #NULL! | 1  | 0  | 0  | 0  | 1  |
| 1  | #NULL! | 0  | 0  | 0  | 0  | 0  |
| 1  | #NULL! | 0  | 0  | 0  | 0  | 0  |
| 1  | #NULL! | 1  | 0  | 0  | 0  | 0  |
| 1  | #NULL! | 0  | 0  | 0  | 0  | 0  |
| 1  | #NULL! | 0  | 0  | 0  | 0  | 0  |
| 1  | #NULL! | 0  | 0  | 1  | 0  | 0  |
| 99 | #NULL! | 0  | 0  | 1  | 1  | 0  |
| 2  | #NULL! | 1  | 0  | 1  | 0  | 0  |
| 2  | #NULL! | 1  | 0  | 0  | 0  | 0  |
| 1  | #NULL! | 0  | 0  | 99 | 1  | 0  |
| 5  | #NULL! | 1  | 1  | 0  | 0  | 1  |
| 1  | #NULL! | 1  | 0  | 1  | 1  | 1  |
| 1  | #NULL! | 0  | 0  | 0  | 0  | 0  |
| 1  | #NULL! | 0  | 0  | 0  | 0  | 0  |
| 1  | #NULL! | 0  | 0  | 0  | 1  | 0  |
| 1  | #NULL! | 0  | 0  | 0  | 0  | 0  |
| 1  | #NULL! | 1  | 0  | 0  | 0  | 0  |
| 1  | #NULL! | 0  | 0  | 0  | 0  | 1  |
| 1  | #NULL! | 0  | 0  | 0  | 0  | 0  |
| 6  | #NULL! | 0  | 0  | 1  | 0  | 1  |
| 4  | #NULL! | 0  | 1  | 1  | 1  | 1  |
| 1  | #NULL! | 0  | 0  | 1  | 0  | 0  |
| 1  | #NULL! | 0  | 0  | 0  | 0  | 1  |
| 4  | #NULL! | 1  | 0  | 0  | 1  | 0  |
| 7  | #NULL! | 0  | 0  | 0  | 0  | 0  |
| 5  | #NULL! | 0  | 0  | 0  | 0  | 0  |
| 2  | #NULL! | 1  | 0  | 99 | 0  | 0  |
| 1  | #NULL! | 0  | 0  | 0  | 0  | 0  |
| 99 | #NULL! | 0  | 0  | 0  | 0  | 0  |
| 2  | #NULL! | 1  | 0  | 1  | 0  | 1  |
| 1  | #NULL! | 0  | 0  | 0  | 0  | 0  |
| 7  | #NULL! | 1  | 0  | 1  | 1  | 0  |
| 4  | #NULL! | 1  | 0  | 1  | 0  | 99 |
| 1  | #NULL! | 0  | 0  | 0  | 0  | 0  |
| 4  | #NULL! | 99 | 99 | 1  | 1  | 1  |
| 3  | #NULL! | 0  | 0  | 0  | 0  | 0  |
| 1  | #NULL! | 0  | 0  | 1  | 0  | 1  |
| 5  | #NULL! | 0  | 0  | 1  | 1  | 1  |
| 1  | #NULL! | 99 | 99 | 99 | 99 | 99 |
| 1  | #NULL! | 0  | 0  | 1  | 0  | 1  |
| 1  | #NULL! | 0  | 0  | 0  | 0  | 0  |
| 4  | #NULL! | 1  | 0  | 1  | 0  | 1  |
| 4  | #NULL! | 1  | 1  | 0  | 1  | 0  |
| 4  | #NULL! | 0  | 0  | 1  | 0  | 0  |
| 1  | #NULL! | 0  | 0  | 1  | 0  | 0  |

|    |        |    |    |    |    |    |
|----|--------|----|----|----|----|----|
| 1  | #NULL! | 0  | 0  | 0  | 0  | 1  |
| 1  | #NULL! | 0  | 0  | 0  | 0  | 0  |
| 4  | #NULL! | 1  | 0  | 0  | 0  | 0  |
| 1  | #NULL! | 0  | 0  | 0  | 0  | 0  |
| 1  | #NULL! | 0  | 0  | 1  | 0  | 0  |
| 3  | #NULL! | 1  | 0  | 0  | 0  | 0  |
| 4  | #NULL! | 1  | 0  | 1  | 0  | 1  |
| 1  | #NULL! | 0  | 0  | 1  | 0  | 0  |
| 5  | #NULL! | 1  | 0  | 0  | 0  | 0  |
| 1  | #NULL! | 0  | 0  | 0  | 0  | 0  |
| 7  | #NULL! | 1  | 99 | 99 | 99 | 99 |
| 4  | #NULL! | 1  | 0  | 1  | 0  | 0  |
| 7  | #NULL! | 0  | 0  | 1  | 0  | 0  |
| 2  | #NULL! | 0  | 0  | 0  | 0  | 0  |
| 3  | #NULL! | 1  | 0  | 1  | 0  | 0  |
| 1  | #NULL! | 0  | 0  | 0  | 0  | 0  |
| 2  | #NULL! | 1  | 0  | 0  | 0  | 0  |
| 1  | #NULL! | 0  | 0  | 0  | 0  | 0  |
| 1  | #NULL! | 0  | 0  | 0  | 0  | 0  |
| 1  | #NULL! | 1  | 0  | 0  | 1  | 1  |
| 5  | #NULL! | 1  | 1  | 1  | 1  | 1  |
| 4  | #NULL! | 1  | 0  | 0  | 0  | 0  |
| 1  | #NULL! | 0  | 0  | 0  | 0  | 0  |
| 1  | #NULL! | 0  | 0  | 0  | 0  | 0  |
| 1  | #NULL! | 0  | 0  | 0  | 0  | 1  |
| 1  | #NULL! | 0  | 0  | 1  | 1  | 0  |
| 1  | #NULL! | 99 | 99 | 99 | 99 | 99 |
| 3  | #NULL! | 1  | 1  | 0  | 0  | 0  |
| 1  | #NULL! | 0  | 0  | 0  | 0  | 0  |
| 4  | #NULL! | 0  | 0  | 0  | 0  | 0  |
| 1  | #NULL! | 0  | 0  | 1  | 0  | 0  |
| 1  | #NULL! | 0  | 0  | 0  | 0  | 0  |
| 2  | #NULL! | 1  | 0  | 0  | 0  | 0  |
| 7  | #NULL! | 1  | 0  | 1  | 0  | 0  |
| 5  | #NULL! | 1  | 1  | 1  | 0  | 1  |
| 1  | #NULL! | 0  | 0  | 0  | 0  | 1  |
| 5  | #NULL! | 0  | 1  | 1  | 0  | 0  |
| 1  | #NULL! | 0  | 0  | 0  | 0  | 0  |
| 4  | #NULL! | 1  | 0  | 0  | 0  | 0  |
| 1  | #NULL! | 0  | 0  | 0  | 0  | 0  |
| 2  | #NULL! | 1  | 1  | 1  | 99 | 0  |
| 1  | #NULL! | 0  | 0  | 0  | 0  | 0  |
| 2  | #NULL! | 1  | 0  | 0  | 0  | 0  |
| 4  | #NULL! | 1  | 1  | 99 | 99 | 0  |
| 1  | #NULL! | 0  | 0  | 0  | 0  | 0  |
| 1  | #NULL! | 1  | 1  | 1  | 1  | 1  |
| 5  | #NULL! | 0  | 0  | 0  | 0  | 0  |
| 99 | #NULL! | 1  | 1  | 99 | 1  | 1  |

|    |        |    |    |    |    |    |
|----|--------|----|----|----|----|----|
| 1  | #NULL! | 0  | 0  | 0  | 0  | 0  |
| 1  | #NULL! | 1  | 0  | 0  | 0  | 1  |
| 4  | #NULL! | 1  | 0  | 1  | 0  | 0  |
| 1  | #NULL! | 1  | 0  | 0  | 0  | 0  |
| 1  | #NULL! | 0  | 0  | 0  | 0  | 0  |
| 1  | #NULL! | 0  | 0  | 0  | 0  | 0  |
| 1  | #NULL! | 0  | 0  | 0  | 0  | 0  |
| 2  | #NULL! | 0  | 0  | 1  | 0  | 1  |
| 1  | #NULL! | 0  | 0  | 0  | 0  | 0  |
| 4  | #NULL! | 1  | 0  | 1  | 0  | 1  |
| 2  | #NULL! | 0  | 0  | 1  | 0  | 1  |
| 99 | #NULL! | 99 | 0  | 0  | 99 | 99 |
| 2  | #NULL! | 0  | 0  | 1  | 1  | 1  |
| 1  | #NULL! | 1  | 0  | 0  | 0  | 0  |
| 1  | #NULL! | 0  | 0  | 0  | 99 | 0  |
| 4  | #NULL! | 1  | 1  | 1  | 0  | 1  |
| 1  | #NULL! | 0  | 0  | 0  | 1  | 1  |
| 1  | #NULL! | 1  | 0  | 1  | 0  | 0  |
| 7  | #NULL! | 1  | 99 | 0  | 1  | 0  |
| 1  | #NULL! | 0  | 0  | 0  | 0  | 0  |
| 1  | #NULL! | 0  | 0  | 0  | 0  | 0  |
| 4  | #NULL! | 0  | 1  | 0  | 0  | 0  |
| 2  | #NULL! | 1  | 1  | 0  | 0  | 0  |
| 1  | #NULL! | 0  | 0  | 0  | 0  | 0  |
| 1  | #NULL! | 0  | 0  | 0  | 0  | 0  |
| 2  | #NULL! | 0  | 0  | 1  | 0  | 1  |
| 1  | #NULL! | 0  | 0  | 0  | 0  | 0  |
| 1  | #NULL! | 0  | 0  | 0  | 0  | 0  |
| 1  | #NULL! | 0  | 0  | 0  | 0  | 0  |
| 1  | #NULL! | 0  | 0  | 0  | 1  | 0  |
| 1  | #NULL! | 1  | 0  | 99 | 0  | 0  |
| 1  | #NULL! | 99 | 99 | 99 | 99 | 99 |
| 2  | #NULL! | 1  | 0  | 0  | 0  | 0  |
| 2  | #NULL! | 1  | 0  | 1  | 1  | 0  |
| 1  | #NULL! | 0  | 0  | 0  | 0  | 0  |
| 4  | #NULL! | 1  | 0  | 1  | 0  | 1  |
| 1  | #NULL! | 0  | 0  | 0  | 0  | 0  |
| 1  | #NULL! | 0  | 0  | 1  | 0  | 1  |
| 1  | #NULL! | 0  | 0  | 0  | 0  | 0  |
| 2  | #NULL! | 1  | 1  | 1  | 1  | 1  |
| 3  | #NULL! | 1  | 0  | 0  | 0  | 0  |
| 5  | #NULL! | 1  | 1  | 1  | 1  | 1  |
| 2  | #NULL! | 1  | 1  | 1  | 0  | 0  |
| 1  | #NULL! | 0  | 0  | 0  | 0  | 0  |
| 1  | #NULL! | 0  | 0  | 0  | 0  | 0  |
| 1  | #NULL! | 0  | 1  | 0  | 1  | 0  |
| 4  | #NULL! | 0  | 0  | 0  | 0  | 0  |
| 1  | #NULL! | 0  | 0  | 1  | 0  | 1  |

|   |        |    |    |    |    |   |
|---|--------|----|----|----|----|---|
| 1 | #NULL! | 0  | 0  | 0  | 0  | 0 |
| 4 | #NULL! | 1  | 1  | 1  | 1  | 0 |
| 2 | #NULL! | 1  | 0  | 0  | 0  | 0 |
| 4 | #NULL! | 0  | 0  | 1  | 0  | 1 |
| 2 | #NULL! | 1  | 0  | 0  | 0  | 0 |
| 4 | #NULL! | 1  | 0  | 1  | 0  | 0 |
| 1 | #NULL! | 0  | 0  | 1  | 0  | 0 |
| 1 | #NULL! | 1  | 0  | 0  | 0  | 0 |
| 5 | #NULL! | 1  | 0  | 1  | 0  | 0 |
| 1 | #NULL! | 1  | 0  | 1  | 1  | 1 |
| 4 | #NULL! | 1  | 0  | 1  | 1  | 0 |
| 1 | #NULL! | 0  | 0  | 0  | 0  | 0 |
| 7 | #NULL! | 1  | 0  | 1  | 0  | 1 |
| 1 | #NULL! | 0  | 0  | 0  | 0  | 1 |
| 1 | #NULL! | 0  | 0  | 1  | 0  | 0 |
| 1 | #NULL! | 0  | 0  | 1  | 1  | 1 |
| 4 | #NULL! | 1  | 1  | 1  | 1  | 1 |
| 2 | #NULL! | 1  | 1  | 1  | 1  | 1 |
| 4 | #NULL! | 0  | 0  | 1  | 1  | 0 |
| 2 | #NULL! | 1  | 0  | 0  | 0  | 0 |
| 1 | #NULL! | 0  | 0  | 0  | 0  | 0 |
| 2 | #NULL! | 1  | 0  | 1  | 0  | 1 |
| 1 | #NULL! | 0  | 0  | 0  | 0  | 0 |
| 1 | #NULL! | 0  | 0  | 0  | 0  | 0 |
| 1 | #NULL! | 99 | 99 | 99 | 99 | 1 |
| 1 | #NULL! | 0  | 0  | 0  | 0  | 1 |
| 2 | #NULL! | 1  | 0  | 0  | 0  | 0 |
| 4 | #NULL! | 1  | 0  | 0  | 0  | 0 |
| 1 | #NULL! | 0  | 0  | 0  | 0  | 0 |
| 4 | #NULL! | 1  | 0  | 1  | 1  | 1 |
| 1 | #NULL! | 0  | 0  | 0  | 1  | 0 |
| 1 | #NULL! | 0  | 0  | 0  | 0  | 0 |
| 2 | #NULL! | 0  | 0  | 1  | 0  | 1 |
| 7 | #NULL! | 0  | 0  | 1  | 0  | 0 |
| 1 | #NULL! | 0  | 0  | 0  | 0  | 0 |
| 2 | #NULL! | 1  | 0  | 0  | 0  | 0 |
| 5 | #NULL! | 1  | 1  | 1  | 0  | 1 |
| 1 | #NULL! | 0  | 0  | 0  | 0  | 0 |
| 1 | #NULL! | 1  | 0  | 99 | 0  | 0 |
| 1 | #NULL! | 0  | 0  | 0  | 0  | 0 |
| 1 | #NULL! | 0  | 0  | 1  | 1  | 0 |
| 1 | #NULL! | 0  | 0  | 0  | 0  | 0 |
| 2 | #NULL! | 0  | 0  | 1  | 0  | 0 |
| 2 | #NULL! | 1  | 0  | 0  | 0  | 0 |
| 1 | #NULL! | 0  | 0  | 0  | 0  | 0 |
| 1 | #NULL! | 1  | 0  | 0  | 0  | 0 |
| 1 | #NULL! | 0  | 0  | 0  | 0  | 0 |
| 1 | #NULL! | 0  | 0  | 0  | 0  | 0 |



|    |        |    |    |    |    |    |
|----|--------|----|----|----|----|----|
| 3  | #NULL! | 1  | 0  | 0  | 0  | 0  |
| 1  | #NULL! | 0  | 0  | 0  | 0  | 1  |
| 1  | #NULL! | 99 | 99 | 99 | 1  | 99 |
| 4  | #NULL! | 1  | 0  | 1  | 1  | 0  |
| 3  | #NULL! | 1  | 0  | 0  | 0  | 1  |
| 1  | #NULL! | 0  | 0  | 1  | 1  | 0  |
| 1  | #NULL! | 0  | 1  | 99 | 1  | 99 |
| 2  | #NULL! | 1  | 1  | 1  | 1  | 1  |
| 1  | #NULL! | 0  | 0  | 0  | 0  | 0  |
| 7  | #NULL! | 0  | 0  | 0  | 0  | 0  |
| 1  | #NULL! | 0  | 0  | 1  | 0  | 0  |
| 4  | #NULL! | 1  | 0  | 1  | 0  | 1  |
| 4  | #NULL! | 1  | 1  | 1  | 1  | 0  |
| 1  | #NULL! | 1  | 0  | 0  | 0  | 0  |
| 1  | #NULL! | 0  | 0  | 0  | 0  | 0  |
| 1  | #NULL! | 0  | 0  | 0  | 99 | 0  |
| 1  | #NULL! | 0  | 0  | 0  | 1  | 1  |
| 4  | #NULL! | 1  | 0  | 1  | 0  | 0  |
| 1  | #NULL! | 0  | 1  | 99 | 0  | 0  |
| 5  | #NULL! | 99 | 99 | 99 | 99 | 99 |
| 3  | #NULL! | 1  | 0  | 0  | 0  | 0  |
| 1  | #NULL! | 0  | 0  | 1  | 0  | 1  |
| 1  | #NULL! | 1  | 0  | 1  | 1  | 1  |
| 4  | #NULL! | 1  | 0  | 0  | 1  | 1  |
| 1  | #NULL! | 0  | 0  | 0  | 0  | 0  |
| 1  | #NULL! | 0  | 0  | 0  | 0  | 0  |
| 4  | #NULL! | 0  | 0  | 0  | 0  | 0  |
| 1  | #NULL! | 0  | 0  | 0  | 0  | 0  |
| 4  | #NULL! | 0  | 0  | 0  | 0  | 0  |
| 1  | #NULL! | 1  | 0  | 1  | 0  | 1  |
| 5  | #NULL! | 0  | 0  | 0  | 0  | 0  |
| 99 | #NULL! | 1  | 0  | 0  | 0  | 0  |
| 4  | #NULL! | 1  | 0  | 1  | 0  | 1  |
| 4  | #NULL! | 0  | 0  | 0  | 0  | 1  |
| 4  | #NULL! | 0  | 0  | 0  | 0  | 0  |
| 4  | #NULL! | 1  | 0  | 1  | 0  | 1  |
| 2  | #NULL! | 1  | 0  | 1  | 0  | 0  |
| 2  | #NULL! | 99 | 0  | 1  | 0  | 0  |
| 1  | #NULL! | 0  | 0  | 0  | 0  | 0  |
| 5  | #NULL! | 1  | 1  | 1  | 1  | 1  |
| 1  | #NULL! | 0  | 0  | 0  | 0  | 0  |
| 1  | #NULL! | 0  | 99 | 1  | 99 | 0  |
| 4  | #NULL! | 1  | 0  | 0  | 99 | 1  |
| 1  | #NULL! | 0  | 0  | 0  | 0  | 0  |
| 1  | #NULL! | 0  | 0  | 1  | 0  | 1  |
| 1  | #NULL! | 0  | 0  | 0  | 0  | 0  |
| 2  | #NULL! | 1  | 0  | 1  | 99 | 1  |
| 7  | #NULL! | 1  | 0  | 1  | 0  | 0  |

|   |        |   |   |    |   |    |
|---|--------|---|---|----|---|----|
| 1 | #NULL! | 0 | 0 | 0  | 0 | 0  |
| 1 | #NULL! | 0 | 0 | 0  | 0 | 0  |
| 4 | #NULL! | 0 | 0 | 0  | 0 | 0  |
| 2 | #NULL! | 1 | 1 | 0  | 0 | 1  |
| 1 | #NULL! | 0 | 0 | 0  | 0 | 0  |
| 1 | #NULL! | 0 | 0 | 1  | 0 | 1  |
| 1 | #NULL! | 0 | 0 | 1  | 0 | 1  |
| 1 | #NULL! | 0 | 1 | 0  | 0 | 0  |
| 1 | #NULL! | 0 | 0 | 1  | 0 | 99 |
| 2 | #NULL! | 1 | 0 | 0  | 0 | 1  |
| 2 | #NULL! | 1 | 0 | 0  | 0 | 1  |
| 1 | #NULL! | 0 | 0 | 0  | 0 | 0  |
| 3 | #NULL! | 1 | 0 | 1  | 0 | 0  |
| 4 | #NULL! | 1 | 0 | 1  | 0 | 0  |
| 1 | #NULL! | 0 | 0 | 0  | 0 | 0  |
| 1 | #NULL! | 1 | 0 | 1  | 1 | 1  |
| 1 | #NULL! | 0 | 0 | 0  | 0 | 0  |
| 1 | #NULL! | 0 | 0 | 0  | 1 | 0  |
| 1 | #NULL! | 0 | 0 | 0  | 0 | 0  |
| 4 | #NULL! | 0 | 0 | 0  | 0 | 0  |
| 1 | #NULL! | 0 | 0 | 0  | 0 | 0  |
| 1 | #NULL! | 0 | 0 | 0  | 0 | 0  |
| 1 | #NULL! | 0 | 0 | 0  | 0 | 0  |
| 1 | #NULL! | 0 | 0 | 1  | 0 | 99 |
| 1 | #NULL! | 0 | 0 | 0  | 0 | 0  |
| 1 | #NULL! | 0 | 0 | 1  | 0 | 1  |
| 3 | #NULL! | 1 | 0 | 0  | 0 | 0  |
| 2 | #NULL! | 1 | 0 | 0  | 0 | 0  |
| 2 | #NULL! | 0 | 0 | 0  | 0 | 0  |
| 1 | #NULL! | 0 | 0 | 0  | 0 | 0  |
| 1 | #NULL! | 0 | 0 | 0  | 0 | 0  |
| 1 | #NULL! | 0 | 0 | 0  | 0 | 0  |
| 5 | #NULL! | 0 | 0 | 1  | 0 | 1  |
| 1 | #NULL! | 0 | 0 | 0  | 0 | 0  |
| 5 | #NULL! | 1 | 0 | 1  | 0 | 1  |
| 4 | #NULL! | 1 | 0 | 1  | 0 | 1  |
| 1 | #NULL! | 0 | 0 | 0  | 0 | 0  |
| 3 | #NULL! | 1 | 0 | 0  | 0 | 0  |
| 1 | #NULL! | 0 | 0 | 0  | 0 | 1  |
| 1 | #NULL! | 0 | 0 | 0  | 0 | 0  |
| 1 | #NULL! | 1 | 1 | 0  | 1 | 0  |
| 7 | #NULL! | 1 | 1 | 1  | 1 | 1  |
| 4 | #NULL! | 1 | 0 | 0  | 0 | 0  |
| 1 | #NULL! | 1 | 0 | 0  | 0 | 1  |
| 1 | #NULL! | 0 | 0 | 0  | 1 | 0  |
| 2 | #NULL! | 1 | 0 | 0  | 0 | 0  |
| 1 | #NULL! | 0 | 0 | 99 | 0 | 0  |
| 1 | #NULL! | 0 | 0 | 0  | 0 | 0  |

|    |        |   |   |   |   |    |
|----|--------|---|---|---|---|----|
| 1  | #NULL! | 1 | 0 | 1 | 0 | 1  |
| 2  | #NULL! | 1 | 0 | 1 | 0 | 0  |
| 4  | #NULL! | 0 | 0 | 0 | 0 | 0  |
| 1  | #NULL! | 0 | 0 | 0 | 0 | 0  |
| 1  | #NULL! | 0 | 0 | 0 | 0 | 0  |
| 1  | #NULL! | 0 | 0 | 0 | 0 | 0  |
| 1  | #NULL! | 0 | 0 | 0 | 0 | 0  |
| 4  | #NULL! | 1 | 0 | 0 | 0 | 1  |
| 1  | #NULL! | 0 | 0 | 1 | 0 | 0  |
| 2  | #NULL! | 0 | 0 | 0 | 0 | 0  |
| 1  | #NULL! | 0 | 0 | 0 | 0 | 0  |
| 2  | #NULL! | 1 | 1 | 0 | 0 | 0  |
| 1  | #NULL! | 1 | 0 | 0 | 0 | 0  |
| 4  | #NULL! | 1 | 0 | 1 | 0 | 0  |
| 1  | #NULL! | 1 | 1 | 0 | 0 | 0  |
| 99 | #NULL! | 1 | 0 | 0 | 0 | 0  |
| 1  | #NULL! | 0 | 0 | 0 | 0 | 0  |
| 2  | #NULL! | 1 | 0 | 0 | 1 | 0  |
| 2  | #NULL! | 0 | 0 | 1 | 1 | 99 |
| 2  | #NULL! | 1 | 0 | 1 | 0 | 0  |
| 1  | #NULL! | 0 | 0 | 0 | 0 | 0  |
| 4  | #NULL! | 1 | 0 | 0 | 0 | 0  |
| 4  | #NULL! | 1 | 0 | 1 | 0 | 1  |
| 1  | #NULL! | 1 | 1 | 1 | 1 | 0  |
| 4  | #NULL! | 0 | 1 | 0 | 0 | 0  |
| 4  | #NULL! | 0 | 0 | 1 | 0 | 1  |
| 1  | #NULL! | 0 | 0 | 1 | 0 | 0  |
| 1  | #NULL! | 0 | 0 | 0 | 1 | 1  |
| 1  | #NULL! | 0 | 0 | 0 | 0 | 0  |
| 6  | #NULL! | 1 | 0 | 0 | 0 | 1  |
| 5  | #NULL! | 0 | 0 | 1 | 0 | 1  |
| 1  | #NULL! | 0 | 0 | 0 | 0 | 0  |
| 3  | #NULL! | 0 | 1 | 0 | 0 | 0  |
| 4  | #NULL! | 0 | 1 | 1 | 0 | 1  |
| 2  | #NULL! | 1 | 0 | 1 | 1 | 1  |
| 5  | #NULL! | 0 | 0 | 1 | 0 | 0  |
| 2  | #NULL! | 1 | 0 | 0 | 0 | 0  |
| 1  | #NULL! | 0 | 0 | 0 | 0 | 0  |
| 1  | #NULL! | 0 | 0 | 0 | 0 | 0  |
| 1  | #NULL! | 0 | 0 | 0 | 0 | 0  |
| 1  | #NULL! | 0 | 0 | 1 | 0 | 1  |
| 1  | #NULL! | 1 | 0 | 0 | 0 | 0  |
| 1  | #NULL! | 0 | 0 | 0 | 0 | 0  |
| 1  | #NULL! | 0 | 0 | 0 | 0 | 0  |
| 1  | #NULL! | 0 | 0 | 0 | 0 | 0  |
| 1  | #NULL! | 0 | 0 | 0 | 0 | 0  |
| 2  | #NULL! | 1 | 0 | 1 | 0 | 1  |
| 1  | #NULL! | 0 | 0 | 0 | 0 | 0  |
| 1  | #NULL! | 0 | 0 | 0 | 1 | 0  |

|   |        |    |    |    |    |    |
|---|--------|----|----|----|----|----|
| 1 | #NULL! | 1  | 0  | 0  | 1  | 0  |
| 1 | #NULL! | 0  | 0  | 0  | 0  | 0  |
| 2 | #NULL! | 0  | 0  | 0  | 1  | 1  |
| 7 | #NULL! | 1  | 0  | 0  | 0  | 0  |
| 1 | #NULL! | 0  | 0  | 0  | 0  | 0  |
| 4 | #NULL! | 1  | 0  | 0  | 1  | 0  |
| 1 | #NULL! | 0  | 0  | 0  | 0  | 0  |
| 4 | #NULL! | 0  | 0  | 0  | 1  | 0  |
| 3 | #NULL! | 1  | 0  | 1  | 0  | 0  |
| 1 | #NULL! | 0  | 0  | 0  | 0  | 0  |
| 4 | #NULL! | 1  | 0  | 1  | 0  | 0  |
| 1 | #NULL! | 0  | 0  | 0  | 0  | 0  |
| 2 | #NULL! | 0  | 0  | 0  | 0  | 0  |
| 1 | #NULL! | 0  | 0  | 0  | 0  | 0  |
| 2 | #NULL! | 1  | 0  | 0  | 1  | 0  |
| 2 | #NULL! | 1  | 0  | 0  | 0  | 0  |
| 5 | #NULL! | 0  | 0  | 0  | 0  | 0  |
| 1 | #NULL! | 0  | 0  | 0  | 0  | 0  |
| 1 | #NULL! | 0  | 1  | 0  | 0  | 0  |
| 1 | #NULL! | 0  | 0  | 0  | 0  | 0  |
| 1 | #NULL! | 0  | 0  | 0  | 0  | 0  |
| 4 | #NULL! | 0  | 0  | 0  | 0  | 1  |
| 1 | #NULL! | 0  | 0  | 0  | 0  | 0  |
| 2 | #NULL! | 0  | 1  | 0  | 0  | 0  |
| 6 | #NULL! | 0  | 1  | 1  | 0  | 1  |
| 4 | #NULL! | 0  | 0  | 1  | 0  | 0  |
| 4 | #NULL! | 1  | 0  | 1  | 0  | 1  |
| 1 | #NULL! | 0  | 0  | 0  | 0  | 0  |
| 1 | #NULL! | 0  | 0  | 1  | 0  | 0  |
| 2 | #NULL! | 1  | 0  | 0  | 1  | 1  |
| 1 | #NULL! | 0  | 0  | 0  | 0  | 0  |
| 1 | #NULL! | 1  | 0  | 0  | 0  | 0  |
| 4 | #NULL! | 1  | 0  | 0  | 0  | 0  |
| 1 | #NULL! | 0  | 0  | 0  | 0  | 1  |
| 1 | #NULL! | 1  | 0  | 0  | 0  | 0  |
| 4 | #NULL! | 1  | 0  | 0  | 0  | 0  |
| 2 | #NULL! | 0  | 0  | 0  | 0  | 0  |
| 1 | #NULL! | 0  | 0  | 0  | 0  | 0  |
| 1 | #NULL! | 0  | 0  | 0  | 0  | 0  |
| 1 | #NULL! | 1  | 0  | 0  | 0  | 0  |
| 1 | #NULL! | 0  | 0  | 0  | 0  | 0  |
| 1 | #NULL! | 99 | 99 | 99 | 99 | 99 |
| 4 | #NULL! | 0  | 1  | 0  | 0  | 0  |
| 7 | #NULL! | 1  | 0  | 0  | 0  | 0  |
| 2 | #NULL! | 0  | 0  | 0  | 0  | 0  |
| 1 | #NULL! | 0  | 0  | 0  | 0  | 0  |
| 1 | #NULL! | 0  | 0  | 1  | 0  | 0  |
| 2 | #NULL! | 0  | 0  | 1  | 0  | 0  |

|    |        |   |   |    |    |   |
|----|--------|---|---|----|----|---|
| 1  | #NULL! | 0 | 0 | 0  | 0  | 0 |
| 1  | #NULL! | 1 | 0 | 1  | 1  | 1 |
| 1  | #NULL! | 0 | 0 | 1  | 0  | 1 |
| 1  | #NULL! | 0 | 0 | 0  | 0  | 1 |
| 1  | #NULL! | 1 | 0 | 0  | 0  | 0 |
| 1  | #NULL! | 0 | 0 | 99 | 0  | 0 |
| 2  | #NULL! | 1 | 0 | 1  | 0  | 1 |
| 1  | #NULL! | 0 | 0 | 0  | 0  | 0 |
| 1  | #NULL! | 0 | 1 | 1  | 0  | 1 |
| 2  | #NULL! | 1 | 1 | 1  | 0  | 0 |
| 1  | #NULL! | 0 | 0 | 0  | 0  | 0 |
| 1  | #NULL! | 0 | 0 | 0  | 0  | 0 |
| 1  | #NULL! | 1 | 0 | 1  | 1  | 0 |
| 1  | #NULL! | 1 | 0 | 99 | 0  | 0 |
| 1  | #NULL! | 0 | 0 | 0  | 0  | 0 |
| 2  | #NULL! | 1 | 0 | 1  | 0  | 1 |
| 2  | #NULL! | 1 | 1 | 0  | 1  | 1 |
| 4  | #NULL! | 1 | 0 | 1  | 0  | 0 |
| 4  | #NULL! | 0 | 0 | 0  | 0  | 0 |
| 4  | #NULL! | 0 | 0 | 1  | 99 | 0 |
| 1  | #NULL! | 0 | 0 | 0  | 0  | 0 |
| 2  | #NULL! | 1 | 0 | 0  | 1  | 0 |
| 99 | #NULL! | 1 | 0 | 0  | 0  | 0 |
| 4  | #NULL! | 0 | 0 | 1  | 0  | 0 |
| 4  | #NULL! | 1 | 0 | 0  | 0  | 0 |
| 1  | #NULL! | 0 | 0 | 0  | 0  | 0 |
| 1  | #NULL! | 0 | 0 | 0  | 0  | 1 |
| 1  | #NULL! | 0 | 0 | 0  | 0  | 0 |
| 1  | #NULL! | 0 | 0 | 1  | 1  | 0 |
| 1  | #NULL! | 0 | 0 | 0  | 0  | 0 |
| 1  | #NULL! | 0 | 0 | 0  | 0  | 0 |
| 2  | #NULL! | 0 | 0 | 0  | 0  | 0 |
| 1  | #NULL! | 0 | 0 | 0  | 0  | 0 |
| 1  | #NULL! | 0 | 0 | 0  | 0  | 0 |
| 1  | #NULL! | 0 | 0 | 0  | 0  | 0 |
| 1  | #NULL! | 0 | 0 | 0  | 0  | 0 |
| 2  | #NULL! | 1 | 0 | 0  | 0  | 0 |
| 2  | #NULL! | 1 | 0 | 0  | 0  | 0 |
| 1  | #NULL! | 0 | 0 | 0  | 0  | 0 |
| 1  | #NULL! | 0 | 0 | 0  | 0  | 0 |
| 1  | #NULL! | 0 | 0 | 0  | 0  | 0 |
| 2  | #NULL! | 1 | 0 | 0  | 0  | 0 |
| 7  | #NULL! | 0 | 1 | 1  | 0  | 0 |
| 1  | #NULL! | 0 | 0 | 0  | 0  | 0 |
| 1  | #NULL! | 1 | 0 | 0  | 0  | 0 |
| 1  | #NULL! | 1 | 0 | 0  | 0  | 0 |
| 2  | #NULL! | 1 | 1 | 1  | 0  | 0 |
| 1  | #NULL! | 0 | 0 | 0  | 0  | 0 |

|    |        |    |   |    |    |   |
|----|--------|----|---|----|----|---|
| 2  | #NULL! | 1  | 0 | 0  | 0  | 1 |
| 1  | #NULL! | 0  | 0 | 0  | 1  | 0 |
| 1  | #NULL! | 0  | 0 | 0  | 0  | 0 |
| 2  | #NULL! | 0  | 0 | 0  | 0  | 0 |
| 1  | #NULL! | 0  | 0 | 0  | 0  | 0 |
| 2  | #NULL! | 0  | 0 | 0  | 0  | 0 |
| 1  | #NULL! | 0  | 0 | 1  | 1  | 0 |
| 1  | #NULL! | 0  | 0 | 0  | 0  | 0 |
| 4  | #NULL! | 1  | 0 | 0  | 0  | 0 |
| 1  | #NULL! | 0  | 0 | 0  | 0  | 0 |
| 2  | #NULL! | 0  | 0 | 0  | 0  | 0 |
| 1  | #NULL! | 0  | 0 | 1  | 0  | 0 |
| 3  | #NULL! | 1  | 0 | 0  | 0  | 0 |
| 1  | #NULL! | 0  | 0 | 0  | 0  | 0 |
| 1  | #NULL! | 0  | 0 | 0  | 0  | 0 |
| 2  | #NULL! | 1  | 0 | 1  | 1  | 0 |
| 4  | #NULL! | 1  | 0 | 0  | 0  | 0 |
| 4  | #NULL! | 1  | 0 | 0  | 0  | 0 |
| 2  | #NULL! | 1  | 1 | 0  | 1  | 1 |
| 1  | #NULL! | 1  | 0 | 0  | 1  | 1 |
| 1  | #NULL! | 0  | 0 | 0  | 0  | 0 |
| 1  | #NULL! | 0  | 0 | 0  | 0  | 0 |
| 1  | #NULL! | 0  | 0 | 0  | 0  | 0 |
| 1  | #NULL! | 0  | 0 | 0  | 0  | 0 |
| 2  | #NULL! | 0  | 1 | 0  | 0  | 0 |
| 2  | #NULL! | 0  | 1 | 0  | 0  | 0 |
| 1  | #NULL! | 0  | 0 | 1  | 0  | 0 |
| 1  | #NULL! | 0  | 0 | 0  | 0  | 0 |
| 4  | #NULL! | 1  | 0 | 0  | 1  | 1 |
| 1  | #NULL! | 0  | 0 | 1  | 99 | 0 |
| 1  | #NULL! | 1  | 0 | 0  | 1  | 1 |
| 4  | #NULL! | 1  | 1 | 1  | 1  | 1 |
| 2  | #NULL! | 1  | 0 | 0  | 0  | 0 |
| 2  | #NULL! | 99 | 0 | 0  | 0  | 0 |
| 4  | #NULL! | 0  | 0 | 99 | 0  | 0 |
| 1  | #NULL! | 0  | 0 | 0  | 0  | 0 |
| 1  | #NULL! | 0  | 0 | 0  | 99 | 0 |
| 1  | #NULL! | 0  | 0 | 1  | 0  | 0 |
| 3  | #NULL! | 0  | 0 | 1  | 0  | 1 |
| 2  | #NULL! | 1  | 0 | 0  | 0  | 0 |
| 1  | #NULL! | 0  | 0 | 1  | 1  | 0 |
| 4  | #NULL! | 1  | 0 | 0  | 0  | 0 |
| 1  | #NULL! | 0  | 0 | 0  | 0  | 0 |
| 1  | #NULL! | 0  | 1 | 0  | 0  | 0 |
| 99 | #NULL! | 0  | 0 | 1  | 0  | 0 |
| 4  | #NULL! | 1  | 0 | 1  | 0  | 0 |
| 1  | #NULL! | 0  | 0 | 0  | 0  | 0 |
| 4  | #NULL! | 0  | 0 | 0  | 0  | 0 |

|    |        |    |    |    |    |    |
|----|--------|----|----|----|----|----|
| 1  | #NULL! | 0  | 0  | 0  | 0  | 0  |
| 1  | #NULL! | 0  | 0  | 0  | 99 | 0  |
| 5  | #NULL! | 99 | 0  | 1  | 0  | 1  |
| 2  | #NULL! | 0  | 0  | 0  | 0  | 0  |
| 2  | #NULL! | 1  | 0  | 99 | 0  | 0  |
| 2  | #NULL! | 99 | 0  | 0  | 0  | 0  |
| 1  | #NULL! | 0  | 1  | 0  | 0  | 0  |
| 1  | #NULL! | 0  | 0  | 0  | 0  | 0  |
| 1  | #NULL! | 0  | 0  | 0  | 1  | 0  |
| 1  | #NULL! | 0  | 0  | 0  | 0  | 0  |
| 1  | #NULL! | 0  | 0  | 0  | 0  | 0  |
| 1  | #NULL! | 0  | 0  | 0  | 0  | 0  |
| 5  | #NULL! | 1  | 1  | 0  | 1  | 1  |
| 1  | #NULL! | 0  | 0  | 0  | 0  | 0  |
| 1  | #NULL! | 0  | 0  | 0  | 0  | 0  |
| 1  | #NULL! | 0  | 0  | 0  | 0  | 0  |
| 2  | #NULL! | 1  | 0  | 0  | 0  | 0  |
| 6  | #NULL! | 1  | 0  | 1  | 0  | 1  |
| 1  | #NULL! | 1  | 0  | 0  | 0  | 0  |
| 1  | #NULL! | 0  | 0  | 0  | 0  | 0  |
| 1  | #NULL! | 0  | 0  | 0  | 0  | 0  |
| 5  | #NULL! | 1  | 0  | 0  | 0  | 0  |
| 2  | #NULL! | 1  | 0  | 1  | 0  | 99 |
| 1  | #NULL! | 0  | 0  | 0  | 0  | 0  |
| 1  | #NULL! | 99 | 99 | 1  | 99 | 1  |
| 1  | #NULL! | 0  | 0  | 0  | 0  | 0  |
| 99 | #NULL! | 0  | 0  | 0  | 0  | 0  |
| 4  | #NULL! | 1  | 0  | 1  | 0  | 1  |
| 1  | #NULL! | 0  | 0  | 0  | 0  | 0  |
| 2  | #NULL! | 1  | 0  | 0  | 0  | 0  |
| 2  | #NULL! | 1  | 0  | 0  | 0  | 0  |
| 4  | #NULL! | 1  | 0  | 0  | 0  | 0  |
| 4  | #NULL! | 0  | 0  | 0  | 0  | 0  |
| 1  | #NULL! | 1  | 0  | 0  | 0  | 0  |
| 1  | #NULL! | 0  | 0  | 1  | 0  | 1  |
| 2  | #NULL! | 99 | 0  | 99 | 1  | 1  |
| 7  | #NULL! | 1  | 0  | 0  | 0  | 0  |
| 99 | #NULL! | 99 | 99 | 99 | 99 | 99 |
| 4  | #NULL! | 1  | 0  | 1  | 0  | 0  |
| 2  | #NULL! | 1  | 0  | 0  | 0  | 1  |
| 1  | #NULL! | 0  | 0  | 0  | 0  | 0  |
| 2  | #NULL! | 1  | 0  | 0  | 0  | 0  |
| 1  | #NULL! | 0  | 0  | 0  | 99 | 0  |
| 1  | #NULL! | 0  | 0  | 0  | 0  | 0  |
| 1  | #NULL! | 1  | 99 | 1  | 99 | 1  |
| 1  | #NULL! | 1  | 0  | 1  | 0  | 0  |
| 5  | #NULL! | 1  | 0  | 1  | 0  | 1  |
| 1  | #NULL! | 0  | 0  | 0  | 0  | 0  |

|    |        |   |    |    |    |    |
|----|--------|---|----|----|----|----|
| 1  | #NULL! | 0 | 0  | 0  | 0  | 0  |
| 1  | #NULL! | 1 | 0  | 0  | 0  | 0  |
| 1  | #NULL! | 0 | 0  | 0  | 0  | 0  |
| 2  | #NULL! | 0 | 0  | 0  | 0  | 99 |
| 1  | #NULL! | 0 | 0  | 0  | 0  | 0  |
| 1  | #NULL! | 0 | 0  | 99 | 0  | 99 |
| 1  | #NULL! | 0 | 0  | 99 | 0  | 0  |
| 2  | #NULL! | 0 | 0  | 1  | 0  | 0  |
| 3  | #NULL! | 0 | 0  | 0  | 0  | 0  |
| 1  | #NULL! | 0 | 1  | 0  | 0  | 0  |
| 1  | #NULL! | 0 | 0  | 0  | 1  | 1  |
| 1  | #NULL! | 0 | 0  | 0  | 0  | 0  |
| 1  | #NULL! | 0 | 0  | 0  | 0  | 0  |
| 4  | #NULL! | 0 | 1  | 99 | 0  | 0  |
| 1  | #NULL! | 0 | 0  | 0  | 0  | 0  |
| 3  | #NULL! | 1 | 0  | 0  | 0  | 1  |
| 1  | #NULL! | 0 | 0  | 0  | 0  | 0  |
| 99 | #NULL! | 1 | 0  | 0  | 0  | 1  |
| 2  | #NULL! | 1 | 0  | 1  | 0  | 1  |
| 3  | #NULL! | 0 | 0  | 1  | 1  | 0  |
| 1  | #NULL! | 0 | 0  | 1  | 0  | 1  |
| 2  | #NULL! | 1 | 0  | 0  | 0  | 0  |
| 3  | #NULL! | 1 | 0  | 0  | 99 | 99 |
| 4  | #NULL! | 1 | 0  | 1  | 0  | 0  |
| 1  | #NULL! | 0 | 0  | 1  | 1  | 1  |
| 2  | #NULL! | 0 | 0  | 99 | 0  | 0  |
| 1  | #NULL! | 0 | 0  | 0  | 0  | 0  |
| 2  | #NULL! | 1 | 0  | 0  | 0  | 0  |
| 4  | #NULL! | 1 | 0  | 1  | 0  | 1  |
| 1  | #NULL! | 0 | 0  | 1  | 0  | 0  |
| 1  | #NULL! | 0 | 0  | 1  | 0  | 1  |
| 4  | #NULL! | 1 | 0  | 0  | 0  | 1  |
| 1  | #NULL! | 0 | 0  | 0  | 0  | 1  |
| 4  | #NULL! | 1 | 99 | 1  | 0  | 1  |
| 1  | #NULL! | 0 | 0  | 0  | 0  | 0  |
| 3  | #NULL! | 1 | 1  | 0  | 0  | 0  |
| 1  | #NULL! | 0 | 0  | 0  | 0  | 0  |
| 1  | #NULL! | 0 | 0  | 99 | 99 | 99 |
| 5  | #NULL! | 0 | 0  | 0  | 0  | 0  |
| 5  | #NULL! | 1 | 0  | 1  | 0  | 1  |
| 2  | #NULL! | 1 | 0  | 0  | 0  | 0  |
| 3  | #NULL! | 1 | 0  | 1  | 0  | 0  |
| 1  | #NULL! | 0 | 0  | 0  | 0  | 0  |
| 1  | #NULL! | 0 | 0  | 0  | 0  | 0  |
| 2  | #NULL! | 0 | 0  | 0  | 0  | 0  |
| 1  | #NULL! | 0 | 1  | 0  | 0  | 0  |
| 1  | #NULL! | 0 | 0  | 0  | 0  | 0  |
| 4  | #NULL! | 1 | 1  | 1  | 1  | 1  |



|   |        |    |    |    |    |    |
|---|--------|----|----|----|----|----|
| 5 | #NULL! | 1  | 1  | 1  | 0  | 1  |
| 3 | #NULL! | 1  | 0  | 1  | 0  | 1  |
| 2 | #NULL! | 1  | 0  | 1  | 0  | 0  |
| 4 | #NULL! | 1  | 0  | 0  | 0  | 0  |
| 4 | #NULL! | 1  | 0  | 1  | 0  | 1  |
| 1 | #NULL! | 0  | 0  | 0  | 0  | 0  |
| 1 | #NULL! | 0  | 0  | 0  | 0  | 0  |
| 4 | #NULL! | 1  | 0  | 0  | 1  | 0  |
| 1 | #NULL! | 1  | 0  | 0  | 0  | 0  |
| 1 | #NULL! | 0  | 0  | 0  | 0  | 0  |
| 1 | #NULL! | 0  | 0  | 0  | 0  | 0  |
| 2 | #NULL! | 1  | 0  | 1  | 0  | 0  |
| 2 | #NULL! | 1  | 0  | 1  | 0  | 0  |
| 1 | #NULL! | 0  | 0  | 0  | 0  | 0  |
| 4 | #NULL! | 0  | 0  | 1  | 0  | 0  |
| 7 | #NULL! | 1  | 0  | 0  | 0  | 0  |
| 1 | #NULL! | 0  | 0  | 0  | 0  | 0  |
| 2 | #NULL! | 1  | 0  | 0  | 0  | 0  |
| 1 | #NULL! | 0  | 0  | 0  | 0  | 0  |
| 1 | #NULL! | 0  | 0  | 0  | 0  | 0  |
| 2 | #NULL! | 99 | 0  | 0  | 0  | 1  |
| 2 | #NULL! | 1  | 0  | 99 | 0  | 0  |
| 1 | #NULL! | 0  | 0  | 1  | 0  | 0  |
| 1 | #NULL! | 0  | 0  | 0  | 0  | 0  |
| 6 | #NULL! | 1  | 1  | 0  | 0  | 0  |
| 4 | #NULL! | 1  | 1  | 1  | 0  | 1  |
| 1 | #NULL! | 0  | 0  | 0  | 0  | 0  |
| 2 | #NULL! | 1  | 0  | 0  | 0  | 0  |
| 1 | #NULL! | 99 | 99 | 99 | 99 | 99 |
| 1 | #NULL! | 0  | 0  | 0  | 0  | 0  |
| 5 | #NULL! | 1  | 0  | 1  | 0  | 0  |
| 1 | #NULL! | 0  | 0  | 1  | 0  | 0  |
| 1 | #NULL! | 0  | 0  | 0  | 0  | 0  |
| 7 | #NULL! | 1  | 0  | 1  | 0  | 0  |
| 1 | #NULL! | 0  | 0  | 0  | 0  | 0  |
| 1 | #NULL! | 0  | 0  | 1  | 0  | 0  |
| 1 | #NULL! | 1  | 0  | 0  | 0  | 0  |
| 1 | #NULL! | 0  | 0  | 0  | 0  | 0  |
| 2 | #NULL! | 1  | 0  | 0  | 0  | 0  |
| 1 | #NULL! | 0  | 0  | 99 | 0  | 0  |
| 1 | #NULL! | 0  | 0  | 0  | 0  | 0  |
| 2 | #NULL! | 0  | 0  | 1  | 1  | 1  |
| 1 | #NULL! | 0  | 0  | 0  | 0  | 0  |
| 1 | #NULL! | 0  | 0  | 0  | 0  | 0  |
| 1 | #NULL! | 0  | 0  | 0  | 0  | 0  |
| 4 | #NULL! | 1  | 0  | 0  | 0  | 0  |
| 1 | #NULL! | 0  | 0  | 0  | 0  | 0  |
| 1 | #NULL! | 0  | 0  | 0  | 0  | 0  |

|   |        |    |    |    |    |    |
|---|--------|----|----|----|----|----|
| 1 | #NULL! | 0  | 0  | 0  | 0  | 1  |
| 4 | #NULL! | 0  | 1  | 0  | 0  | 0  |
| 1 | #NULL! | 0  | 0  | 0  | 0  | 0  |
| 4 | #NULL! | 0  | 1  | 1  | 0  | 1  |
| 4 | #NULL! | 1  | 1  | 0  | 0  | 0  |
| 1 | #NULL! | 0  | 0  | 0  | 0  | 0  |
| 1 | #NULL! | 0  | 0  | 0  | 0  | 0  |
| 2 | #NULL! | 99 | 0  | 1  | 0  | 0  |
| 2 | #NULL! | 99 | 0  | 0  | 0  | 0  |
| 1 | #NULL! | 1  | 99 | 99 | 99 | 1  |
| 4 | #NULL! | 1  | 0  | 1  | 1  | 1  |
| 1 | #NULL! | 0  | 0  | 0  | 0  | 0  |
| 5 | #NULL! | 1  | 0  | 0  | 0  | 0  |
| 1 | #NULL! | 0  | 0  | 1  | 0  | 0  |
| 1 | #NULL! | 0  | 0  | 0  | 0  | 0  |
| 2 | #NULL! | 0  | 0  | 1  | 1  | 1  |
| 1 | #NULL! | 0  | 0  | 0  | 1  | 0  |
| 2 | #NULL! | 1  | 0  | 1  | 0  | 1  |
| 4 | #NULL! | 1  | 1  | 1  | 1  | 1  |
| 4 | #NULL! | 0  | 1  | 1  | 0  | 0  |
| 7 | #NULL! | 1  | 0  | 1  | 1  | 1  |
| 1 | #NULL! | 0  | 0  | 0  | 0  | 0  |
| 1 | #NULL! | 0  | 1  | 1  | 0  | 1  |
| 1 | #NULL! | 0  | 0  | 1  | 0  | 0  |
| 2 | #NULL! | 0  | 0  | 0  | 0  | 0  |
| 2 | #NULL! | 1  | 0  | 1  | 0  | 1  |
| 2 | #NULL! | 0  | 0  | 0  | 0  | 0  |
| 1 | #NULL! | 1  | 99 | 99 | 99 | 99 |
| 1 | #NULL! | 0  | 0  | 0  | 1  | 0  |
| 4 | #NULL! | 1  | 0  | 0  | 99 | 0  |
| 7 | #NULL! | 0  | 99 | 99 | 99 | 99 |
| 1 | #NULL! | 0  | 0  | 0  | 0  | 0  |
| 5 | #NULL! | 1  | 0  | 1  | 1  | 1  |
| 1 | #NULL! | 0  | 0  | 0  | 0  | 0  |
| 1 | #NULL! | 1  | 0  | 0  | 99 | 0  |
| 1 | #NULL! | 0  | 0  | 0  | 0  | 0  |
| 1 | #NULL! | 0  | 0  | 1  | 0  | 0  |
| 1 | #NULL! | 0  | 0  | 0  | 0  | 0  |
| 1 | #NULL! | 0  | 0  | 0  | 0  | 0  |
| 4 | #NULL! | 1  | 0  | 0  | 0  | 0  |
| 1 | #NULL! | 0  | 0  | 0  | 0  | 0  |
| 5 | #NULL! | 1  | 0  | 0  | 0  | 0  |
| 2 | #NULL! | 1  | 0  | 0  | 0  | 0  |
| 1 | #NULL! | 0  | 0  | 0  | 0  | 0  |
| 1 | #NULL! | 0  | 0  | 0  | 0  | 0  |
| 4 | #NULL! | 1  | 0  | 99 | 0  | 0  |
| 1 | #NULL! | 0  | 0  | 0  | 0  | 0  |
| 1 | #NULL! | 1  | 0  | 1  | 0  | 0  |

|    |        |    |    |    |    |    |
|----|--------|----|----|----|----|----|
| 1  | #NULL! | 0  | 0  | 0  | 0  | 0  |
| 1  | #NULL! | 0  | 0  | 1  | 0  | 1  |
| 1  | #NULL! | 0  | 0  | 0  | 0  | 0  |
| 1  | #NULL! | 1  | 0  | 0  | 0  | 0  |
| 1  | #NULL! | 0  | 0  | 0  | 0  | 0  |
| 4  | #NULL! | 1  | 0  | 1  | 1  | 0  |
| 1  | #NULL! | 1  | 0  | 0  | 0  | 0  |
| 1  | #NULL! | 0  | 0  | 0  | 0  | 1  |
| 1  | #NULL! | 0  | 0  | 1  | 0  | 0  |
| 1  | #NULL! | 0  | 0  | 0  | 0  | 0  |
| 4  | #NULL! | 1  | 0  | 0  | 0  | 1  |
| 4  | #NULL! | 1  | 0  | 0  | 0  | 0  |
| 2  | #NULL! | 1  | 0  | 99 | 1  | 0  |
| 2  | #NULL! | 1  | 0  | 0  | 0  | 1  |
| 4  | #NULL! | 0  | 0  | 0  | 0  | 0  |
| 1  | #NULL! | 0  | 0  | 0  | 0  | 0  |
| 4  | #NULL! | 0  | 0  | 0  | 0  | 0  |
| 2  | #NULL! | 1  | 0  | 99 | 0  | 0  |
| 2  | #NULL! | 99 | 0  | 0  | 0  | 0  |
| 99 | #NULL! | 1  | 0  | 0  | 0  | 0  |
| 2  | #NULL! | 1  | 0  | 1  | 0  | 1  |
| 2  | #NULL! | 1  | 0  | 0  | 0  | 0  |
| 1  | #NULL! | 1  | 0  | 1  | 1  | 1  |
| 1  | #NULL! | 0  | 0  | 0  | 0  | 0  |
| 5  | #NULL! | 1  | 0  | 1  | 0  | 1  |
| 1  | #NULL! | 0  | 0  | 0  | 0  | 0  |
| 1  | #NULL! | 0  | 0  | 0  | 0  | 0  |
| 4  | #NULL! | 1  | 1  | 1  | 1  | 1  |
| 5  | #NULL! | 1  | 0  | 0  | 0  | 0  |
| 1  | #NULL! | 0  | 0  | 1  | 0  | 0  |
| 2  | #NULL! | 1  | 0  | 0  | 0  | 0  |
| 4  | #NULL! | 0  | 0  | 0  | 0  | 0  |
| 1  | #NULL! | 0  | 0  | 0  | 0  | 0  |
| 2  | #NULL! | 0  | 0  | 1  | 0  | 0  |
| 4  | #NULL! | 1  | 0  | 0  | 0  | 0  |
| 5  | #NULL! | 99 | 99 | 99 | 99 | 1  |
| 3  | #NULL! | 0  | 1  | 0  | 0  | 0  |
| 1  | #NULL! | 0  | 0  | 1  | 0  | 1  |
| 1  | #NULL! | 0  | 0  | 0  | 0  | 0  |
| 1  | #NULL! | 0  | 0  | 0  | 0  | 0  |
| 1  | #NULL! | 0  | 0  | 1  | 0  | 0  |
| 1  | #NULL! | 0  | 0  | 0  | 0  | 0  |
| 1  | #NULL! | 1  | 0  | 0  | 0  | 0  |
| 4  | #NULL! | 0  | 0  | 1  | 0  | 1  |
| 1  | #NULL! | 0  | 0  | 1  | 1  | 0  |
| 4  | #NULL! | 1  | 0  | 1  | 1  | 1  |
| 1  | #NULL! | 0  | 0  | 0  | 0  | 0  |
| 1  | #NULL! | 99 | 99 | 99 | 99 | 99 |

|   |        |    |   |    |    |    |
|---|--------|----|---|----|----|----|
| 2 | #NULL! | 1  | 0 | 0  | 0  | 0  |
| 6 | #NULL! | 0  | 0 | 0  | 0  | 0  |
| 4 | #NULL! | 1  | 0 | 1  | 0  | 1  |
| 1 | #NULL! | 0  | 0 | 0  | 0  | 0  |
| 4 | #NULL! | 1  | 0 | 1  | 0  | 1  |
| 4 | #NULL! | 1  | 0 | 0  | 1  | 1  |
| 4 | #NULL! | 0  | 1 | 1  | 0  | 0  |
| 4 | #NULL! | 0  | 1 | 1  | 1  | 1  |
| 4 | #NULL! | 1  | 0 | 1  | 0  | 1  |
| 5 | #NULL! | 1  | 0 | 0  | 0  | 0  |
| 1 | #NULL! | 0  | 0 | 0  | 0  | 0  |
| 4 | #NULL! | 1  | 0 | 0  | 0  | 1  |
| 4 | #NULL! | 1  | 0 | 1  | 0  | 0  |
| 1 | #NULL! | 0  | 0 | 0  | 0  | 0  |
| 7 | #NULL! | 1  | 0 | 0  | 0  | 1  |
| 2 | #NULL! | 0  | 0 | 1  | 0  | 0  |
| 2 | #NULL! | 1  | 0 | 1  | 0  | 0  |
| 1 | #NULL! | 0  | 0 | 0  | 0  | 0  |
| 1 | #NULL! | 0  | 0 | 99 | 99 | 99 |
| 5 | #NULL! | 0  | 1 | 0  | 0  | 0  |
| 2 | #NULL! | 0  | 0 | 1  | 1  | 1  |
| 2 | #NULL! | 1  | 0 | 0  | 1  | 0  |
| 1 | #NULL! | 0  | 0 | 0  | 0  | 0  |
| 2 | #NULL! | 0  | 0 | 0  | 0  | 0  |
| 1 | #NULL! | 0  | 0 | 0  | 0  | 0  |
| 2 | #NULL! | 0  | 0 | 1  | 0  | 0  |
| 4 | #NULL! | 0  | 1 | 0  | 0  | 1  |
| 1 | #NULL! | 0  | 0 | 0  | 0  | 0  |
| 4 | #NULL! | 99 | 0 | 1  | 99 | 99 |
| 1 | #NULL! | 1  | 1 | 1  | 0  | 1  |
| 4 | #NULL! | 1  | 1 | 99 | 0  | 0  |
| 1 | #NULL! | 0  | 0 | 0  | 0  | 0  |
| 1 | #NULL! | 0  | 0 | 0  | 0  | 0  |
| 1 | #NULL! | 0  | 0 | 0  | 0  | 0  |
| 2 | #NULL! | 0  | 0 | 0  | 0  | 0  |
| 1 | #NULL! | 0  | 0 | 0  | 0  | 0  |
| 1 | #NULL! | 0  | 0 | 0  | 0  | 1  |
| 4 | #NULL! | 0  | 1 | 1  | 0  | 0  |
| 1 | #NULL! | 0  | 1 | 0  | 0  | 0  |
| 1 | #NULL! | 0  | 0 | 0  | 0  | 1  |
| 2 | #NULL! | 0  | 0 | 0  | 0  | 0  |
| 1 | #NULL! | 0  | 0 | 0  | 0  | 0  |
| 4 | #NULL! | 0  | 0 | 1  | 0  | 1  |
| 2 | #NULL! | 0  | 0 | 0  | 0  | 1  |
| 2 | #NULL! | 1  | 0 | 0  | 1  | 1  |
| 1 | #NULL! | 0  | 0 | 1  | 0  | 1  |
| 1 | #NULL! | 0  | 0 | 0  | 0  | 0  |
| 1 | #NULL! | 0  | 0 | 0  | 1  | 1  |

|    |        |    |    |    |    |    |
|----|--------|----|----|----|----|----|
| 1  | #NULL! | 0  | 0  | 0  | 0  | 0  |
| 1  | #NULL! | 0  | 0  | 0  | 0  | 0  |
| 2  | #NULL! | 99 | 0  | 1  | 0  | 0  |
| 1  | #NULL! | 0  | 0  | 0  | 0  | 0  |
| 1  | #NULL! | 0  | 0  | 0  | 0  | 0  |
| 1  | #NULL! | 0  | 0  | 0  | 99 | 0  |
| 4  | #NULL! | 1  | 0  | 0  | 0  | 1  |
| 1  | #NULL! | 1  | 0  | 0  | 0  | 0  |
| 2  | #NULL! | 1  | 0  | 1  | 0  | 0  |
| 1  | #NULL! | 0  | 0  | 1  | 0  | 0  |
| 1  | #NULL! | 0  | 0  | 0  | 0  | 0  |
| 7  | #NULL! | 0  | 0  | 1  | 0  | 1  |
| 1  | #NULL! | 0  | 0  | 0  | 0  | 0  |
| 2  | #NULL! | 1  | 0  | 1  | 0  | 1  |
| 1  | #NULL! | 0  | 0  | 0  | 0  | 0  |
| 1  | #NULL! | 0  | 0  | 0  | 0  | 0  |
| 5  | #NULL! | 1  | 0  | 1  | 0  | 1  |
| 1  | #NULL! | 0  | 0  | 99 | 0  | 0  |
| 1  | #NULL! | 99 | 99 | 99 | 99 | 99 |
| 4  | #NULL! | 0  | 0  | 1  | 0  | 1  |
| 4  | #NULL! | 1  | 0  | 0  | 0  | 1  |
| 1  | #NULL! | 0  | 0  | 0  | 0  | 0  |
| 2  | #NULL! | 0  | 0  | 1  | 1  | 0  |
| 1  | #NULL! | 0  | 0  | 0  | 0  | 0  |
| 1  | #NULL! | 1  | 0  | 1  | 0  | 0  |
| 2  | #NULL! | 0  | 0  | 1  | 0  | 1  |
| 1  | #NULL! | 0  | 0  | 0  | 0  | 0  |
| 1  | #NULL! | 0  | 0  | 1  | 0  | 0  |
| 3  | #NULL! | 1  | 0  | 0  | 0  | 99 |
| 4  | #NULL! | 1  | 1  | 0  | 1  | 1  |
| 1  | #NULL! | 0  | 0  | 0  | 1  | 0  |
| 99 | #NULL! | 99 | 99 | 99 | 99 | 99 |
| 1  | #NULL! | 0  | 0  | 0  | 0  | 1  |
| 1  | #NULL! | 0  | 1  | 0  | 0  | 0  |
| 4  | #NULL! | 0  | 0  | 0  | 0  | 0  |
| 1  | #NULL! | 0  | 0  | 1  | 0  | 0  |
| 1  | #NULL! | 0  | 0  | 0  | 0  | 0  |
| 2  | #NULL! | 1  | 0  | 0  | 0  | 0  |
| 1  | #NULL! | 0  | 0  | 1  | 0  | 1  |
| 4  | #NULL! | 1  | 0  | 0  | 0  | 0  |
| 1  | #NULL! | 1  | 0  | 0  | 0  | 0  |
| 1  | #NULL! | 0  | 0  | 1  | 0  | 1  |
| 4  | #NULL! | 0  | 0  | 1  | 0  | 1  |
| 1  | #NULL! | 0  | 0  | 0  | 0  | 0  |
| 3  | #NULL! | 1  | 0  | 1  | 0  | 1  |
| 1  | #NULL! | 0  | 0  | 1  | 0  | 0  |
| 2  | #NULL! | 1  | 0  | 1  | 0  | 1  |
| 1  | #NULL! | 0  | 0  | 0  | 1  | 0  |

|    |        |    |    |    |    |    |
|----|--------|----|----|----|----|----|
| 1  | #NULL! | 0  | 0  | 0  | 0  | 0  |
| 1  | #NULL! | 0  | 0  | 0  | 0  | 0  |
| 2  | #NULL! | 1  | 0  | 1  | 0  | 0  |
| 4  | #NULL! | 0  | 0  | 0  | 0  | 0  |
| 2  | #NULL! | 1  | 0  | 1  | 1  | 1  |
| 4  | #NULL! | 1  | 0  | 1  | 0  | 1  |
| 5  | #NULL! | 0  | 0  | 0  | 0  | 0  |
| 2  | #NULL! | 1  | 0  | 99 | 0  | 0  |
| 4  | #NULL! | 0  | 0  | 0  | 0  | 0  |
| 4  | #NULL! | 1  | 0  | 0  | 0  | 0  |
| 4  | #NULL! | 1  | 0  | 0  | 0  | 1  |
| 4  | #NULL! | 1  | 0  | 1  | 0  | 0  |
| 1  | #NULL! | 1  | 0  | 0  | 0  | 0  |
| 1  | #NULL! | 0  | 0  | 0  | 0  | 0  |
| 1  | #NULL! | 0  | 0  | 0  | 0  | 0  |
| 7  | #NULL! | 0  | 0  | 0  | 0  | 0  |
| 1  | #NULL! | 0  | 0  | 0  | 0  | 0  |
| 99 | #NULL! | 99 | 0  | 1  | 0  | 0  |
| 1  | #NULL! | 0  | 0  | 0  | 0  | 0  |
| 1  | #NULL! | 0  | 0  | 0  | 0  | 0  |
| 1  | #NULL! | 0  | 0  | 1  | 0  | 0  |
| 1  | #NULL! | 1  | 1  | 1  | 1  | 1  |
| 1  | #NULL! | 0  | 0  | 0  | 0  | 0  |
| 1  | #NULL! | 99 | 99 | 99 | 99 | 99 |
| 5  | #NULL! | 1  | 0  | 1  | 0  | 0  |
| 1  | #NULL! | 0  | 0  | 0  | 0  | 0  |
| 1  | #NULL! | 1  | 0  | 0  | 0  | 0  |
| 1  | #NULL! | 0  | 0  | 1  | 0  | 0  |
| 1  | #NULL! | 0  | 0  | 0  | 0  | 0  |
| 2  | #NULL! | 1  | 0  | 0  | 0  | 0  |
| 1  | #NULL! | 0  | 0  | 1  | 0  | 1  |
| 1  | #NULL! | 0  | 0  | 0  | 0  | 0  |
| 5  | #NULL! | 0  | 0  | 0  | 0  | 0  |
| 4  | #NULL! | 1  | 0  | 1  | 0  | 0  |
| 4  | #NULL! | 1  | 0  | 1  | 0  | 0  |
| 1  | #NULL! | 0  | 0  | 0  | 0  | 0  |
| 2  | #NULL! | 1  | 0  | 1  | 0  | 0  |
| 7  | #NULL! | 0  | 0  | 1  | 0  | 0  |
| 1  | #NULL! | 0  | 0  | 1  | 0  | 1  |
| 5  | #NULL! | 1  | 0  | 0  | 0  | 0  |
| 1  | #NULL! | 0  | 0  | 0  | 0  | 0  |
| 1  | #NULL! | 0  | 0  | 0  | 0  | 0  |
| 1  | #NULL! | 0  | 0  | 0  | 0  | 0  |
| 4  | #NULL! | 1  | 0  | 0  | 0  | 1  |
| 1  | #NULL! | 0  | 0  | 0  | 0  | 0  |
| 1  | #NULL! | 0  | 0  | 0  | 0  | 0  |
| 4  | #NULL! | 1  | 0  | 0  | 0  | 0  |
| 7  | #NULL! | 0  | 1  | 1  | 0  | 0  |

|    |        |    |    |    |    |    |
|----|--------|----|----|----|----|----|
| 1  | #NULL! | 0  | 0  | 1  | 0  | 0  |
| 1  | #NULL! | 0  | 0  | 0  | 0  | 0  |
| 1  | #NULL! | 1  | 0  | 0  | 0  | 0  |
| 1  | #NULL! | 0  | 0  | 0  | 0  | 0  |
| 1  | #NULL! | 0  | 0  | 0  | 0  | 0  |
| 1  | #NULL! | 0  | 0  | 0  | 0  | 0  |
| 1  | #NULL! | 0  | 0  | 0  | 0  | 0  |
| 99 | #NULL! | 0  | 0  | 1  | 1  | 0  |
| 1  | #NULL! | 0  | 0  | 0  | 0  | 0  |
| 1  | #NULL! | 0  | 0  | 0  | 0  | 0  |
| 4  | #NULL! | 1  | 0  | 0  | 1  | 0  |
| 1  | #NULL! | 0  | 0  | 0  | 0  | 0  |
| 1  | #NULL! | 0  | 0  | 99 | 0  | 0  |
| 1  | #NULL! | 0  | 0  | 0  | 0  | 0  |
| 7  | #NULL! | 0  | 0  | 99 | 1  | 0  |
| 1  | #NULL! | 0  | 0  | 0  | 0  | 0  |
| 2  | #NULL! | 1  | 0  | 0  | 1  | 0  |
| 1  | #NULL! | 0  | 0  | 0  | 0  | 0  |
| 2  | #NULL! | 0  | 0  | 0  | 0  | 1  |
| 4  | #NULL! | 1  | 0  | 0  | 1  | 1  |
| 1  | #NULL! | 0  | 0  | 0  | 0  | 0  |
| 1  | #NULL! | 0  | 0  | 0  | 0  | 0  |
| 5  | #NULL! | 0  | 0  | 0  | 0  | 0  |
| 1  | #NULL! | 0  | 0  | 0  | 0  | 0  |
| 2  | #NULL! | 1  | 0  | 0  | 0  | 0  |
| 1  | #NULL! | 0  | 0  | 0  | 0  | 0  |
| 4  | #NULL! | 1  | 0  | 0  | 0  | 1  |
| 2  | #NULL! | 1  | 0  | 0  | 0  | 0  |
| 2  | #NULL! | 0  | 0  | 1  | 0  | 1  |
| 1  | #NULL! | 0  | 0  | 0  | 0  | 0  |
| 1  | #NULL! | 0  | 0  | 1  | 0  | 0  |
| 2  | #NULL! | 0  | 0  | 0  | 0  | 1  |
| 2  | #NULL! | 0  | 0  | 0  | 0  | 0  |
| 1  | #NULL! | 0  | 0  | 1  | 0  | 0  |
| 1  | #NULL! | 0  | 0  | 0  | 0  | 0  |
| 4  | #NULL! | 1  | 0  | 1  | 0  | 0  |
| 5  | #NULL! | 0  | 0  | 0  | 0  | 0  |
| 1  | #NULL! | 0  | 0  | 0  | 0  | 0  |
| 1  | #NULL! | 1  | 0  | 0  | 0  | 0  |
| 1  | #NULL! | 0  | 0  | 1  | 0  | 1  |
| 1  | #NULL! | 0  | 1  | 0  | 0  | 1  |
| 1  | #NULL! | 1  | 99 | 99 | 99 | 99 |
| 1  | #NULL! | 0  | 0  | 0  | 0  | 0  |
| 2  | #NULL! | 0  | 0  | 1  | 1  | 0  |
| 4  | #NULL! | 99 | 99 | 99 | 99 | 99 |
| 1  | #NULL! | 1  | 1  | 1  | 1  | 1  |
| 4  | #NULL! | 1  | 0  | 1  | 0  | 0  |
| 4  | #NULL! | 1  | 1  | 0  | 0  | 0  |

|    |        |    |    |    |    |    |
|----|--------|----|----|----|----|----|
| 1  | #NULL! | 0  | 0  | 1  | 0  | 0  |
| 1  | #NULL! | 0  | 0  | 1  | 0  | 0  |
| 2  | #NULL! | 0  | 0  | 1  | 0  | 0  |
| 99 | #NULL! | 0  | 1  | 1  | 0  | 0  |
| 4  | #NULL! | 1  | 0  | 0  | 0  | 0  |
| 1  | #NULL! | 0  | 0  | 0  | 0  | 0  |
| 1  | #NULL! | 0  | 0  | 0  | 0  | 0  |
| 1  | #NULL! | 0  | 0  | 0  | 0  | 0  |
| 7  | #NULL! | 0  | 1  | 0  | 0  | 0  |
| 4  | #NULL! | 1  | 0  | 1  | 0  | 0  |
| 2  | #NULL! | 99 | 99 | 0  | 99 | 99 |
| 1  | #NULL! | 1  | 0  | 1  | 0  | 1  |
| 1  | #NULL! | 0  | 1  | 0  | 0  | 0  |
| 1  | #NULL! | 0  | 0  | 0  | 0  | 0  |
| 1  | #NULL! | 0  | 0  | 0  | 0  | 0  |
| 4  | #NULL! | 1  | 0  | 0  | 0  | 0  |
| 1  | #NULL! | 0  | 0  | 0  | 0  | 0  |
| 4  | #NULL! | 1  | 0  | 1  | 0  | 1  |
| 3  | #NULL! | 1  | 1  | 1  | 0  | 1  |
| 4  | #NULL! | 1  | 0  | 0  | 0  | 0  |
| 2  | #NULL! | 1  | 0  | 0  | 0  | 0  |
| 1  | #NULL! | 0  | 0  | 0  | 0  | 0  |
| 1  | #NULL! | 0  | 0  | 0  | 0  | 0  |
| 1  | #NULL! | 1  | 0  | 0  | 0  | 0  |
| 1  | #NULL! | 0  | 0  | 0  | 0  | 0  |
| 1  | #NULL! | 1  | 0  | 0  | 0  | 0  |
| 1  | #NULL! | 0  | 0  | 1  | 0  | 1  |
| 2  | #NULL! | 1  | 0  | 0  | 0  | 0  |
| 5  | #NULL! | 1  | 1  | 0  | 1  | 1  |
| 1  | #NULL! | 1  | 0  | 0  | 0  | 0  |
| 1  | #NULL! | 0  | 0  | 0  | 0  | 0  |
| 4  | #NULL! | 0  | 0  | 1  | 1  | 1  |
| 1  | #NULL! | 0  | 0  | 0  | 0  | 1  |
| 7  | #NULL! | 1  | 99 | 99 | 99 | 99 |
| 4  | #NULL! | 0  | 0  | 0  | 1  | 0  |
| 1  | #NULL! | 0  | 0  | 0  | 0  | 1  |
| 4  | #NULL! | 1  | 0  | 0  | 0  | 1  |
| 2  | #NULL! | 1  | 0  | 0  | 0  | 0  |
| 5  | #NULL! | 0  | 1  | 1  | 0  | 1  |
| 1  | #NULL! | 0  | 0  | 0  | 0  | 0  |
| 4  | #NULL! | 0  | 0  | 1  | 0  | 1  |
| 1  | #NULL! | 1  | 0  | 0  | 1  | 1  |
| 1  | #NULL! | 0  | 0  | 0  | 0  | 0  |
| 1  | #NULL! | 0  | 0  | 1  | 0  | 1  |
| 1  | #NULL! | 0  | 0  | 0  | 0  | 0  |
| 4  | #NULL! | 0  | 0  | 0  | 0  | 0  |
| 1  | #NULL! | 0  | 0  | 0  | 0  | 0  |



|   |        |    |    |    |    |    |
|---|--------|----|----|----|----|----|
| 1 | #NULL! | 1  | 0  | 0  | 0  | 0  |
| 4 | #NULL! | 1  | 0  | 0  | 1  | 1  |
| 1 | #NULL! | 0  | 0  | 0  | 0  | 0  |
| 4 | #NULL! | 1  | 0  | 0  | 0  | 0  |
| 1 | #NULL! | 0  | 0  | 0  | 0  | 0  |
| 2 | #NULL! | 1  | 0  | 0  | 0  | 0  |
| 5 | #NULL! | 0  | 1  | 1  | 0  | 1  |
| 7 | #NULL! | 1  | 0  | 0  | 0  | 0  |
| 1 | #NULL! | 0  | 0  | 0  | 1  | 0  |
| 4 | #NULL! | 0  | 0  | 1  | 0  | 0  |
| 4 | #NULL! | 0  | 0  | 0  | 1  | 0  |
| 1 | #NULL! | 0  | 0  | 1  | 0  | 0  |
| 1 | #NULL! | 0  | 0  | 1  | 0  | 0  |
| 1 | #NULL! | 0  | 0  | 0  | 0  | 0  |
| 2 | #NULL! | 1  | 0  | 0  | 0  | 0  |
| 2 | #NULL! | 0  | 0  | 0  | 0  | 0  |
| 1 | #NULL! | 0  | 0  | 0  | 0  | 0  |
| 2 | #NULL! | 0  | 1  | 0  | 0  | 0  |
| 4 | #NULL! | 1  | 0  | 0  | 1  | 0  |
| 1 | #NULL! | 0  | 0  | 0  | 0  | 0  |
| 4 | #NULL! | 1  | 0  | 0  | 0  | 1  |
| 1 | #NULL! | 0  | 0  | 0  | 1  | 0  |
| 1 | #NULL! | 0  | 0  | 1  | 0  | 0  |
| 1 | #NULL! | 0  | 0  | 0  | 0  | 0  |
| 1 | #NULL! | 0  | 0  | 0  | 0  | 0  |
| 4 | #NULL! | 0  | 0  | 0  | 0  | 0  |
| 2 | #NULL! | 1  | 0  | 0  | 0  | 0  |
| 1 | #NULL! | 1  | 99 | 99 | 99 | 99 |
| 1 | #NULL! | 0  | 0  | 0  | 1  | 0  |
| 1 | #NULL! | 0  | 0  | 0  | 0  | 0  |
| 4 | #NULL! | 1  | 0  | 1  | 1  | 1  |
| 1 | #NULL! | 0  | 0  | 0  | 0  | 0  |
| 1 | #NULL! | 0  | 0  | 0  | 0  | 0  |
| 5 | #NULL! | 1  | 0  | 0  | 99 | 1  |
| 2 | #NULL! | 1  | 0  | 0  | 0  | 0  |
| 1 | #NULL! | 0  | 0  | 0  | 0  | 0  |
| 1 | #NULL! | 1  | 0  | 0  | 0  | 0  |
| 4 | #NULL! | 1  | 0  | 0  | 0  | 0  |
| 1 | #NULL! | 0  | 0  | 1  | 0  | 0  |
| 1 | #NULL! | 0  | 0  | 0  | 0  | 0  |
| 4 | #NULL! | 0  | 1  | 99 | 1  | 99 |
| 1 | #NULL! | 0  | 0  | 0  | 0  | 0  |
| 3 | #NULL! | 1  | 0  | 99 | 1  | 0  |
| 4 | #NULL! | 0  | 0  | 0  | 0  | 0  |
| 1 | #NULL! | 0  | 0  | 0  | 0  | 0  |
| 2 | #NULL! | 0  | 0  | 1  | 0  | 0  |
| 5 | #NULL! | 0  | 0  | 1  | 0  | 1  |
| 1 | #NULL! | 99 | 0  | 99 | 0  | 1  |

|   |        |   |    |    |    |   |
|---|--------|---|----|----|----|---|
| 1 | #NULL! | 0 | 0  | 1  | 0  | 0 |
| 2 | #NULL! | 1 | 0  | 0  | 1  | 0 |
| 1 | #NULL! | 0 | 0  | 1  | 1  | 0 |
| 1 | #NULL! | 0 | 0  | 99 | 99 | 0 |
| 7 | #NULL! | 0 | 0  | 0  | 0  | 0 |
| 1 | #NULL! | 0 | 0  | 0  | 1  | 1 |
| 1 | #NULL! | 0 | 0  | 0  | 0  | 0 |
| 1 | #NULL! | 0 | 0  | 1  | 0  | 0 |
| 4 | #NULL! | 0 | 0  | 1  | 0  | 0 |
| 1 | #NULL! | 1 | 0  | 0  | 0  | 0 |
| 2 | #NULL! | 0 | 0  | 0  | 0  | 0 |
| 5 | #NULL! | 1 | 99 | 1  | 0  | 1 |
| 4 | #NULL! | 1 | 0  | 1  | 0  | 1 |
| 1 | #NULL! | 0 | 0  | 0  | 0  | 0 |
| 1 | #NULL! | 0 | 0  | 0  | 0  | 0 |
| 2 | #NULL! | 1 | 0  | 1  | 0  | 0 |
| 2 | #NULL! | 1 | 1  | 1  | 1  | 1 |
| 1 | #NULL! | 0 | 0  | 0  | 0  | 0 |
| 2 | #NULL! | 1 | 0  | 0  | 99 | 0 |
| 1 | #NULL! | 0 | 0  | 0  | 0  | 0 |
| 1 | #NULL! | 1 | 0  | 0  | 0  | 0 |
| 7 | #NULL! | 1 | 0  | 0  | 0  | 0 |
| 1 | #NULL! | 0 | 0  | 0  | 0  | 0 |
| 2 | #NULL! | 1 | 0  | 1  | 0  | 1 |
| 1 | #NULL! | 0 | 0  | 0  | 0  | 0 |
| 1 | #NULL! | 1 | 0  | 1  | 1  | 1 |
| 4 | #NULL! | 1 | 0  | 0  | 0  | 0 |
| 1 | #NULL! | 0 | 0  | 0  | 0  | 0 |
| 1 | #NULL! | 0 | 0  | 0  | 0  | 0 |
| 2 | #NULL! | 1 | 0  | 1  | 0  | 0 |
| 1 | #NULL! | 0 | 0  | 0  | 0  | 1 |
| 2 | #NULL! | 1 | 0  | 0  | 0  | 0 |
| 1 | #NULL! | 1 | 0  | 1  | 0  | 0 |
| 3 | #NULL! | 1 | 0  | 1  | 1  | 1 |
| 1 | #NULL! | 1 | 0  | 0  | 0  | 0 |
| 2 | #NULL! | 1 | 0  | 0  | 1  | 1 |
| 1 | #NULL! | 0 | 0  | 0  | 0  | 0 |
| 3 | #NULL! | 1 | 0  | 0  | 0  | 0 |
| 4 | #NULL! | 1 | 0  | 0  | 0  | 0 |
| 1 | #NULL! | 0 | 0  | 0  | 0  | 0 |
| 1 | #NULL! | 0 | 1  | 1  | 0  | 1 |
| 4 | #NULL! | 0 | 0  | 1  | 0  | 1 |
| 1 | #NULL! | 0 | 0  | 0  | 0  | 0 |
| 1 | #NULL! | 0 | 0  | 0  | 0  | 0 |
| 2 | #NULL! | 0 | 0  | 1  | 1  | 1 |
| 4 | #NULL! | 1 | 99 | 0  | 0  | 0 |
| 1 | #NULL! | 1 | 0  | 0  | 0  | 0 |
| 1 | #NULL! | 0 | 0  | 0  | 0  | 0 |

|   |        |   |   |   |   |   |
|---|--------|---|---|---|---|---|
| 4 | #NULL! | 0 | 0 | 0 | 1 | 0 |
| 1 | #NULL! | 1 | 0 | 0 | 1 | 0 |
| 1 | #NULL! | 0 | 0 | 0 | 0 | 0 |
| 1 | #NULL! | 0 | 0 | 0 | 0 | 0 |
| 1 | #NULL! | 0 | 0 | 1 | 0 | 1 |
| 1 | #NULL! | 0 | 0 | 1 | 0 | 0 |
| 1 | #NULL! | 0 | 0 | 0 | 0 | 0 |
| 4 | #NULL! | 1 | 0 | 1 | 1 | 1 |
| 4 | #NULL! | 1 | 0 | 1 | 1 | 1 |
| 4 | #NULL! | 1 | 0 | 1 | 1 | 1 |
| 1 | #NULL! | 0 | 0 | 0 | 0 | 0 |
| 4 | #NULL! | 1 | 0 | 1 | 1 | 1 |
| 1 | #NULL! | 0 | 0 | 0 | 0 | 0 |
| 1 | #NULL! | 0 | 0 | 0 | 0 | 0 |
| 1 | #NULL! | 0 | 0 | 0 | 0 | 0 |
| 4 | #NULL! | 1 | 0 | 0 | 1 | 1 |
| 1 | #NULL! | 0 | 0 | 0 | 0 | 0 |
| 1 | #NULL! | 0 | 0 | 0 | 0 | 0 |
| 1 | #NULL! | 1 | 0 | 0 | 0 | 0 |
| 4 | #NULL! | 0 | 0 | 1 | 0 | 1 |
| 4 | #NULL! | 1 | 1 | 1 | 1 | 0 |
| 1 | #NULL! | 1 | 0 | 0 | 0 | 0 |
| 1 | #NULL! | 0 | 0 | 0 | 0 | 1 |
| 1 | #NULL! | 0 | 0 | 0 | 0 | 0 |
| 1 | #NULL! | 0 | 0 | 0 | 0 | 0 |
| 2 | #NULL! | 0 | 0 | 1 | 0 | 0 |
| 1 | #NULL! | 0 | 0 | 0 | 0 | 0 |
| 5 | #NULL! | 0 | 0 | 0 | 1 | 0 |
| 2 | #NULL! | 1 | 0 | 1 | 0 | 0 |
| 1 | #NULL! | 0 | 0 | 0 | 0 | 0 |
| 1 | #NULL! | 0 | 0 | 0 | 0 | 0 |
| 4 | #NULL! | 1 | 0 | 0 | 0 | 0 |
| 4 | #NULL! | 1 | 0 | 0 | 1 | 0 |
| 4 | #NULL! | 1 | 0 | 0 | 0 | 0 |
| 5 | #NULL! | 1 | 0 | 1 | 0 | 1 |
| 1 | #NULL! | 0 | 0 | 0 | 0 | 0 |
| 1 | #NULL! | 0 | 0 | 1 | 0 | 0 |
| 4 | #NULL! | 0 | 0 | 1 | 1 | 1 |
| 1 | #NULL! | 0 | 0 | 0 | 0 | 0 |
| 4 | #NULL! | 1 | 0 | 0 | 0 | 0 |
| 1 | #NULL! | 0 | 0 | 0 | 0 | 0 |
| 1 | #NULL! | 0 | 0 | 0 | 1 | 0 |
| 1 | #NULL! | 0 | 0 | 0 | 0 | 0 |
| 7 | #NULL! | 0 | 0 | 0 | 1 | 1 |
| 5 | #NULL! | 0 | 0 | 0 | 1 | 0 |
| 1 | #NULL! | 0 | 0 | 0 | 1 | 0 |
| 4 | #NULL! | 1 | 0 | 0 | 0 | 0 |

|   |        |   |   |   |   |   |
|---|--------|---|---|---|---|---|
| 1 | #NULL! | 0 | 0 | 0 | 0 | 0 |
| 5 | #NULL! | 0 | 0 | 1 | 0 | 1 |
| 1 | #NULL! | 0 | 0 | 0 | 1 | 0 |
| 1 | #NULL! | 1 | 0 | 0 | 0 | 0 |
| 5 | #NULL! | 0 | 0 | 0 | 0 | 0 |
| 1 | #NULL! | 1 | 0 | 0 | 0 | 0 |
| 4 | #NULL! | 0 | 0 | 0 | 1 | 0 |
| 1 | #NULL! | 1 | 0 | 0 | 0 | 0 |
| 1 | #NULL! | 0 | 0 | 0 | 0 | 1 |
| 2 | #NULL! | 1 | 0 | 1 | 0 | 1 |
| 7 | #NULL! | 0 | 0 | 0 | 0 | 0 |
| 5 | #NULL! | 1 | 1 | 1 | 1 | 1 |
| 2 | #NULL! | 0 | 0 | 1 | 0 | 0 |
| 2 | #NULL! | 0 | 0 | 1 | 1 | 0 |
| 1 | #NULL! | 0 | 0 | 0 | 0 | 0 |
| 1 | #NULL! | 0 | 0 | 0 | 0 | 0 |
| 1 | #NULL! | 0 | 0 | 0 | 0 | 0 |
| 1 | #NULL! | 0 | 0 | 0 | 0 | 0 |
| 1 | #NULL! | 0 | 0 | 0 | 0 | 0 |
| 1 | #NULL! | 0 | 0 | 0 | 0 | 0 |
| 1 | #NULL! | 0 | 0 | 0 | 0 | 0 |
| 1 | #NULL! | 0 | 0 | 0 | 0 | 0 |
| 1 | #NULL! | 0 | 0 | 0 | 0 | 0 |
| 1 | #NULL! | 0 | 0 | 0 | 0 | 0 |
| 1 | #NULL! | 0 | 0 | 0 | 0 | 0 |
| 1 | #NULL! | 0 | 0 | 0 | 0 | 0 |
| 1 | #NULL! | 0 | 0 | 0 | 0 | 0 |
| 1 | #NULL! | 0 | 0 | 0 | 0 | 0 |
| 2 | #NULL! | 0 | 0 | 0 | 0 | 0 |
| 7 | #NULL! | 1 | 0 | 0 | 0 | 0 |
| 1 | #NULL! | 0 | 0 | 0 | 0 | 0 |
| 2 | #NULL! | 1 | 0 | 0 | 0 | 1 |
| 1 | #NULL! | 1 | 1 | 0 | 0 | 1 |
| 1 | #NULL! | 0 | 0 | 0 | 0 | 0 |
| 1 | #NULL! | 0 | 0 | 0 | 0 | 0 |
| 1 | #NULL! | 0 | 0 | 0 | 0 | 0 |
| 5 | #NULL! | 1 | 0 | 0 | 0 | 0 |
| 2 | #NULL! | 0 | 0 | 1 | 0 | 0 |
| 1 | #NULL! | 0 | 0 | 0 | 0 | 0 |
| 5 | #NULL! | 0 | 0 | 0 | 0 | 0 |
| 2 | #NULL! | 0 | 0 | 0 | 0 | 1 |
| 2 | #NULL! | 1 | 0 | 1 | 0 | 0 |
| 4 | #NULL! | 1 | 0 | 0 | 0 | 0 |
| 1 | #NULL! | 0 | 0 | 0 | 0 | 0 |
| 1 | #NULL! | 0 | 0 | 0 | 0 | 0 |
| 2 | #NULL! | 1 | 0 | 0 | 0 | 0 |
| 7 | #NULL! | 1 | 0 | 0 | 0 | 0 |
| 1 | #NULL! | 0 | 0 | 0 | 0 | 0 |
| 1 | #NULL! | 1 | 0 | 0 | 0 | 0 |
| 4 | #NULL! | 1 | 0 | 1 | 0 | 1 |
| 3 | #NULL! | 1 | 0 | 1 | 1 | 1 |
| 2 | #NULL! | 0 | 0 | 1 | 0 | 0 |
| 1 | #NULL! | 0 | 1 | 0 | 0 | 0 |

|   |        |   |        |        |        |        |
|---|--------|---|--------|--------|--------|--------|
| 4 | #NULL! | 1 | 0      | 1      | 1      | 1      |
| 1 | #NULL! | 0 | 0      | 1      | 0      | 0      |
| 4 | #NULL! | 1 | 0      | 0      | 1      | 0      |
| 1 | #NULL! | 0 | 0      | 0      | 0      | 0      |
| 2 | #NULL! | 1 | 0      | 1      | 0      | 0      |
| 1 | #NULL! | 0 | 0      | 0      | 1      | 0      |
| 3 | #NULL! | 0 | 0      | 0      | 0      | 0      |
| 2 | #NULL! | 1 | 0      | 0      | 0      | 0      |
| 1 | #NULL! | 0 | 0      | 0      | 0      | 0      |
| 2 | #NULL! | 0 | 0      | 1      | 0      | 0      |
| 1 | #NULL! | 0 | 0      | 0      | 0      | 0      |
| 1 | #NULL! | 0 | 0      | 0      | 0      | 0      |
| 1 | #NULL! | 0 | 0      | 0      | 0      | 0      |
| 1 | #NULL! | 0 | 0      | 0      | 0      | 0      |
| 1 | #NULL! | 0 | 0      | 1      | 1      | 0      |
| 1 | #NULL! | 0 | 0      | 0      | 0      | 0      |
| 1 | #NULL! | 0 | #NULL! | #NULL! | #NULL! | #NULL! |
| 2 | #NULL! | 1 | 0      | 1      | 1      | 0      |
| 2 | #NULL! | 0 | 0      | 1      | 1      | 1      |
| 2 | #NULL! | 1 | 0      | 0      | 0      | 0      |
| 1 | #NULL! | 0 | 0      | 0      | 0      | 0      |

| ace_home_pre | ace_neighbor_pre | ace_econ_pre | language_pre__1 | language_pre__2 | language_pre__3 |
|--------------|------------------|--------------|-----------------|-----------------|-----------------|
| 0            | 0                | 0            | 0               | 1               | 0               |
| 0            | 0                | 0            | 0               | 1               | 0               |
| 0            | 0                | 0            | 1               | 1               | 0               |
| 99           | 0                | 1            | 1               | 0               | 0               |
| 0            | 0                | 0            | 1               | 0               | 0               |
| 99           | 99               | 99           | 0               | 1               | 0               |
| 0            | 1                | 0            | 1               | 1               | 0               |
| 1            | 0                | 0            | 1               | 1               | 0               |
| 0            | 0                | 0            | 0               | 1               | 0               |
| 1            | 0                | 0            | 1               | 0               | 0               |
| 1            | 1                | 0            | 1               | 0               | 0               |
| 1            | 0                | 0            | 1               | 0               | 0               |
| 0            | 0                | 1            | 1               | 0               | 0               |
| 0            | 0                | 0            | 1               | 0               | 0               |
| 0            | 0                | 0            | 1               | 0               | 0               |
| 0            | 0                | 0            | 0               | 1               | 0               |
| 0            | 0                | 0            | 1               | 1               | 0               |
| 1            | 0                | 0            | 1               | 0               | 0               |
| 99           | 99               | 99           | 1               | 0               | 0               |
| 1            | 1                | 1            | 1               | 0               | 0               |
| 0            | 0                | 99           | 1               | 1               | 0               |
| 99           | 99               | 99           | 0               | 0               | 0               |
| 99           | 99               | 99           | 0               | 1               | 0               |
| 0            | 1                | 0            | 1               | 1               | 0               |
| 0            | 0                | 0            | 1               | 1               | 0               |
| 0            | 0                | 0            | 1               | 1               | 0               |
| 0            | 0                | 0            | 1               | 1               | 0               |
| 0            | 0                | 1            | 1               | 0               | 0               |
| 0            | 0                | 0            | 1               | 1               | 0               |
| 1            | 0                | 1            | 1               | 1               | 0               |
| 0            | 0                | 1            | 0               | 0               | 0               |
| 0            | 0                | 0            | 1               | 0               | 0               |
| 0            | 1                | 1            | 1               | 1               | 0               |
| 0            | 0                | 0            | 1               | 1               | 0               |
| 99           | 0                | 0            | 1               | 1               | 0               |
| 0            | 0                | 1            | 1               | 1               | 0               |
| 1            | 0                | 0            | 0               | 1               | 0               |
| 0            | 0                | 0            | 1               | 1               | 0               |
| 1            | 0                | 1            | 1               | 0               | 0               |
| 0            | 0                | 0            | 1               | 0               | 0               |
| 0            | 1                | 99           | 1               | 1               | 0               |
| 0            | 1                | 0            | 1               | 0               | 0               |
| 0            | 0                | 0            | 1               | 0               | 0               |
| 0            | 0                | 1            | 1               | 0               | 0               |
| 0            | 0                | 0            | 1               | 0               | 0               |
| 0            | 1                | 0            | 1               | 0               | 0               |
| 0            | 0                | 0            | 1               | 0               | 0               |

|   |    |   |   |   |   |
|---|----|---|---|---|---|
| 0 | 0  | 0 | 1 | 1 | 0 |
| 0 | 0  | 0 | 1 | 0 | 0 |
| 0 | 0  | 0 | 1 | 1 | 0 |
| 0 | 0  | 0 | 1 | 0 | 0 |
| 0 | 0  | 0 | 0 | 1 | 0 |
| 0 | 0  | 1 | 1 | 0 | 0 |
| 0 | 0  | 0 | 1 | 0 | 0 |
| 1 | 1  | 0 | 1 | 1 | 0 |
| 0 | 0  | 1 | 0 | 1 | 0 |
| 0 | 0  | 0 | 1 | 0 | 0 |
| 0 | 0  | 0 | 0 | 1 | 0 |
| 1 | 0  | 0 | 1 | 1 | 0 |
| 1 | 0  | 1 | 1 | 0 | 0 |
| 0 | 99 | 0 | 1 | 0 | 0 |
| 1 | 0  | 1 | 1 | 0 | 0 |
| 0 | 1  | 1 | 1 | 0 | 0 |
| 1 | 0  | 0 | 1 | 1 | 0 |
| 1 | 0  | 1 | 1 | 0 | 0 |
| 0 | 0  | 0 | 1 | 0 | 0 |
| 0 | 0  | 0 | 1 | 1 | 0 |
| 0 | 0  | 0 | 1 | 1 | 0 |
| 0 | 0  | 0 | 1 | 0 | 0 |
| 1 | 0  | 0 | 1 | 1 | 0 |
| 0 | 0  | 0 | 1 | 0 | 0 |
| 0 | 0  | 0 | 1 | 1 | 0 |
| 0 | 0  | 0 | 1 | 1 | 0 |
| 0 | 0  | 0 | 1 | 0 | 0 |
| 0 | 0  | 0 | 1 | 1 | 0 |
| 0 | 0  | 0 | 1 | 1 | 0 |
| 0 | 0  | 0 | 1 | 0 | 0 |
| 0 | 0  | 0 | 1 | 1 | 0 |
| 0 | 0  | 0 | 1 | 1 | 0 |
| 0 | 0  | 0 | 1 | 1 | 0 |
| 0 | 0  | 0 | 1 | 1 | 0 |
| 0 | 0  | 0 | 1 | 0 | 0 |
| 0 | 0  | 0 | 1 | 1 | 0 |
| 0 | 0  | 0 | 1 | 1 | 0 |
| 0 | 0  | 0 | 1 | 1 | 0 |
| 0 | 0  | 1 | 0 | 1 | 0 |
| 0 | 0  | 0 | 1 | 1 | 0 |
| 0 | 0  | 0 | 1 | 1 | 0 |
| 0 | 0  | 0 | 1 | 1 | 0 |
| 0 | 0  | 0 | 1 | 1 | 0 |
| 1 | 99 | 0 | 1 | 1 | 0 |
| 0 | 0  | 0 | 1 | 1 | 0 |
| 0 | 0  | 0 | 1 | 1 | 0 |
| 0 | 1  | 0 | 1 | 0 | 0 |
| 0 | 0  | 0 | 1 | 0 | 0 |
| 1 | 99 | 0 | 1 | 1 | 0 |

|   |   |   |   |   |   |
|---|---|---|---|---|---|
| 0 | 1 | 1 | 1 | 0 | 0 |
| 1 | 1 | 0 | 0 | 1 | 0 |
| 0 | 0 | 0 | 0 | 1 | 0 |
| 0 | 0 | 0 | 1 | 0 | 1 |
| 0 | 0 | 0 | 0 | 1 | 0 |
| 0 | 0 | 0 | 0 | 1 | 0 |
| 0 | 0 | 0 | 0 | 0 | 0 |
| 0 | 0 | 0 | 0 | 1 | 0 |
| 1 | 1 | 1 | 1 | 1 | 0 |
| 0 | 0 | 0 | 0 | 0 | 0 |
| 0 | 1 | 1 | 1 | 0 | 0 |
| 0 | 1 | 1 | 0 | 0 | 0 |
| 0 | 0 | 0 | 0 | 1 | 0 |
| 0 | 0 | 0 | 0 | 1 | 0 |
| 0 | 0 | 0 | 0 | 1 | 0 |
| 0 | 0 | 0 | 0 | 1 | 0 |
| 0 | 0 | 0 | 0 | 1 | 0 |
| 0 | 0 | 0 | 0 | 1 | 0 |
| 1 | 0 | 0 | 1 | 1 | 0 |
| 0 | 0 | 0 | 0 | 1 | 0 |
| 0 | 0 | 0 | 0 | 1 | 0 |
| 1 | 0 | 0 | 0 | 1 | 0 |
| 1 | 0 | 0 | 0 | 0 | 0 |
| 1 | 1 | 1 | 1 | 0 | 0 |
| 1 | 0 | 1 | 1 | 0 | 0 |
| 0 | 0 | 0 | 0 | 1 | 0 |
| 0 | 1 | 0 | 0 | 1 | 0 |
| 1 | 0 | 0 | 0 | 1 | 0 |
| 0 | 0 | 0 | 0 | 1 | 0 |
| 0 | 0 | 0 | 0 | 1 | 0 |
| 0 | 0 | 0 | 0 | 1 | 0 |
| 0 | 0 | 0 | 0 | 1 | 0 |
| 0 | 0 | 0 | 0 | 1 | 0 |
| 0 | 0 | 0 | 0 | 1 | 0 |
| 0 | 0 | 0 | 0 | 1 | 0 |
| 0 | 0 | 0 | 0 | 1 | 0 |
| 0 | 0 | 0 | 0 | 1 | 0 |
| 0 | 0 | 0 | 0 | 1 | 0 |
| 0 | 0 | 0 | 0 | 1 | 0 |
| 0 | 0 | 0 | 0 | 1 | 0 |
| 0 | 0 | 0 | 0 | 1 | 0 |
| 0 | 1 | 0 | 0 | 1 | 0 |
| 0 | 0 | 0 | 0 | 0 | 0 |
| 0 | 0 | 0 | 0 | 0 | 0 |
| 0 | 0 | 0 | 0 | 0 | 0 |
| 1 | 1 | 1 | 1 | 0 | 0 |
| 1 | 1 | 0 | 0 | 1 | 0 |

99



|    |    |    |   |   |   |
|----|----|----|---|---|---|
| 99 | 99 | 99 | 1 | 0 | 0 |
| 0  | 0  | 0  | 1 | 1 | 0 |
| 1  | 0  | 1  | 1 | 0 | 0 |
| 0  | 0  | 1  | 1 | 0 | 0 |
| 0  | 0  | 1  | 1 | 0 | 0 |
| 0  | 1  | 0  | 1 | 0 | 0 |
| 99 | 0  | 0  | 0 | 1 | 0 |
| 0  | 0  | 0  | 1 | 1 | 0 |
| 0  | 0  | 0  | 0 | 1 | 0 |
| 0  | 0  | 0  | 1 | 0 | 0 |
| 0  | 0  | 0  | 1 | 1 | 0 |
| 0  | 0  | 0  | 0 | 0 | 0 |
| 0  | 0  | 0  | 1 | 1 | 0 |
| 0  | 0  | 0  | 1 | 0 | 0 |
| 0  | 0  | 1  | 0 | 1 | 0 |
| 0  | 0  | 0  | 1 | 1 | 0 |
| 1  | 1  | 0  | 1 | 0 | 0 |
| 0  | 0  | 0  | 1 | 1 | 0 |
| 0  | 0  | 0  | 0 | 1 | 0 |
| 0  | 0  | 0  | 0 | 1 | 0 |
| 0  | 0  | 0  | 0 | 1 | 0 |
| 0  | 0  | 1  | 0 | 1 | 0 |
| 0  | 99 | 0  | 1 | 1 | 0 |
| 0  | 0  | 0  | 1 | 0 | 0 |
| 1  | 1  | 1  | 1 | 0 | 0 |
| 0  | 0  | 0  | 1 | 1 | 0 |
| 0  | 0  | 0  | 1 | 0 | 0 |
| 0  | 0  | 0  | 1 | 0 | 0 |
| 1  | 0  | 0  | 1 | 0 | 0 |
| 0  | 0  | 0  | 1 | 0 | 0 |
| 0  | 0  | 0  | 1 | 0 | 0 |
| 0  | 0  | 0  | 1 | 0 | 0 |
| 0  | 0  | 0  | 1 | 0 | 0 |
| 0  | 0  | 0  | 1 | 0 | 0 |
| 0  | 0  | 0  | 0 | 1 | 0 |
| 0  | 0  | 0  | 1 | 0 | 0 |
| 1  | 1  | 1  | 1 | 1 | 0 |
| 0  | 0  | 0  | 1 | 1 | 0 |
| 1  | 1  | 0  | 1 | 0 | 0 |
| 0  | 0  | 0  | 1 | 0 | 0 |
| 1  | 0  | 0  | 1 | 0 | 0 |
| 0  | 0  | 0  | 1 | 1 | 0 |
| 0  | 0  | 0  | 1 | 0 | 0 |
| 0  | 0  | 0  | 1 | 0 | 0 |
| 0  | 0  | 0  | 1 | 0 | 0 |
| 0  | 0  | 99 | 1 | 1 | 0 |
| 0  | 0  | 1  | 1 | 0 | 0 |
| 0  | 0  | 0  | 1 | 0 | 0 |
| 0  | 0  | 1  | 1 | 0 | 0 |
| 0  | 0  | 0  | 1 | 0 | 0 |
| 1  | 1  | 1  | 1 | 0 | 0 |
| 0  | 0  | 0  | 1 | 0 | 0 |
| 0  | 0  | 1  | 1 | 0 | 0 |

|   |   |    |   |   |   |
|---|---|----|---|---|---|
| 1 | 0 | 99 | 1 | 1 | 0 |
| 0 | 0 | 1  | 1 | 0 | 0 |
| 0 | 1 | 99 | 1 | 0 | 0 |
| 0 | 0 | 0  | 1 | 1 | 0 |
| 1 | 1 | 0  | 1 | 0 | 0 |
| 0 | 1 | 0  | 1 | 0 | 0 |
| 0 | 0 | 0  | 1 | 0 | 0 |
| 1 | 1 | 0  | 1 | 0 | 0 |
| 0 | 0 | 0  | 0 | 1 | 0 |
| 0 | 0 | 0  | 1 | 0 | 0 |
| 0 | 0 | 0  | 1 | 1 | 0 |
| 1 | 0 | 1  | 1 | 0 | 0 |
| 1 | 0 | 0  | 1 | 0 | 0 |
| 0 | 0 | 1  | 1 | 1 | 0 |
| 1 | 0 | 0  | 1 | 0 | 0 |
| 1 | 0 | 1  | 1 | 0 | 0 |
| 0 | 0 | 0  | 1 | 0 | 0 |
| 1 | 1 | 1  | 1 | 0 | 0 |
| 0 | 0 | 0  | 1 | 0 | 0 |
| 1 | 0 | 1  | 1 | 0 | 0 |
| 1 | 0 | 0  | 1 | 1 | 0 |
| 0 | 1 | 0  | 0 | 1 | 0 |
| 1 | 1 | 0  | 1 | 1 | 0 |
| 0 | 0 | 0  | 1 | 1 | 0 |
| 0 | 0 | 0  | 1 | 1 | 0 |
| 0 | 0 | 0  | 1 | 1 | 0 |
| 0 | 0 | 99 | 1 | 1 | 0 |
| 0 | 0 | 0  | 1 | 0 | 0 |
| 1 | 1 | 1  | 1 | 1 | 0 |
| 0 | 0 | 0  | 1 | 1 | 0 |
| 0 | 0 | 0  | 0 | 1 | 0 |
| 0 | 0 | 0  | 0 | 1 | 0 |
| 0 | 0 | 1  | 0 | 1 | 0 |
| 1 | 1 | 99 | 1 | 0 | 0 |
| 0 | 1 | 0  | 1 | 0 | 0 |
| 0 | 0 | 0  | 1 | 0 | 0 |
| 1 | 0 | 0  | 1 | 1 | 0 |
| 0 | 1 | 0  | 1 | 0 | 0 |
| 0 | 0 | 0  | 1 | 0 | 0 |
| 0 | 0 | 0  | 1 | 0 | 0 |
| 0 | 0 | 0  | 1 | 1 | 0 |

|    |    |    |   |   |   |
|----|----|----|---|---|---|
| 0  | 0  | 1  | 1 | 0 | 0 |
| 0  | 0  | 0  | 1 | 1 | 0 |
| 0  | 0  | 0  | 1 | 0 | 0 |
| 0  | 1  | 0  | 1 | 1 | 0 |
| 1  | 0  | 1  | 1 | 0 | 0 |
| 0  | 0  | 0  | 1 | 1 | 0 |
| 0  | 1  | 1  | 1 | 0 | 0 |
| 1  | 0  | 1  | 1 | 1 | 0 |
| 0  | 1  | 1  | 1 | 0 | 0 |
| 0  | 0  | 0  | 1 | 1 | 0 |
| 0  | 0  | 0  | 0 | 0 | 0 |
| 0  | 0  | 0  | 1 | 1 | 0 |
| 1  | 0  | 0  | 1 | 1 | 0 |
| 1  | 0  | 0  | 1 | 1 | 0 |
| 0  | 0  | 0  | 0 | 1 | 0 |
| 1  | 1  | 1  | 1 | 0 | 0 |
| 1  | 1  | 0  | 1 | 1 | 0 |
| 1  | 1  | 1  | 1 | 0 | 0 |
| 0  | 1  | 0  | 1 | 0 | 0 |
| 0  | 0  | 0  | 1 | 1 | 0 |
| 99 | 99 | 99 | 1 | 0 | 0 |
| 0  | 0  | 0  | 0 | 1 | 0 |
| 0  | 1  | 1  | 1 | 0 | 0 |
| 0  | 0  | 1  | 1 | 0 | 0 |
| 0  | 0  | 1  | 1 | 0 | 0 |
| 0  | 0  | 0  | 1 | 0 | 0 |
| 0  | 0  | 0  | 1 | 1 | 0 |
| 1  | 0  | 1  | 1 | 0 | 0 |
| 0  | 0  | 1  | 1 | 1 | 0 |
| 0  | 0  | 0  | 1 | 1 | 0 |
| 0  | 0  | 0  | 0 | 1 | 0 |
| 0  | 0  | 0  | 1 | 1 | 0 |
| 0  | 0  | 0  | 1 | 1 | 0 |
| 0  | 1  | 0  | 0 | 1 | 0 |
| 1  | 0  | 0  | 1 | 1 | 0 |
| 0  | 0  | 0  | 1 | 1 | 0 |
| 0  | 0  | 0  | 0 | 0 | 0 |
| 0  | 0  | 0  | 1 | 1 | 0 |
| 0  | 0  | 0  | 1 | 0 | 0 |
| 0  | 0  | 0  | 1 | 1 | 0 |
| 1  | 0  | 1  | 1 | 1 | 0 |
| 1  | 1  | 0  | 0 | 1 | 0 |
| 0  | 0  | 0  | 1 | 1 | 0 |
| 1  | 0  | 0  | 1 | 1 | 0 |
| 0  | 0  | 0  | 0 | 1 | 0 |
| 0  | 0  | 0  | 0 | 1 | 0 |
| 1  | 0  | 1  | 0 | 1 | 0 |
| 0  | 0  | 0  | 1 | 0 | 0 |
| 1  | 0  | 0  | 1 | 1 | 0 |
| 0  | 0  | 0  | 1 | 1 | 0 |
| 1  | 1  | 0  | 1 | 1 | 0 |

|   |   |   |   |   |   |
|---|---|---|---|---|---|
| 0 | 0 | 0 | 0 | 1 | 0 |
| 0 | 0 | 0 | 1 | 0 | 0 |
| 1 | 0 | 0 | 1 | 0 | 0 |
| 0 | 0 | 1 | 1 | 1 | 0 |
| 0 | 0 | 0 | 1 | 0 | 0 |
| 0 | 0 | 0 | 0 | 1 | 0 |
| 0 | 0 | 1 | 1 | 0 | 0 |
| 0 | 0 | 0 | 1 | 0 | 0 |
| 0 | 0 | 1 | 1 | 1 | 0 |
| 0 | 0 | 0 | 0 | 1 | 0 |
| 0 | 0 | 0 | 1 | 1 | 0 |
| 0 | 0 | 0 | 0 | 1 | 0 |
| 0 | 0 | 0 | 1 | 1 | 0 |
| 0 | 0 | 0 | 1 | 0 | 0 |
| 0 | 1 | 0 | 1 | 1 | 0 |
| 1 | 1 | 1 | 1 | 0 | 0 |
| 0 | 0 | 0 | 1 | 0 | 0 |
| 0 | 0 | 0 | 1 | 1 | 0 |
| 1 | 0 | 0 | 0 | 1 | 0 |
| 0 | 0 | 0 | 1 | 0 | 0 |
| 0 | 0 | 0 | 1 | 0 | 0 |
| 0 | 0 | 0 | 1 | 0 | 0 |
| 1 | 0 | 1 | 1 | 0 | 0 |
| 0 | 0 | 0 | 1 | 1 | 0 |
| 0 | 0 | 0 | 0 | 1 | 0 |
| 0 | 0 | 0 | 0 | 0 | 0 |
| 0 | 0 | 0 | 0 | 1 | 0 |
| 1 | 0 | 0 | 1 | 0 | 0 |
| 0 | 0 | 0 | 0 | 1 | 0 |
| 0 | 0 | 0 | 0 | 1 | 0 |
| 0 | 0 | 0 | 0 | 0 | 0 |
| 1 | 0 | 0 | 1 | 1 | 0 |
| 0 | 0 | 0 | 0 | 1 | 0 |
| 0 | 0 | 0 | 0 | 1 | 0 |
| 0 | 0 | 0 | 0 | 1 | 0 |
| 0 | 0 | 0 | 0 | 1 | 0 |
| 0 | 0 | 0 | 0 | 1 | 0 |
| 0 | 0 | 0 | 0 | 1 | 0 |
| 0 | 0 | 0 | 0 | 1 | 0 |
| 0 | 0 | 0 | 0 | 1 | 0 |
| 1 | 0 | 1 | 1 | 1 | 0 |
| 0 | 0 | 0 | 1 | 0 | 0 |
| 0 | 0 | 0 | 1 | 1 | 0 |
| 0 | 0 | 1 | 1 | 1 | 0 |
| 0 | 0 | 0 | 1 | 1 | 0 |

|   |   |    |   |   |   |
|---|---|----|---|---|---|
| 0 | 0 | 0  | 1 | 1 | 0 |
| 0 | 0 | 0  | 1 | 1 | 0 |
| 0 | 0 | 0  | 0 | 0 | 0 |
| 1 | 1 | 0  | 1 | 0 | 0 |
| 0 | 0 | 0  | 0 | 1 | 0 |
| 0 | 0 | 99 | 0 | 1 | 0 |
| 1 | 0 | 0  | 1 | 1 | 0 |
| 1 | 0 | 0  | 1 | 0 | 0 |
| 0 | 0 | 0  | 1 | 0 | 0 |
| 0 | 0 | 0  | 1 | 1 | 0 |
| 0 | 0 | 1  | 0 | 1 | 0 |
| 0 | 0 | 0  | 0 | 1 | 0 |
| 1 | 1 | 1  | 1 | 0 | 0 |
| 1 | 0 | 0  | 1 | 0 | 0 |
| 0 | 0 | 0  | 1 | 1 | 0 |
| 0 | 0 | 0  | 1 | 1 | 0 |
| 0 | 0 | 0  | 0 | 1 | 0 |
| 0 | 0 | 0  | 1 | 1 | 0 |
| 0 | 0 | 0  | 0 | 1 | 0 |
| 0 | 0 | 0  | 1 | 1 | 0 |
| 0 | 0 | 0  | 0 | 1 | 0 |
| 0 | 0 | 0  | 1 | 1 | 0 |
| 0 | 0 | 0  | 0 | 1 | 0 |
| 0 | 0 | 0  | 1 | 1 | 0 |
| 0 | 0 | 0  | 0 | 1 | 0 |
| 0 | 0 | 0  | 1 | 1 | 0 |
| 0 | 0 | 0  | 1 | 1 | 0 |
| 0 | 0 | 0  | 1 | 0 | 0 |
| 0 | 0 | 0  | 1 | 0 | 0 |
| 0 | 0 | 0  | 1 | 1 | 0 |
| 0 | 0 | 0  | 1 | 0 | 0 |
| 0 | 0 | 0  | 1 | 0 | 0 |
| 0 | 0 | 0  | 1 | 1 | 0 |
| 0 | 0 | 0  | 1 | 0 | 0 |
| 0 | 0 | 0  | 1 | 1 | 0 |
| 0 | 0 | 0  | 1 | 0 | 0 |
| 0 | 0 | 0  | 1 | 1 | 0 |
| 0 | 0 | 0  | 1 | 0 | 0 |
| 0 | 0 | 0  | 1 | 1 | 0 |
| 0 | 0 | 0  | 1 | 0 | 0 |
| 0 | 0 | 0  | 1 | 1 | 0 |
| 0 | 0 | 0  | 1 | 0 | 0 |
| 0 | 0 | 0  | 1 | 1 | 0 |
| 0 | 0 | 0  | 1 | 0 | 0 |
| 1 | 1 | 1  | 1 | 0 | 0 |
| 0 | 1 | 1  | 1 | 1 | 0 |
| 0 | 0 | 0  | 1 | 0 | 0 |
| 0 | 1 | 0  | 1 | 0 | 1 |
| 0 | 0 | 0  | 1 | 0 | 0 |
| 0 | 0 | 0  | 0 | 1 | 0 |

|    |    |    |   |   |   |
|----|----|----|---|---|---|
| 0  | 0  | 0  | 1 | 0 | 0 |
| 0  | 0  | 0  | 1 | 1 | 0 |
| 0  | 0  | 0  | 1 | 0 | 0 |
| 0  | 1  | 0  | 1 | 1 | 0 |
| 1  | 0  | 0  | 1 | 0 | 0 |
| 0  | 1  | 99 | 1 | 0 | 0 |
| 0  | 0  | 0  | 1 | 0 | 0 |
| 1  | 1  | 0  | 1 | 0 | 0 |
| 1  | 0  | 1  | 0 | 1 | 0 |
| 0  | 1  | 1  | 1 | 0 | 0 |
| 0  | 1  | 0  | 1 | 0 | 0 |
| 1  | 0  | 0  | 1 | 0 | 0 |
| 0  | 0  | 0  | 0 | 1 | 0 |
| 0  | 0  | 0  | 1 | 1 | 0 |
| 0  | 0  | 0  | 1 | 0 | 0 |
| 0  | 0  | 0  | 1 | 0 | 0 |
| 1  | 1  | 1  | 1 | 0 | 0 |
| 0  | 0  | 0  | 1 | 0 | 0 |
| 0  | 0  | 0  | 1 | 1 | 0 |
| 1  | 0  | 1  | 1 | 0 | 0 |
| 0  | 1  | 0  | 1 | 1 | 0 |
| 1  | 0  | 0  | 0 | 0 | 0 |
| 1  | 0  | 0  | 0 | 1 | 0 |
| 99 | 99 | 99 | 0 | 1 | 1 |
| 0  | 0  | 0  | 1 | 0 | 0 |
| 1  | 0  | 0  | 1 | 0 | 0 |
| 0  | 1  | 0  | 1 | 1 | 0 |
| 0  | 0  | 0  | 1 | 0 | 0 |
| 0  | 0  | 0  | 0 | 1 | 0 |
| 99 | 99 | 99 | 0 | 1 | 0 |
| 0  | 1  | 0  | 1 | 1 | 0 |
| 0  | 0  | 0  | 1 | 1 | 0 |
| 0  | 1  | 0  | 1 | 0 | 0 |
| 1  | 0  | 0  | 1 | 1 | 0 |
| 0  | 0  | 0  | 0 | 1 | 0 |
| 0  | 0  | 0  | 0 | 1 | 0 |
| 0  | 0  | 1  | 1 | 0 | 0 |
| 0  | 1  | 99 | 1 | 0 | 0 |
| 0  | 1  | 0  | 0 | 1 | 0 |
| 0  | 0  | 0  | 1 | 1 | 0 |
| 0  | 0  | 0  | 1 | 0 | 0 |
| 0  | 0  | 0  | 0 | 1 | 0 |
| 0  | 0  | 0  | 0 | 1 | 0 |
| 99 | 99 | 99 | 1 | 0 | 0 |
| 1  | 0  | 1  | 1 | 0 | 0 |
| 0  | 0  | 0  | 1 | 1 | 0 |
| 0  | 0  | 0  | 1 | 0 | 0 |
| 0  | 1  | 1  | 1 | 1 | 0 |

|   |   |   |   |   |   |
|---|---|---|---|---|---|
| 0 | 1 | 0 | 1 | 1 | 0 |
| 0 | 0 | 0 | 1 | 0 | 0 |
| 0 | 0 | 0 | 0 | 1 | 0 |
| 0 | 0 | 1 | 0 | 1 | 0 |
| 0 | 0 | 0 | 1 | 1 | 0 |
| 1 | 0 | 0 | 1 | 1 | 0 |
| 0 | 0 | 0 | 1 | 0 | 0 |
| 0 | 0 | 0 | 1 | 1 | 0 |
| 1 | 1 | 1 | 1 | 0 | 0 |
| 0 | 0 | 0 | 1 | 1 | 0 |
| 0 | 0 | 1 | 1 | 0 | 0 |
| 0 | 0 | 0 | 1 | 1 | 0 |
| 1 | 0 | 0 | 1 | 1 | 0 |
| 0 | 1 | 0 | 1 | 1 | 0 |
| 0 | 0 | 0 | 1 | 0 | 0 |
| 0 | 0 | 0 | 1 | 1 | 0 |
| 0 | 0 | 0 | 1 | 0 | 0 |
| 0 | 0 | 0 | 1 | 1 | 0 |
| 0 | 0 | 0 | 1 | 0 | 0 |
| 0 | 0 | 0 | 1 | 1 | 0 |
| 0 | 0 | 0 | 1 | 0 | 0 |
| 0 | 0 | 0 | 1 | 1 | 0 |
| 1 | 1 | 1 | 1 | 1 | 0 |
| 0 | 0 | 0 | 1 | 0 | 0 |
| 0 | 1 | 0 | 0 | 1 | 0 |
| 1 | 1 | 1 | 1 | 0 | 0 |
| 0 | 0 | 0 | 0 | 1 | 0 |
| 1 | 0 | 0 | 1 | 0 | 0 |
| 1 | 0 | 1 | 1 | 1 | 0 |
| 0 | 0 | 0 | 0 | 1 | 0 |
| 1 | 0 | 0 | 1 | 1 | 0 |
| 0 | 0 | 0 | 1 | 1 | 0 |
| 0 | 0 | 0 | 1 | 1 | 0 |
| 0 | 0 | 0 | 1 | 1 | 0 |
| 0 | 0 | 0 | 1 | 1 | 0 |
| 0 | 0 | 0 | 1 | 1 | 0 |
| 0 | 0 | 0 | 1 | 1 | 0 |
| 1 | 0 | 1 | 1 | 0 | 0 |
| 0 | 0 | 0 | 1 | 0 | 0 |
| 0 | 0 | 0 | 1 | 1 | 0 |
| 0 | 0 | 0 | 0 | 1 | 0 |
| 0 | 0 | 0 | 1 | 1 | 0 |
| 1 | 0 | 1 | 1 | 0 | 0 |
| 0 | 0 | 0 | 1 | 0 | 0 |
| 0 | 0 | 0 | 1 | 1 | 0 |
| 0 | 0 | 0 | 1 | 1 | 0 |
| 1 | 1 | 0 | 1 | 1 | 0 |

|    |    |    |   |   |   |
|----|----|----|---|---|---|
| 1  | 0  | 0  | 0 | 1 | 0 |
| 0  | 0  | 0  | 1 | 0 | 0 |
| 0  | 0  | 0  | 1 | 1 | 0 |
| 0  | 0  | 0  | 0 | 1 | 0 |
| 1  | 1  | 1  | 1 | 0 | 0 |
| 0  | 0  | 1  | 1 | 0 | 0 |
| 0  | 0  | 0  | 1 | 0 | 0 |
| 1  | 1  | 0  | 0 | 1 | 0 |
| 1  | 0  | 1  | 1 | 0 | 0 |
| 0  | 0  | 0  | 1 | 0 | 0 |
| 0  | 0  | 0  | 1 | 0 | 0 |
| 0  | 0  | 1  | 1 | 0 | 0 |
| 0  | 0  | 0  | 1 | 1 | 0 |
| 0  | 0  | 0  | 0 | 0 | 0 |
| 0  | 0  | 0  | 1 | 1 | 0 |
| 0  | 0  | 0  | 0 | 1 | 0 |
| 0  | 0  | 0  | 1 | 1 | 0 |
| 0  | 0  | 0  | 0 | 1 | 0 |
| 0  | 0  | 0  | 0 | 1 | 0 |
| 0  | 0  | 0  | 0 | 1 | 0 |
| 1  | 0  | 0  | 1 | 1 | 0 |
| 1  | 0  | 0  | 1 | 1 | 0 |
| 0  | 0  | 0  | 1 | 1 | 0 |
| 0  | 0  | 0  | 1 | 0 | 0 |
| 0  | 0  | 0  | 1 | 1 | 0 |
| 1  | 0  | 0  | 1 | 1 | 0 |
| 99 | 99 | 99 | 1 | 1 | 0 |
| 99 | 0  | 0  | 1 | 0 | 0 |
| 0  | 0  | 0  | 1 | 0 | 0 |
| 0  | 0  | 0  | 0 | 1 | 0 |
| 0  | 0  | 1  | 1 | 0 | 0 |
| 1  | 1  | 0  | 1 | 0 | 0 |
| 0  | 0  | 0  | 1 | 0 | 0 |
| 1  | 1  | 0  | 0 | 1 | 0 |
| 0  | 0  | 1  | 0 | 1 | 0 |
| 0  | 0  | 0  | 0 | 1 | 0 |
| 0  | 0  | 0  | 0 | 1 | 0 |
| 0  | 0  | 0  | 0 | 1 | 0 |
| 0  | 0  | 0  | 0 | 1 | 0 |
| 0  | 1  | 0  | 1 | 0 | 0 |
| 0  | 0  | 0  | 0 | 1 | 0 |
| 0  | 0  | 0  | 0 | 1 | 0 |
| 0  | 0  | 0  | 0 | 1 | 0 |
| 1  | 1  | 1  | 1 | 0 | 0 |
| 0  | 0  | 0  | 0 | 0 | 0 |
| 0  | 0  | 0  | 0 | 1 | 0 |
| 0  | 0  | 0  | 0 | 1 | 0 |



|   |    |    |   |   |   |
|---|----|----|---|---|---|
| 0 | 0  | 0  | 1 | 1 | 0 |
| 0 | 0  | 0  | 1 | 1 | 0 |
| 0 | 0  | 0  | 1 | 1 | 0 |
| 0 | 0  | 0  | 1 | 0 | 0 |
| 1 | 1  | 1  | 1 | 0 | 0 |
| 0 | 0  | 0  | 1 | 0 | 0 |
| 0 | 0  | 0  | 1 | 0 | 0 |
| 0 | 0  | 0  | 1 | 1 | 0 |
| 0 | 0  | 0  | 1 | 0 | 0 |
| 0 | 0  | 0  | 1 | 0 | 0 |
| 0 | 0  | 1  | 0 | 1 | 0 |
| 0 | 0  | 0  | 0 | 1 | 0 |
| 1 | 0  | 0  | 1 | 0 | 0 |
| 0 | 0  | 0  | 1 | 0 | 0 |
| 1 | 0  | 1  | 1 | 1 | 0 |
| 0 | 0  | 0  | 0 | 1 | 0 |
| 0 | 0  | 0  | 0 | 1 | 0 |
| 0 | 0  | 0  | 1 | 0 | 0 |
| 0 | 0  | 0  | 1 | 0 | 0 |
| 0 | 0  | 0  | 1 | 1 | 0 |
| 0 | 0  | 0  | 1 | 0 | 0 |
| 0 | 0  | 0  | 1 | 1 | 0 |
| 0 | 0  | 0  | 1 | 1 | 0 |
| 0 | 0  | 0  | 1 | 0 | 0 |
| 0 | 0  | 0  | 1 | 1 | 0 |
| 0 | 0  | 0  | 1 | 1 | 0 |
| 0 | 0  | 0  | 1 | 0 | 0 |
| 1 | 1  | 1  | 1 | 0 | 0 |
| 0 | 0  | 0  | 1 | 1 | 0 |
| 0 | 1  | 1  | 1 | 1 | 0 |
| 0 | 0  | 0  | 1 | 1 | 0 |
| 0 | 0  | 0  | 1 | 1 | 0 |
| 0 | 0  | 0  | 1 | 0 | 0 |
| 0 | 0  | 1  | 1 | 1 | 0 |
| 0 | 0  | 0  | 1 | 1 | 0 |
| 0 | 0  | 0  | 1 | 0 | 0 |
| 0 | 0  | 0  | 1 | 1 | 0 |
| 0 | 0  | 0  | 1 | 1 | 0 |
| 1 | 99 | 99 | 1 | 0 | 0 |
| 1 | 0  | 0  | 1 | 1 | 0 |
| 1 | 1  | 0  | 1 | 0 | 0 |
| 0 | 0  | 0  | 1 | 0 | 0 |
| 0 | 0  | 0  | 1 | 1 | 0 |
| 0 | 0  | 0  | 1 | 0 | 0 |
| 0 | 0  | 0  | 1 | 1 | 0 |
| 0 | 0  | 0  | 1 | 1 | 0 |
| 0 | 0  | 0  | 0 | 1 | 0 |
| 0 | 0  | 0  | 0 | 1 | 0 |

|   |    |    |   |   |   |
|---|----|----|---|---|---|
| 0 | 0  | 0  | 0 | 1 | 0 |
| 0 | 0  | 0  | 1 | 0 | 0 |
| 1 | 0  | 0  | 0 | 1 | 0 |
| 1 | 0  | 1  | 1 | 1 | 0 |
| 0 | 0  | 0  | 1 | 0 | 0 |
| 0 | 0  | 0  | 1 | 1 | 0 |
| 0 | 0  | 0  | 0 | 0 | 0 |
| 0 | 0  | 0  | 1 | 1 | 0 |
| 0 | 0  | 0  | 1 | 1 | 0 |
| 0 | 0  | 0  | 1 | 1 | 0 |
| 0 | 0  | 0  | 1 | 0 | 0 |
| 0 | 0  | 0  | 1 | 1 | 0 |
| 0 | 0  | 0  | 1 | 1 | 0 |
| 0 | 0  | 0  | 1 | 0 | 0 |
| 0 | 0  | 0  | 1 | 0 | 0 |
| 1 | 0  | 0  | 1 | 0 | 0 |
| 0 | 0  | 0  | 1 | 0 | 0 |
| 0 | 0  | 0  | 1 | 0 | 0 |
| 0 | 0  | 0  | 1 | 0 | 0 |
| 0 | 0  | 0  | 1 | 0 | 0 |
| 0 | 0  | 0  | 1 | 0 | 0 |
| 1 | 0  | 0  | 1 | 0 | 0 |
| 0 | 0  | 0  | 1 | 0 | 0 |
| 0 | 0  | 0  | 0 | 1 | 0 |
| 0 | 0  | 0  | 1 | 1 | 0 |
| 0 | 0  | 0  | 1 | 1 | 0 |
| 0 | 0  | 0  | 1 | 1 | 0 |
| 0 | 0  | 0  | 1 | 1 | 0 |
| 0 | 0  | 0  | 1 | 1 | 0 |
| 0 | 0  | 0  | 1 | 1 | 0 |
| 0 | 0  | 0  | 1 | 0 | 0 |
| 0 | 0  | 0  | 1 | 0 | 0 |
| 0 | 0  | 0  | 1 | 0 | 0 |
| 0 | 0  | 0  | 1 | 0 | 0 |
| 0 | 0  | 0  | 1 | 0 | 0 |
| 0 | 1  | 0  | 1 | 0 | 0 |
| 0 | 0  | 0  | 1 | 0 | 0 |
| 0 | 0  | 0  | 1 | 1 | 0 |
| 0 | 0  | 0  | 1 | 1 | 0 |
| 1 | 99 | 99 | 0 | 1 | 0 |
| 0 | 0  | 0  | 1 | 0 | 0 |
| 0 | 1  | 0  | 1 | 1 | 0 |
| 0 | 0  | 1  | 1 | 1 | 0 |
| 0 | 0  | 0  | 1 | 0 | 0 |
| 0 | 0  | 0  | 0 | 1 | 0 |
| 0 | 0  | 0  | 1 | 1 | 0 |
| 0 | 0  | 0  | 1 | 1 | 0 |
| 0 | 0  | 0  | 1 | 1 | 0 |
| 0 | 0  | 0  | 0 | 1 | 0 |
| 0 | 0  | 0  | 1 | 1 | 0 |
| 0 | 0  | 0  | 1 | 0 | 0 |
| 0 | 0  | 0  | 1 | 1 | 0 |
| 0 | 0  | 0  | 1 | 1 | 0 |
| 0 | 1  | 0  | 1 | 0 | 0 |
| 0 | 0  | 0  | 1 | 0 | 0 |
| 0 | 0  | 0  | 1 | 1 | 0 |
| 0 | 0  | 0  | 1 | 1 | 0 |

|    |    |    |   |   |   |
|----|----|----|---|---|---|
| 0  | 0  | 0  | 0 | 1 | 0 |
| 0  | 0  | 0  | 0 | 1 | 0 |
| 0  | 0  | 0  | 1 | 1 | 0 |
| 0  | 0  | 0  | 0 | 1 | 0 |
| 0  | 0  | 0  | 1 | 0 | 0 |
| 0  | 0  | 0  | 1 | 0 | 0 |
| 0  | 0  | 0  | 1 | 1 | 0 |
| 0  | 0  | 0  | 1 | 0 | 0 |
| 0  | 0  | 0  | 1 | 0 | 0 |
| 0  | 0  | 99 | 1 | 1 | 0 |
| 0  | 0  | 0  | 0 | 1 | 0 |
| 0  | 0  | 0  | 1 | 0 | 1 |
| 1  | 1  | 1  | 1 | 0 | 0 |
| 0  | 0  | 0  | 1 | 0 | 0 |
| 0  | 0  | 0  | 1 | 0 | 0 |
| 0  | 1  | 0  | 1 | 0 | 0 |
| 1  | 0  | 0  | 1 | 0 | 0 |
| 0  | 1  | 0  | 1 | 0 | 0 |
| 1  | 0  | 1  | 1 | 1 | 0 |
| 1  | 0  | 0  | 1 | 0 | 0 |
| 1  | 1  | 0  | 1 | 0 | 0 |
| 0  | 0  | 0  | 0 | 1 | 0 |
| 0  | 0  | 0  | 1 | 1 | 0 |
| 0  | 0  | 0  | 1 | 1 | 0 |
| 1  | 0  | 0  | 1 | 1 | 0 |
| 0  | 0  | 0  | 1 | 1 | 0 |
| 0  | 0  | 0  | 1 | 0 | 0 |
| 0  | 0  | 0  | 0 | 1 | 0 |
| 0  | 1  | 0  | 1 | 1 | 0 |
| 0  | 0  | 0  | 1 | 0 | 0 |
| 99 | 99 | 99 | 1 | 1 | 0 |
| 0  | 0  | 0  | 1 | 0 | 0 |
| 0  | 0  | 0  | 1 | 1 | 0 |
| 0  | 0  | 0  | 1 | 1 | 0 |
| 0  | 0  | 0  | 1 | 1 | 0 |
| 0  | 0  | 0  | 0 | 1 | 0 |
| 0  | 0  | 0  | 1 | 0 | 0 |
| 0  | 0  | 0  | 1 | 0 | 0 |
| 0  | 0  | 0  | 1 | 1 | 0 |
| 0  | 0  | 0  | 1 | 1 | 0 |
| 0  | 0  | 0  | 1 | 1 | 0 |
| 0  | 0  | 0  | 1 | 0 | 0 |
| 0  | 0  | 0  | 1 | 0 | 0 |
| 0  | 0  | 0  | 1 | 1 | 0 |
| 1  | 1  | 1  | 1 | 1 | 0 |
| 0  | 0  | 0  | 0 | 1 | 0 |
| 1  | 0  | 0  | 1 | 0 | 0 |
| 0  | 0  | 0  | 1 | 0 | 0 |
| 1  | 0  | 0  | 1 | 1 | 0 |
| 0  | 1  | 0  | 1 | 1 | 0 |
| 0  | 0  | 0  | 1 | 1 | 0 |
| 0  | 1  | 0  | 1 | 0 | 0 |

|   |   |   |   |   |   |
|---|---|---|---|---|---|
| 0 | 0 | 0 | 1 | 1 | 0 |
| 0 | 0 | 0 | 0 | 1 | 0 |
| 0 | 0 | 0 | 1 | 1 | 0 |
| 0 | 0 | 0 | 1 | 1 | 0 |
| 0 | 0 | 0 | 1 | 0 | 0 |
| 0 | 0 | 0 | 1 | 1 | 0 |
| 0 | 0 | 0 | 1 | 0 | 0 |
| 0 | 1 | 0 | 1 | 0 | 0 |
| 0 | 0 | 0 | 1 | 1 | 0 |
| 0 | 0 | 0 | 1 | 1 | 0 |
| 0 | 0 | 0 | 1 | 0 | 0 |
| 1 | 0 | 0 | 0 | 1 | 0 |
| 1 | 0 | 0 | 0 | 1 | 0 |
| 0 | 0 | 0 | 1 | 0 | 0 |
| 0 | 0 | 0 | 1 | 1 | 0 |
| 0 | 0 | 0 | 1 | 0 | 0 |
| 1 | 0 | 0 | 1 | 1 | 0 |
| 1 | 1 | 0 | 1 | 0 | 0 |
| 1 | 1 | 1 | 1 | 0 | 0 |
| 0 | 0 | 0 | 1 | 1 | 0 |
| 0 | 0 | 0 | 1 | 1 | 0 |
| 0 | 0 | 0 | 1 | 0 | 0 |
| 1 | 0 | 0 | 1 | 0 | 0 |
| 0 | 0 | 0 | 1 | 0 | 0 |
| 1 | 0 | 1 | 1 | 1 | 0 |
| 1 | 1 | 0 | 1 | 0 | 0 |
| 0 | 0 | 0 | 1 | 1 | 0 |
| 1 | 1 | 0 | 1 | 0 | 0 |
| 1 | 1 | 1 | 1 | 0 | 0 |
| 0 | 0 | 0 | 1 | 1 | 0 |
| 0 | 0 | 0 | 0 | 1 | 0 |
| 1 | 0 | 0 | 1 | 0 | 0 |
| 0 | 0 | 0 | 1 | 1 | 0 |
| 0 | 0 | 0 | 1 | 1 | 0 |
| 1 | 1 | 0 | 1 | 1 | 0 |
| 1 | 0 | 0 | 1 | 0 | 0 |
| 1 | 0 | 0 | 0 | 1 | 0 |
| 0 | 0 | 0 | 1 | 0 | 0 |
| 1 | 0 | 0 | 1 | 1 | 0 |
| 1 | 1 | 1 | 1 | 0 | 0 |
| 0 | 0 | 0 | 1 | 1 | 0 |
| 0 | 0 | 0 | 1 | 1 | 0 |
| 1 | 0 | 1 | 1 | 0 | 0 |
| 0 | 0 | 0 | 0 | 1 | 0 |
| 0 | 0 | 0 | 0 | 1 | 0 |

|    |    |    |   |   |   |
|----|----|----|---|---|---|
| 0  | 1  | 0  | 1 | 0 | 0 |
| 0  | 0  | 0  | 1 | 1 | 0 |
| 0  | 0  | 0  | 1 | 0 | 0 |
| 0  | 0  | 1  | 1 | 1 | 0 |
| 0  | 1  | 1  | 1 | 1 | 0 |
| 1  | 0  | 1  | 1 | 0 | 0 |
| 0  | 0  | 0  | 1 | 0 | 0 |
| 1  | 0  | 0  | 1 | 1 | 0 |
| 0  | 0  | 0  | 1 | 0 | 0 |
| 1  | 0  | 0  | 1 | 1 | 0 |
| 0  | 0  | 0  | 1 | 1 | 0 |
| 1  | 99 | 1  | 1 | 0 | 0 |
| 0  | 0  | 1  | 1 | 0 | 0 |
| 1  | 1  | 1  | 1 | 0 | 0 |
| 0  | 1  | 1  | 1 | 1 | 0 |
| 0  | 0  | 0  | 1 | 0 | 0 |
| 0  | 1  | 0  | 1 | 0 | 0 |
| 0  | 0  | 99 | 1 | 1 | 0 |
| 1  | 0  | 0  | 1 | 0 | 0 |
| 0  | 0  | 99 | 0 | 1 | 0 |
| 0  | 1  | 0  | 1 | 0 | 0 |
| 0  | 0  | 0  | 1 | 1 | 0 |
| 1  | 1  | 1  | 1 | 0 | 0 |
| 1  | 1  | 1  | 1 | 0 | 0 |
| 0  | 0  | 0  | 1 | 1 | 0 |
| 1  | 0  | 0  | 1 | 0 | 0 |
| 0  | 0  | 0  | 1 | 1 | 0 |
| 1  | 0  | 0  | 1 | 0 | 0 |
| 0  | 0  | 0  | 1 | 1 | 0 |
| 1  | 1  | 0  | 1 | 0 | 0 |
| 0  | 0  | 1  | 1 | 1 | 0 |
| 99 | 1  | 1  | 1 | 1 | 0 |
| 1  | 99 | 99 | 1 | 1 | 0 |
| 0  | 0  | 0  | 0 | 1 | 0 |
| 1  | 1  | 1  | 1 | 0 | 0 |
| 0  | 0  | 0  | 1 | 1 | 0 |
| 0  | 0  | 0  | 1 | 1 | 0 |
| 0  | 0  | 0  | 1 | 1 | 0 |
| 0  | 0  | 0  | 1 | 1 | 0 |
| 0  | 0  | 0  | 1 | 1 | 0 |
| 0  | 0  | 0  | 1 | 1 | 0 |
| 1  | 0  | 1  | 1 | 1 | 0 |
| 0  | 0  | 0  | 1 | 1 | 0 |
| 0  | 0  | 0  | 1 | 0 | 0 |
| 0  | 0  | 0  | 1 | 1 | 0 |
| 0  | 0  | 0  | 1 | 1 | 0 |
| 0  | 0  | 0  | 1 | 1 | 0 |
| 0  | 0  | 0  | 1 | 1 | 0 |
| 0  | 0  | 0  | 1 | 1 | 0 |
| 0  | 0  | 0  | 1 | 1 | 0 |
| 0  | 0  | 0  | 1 | 1 | 0 |
| 0  | 0  | 0  | 1 | 1 | 0 |
| 0  | 1  | 0  | 1 | 1 | 0 |

|   |    |    |   |   |   |
|---|----|----|---|---|---|
| 0 | 0  | 0  | 1 | 1 | 0 |
| 0 | 99 | 99 | 1 | 1 | 0 |
| 0 | 0  | 0  | 1 | 0 | 0 |
| 0 | 0  | 0  | 1 | 1 | 0 |
| 1 | 0  | 0  | 1 | 0 | 0 |
| 0 | 0  | 1  | 1 | 1 | 0 |
| 0 | 0  | 0  | 1 | 1 | 0 |
| 0 | 1  | 1  | 1 | 0 | 0 |
| 0 | 0  | 0  | 1 | 0 | 0 |
| 0 | 0  | 0  | 1 | 1 | 0 |
| 0 | 0  | 0  | 1 | 0 | 0 |
| 0 | 99 | 99 | 1 | 0 | 0 |
| 0 | 0  | 99 | 1 | 1 | 0 |
| 0 | 0  | 0  | 1 | 1 | 0 |
| 0 | 0  | 0  | 1 | 0 | 0 |
| 0 | 0  | 0  | 1 | 0 | 0 |
| 0 | 0  | 0  | 1 | 1 | 0 |
| 0 | 0  | 1  | 1 | 1 | 0 |
| 0 | 0  | 0  | 1 | 1 | 0 |
| 0 | 0  | 0  | 1 | 0 | 0 |
| 0 | 0  | 0  | 1 | 1 | 0 |
| 1 | 1  | 0  | 1 | 0 | 0 |
| 0 | 0  | 0  | 1 | 1 | 0 |
| 0 | 0  | 0  | 1 | 1 | 0 |
| 0 | 0  | 0  | 1 | 0 | 0 |
| 0 | 0  | 0  | 1 | 1 | 0 |
| 0 | 0  | 0  | 1 | 1 | 0 |
| 0 | 0  | 0  | 1 | 1 | 0 |
| 0 | 0  | 0  | 1 | 1 | 0 |
| 0 | 0  | 0  | 1 | 1 | 0 |
| 0 | 1  | 0  | 1 | 0 | 0 |
| 0 | 0  | 1  | 1 | 0 | 0 |
| 1 | 0  | 0  | 1 | 1 | 0 |
| 0 | 0  | 0  | 1 | 1 | 0 |
| 1 | 0  | 0  | 1 | 1 | 0 |
| 0 | 0  | 0  | 1 | 1 | 0 |
| 0 | 0  | 0  | 1 | 1 | 0 |
| 0 | 1  | 0  | 1 | 1 | 0 |
| 0 | 0  | 0  | 1 | 1 | 0 |
| 0 | 0  | 0  | 1 | 0 | 0 |
| 0 | 0  | 0  | 1 | 0 | 0 |
| 0 | 0  | 0  | 1 | 1 | 0 |
| 1 | 0  | 1  | 1 | 1 | 0 |
| 0 | 0  | 0  | 1 | 1 | 0 |
| 0 | 1  | 0  | 1 | 1 | 0 |
| 0 | 0  | 0  | 1 | 1 | 0 |
| 0 | 0  | 0  | 1 | 0 | 0 |
| 0 | 0  | 0  | 1 | 1 | 0 |
| 0 | 0  | 0  | 0 | 1 | 0 |
| 0 | 0  | 0  | 1 | 0 | 0 |

|   |    |   |   |   |   |
|---|----|---|---|---|---|
| 0 | 0  | 0 | 1 | 1 | 0 |
| 0 | 0  | 0 | 1 | 0 | 0 |
| 0 | 0  | 1 | 1 | 0 | 0 |
| 0 | 0  | 0 | 1 | 0 | 0 |
| 0 | 0  | 0 | 1 | 0 | 0 |
| 0 | 1  | 0 | 1 | 1 | 0 |
| 0 | 0  | 0 | 1 | 1 | 0 |
| 0 | 0  | 1 | 0 | 1 | 0 |
| 0 | 0  | 0 | 1 | 0 | 0 |
| 0 | 0  | 0 | 1 | 1 | 0 |
| 0 | 0  | 1 | 1 | 0 | 0 |
| 0 | 0  | 0 | 1 | 1 | 0 |
| 0 | 0  | 1 | 1 | 0 | 0 |
| 0 | 0  | 0 | 1 | 1 | 0 |
| 0 | 0  | 0 | 1 | 1 | 0 |
| 0 | 0  | 0 | 0 | 1 | 0 |
| 0 | 0  | 1 | 1 | 1 | 0 |
| 0 | 99 | 1 | 1 | 1 | 0 |
| 1 | 1  | 0 | 1 | 1 | 0 |
| 1 | 1  | 0 | 1 | 1 | 0 |
| 1 | 0  | 1 | 1 | 0 | 0 |
| 0 | 0  | 0 | 1 | 1 | 0 |
| 0 | 1  | 0 | 0 | 1 | 0 |
| 0 | 0  | 0 | 1 | 1 | 0 |
| 0 | 0  | 0 | 1 | 1 | 0 |
| 0 | 0  | 0 | 1 | 0 | 0 |
| 0 | 1  | 1 | 1 | 0 | 0 |
| 0 | 0  | 0 | 1 | 0 | 0 |
| 0 | 1  | 1 | 1 | 0 | 0 |
| 1 | 99 | 0 | 0 | 1 | 0 |
| 0 | 99 | 0 | 1 | 1 | 0 |
| 1 | 0  | 0 | 1 | 1 | 0 |
| 0 | 0  | 1 | 1 | 0 | 0 |
| 0 | 0  | 0 | 1 | 0 | 0 |
| 0 | 0  | 0 | 1 | 1 | 0 |
| 0 | 0  | 0 | 0 | 1 | 0 |
| 0 | 0  | 0 | 1 | 0 | 0 |
| 0 | 0  | 0 | 1 | 0 | 0 |
| 0 | 0  | 0 | 0 | 1 | 0 |
| 0 | 0  | 0 | 1 | 1 | 0 |
| 0 | 0  | 0 | 1 | 1 | 0 |
| 0 | 0  | 0 | 1 | 0 | 0 |
| 0 | 0  | 0 | 0 | 1 | 0 |
| 0 | 0  | 0 | 1 | 1 | 0 |
| 1 | 0  | 0 | 1 | 0 | 0 |
| 0 | 0  | 1 | 1 | 1 | 0 |
| 0 | 0  | 1 | 1 | 1 | 0 |
| 0 | 0  | 0 | 1 | 1 | 0 |
| 1 | 1  | 0 | 1 | 1 | 0 |
| 0 | 0  | 0 | 1 | 1 | 0 |

|   |   |   |   |   |   |
|---|---|---|---|---|---|
| 0 | 0 | 0 | 1 | 0 | 0 |
| 0 | 0 | 0 | 1 | 1 | 0 |
| 0 | 0 | 0 | 1 | 1 | 0 |
| 0 | 0 | 0 | 1 | 0 | 0 |
| 1 | 1 | 0 | 1 | 0 | 0 |
| 0 | 0 | 0 | 1 | 1 | 0 |
| 0 | 0 | 0 | 1 | 1 | 0 |
| 1 | 1 | 0 | 0 | 0 | 0 |
| 0 | 0 | 0 | 1 | 0 | 0 |
| 1 | 0 | 0 | 1 | 1 | 0 |
| 0 | 0 | 0 | 1 | 0 | 0 |
| 0 | 0 | 0 | 0 | 1 | 0 |
| 0 | 0 | 0 | 1 | 0 | 0 |
| 0 | 0 | 0 | 1 | 0 | 0 |
| 0 | 0 | 0 | 1 | 0 | 0 |
| 0 | 0 | 0 | 1 | 0 | 0 |
| 0 | 0 | 0 | 1 | 0 | 0 |
| 0 | 0 | 0 | 1 | 1 | 0 |
| 0 | 0 | 0 | 1 | 1 | 0 |
| 0 | 0 | 0 | 1 | 1 | 0 |
| 0 | 0 | 0 | 1 | 1 | 0 |
| 0 | 0 | 0 | 0 | 1 | 0 |
| 0 | 0 | 1 | 0 | 1 | 0 |
| 0 | 0 | 1 | 1 | 1 | 0 |
| 0 | 0 | 0 | 1 | 0 | 0 |
| 0 | 0 | 0 | 1 | 0 | 0 |
| 0 | 0 | 0 | 1 | 0 | 0 |
| 0 | 0 | 0 | 1 | 0 | 0 |
| 0 | 0 | 0 | 1 | 0 | 0 |
| 0 | 0 | 0 | 1 | 0 | 0 |
| 0 | 0 | 0 | 1 | 0 | 0 |
| 0 | 0 | 0 | 1 | 0 | 0 |
| 0 | 0 | 0 | 1 | 0 | 0 |
| 0 | 0 | 0 | 1 | 0 | 0 |
| 0 | 0 | 0 | 0 | 1 | 0 |
| 0 | 0 | 0 | 1 | 1 | 0 |
| 0 | 0 | 0 | 1 | 0 | 0 |
| 0 | 0 | 0 | 1 | 1 | 0 |
| 0 | 0 | 0 | 1 | 1 | 0 |
| 0 | 0 | 0 | 0 | 1 | 0 |
| 1 | 1 | 1 | 1 | 1 | 0 |
| 0 | 0 | 0 | 1 | 0 | 0 |
| 0 | 0 | 0 | 0 | 1 | 0 |
| 0 | 0 | 0 | 1 | 1 | 0 |
| 1 | 1 | 1 | 1 | 0 | 0 |
| 0 | 0 | 0 | 1 | 1 | 0 |
| 0 | 0 | 0 | 1 | 1 | 0 |



|    |    |    |   |   |   |
|----|----|----|---|---|---|
| 0  | 0  | 0  | 1 | 0 | 0 |
| 0  | 0  | 1  | 1 | 1 | 0 |
| 0  | 0  | 0  | 1 | 1 | 0 |
| 0  | 0  | 0  | 1 | 0 | 0 |
| 99 | 99 | 99 | 0 | 0 | 1 |
| 0  | 0  | 1  | 1 | 0 | 0 |
| 0  | 0  | 1  | 1 | 0 | 0 |
| 0  | 0  | 0  | 1 | 0 | 0 |
| 0  | 0  | 0  | 1 | 1 | 0 |
| 0  | 0  | 0  | 1 | 0 | 0 |
| 0  | 0  | 1  | 1 | 1 | 0 |
| 0  | 0  | 0  | 1 | 0 | 0 |
| 1  | 0  | 1  | 0 | 1 | 0 |
| 0  | 0  | 0  | 1 | 1 | 0 |
| 1  | 0  | 0  | 0 | 1 | 0 |
| 1  | 1  | 0  | 1 | 0 | 0 |
| 0  | 0  | 1  | 1 | 1 | 0 |
| 0  | 0  | 0  | 1 | 1 | 0 |
| 0  | 0  | 1  | 0 | 1 | 0 |
| 1  | 0  | 0  | 1 | 1 | 0 |
| 0  | 0  | 0  | 1 | 0 | 0 |
| 0  | 0  | 0  | 1 | 1 | 0 |
| 0  | 0  | 0  | 1 | 0 | 0 |
| 0  | 0  | 0  | 1 | 0 | 0 |
| 0  | 0  | 0  | 1 | 1 | 0 |
| 0  | 1  | 0  | 1 | 1 | 0 |
| 0  | 0  | 0  | 1 | 1 | 0 |
| 0  | 0  | 0  | 1 | 0 | 0 |
| 0  | 0  | 0  | 1 | 1 | 0 |
| 0  | 0  | 0  | 1 | 1 | 0 |
| 0  | 0  | 0  | 1 | 1 | 0 |
| 0  | 0  | 0  | 1 | 1 | 0 |
| 0  | 0  | 0  | 1 | 1 | 0 |
| 0  | 0  | 0  | 1 | 1 | 0 |
| 0  | 1  | 1  | 0 | 1 | 1 |
| 0  | 0  | 0  | 0 | 1 | 0 |
| 0  | 0  | 0  | 1 | 1 | 0 |
| 0  | 0  | 0  | 1 | 0 | 0 |
| 0  | 1  | 1  | 0 | 1 | 0 |
| 0  | 1  | 1  | 1 | 0 | 0 |
| 0  | 0  | 0  | 0 | 1 | 0 |
| 0  | 0  | 1  | 1 | 0 | 0 |
| 0  | 1  | 0  | 1 | 1 | 0 |
| 0  | 0  | 0  | 1 | 1 | 0 |
| 1  | 1  | 99 | 1 | 0 | 0 |
| 0  | 0  | 0  | 1 | 1 | 0 |
| 0  | 0  | 1  | 0 | 1 | 0 |

|   |   |   |   |   |   |
|---|---|---|---|---|---|
| 1 | 0 | 0 | 1 | 0 | 0 |
| 0 | 1 | 0 | 1 | 1 | 0 |
| 1 | 1 | 1 | 1 | 0 | 0 |
| 0 | 1 | 0 | 1 | 0 | 0 |
| 0 | 0 | 0 | 1 | 1 | 0 |
| 0 | 0 | 1 | 1 | 1 | 0 |
| 1 | 0 | 1 | 1 | 1 | 0 |
| 0 | 1 | 0 | 1 | 0 | 0 |
| 0 | 0 | 1 | 0 | 1 | 0 |
| 0 | 0 | 0 | 1 | 0 | 0 |
| 0 | 0 | 0 | 1 | 0 | 0 |
| 0 | 0 | 1 | 1 | 0 | 0 |
| 1 | 1 | 1 | 1 | 0 | 0 |
| 0 | 1 | 1 | 1 | 0 | 0 |
| 0 | 0 | 0 | 1 | 0 | 0 |
| 0 | 0 | 0 | 1 | 0 | 0 |
| 0 | 0 | 0 | 1 | 1 | 0 |
| 0 | 0 | 0 | 1 | 0 | 0 |
| 1 | 0 | 0 | 1 | 1 | 0 |
| 0 | 0 | 0 | 1 | 0 | 0 |
| 0 | 0 | 0 | 1 | 1 | 0 |
| 0 | 0 | 0 | 1 | 1 | 0 |
| 0 | 0 | 0 | 1 | 0 | 0 |
| 0 | 0 | 0 | 1 | 1 | 0 |
| 0 | 0 | 0 | 1 | 1 | 0 |
| 1 | 1 | 0 | 1 | 0 | 0 |
| 0 | 0 | 0 | 0 | 1 | 0 |
| 0 | 0 | 1 | 1 | 0 | 0 |
| 0 | 0 | 0 | 1 | 1 | 0 |
| 0 | 0 | 0 | 1 | 1 | 0 |
| 0 | 0 | 0 | 1 | 1 | 0 |
| 0 | 0 | 0 | 1 | 0 | 0 |
| 0 | 0 | 0 | 1 | 1 | 0 |
| 0 | 0 | 0 | 1 | 1 | 0 |
| 0 | 0 | 0 | 1 | 1 | 0 |
| 1 | 0 | 0 | 1 | 1 | 0 |
| 0 | 0 | 0 | 1 | 1 | 0 |
| 0 | 0 | 0 | 1 | 1 | 0 |
| 0 | 0 | 0 | 1 | 0 | 0 |

|   |   |   |   |   |   |
|---|---|---|---|---|---|
| 0 | 0 | 1 | 1 | 0 | 0 |
| 1 | 0 | 1 | 1 | 1 | 0 |
| 0 | 0 | 0 | 0 | 1 | 0 |
| 0 | 0 | 1 | 1 | 1 | 0 |
| 0 | 0 | 0 | 1 | 0 | 0 |
| 0 | 0 | 0 | 1 | 1 | 0 |
| 0 | 0 | 0 | 0 | 1 | 0 |
| 0 | 0 | 0 | 1 | 0 | 0 |
| 0 | 0 | 0 | 1 | 1 | 0 |
| 1 | 0 | 0 | 1 | 1 | 0 |
| 1 | 0 | 0 | 0 | 1 | 0 |
| 0 | 0 | 0 | 1 | 1 | 0 |
| 0 | 0 | 0 | 0 | 1 | 0 |
| 1 | 1 | 0 | 1 | 0 | 0 |
| 0 | 0 | 0 | 1 | 0 | 0 |
| 0 | 0 | 0 | 1 | 1 | 0 |
| 0 | 0 | 0 | 1 | 1 | 0 |
| 0 | 0 | 0 | 1 | 0 | 0 |
| 1 | 0 | 0 | 1 | 0 | 0 |
| 1 | 1 | 1 | 1 | 0 | 0 |
| 1 | 1 | 1 | 1 | 0 | 0 |
| 0 | 0 | 0 | 1 | 0 | 0 |
| 0 | 0 | 0 | 1 | 1 | 0 |
| 0 | 0 | 1 | 1 | 0 | 0 |
| 1 | 1 | 0 | 1 | 1 | 0 |
| 0 | 0 | 0 | 1 | 1 | 0 |
| 0 | 0 | 0 | 1 | 0 | 0 |
| 0 | 0 | 0 | 1 | 1 | 0 |
| 0 | 0 | 0 | 1 | 0 | 0 |
| 0 | 0 | 0 | 1 | 1 | 0 |
| 0 | 0 | 1 | 1 | 0 | 0 |
| 0 | 0 | 0 | 1 | 1 | 0 |
| 0 | 0 | 0 | 1 | 0 | 0 |
| 0 | 0 | 0 | 1 | 0 | 0 |
| 0 | 0 | 0 | 1 | 0 | 0 |
| 0 | 0 | 0 | 0 | 1 | 0 |
| 1 | 1 | 1 | 1 | 0 | 0 |
| 1 | 0 | 0 | 1 | 0 | 0 |
| 0 | 0 | 1 | 1 | 0 | 0 |
| 0 | 0 | 0 | 1 | 1 | 0 |

|    |    |    |   |   |   |
|----|----|----|---|---|---|
| 0  | 0  | 0  | 1 | 1 | 0 |
| 0  | 0  | 0  | 0 | 1 | 0 |
| 0  | 0  | 0  | 1 | 1 | 0 |
| 1  | 0  | 0  | 1 | 1 | 0 |
| 0  | 0  | 0  | 0 | 1 | 0 |
| 0  | 0  | 0  | 1 | 1 | 0 |
| 0  | 1  | 0  | 1 | 0 | 0 |
| 1  | 0  | 0  | 1 | 1 | 0 |
| 0  | 0  | 0  | 1 | 0 | 0 |
| 0  | 0  | 1  | 1 | 0 | 0 |
| 1  | 0  | 0  | 1 | 1 | 0 |
| 1  | 1  | 0  | 1 | 1 | 0 |
| 1  | 1  | 0  | 1 | 1 | 0 |
| 0  | 0  | 0  | 1 | 1 | 0 |
| 1  | 0  | 0  | 0 | 1 | 0 |
| 1  | 0  | 1  | 1 | 0 | 0 |
| 0  | 0  | 0  | 1 | 0 | 0 |
| 1  | 99 | 0  | 1 | 1 | 0 |
| 0  | 0  | 0  | 0 | 1 | 0 |
| 0  | 0  | 0  | 1 | 0 | 0 |
| 0  | 0  | 0  | 1 | 0 | 0 |
| 0  | 1  | 1  | 1 | 1 | 0 |
| 0  | 0  | 0  | 1 | 0 | 0 |
| 0  | 0  | 0  | 1 | 1 | 0 |
| 1  | 0  | 1  | 1 | 0 | 0 |
| 0  | 0  | 0  | 1 | 1 | 0 |
| 0  | 0  | 0  | 1 | 0 | 0 |
| 0  | 0  | 0  | 1 | 1 | 0 |
| 0  | 0  | 0  | 1 | 1 | 0 |
| 0  | 0  | 0  | 1 | 1 | 0 |
| 0  | 0  | 0  | 1 | 1 | 0 |
| 1  | 0  | 1  | 1 | 1 | 0 |
| 0  | 0  | 1  | 0 | 1 | 0 |
| 0  | 0  | 0  | 1 | 0 | 0 |
| 1  | 1  | 0  | 1 | 1 | 0 |
| 0  | 0  | 0  | 0 | 1 | 0 |
| 1  | 1  | 1  | 1 | 0 | 0 |
| 1  | 0  | 0  | 1 | 1 | 0 |
| 0  | 0  | 0  | 1 | 0 | 0 |
| 1  | 1  | 1  | 1 | 0 | 0 |
| 0  | 0  | 0  | 0 | 1 | 0 |
| 0  | 0  | 0  | 1 | 0 | 0 |
| 99 | 1  | 99 | 0 | 1 | 0 |
| 0  | 1  | 1  | 1 | 1 | 0 |
| 0  | 0  | 0  | 1 | 0 | 1 |
| 1  | 0  | 0  | 1 | 1 | 0 |
| 0  | 0  | 0  | 1 | 1 | 0 |
| 1  | 1  | 1  | 1 | 1 | 0 |

|   |    |   |   |   |   |
|---|----|---|---|---|---|
| 0 | 0  | 1 | 1 | 1 | 0 |
| 0 | 1  | 0 | 1 | 1 | 0 |
| 0 | 0  | 0 | 1 | 1 | 0 |
| 1 | 1  | 0 | 1 | 0 | 0 |
| 0 | 0  | 1 | 1 | 0 | 0 |
| 0 | 0  | 0 | 1 | 1 | 0 |
| 0 | 0  | 1 | 0 | 1 | 0 |
| 0 | 0  | 0 | 1 | 0 | 0 |
| 0 | 0  | 0 | 1 | 1 | 0 |
| 0 | 0  | 0 | 0 | 0 | 0 |
| 0 | 0  | 0 | 1 | 1 | 0 |
| 1 | 0  | 0 | 1 | 1 | 0 |
| 0 | 1  | 0 | 1 | 1 | 0 |
| 0 | 0  | 0 | 1 | 0 | 0 |
| 0 | 0  | 0 | 1 | 1 | 0 |
| 1 | 0  | 0 | 1 | 0 | 0 |
| 0 | 0  | 0 | 1 | 1 | 0 |
| 1 | 1  | 0 | 1 | 0 | 0 |
| 1 | 99 | 1 | 1 | 0 | 0 |
| 0 | 0  | 0 | 1 | 0 | 0 |
| 1 | 1  | 1 | 1 | 0 | 0 |
| 0 | 0  | 0 | 1 | 0 | 0 |
| 0 | 0  | 0 | 1 | 1 | 0 |
| 0 | 1  | 0 | 1 | 0 | 0 |
| 0 | 0  | 0 | 0 | 1 | 0 |
| 0 | 0  | 0 | 1 | 1 | 0 |
| 0 | 0  | 0 | 1 | 1 | 0 |
| 0 | 0  | 0 | 1 | 0 | 0 |
| 1 | 1  | 1 | 1 | 0 | 0 |
| 0 | 1  | 0 | 1 | 1 | 0 |
| 0 | 0  | 0 | 1 | 1 | 0 |
| 0 | 0  | 0 | 0 | 0 | 0 |
| 0 | 0  | 0 | 1 | 0 | 0 |
| 0 | 0  | 0 | 1 | 0 | 0 |
| 0 | 0  | 0 | 1 | 1 | 0 |
| 0 | 0  | 0 | 1 | 1 | 0 |
| 0 | 0  | 0 | 1 | 0 | 0 |
| 0 | 0  | 0 | 0 | 1 | 0 |
| 0 | 0  | 0 | 1 | 1 | 0 |
| 0 | 0  | 0 | 1 | 0 | 0 |
| 0 | 0  | 0 | 0 | 1 | 0 |
| 0 | 0  | 0 | 1 | 1 | 0 |
| 0 | 0  | 1 | 1 | 0 | 0 |
| 0 | 0  | 0 | 0 | 1 | 0 |
| 1 | 1  | 0 | 1 | 1 | 0 |
| 0 | 0  | 0 | 1 | 0 | 0 |
| 0 | 1  | 0 | 1 | 1 | 0 |

|    |    |    |   |   |   |
|----|----|----|---|---|---|
| 1  | 0  | 0  | 1 | 0 | 0 |
| 0  | 0  | 0  | 1 | 0 | 0 |
| 1  | 0  | 1  | 1 | 0 | 0 |
| 99 | 99 | 99 | 0 | 0 | 0 |
| 1  | 0  | 1  | 1 | 0 | 0 |
| 0  | 1  | 0  | 1 | 0 | 0 |
| 0  | 0  | 0  | 1 | 1 | 0 |
| 0  | 0  | 0  | 1 | 1 | 0 |
| 0  | 0  | 0  | 1 | 0 | 0 |
| 0  | 0  | 0  | 1 | 1 | 0 |
| 0  | 0  | 0  | 1 | 1 | 0 |
| 1  | 0  | 1  | 1 | 0 | 0 |
| 1  | 0  | 0  | 1 | 1 | 0 |
| 1  | 1  | 1  | 1 | 1 | 0 |
| 0  | 0  | 0  | 1 | 0 | 0 |
| 0  | 0  | 1  | 1 | 0 | 0 |
| 1  | 1  | 1  | 1 | 0 | 0 |
| 0  | 0  | 0  | 1 | 0 | 0 |
| 0  | 0  | 0  | 0 | 1 | 0 |
| 0  | 0  | 0  | 1 | 0 | 0 |
| 0  | 0  | 0  | 1 | 0 | 0 |
| 0  | 1  | 0  | 1 | 0 | 0 |
| 0  | 0  | 0  | 1 | 1 | 0 |
| 0  | 0  | 0  | 1 | 1 | 0 |
| 1  | 0  | 1  | 1 | 0 | 0 |
| 1  | 0  | 1  | 1 | 0 | 0 |
| 0  | 0  | 0  | 1 | 1 | 0 |
| 0  | 0  | 0  | 1 | 1 | 0 |
| 0  | 0  | 0  | 1 | 0 | 0 |
| 0  | 0  | 1  | 1 | 0 | 0 |
| 0  | 0  | 0  | 1 | 1 | 0 |
| 0  | 0  | 0  | 1 | 1 | 0 |
| 0  | 1  | 0  | 1 | 0 | 0 |
| 0  | 0  | 0  | 1 | 0 | 0 |
| 1  | 0  | 1  | 1 | 0 | 0 |
| 0  | 0  | 0  | 1 | 0 | 0 |
| 0  | 0  | 0  | 1 | 1 | 0 |
| 0  | 0  | 0  | 1 | 1 | 0 |
| 1  | 1  | 1  | 1 | 1 | 0 |
| 1  | 1  | 0  | 1 | 1 | 1 |
| 0  | 1  | 0  | 1 | 0 | 0 |
| 0  | 0  | 1  | 1 | 1 | 0 |
| 1  | 0  | 0  | 1 | 1 | 0 |
| 0  | 0  | 0  | 1 | 0 | 0 |
| 1  | 0  | 1  | 0 | 0 | 0 |
| 0  | 0  | 0  | 1 | 1 | 0 |

|    |   |   |   |   |   |
|----|---|---|---|---|---|
| 1  | 1 | 1 | 1 | 0 | 0 |
| 1  | 1 | 1 | 1 | 0 | 0 |
| 0  | 0 | 0 | 0 | 1 | 0 |
| 0  | 0 | 0 | 1 | 0 | 0 |
| 1  | 1 | 0 | 1 | 0 | 0 |
| 0  | 0 | 0 | 1 | 1 | 0 |
| 0  | 0 | 1 | 0 | 1 | 0 |
| 1  | 0 | 0 | 1 | 1 | 0 |
| 1  | 0 | 1 | 1 | 0 | 0 |
| 0  | 1 | 0 | 1 | 1 | 0 |
| 0  | 0 | 1 | 1 | 0 | 0 |
| 0  | 0 | 0 | 1 | 0 | 0 |
| 0  | 0 | 0 | 1 | 0 | 0 |
| 0  | 1 | 0 | 0 | 1 | 0 |
| 0  | 0 | 0 | 0 | 0 | 0 |
| 0  | 1 | 0 | 0 | 0 | 0 |
| 0  | 0 | 0 | 0 | 0 | 0 |
| 0  | 0 | 0 | 0 | 0 | 0 |
| 0  | 1 | 0 | 0 | 1 | 0 |
| 0  | 0 | 0 | 0 | 1 | 0 |
| 0  | 0 | 0 | 0 | 1 | 0 |
| 0  | 0 | 0 | 0 | 1 | 0 |
| 0  | 0 | 0 | 0 | 1 | 0 |
| 0  | 0 | 0 | 0 | 1 | 0 |
| 0  | 0 | 0 | 0 | 1 | 0 |
| 1  | 1 | 0 | 1 | 1 | 0 |
| 0  | 0 | 0 | 0 | 1 | 0 |
| 0  | 0 | 0 | 0 | 1 | 0 |
| 0  | 0 | 0 | 0 | 0 | 0 |
| 0  | 0 | 0 | 0 | 1 | 0 |
| 0  | 1 | 1 | 1 | 0 | 0 |
| 0  | 0 | 0 | 0 | 0 | 0 |
| 0  | 0 | 0 | 0 | 1 | 0 |
| 0  | 0 | 0 | 1 | 1 | 0 |
| 0  | 0 | 0 | 0 | 0 | 0 |
| 0  | 0 | 0 | 0 | 1 | 0 |
| 0  | 0 | 0 | 0 | 1 | 0 |
| 0  | 0 | 0 | 0 | 1 | 0 |
| 0  | 0 | 0 | 0 | 1 | 0 |
| 99 | 1 | 1 | 1 | 0 | 0 |
| 0  | 0 | 0 | 1 | 0 | 0 |





|    |    |    |   |   |   |
|----|----|----|---|---|---|
| 0  | 0  | 0  | 0 | 1 | 0 |
| 0  | 0  | 0  | 1 | 1 | 0 |
| 0  | 0  | 0  | 1 | 1 | 0 |
| 0  | 0  | 0  | 1 | 1 | 0 |
| 0  | 0  | 0  | 1 | 1 | 0 |
| 0  | 0  | 0  | 1 | 0 | 0 |
| 99 | 99 | 99 | 1 | 0 | 0 |
| 0  | 1  | 0  | 1 | 0 | 0 |
| 0  | 0  | 1  | 1 | 1 | 0 |
| 0  | 0  | 0  | 1 | 1 | 0 |
| 0  | 0  | 0  | 1 | 0 | 0 |
| 0  | 0  | 0  | 1 | 0 | 0 |
| 0  | 0  | 0  | 0 | 0 | 0 |
| 0  | 0  | 0  | 1 | 0 | 0 |
| 0  | 0  | 0  | 1 | 1 | 0 |
| 0  | 0  | 1  | 1 | 1 | 0 |
| 99 | 99 | 0  | 1 | 1 | 0 |
| 1  | 0  | 0  | 1 | 1 | 0 |
| 0  | 0  | 0  | 1 | 0 | 0 |
| 0  | 0  | 0  | 0 | 1 | 0 |
| 0  | 0  | 0  | 1 | 1 | 0 |
| 1  | 1  | 1  | 1 | 1 | 0 |
| 1  | 0  | 1  | 1 | 1 | 0 |
| 0  | 0  | 0  | 0 | 1 | 0 |
| 1  | 0  | 0  | 1 | 0 | 0 |
| 0  | 0  | 0  | 1 | 0 | 0 |
| 0  | 0  | 0  | 1 | 0 | 0 |
| 99 | 99 | 99 | 1 | 0 | 0 |
| 0  | 1  | 0  | 1 | 0 | 0 |
| 0  | 0  | 0  | 0 | 0 | 0 |
| 0  | 1  | 1  | 1 | 1 | 0 |
| 1  | 0  | 0  | 1 | 1 | 0 |
| 0  | 0  | 0  | 1 | 0 | 0 |
| 0  | 1  | 0  | 1 | 0 | 0 |
| 0  | 0  | 0  | 1 | 1 | 0 |
| 0  | 0  | 0  | 1 | 1 | 0 |
| 0  | 0  | 0  | 1 | 0 | 0 |
| 1  | 1  | 1  | 1 | 1 | 0 |
| 0  | 0  | 0  | 1 | 0 | 0 |
| 0  | 0  | 0  | 1 | 1 | 0 |
| 0  | 0  | 0  | 1 | 1 | 0 |
| 0  | 0  | 0  | 1 | 1 | 0 |
| 0  | 1  | 0  | 1 | 1 | 0 |
| 1  | 1  | 0  | 1 | 1 | 0 |
| 0  | 0  | 0  | 1 | 0 | 0 |
| 0  | 0  | 0  | 0 | 1 | 0 |
| 0  | 0  | 0  | 1 | 0 | 0 |



|    |    |    |   |   |   |
|----|----|----|---|---|---|
| 0  | 0  | 0  | 1 | 0 | 0 |
| 0  | 0  | 0  | 1 | 0 | 0 |
| 1  | 1  | 0  | 1 | 1 | 0 |
| 0  | 0  | 0  | 1 | 0 | 0 |
| 1  | 0  | 0  | 1 | 1 | 0 |
| 1  | 1  | 0  | 1 | 0 | 0 |
| 0  | 0  | 1  | 1 | 0 | 0 |
| 0  | 0  | 0  | 1 | 1 | 0 |
| 0  | 0  | 0  | 1 | 0 | 0 |
| 1  | 0  | 0  | 1 | 0 | 0 |
| 0  | 0  | 0  | 1 | 1 | 0 |
| 0  | 0  | 0  | 0 | 1 | 0 |
| 0  | 0  | 0  | 1 | 1 | 0 |
| 0  | 0  | 1  | 1 | 1 | 0 |
| 1  | 1  | 1  | 1 | 0 | 0 |
| 1  | 0  | 1  | 1 | 0 | 0 |
| 0  | 0  | 0  | 0 | 1 | 0 |
| 1  | 0  | 0  | 1 | 1 | 0 |
| 0  | 0  | 0  | 1 | 1 | 0 |
| 0  | 0  | 0  | 1 | 1 | 0 |
| 0  | 0  | 0  | 1 | 1 | 0 |
| 0  | 0  | 0  | 1 | 1 | 0 |
| 0  | 0  | 0  | 1 | 1 | 0 |
| 0  | 0  | 0  | 1 | 1 | 0 |
| 0  | 0  | 1  | 1 | 1 | 0 |
| 1  | 0  | 0  | 1 | 0 | 0 |
| 0  | 0  | 0  | 1 | 1 | 0 |
| 0  | 0  | 0  | 1 | 1 | 0 |
| 0  | 0  | 0  | 1 | 1 | 0 |
| 0  | 0  | 0  | 1 | 1 | 0 |
| 0  | 0  | 0  | 1 | 1 | 0 |
| 0  | 0  | 0  | 1 | 1 | 0 |
| 0  | 0  | 0  | 1 | 1 | 0 |
| 0  | 0  | 0  | 1 | 1 | 0 |
| 1  | 1  | 1  | 1 | 1 | 0 |
| 0  | 0  | 0  | 1 | 1 | 0 |
| 0  | 0  | 0  | 0 | 1 | 0 |
| 1  | 0  | 0  | 1 | 0 | 0 |
| 0  | 0  | 0  | 1 | 0 | 0 |
| 0  | 0  | 0  | 0 | 1 | 0 |
| 99 | 99 | 99 | 0 | 0 | 0 |



|   |   |    |   |   |   |
|---|---|----|---|---|---|
| 0 | 0 | 0  | 1 | 1 | 0 |
| 0 | 0 | 99 | 1 | 1 | 0 |
| 1 | 0 | 0  | 1 | 0 | 0 |
| 0 | 0 | 0  | 1 | 1 | 0 |
| 0 | 0 | 0  | 0 | 1 | 0 |
| 0 | 0 | 0  | 1 | 0 | 0 |
| 0 | 1 | 0  | 1 | 1 | 0 |
| 0 | 0 | 0  | 1 | 0 | 0 |
| 1 | 1 | 0  | 1 | 1 | 0 |
| 0 | 0 | 0  | 1 | 1 | 0 |
| 0 | 0 | 0  | 1 | 0 | 0 |
| 0 | 0 | 0  | 1 | 1 | 0 |
| 1 | 0 | 1  | 1 | 0 | 0 |
| 0 | 0 | 0  | 1 | 0 | 0 |
| 0 | 0 | 0  | 1 | 1 | 0 |
| 1 | 0 | 1  | 1 | 0 | 0 |
| 0 | 0 | 0  | 1 | 0 | 0 |
| 0 | 0 | 0  | 1 | 1 | 0 |
| 1 | 0 | 0  | 1 | 0 | 0 |
| 0 | 0 | 0  | 1 | 1 | 0 |
| 0 | 0 | 0  | 1 | 0 | 0 |
| 0 | 1 | 0  | 1 | 0 | 0 |
| 0 | 0 | 0  | 1 | 1 | 0 |
| 1 | 0 | 0  | 1 | 0 | 0 |
| 0 | 0 | 0  | 1 | 1 | 0 |
| 0 | 0 | 0  | 1 | 0 | 0 |
| 0 | 0 | 0  | 1 | 1 | 0 |
| 1 | 0 | 1  | 0 | 1 | 0 |
| 1 | 0 | 1  | 1 | 0 | 0 |
| 0 | 0 | 0  | 1 | 1 | 0 |
| 0 | 0 | 0  | 1 | 1 | 0 |
| 1 | 0 | 1  | 0 | 1 | 0 |
| 0 | 1 | 1  | 1 | 0 | 0 |
| 0 | 0 | 99 | 1 | 1 | 0 |
| 0 | 0 | 0  | 1 | 1 | 0 |
| 0 | 0 | 0  | 0 | 1 | 0 |
| 0 | 0 | 0  | 1 | 1 | 0 |
| 0 | 0 | 0  | 1 | 1 | 0 |
| 0 | 0 | 0  | 1 | 1 | 0 |
| 0 | 0 | 1  | 0 | 1 | 0 |
| 0 | 0 | 1  | 1 | 1 | 0 |

|    |    |    |   |   |   |
|----|----|----|---|---|---|
| 0  | 0  | 0  | 1 | 1 | 0 |
| 1  | 0  | 0  | 1 | 1 | 0 |
| 0  | 0  | 0  | 1 | 1 | 0 |
| 0  | 0  | 0  | 1 | 0 | 0 |
| 0  | 0  | 0  | 0 | 1 | 0 |
| 1  | 0  | 0  | 1 | 1 | 0 |
| 0  | 0  | 0  | 1 | 0 | 0 |
| 0  | 0  | 0  | 1 | 0 | 0 |
| 0  | 0  | 0  | 1 | 1 | 0 |
| 1  | 1  | 0  | 1 | 1 | 0 |
| 0  | 0  | 0  | 1 | 0 | 0 |
| 0  | 0  | 0  | 1 | 0 | 0 |
| 0  | 0  | 99 | 1 | 1 | 0 |
| 0  | 0  | 0  | 1 | 0 | 0 |
| 1  | 1  | 1  | 1 | 1 | 0 |
| 0  | 0  | 0  | 1 | 0 | 0 |
| 0  | 0  | 0  | 1 | 1 | 0 |
| 0  | 0  | 0  | 1 | 0 | 0 |
| 1  | 1  | 0  | 1 | 0 | 0 |
| 0  | 0  | 1  | 1 | 0 | 0 |
| 0  | 0  | 0  | 1 | 0 | 0 |
| 0  | 1  | 0  | 1 | 0 | 0 |
| 0  | 0  | 1  | 1 | 0 | 0 |
| 1  | 1  | 1  | 1 | 1 | 0 |
| 0  | 0  | 0  | 1 | 0 | 0 |
| 0  | 0  | 1  | 1 | 1 | 0 |
| 0  | 0  | 0  | 1 | 0 | 0 |
| 0  | 0  | 0  | 1 | 0 | 0 |
| 0  | 0  | 0  | 1 | 0 | 0 |
| 0  | 0  | 1  | 1 | 0 | 0 |
| 0  | 0  | 1  | 1 | 1 | 0 |
| 0  | 0  | 0  | 1 | 1 | 0 |
| 0  | 0  | 1  | 1 | 0 | 0 |
| 0  | 1  | 0  | 1 | 0 | 0 |
| 0  | 0  | 0  | 0 | 1 | 0 |
| 1  | 0  | 1  | 1 | 0 | 0 |
| 0  | 1  | 0  | 1 | 0 | 0 |
| 0  | 0  | 0  | 1 | 1 | 0 |
| 1  | 1  | 0  | 1 | 1 | 0 |
| 0  | 0  | 0  | 1 | 0 | 0 |
| 1  | 0  | 0  | 0 | 0 | 0 |
| 0  | 0  | 1  | 1 | 0 | 0 |
| 99 | 99 | 99 | 1 | 1 | 0 |
| 0  | 0  | 0  | 1 | 0 | 0 |
| 0  | 0  | 0  | 1 | 1 | 0 |
| 1  | 1  | 0  | 1 | 1 | 0 |
| 1  | 0  | 1  | 1 | 1 | 0 |
| 1  | 0  | 1  | 1 | 0 | 0 |
| 0  | 0  | 0  | 1 | 0 | 0 |

|    |    |    |   |   |   |
|----|----|----|---|---|---|
| 0  | 0  | 0  | 1 | 1 | 0 |
| 1  | 0  | 0  | 1 | 1 | 0 |
| 0  | 0  | 0  | 1 | 0 | 0 |
| 0  | 0  | 0  | 1 | 1 | 0 |
| 1  | 0  | 0  | 1 | 0 | 0 |
| 0  | 1  | 1  | 0 | 0 | 1 |
| 0  | 0  | 0  | 1 | 0 | 0 |
| 0  | 0  | 0  | 1 | 1 | 0 |
| 0  | 0  | 0  | 1 | 1 | 0 |
| 0  | 0  | 1  | 1 | 0 | 0 |
| 99 | 99 | 99 | 1 | 0 | 0 |
| 0  | 0  | 1  | 1 | 0 | 0 |
| 0  | 0  | 0  | 1 | 1 | 0 |
| 0  | 0  | 0  | 1 | 0 | 0 |
| 1  | 1  | 1  | 1 | 1 | 0 |
| 0  | 0  | 0  | 1 | 1 | 0 |
| 0  | 0  | 1  | 1 | 0 | 0 |
| 0  | 0  | 0  | 1 | 0 | 0 |
| 0  | 0  | 0  | 1 | 1 | 0 |
| 0  | 0  | 1  | 0 | 1 | 0 |
| 1  | 0  | 0  | 1 | 0 | 0 |
| 0  | 0  | 0  | 1 | 0 | 0 |
| 0  | 0  | 0  | 1 | 1 | 0 |
| 0  | 0  | 0  | 1 | 0 | 0 |
| 0  | 1  | 0  | 1 | 1 | 0 |
| 99 | 99 | 99 | 0 | 1 | 0 |
| 0  | 0  | 0  | 1 | 0 | 0 |
| 0  | 0  | 0  | 1 | 1 | 0 |
| 0  | 0  | 0  | 0 | 1 | 0 |
| 0  | 1  | 1  | 1 | 1 | 0 |
| 0  | 0  | 99 | 1 | 1 | 0 |
| 0  | 0  | 0  | 0 | 1 | 0 |
| 1  | 0  | 0  | 1 | 0 | 0 |
| 1  | 0  | 1  | 1 | 1 | 0 |
| 1  | 1  | 0  | 1 | 1 | 0 |
| 0  | 0  | 0  | 1 | 0 | 0 |
| 0  | 0  | 0  | 1 | 1 | 0 |
| 0  | 0  | 0  | 1 | 0 | 0 |
| 0  | 0  | 0  | 1 | 1 | 0 |
| 1  | 1  | 0  | 1 | 1 | 0 |
| 1  | 0  | 0  | 1 | 1 | 0 |
| 99 | 0  | 0  | 1 | 1 | 0 |
| 0  | 0  | 0  | 1 | 1 | 0 |
| 0  | 0  | 0  | 1 | 1 | 0 |
| 1  | 1  | 1  | 1 | 1 | 0 |
| 0  | 0  | 0  | 1 | 0 | 0 |
| 1  | 0  | 0  | 1 | 1 | 0 |

|    |    |    |   |   |   |
|----|----|----|---|---|---|
| 0  | 0  | 0  | 1 | 1 | 0 |
| 0  | 1  | 0  | 1 | 0 | 0 |
| 0  | 0  | 1  | 1 | 0 | 0 |
| 0  | 0  | 0  | 1 | 0 | 0 |
| 0  | 0  | 0  | 1 | 0 | 0 |
| 0  | 0  | 0  | 1 | 1 | 0 |
| 0  | 0  | 0  | 0 | 1 | 0 |
| 0  | 1  | 0  | 1 | 0 | 0 |
| 0  | 0  | 0  | 1 | 1 | 0 |
| 0  | 0  | 0  | 1 | 0 | 0 |
| 0  | 1  | 0  | 1 | 0 | 0 |
| 99 | 99 | 99 | 0 | 0 | 0 |
| 0  | 0  | 0  | 1 | 1 | 0 |
| 0  | 0  | 0  | 1 | 0 | 0 |
| 0  | 0  | 0  | 1 | 1 | 0 |
| 1  | 1  | 0  | 1 | 0 | 0 |
| 0  | 0  | 1  | 1 | 0 | 0 |
| 0  | 1  | 1  | 1 | 0 | 0 |
| 1  | 0  | 1  | 1 | 1 | 0 |
| 0  | 0  | 0  | 1 | 0 | 0 |
| 0  | 0  | 0  | 1 | 1 | 0 |
| 0  | 0  | 0  | 1 | 1 | 0 |
| 0  | 0  | 1  | 1 | 0 | 0 |
| 0  | 0  | 0  | 1 | 0 | 0 |
| 0  | 0  | 0  | 1 | 1 | 0 |
| 0  | 0  | 0  | 1 | 0 | 0 |
| 0  | 0  | 1  | 1 | 0 | 0 |
| 0  | 1  | 0  | 1 | 1 | 0 |
| 0  | 1  | 0  | 1 | 0 | 1 |
| 0  | 0  | 0  | 1 | 0 | 0 |
| 0  | 0  | 0  | 0 | 1 | 0 |
| 99 | 99 | 99 | 0 | 0 | 0 |
| 0  | 0  | 0  | 1 | 0 | 0 |
| 1  | 1  | 0  | 1 | 0 | 0 |
| 0  | 0  | 0  | 1 | 0 | 0 |
| 0  | 0  | 1  | 1 | 1 | 0 |
| 0  | 0  | 0  | 0 | 1 | 0 |
| 0  | 1  | 0  | 1 | 0 | 0 |
| 0  | 0  | 0  | 1 | 1 | 0 |
| 1  | 1  | 1  | 1 | 1 | 0 |
| 0  | 0  | 0  | 1 | 1 | 0 |
| 0  | 0  | 0  | 1 | 0 | 0 |
| 0  | 0  | 0  | 1 | 0 | 0 |
| 0  | 0  | 0  | 1 | 0 | 0 |
| 0  | 0  | 0  | 1 | 0 | 0 |
| 1  | 0  | 1  | 1 | 0 | 0 |
| 0  | 0  | 0  | 1 | 0 | 0 |
| 0  | 0  | 0  | 1 | 1 | 0 |



|    |    |    |   |   |   |
|----|----|----|---|---|---|
| 0  | 0  | 0  | 0 | 1 | 0 |
| 1  | 1  | 1  | 1 | 0 | 0 |
| 0  | 0  | 0  | 1 | 1 | 0 |
| 1  | 1  | 0  | 1 | 1 | 0 |
| 0  | 0  | 0  | 1 | 1 | 0 |
| 0  | 0  | 0  | 1 | 1 | 0 |
| 0  | 0  | 0  | 1 | 0 | 0 |
| 0  | 0  | 0  | 1 | 0 | 0 |
| 1  | 1  | 1  | 1 | 0 | 0 |
| 1  | 1  | 0  | 1 | 1 | 0 |
| 99 | 0  | 0  | 1 | 0 | 0 |
| 0  | 0  | 0  | 0 | 1 | 0 |
| 1  | 1  | 1  | 1 | 0 | 0 |
| 0  | 0  | 1  | 0 | 1 | 0 |
| 0  | 0  | 1  | 1 | 0 | 0 |
| 1  | 0  | 0  | 1 | 0 | 0 |
| 1  | 1  | 1  | 1 | 0 | 0 |
| 0  | 1  | 1  | 1 | 1 | 0 |
| 1  | 0  | 1  | 1 | 0 | 0 |
| 0  | 0  | 0  | 1 | 1 | 0 |
| 0  | 0  | 0  | 1 | 1 | 0 |
| 0  | 1  | 1  | 1 | 0 | 0 |
| 0  | 0  | 0  | 0 | 1 | 0 |
| 0  | 0  | 0  | 0 | 1 | 0 |
| 99 | 99 | 99 | 0 | 1 | 0 |
| 0  | 0  | 0  | 1 | 0 | 0 |
| 0  | 0  | 0  | 1 | 0 | 0 |
| 1  | 1  | 0  | 1 | 0 | 0 |
| 0  | 0  | 0  | 1 | 0 | 0 |
| 0  | 0  | 0  | 1 | 0 | 0 |
| 0  | 0  | 0  | 1 | 1 | 0 |
| 0  | 0  | 0  | 0 | 1 | 0 |
| 0  | 0  | 0  | 1 | 1 | 0 |
| 0  | 0  | 0  | 1 | 0 | 0 |
| 1  | 0  | 1  | 0 | 1 | 0 |
| 0  | 0  | 0  | 1 | 0 | 0 |
| 0  | 0  | 0  | 1 | 0 | 0 |
| 0  | 0  | 0  | 1 | 0 | 0 |
| 0  | 0  | 0  | 1 | 1 | 0 |
| 0  | 0  | 0  | 1 | 1 | 0 |
| 0  | 0  | 0  | 0 | 1 | 0 |
| 0  | 1  | 1  | 1 | 0 | 0 |
| 0  | 0  | 0  | 0 | 1 | 0 |
| 0  | 0  | 0  | 0 | 0 | 0 |
| 0  | 0  | 1  | 1 | 1 | 0 |
| 0  | 0  | 0  | 0 | 1 | 0 |
| 0  | 0  | 0  | 0 | 1 | 0 |

|    |    |    |   |   |   |
|----|----|----|---|---|---|
| 0  | 0  | 0  | 1 | 1 | 0 |
| 0  | 1  | 0  | 1 | 1 | 0 |
| 1  | 1  | 1  | 1 | 0 | 0 |
| 0  | 1  | 0  | 1 | 0 | 0 |
| 99 | 0  | 0  | 0 | 1 | 0 |
| 1  | 0  | 0  | 1 | 1 | 0 |
| 99 | 0  | 0  | 0 | 1 | 0 |
| 0  | 1  | 1  | 1 | 0 | 0 |
| 0  | 0  | 0  | 1 | 1 | 0 |
| 0  | 1  | 1  | 1 | 1 | 0 |
| 0  | 1  | 0  | 1 | 1 | 0 |
| 0  | 1  | 0  | 1 | 0 | 0 |
| 0  | 1  | 1  | 1 | 1 | 0 |
| 0  | 0  | 0  | 1 | 0 | 0 |
| 99 | 99 | 99 | 1 | 1 | 0 |
| 0  | 0  | 0  | 1 | 1 | 0 |
| 0  | 0  | 0  | 1 | 1 | 0 |
| 0  | 0  | 0  | 1 | 1 | 0 |
| 99 | 99 | 99 | 0 | 0 | 0 |
| 0  | 0  | 0  | 1 | 0 | 0 |
| 0  | 1  | 0  | 1 | 0 | 0 |
| 0  | 1  | 0  | 1 | 0 | 0 |
| 1  | 0  | 0  | 1 | 0 | 0 |
| 0  | 0  | 0  | 1 | 0 | 0 |
| 0  | 0  | 0  | 1 | 0 | 0 |
| 0  | 0  | 0  | 1 | 1 | 0 |
| 0  | 0  | 0  | 1 | 0 | 0 |
| 0  | 0  | 0  | 1 | 1 | 0 |
| 0  | 0  | 0  | 1 | 0 | 0 |
| 0  | 0  | 0  | 1 | 1 | 0 |
| 0  | 0  | 0  | 1 | 1 | 0 |
| 0  | 0  | 0  | 1 | 1 | 0 |
| 0  | 0  | 0  | 1 | 1 | 0 |
| 0  | 0  | 0  | 1 | 1 | 0 |
| 0  | 0  | 0  | 1 | 1 | 0 |
| 0  | 0  | 0  | 1 | 0 | 0 |
| 0  | 0  | 0  | 1 | 1 | 0 |
| 0  | 0  | 0  | 1 | 1 | 0 |
| 1  | 0  | 0  | 1 | 0 | 0 |
| 0  | 0  | 0  | 1 | 1 | 0 |
| 0  | 0  | 0  | 1 | 1 | 0 |
| 0  | 1  | 0  | 1 | 1 | 0 |
| 0  | 0  | 0  | 1 | 1 | 0 |
| 0  | 0  | 0  | 1 | 1 | 0 |
| 0  | 0  | 0  | 1 | 0 | 0 |
| 0  | 0  | 0  | 1 | 1 | 0 |
| 1  | 1  | 1  | 1 | 1 | 0 |
| 0  | 0  | 0  | 1 | 0 | 0 |



|   |   |   |   |   |   |
|---|---|---|---|---|---|
| 1 | 0 | 0 | 1 | 0 | 0 |
| 1 | 0 | 1 | 1 | 1 | 0 |
| 1 | 0 | 1 | 1 | 0 | 0 |
| 0 | 0 | 0 | 1 | 0 | 0 |
| 0 | 0 | 0 | 0 | 1 | 0 |
| 0 | 0 | 0 | 1 | 1 | 0 |
| 1 | 1 | 1 | 1 | 0 | 0 |
| 0 | 1 | 0 | 1 | 0 | 0 |
| 0 | 0 | 0 | 1 | 1 | 0 |
| 0 | 1 | 0 | 1 | 0 | 0 |
| 1 | 0 | 0 | 1 | 1 | 0 |
| 0 | 0 | 0 | 1 | 0 | 0 |
| 1 | 0 | 0 | 1 | 1 | 0 |
| 0 | 0 | 0 | 1 | 1 | 0 |
| 0 | 0 | 0 | 1 | 1 | 0 |
| 1 | 0 | 0 | 1 | 0 | 0 |
| 0 | 0 | 0 | 1 | 1 | 0 |
| 0 | 0 | 0 | 1 | 1 | 0 |
| 1 | 0 | 0 | 1 | 0 | 0 |
| 0 | 0 | 0 | 1 | 1 | 0 |
| 0 | 0 | 0 | 1 | 1 | 0 |
| 1 | 0 | 0 | 1 | 1 | 0 |
| 0 | 0 | 0 | 1 | 1 | 0 |
| 0 | 0 | 0 | 1 | 1 | 0 |
| 0 | 0 | 0 | 1 | 1 | 0 |
| 0 | 0 | 0 | 1 | 1 | 0 |
| 0 | 0 | 0 | 1 | 1 | 0 |
| 0 | 0 | 0 | 1 | 1 | 0 |
| 0 | 0 | 0 | 1 | 1 | 0 |
| 1 | 0 | 0 | 1 | 0 | 0 |
| 0 | 1 | 0 | 1 | 1 | 0 |
| 0 | 1 | 0 | 1 | 0 | 0 |
| 0 | 0 | 0 | 1 | 0 | 0 |
| 1 | 0 | 1 | 1 | 1 | 0 |
| 0 | 0 | 0 | 1 | 0 | 0 |
| 0 | 0 | 0 | 1 | 1 | 0 |

|    |    |    |   |   |   |
|----|----|----|---|---|---|
| 0  | 1  | 0  | 1 | 1 | 0 |
| 0  | 0  | 0  | 1 | 0 | 0 |
| 1  | 1  | 0  | 1 | 1 | 0 |
| 1  | 1  | 1  | 1 | 0 | 0 |
| 0  | 0  | 0  | 1 | 0 | 0 |
| 0  | 0  | 1  | 1 | 1 | 0 |
| 0  | 0  | 0  | 1 | 1 | 0 |
| 1  | 1  | 0  | 0 | 1 | 0 |
| 0  | 1  | 0  | 1 | 0 | 0 |
| 0  | 0  | 0  | 1 | 1 | 0 |
| 0  | 0  | 1  | 1 | 0 | 0 |
| 0  | 0  | 0  | 0 | 1 | 0 |
| 0  | 0  | 0  | 1 | 1 | 0 |
| 0  | 0  | 0  | 1 | 1 | 0 |
| 1  | 1  | 0  | 1 | 1 | 0 |
| 1  | 0  | 0  | 1 | 1 | 0 |
| 0  | 0  | 0  | 1 | 0 | 0 |
| 0  | 0  | 0  | 1 | 1 | 0 |
| 0  | 0  | 1  | 0 | 1 | 0 |
| 0  | 0  | 0  | 1 | 1 | 0 |
| 0  | 0  | 0  | 1 | 1 | 0 |
| 1  | 0  | 0  | 1 | 0 | 0 |
| 0  | 0  | 0  | 1 | 1 | 0 |
| 1  | 0  | 0  | 0 | 1 | 0 |
| 1  | 0  | 0  | 0 | 0 | 1 |
| 0  | 0  | 0  | 1 | 0 | 0 |
| 1  | 0  | 0  | 1 | 0 | 0 |
| 0  | 0  | 0  | 1 | 0 | 0 |
| 1  | 1  | 0  | 1 | 0 | 0 |
| 1  | 1  | 0  | 1 | 0 | 0 |
| 0  | 0  | 0  | 0 | 0 | 0 |
| 0  | 0  | 0  | 1 | 1 | 0 |
| 0  | 0  | 0  | 1 | 0 | 0 |
| 0  | 0  | 0  | 1 | 1 | 0 |
| 0  | 0  | 0  | 1 | 1 | 0 |
| 0  | 1  | 0  | 1 | 0 | 0 |
| 0  | 0  | 0  | 1 | 0 | 0 |
| 0  | 0  | 0  | 1 | 1 | 0 |
| 0  | 0  | 1  | 1 | 0 | 0 |
| 0  | 0  | 0  | 1 | 1 | 0 |
| 0  | 0  | 0  | 1 | 1 | 0 |
| 0  | 0  | 0  | 1 | 0 | 0 |
| 0  | 0  | 0  | 1 | 1 | 0 |
| 0  | 0  | 0  | 1 | 1 | 0 |
| 0  | 0  | 0  | 1 | 0 | 0 |
| 99 | 99 | 99 | 1 | 0 | 0 |
| 0  | 0  | 0  | 1 | 0 | 0 |
| 0  | 0  | 1  | 1 | 0 | 0 |
| 0  | 0  | 0  | 1 | 1 | 0 |
| 0  | 0  | 0  | 1 | 1 | 0 |
| 0  | 0  | 0  | 0 | 1 | 0 |
| 0  | 0  | 0  | 1 | 0 | 0 |

|    |    |   |   |   |   |
|----|----|---|---|---|---|
| 0  | 0  | 0 | 1 | 0 | 0 |
| 1  | 1  | 0 | 1 | 1 | 0 |
| 0  | 0  | 0 | 1 | 1 | 0 |
| 0  | 0  | 0 | 1 | 0 | 0 |
| 0  | 0  | 0 | 1 | 0 | 0 |
| 0  | 99 | 0 | 1 | 1 | 0 |
| 1  | 1  | 0 | 1 | 1 | 0 |
| 1  | 0  | 0 | 1 | 1 | 0 |
| 0  | 0  | 0 | 1 | 0 | 0 |
| 0  | 0  | 0 | 1 | 1 | 0 |
| 0  | 0  | 0 | 1 | 0 | 0 |
| 0  | 0  | 0 | 1 | 0 | 0 |
| 1  | 0  | 1 | 1 | 0 | 0 |
| 99 | 99 | 0 | 1 | 1 | 0 |
| 0  | 0  | 0 | 1 | 0 | 0 |
| 0  | 0  | 1 | 1 | 0 | 0 |
| 1  | 1  | 0 | 1 | 0 | 0 |
| 1  | 1  | 0 | 1 | 0 | 0 |
| 0  | 0  | 0 | 1 | 0 | 0 |
| 1  | 1  | 1 | 1 | 0 | 0 |
| 0  | 0  | 1 | 1 | 0 | 0 |
| 0  | 99 | 1 | 1 | 0 | 0 |
| 0  | 1  | 0 | 1 | 0 | 0 |
| 0  | 0  | 1 | 1 | 0 | 0 |
| 0  | 0  | 0 | 1 | 0 | 0 |
| 0  | 0  | 0 | 1 | 1 | 0 |
| 0  | 0  | 0 | 1 | 0 | 0 |
| 0  | 0  | 0 | 1 | 0 | 0 |
| 0  | 0  | 0 | 1 | 0 | 0 |
| 0  | 0  | 0 | 1 | 0 | 0 |
| 0  | 0  | 1 | 1 | 0 | 0 |
| 0  | 0  | 0 | 1 | 1 | 0 |
| 0  | 0  | 0 | 1 | 0 | 0 |
| 0  | 0  | 0 | 1 | 0 | 0 |
| 0  | 0  | 0 | 0 | 1 | 0 |
| 1  | 1  | 1 | 0 | 1 | 0 |
| 0  | 0  | 0 | 1 | 0 | 0 |
| 0  | 0  | 1 | 1 | 1 | 0 |
| 0  | 0  | 0 | 0 | 1 | 0 |
| 0  | 0  | 0 | 1 | 1 | 0 |
| 0  | 0  | 0 | 0 | 1 | 0 |
| 0  | 0  | 0 | 1 | 1 | 0 |
| 0  | 0  | 0 | 0 | 1 | 0 |
| 0  | 0  | 0 | 1 | 0 | 0 |
| 0  | 0  | 0 | 1 | 1 | 0 |
| 0  | 0  | 0 | 1 | 0 | 0 |
| 0  | 0  | 0 | 1 | 0 | 0 |
| 0  | 0  | 0 | 1 | 0 | 0 |
| 0  | 0  | 0 | 1 | 0 | 0 |
| 0  | 0  | 0 | 1 | 0 | 0 |
| 0  | 0  | 0 | 1 | 0 | 0 |
| 0  | 0  | 0 | 1 | 0 | 0 |
| 1  | 1  | 0 | 1 | 0 | 0 |
| 0  | 0  | 0 | 0 | 1 | 0 |

|    |    |    |   |   |   |
|----|----|----|---|---|---|
| 1  | 0  | 0  | 1 | 0 | 0 |
| 0  | 0  | 0  | 1 | 0 | 0 |
| 0  | 0  | 0  | 0 | 1 | 0 |
| 0  | 0  | 0  | 0 | 1 | 0 |
| 0  | 0  | 0  | 1 | 1 | 0 |
| 0  | 0  | 0  | 0 | 1 | 0 |
| 0  | 1  | 1  | 1 | 0 | 0 |
| 0  | 0  | 0  | 1 | 0 | 0 |
| 0  | 0  | 0  | 1 | 0 | 0 |
| 0  | 0  | 0  | 1 | 0 | 0 |
| 1  | 0  | 0  | 1 | 0 | 0 |
| 1  | 0  | 0  | 1 | 0 | 0 |
| 0  | 0  | 0  | 1 | 1 | 0 |
| 0  | 0  | 0  | 0 | 1 | 0 |
| 0  | 0  | 0  | 1 | 0 | 0 |
| 0  | 1  | 1  | 1 | 0 | 0 |
| 0  | 0  | 0  | 1 | 1 | 0 |
| 0  | 0  | 0  | 1 | 0 | 0 |
| 0  | 0  | 0  | 1 | 0 | 0 |
| 0  | 0  | 0  | 1 | 1 | 0 |
| 0  | 1  | 0  | 1 | 1 | 0 |
| 1  | 1  | 0  | 1 | 1 | 0 |
| 0  | 0  | 0  | 1 | 1 | 0 |
| 0  | 0  | 1  | 0 | 1 | 0 |
| 0  | 0  | 0  | 0 | 1 | 0 |
| 0  | 0  | 0  | 1 | 1 | 0 |
| 0  | 0  | 0  | 1 | 0 | 0 |
| 0  | 0  | 0  | 1 | 0 | 0 |
| 0  | 0  | 0  | 1 | 1 | 0 |
| 0  | 1  | 0  | 1 | 0 | 0 |
| 1  | 1  | 0  | 1 | 0 | 0 |
| 0  | 0  | 1  | 1 | 0 | 0 |
| 0  | 0  | 0  | 1 | 1 | 0 |
| 99 | 99 | 0  | 1 | 0 | 0 |
| 0  | 0  | 0  | 1 | 0 | 0 |
| 99 | 99 | 99 | 1 | 0 | 0 |
| 0  | 0  | 0  | 1 | 0 | 0 |
| 0  | 0  | 0  | 1 | 0 | 0 |
| 0  | 0  | 0  | 1 | 0 | 0 |
| 0  | 0  | 1  | 0 | 1 | 0 |
| 0  | 0  | 0  | 1 | 0 | 0 |
| 0  | 1  | 0  | 0 | 1 | 0 |
| 0  | 0  | 0  | 1 | 0 | 0 |
| 0  | 0  | 99 | 1 | 0 | 0 |
| 0  | 0  | 0  | 1 | 1 | 0 |
| 1  | 0  | 1  | 1 | 1 | 0 |
| 0  | 0  | 0  | 1 | 1 | 0 |

|    |    |    |   |   |   |
|----|----|----|---|---|---|
| 0  | 0  | 0  | 1 | 1 | 0 |
| 0  | 0  | 0  | 1 | 1 | 0 |
| 1  | 1  | 0  | 1 | 0 | 0 |
| 0  | 0  | 0  | 1 | 1 | 0 |
| 99 | 0  | 0  | 1 | 0 | 0 |
| 0  | 0  | 0  | 1 | 1 | 0 |
| 0  | 0  | 0  | 0 | 1 | 0 |
| 0  | 1  | 0  | 1 | 0 | 0 |
| 0  | 0  | 0  | 1 | 1 | 0 |
| 0  | 0  | 0  | 1 | 1 | 0 |
| 0  | 0  | 0  | 1 | 1 | 0 |
| 0  | 0  | 0  | 1 | 0 | 0 |
| 0  | 0  | 0  | 1 | 0 | 0 |
| 0  | 0  | 0  | 1 | 0 | 0 |
| 0  | 0  | 0  | 1 | 1 | 0 |
| 0  | 0  | 0  | 1 | 1 | 0 |
| 1  | 1  | 1  | 1 | 1 | 0 |
| 0  | 0  | 1  | 1 | 0 | 0 |
| 0  | 0  | 99 | 0 | 1 | 0 |
| 0  | 0  | 0  | 0 | 1 | 0 |
| 0  | 1  | 1  | 1 | 0 | 0 |
| 0  | 1  | 0  | 1 | 1 | 0 |
| 1  | 99 | 99 | 1 | 0 | 0 |
| 0  | 0  | 0  | 1 | 0 | 0 |
| 0  | 0  | 0  | 1 | 0 | 0 |
| 99 | 99 | 99 | 1 | 0 | 0 |
| 0  | 0  | 0  | 1 | 1 | 0 |
| 0  | 0  | 0  | 0 | 1 | 0 |
| 0  | 0  | 0  | 1 | 1 | 0 |
| 0  | 0  | 0  | 1 | 1 | 0 |
| 0  | 0  | 0  | 0 | 1 | 0 |
| 0  | 0  | 0  | 1 | 1 | 0 |
| 0  | 0  | 1  | 1 | 0 | 0 |
| 1  | 1  | 1  | 1 | 0 | 0 |
| 0  | 0  | 0  | 1 | 0 | 0 |
| 99 | 99 | 99 | 0 | 0 | 0 |
| 99 | 1  | 99 | 1 | 1 | 0 |
| 0  | 1  | 1  | 1 | 0 | 0 |
| 0  | 0  | 0  | 1 | 1 | 0 |
| 1  | 0  | 1  | 1 | 1 | 0 |
| 0  | 0  | 0  | 1 | 0 | 0 |
| 0  | 0  | 0  | 1 | 1 | 0 |
| 1  | 99 | 99 | 1 | 0 | 0 |
| 0  | 0  | 1  | 1 | 0 | 0 |
| 1  | 0  | 1  | 1 | 0 | 0 |
| 0  | 0  | 0  | 1 | 1 | 0 |



|    |    |    |   |   |   |
|----|----|----|---|---|---|
| 0  | 0  | 0  | 1 | 0 | 0 |
| 0  | 0  | 0  | 0 | 1 | 0 |
| 0  | 0  | 0  | 1 | 0 | 0 |
| 0  | 0  | 0  | 1 | 0 | 0 |
| 0  | 0  | 0  | 1 | 1 | 0 |
| 0  | 0  | 0  | 1 | 1 | 0 |
| 0  | 0  | 0  | 1 | 1 | 0 |
| 1  | 0  | 0  | 1 | 1 | 0 |
| 1  | 0  | 0  | 0 | 1 | 0 |
| 0  | 0  | 0  | 1 | 1 | 0 |
| 0  | 0  | 1  | 1 | 1 | 0 |
| 0  | 0  | 0  | 0 | 1 | 0 |
| 0  | 0  | 0  | 1 | 1 | 0 |
| 0  | 0  | 0  | 1 | 1 | 0 |
| 0  | 0  | 0  | 0 | 1 | 0 |
| 0  | 0  | 0  | 1 | 1 | 0 |
| 1  | 0  | 0  | 0 | 1 | 0 |
| 0  | 0  | 0  | 1 | 0 | 0 |
| 0  | 1  | 0  | 1 | 0 | 0 |
| 0  | 0  | 0  | 1 | 0 | 0 |
| 1  | 1  | 0  | 1 | 1 | 0 |
| 0  | 0  | 0  | 1 | 0 | 0 |
| 99 | 99 | 99 | 1 | 0 | 0 |
| 99 | 0  | 0  | 1 | 0 | 0 |
| 1  | 0  | 1  | 1 | 0 | 0 |
| 0  | 0  | 1  | 1 | 0 | 0 |
| 0  | 0  | 1  | 1 | 0 | 0 |
| 0  | 0  | 0  | 1 | 1 | 0 |
| 0  | 0  | 1  | 1 | 0 | 0 |
| 0  | 0  | 0  | 1 | 1 | 0 |
| 0  | 0  | 0  | 1 | 0 | 0 |
| 0  | 0  | 0  | 1 | 0 | 0 |
| 0  | 0  | 0  | 1 | 0 | 0 |
| 0  | 1  | 0  | 1 | 0 | 0 |
| 1  | 1  | 1  | 1 | 0 | 0 |
| 0  | 0  | 0  | 1 | 0 | 0 |
| 0  | 1  | 0  | 1 | 0 | 0 |
| 0  | 0  | 0  | 1 | 0 | 0 |
| 0  | 0  | 0  | 1 | 1 | 0 |
| 0  | 0  | 0  | 1 | 0 | 0 |
| 0  | 0  | 0  | 1 | 0 | 0 |
| 0  | 1  | 1  | 1 | 0 | 0 |
| 0  | 0  | 0  | 1 | 0 | 0 |
| 0  | 0  | 0  | 1 | 1 | 0 |
| 0  | 0  | 0  | 1 | 0 | 0 |
| 0  | 0  | 0  | 1 | 1 | 0 |
| 0  | 0  | 0  | 1 | 0 | 1 |
| 0  | 0  | 0  | 1 | 1 | 0 |
| 0  | 1  | 0  | 1 | 0 | 0 |

|    |    |    |   |   |   |
|----|----|----|---|---|---|
| 0  | 0  | 1  | 1 | 0 | 0 |
| 1  | 0  | 0  | 1 | 0 | 0 |
| 0  | 1  | 0  | 1 | 0 | 0 |
| 0  | 0  | 0  | 1 | 1 | 0 |
| 0  | 0  | 0  | 1 | 0 | 0 |
| 0  | 0  | 0  | 1 | 0 | 0 |
| 0  | 0  | 0  | 1 | 0 | 0 |
| 0  | 0  | 0  | 1 | 0 | 0 |
| 0  | 1  | 0  | 1 | 1 | 0 |
| 0  | 1  | 0  | 1 | 1 | 0 |
| 0  | 0  | 0  | 1 | 0 | 0 |
| 0  | 0  | 1  | 1 | 1 | 0 |
| 0  | 0  | 1  | 1 | 0 | 0 |
| 0  | 0  | 0  | 1 | 0 | 0 |
| 1  | 0  | 0  | 1 | 0 | 0 |
| 0  | 0  | 0  | 1 | 0 | 0 |
| 0  | 0  | 0  | 1 | 1 | 0 |
| 0  | 0  | 0  | 1 | 1 | 0 |
| 99 | 0  | 0  | 1 | 1 | 0 |
| 0  | 0  | 0  | 1 | 1 | 0 |
| 0  | 0  | 0  | 1 | 1 | 0 |
| 0  | 0  | 0  | 1 | 1 | 0 |
| 99 | 0  | 0  | 1 | 1 | 0 |
| 0  | 0  | 0  | 1 | 1 | 0 |
| 0  | 0  | 99 | 1 | 1 | 0 |
| 0  | 0  | 0  | 1 | 1 | 0 |
| 0  | 1  | 1  | 1 | 0 | 0 |
| 0  | 0  | 0  | 1 | 0 | 0 |
| 0  | 0  | 0  | 1 | 0 | 0 |
| 0  | 0  | 0  | 1 | 0 | 0 |
| 0  | 0  | 0  | 1 | 1 | 0 |
| 0  | 0  | 0  | 1 | 1 | 0 |
| 0  | 0  | 1  | 1 | 0 | 0 |
| 0  | 0  | 0  | 1 | 0 | 0 |
| 0  | 0  | 0  | 1 | 0 | 0 |
| 0  | 0  | 0  | 1 | 1 | 0 |
| 0  | 1  | 0  | 1 | 0 | 0 |
| 0  | 0  | 0  | 1 | 1 | 0 |
| 0  | 0  | 0  | 0 | 1 | 0 |
| 0  | 0  | 0  | 0 | 1 | 0 |
| 1  | 1  | 1  | 1 | 1 | 0 |
| 0  | 0  | 0  | 1 | 0 | 0 |
| 0  | 0  | 0  | 0 | 1 | 0 |
| 1  | 1  | 1  | 1 | 1 | 0 |
| 0  | 0  | 0  | 1 | 0 | 0 |
| 0  | 99 | 0  | 1 | 1 | 0 |

|    |    |    |   |   |   |
|----|----|----|---|---|---|
| 0  | 0  | 0  | 0 | 1 | 0 |
| 0  | 0  | 0  | 1 | 1 | 0 |
| 0  | 0  | 0  | 1 | 1 | 0 |
| 0  | 0  | 0  | 1 | 0 | 0 |
| 0  | 0  | 1  | 1 | 0 | 0 |
| 0  | 0  | 0  | 1 | 0 | 0 |
| 0  | 0  | 0  | 1 | 0 | 0 |
| 99 | 1  | 0  | 1 | 0 | 0 |
| 1  | 99 | 1  | 1 | 1 | 0 |
| 99 | 99 | 99 | 1 | 0 | 0 |
| 1  | 1  | 1  | 1 | 0 | 0 |
| 0  | 0  | 0  | 1 | 1 | 0 |
| 0  | 0  | 0  | 1 | 0 | 0 |
| 0  | 0  | 0  | 1 | 1 | 0 |
| 0  | 0  | 0  | 1 | 0 | 0 |
| 1  | 0  | 1  | 1 | 0 | 0 |
| 0  | 0  | 0  | 1 | 1 | 0 |
| 1  | 1  | 1  | 1 | 0 | 0 |
| 1  | 1  | 0  | 1 | 0 | 0 |
| 0  | 0  | 0  | 1 | 0 | 0 |
| 1  | 1  | 0  | 1 | 0 | 0 |
| 0  | 0  | 0  | 1 | 1 | 0 |
| 99 | 99 | 0  | 1 | 1 | 0 |
| 0  | 1  | 0  | 1 | 0 | 0 |
| 0  | 0  | 0  | 1 | 0 | 0 |
| 0  | 0  | 0  | 1 | 0 | 0 |
| 0  | 0  | 0  | 1 | 1 | 0 |
| 99 | 99 | 99 | 1 | 0 | 0 |
| 0  | 0  | 0  | 1 | 1 | 0 |
| 0  | 0  | 0  | 1 | 0 | 0 |
| 99 | 99 | 99 | 1 | 0 | 0 |
| 0  | 0  | 0  | 1 | 1 | 0 |
| 1  | 1  | 0  | 1 | 0 | 0 |
| 0  | 0  | 0  | 1 | 1 | 0 |
| 0  | 0  | 99 | 0 | 1 | 0 |
| 0  | 0  | 0  | 1 | 1 | 0 |
| 1  | 1  | 0  | 1 | 0 | 0 |
| 0  | 0  | 0  | 1 | 1 | 0 |
| 0  | 0  | 0  | 1 | 1 | 0 |
| 99 | 0  | 0  | 1 | 1 | 0 |
| 99 | 0  | 0  | 0 | 1 | 0 |
| 1  | 1  | 1  | 1 | 0 | 0 |
| 0  | 0  | 0  | 1 | 1 | 0 |
| 0  | 0  | 0  | 1 | 1 | 0 |
| 0  | 0  | 0  | 1 | 0 | 0 |
| 0  | 0  | 0  | 0 | 1 | 0 |
| 0  | 1  | 0  | 1 | 1 | 0 |

|    |    |    |   |   |   |
|----|----|----|---|---|---|
| 0  | 0  | 0  | 1 | 1 | 0 |
| 1  | 1  | 1  | 1 | 0 | 0 |
| 0  | 0  | 0  | 0 | 1 | 0 |
| 0  | 0  | 0  | 1 | 1 | 0 |
| 1  | 0  | 1  | 1 | 0 | 0 |
| 0  | 0  | 0  | 0 | 1 | 0 |
| 1  | 1  | 1  | 1 | 0 | 0 |
| 0  | 0  | 0  | 1 | 1 | 0 |
| 0  | 0  | 0  | 1 | 1 | 0 |
| 1  | 0  | 1  | 1 | 1 | 0 |
| 0  | 0  | 0  | 1 | 0 | 0 |
| 1  | 1  | 1  | 1 | 0 | 0 |
| 0  | 0  | 0  | 1 | 1 | 0 |
| 0  | 0  | 0  | 1 | 1 | 0 |
| 1  | 0  | 0  | 1 | 0 | 0 |
| 1  | 99 | 99 | 1 | 0 | 0 |
| 0  | 0  | 0  | 0 | 1 | 0 |
| 0  | 1  | 0  | 1 | 0 | 0 |
| 0  | 0  | 1  | 1 | 0 | 0 |
| 0  | 1  | 1  | 1 | 1 | 0 |
| 0  | 1  | 0  | 1 | 0 | 0 |
| 0  | 0  | 0  | 1 | 0 | 0 |
| 0  | 0  | 1  | 1 | 1 | 0 |
| 0  | 0  | 0  | 1 | 1 | 0 |
| 0  | 0  | 0  | 1 | 1 | 0 |
| 1  | 0  | 0  | 1 | 0 | 0 |
| 0  | 0  | 0  | 1 | 1 | 0 |
| 0  | 0  | 0  | 1 | 1 | 0 |
| 0  | 0  | 0  | 1 | 0 | 0 |
| 0  | 1  | 0  | 1 | 0 | 0 |
| 0  | 0  | 99 | 1 | 0 | 0 |
| 0  | 0  | 0  | 1 | 0 | 0 |
| 99 | 99 | 99 | 1 | 0 | 0 |
| 0  | 0  | 0  | 0 | 1 | 0 |
| 0  | 1  | 0  | 1 | 0 | 0 |
| 0  | 0  | 0  | 1 | 1 | 0 |
| 0  | 0  | 0  | 1 | 1 | 0 |
| 0  | 0  | 0  | 1 | 1 | 0 |
| 0  | 0  | 0  | 1 | 0 | 0 |
| 1  | 1  | 1  | 1 | 0 | 0 |
| 1  | 1  | 0  | 1 | 1 | 0 |
| 0  | 1  | 1  | 1 | 0 | 0 |
| 1  | 0  | 0  | 1 | 1 | 0 |
| 0  | 0  | 0  | 1 | 1 | 0 |
| 99 | 99 | 99 | 1 | 0 | 0 |

|    |    |    |   |   |   |
|----|----|----|---|---|---|
| 0  | 0  | 0  | 1 | 0 | 0 |
| 0  | 0  | 1  | 1 | 0 | 0 |
| 0  | 0  | 0  | 1 | 0 | 0 |
| 0  | 0  | 0  | 1 | 0 | 0 |
| 1  | 1  | 0  | 1 | 0 | 0 |
| 1  | 0  | 0  | 1 | 0 | 0 |
| 0  | 0  | 0  | 1 | 0 | 0 |
| 0  | 0  | 0  | 1 | 0 | 0 |
| 0  | 0  | 0  | 1 | 0 | 0 |
| 0  | 0  | 0  | 1 | 1 | 0 |
| 0  | 0  | 0  | 1 | 1 | 0 |
| 0  | 0  | 1  | 1 | 0 | 0 |
| 1  | 1  | 0  | 1 | 1 | 0 |
| 0  | 0  | 0  | 1 | 1 | 0 |
| 0  | 0  | 0  | 1 | 0 | 0 |
| 0  | 0  | 0  | 1 | 0 | 0 |
| 0  | 0  | 0  | 1 | 1 | 0 |
| 0  | 0  | 0  | 1 | 1 | 0 |
| 0  | 0  | 0  | 1 | 1 | 0 |
| 0  | 0  | 0  | 1 | 1 | 0 |
| 99 | 0  | 99 | 0 | 1 | 0 |
| 0  | 0  | 0  | 0 | 1 | 0 |
| 1  | 1  | 1  | 1 | 1 | 0 |
| 1  | 0  | 0  | 1 | 0 | 0 |
| 0  | 0  | 0  | 1 | 1 | 0 |
| 0  | 0  | 0  | 1 | 1 | 0 |
| 0  | 0  | 0  | 1 | 1 | 0 |
| 0  | 0  | 0  | 1 | 1 | 0 |
| 0  | 99 | 0  | 1 | 1 | 0 |
| 1  | 0  | 0  | 1 | 1 | 0 |
| 0  | 0  | 0  | 1 | 0 | 0 |
| 0  | 1  | 1  | 0 | 0 | 0 |
| 1  | 0  | 1  | 1 | 0 | 0 |
| 0  | 0  | 0  | 1 | 0 | 0 |
| 0  | 99 | 0  | 1 | 1 | 0 |
| 0  | 0  | 0  | 0 | 1 | 0 |
| 0  | 0  | 0  | 1 | 1 | 0 |
| 0  | 0  | 0  | 0 | 1 | 0 |
| 0  | 0  | 0  | 1 | 1 | 0 |
| 0  | 0  | 0  | 1 | 1 | 0 |
| 0  | 0  | 0  | 1 | 1 | 0 |
| 0  | 0  | 0  | 1 | 1 | 0 |
| 0  | 0  | 0  | 1 | 1 | 0 |
| 0  | 0  | 0  | 1 | 1 | 0 |
| 1  | 0  | 0  | 1 | 1 | 0 |
| 0  | 0  | 0  | 1 | 1 | 0 |
| 0  | 1  | 1  | 1 | 0 | 0 |
| 0  | 0  | 99 | 1 | 0 | 0 |
| 0  | 1  | 0  | 1 | 0 | 0 |
| 1  | 1  | 0  | 1 | 0 | 0 |
| 0  | 0  | 0  | 1 | 0 | 0 |
| 1  | 0  | 1  | 1 | 1 | 0 |

|    |    |    |   |   |   |
|----|----|----|---|---|---|
| 99 | 0  | 0  | 1 | 0 | 0 |
| 0  | 0  | 0  | 1 | 1 | 0 |
| 0  | 0  | 0  | 1 | 0 | 0 |
| 0  | 1  | 0  | 1 | 1 | 0 |
| 0  | 0  | 0  | 1 | 1 | 0 |
| 99 | 0  | 99 | 0 | 1 | 0 |
| 0  | 0  | 0  | 1 | 0 | 0 |
| 0  | 0  | 0  | 1 | 0 | 0 |
| 0  | 0  | 0  | 1 | 1 | 0 |
| 0  | 0  | 0  | 1 | 1 | 0 |
| 0  | 0  | 0  | 1 | 0 | 0 |
| 1  | 0  | 1  | 1 | 0 | 0 |
| 0  | 0  | 0  | 1 | 1 | 0 |
| 1  | 1  | 1  | 1 | 1 | 0 |
| 0  | 0  | 0  | 1 | 0 | 0 |
| 0  | 0  | 0  | 1 | 0 | 0 |
| 1  | 0  | 1  | 1 | 0 | 0 |
| 0  | 0  | 0  | 1 | 1 | 0 |
| 99 | 99 | 99 | 1 | 1 | 0 |
| 0  | 0  | 0  | 1 | 1 | 0 |
| 1  | 0  | 0  | 1 | 0 | 0 |
| 0  | 0  | 0  | 1 | 1 | 0 |
| 0  | 1  | 0  | 1 | 0 | 0 |
| 0  | 0  | 0  | 1 | 0 | 0 |
| 0  | 0  | 0  | 1 | 0 | 0 |
| 1  | 1  | 1  | 1 | 0 | 0 |
| 0  | 0  | 0  | 1 | 1 | 0 |
| 0  | 0  | 1  | 0 | 1 | 0 |
| 0  | 0  | 99 | 1 | 0 | 0 |
| 0  | 1  | 0  | 1 | 1 | 0 |
| 1  | 1  | 1  | 1 | 1 | 0 |
| 1  | 1  | 99 | 1 | 1 | 0 |
| 0  | 1  | 0  | 1 | 1 | 0 |
| 0  | 0  | 0  | 1 | 0 | 0 |
| 1  | 0  | 0  | 1 | 0 | 0 |
| 0  | 0  | 0  | 1 | 1 | 0 |
| 0  | 0  | 0  | 1 | 1 | 0 |
| 0  | 0  | 0  | 1 | 1 | 0 |
| 0  | 0  | 0  | 1 | 1 | 0 |
| 0  | 0  | 1  | 0 | 1 | 0 |
| 0  | 0  | 0  | 1 | 1 | 0 |
| 1  | 1  | 0  | 0 | 1 | 0 |
| 1  | 0  | 0  | 1 | 0 | 0 |
| 0  | 0  | 0  | 1 | 1 | 0 |
| 1  | 0  | 1  | 1 | 1 | 0 |
| 0  | 0  | 0  | 1 | 0 | 0 |
| 1  | 0  | 0  | 1 | 0 | 0 |
| 0  | 0  | 0  | 1 | 1 | 0 |



|    |   |    |   |   |   |
|----|---|----|---|---|---|
| 0  | 0 | 0  | 1 | 0 | 0 |
| 0  | 0 | 0  | 1 | 1 | 0 |
| 0  | 0 | 0  | 1 | 0 | 0 |
| 0  | 0 | 0  | 0 | 1 | 0 |
| 0  | 0 | 0  | 1 | 1 | 0 |
| 0  | 0 | 0  | 1 | 1 | 0 |
| 0  | 0 | 0  | 1 | 1 | 0 |
| 0  | 1 | 99 | 1 | 0 | 0 |
| 0  | 0 | 0  | 1 | 0 | 0 |
| 0  | 0 | 1  | 1 | 0 | 0 |
| 0  | 1 | 1  | 1 | 1 | 0 |
| 0  | 0 | 0  | 1 | 1 | 0 |
| 0  | 0 | 0  | 0 | 1 | 0 |
| 0  | 0 | 0  | 1 | 1 | 0 |
| 1  | 1 | 0  | 1 | 0 | 0 |
| 0  | 0 | 0  | 1 | 0 | 0 |
| 1  | 1 | 1  | 1 | 0 | 0 |
| 0  | 0 | 0  | 1 | 1 | 0 |
| 0  | 0 | 0  | 1 | 1 | 0 |
| 0  | 0 | 0  | 1 | 1 | 0 |
| 0  | 0 | 0  | 0 | 1 | 0 |
| 0  | 0 | 0  | 1 | 1 | 0 |
| 1  | 0 | 1  | 1 | 1 | 0 |
| 0  | 1 | 0  | 1 | 0 | 0 |
| 0  | 0 | 0  | 1 | 1 | 0 |
| 0  | 1 | 0  | 1 | 1 | 0 |
| 0  | 0 | 0  | 1 | 0 | 0 |
| 0  | 0 | 0  | 1 | 0 | 0 |
| 0  | 0 | 0  | 1 | 1 | 0 |
| 0  | 0 | 0  | 1 | 1 | 0 |
| 0  | 0 | 0  | 1 | 0 | 0 |
| 0  | 0 | 0  | 1 | 1 | 0 |
| 0  | 0 | 0  | 1 | 1 | 0 |
| 0  | 0 | 0  | 1 | 0 | 0 |
| 1  | 0 | 0  | 1 | 1 | 0 |
| 0  | 0 | 0  | 0 | 1 | 0 |
| 0  | 0 | 0  | 1 | 0 | 0 |
| 0  | 0 | 0  | 1 | 0 | 0 |
| 0  | 0 | 0  | 1 | 1 | 0 |
| 0  | 0 | 0  | 1 | 0 | 0 |
| 0  | 0 | 0  | 1 | 0 | 0 |
| 0  | 0 | 0  | 1 | 1 | 0 |
| 0  | 0 | 0  | 1 | 0 | 0 |
| 0  | 0 | 0  | 1 | 0 | 0 |
| 0  | 0 | 0  | 1 | 1 | 0 |
| 99 | 1 | 99 | 1 | 0 | 0 |
| 0  | 0 | 0  | 1 | 0 | 0 |
| 0  | 1 | 0  | 1 | 1 | 0 |
| 99 | 1 | 99 | 1 | 0 | 0 |
| 0  | 0 | 0  | 1 | 0 | 0 |
| 1  | 0 | 99 | 1 | 1 | 0 |
| 1  | 0 | 0  | 1 | 1 | 0 |



|    |    |    |   |   |   |
|----|----|----|---|---|---|
| 0  | 0  | 1  | 1 | 0 | 0 |
| 0  | 0  | 0  | 0 | 1 | 0 |
| 0  | 0  | 0  | 1 | 0 | 0 |
| 0  | 1  | 0  | 1 | 0 | 0 |
| 0  | 0  | 0  | 1 | 0 | 0 |
| 0  | 0  | 0  | 1 | 1 | 0 |
| 0  | 0  | 0  | 1 | 0 | 0 |
| 0  | 0  | 0  | 1 | 1 | 0 |
| 0  | 0  | 0  | 1 | 0 | 0 |
| 0  | 0  | 0  | 1 | 1 | 0 |
| 0  | 0  | 0  | 1 | 0 | 0 |
| 0  | 0  | 0  | 1 | 1 | 0 |
| 99 | 99 | 99 | 1 | 1 | 1 |
| 0  | 1  | 0  | 1 | 0 | 0 |
| 1  | 0  | 99 | 1 | 0 | 0 |
| 0  | 0  | 0  | 1 | 1 | 0 |
| 0  | 1  | 0  | 1 | 1 | 0 |
| 1  | 1  | 0  | 1 | 0 | 0 |
| 0  | 0  | 0  | 1 | 0 | 0 |
| 1  | 1  | 1  | 1 | 0 | 0 |
| 0  | 0  | 0  | 1 | 0 | 0 |
| 0  | 0  | 0  | 1 | 0 | 0 |
| 0  | 0  | 0  | 1 | 0 | 0 |
| 1  | 0  | 0  | 1 | 1 | 0 |
| 0  | 0  | 0  | 1 | 0 | 0 |
| 0  | 0  | 0  | 1 | 1 | 0 |
| 0  | 0  | 0  | 1 | 1 | 0 |
| 0  | 0  | 0  | 1 | 0 | 0 |
| 0  | 0  | 0  | 1 | 1 | 0 |
| 0  | 0  | 0  | 1 | 0 | 0 |
| 0  | 0  | 0  | 1 | 1 | 0 |
| 0  | 0  | 0  | 1 | 0 | 0 |
| 0  | 0  | 0  | 1 | 1 | 0 |
| 0  | 0  | 0  | 1 | 0 | 0 |
| 0  | 0  | 0  | 1 | 1 | 0 |
| 0  | 0  | 0  | 1 | 0 | 0 |
| 0  | 0  | 0  | 1 | 1 | 0 |
| 0  | 0  | 1  | 1 | 0 | 0 |
| 0  | 0  | 0  | 1 | 1 | 0 |
| 1  | 1  | 0  | 1 | 0 | 0 |
| 0  | 1  | 99 | 1 | 1 | 0 |
| 99 | 99 | 99 | 1 | 0 | 0 |
| 1  | 0  | 1  | 1 | 1 | 0 |
| 0  | 0  | 0  | 0 | 1 | 0 |
| 1  | 1  | 0  | 1 | 0 | 0 |
| 0  | 0  | 0  | 1 | 0 | 0 |
| 0  | 0  | 0  | 1 | 0 | 0 |
| 0  | 0  | 0  | 1 | 1 | 0 |
| 0  | 0  | 0  | 1 | 0 | 0 |
| 1  | 1  | 1  | 1 | 0 | 0 |
| 0  | 0  | 0  | 0 | 1 | 0 |
| 1  | 1  | 0  | 1 | 0 | 0 |
| 0  | 0  | 0  | 1 | 1 | 0 |
| 0  | 0  | 0  | 1 | 1 | 0 |
| 1  | 0  | 1  | 1 | 1 | 0 |

|    |   |    |   |   |   |
|----|---|----|---|---|---|
| 0  | 0 | 0  | 1 | 0 | 0 |
| 0  | 0 | 1  | 1 | 0 | 0 |
| 0  | 0 | 0  | 1 | 0 | 0 |
| 0  | 0 | 0  | 1 | 0 | 0 |
| 0  | 0 | 0  | 1 | 1 | 0 |
| 0  | 0 | 1  | 0 | 1 | 0 |
| 1  | 0 | 1  | 1 | 0 | 0 |
| 0  | 0 | 0  | 1 | 0 | 0 |
| 0  | 0 | 0  | 1 | 0 | 0 |
| 0  | 0 | 0  | 1 | 0 | 0 |
| 0  | 1 | 0  | 1 | 1 | 0 |
| 0  | 1 | 0  | 1 | 0 | 0 |
| 0  | 0 | 0  | 1 | 0 | 0 |
| 0  | 0 | 0  | 1 | 0 | 0 |
| 0  | 0 | 0  | 1 | 0 | 0 |
| 0  | 0 | 0  | 1 | 1 | 0 |
| 0  | 0 | 0  | 1 | 1 | 0 |
| 0  | 0 | 0  | 1 | 1 | 0 |
| 0  | 0 | 0  | 1 | 1 | 0 |
| 0  | 0 | 0  | 1 | 1 | 0 |
| 0  | 0 | 0  | 1 | 1 | 0 |
| 0  | 0 | 0  | 1 | 1 | 0 |
| 0  | 0 | 0  | 1 | 1 | 0 |
| 0  | 0 | 0  | 1 | 1 | 0 |
| 1  | 0 | 1  | 1 | 1 | 0 |
| 0  | 0 | 0  | 1 | 1 | 0 |
| 0  | 0 | 0  | 1 | 1 | 0 |
| 0  | 0 | 0  | 1 | 0 | 0 |
| 1  | 1 | 1  | 1 | 0 | 0 |
| 0  | 1 | 0  | 1 | 0 | 0 |
| 99 | 1 | 99 | 1 | 0 | 0 |
| 0  | 0 | 0  | 1 | 1 | 0 |
| 0  | 0 | 0  | 1 | 0 | 0 |
| 0  | 0 | 0  | 1 | 1 | 0 |
| 0  | 0 | 1  | 1 | 1 | 0 |
| 0  | 0 | 0  | 1 | 0 | 0 |
| 0  | 0 | 99 | 1 | 0 | 0 |
| 0  | 1 | 0  | 1 | 0 | 0 |
| 0  | 0 | 0  | 1 | 1 | 0 |
| 0  | 0 | 1  | 0 | 1 | 0 |
| 0  | 0 | 0  | 1 | 0 | 0 |
| 0  | 0 | 0  | 1 | 1 | 0 |
| 0  | 0 | 0  | 1 | 0 | 0 |
| 0  | 1 | 1  | 1 | 0 | 0 |
| 0  | 0 | 0  | 1 | 1 | 0 |
| 0  | 1 | 0  | 1 | 0 | 0 |
| 1  | 1 | 0  | 1 | 0 | 0 |
| 0  | 0 | 0  | 1 | 1 | 0 |
| 1  | 1 | 1  | 0 | 1 | 0 |
| 1  | 0 | 0  | 1 | 0 | 0 |
| 0  | 0 | 0  | 1 | 0 | 0 |

|    |    |    |   |   |   |
|----|----|----|---|---|---|
| 0  | 0  | 0  | 1 | 0 | 0 |
| 0  | 1  | 99 | 1 | 0 | 0 |
| 0  | 0  | 0  | 1 | 1 | 0 |
| 0  | 0  | 0  | 1 | 0 | 0 |
| 0  | 0  | 0  | 1 | 0 | 0 |
| 0  | 1  | 1  | 1 | 0 | 0 |
| 0  | 0  | 0  | 1 | 1 | 0 |
| 0  | 0  | 0  | 1 | 1 | 0 |
| 1  | 0  | 0  | 1 | 1 | 0 |
| 0  | 1  | 0  | 1 | 1 | 0 |
| 99 | 0  | 99 | 1 | 0 | 0 |
| 1  | 99 | 1  | 1 | 0 | 0 |
| 0  | 0  | 0  | 1 | 0 | 0 |
| 0  | 0  | 0  | 1 | 1 | 0 |
| 0  | 1  | 0  | 0 | 0 | 0 |
| 0  | 0  | 0  | 0 | 1 | 0 |
| 0  | 1  | 1  | 1 | 0 | 0 |
| 0  | 1  | 0  | 1 | 1 | 0 |
| 0  | 0  | 99 | 0 | 1 | 0 |
| 0  | 0  | 0  | 1 | 1 | 0 |
| 1  | 1  | 0  | 1 | 1 | 0 |
| 0  | 0  | 0  | 1 | 0 | 0 |
| 0  | 0  | 0  | 1 | 1 | 0 |
| 0  | 0  | 1  | 1 | 1 | 0 |
| 0  | 0  | 0  | 1 | 1 | 0 |
| 0  | 0  | 0  | 1 | 1 | 0 |
| 0  | 0  | 0  | 1 | 1 | 0 |
| 0  | 0  | 0  | 1 | 1 | 0 |
| 0  | 0  | 0  | 1 | 1 | 0 |
| 0  | 0  | 0  | 1 | 1 | 0 |
| 0  | 0  | 0  | 1 | 1 | 0 |
| 0  | 1  | 0  | 0 | 1 | 0 |
| 0  | 0  | 0  | 1 | 0 | 0 |
| 1  | 0  | 0  | 1 | 0 | 0 |
| 1  | 0  | 0  | 1 | 0 | 0 |
| 0  | 1  | 0  | 1 | 1 | 0 |
| 0  | 0  | 0  | 1 | 0 | 0 |
| 0  | 0  | 0  | 1 | 1 | 0 |
| 0  | 0  | 0  | 1 | 0 | 0 |
| 0  | 1  | 1  | 1 | 0 | 0 |
| 0  | 0  | 0  | 1 | 0 | 0 |
| 0  | 0  | 0  | 1 | 0 | 0 |
| 1  | 1  | 1  | 1 | 0 | 0 |
| 0  | 0  | 0  | 1 | 1 | 0 |
| 0  | 0  | 0  | 1 | 0 | 0 |
| 1  | 1  | 0  | 1 | 0 | 0 |
| 0  | 0  | 0  | 1 | 1 | 0 |
| 0  | 0  | 0  | 1 | 0 | 0 |

|   |   |        |   |   |   |
|---|---|--------|---|---|---|
| 0 | 0 | 0      | 1 | 0 | 0 |
| 1 | 0 | 0      | 1 | 1 | 0 |
| 0 | 0 | 0      | 1 | 1 | 0 |
| 0 | 0 | 0      | 1 | 1 | 0 |
| 0 | 0 | 0      | 1 | 0 | 0 |
| 0 | 0 | 0      | 1 | 0 | 0 |
| 1 | 0 | 1      | 1 | 1 | 0 |
| 1 | 1 | 0      | 1 | 0 | 0 |
| 1 | 1 | 0      | 0 | 0 | 0 |
| 0 | 0 | 0      | 1 | 1 | 0 |
| 0 | 0 | 0      | 1 | 0 | 0 |
| 0 | 0 | 0      | 1 | 0 | 0 |
| 0 | 0 | 0      | 1 | 0 | 0 |
| 0 | 0 | 0      | 1 | 0 | 0 |
| 0 | 0 | 0      | 1 | 0 | 0 |
| 0 | 0 | 0      | 1 | 0 | 0 |
| 0 | 0 | 0      | 1 | 0 | 0 |
| 0 | 0 | 0      | 1 | 0 | 0 |
| 0 | 0 | 0      | 1 | 1 | 0 |
| 0 | 0 | 0      | 1 | 1 | 0 |
| 0 | 0 | 0      | 1 | 0 | 0 |
| 0 | 0 | 0      | 1 | 0 | 0 |
| 0 | 0 | 0      | 1 | 1 | 0 |
| 0 | 0 | 0      | 1 | 1 | 0 |
| 0 | 0 | 0      | 1 | 0 | 0 |
| 0 | 0 | 0      | 1 | 0 | 0 |
| 0 | 0 | 0      | 1 | 0 | 0 |
| 0 | 0 | 0      | 1 | 0 | 0 |
| 0 | 0 | 0      | 1 | 0 | 0 |
| 1 | 1 | 0      | 1 | 0 | 0 |
| 0 | 0 | 0      | 1 | 1 | 0 |
| 0 | 0 | 0      | 1 | 1 | 0 |
| 0 | 0 | 0      | 1 | 1 | 0 |
| 0 | 0 | 0      | 1 | 1 | 0 |
| 0 | 0 | 0      | 1 | 1 | 0 |
| 0 | 0 | 0      | 1 | 1 | 0 |
| 0 | 0 | 0      | 1 | 1 | 0 |
| 1 | 0 | 0      | 1 | 0 | 0 |
| 0 | 0 | 1      | 1 | 0 | 0 |
| 0 | 0 | 0      | 0 | 1 | 0 |
| 0 | 0 | 1      | 1 | 1 | 0 |
| 0 | 0 | 0      | 1 | 1 | 0 |
| 0 | 0 | 0      | 0 | 0 | 1 |
| 0 | 0 | 0      | 0 | 1 | 0 |
| 0 | 0 | 0      | 1 | 0 | 0 |
| 0 | 0 | 0      | 0 | 1 | 0 |
| 0 | 0 | 0      | 0 | 1 | 0 |
| 0 | 0 | 0      | 0 | 1 | 0 |
| 0 | 0 | 0      | 0 | 1 | 0 |
| 0 | 0 | 0      | 0 | 1 | 0 |
| 0 | 0 | 0      | 0 | 1 | 0 |
| 0 | 0 | 0      | 1 | 0 | 0 |
| 0 | 0 | 0      | 1 | 0 | 0 |
| 0 | 0 | 0      | 0 | 0 | 0 |
| 0 | 0 | #NULL! | 1 | 0 | 0 |
| 0 | 0 | 0      | 1 | 0 | 0 |
| 0 | 0 | 0      | 1 | 0 | 0 |
| 0 | 0 | 0      | 0 | 1 | 0 |

|        |        |        |   |   |   |
|--------|--------|--------|---|---|---|
| 0      | 0      | 0      | 1 | 1 | 0 |
| 1      | 0      | 0      | 1 | 0 | 0 |
| 0      | 0      | 0      | 1 | 0 | 0 |
| 1      | 0      | 1      | 1 | 0 | 0 |
| 0      | 0      | 0      | 1 | 0 | 0 |
| 0      | 0      | 0      | 1 | 0 | 0 |
| 0      | 1      | 1      | 1 | 0 | 0 |
| 0      | 0      | 0      | 1 | 0 | 0 |
| 0      | 0      | 0      | 1 | 1 | 0 |
| 0      | 0      | 0      | 1 | 0 | 0 |
| 0      | 0      | 0      | 0 | 1 | 0 |
| 0      | 0      | 0      | 1 | 0 | 0 |
| 1      | 1      | 1      | 1 | 0 | 0 |
| #NULL! | #NULL! | #NULL! | 0 | 0 | 0 |
| 1      | 0      | 0      | 1 | 0 | 0 |
| 0      | 0      | 0      | 1 | 0 | 0 |
| 0      | 0      | #NULL! | 1 | 1 | 0 |
| 0      | 0      | 0      | 1 | 0 | 0 |
| 0      | 0      | 0      | 1 | 1 | 0 |
| 0      | 0      | 0      | 0 | 1 | 0 |
| 0      | 0      | 0      | 1 | 1 | 0 |
| 0      | 0      | #NULL! | 1 | 1 | 0 |
| 0      | 0      | 0      | 1 | 1 | 0 |
| 0      | 0      | 0      | 0 | 1 | 0 |
| 0      | 0      | 0      | 1 | 1 | 0 |
| 0      | 0      | 0      | 0 | 0 | 0 |
| 0      | 0      | 0      | 1 | 1 | 0 |
| 0      | 0      | 0      | 1 | 0 | 0 |
| 0      | 0      | 0      | 1 | 1 | 0 |
| 0      | 0      | 0      | 1 | 1 | 0 |
| 0      | 0      | 0      | 1 | 1 | 0 |
| 0      | 0      | #NULL! | 1 | 0 | 0 |
| 0      | 1      | 0      | 1 | 0 | 0 |
| 0      | 0      | 0      | 1 | 1 | 0 |
| 0      | 0      | 0      | 1 | 0 | 0 |
| 0      | 0      | #NULL! | 0 | 1 | 0 |
| 0      | 0      | #NULL! | 1 | 0 | 0 |
| 0      | 0      | 0      | 1 | 1 | 0 |
| 0      | 0      | 0      | 1 | 1 | 0 |
| 0      | 1      | 0      | 1 | 0 | 0 |
| 0      | 0      | 0      | 0 | 1 | 0 |
| 0      | 0      | 0      | 1 | 1 | 0 |
| 0      | 0      | 0      | 0 | 1 | 0 |
| 0      | 0      | 0      | 1 | 0 | 0 |
| 0      | 1      | 1      | 1 | 0 | 0 |
| 0      | 0      | 1      | 1 | 0 | 0 |
| 0      | 0      | 0      | 1 | 1 | 0 |
| 0      | 0      | 0      | 1 | 1 | 0 |

|        |   |   |        |   |   |   |
|--------|---|---|--------|---|---|---|
|        | 0 | 1 | 0      | 1 | 0 | 0 |
|        | 0 | 1 | 1      | 1 | 1 | 0 |
|        | 0 | 0 | 1      | 1 | 0 | 0 |
|        | 0 | 0 | 0      | 0 | 0 | 0 |
|        | 0 | 1 | 0      | 1 | 1 | 0 |
|        | 0 | 0 | 0      | 1 | 1 | 0 |
|        | 0 | 1 | 0      | 1 | 1 | 0 |
|        | 0 | 0 | 0      | 1 | 1 | 0 |
|        | 0 | 0 | 0      | 1 | 1 | 0 |
|        | 0 | 0 | 0      | 1 | 0 | 0 |
|        | 0 | 1 | 0      | 1 | 0 | 0 |
|        | 0 | 0 | 0      | 1 | 0 | 0 |
|        | 0 | 0 | 0      | 1 | 0 | 0 |
|        | 0 | 0 | 0      | 1 | 0 | 0 |
|        | 1 | 0 | 0      | 1 | 0 | 0 |
|        | 0 | 0 | 0      | 0 | 1 | 0 |
|        | 0 | 0 | 0      | 1 | 1 | 0 |
|        | 0 | 0 | 0      | 1 | 1 | 0 |
| #NULL! |   |   | #NULL! | 0 | 0 | 0 |
|        | 1 | 0 | 1      | 1 | 0 | 0 |
|        | 0 | 1 | 0      | 1 | 0 | 0 |
|        | 0 | 0 | 0      | 1 | 1 | 0 |
|        | 0 | 0 | 0      | 1 | 1 | 0 |

| language_pre__4 | language_pre__5 | other_language_pre | langa_pre | langb_pre | subusea_pre | subuseb_pre |
|-----------------|-----------------|--------------------|-----------|-----------|-------------|-------------|
| 0               | 0               | #NULL!             | 3         | 2         | 0           | 0           |
| 0               | 0               | #NULL!             | 3         | 3         | 0           | 0           |
| 0               | 0               | #NULL!             | 3         | 1         | 0           | 0           |
| 0               | 0               | #NULL!             | 1         | 1         | 0           | 0           |
| 0               | 0               | #NULL!             | 1         | 1         | 0           | 0           |
| 0               | 0               | #NULL!             | 4         | 1         | 0           | 0           |
| 0               | 0               | #NULL!             | 2         | 1         | 3           | 4           |
| 0               | 0               | #NULL!             | 3         | 3         | 0           | 99          |
| 0               | 0               | #NULL!             | 3         | 3         | 99          | 99          |
| 0               | 0               | #NULL!             | 1         | 1         | 0           | 1           |
| 0               | 0               | #NULL!             | 1         | 1         | 0           | 0           |
| 0               | 0               | #NULL!             | 1         | 1         | 1           | 0           |
| 0               | 0               | #NULL!             | 1         | 1         | 0           | 1           |
| 0               | 0               | #NULL!             | 1         | 1         | 0           | 0           |
| 0               | 0               | #NULL!             | 1         | 2         | 0           | 0           |
| 0               | 0               | #NULL!             | 5         | 2         | 0           | 0           |
| 0               | 0               | #NULL!             | 3         | 1         | 0           | 0           |
| 0               | 0               | #NULL!             | 2         | 3         | 0           | 99          |
| 0               | 0               | #NULL!             | 3         | 1         | 0           | 0           |
| 0               | 0               | #NULL!             | 1         | 2         | 2           | 1           |
| 0               | 0               | #NULL!             | 3         | 2         | 0           | 99          |
| 0               | 1               | #NULL!             | 99        | 99        | 0           | 0           |
| 0               | 0               | #NULL!             | 3         | 3         | 0           | 0           |
| 0               | 0               | #NULL!             | 4         | 2         | 0           | 0           |
| 0               | 0               | #NULL!             | 3         | 1         | 0           | 0           |
| 0               | 0               | #NULL!             | 4         | 1         | 0           | 0           |
| 0               | 0               | #NULL!             | 3         | 2         | 0           | 0           |
| 0               | 0               | #NULL!             | 1         | 1         | 0           | 0           |
| 0               | 0               | #NULL!             | 2         | 1         | 0           | 0           |
| 0               | 0               | #NULL!             | 3         | 2         | 0           | 0           |
| 1               | 0               | #NULL!             | 3         | 3         | 0           | 0           |
| 0               | 0               | #NULL!             | 1         | 1         | 1           | 5           |
| 0               | 0               | #NULL!             | 2         | 2         | 0           | 0           |
| 0               | 0               | #NULL!             | 3         | 3         | 0           | 0           |
| 0               | 0               | #NULL!             | 1         | 99        | 0           | 0           |
| 0               | 0               | #NULL!             | 3         | 1         | 0           | 0           |
| 0               | 0               | #NULL!             | 3         | 1         | 0           | 0           |
| 0               | 0               | #NULL!             | 3         | 1         | 0           | 0           |
| 1               | 0               | #NULL!             | 3         | 1         | 2           | 0           |
| 0               | 0               | #NULL!             | 2         | 2         | 2           | 3           |
| 0               | 0               | #NULL!             | 3         | 2         | 0           | 0           |
| 0               | 0               | #NULL!             | 1         | 1         | 0           | 0           |
| 0               | 0               | #NULL!             | 1         | 1         | 0           | 0           |
| 0               | 0               | #NULL!             | 1         | 1         | 0           | 0           |
| 0               | 0               | #NULL!             | 1         | 1         | 0           | 0           |
| 0               | 0               | #NULL!             | 1         | 1         | 0           | 0           |
| 0               | 0               | #NULL!             | 1         | 1         | 0           | 0           |
| 0               | 0               | #NULL!             | 1         | 2         | 1           | 1           |

|   |   |        |   |   |   |   |
|---|---|--------|---|---|---|---|
| 0 | 0 | #NULL! | 3 | 3 | 2 | 3 |
| 0 | 0 | #NULL! | 1 | 1 | 0 | 0 |
| 0 | 0 | #NULL! | 3 | 2 | 0 | 0 |
| 0 | 0 | #NULL! | 1 | 1 | 0 | 1 |
| 0 | 0 | #NULL! | 3 | 2 | 1 | 0 |
| 0 | 0 | #NULL! | 1 | 2 | 0 | 0 |
| 0 | 0 | #NULL! | 1 | 1 | 0 | 0 |
| 0 | 0 | #NULL! | 4 | 4 | 0 | 1 |
| 0 | 0 | #NULL! | 4 | 3 | 0 | 3 |
| 1 | 0 | #NULL! | 4 | 1 | 1 | 1 |
| 0 | 0 | #NULL! | 3 | 3 | 0 | 0 |
| 0 | 0 | #NULL! | 1 | 1 | 0 | 0 |
| 0 | 0 | #NULL! | 3 | 3 | 0 | 0 |
| 1 | 0 | #NULL! | 2 | 1 | 3 | 4 |
| 0 | 0 | #NULL! | 2 | 2 | 0 | 1 |
| 1 | 0 | #NULL! | 2 | 2 | 0 | 0 |
| 0 | 0 | #NULL! | 1 | 1 | 0 | 0 |
| 0 | 0 | #NULL! | 3 | 3 | 5 | 5 |
| 0 | 0 | #NULL! | 1 | 1 | 0 | 0 |
| 0 | 0 | #NULL! | 1 | 2 | 0 | 1 |
| 0 | 0 | #NULL! | 3 | 3 | 0 | 5 |
| 0 | 0 | #NULL! | 3 | 2 | 0 | 0 |
| 0 | 0 | #NULL! | 1 | 1 | 0 | 0 |
| 0 | 0 | #NULL! | 1 | 2 | 1 | 0 |
| 0 | 0 | #NULL! | 1 | 1 | 0 | 0 |
| 0 | 0 | #NULL! | 3 | 1 | 0 | 0 |
| 0 | 0 | #NULL! | 1 | 1 | 0 | 0 |
| 0 | 0 | #NULL! | 3 | 3 | 0 | 5 |
| 0 | 0 | #NULL! | 3 | 2 | 5 | 5 |
| 0 | 0 | #NULL! | 3 | 2 | 0 | 0 |
| 0 | 0 | #NULL! | 1 | 2 | 0 | 0 |
| 0 | 0 | #NULL! | 3 | 2 | 0 | 1 |
| 0 | 0 | #NULL! | 1 | 1 | 0 | 0 |
| 0 | 0 | #NULL! | 1 | 1 | 0 | 0 |
| 0 | 0 | #NULL! | 3 | 2 | 0 | 2 |
| 0 | 0 | #NULL! | 3 | 3 | 0 | 0 |
| 0 | 0 | #NULL! | 2 | 4 | 0 | 0 |
| 0 | 0 | #NULL! | 3 | 3 | 1 | 1 |
| 0 | 0 | #NULL! | 4 | 3 | 0 | 2 |
| 0 | 0 | #NULL! | 1 | 1 | 0 | 0 |
| 0 | 0 | #NULL! | 4 | 3 | 0 | 2 |
| 0 | 0 | #NULL! | 3 | 2 | 3 | 5 |
| 0 | 0 | #NULL! | 3 | 3 | 2 | 3 |
| 0 | 0 | #NULL! | 3 | 3 | 0 | 0 |
| 0 | 0 | #NULL! | 3 | 3 | 0 | 0 |
| 0 | 0 | #NULL! | 1 | 1 | 1 | 1 |
| 0 | 0 | #NULL! | 1 | 1 | 0 | 0 |
| 0 | 0 | #NULL! | 3 | 3 | 0 | 0 |



|   |   |        |   |   |   |   |
|---|---|--------|---|---|---|---|
| 0 | 0 | #NULL! | 1 | 1 | 0 | 0 |
| 0 | 0 | #NULL! | 3 | 2 | 4 | 4 |
| 0 | 0 | #NULL! | 4 | 2 | 0 | 1 |
| 0 | 0 | #NULL! | 2 | 1 | 0 | 0 |
| 0 | 0 | #NULL! | 2 | 2 | 0 | 0 |
| 0 | 0 | #NULL! | 1 | 1 | 0 | 0 |
| 0 | 0 | #NULL! | 2 | 2 | 1 | 5 |
| 0 | 0 | #NULL! | 2 | 1 | 0 | 0 |
| 0 | 0 | #NULL! | 4 | 2 | 0 | 1 |
| 0 | 0 | #NULL! | 1 | 1 | 2 | 2 |
| 0 | 0 | #NULL! | 2 | 2 | 1 | 1 |
| 1 | 0 | #NULL! | 3 | 3 | 0 | 0 |
| 0 | 0 | #NULL! | 1 | 1 | 1 | 2 |
| 0 | 0 | #NULL! | 1 | 2 | 3 | 3 |
| 0 | 0 | #NULL! | 2 | 1 | 0 | 0 |
| 0 | 0 | #NULL! | 4 | 3 | 0 | 5 |
| 0 | 0 | #NULL! | 1 | 1 | 0 | 0 |
| 0 | 0 | #NULL! | 3 | 2 | 0 | 0 |
| 0 | 0 | #NULL! | 3 | 2 | 0 | 0 |
| 0 | 0 | #NULL! | 3 | 3 | 0 | 0 |
| 0 | 0 | #NULL! | 5 | 3 | 1 | 2 |
| 0 | 0 | #NULL! | 1 | 1 | 0 | 2 |
| 0 | 1 | #NULL! | 1 | 5 | 0 | 0 |
| 0 | 0 | #NULL! | 1 | 1 | 0 | 0 |
| 0 | 0 | #NULL! | 3 | 1 | 0 | 0 |
| 0 | 0 | #NULL! | 4 | 2 | 1 | 4 |
| 0 | 0 | #NULL! | 4 | 1 | 0 | 0 |
| 0 | 0 | #NULL! | 1 | 1 | 0 | 0 |
| 0 | 0 | #NULL! | 3 | 3 | 0 | 0 |
| 0 | 0 | #NULL! | 3 | 2 | 0 | 0 |
| 0 | 0 | #NULL! | 3 | 2 | 0 | 0 |
| 0 | 0 | #NULL! | 1 | 1 | 0 | 0 |
| 0 | 0 | #NULL! | 3 | 3 | 0 | 0 |
| 0 | 0 | #NULL! | 3 | 3 | 0 | 0 |
| 0 | 0 | #NULL! | 3 | 3 | 0 | 0 |
| 0 | 0 | #NULL! | 3 | 1 | 0 | 0 |
| 0 | 0 | #NULL! | 1 | 1 | 0 | 0 |
| 0 | 0 | #NULL! | 1 | 1 | 0 | 0 |
| 0 | 0 | #NULL! | 2 | 1 | 0 | 0 |
| 0 | 0 | #NULL! | 3 | 2 | 0 | 1 |
| 0 | 0 | #NULL! | 1 | 1 | 0 | 0 |
| 0 | 0 | #NULL! | 1 | 1 | 0 | 0 |
| 0 | 0 | #NULL! | 1 | 1 | 1 | 1 |
| 0 | 0 | #NULL! | 1 | 1 | 0 | 0 |
| 0 | 0 | #NULL! | 2 | 4 | 0 | 0 |

|   |   |        |    |   |   |   |
|---|---|--------|----|---|---|---|
| 0 | 0 | #NULL! | 1  | 1 | 0 | 0 |
| 0 | 0 | #NULL! | 3  | 3 | 0 | 1 |
| 0 | 0 | #NULL! | 1  | 1 | 0 | 0 |
| 0 | 0 | #NULL! | 1  | 1 | 1 | 1 |
| 0 | 0 | #NULL! | 1  | 1 | 1 | 2 |
| 0 | 0 | #NULL! | 1  | 1 | 0 | 0 |
| 0 | 0 | #NULL! | 4  | 4 | 0 | 0 |
| 0 | 0 | #NULL! | 3  | 2 | 0 | 1 |
| 0 | 0 | #NULL! | 5  | 3 | 0 | 0 |
| 0 | 0 | #NULL! | 1  | 1 | 0 | 0 |
| 0 | 0 | #NULL! | 2  | 3 | 0 | 0 |
| 0 | 1 | #NULL! | 5  | 5 | 0 | 0 |
| 0 | 0 | #NULL! | 3  | 1 | 0 | 0 |
| 0 | 0 | #NULL! | 1  | 1 | 0 | 0 |
| 0 | 0 | #NULL! | 5  | 4 | 0 | 0 |
| 0 | 0 | #NULL! | 3  | 2 | 0 | 0 |
| 0 | 0 | #NULL! | 1  | 1 | 0 | 0 |
| 0 | 0 | #NULL! | 3  | 1 | 0 | 0 |
| 0 | 0 | #NULL! | 3  | 3 | 0 | 0 |
| 0 | 0 | #NULL! | 3  | 3 | 0 | 0 |
| 0 | 0 | #NULL! | 4  | 1 | 0 | 0 |
| 0 | 0 | #NULL! | 4  | 1 | 0 | 0 |
| 0 | 0 | #NULL! | 1  | 1 | 0 | 0 |
| 0 | 0 | #NULL! | 1  | 1 | 0 | 0 |
| 0 | 0 | #NULL! | 3  | 1 | 0 | 0 |
| 0 | 0 | #NULL! | 1  | 1 | 0 | 0 |
| 0 | 0 | #NULL! | 2  | 2 | 0 | 0 |
| 0 | 0 | #NULL! | 1  | 1 | 0 | 0 |
| 0 | 0 | #NULL! | 1  | 1 | 0 | 0 |
| 0 | 0 | #NULL! | 1  | 1 | 0 | 0 |
| 0 | 0 | #NULL! | 1  | 1 | 0 | 0 |
| 0 | 0 | #NULL! | 2  | 1 | 0 | 0 |
| 0 | 0 | #NULL! | 2  | 1 | 0 | 0 |
| 0 | 0 | #NULL! | 4  | 1 | 0 | 0 |
| 0 | 0 | #NULL! | 1  | 1 | 1 | 1 |
| 0 | 0 | #NULL! | 1  | 2 | 0 | 0 |
| 0 | 0 | #NULL! | 1  | 1 | 0 | 0 |
| 0 | 0 | #NULL! | 99 | 1 | 0 | 0 |
| 0 | 0 | #NULL! | 1  | 1 | 0 | 0 |
| 0 | 0 | #NULL! | 1  | 1 | 0 | 0 |
| 0 | 0 | #NULL! | 2  | 2 | 0 | 0 |
| 0 | 0 | #NULL! | 5  | 3 | 0 | 0 |
| 0 | 0 | #NULL! | 1  | 1 | 0 | 0 |
| 0 | 0 | #NULL! | 1  | 2 | 0 | 0 |
| 0 | 0 | #NULL! | 1  | 1 | 0 | 0 |
| 0 | 0 | #NULL! | 1  | 1 | 0 | 0 |
| 0 | 0 | #NULL! | 1  | 1 | 0 | 0 |
| 0 | 0 | #NULL! | 1  | 1 | 0 | 0 |

|   |   |        |   |    |   |    |
|---|---|--------|---|----|---|----|
| 0 | 0 | #NULL! | 4 | 2  | 0 | 0  |
| 0 | 0 | #NULL! | 1 | 1  | 0 | 0  |
| 0 | 0 | #NULL! | 1 | 1  | 0 | 0  |
| 0 | 0 | #NULL! | 4 | 2  | 0 | 2  |
| 0 | 0 | #NULL! | 1 | 1  | 0 | 1  |
| 0 | 0 | #NULL! | 1 | 1  | 0 | 0  |
| 0 | 0 | #NULL! | 1 | 1  | 0 | 0  |
| 0 | 0 | #NULL! | 1 | 1  | 2 | 2  |
| 0 | 0 | #NULL! | 3 | 3  | 0 | 0  |
| 0 | 0 | #NULL! | 1 | 1  | 0 | 0  |
| 0 | 0 | #NULL! | 2 | 3  | 0 | 0  |
| 0 | 0 | #NULL! | 4 | 2  | 2 | 2  |
| 0 | 0 | #NULL! | 1 | 1  | 0 | 0  |
| 0 | 0 | #NULL! | 1 | 1  | 2 | 1  |
| 0 | 0 | #NULL! | 3 | 2  | 0 | 0  |
| 0 | 0 | #NULL! | 1 | 1  | 0 | 2  |
| 0 | 0 | #NULL! | 1 | 1  | 0 | 0  |
| 0 | 0 | #NULL! | 2 | 2  | 1 | 1  |
| 0 | 0 | #NULL! | 1 | 1  | 0 | 0  |
| 0 | 0 | #NULL! | 4 | 4  | 0 | 0  |
| 0 | 0 | #NULL! | 1 | 1  | 0 | 0  |
| 0 | 0 | #NULL! | 3 | 3  | 0 | 0  |
| 0 | 0 | #NULL! | 3 | 4  | 0 | 0  |
| 0 | 0 | #NULL! | 3 | 3  | 0 | 0  |
| 0 | 0 | #NULL! | 1 | 2  | 2 | 99 |
| 0 | 0 | #NULL! | 1 | 1  | 1 | 0  |
| 0 | 0 | #NULL! | 1 | 1  | 0 | 0  |
| 0 | 0 | #NULL! | 2 | 1  | 1 | 0  |
| 0 | 0 | #NULL! | 3 | 2  | 2 | 2  |
| 0 | 0 | #NULL! | 2 | 1  | 0 | 0  |
| 0 | 0 | #NULL! | 3 | 3  | 0 | 0  |
| 0 | 0 | #NULL! | 4 | 1  | 0 | 1  |
| 0 | 0 | #NULL! | 4 | 4  | 0 | 3  |
| 0 | 0 | #NULL! | 3 | 1  | 0 | 0  |
| 0 | 0 | #NULL! | 2 | 1  | 2 | 2  |
| 0 | 0 | #NULL! | 1 | 1  | 0 | 2  |
| 0 | 0 | #NULL! | 3 | 3  | 1 | 0  |
| 0 | 0 | #NULL! | 3 | 2  | 0 | 1  |
| 0 | 0 | #NULL! | 3 | 2  | 0 | 0  |
| 0 | 0 | #NULL! | 4 | 3  | 0 | 0  |
| 0 | 0 | #NULL! | 1 | 99 | 1 | 3  |
| 0 | 0 | #NULL! | 2 | 2  | 0 | 0  |
| 0 | 0 | #NULL! | 1 | 1  | 0 | 0  |
| 0 | 0 | #NULL! | 1 | 1  | 0 | 0  |
| 0 | 0 | #NULL! | 1 | 1  | 0 | 0  |
| 0 | 0 | #NULL! | 1 | 1  | 1 | 0  |
| 0 | 0 | #NULL! | 1 | 1  | 0 | 0  |
| 0 | 0 | #NULL! | 3 | 1  | 0 | 0  |

|   |   |        |    |    |   |   |
|---|---|--------|----|----|---|---|
| 0 | 0 | #NULL! | 1  | 3  | 0 | 0 |
| 0 | 0 | #NULL! | 3  | 3  | 0 | 0 |
| 0 | 0 | #NULL! | 1  | 1  | 0 | 0 |
| 0 | 0 | #NULL! | 4  | 2  | 0 | 0 |
| 1 | 0 | #NULL! | 99 | 99 | 1 | 2 |
| 0 | 0 | #NULL! | 3  | 3  | 0 | 0 |
| 0 | 0 | #NULL! | 3  | 3  | 0 | 0 |
| 0 | 0 | #NULL! | 1  | 1  | 0 | 0 |
| 0 | 0 | #NULL! | 1  | 3  | 0 | 0 |
| 0 | 0 | #NULL! | 3  | 3  | 0 | 0 |
| 0 | 0 | #NULL! | 1  | 1  | 0 | 0 |
| 0 | 0 | #NULL! | 1  | 99 | 0 | 0 |
| 0 | 0 | #NULL! | 3  | 2  | 0 | 0 |
| 0 | 0 | #NULL! | 99 | 1  | 0 | 2 |
| 0 | 0 | #NULL! | 3  | 1  | 0 | 0 |
| 0 | 0 | #NULL! | 2  | 1  | 1 | 2 |
| 0 | 0 | #NULL! | 2  | 2  | 0 | 0 |
| 0 | 0 | #NULL! | 1  | 1  | 0 | 0 |
| 0 | 0 | #NULL! | 1  | 1  | 0 | 0 |
| 0 | 0 | #NULL! | 1  | 1  | 0 | 0 |
| 0 | 0 | #NULL! | 3  | 3  | 1 | 0 |
| 0 | 0 | #NULL! | 1  | 1  | 0 | 0 |
| 0 | 0 | #NULL! | 5  | 2  | 0 | 1 |
| 0 | 0 | #NULL! | 1  | 1  | 0 | 0 |
| 0 | 0 | #NULL! | 1  | 3  | 0 | 0 |
| 0 | 0 | #NULL! | 1  | 1  | 0 | 0 |
| 0 | 0 | #NULL! | 1  | 2  | 0 | 0 |
| 0 | 0 | #NULL! | 3  | 3  | 0 | 0 |
| 0 | 0 | #NULL! | 1  | 1  | 0 | 0 |
| 0 | 0 | #NULL! | 3  | 2  | 0 | 0 |
| 0 | 0 | #NULL! | 3  | 3  | 0 | 1 |
| 0 | 0 | #NULL! | 4  | 3  | 0 | 1 |
| 0 | 0 | #NULL! | 3  | 2  | 0 | 0 |
| 0 | 0 | #NULL! | 5  | 2  | 0 | 0 |
| 0 | 0 | #NULL! | 1  | 1  | 1 | 5 |
| 0 | 0 | #NULL! | 4  | 1  | 1 | 5 |
| 0 | 0 | #NULL! | 3  | 2  | 0 | 0 |
| 0 | 0 | #NULL! | 1  | 1  | 0 | 0 |
| 0 | 0 | #NULL! | 1  | 1  | 0 | 0 |
| 0 | 0 | #NULL! | 3  | 2  | 1 | 0 |
| 0 | 0 | #NULL! | 3  | 2  | 3 | 2 |
| 0 | 0 | #NULL! | 3  | 2  | 0 | 0 |
| 0 | 0 | #NULL! | 3  | 3  | 0 | 0 |
| 0 | 0 | #NULL! | 3  | 3  | 0 | 0 |
| 0 | 0 | #NULL! | 3  | 3  | 0 | 0 |
| 0 | 0 | #NULL! | 3  | 3  | 0 | 0 |
| 0 | 0 | #NULL! | 2  | 2  | 0 | 0 |
| 0 | 0 | #NULL! | 1  | 1  | 0 | 0 |
| 0 | 0 | #NULL! | 3  | 2  | 0 | 0 |

|   |   |        |   |   |    |    |
|---|---|--------|---|---|----|----|
| 0 | 0 | #NULL! | 2 | 2 | 0  | 0  |
| 0 | 0 | #NULL! | 1 | 1 | 0  | 0  |
| 0 | 0 | #NULL! | 1 | 1 | 0  | 0  |
| 0 | 0 | #NULL! | 3 | 2 | 0  | 0  |
| 0 | 0 | #NULL! | 1 | 1 | 0  | 0  |
| 0 | 0 | #NULL! | 2 | 1 | 0  | 0  |
| 0 | 0 | #NULL! | 1 | 1 | 2  | 0  |
| 0 | 0 | #NULL! | 1 | 1 | 0  | 0  |
| 0 | 0 | #NULL! | 2 | 2 | 3  | 4  |
| 0 | 0 | #NULL! | 4 | 2 | 0  | 3  |
| 0 | 0 | #NULL! | 1 | 1 | 1  | 1  |
| 0 | 0 | #NULL! | 3 | 4 | 0  | 1  |
| 0 | 0 | #NULL! | 3 | 2 | 0  | 0  |
| 0 | 0 | #NULL! | 2 | 2 | 0  | 0  |
| 0 | 0 | #NULL! | 1 | 2 | 0  | 1  |
| 0 | 0 | #NULL! | 1 | 1 | 0  | 0  |
| 0 | 0 | #NULL! | 3 | 3 | 0  | 2  |
| 0 | 0 | #NULL! | 4 | 3 | 0  | 0  |
| 0 | 0 | #NULL! | 4 | 3 | 0  | 0  |
| 0 | 0 | #NULL! | 1 | 1 | 0  | 0  |
| 0 | 0 | #NULL! | 1 | 1 | 0  | 0  |
| 0 | 0 | #NULL! | 1 | 1 | 5  | 5  |
| 0 | 0 | #NULL! | 3 | 3 | 0  | 2  |
| 1 | 0 | #NULL! | 3 | 1 | 1  | 4  |
| 0 | 0 | #NULL! | 4 | 2 | 0  | 0  |
| 0 | 0 | #NULL! | 3 | 3 | 0  | 0  |
| 0 | 0 | #NULL! | 1 | 2 | 5  | 5  |
| 0 | 0 | #NULL! | 3 | 4 | 0  | 0  |
| 0 | 0 | #NULL! | 1 | 1 | 0  | 0  |
| 0 | 0 | #NULL! | 2 | 2 | 0  | 0  |
| 0 | 0 | #NULL! | 1 | 1 | 0  | 0  |
| 0 | 0 | #NULL! | 1 | 2 | 0  | 0  |
| 0 | 0 | #NULL! | 1 | 1 | 1  | 1  |
| 0 | 0 | #NULL! | 3 | 2 | 99 | 99 |
| 0 | 0 | #NULL! | 1 | 1 | 0  | 0  |
| 0 | 0 | #NULL! | 1 | 1 | 1  | 5  |
| 0 | 0 | #NULL! | 3 | 3 | 1  | 3  |
| 0 | 0 | #NULL! | 3 | 3 | 0  | 0  |
| 0 | 0 | #NULL! | 3 | 3 | 0  | 0  |
| 0 | 0 | #NULL! | 3 | 3 | 0  | 0  |
| 0 | 0 | #NULL! | 4 | 3 | 3  | 5  |
| 0 | 0 | #NULL! | 3 | 2 | 0  | 2  |
| 0 | 0 | #NULL! | 4 | 2 | 1  | 1  |
| 0 | 0 | #NULL! | 4 | 4 | 0  | 0  |
| 0 | 0 | #NULL! | 1 | 1 | 0  | 0  |
| 0 | 0 | #NULL! | 3 | 3 | 2  | 2  |
| 0 | 0 | #NULL! | 3 | 3 | 1  | 1  |
| 0 | 0 | #NULL! | 3 | 2 | 0  | 0  |

|   |   |        |   |   |   |    |
|---|---|--------|---|---|---|----|
| 0 | 0 | #NULL! | 3 | 3 | 0 | 0  |
| 0 | 0 | #NULL! | 3 | 2 | 0 | 1  |
| 1 | 0 | #NULL! | 3 | 3 | 0 | 0  |
| 0 | 0 | #NULL! | 1 | 2 | 0 | 0  |
| 0 | 0 | #NULL! | 3 | 3 | 0 | 1  |
| 0 | 0 | #NULL! | 1 | 1 | 0 | 0  |
| 0 | 0 | #NULL! | 2 | 2 | 2 | 5  |
| 0 | 0 | #NULL! | 1 | 1 | 1 | 4  |
| 0 | 0 | #NULL! | 1 | 1 | 2 | 5  |
| 0 | 0 | #NULL! | 2 | 3 | 0 | 4  |
| 0 | 0 | #NULL! | 1 | 1 | 1 | 0  |
| 0 | 0 | #NULL! | 5 | 3 | 0 | 0  |
| 0 | 0 | #NULL! | 1 | 1 | 4 | 2  |
| 0 | 0 | #NULL! | 1 | 2 | 0 | 3  |
| 0 | 0 | #NULL! | 3 | 3 | 0 | 0  |
| 0 | 0 | #NULL! | 3 | 3 | 1 | 2  |
| 1 | 0 | #NULL! | 4 | 2 | 0 | 0  |
| 0 | 0 | #NULL! | 4 | 2 | 0 | 0  |
| 0 | 0 | #NULL! | 3 | 2 | 0 | 1  |
| 0 | 0 | #NULL! | 3 | 3 | 0 | 2  |
| 0 | 0 | #NULL! | 3 | 2 | 0 | 0  |
| 0 | 0 | #NULL! | 2 | 1 | 0 | 0  |
| 0 | 0 | #NULL! | 1 | 1 | 0 | 0  |
| 0 | 0 | #NULL! | 2 | 1 | 3 | 3  |
| 0 | 0 | #NULL! | 3 | 1 | 0 | 0  |
| 0 | 0 | #NULL! | 1 | 1 | 0 | 0  |
| 0 | 0 | #NULL! | 1 | 1 | 0 | 0  |
| 0 | 0 | #NULL! | 1 | 1 | 0 | 0  |
| 0 | 0 | #NULL! | 3 | 3 | 0 | 0  |
| 0 | 0 | #NULL! | 1 | 2 | 2 | 2  |
| 0 | 0 | #NULL! | 1 | 1 | 0 | 99 |
| 0 | 0 | #NULL! | 1 | 1 | 0 | 0  |
| 0 | 0 | #NULL! | 3 | 2 | 0 | 0  |
| 0 | 0 | #NULL! | 1 | 1 | 0 | 0  |
| 1 | 0 | #NULL! | 4 | 1 | 0 | 0  |
| 0 | 0 | #NULL! | 4 | 2 | 0 | 0  |
| 0 | 0 | #NULL! | 1 | 1 | 0 | 0  |
| 0 | 0 | #NULL! | 1 | 1 | 0 | 0  |
| 0 | 0 | #NULL! | 1 | 1 | 0 | 0  |
| 0 | 0 | #NULL! | 3 | 3 | 0 | 0  |
| 0 | 0 | #NULL! | 1 | 1 | 0 | 0  |
| 0 | 0 | #NULL! | 1 | 2 | 0 | 99 |
| 0 | 0 | #NULL! | 3 | 2 | 0 | 1  |
| 0 | 0 | #NULL! | 2 | 1 | 0 | 0  |
| 0 | 0 | #NULL! | 3 | 3 | 0 | 1  |
| 0 | 0 | #NULL! | 1 | 1 | 0 | 0  |
| 0 | 0 | #NULL! | 1 | 1 | 0 | 0  |
| 0 | 0 | #NULL! | 1 | 1 | 0 | 0  |
| 0 | 0 | #NULL! | 4 | 1 | 0 | 0  |

|   |   |        |   |   |   |   |
|---|---|--------|---|---|---|---|
| 0 | 0 | #NULL! | 1 | 1 | 0 | 0 |
| 0 | 0 | #NULL! | 3 | 3 | 0 | 0 |
| 0 | 0 | #NULL! | 3 | 3 | 0 | 1 |
| 0 | 0 | #NULL! | 2 | 1 | 1 | 2 |
| 0 | 0 | #NULL! | 1 | 1 | 0 | 0 |
| 0 | 0 | #NULL! | 1 | 1 | 3 | 4 |
| 0 | 0 | #NULL! | 1 | 1 | 0 | 0 |
| 0 | 0 | #NULL! | 1 | 1 | 3 | 4 |
| 0 | 0 | #NULL! | 4 | 2 | 0 | 0 |
| 0 | 0 | #NULL! | 1 | 4 | 0 | 0 |
| 0 | 0 | #NULL! | 1 | 1 | 0 | 0 |
| 0 | 0 | #NULL! | 1 | 1 | 0 | 1 |
| 0 | 0 | #NULL! | 4 | 2 | 0 | 2 |
| 0 | 0 | #NULL! | 3 | 2 | 0 | 0 |
| 0 | 0 | #NULL! | 1 | 1 | 0 | 0 |
| 0 | 0 | #NULL! | 1 | 1 | 0 | 0 |
| 0 | 0 | #NULL! | 1 | 3 | 5 | 5 |
| 0 | 0 | #NULL! | 1 | 1 | 0 | 0 |
| 0 | 0 | #NULL! | 3 | 2 | 0 | 0 |
| 0 | 0 | #NULL! | 1 | 1 | 0 | 0 |
| 0 | 0 | #NULL! | 3 | 2 | 0 | 1 |
| 0 | 1 | #NULL! | 2 | 2 | 0 | 0 |
| 0 | 0 | #NULL! | 4 | 2 | 1 | 4 |
| 0 | 0 | #NULL! | 4 | 2 | 0 | 0 |
| 0 | 0 | #NULL! | 3 | 2 | 0 | 0 |
| 0 | 0 | #NULL! | 1 | 1 | 2 | 1 |
| 0 | 0 | #NULL! | 4 | 3 | 0 | 1 |
| 0 | 0 | #NULL! | 1 | 1 | 0 | 0 |
| 0 | 0 | #NULL! | 4 | 3 | 0 | 0 |
| 0 | 0 | #NULL! | 5 | 5 | 0 | 0 |
| 0 | 0 | #NULL! | 3 | 3 | 1 | 1 |
| 0 | 0 | #NULL! | 3 | 1 | 0 | 0 |
| 1 | 0 | #NULL! | 2 | 1 | 0 | 0 |
| 0 | 0 | #NULL! | 3 | 3 | 0 | 0 |
| 0 | 0 | #NULL! | 5 | 5 | 0 | 0 |
| 0 | 0 | #NULL! | 4 | 3 | 0 | 0 |
| 0 | 0 | #NULL! | 1 | 1 | 0 | 0 |
| 1 | 0 | #NULL! | 1 | 1 | 0 | 1 |
| 0 | 0 | #NULL! | 4 | 4 | 0 | 0 |
| 1 | 0 | #NULL! | 4 | 3 | 0 | 0 |
| 0 | 0 | #NULL! | 1 | 1 | 0 | 0 |
| 0 | 0 | #NULL! | 3 | 2 | 2 | 0 |
| 0 | 0 | #NULL! | 3 | 3 | 0 | 2 |
| 0 | 0 | #NULL! | 1 | 1 | 0 | 1 |
| 0 | 0 | #NULL! | 1 | 1 | 0 | 1 |
| 0 | 0 | #NULL! | 3 | 2 | 1 | 0 |
| 0 | 0 | #NULL! | 1 | 1 | 0 | 1 |
| 0 | 0 | #NULL! | 2 | 2 | 3 | 2 |

|   |   |        |    |    |   |   |
|---|---|--------|----|----|---|---|
| 0 | 0 | #NULL! | 4  | 2  | 0 | 0 |
| 0 | 0 | #NULL! | 1  | 1  | 0 | 0 |
| 0 | 0 | #NULL! | 4  | 3  | 0 | 0 |
| 0 | 0 | #NULL! | 4  | 1  | 0 | 0 |
| 0 | 0 | #NULL! | 3  | 2  | 0 | 0 |
| 0 | 0 | #NULL! | 3  | 2  | 1 | 1 |
| 0 | 0 | #NULL! | 2  | 1  | 3 | 5 |
| 0 | 0 | #NULL! | 3  | 2  | 1 | 2 |
| 0 | 0 | #NULL! | 1  | 1  | 2 | 3 |
| 0 | 0 | #NULL! | 3  | 3  | 0 | 3 |
| 0 | 0 | #NULL! | 1  | 1  | 1 | 1 |
| 0 | 0 | #NULL! | 3  | 3  | 5 | 5 |
| 0 | 0 | #NULL! | 1  | 1  | 0 | 0 |
| 0 | 0 | #NULL! | 2  | 3  | 0 | 0 |
| 0 | 0 | #NULL! | 3  | 3  | 0 | 0 |
| 0 | 0 | #NULL! | 1  | 1  | 5 | 3 |
| 0 | 0 | #NULL! | 3  | 1  | 0 | 1 |
| 0 | 0 | #NULL! | 1  | 3  | 0 | 0 |
| 0 | 0 | #NULL! | 1  | 1  | 0 | 0 |
| 0 | 0 | #NULL! | 3  | 3  | 0 | 0 |
| 0 | 0 | #NULL! | 1  | 1  | 0 | 0 |
| 0 | 0 | #NULL! | 2  | 3  | 5 | 5 |
| 0 | 0 | #NULL! | 2  | 3  | 2 | 3 |
| 0 | 0 | #NULL! | 4  | 3  | 0 | 4 |
| 0 | 0 | #NULL! | 1  | 1  | 1 | 3 |
| 0 | 0 | #NULL! | 4  | 2  | 0 | 3 |
| 0 | 0 | #NULL! | 1  | 1  | 5 | 5 |
| 0 | 0 | #NULL! | 3  | 2  | 0 | 0 |
| 0 | 0 | #NULL! | 3  | 2  | 0 | 0 |
| 0 | 0 | #NULL! | 3  | 3  | 4 | 5 |
| 0 | 0 | #NULL! | 3  | 2  | 0 | 0 |
| 0 | 0 | #NULL! | 4  | 2  | 3 | 3 |
| 0 | 0 | #NULL! | 3  | 3  | 1 | 1 |
| 0 | 0 | #NULL! | 1  | 1  | 0 | 0 |
| 0 | 0 | #NULL! | 2  | 2  | 0 | 2 |
| 0 | 0 | #NULL! | 4  | 3  | 0 | 0 |
| 0 | 0 | #NULL! | 3  | 2  | 0 | 1 |
| 0 | 0 | #NULL! | 4  | 2  | 0 | 0 |
| 0 | 0 | #NULL! | 3  | 3  | 0 | 0 |
| 0 | 0 | #NULL! | 1  | 1  | 0 | 0 |
| 0 | 0 | #NULL! | 3  | 2  | 0 | 0 |
| 0 | 0 | #NULL! | 1  | 1  | 0 | 0 |
| 0 | 0 | #NULL! | 5  | 5  | 0 | 0 |
| 0 | 0 | #NULL! | 1  | 1  | 2 | 2 |
| 0 | 0 | #NULL! | 1  | 1  | 0 | 0 |
| 0 | 0 | #NULL! | 4  | 99 | 0 | 0 |
| 0 | 0 | #NULL! | 3  | 2  | 0 | 1 |
| 0 | 0 | #NULL! | 99 | 1  | 0 | 0 |



|   |   |        |    |    |    |    |
|---|---|--------|----|----|----|----|
| 0 | 0 | #NULL! | 4  | 3  | 0  | 0  |
| 0 | 0 | #NULL! | 2  | 3  | 0  | 0  |
| 0 | 0 | #NULL! | 2  | 2  | 0  | 0  |
| 0 | 0 | #NULL! | 4  | 2  | 0  | 0  |
| 0 | 0 | #NULL! | 1  | 2  | 5  | 3  |
| 0 | 0 | #NULL! | 1  | 1  | 0  | 0  |
| 0 | 0 | #NULL! | 1  | 3  | 0  | 0  |
| 0 | 0 | #NULL! | 1  | 2  | 0  | 2  |
| 0 | 0 | #NULL! | 1  | 2  | 1  | 1  |
| 0 | 0 | #NULL! | 1  | 1  | 2  | 2  |
| 0 | 0 | #NULL! | 2  | 2  | 0  | 0  |
| 0 | 0 | #NULL! | 1  | 1  | 0  | 0  |
| 0 | 0 | #NULL! | 3  | 2  | 0  | 0  |
| 0 | 0 | #NULL! | 1  | 1  | 0  | 0  |
| 0 | 0 | #NULL! | 3  | 2  | 0  | 0  |
| 0 | 0 | #NULL! | 3  | 2  | 0  | 0  |
| 0 | 0 | #NULL! | 4  | 1  | 0  | 0  |
| 0 | 0 | #NULL! | 3  | 1  | 0  | 0  |
| 0 | 0 | #NULL! | 2  | 2  | 0  | 0  |
| 0 | 0 | #NULL! | 3  | 3  | 0  | 1  |
| 0 | 0 | #NULL! | 4  | 2  | 0  | 1  |
| 0 | 0 | #NULL! | 3  | 1  | 0  | 1  |
| 0 | 0 | #NULL! | 2  | 1  | 0  | 0  |
| 0 | 0 | #NULL! | 4  | 3  | 0  | 2  |
| 0 | 0 | #NULL! | 99 | 1  | 99 | 99 |
| 0 | 0 | #NULL! | 1  | 1  | 0  | 1  |
| 0 | 0 | #NULL! | 2  | 1  | 0  | 0  |
| 0 | 0 | #NULL! | 5  | 4  | 0  | 0  |
| 0 | 0 | #NULL! | 1  | 1  | 0  | 0  |
| 0 | 0 | #NULL! | 4  | 1  | 0  | 1  |
| 0 | 0 | #NULL! | 1  | 2  | 1  | 0  |
| 0 | 0 | #NULL! | 99 | 99 | 0  | 0  |
| 0 | 0 | #NULL! | 1  | 1  | 0  | 0  |
| 0 | 0 | #NULL! | 5  | 3  | 0  | 0  |
| 0 | 0 | #NULL! | 99 | 99 | 0  | 0  |
| 0 | 0 | #NULL! | 5  | 3  | 0  | 0  |
| 0 | 0 | #NULL! | 4  | 1  | 1  | 2  |
| 0 | 0 | #NULL! | 3  | 99 | 0  | 0  |
| 0 | 0 | #NULL! | 4  | 2  | 0  | 0  |
| 0 | 0 | #NULL! | 5  | 3  | 0  | 0  |
| 0 | 0 | #NULL! | 1  | 1  | 0  | 0  |
| 0 | 0 | #NULL! | 5  | 3  | 0  | 0  |
| 0 | 0 | #NULL! | 1  | 1  | 0  | 0  |
| 0 | 0 | #NULL! | 4  | 3  | 0  | 0  |
| 0 | 0 | #NULL! | 1  | 1  | 1  | 1  |
| 0 | 0 | #NULL! | 1  | 1  | 0  | 0  |
| 0 | 0 | #NULL! | 3  | 2  | 0  | 0  |
| 0 | 0 | #NULL! | 3  | 2  | 0  | 0  |

|   |   |        |   |    |   |   |
|---|---|--------|---|----|---|---|
| 0 | 0 | #NULL! | 3 | 2  | 0 | 0 |
| 0 | 0 | #NULL! | 4 | 3  | 0 | 1 |
| 0 | 0 | #NULL! | 3 | 3  | 0 | 2 |
| 0 | 0 | #NULL! | 1 | 1  | 0 | 1 |
| 0 | 0 | #NULL! | 1 | 1  | 1 | 0 |
| 0 | 0 | #NULL! | 1 | 1  | 0 | 0 |
| 0 | 0 | #NULL! | 1 | 1  | 0 | 0 |
| 0 | 0 | #NULL! | 2 | 2  | 0 | 0 |
| 0 | 0 | #NULL! | 1 | 1  | 0 | 0 |
| 0 | 0 | #NULL! | 1 | 1  | 0 | 0 |
| 0 | 0 | #NULL! | 3 | 2  | 0 | 0 |
| 0 | 0 | #NULL! | 3 | 4  | 0 | 0 |
| 0 | 0 | #NULL! | 1 | 1  | 0 | 0 |
| 0 | 0 | #NULL! | 1 | 1  | 1 | 1 |
| 0 | 0 | #NULL! | 3 | 2  | 0 | 1 |
| 0 | 0 | #NULL! | 4 | 3  | 0 | 1 |
| 0 | 0 | #NULL! | 4 | 2  | 0 | 0 |
| 0 | 0 | #NULL! | 1 | 2  | 0 | 0 |
| 0 | 0 | #NULL! | 4 | 3  | 0 | 0 |
| 0 | 0 | #NULL! | 3 | 2  | 0 | 0 |
| 0 | 0 | #NULL! | 1 | 1  | 0 | 0 |
| 0 | 0 | #NULL! | 3 | 2  | 0 | 0 |
| 0 | 0 | #NULL! | 1 | 1  | 0 | 0 |
| 0 | 0 | #NULL! | 1 | 2  | 1 | 0 |
| 0 | 0 | #NULL! | 1 | 1  | 1 | 2 |
| 0 | 0 | #NULL! | 3 | 2  | 0 | 0 |
| 0 | 0 | #NULL! | 3 | 2  | 0 | 0 |
| 0 | 0 | #NULL! | 3 | 3  | 0 | 1 |
| 0 | 0 | #NULL! | 3 | 2  | 0 | 0 |
| 0 | 0 | #NULL! | 1 | 1  | 0 | 0 |
| 0 | 0 | #NULL! | 2 | 1  | 0 | 0 |
| 0 | 0 | #NULL! | 3 | 2  | 0 | 5 |
| 0 | 0 | #NULL! | 2 | 2  | 0 | 0 |
| 0 | 0 | #NULL! | 1 | 1  | 1 | 2 |
| 0 | 0 | #NULL! | 3 | 3  | 0 | 0 |
| 0 | 0 | #NULL! | 5 | 4  | 0 | 0 |
| 0 | 0 | #NULL! | 3 | 2  | 0 | 0 |
| 0 | 0 | #NULL! | 1 | 1  | 0 | 0 |
| 0 | 0 | #NULL! | 2 | 2  | 0 | 0 |
| 0 | 0 | #NULL! | 4 | 2  | 0 | 2 |
| 0 | 0 | #NULL! | 1 | 1  | 0 | 0 |
| 0 | 0 | #NULL! | 1 | 1  | 0 | 0 |
| 0 | 0 | #NULL! | 3 | 3  | 0 | 2 |
| 0 | 0 | #NULL! | 1 | 99 | 0 | 0 |
| 0 | 0 | #NULL! | 3 | 2  | 0 | 0 |
| 0 | 0 | #NULL! | 1 | 1  | 0 | 0 |
| 0 | 0 | #NULL! | 3 | 2  | 0 | 0 |
| 0 | 0 | #NULL! | 4 | 1  | 0 | 0 |

|   |   |        |    |    |    |   |
|---|---|--------|----|----|----|---|
| 0 | 0 | #NULL! | 2  | 2  | 0  | 2 |
| 0 | 0 | #NULL! | 99 | 99 | 0  | 0 |
| 0 | 0 | #NULL! | 5  | 3  | 1  | 3 |
| 0 | 0 | #NULL! | 3  | 2  | 0  | 2 |
| 0 | 0 | #NULL! | 1  | 1  | 0  | 0 |
| 0 | 0 | #NULL! | 3  | 2  | 0  | 0 |
| 0 | 1 | #NULL! | 3  | 3  | 0  | 0 |
| 0 | 0 | #NULL! | 3  | 2  | 0  | 0 |
| 0 | 0 | #NULL! | 3  | 4  | 0  | 1 |
| 0 | 0 | #NULL! | 4  | 2  | 0  | 0 |
| 0 | 0 | #NULL! | 1  | 1  | 1  | 3 |
| 0 | 0 | #NULL! | 1  | 2  | 0  | 0 |
| 0 | 0 | #NULL! | 1  | 2  | 0  | 0 |
| 0 | 0 | #NULL! | 3  | 1  | 0  | 0 |
| 0 | 0 | #NULL! | 1  | 1  | 0  | 0 |
| 0 | 0 | #NULL! | 1  | 1  | 0  | 0 |
| 0 | 0 | #NULL! | 1  | 1  | 0  | 0 |
| 0 | 0 | #NULL! | 1  | 1  | 0  | 0 |
| 0 | 0 | #NULL! | 1  | 1  | 0  | 0 |
| 0 | 0 | #NULL! | 1  | 1  | 0  | 0 |
| 0 | 0 | #NULL! | 1  | 1  | 0  | 0 |
| 0 | 0 | #NULL! | 3  | 1  | 0  | 0 |
| 0 | 0 | #NULL! | 3  | 3  | 0  | 0 |
| 0 | 0 | #NULL! | 3  | 1  | 0  | 0 |
| 0 | 0 | #NULL! | 1  | 1  | 0  | 0 |
| 0 | 0 | #NULL! | 2  | 2  | 0  | 0 |
| 0 | 0 | #NULL! | 2  | 2  | 0  | 0 |
| 0 | 1 | #NULL! | 1  | 1  | 0  | 0 |
| 0 | 0 | #NULL! | 3  | 1  | 0  | 0 |
| 0 | 0 | #NULL! | 3  | 3  | 0  | 0 |
| 0 | 0 | #NULL! | 1  | 1  | 0  | 0 |
| 0 | 0 | #NULL! | 99 | 99 | 99 | 0 |
| 0 | 0 | #NULL! | 1  | 1  | 0  | 0 |
| 0 | 0 | #NULL! | 5  | 1  | 0  | 0 |
| 0 | 0 | #NULL! | 3  | 3  | 0  | 0 |
| 0 | 0 | #NULL! | 1  | 1  | 0  | 0 |
| 0 | 0 | #NULL! | 3  | 3  | 0  | 0 |
| 0 | 0 | #NULL! | 3  | 3  | 0  | 0 |
| 0 | 0 | #NULL! | 3  | 2  | 0  | 0 |
| 0 | 0 | #NULL! | 3  | 3  | 0  | 0 |
| 0 | 0 | #NULL! | 1  | 1  | 0  | 0 |
| 0 | 0 | #NULL! | 3  | 3  | 0  | 0 |
| 0 | 0 | #NULL! | 1  | 1  | 0  | 0 |
| 0 | 0 | #NULL! | 3  | 3  | 0  | 0 |
| 0 | 0 | #NULL! | 1  | 1  | 0  | 0 |
| 0 | 0 | #NULL! | 2  | 2  | 0  | 0 |
| 0 | 0 | #NULL! | 1  | 1  | 0  | 0 |
| 0 | 0 | #NULL! | 3  | 3  | 0  | 0 |
| 0 | 0 | #NULL! | 3  | 2  | 0  | 0 |

|   |   |        |   |    |   |   |
|---|---|--------|---|----|---|---|
| 0 | 0 | #NULL! | 3 | 1  | 0 | 0 |
| 0 | 0 | #NULL! | 4 | 3  | 0 | 0 |
| 0 | 0 | #NULL! | 3 | 1  | 0 | 0 |
| 0 | 0 | #NULL! | 3 | 3  | 0 | 0 |
| 0 | 0 | #NULL! | 1 | 1  | 0 | 0 |
| 0 | 0 | #NULL! | 1 | 1  | 0 | 0 |
| 0 | 0 | #NULL! | 3 | 3  | 0 | 0 |
| 0 | 0 | #NULL! | 1 | 1  | 0 | 0 |
| 0 | 0 | #NULL! | 1 | 1  | 0 | 0 |
| 0 | 0 | #NULL! | 2 | 1  | 0 | 0 |
| 0 | 0 | #NULL! | 2 | 2  | 0 | 0 |
| 0 | 0 | #NULL! | 3 | 1  | 0 | 0 |
| 0 | 0 | #NULL! | 1 | 1  | 0 | 0 |
| 0 | 0 | #NULL! | 1 | 2  | 0 | 0 |
| 0 | 0 | #NULL! | 1 | 1  | 0 | 0 |
| 0 | 0 | #NULL! | 1 | 1  | 1 | 0 |
| 0 | 0 | #NULL! | 1 | 2  | 1 | 1 |
| 0 | 0 | #NULL! | 1 | 1  | 0 | 0 |
| 0 | 0 | #NULL! | 2 | 1  | 1 | 1 |
| 0 | 0 | #NULL! | 1 | 1  | 2 | 2 |
| 0 | 0 | #NULL! | 1 | 2  | 1 | 2 |
| 0 | 0 | #NULL! | 4 | 3  | 1 | 3 |
| 0 | 0 | #NULL! | 3 | 3  | 2 | 0 |
| 0 | 0 | #NULL! | 3 | 3  | 0 | 0 |
| 0 | 0 | #NULL! | 3 | 2  | 0 | 1 |
| 0 | 0 | #NULL! | 4 | 1  | 0 | 0 |
| 0 | 0 | #NULL! | 1 | 1  | 1 | 1 |
| 0 | 0 | #NULL! | 4 | 99 | 0 | 0 |
| 0 | 0 | #NULL! | 3 | 3  | 0 | 1 |
| 0 | 0 | #NULL! | 1 | 1  | 0 | 0 |
| 0 | 0 | #NULL! | 2 | 2  | 0 | 0 |
| 0 | 0 | #NULL! | 1 | 1  | 0 | 0 |
| 0 | 0 | #NULL! | 3 | 3  | 0 | 5 |
| 0 | 0 | #NULL! | 3 | 2  | 0 | 0 |
| 0 | 0 | #NULL! | 4 | 3  | 0 | 0 |
| 0 | 0 | #NULL! | 3 | 2  | 0 | 0 |
| 0 | 0 | #NULL! | 1 | 1  | 0 | 0 |
| 0 | 0 | #NULL! | 1 | 1  | 0 | 0 |
| 0 | 0 | #NULL! | 2 | 1  | 0 | 0 |
| 0 | 0 | #NULL! | 3 | 3  | 0 | 0 |
| 0 | 0 | #NULL! | 2 | 3  | 3 | 4 |
| 0 | 0 | #NULL! | 4 | 1  | 0 | 0 |
| 0 | 0 | #NULL! | 1 | 1  | 0 | 0 |
| 0 | 0 | #NULL! | 1 | 1  | 0 | 0 |
| 0 | 0 | #NULL! | 3 | 1  | 0 | 0 |
| 0 | 0 | #NULL! | 3 | 2  | 0 | 0 |
| 0 | 0 | #NULL! | 3 | 3  | 0 | 0 |
| 0 | 0 | #NULL! | 1 | 1  | 0 | 0 |

|   |   |        |   |   |    |    |
|---|---|--------|---|---|----|----|
| 0 | 0 | #NULL! | 4 | 2 | 0  | 0  |
| 0 | 0 | #NULL! | 3 | 3 | 0  | 0  |
| 0 | 0 | #NULL! | 4 | 3 | 0  | 0  |
| 0 | 0 | #NULL! | 3 | 2 | 0  | 0  |
| 0 | 0 | #NULL! | 1 | 1 | 0  | 0  |
| 0 | 0 | #NULL! | 3 | 2 | 0  | 1  |
| 0 | 0 | #NULL! | 1 | 1 | 0  | 0  |
| 0 | 0 | #NULL! | 1 | 1 | 2  | 1  |
| 0 | 0 | #NULL! | 4 | 3 | 99 | 99 |
| 0 | 0 | #NULL! | 3 | 3 | 0  | 0  |
| 0 | 0 | #NULL! | 1 | 1 | 5  | 5  |
| 0 | 0 | #NULL! | 3 | 3 | 2  | 5  |
| 0 | 0 | #NULL! | 4 | 2 | 0  | 0  |
| 0 | 0 | #NULL! | 2 | 1 | 2  | 3  |
| 0 | 0 | #NULL! | 2 | 1 | 0  | 1  |
| 0 | 0 | #NULL! | 1 | 1 | 0  | 0  |
| 0 | 0 | #NULL! | 3 | 3 | 0  | 1  |
| 1 | 0 | #NULL! | 2 | 2 | 0  | 0  |
| 0 | 0 | #NULL! | 1 | 1 | 1  | 1  |
| 0 | 0 | #NULL! | 3 | 1 | 0  | 0  |
| 0 | 0 | #NULL! | 3 | 2 | 0  | 1  |
| 0 | 0 | #NULL! | 2 | 2 | 0  | 0  |
| 0 | 0 | #NULL! | 1 | 1 | 0  | 0  |
| 0 | 0 | #NULL! | 2 | 1 | 0  | 0  |
| 0 | 0 | #NULL! | 3 | 3 | 0  | 0  |
| 0 | 0 | #NULL! | 1 | 1 | 0  | 0  |
| 0 | 0 | #NULL! | 3 | 3 | 0  | 1  |
| 0 | 0 | #NULL! | 1 | 1 | 0  | 0  |
| 0 | 0 | #NULL! | 1 | 2 | 0  | 0  |
| 0 | 0 | #NULL! | 1 | 1 | 0  | 0  |
| 0 | 0 | #NULL! | 4 | 2 | 0  | 0  |
| 0 | 0 | #NULL! | 3 | 2 | 0  | 0  |
| 0 | 0 | #NULL! | 3 | 3 | 99 | 99 |
| 0 | 0 | #NULL! | 1 | 1 | 0  | 0  |
| 0 | 0 | #NULL! | 3 | 2 | 0  | 0  |
| 0 | 0 | #NULL! | 1 | 1 | 0  | 0  |
| 0 | 0 | #NULL! | 3 | 3 | 0  | 0  |
| 0 | 0 | #NULL! | 1 | 1 | 99 | 0  |
| 0 | 0 | #NULL! | 1 | 1 | 0  | 0  |
| 0 | 0 | #NULL! | 2 | 1 | 0  | 0  |
| 0 | 0 | #NULL! | 1 | 1 | 0  | 0  |
| 0 | 0 | #NULL! | 2 | 2 | 0  | 0  |
| 0 | 0 | #NULL! | 1 | 1 | 0  | 0  |
| 0 | 0 | #NULL! | 4 | 3 | 0  | 0  |
| 0 | 0 | #NULL! | 4 | 4 | 0  | 0  |
| 0 | 0 | #NULL! | 1 | 2 | 1  | 0  |
| 0 | 0 | #NULL! | 5 | 2 | 0  | 0  |
| 0 | 0 | #NULL! | 4 | 3 | 0  | 0  |

|   |   |        |   |    |    |    |
|---|---|--------|---|----|----|----|
| 0 | 0 | #NULL! | 1 | 1  | 0  | 0  |
| 0 | 0 | #NULL! | 3 | 2  | 0  | 0  |
| 0 | 0 | #NULL! | 1 | 1  | 0  | 0  |
| 0 | 0 | #NULL! | 3 | 1  | 0  | 0  |
| 0 | 0 | #NULL! | 4 | 1  | 0  | 0  |
| 0 | 0 | #NULL! | 1 | 1  | 0  | 0  |
| 0 | 0 | #NULL! | 1 | 1  | 0  | 0  |
| 0 | 0 | #NULL! | 1 | 1  | 0  | 0  |
| 0 | 0 | #NULL! | 3 | 3  | 0  | 0  |
| 1 | 0 | #NULL! | 3 | 3  | 0  | 0  |
| 0 | 0 | #NULL! | 3 | 2  | 0  | 0  |
| 0 | 0 | #NULL! | 1 | 1  | 0  | 1  |
| 0 | 0 | #NULL! | 2 | 2  | 0  | 0  |
| 0 | 0 | #NULL! | 1 | 1  | 0  | 0  |
| 0 | 0 | #NULL! | 3 | 2  | 0  | 0  |
| 1 | 0 | #NULL! | 1 | 99 | 0  | 0  |
| 0 | 0 | #NULL! | 1 | 1  | 0  | 0  |
| 0 | 0 | #NULL! | 3 | 2  | 99 | 99 |
| 0 | 0 | #NULL! | 1 | 1  | 0  | 0  |
| 0 | 0 | #NULL! | 3 | 3  | 0  | 0  |
| 0 | 0 | #NULL! | 1 | 1  | 0  | 0  |
| 0 | 0 | #NULL! | 3 | 2  | 0  | 0  |
| 0 | 0 | #NULL! | 1 | 1  | 0  | 0  |
| 0 | 0 | #NULL! | 1 | 1  | 0  | 0  |
| 0 | 0 | #NULL! | 4 | 2  | 0  | 0  |
| 0 | 0 | #NULL! | 1 | 1  | 1  | 1  |
| 0 | 0 | #NULL! | 3 | 2  | 0  | 0  |
| 0 | 0 | #NULL! | 1 | 1  | 1  | 2  |
| 0 | 0 | #NULL! | 2 | 2  | 0  | 0  |
| 0 | 0 | #NULL! | 1 | 1  | 1  | 5  |
| 0 | 0 | #NULL! | 3 | 2  | 0  | 0  |
| 0 | 0 | #NULL! | 3 | 2  | 0  | 0  |
| 0 | 0 | #NULL! | 2 | 1  | 0  | 0  |
| 0 | 0 | #NULL! | 3 | 2  | 0  | 0  |
| 0 | 0 | #NULL! | 1 | 3  | 0  | 0  |
| 0 | 0 | #NULL! | 3 | 3  | 0  | 0  |
| 0 | 0 | #NULL! | 3 | 1  | 0  | 0  |
| 0 | 0 | #NULL! | 2 | 2  | 0  | 0  |
| 0 | 0 | #NULL! | 1 | 1  | 0  | 0  |
| 0 | 0 | #NULL! | 3 | 2  | 0  | 0  |
| 0 | 0 | #NULL! | 3 | 3  | 0  | 0  |
| 0 | 0 | #NULL! | 3 | 1  | 0  | 0  |
| 0 | 0 | #NULL! | 1 | 1  | 0  | 0  |
| 0 | 0 | #NULL! | 3 | 3  | 0  | 1  |
| 0 | 0 | #NULL! | 3 | 2  | 1  | 0  |
| 0 | 0 | #NULL! | 3 | 3  | 1  | 1  |
| 0 | 0 | #NULL! | 3 | 3  | 0  | 1  |
| 0 | 0 | #NULL! | 3 | 2  | 1  | 3  |

|   |   |        |    |   |   |    |
|---|---|--------|----|---|---|----|
| 0 | 0 | #NULL! | 4  | 3 | 0 | 0  |
| 0 | 0 | #NULL! | 3  | 3 | 0 | 0  |
| 0 | 0 | #NULL! | 1  | 1 | 0 | 0  |
| 0 | 0 | #NULL! | 4  | 3 | 0 | 0  |
| 0 | 0 | #NULL! | 1  | 1 | 0 | 0  |
| 0 | 0 | #NULL! | 4  | 3 | 0 | 1  |
| 0 | 0 | #NULL! | 3  | 2 | 0 | 0  |
| 0 | 0 | #NULL! | 1  | 1 | 0 | 0  |
| 0 | 0 | #NULL! | 1  | 2 | 0 | 0  |
| 0 | 0 | #NULL! | 3  | 3 | 1 | 4  |
| 0 | 0 | #NULL! | 1  | 1 | 0 | 0  |
| 0 | 0 | #NULL! | 1  | 1 | 5 | 4  |
| 0 | 0 | #NULL! | 3  | 2 | 0 | 99 |
| 0 | 0 | #NULL! | 3  | 3 | 0 | 0  |
| 0 | 0 | #NULL! | 1  | 1 | 0 | 0  |
| 0 | 0 | #NULL! | 1  | 1 | 0 | 0  |
| 0 | 0 | #NULL! | 3  | 3 | 0 | 0  |
| 0 | 0 | #NULL! | 2  | 3 | 0 | 0  |
| 0 | 0 | #NULL! | 2  | 2 | 1 | 1  |
| 0 | 0 | #NULL! | 4  | 3 | 0 | 1  |
| 0 | 0 | #NULL! | 2  | 1 | 0 | 0  |
| 0 | 0 | #NULL! | 1  | 1 | 1 | 1  |
| 0 | 0 | #NULL! | 2  | 1 | 0 | 2  |
| 0 | 0 | #NULL! | 2  | 2 | 0 | 3  |
| 0 | 0 | #NULL! | 2  | 2 | 0 | 1  |
| 0 | 0 | #NULL! | 1  | 1 | 1 | 1  |
| 0 | 0 | #NULL! | 3  | 2 | 4 | 4  |
| 0 | 0 | #NULL! | 99 | 1 | 0 | 0  |
| 0 | 0 | #NULL! | 1  | 1 | 0 | 0  |
| 0 | 0 | #NULL! | 99 | 1 | 0 | 0  |
| 1 | 0 | #NULL! | 3  | 2 | 2 | 2  |
| 0 | 0 | #NULL! | 3  | 2 | 0 | 0  |
| 0 | 0 | #NULL! | 2  | 2 | 1 | 1  |
| 0 | 0 | #NULL! | 4  | 3 | 0 | 0  |
| 0 | 0 | #NULL! | 3  | 3 | 0 | 1  |
| 0 | 0 | #NULL! | 3  | 3 | 0 | 0  |
| 0 | 0 | #NULL! | 3  | 4 | 0 | 3  |
| 0 | 0 | #NULL! | 3  | 2 | 0 | 2  |
| 0 | 0 | #NULL! | 1  | 1 | 0 | 0  |
| 0 | 0 | #NULL! | 1  | 1 | 0 | 0  |
| 0 | 0 | #NULL! | 2  | 1 | 0 | 0  |
| 0 | 0 | #NULL! | 3  | 2 | 0 | 99 |
| 1 | 0 | #NULL! | 3  | 3 | 0 | 0  |
| 0 | 0 | #NULL! | 3  | 3 | 0 | 0  |
| 0 | 0 | #NULL! | 1  | 2 | 0 | 0  |
| 0 | 0 | #NULL! | 3  | 3 | 0 | 0  |
| 0 | 0 | #NULL! | 4  | 2 | 0 | 0  |
| 0 | 0 | #NULL! | 2  | 2 | 0 | 0  |

|   |   |        |    |    |   |   |
|---|---|--------|----|----|---|---|
| 0 | 0 | #NULL! | 3  | 2  | 0 | 0 |
| 0 | 0 | #NULL! | 2  | 1  | 0 | 3 |
| 0 | 0 | #NULL! | 1  | 1  | 0 | 0 |
| 0 | 0 | #NULL! | 1  | 1  | 0 | 0 |
| 0 | 0 | #NULL! | 1  | 1  | 0 | 0 |
| 0 | 0 | #NULL! | 99 | 99 | 0 | 0 |
| 0 | 0 | #NULL! | 3  | 1  | 0 | 0 |
| 0 | 0 | #NULL! | 4  | 1  | 0 | 0 |
| 0 | 0 | #NULL! | 1  | 1  | 0 | 0 |
| 0 | 0 | #NULL! | 4  | 3  | 0 | 0 |
| 0 | 0 | #NULL! | 1  | 1  | 0 | 0 |
| 0 | 0 | #NULL! | 1  | 1  | 0 | 0 |
| 0 | 0 | #NULL! | 2  | 2  | 0 | 0 |
| 0 | 0 | #NULL! | 1  | 1  | 0 | 0 |
| 0 | 0 | #NULL! | 3  | 2  | 0 | 0 |
| 0 | 0 | #NULL! | 3  | 3  | 1 | 1 |
| 0 | 0 | #NULL! | 4  | 2  | 0 | 1 |
| 0 | 0 | #NULL! | 3  | 3  | 0 | 0 |
| 0 | 0 | #NULL! | 3  | 99 | 1 | 4 |
| 0 | 0 | #NULL! | 99 | 99 | 0 | 0 |
| 0 | 0 | #NULL! | 3  | 3  | 0 | 2 |
| 0 | 0 | #NULL! | 2  | 1  | 0 | 0 |
| 0 | 0 | #NULL! | 1  | 1  | 1 | 4 |
| 0 | 0 | #NULL! | 3  | 3  | 0 | 1 |
| 0 | 0 | #NULL! | 5  | 3  | 0 | 1 |
| 0 | 0 | #NULL! | 4  | 2  | 0 | 1 |
| 0 | 0 | #NULL! | 3  | 3  | 0 | 0 |
| 0 | 0 | #NULL! | 1  | 1  | 0 | 0 |
| 0 | 0 | #NULL! | 3  | 1  | 0 | 0 |
| 1 | 0 | #NULL! | 2  | 1  | 0 | 0 |
| 0 | 0 | #NULL! | 1  | 1  | 0 | 0 |
| 0 | 0 | #NULL! | 3  | 3  | 0 | 1 |
| 0 | 0 | #NULL! | 2  | 1  | 0 | 0 |
| 0 | 0 | #NULL! | 3  | 2  | 0 | 0 |
| 0 | 0 | #NULL! | 1  | 1  | 1 | 1 |
| 0 | 0 | #NULL! | 1  | 1  | 0 | 0 |
| 0 | 0 | #NULL! | 3  | 3  | 1 | 2 |
| 0 | 0 | #NULL! | 4  | 3  | 0 | 0 |
| 0 | 0 | #NULL! | 2  | 2  | 0 | 0 |
| 0 | 0 | #NULL! | 1  | 1  | 0 | 0 |
| 0 | 0 | #NULL! | 5  | 4  | 0 | 0 |
| 0 | 0 | #NULL! | 3  | 2  | 0 | 0 |
| 0 | 0 | #NULL! | 1  | 1  | 0 | 0 |
| 0 | 0 | #NULL! | 3  | 3  | 0 | 1 |
| 0 | 0 | #NULL! | 3  | 2  | 1 | 4 |
| 0 | 0 | #NULL! | 3  | 3  | 0 | 0 |
| 0 | 0 | #NULL! | 4  | 3  | 2 | 4 |
| 0 | 0 | #NULL! | 4  | 4  | 0 | 2 |



|   |   |        |   |   |   |   |
|---|---|--------|---|---|---|---|
| 0 | 0 | #NULL! | 1 | 1 | 0 | 0 |
| 1 | 0 | #NULL! | 4 | 3 | 1 | 3 |
| 0 | 0 | #NULL! | 4 | 3 | 0 | 0 |
| 0 | 0 | #NULL! | 2 | 1 | 0 | 0 |
| 0 | 0 | #NULL! | 1 | 1 | 0 | 0 |
| 0 | 0 | #NULL! | 4 | 3 | 0 | 1 |
| 0 | 0 | #NULL! | 3 | 2 | 0 | 0 |
| 1 | 0 | #NULL! | 2 | 2 | 0 | 0 |
| 0 | 0 | #NULL! | 1 | 1 | 0 | 0 |
| 0 | 0 | #NULL! | 3 | 2 | 0 | 0 |
| 0 | 0 | #NULL! | 1 | 1 | 0 | 1 |
| 0 | 0 | #NULL! | 4 | 1 | 0 | 0 |
| 0 | 0 | #NULL! | 1 | 1 | 0 | 1 |
| 0 | 0 | #NULL! | 1 | 1 | 0 | 0 |
| 0 | 0 | #NULL! | 1 | 1 | 1 | 2 |
| 0 | 0 | #NULL! | 1 | 1 | 0 | 0 |
| 0 | 0 | #NULL! | 3 | 3 | 0 | 3 |
| 0 | 0 | #NULL! | 3 | 3 | 0 | 1 |
| 0 | 0 | #NULL! | 1 | 1 | 1 | 1 |
| 0 | 0 | #NULL! | 2 | 1 | 0 | 0 |
| 0 | 0 | #NULL! | 3 | 3 | 0 | 0 |
| 0 | 0 | #NULL! | 3 | 3 | 0 | 0 |
| 0 | 0 | #NULL! | 4 | 2 | 0 | 0 |
| 0 | 0 | #NULL! | 5 | 5 | 0 | 0 |
| 0 | 0 | #NULL! | 3 | 3 | 0 | 1 |
| 0 | 0 | #NULL! | 1 | 1 | 0 | 0 |
| 0 | 0 | #NULL! | 1 | 1 | 0 | 0 |
| 0 | 0 | #NULL! | 1 | 1 | 0 | 0 |
| 0 | 0 | #NULL! | 4 | 3 | 0 | 0 |
| 0 | 0 | #NULL! | 1 | 1 | 0 | 0 |
| 0 | 0 | #NULL! | 2 | 1 | 1 | 3 |
| 0 | 0 | #NULL! | 3 | 1 | 0 | 0 |
| 0 | 0 | #NULL! | 1 | 1 | 0 | 0 |
| 0 | 0 | #NULL! | 4 | 2 | 0 | 0 |
| 0 | 0 | #NULL! | 1 | 1 | 0 | 0 |
| 0 | 0 | #NULL! | 1 | 1 | 0 | 0 |
| 0 | 1 | #NULL! | 4 | 2 | 0 | 0 |
| 0 | 0 | #NULL! | 3 | 2 | 0 | 0 |
| 0 | 0 | #NULL! | 1 | 1 | 0 | 0 |
| 0 | 0 | #NULL! | 2 | 2 | 0 | 0 |
| 0 | 0 | #NULL! | 4 | 3 | 0 | 0 |
| 0 | 0 | #NULL! | 2 | 2 | 0 | 0 |
| 0 | 0 | #NULL! | 1 | 1 | 2 | 5 |
| 0 | 0 | #NULL! | 3 | 3 | 0 | 0 |
| 0 | 0 | #NULL! | 3 | 3 | 0 | 0 |
| 1 | 0 | #NULL! | 2 | 1 | 2 | 4 |
| 0 | 0 | #NULL! | 3 | 2 | 0 | 1 |
| 0 | 0 | #NULL! | 3 | 3 | 0 | 0 |

|   |   |        |    |    |   |   |
|---|---|--------|----|----|---|---|
| 0 | 0 | #NULL! | 1  | 1  | 0 | 0 |
| 0 | 0 | #NULL! | 3  | 1  | 0 | 0 |
| 0 | 0 | #NULL! | 3  | 2  | 0 | 0 |
| 0 | 0 | #NULL! | 1  | 1  | 0 | 0 |
| 0 | 0 | #NULL! | 99 | 99 | 5 | 5 |
| 0 | 0 | #NULL! | 3  | 2  | 1 | 1 |
| 0 | 0 | #NULL! | 1  | 1  | 0 | 0 |
| 0 | 0 | #NULL! | 1  | 1  | 0 | 0 |
| 0 | 0 | #NULL! | 3  | 2  | 0 | 0 |
| 0 | 0 | #NULL! | 1  | 1  | 0 | 0 |
| 0 | 0 | #NULL! | 3  | 2  | 0 | 1 |
| 0 | 0 | #NULL! | 1  | 1  | 0 | 0 |
| 0 | 0 | #NULL! | 4  | 4  | 0 | 0 |
| 0 | 0 | #NULL! | 3  | 1  | 0 | 0 |
| 0 | 0 | #NULL! | 3  | 3  | 0 | 0 |
| 0 | 0 | #NULL! | 4  | 5  | 1 | 3 |
| 0 | 0 | #NULL! | 3  | 3  | 0 | 0 |
| 0 | 0 | #NULL! | 3  | 3  | 0 | 0 |
| 0 | 0 | #NULL! | 4  | 2  | 0 | 2 |
| 0 | 0 | #NULL! | 2  | 1  | 0 | 0 |
| 0 | 0 | #NULL! | 1  | 1  | 0 | 0 |
| 0 | 0 | #NULL! | 3  | 3  | 0 | 0 |
| 0 | 0 | #NULL! | 4  | 3  | 0 | 0 |
| 0 | 0 | #NULL! | 1  | 1  | 0 | 0 |
| 0 | 0 | #NULL! | 1  | 2  | 1 | 0 |
| 0 | 0 | #NULL! | 1  | 1  | 0 | 0 |
| 0 | 0 | #NULL! | 3  | 3  | 1 | 1 |
| 0 | 0 | #NULL! | 2  | 2  | 0 | 0 |
| 0 | 0 | #NULL! | 1  | 1  | 0 | 0 |
| 0 | 0 | #NULL! | 3  | 3  | 0 | 0 |
| 0 | 0 | #NULL! | 3  | 1  | 0 | 0 |
| 0 | 0 | #NULL! | 3  | 2  | 5 | 1 |
| 0 | 0 | #NULL! | 4  | 3  | 0 | 0 |
| 0 | 0 | #NULL! | 3  | 3  | 0 | 0 |
| 0 | 0 | #NULL! | 3  | 3  | 0 | 0 |
| 0 | 0 | #NULL! | 3  | 1  | 0 | 0 |
| 0 | 0 | #NULL! | 1  | 2  | 1 | 2 |
| 0 | 0 | #NULL! | 1  | 1  | 0 | 0 |
| 1 | 0 | #NULL! | 3  | 2  | 0 | 0 |
| 0 | 0 | #NULL! | 5  | 5  | 0 | 0 |
| 0 | 0 | #NULL! | 1  | 1  | 0 | 0 |
| 0 | 0 | #NULL! | 5  | 1  | 0 | 0 |
| 0 | 0 | #NULL! | 1  | 2  | 0 | 0 |
| 0 | 0 | #NULL! | 3  | 2  | 0 | 0 |
| 0 | 0 | #NULL! | 2  | 2  | 0 | 0 |
| 0 | 0 | #NULL! | 1  | 1  | 0 | 0 |
| 0 | 0 | #NULL! | 3  | 2  | 0 | 0 |
| 0 | 0 | #NULL! | 3  | 3  | 0 | 0 |

|   |   |        |   |   |   |   |
|---|---|--------|---|---|---|---|
| 0 | 0 | #NULL! | 1 | 1 | 0 | 0 |
| 0 | 0 | #NULL! | 3 | 3 | 0 | 0 |
| 0 | 0 | #NULL! | 1 | 2 | 0 | 0 |
| 0 | 0 | #NULL! | 1 | 1 | 0 | 0 |
| 0 | 0 | #NULL! | 3 | 1 | 0 | 1 |
| 0 | 0 | #NULL! | 3 | 3 | 0 | 0 |
| 0 | 0 | #NULL! | 3 | 3 | 0 | 0 |
| 0 | 0 | #NULL! | 1 | 1 | 0 | 0 |
| 0 | 0 | #NULL! | 3 | 3 | 0 | 2 |
| 0 | 0 | #NULL! | 3 | 3 | 0 | 0 |
| 0 | 0 | #NULL! | 1 | 1 | 0 | 0 |
| 0 | 0 | #NULL! | 1 | 2 | 0 | 0 |
| 0 | 0 | #NULL! | 1 | 1 | 0 | 1 |
| 0 | 0 | #NULL! | 1 | 1 | 2 | 4 |
| 0 | 0 | #NULL! | 1 | 2 | 0 | 0 |
| 0 | 0 | #NULL! | 1 | 2 | 0 | 0 |
| 0 | 0 | #NULL! | 3 | 3 | 0 | 0 |
| 0 | 0 | #NULL! | 1 | 1 | 0 | 0 |
| 0 | 0 | #NULL! | 3 | 2 | 0 | 0 |
| 0 | 0 | #NULL! | 3 | 2 | 0 | 0 |
| 0 | 0 | #NULL! | 1 | 1 | 0 | 1 |
| 0 | 0 | #NULL! | 1 | 2 | 0 | 0 |
| 0 | 0 | #NULL! | 3 | 1 | 0 | 0 |
| 0 | 0 | #NULL! | 1 | 1 | 1 | 2 |
| 0 | 0 | #NULL! | 4 | 3 | 2 | 4 |
| 0 | 0 | #NULL! | 3 | 2 | 0 | 0 |
| 0 | 0 | #NULL! | 1 | 1 | 0 | 3 |
| 0 | 0 | #NULL! | 3 | 2 | 0 | 0 |
| 0 | 0 | #NULL! | 2 | 1 | 0 | 1 |
| 0 | 0 | #NULL! | 2 | 1 | 0 | 0 |
| 0 | 0 | #NULL! | 3 | 2 | 0 | 0 |
| 0 | 0 | #NULL! | 1 | 1 | 0 | 0 |
| 0 | 0 | #NULL! | 3 | 2 | 1 | 1 |
| 0 | 0 | #NULL! | 1 | 1 | 0 | 0 |
| 0 | 0 | #NULL! | 4 | 3 | 0 | 0 |
| 0 | 0 | #NULL! | 5 | 1 | 0 | 2 |
| 0 | 0 | #NULL! | 3 | 3 | 0 | 1 |
| 0 | 0 | #NULL! | 1 | 1 | 0 | 2 |
| 0 | 0 | #NULL! | 4 | 2 | 0 | 0 |
| 0 | 0 | #NULL! | 3 | 2 | 1 | 3 |
| 0 | 0 | #NULL! | 1 | 1 | 0 | 0 |
| 0 | 0 | #NULL! | 3 | 3 | 0 | 1 |
| 0 | 0 | #NULL! | 3 | 3 | 0 | 0 |
| 0 | 0 | #NULL! | 2 | 3 | 0 | 0 |
| 0 | 0 | #NULL! | 3 | 3 | 0 | 0 |
| 0 | 0 | #NULL! | 3 | 3 | 0 | 0 |
| 0 | 0 | #NULL! | 4 | 1 | 0 | 0 |
| 0 | 0 | #NULL! | 1 | 1 | 0 | 0 |

|   |   |        |   |    |   |    |
|---|---|--------|---|----|---|----|
| 0 | 0 | #NULL! | 2 | 1  | 0 | 1  |
| 0 | 0 | #NULL! | 3 | 2  | 0 | 1  |
| 0 | 0 | #NULL! | 3 | 3  | 0 | 99 |
| 0 | 0 | #NULL! | 2 | 1  | 0 | 0  |
| 0 | 0 | #NULL! | 1 | 1  | 0 | 0  |
| 0 | 0 | #NULL! | 2 | 2  | 0 | 0  |
| 0 | 0 | #NULL! | 5 | 1  | 0 | 0  |
| 0 | 0 | #NULL! | 1 | 1  | 0 | 0  |
| 0 | 0 | #NULL! | 3 | 3  | 0 | 0  |
| 0 | 0 | #NULL! | 4 | 3  | 3 | 4  |
| 0 | 0 | #NULL! | 4 | 1  | 0 | 0  |
| 0 | 0 | #NULL! | 3 | 2  | 0 | 3  |
| 0 | 0 | #NULL! | 4 | 2  | 0 | 0  |
| 1 | 0 | #NULL! | 2 | 99 | 0 | 1  |
| 0 | 0 | #NULL! | 1 | 1  | 0 | 0  |
| 0 | 0 | #NULL! | 4 | 3  | 0 | 1  |
| 0 | 0 | #NULL! | 1 | 1  | 0 | 0  |
| 0 | 0 | #NULL! | 1 | 1  | 0 | 0  |
| 0 | 0 | #NULL! | 1 | 2  | 5 | 5  |
| 0 | 0 | #NULL! | 1 | 1  | 0 | 0  |
| 0 | 0 | #NULL! | 3 | 3  | 1 | 1  |
| 1 | 0 | #NULL! | 3 | 2  | 0 | 0  |
| 0 | 0 | #NULL! | 1 | 1  | 0 | 0  |
| 0 | 0 | #NULL! | 1 | 1  | 0 | 0  |
| 0 | 0 | #NULL! | 1 | 1  | 0 | 0  |
| 0 | 0 | #NULL! | 2 | 1  | 2 | 4  |
| 0 | 0 | #NULL! | 2 | 2  | 0 | 0  |
| 0 | 0 | #NULL! | 3 | 3  | 0 | 0  |
| 0 | 0 | #NULL! | 1 | 1  | 0 | 0  |
| 0 | 0 | #NULL! | 4 | 99 | 2 | 3  |
| 0 | 0 | #NULL! | 3 | 2  | 0 | 0  |
| 0 | 0 | #NULL! | 3 | 3  | 0 | 0  |
| 1 | 0 | #NULL! | 2 | 1  | 0 | 0  |
| 0 | 0 | #NULL! | 1 | 1  | 0 | 0  |
| 0 | 0 | #NULL! | 3 | 2  | 0 | 0  |
| 0 | 0 | #NULL! | 1 | 1  | 0 | 0  |
| 0 | 0 | #NULL! | 1 | 1  | 0 | 0  |
| 0 | 0 | #NULL! | 4 | 3  | 0 | 0  |
| 0 | 0 | #NULL! | 1 | 1  | 0 | 0  |
| 0 | 0 | #NULL! | 1 | 1  | 0 | 0  |
| 0 | 0 | #NULL! | 1 | 1  | 0 | 0  |
| 0 | 0 | #NULL! | 1 | 1  | 0 | 0  |
| 0 | 0 | #NULL! | 1 | 1  | 0 | 1  |
| 0 | 0 | #NULL! | 3 | 2  | 0 | 0  |
| 0 | 0 | #NULL! | 1 | 1  | 0 | 0  |
| 0 | 0 | #NULL! | 1 | 1  | 4 | 2  |
| 0 | 0 | #NULL! | 1 | 4  | 1 | 1  |
| 0 | 0 | #NULL! | 4 | 3  | 0 | 0  |

|   |   |        |    |   |    |    |
|---|---|--------|----|---|----|----|
| 0 | 0 | #NULL! | 2  | 1 | 1  | 1  |
| 0 | 0 | #NULL! | 5  | 1 | 0  | 0  |
| 0 | 0 | #NULL! | 3  | 2 | 0  | 0  |
| 0 | 0 | #NULL! | 4  | 3 | 0  | 99 |
| 0 | 0 | #NULL! | 3  | 2 | 0  | 0  |
| 0 | 0 | #NULL! | 3  | 2 | 0  | 0  |
| 0 | 0 | #NULL! | 3  | 3 | 0  | 0  |
| 0 | 0 | #NULL! | 2  | 1 | 0  | 0  |
| 0 | 0 | #NULL! | 1  | 1 | 0  | 0  |
| 0 | 0 | #NULL! | 1  | 2 | 0  | 1  |
| 0 | 0 | #NULL! | 3  | 3 | 0  | 0  |
| 0 | 0 | #NULL! | 99 | 3 | 0  | 0  |
| 0 | 0 | #NULL! | 3  | 3 | 0  | 5  |
| 0 | 0 | #NULL! | 3  | 2 | 0  | 1  |
| 0 | 0 | #NULL! | 3  | 3 | 0  | 0  |
| 0 | 0 | #NULL! | 3  | 3 | 0  | 0  |
| 0 | 0 | #NULL! | 1  | 1 | 0  | 0  |
| 0 | 0 | #NULL! | 1  | 1 | 0  | 0  |
| 0 | 0 | #NULL! | 4  | 2 | 0  | 0  |
| 0 | 0 | #NULL! | 5  | 4 | 0  | 0  |
| 0 | 0 | #NULL! | 1  | 1 | 1  | 1  |
| 0 | 0 | #NULL! | 1  | 1 | 0  | 0  |
| 0 | 0 | #NULL! | 4  | 2 | 0  | 3  |
| 0 | 0 | #NULL! | 3  | 2 | 0  | 0  |
| 0 | 0 | #NULL! | 2  | 3 | 0  | 0  |
| 0 | 0 | #NULL! | 3  | 2 | 0  | 0  |
| 0 | 0 | #NULL! | 3  | 3 | 0  | 1  |
| 0 | 0 | #NULL! | 1  | 1 | 0  | 0  |
| 0 | 0 | #NULL! | 4  | 3 | 0  | 0  |
| 0 | 0 | #NULL! | 1  | 1 | 0  | 0  |
| 0 | 0 | #NULL! | 3  | 3 | 0  | 1  |
| 1 | 0 | #NULL! | 3  | 2 | 0  | 0  |
| 0 | 0 | #NULL! | 3  | 2 | 0  | 0  |
| 0 | 0 | #NULL! | 1  | 1 | 0  | 0  |
| 0 | 0 | #NULL! | 3  | 2 | 0  | 1  |
| 0 | 0 | #NULL! | 3  | 3 | 0  | 0  |
| 0 | 0 | #NULL! | 2  | 1 | 0  | 1  |
| 0 | 0 | #NULL! | 3  | 3 | 0  | 0  |
| 0 | 0 | #NULL! | 1  | 1 | 0  | 3  |
| 0 | 0 | #NULL! | 1  | 1 | 0  | 2  |
| 0 | 0 | #NULL! | 2  | 1 | 0  | 0  |
| 0 | 0 | #NULL! | 1  | 1 | 0  | 0  |
| 0 | 0 | #NULL! | 4  | 3 | 99 | 99 |
| 0 | 0 | #NULL! | 3  | 2 | 0  | 3  |
| 0 | 0 | #NULL! | 2  | 1 | 0  | 0  |
| 0 | 0 | #NULL! | 3  | 1 | 0  | 1  |
| 0 | 0 | #NULL! | 3  | 3 | 0  | 1  |
| 0 | 0 | #NULL! | 3  | 3 | 1  | 5  |

|   |   |        |   |    |   |    |
|---|---|--------|---|----|---|----|
| 0 | 0 | #NULL! | 3 | 3  | 0 | 1  |
| 0 | 0 | #NULL! | 4 | 3  | 0 | 2  |
| 0 | 0 | #NULL! | 3 | 3  | 0 | 0  |
| 0 | 0 | #NULL! | 1 | 1  | 0 | 0  |
| 0 | 0 | #NULL! | 1 | 1  | 2 | 5  |
| 0 | 0 | #NULL! | 3 | 2  | 2 | 5  |
| 0 | 0 | #NULL! | 4 | 2  | 0 | 1  |
| 0 | 0 | #NULL! | 1 | 1  | 0 | 0  |
| 0 | 0 | #NULL! | 3 | 2  | 0 | 0  |
| 0 | 0 | #NULL! | 1 | 1  | 0 | 0  |
| 1 | 0 | #NULL! | 4 | 5  | 5 | 0  |
| 0 | 0 | #NULL! | 5 | 3  | 0 | 2  |
| 0 | 0 | #NULL! | 3 | 2  | 0 | 0  |
| 0 | 0 | #NULL! | 4 | 4  | 0 | 1  |
| 0 | 0 | #NULL! | 1 | 1  | 0 | 2  |
| 0 | 0 | #NULL! | 3 | 3  | 0 | 1  |
| 0 | 0 | #NULL! | 1 | 1  | 1 | 0  |
| 0 | 0 | #NULL! | 2 | 1  | 0 | 0  |
| 0 | 0 | #NULL! | 2 | 1  | 2 | 3  |
| 0 | 0 | #NULL! | 1 | 1  | 0 | 5  |
| 0 | 0 | #NULL! | 1 | 1  | 1 | 0  |
| 0 | 0 | #NULL! | 1 | 1  | 1 | 1  |
| 0 | 0 | #NULL! | 1 | 2  | 3 | 99 |
| 0 | 0 | #NULL! | 4 | 3  | 0 | 0  |
| 0 | 0 | #NULL! | 1 | 1  | 1 | 5  |
| 0 | 0 | #NULL! | 4 | 2  | 0 | 0  |
| 0 | 0 | #NULL! | 3 | 2  | 0 | 0  |
| 0 | 0 | #NULL! | 3 | 2  | 0 | 1  |
| 0 | 0 | #NULL! | 2 | 1  | 0 | 1  |
| 0 | 0 | #NULL! | 3 | 3  | 0 | 0  |
| 0 | 0 | #NULL! | 3 | 2  | 0 | 0  |
| 0 | 1 | #NULL! | 3 | 3  | 0 | 0  |
| 0 | 0 | #NULL! | 1 | 1  | 0 | 0  |
| 0 | 0 | #NULL! | 1 | 1  | 4 | 4  |
| 0 | 0 | #NULL! | 1 | 1  | 5 | 5  |
| 0 | 0 | #NULL! | 4 | 3  | 0 | 1  |
| 0 | 0 | #NULL! | 1 | 2  | 0 | 0  |
| 0 | 0 | #NULL! | 2 | 2  | 0 | 0  |
| 0 | 0 | #NULL! | 2 | 2  | 5 | 3  |
| 0 | 0 | #NULL! | 1 | 99 | 1 | 1  |
| 0 | 0 | #NULL! | 3 | 2  | 0 | 0  |
| 0 | 0 | #NULL! | 4 | 3  | 0 | 0  |
| 0 | 0 | #NULL! | 1 | 1  | 0 | 1  |
| 0 | 0 | #NULL! | 1 | 1  | 0 | 0  |
| 0 | 0 | #NULL! | 3 | 2  | 0 | 0  |
| 0 | 0 | #NULL! | 3 | 2  | 1 | 1  |
| 0 | 0 | #NULL! | 1 | 1  | 1 | 1  |
| 0 | 0 | #NULL! | 3 | 3  | 0 | 1  |

|   |   |        |    |    |   |    |
|---|---|--------|----|----|---|----|
| 0 | 0 | #NULL! | 1  | 1  | 0 | 0  |
| 0 | 0 | #NULL! | 1  | 1  | 2 | 5  |
| 0 | 0 | #NULL! | 1  | 1  | 0 | 0  |
| 0 | 1 | #NULL! | 99 | 99 | 0 | 0  |
| 1 | 0 | #NULL! | 3  | 1  | 1 | 0  |
| 0 | 0 | #NULL! | 1  | 2  | 3 | 3  |
| 0 | 0 | #NULL! | 3  | 3  | 0 | 0  |
| 0 | 0 | #NULL! | 3  | 3  | 0 | 99 |
| 0 | 0 | #NULL! | 2  | 1  | 2 | 2  |
| 0 | 0 | #NULL! | 3  | 4  | 0 | 2  |
| 0 | 0 | #NULL! | 3  | 2  | 1 | 2  |
| 0 | 0 | #NULL! | 1  | 1  | 1 | 1  |
| 0 | 0 | #NULL! | 3  | 2  | 0 | 0  |
| 0 | 0 | #NULL! | 3  | 1  | 0 | 5  |
| 0 | 0 | #NULL! | 1  | 1  | 0 | 0  |
| 0 | 0 | #NULL! | 1  | 1  | 0 | 0  |
| 0 | 0 | #NULL! | 1  | 99 | 1 | 1  |
| 0 | 0 | #NULL! | 1  | 2  | 0 | 0  |
| 0 | 0 | #NULL! | 3  | 3  | 0 | 0  |
| 0 | 0 | #NULL! | 1  | 2  | 0 | 0  |
| 0 | 0 | #NULL! | 1  | 1  | 1 | 1  |
| 0 | 0 | #NULL! | 1  | 1  | 0 | 0  |
| 0 | 0 | #NULL! | 99 | 99 | 0 | 0  |
| 0 | 0 | #NULL! | 3  | 2  | 1 | 1  |
| 0 | 0 | #NULL! | 1  | 1  | 0 | 0  |
| 1 | 0 | #NULL! | 2  | 2  | 1 | 2  |
| 0 | 0 | #NULL! | 3  | 3  | 0 | 0  |
| 0 | 0 | #NULL! | 3  | 2  | 0 | 0  |
| 0 | 0 | #NULL! | 1  | 1  | 0 | 0  |
| 0 | 0 | #NULL! | 1  | 1  | 0 | 0  |
| 0 | 0 | #NULL! | 3  | 2  | 0 | 0  |
| 0 | 0 | #NULL! | 3  | 2  | 0 | 0  |
| 0 | 0 | #NULL! | 1  | 1  | 1 | 0  |
| 0 | 0 | #NULL! | 1  | 3  | 0 | 0  |
| 0 | 0 | #NULL! | 1  | 2  | 2 | 5  |
| 0 | 0 | #NULL! | 1  | 1  | 0 | 1  |
| 0 | 0 | #NULL! | 1  | 1  | 0 | 0  |
| 0 | 0 | #NULL! | 3  | 3  | 0 | 0  |
| 0 | 0 | #NULL! | 1  | 99 | 0 | 0  |
| 0 | 0 | #NULL! | 3  | 2  | 0 | 0  |
| 1 | 0 | #NULL! | 99 | 99 | 0 | 1  |
| 0 | 0 | #NULL! | 1  | 1  | 0 | 0  |
| 0 | 0 | #NULL! | 3  | 2  | 0 | 0  |
| 0 | 0 | #NULL! | 3  | 3  | 3 | 4  |
| 0 | 0 | #NULL! | 3  | 3  | 0 | 0  |
| 0 | 0 | #NULL! | 1  | 1  | 0 | 0  |
| 0 | 1 | #NULL! | 4  | 99 | 3 | 4  |
| 0 | 0 | #NULL! | 3  | 2  | 0 | 0  |

|   |   |        |    |   |   |   |
|---|---|--------|----|---|---|---|
| 0 | 0 | #NULL! | 1  | 1 | 0 | 0 |
| 0 | 0 | #NULL! | 1  | 1 | 2 | 5 |
| 0 | 0 | #NULL! | 4  | 2 | 0 | 0 |
| 0 | 0 | #NULL! | 1  | 1 | 0 | 0 |
| 0 | 0 | #NULL! | 1  | 1 | 0 | 0 |
| 0 | 0 | #NULL! | 3  | 3 | 0 | 0 |
| 0 | 0 | #NULL! | 3  | 3 | 0 | 0 |
| 0 | 0 | #NULL! | 2  | 1 | 0 | 5 |
| 0 | 0 | #NULL! | 99 | 1 | 3 | 5 |
| 0 | 0 | #NULL! | 4  | 2 | 0 | 2 |
| 0 | 0 | #NULL! | 1  | 1 | 0 | 0 |
| 0 | 0 | #NULL! | 1  | 1 | 0 | 0 |
| 0 | 0 | #NULL! | 4  | 2 | 0 | 0 |
| 0 | 0 | #NULL! | 1  | 1 | 0 | 2 |
| 0 | 0 | #NULL! | 1  | 1 | 0 | 0 |
| 0 | 0 | #NULL! | 1  | 1 | 0 | 0 |
| 0 | 0 | #NULL! | 1  | 1 | 0 | 0 |
| 0 | 0 | #NULL! | 2  | 1 | 0 | 0 |
| 0 | 0 | #NULL! | 2  | 3 | 0 | 0 |
| 0 | 0 | #NULL! | 2  | 2 | 0 | 2 |
| 0 | 0 | #NULL! | 2  | 2 | 0 | 1 |
| 0 | 0 | #NULL! | 1  | 1 | 3 | 4 |
| 0 | 1 | #NULL! | 1  | 1 | 0 | 0 |
| 0 | 0 | #NULL! | 3  | 2 | 1 | 1 |
| 0 | 0 | #NULL! | 3  | 2 | 0 | 0 |
| 0 | 0 | #NULL! | 1  | 1 | 0 | 0 |
| 0 | 0 | #NULL! | 3  | 2 | 0 | 0 |
| 0 | 0 | #NULL! | 2  | 2 | 0 | 0 |
| 0 | 0 | #NULL! | 3  | 3 | 0 | 0 |
| 0 | 0 | #NULL! | 3  | 3 | 0 | 0 |
| 0 | 0 | #NULL! | 1  | 1 | 0 | 0 |
| 0 | 0 | #NULL! | 1  | 1 | 0 | 0 |
| 0 | 0 | #NULL! | 1  | 1 | 0 | 0 |
| 0 | 0 | #NULL! | 2  | 1 | 0 | 0 |
| 0 | 0 | #NULL! | 3  | 2 | 1 | 2 |
| 0 | 0 | #NULL! | 1  | 1 | 0 | 0 |
| 1 | 0 | #NULL! | 4  | 1 | 3 | 2 |
| 0 | 0 | #NULL! | 4  | 2 | 0 | 0 |
| 0 | 0 | #NULL! | 1  | 3 | 0 | 1 |
| 0 | 0 | #NULL! | 1  | 1 | 2 | 4 |
| 0 | 0 | #NULL! | 1  | 1 | 0 | 0 |
| 0 | 0 | #NULL! | 4  | 3 | 0 | 1 |
| 0 | 0 | #NULL! | 1  | 1 | 0 | 0 |
| 0 | 0 | #NULL! | 5  | 5 | 0 | 0 |
| 0 | 0 | #NULL! | 5  | 3 | 0 | 0 |
| 0 | 0 | #NULL! | 1  | 1 | 0 | 0 |
| 0 | 0 | #NULL! | 1  | 1 | 0 | 0 |



|   |   |        |    |    |   |   |
|---|---|--------|----|----|---|---|
| 0 | 0 | #NULL! | 3  | 1  | 0 | 0 |
| 0 | 0 | #NULL! | 4  | 3  | 0 | 0 |
| 0 | 0 | #NULL! | 3  | 3  | 1 | 2 |
| 0 | 0 | #NULL! | 3  | 1  | 1 | 1 |
| 0 | 0 | #NULL! | 1  | 1  | 0 | 1 |
| 0 | 0 | #NULL! | 1  | 1  | 0 | 0 |
| 0 | 1 | #NULL! | 1  | 1  | 5 | 5 |
| 0 | 0 | #NULL! | 5  | 2  | 0 | 0 |
| 0 | 0 | #NULL! | 1  | 1  | 0 | 1 |
| 0 | 0 | #NULL! | 2  | 2  | 0 | 0 |
| 0 | 0 | #NULL! | 2  | 1  | 0 | 0 |
| 0 | 0 | #NULL! | 1  | 1  | 0 | 0 |
| 0 | 0 | #NULL! | 4  | 3  | 0 | 1 |
| 0 | 0 | #NULL! | 3  | 3  | 0 | 0 |
| 0 | 0 | #NULL! | 4  | 2  | 0 | 0 |
| 0 | 0 | #NULL! | 3  | 3  | 0 | 1 |
| 0 | 0 | #NULL! | 1  | 1  | 0 | 0 |
| 0 | 0 | #NULL! | 2  | 1  | 0 | 1 |
| 0 | 0 | #NULL! | 1  | 1  | 2 | 2 |
| 0 | 0 | #NULL! | 1  | 1  | 0 | 0 |
| 0 | 0 | #NULL! | 1  | 1  | 0 | 0 |
| 0 | 0 | #NULL! | 3  | 2  | 0 | 0 |
| 0 | 0 | #NULL! | 1  | 1  | 0 | 0 |
| 0 | 0 | #NULL! | 1  | 1  | 0 | 0 |
| 0 | 0 | #NULL! | 1  | 1  | 0 | 0 |
| 0 | 0 | #NULL! | 1  | 2  | 0 | 0 |
| 0 | 0 | #NULL! | 1  | 1  | 0 | 0 |
| 0 | 0 | #NULL! | 5  | 2  | 0 | 3 |
| 0 | 0 | #NULL! | 3  | 1  | 0 | 0 |
| 0 | 0 | #NULL! | 3  | 2  | 0 | 0 |
| 0 | 0 | #NULL! | 3  | 2  | 0 | 0 |
| 0 | 0 | #NULL! | 3  | 1  | 0 | 0 |
| 0 | 0 | #NULL! | 2  | 1  | 0 | 0 |
| 0 | 0 | #NULL! | 3  | 2  | 0 | 0 |
| 0 | 0 | #NULL! | 3  | 3  | 0 | 2 |
| 0 | 0 | #NULL! | 1  | 1  | 0 | 0 |
| 0 | 0 | #NULL! | 99 | 99 | 0 | 0 |
| 0 | 0 | #NULL! | 3  | 2  | 0 | 1 |
| 0 | 0 | #NULL! | 4  | 3  | 0 | 0 |
| 0 | 0 | #NULL! | 3  | 2  | 0 | 0 |
| 0 | 0 | #NULL! | 1  | 1  | 0 | 0 |
| 0 | 0 | #NULL! | 3  | 3  | 0 | 0 |
| 0 | 0 | #NULL! | 5  | 3  | 0 | 0 |
| 0 | 0 | #NULL! | 1  | 1  | 0 | 0 |
| 0 | 0 | #NULL! | 1  | 1  | 0 | 0 |
| 0 | 0 | #NULL! | 2  | 1  | 0 | 0 |
| 0 | 0 | #NULL! | 4  | 2  | 0 | 0 |
| 0 | 0 | #NULL! | 1  | 1  | 1 | 0 |

|   |   |        |   |    |    |    |
|---|---|--------|---|----|----|----|
| 0 | 0 | #NULL! | 3 | 2  | 0  | 0  |
| 0 | 0 | #NULL! | 3 | 2  | 0  | 0  |
| 0 | 0 | #NULL! | 4 | 2  | 0  | 0  |
| 0 | 0 | #NULL! | 2 | 1  | 0  | 0  |
| 0 | 0 | #NULL! | 3 | 3  | 0  | 0  |
| 0 | 0 | #NULL! | 1 | 1  | 0  | 0  |
| 0 | 0 | #NULL! | 1 | 1  | 0  | 0  |
| 0 | 0 | #NULL! | 1 | 1  | 0  | 0  |
| 0 | 0 | #NULL! | 1 | 99 | 0  | 0  |
| 0 | 0 | #NULL! | 3 | 2  | 0  | 0  |
| 0 | 0 | #NULL! | 1 | 1  | 1  | 0  |
| 0 | 0 | #NULL! | 2 | 1  | 0  | 0  |
| 0 | 0 | #NULL! | 1 | 1  | 0  | 0  |
| 1 | 0 | #NULL! | 3 | 1  | 0  | 0  |
| 0 | 0 | #NULL! | 1 | 1  | 0  | 0  |
| 0 | 0 | #NULL! | 3 | 3  | 0  | 0  |
| 0 | 0 | #NULL! | 1 | 1  | 0  | 0  |
| 0 | 0 | #NULL! | 5 | 2  | 0  | 0  |
| 0 | 0 | #NULL! | 5 | 3  | 1  | 0  |
| 0 | 0 | #NULL! | 1 | 1  | 0  | 0  |
| 0 | 0 | #NULL! | 3 | 1  | 0  | 0  |
| 0 | 0 | #NULL! | 4 | 3  | 0  | 0  |
| 0 | 0 | #NULL! | 3 | 2  | 0  | 0  |
| 0 | 0 | #NULL! | 3 | 1  | 0  | 0  |
| 0 | 0 | #NULL! | 5 | 5  | 0  | 0  |
| 0 | 0 | #NULL! | 1 | 1  | 0  | 0  |
| 0 | 0 | #NULL! | 1 | 1  | 0  | 0  |
| 0 | 0 | #NULL! | 1 | 1  | 0  | 0  |
| 0 | 0 | #NULL! | 1 | 1  | 0  | 0  |
| 0 | 0 | #NULL! | 1 | 1  | 0  | 0  |
| 0 | 1 | #NULL! | 1 | 1  | 0  | 0  |
| 0 | 0 | #NULL! | 2 | 3  | 99 | 99 |
| 0 | 0 | #NULL! | 4 | 2  | 0  | 0  |
| 0 | 0 | #NULL! | 1 | 1  | 0  | 0  |
| 0 | 0 | #NULL! | 1 | 1  | 0  | 0  |
| 0 | 0 | #NULL! | 3 | 2  | 0  | 0  |
| 0 | 0 | #NULL! | 5 | 3  | 0  | 0  |
| 0 | 0 | #NULL! | 1 | 1  | 0  | 0  |
| 0 | 0 | #NULL! | 2 | 3  | 0  | 0  |
| 0 | 0 | #NULL! | 1 | 1  | 0  | 0  |
| 0 | 0 | #NULL! | 3 | 2  | 0  | 0  |
| 0 | 0 | #NULL! | 3 | 2  | 0  | 0  |
| 0 | 0 | #NULL! | 4 | 2  | 0  | 0  |
| 0 | 0 | #NULL! | 2 | 3  | 0  | 1  |
| 0 | 0 | #NULL! | 3 | 2  | 0  | 0  |
| 0 | 0 | #NULL! | 1 | 1  | 0  | 0  |
| 0 | 0 | #NULL! | 5 | 3  | 0  | 0  |
| 0 | 0 | #NULL! | 1 | 1  | 0  | 0  |

|   |   |        |    |    |   |   |
|---|---|--------|----|----|---|---|
| 0 | 0 | #NULL! | 4  | 2  | 0 | 0 |
| 0 | 0 | #NULL! | 2  | 1  | 0 | 0 |
| 0 | 0 | #NULL! | 1  | 1  | 0 | 0 |
| 0 | 0 | #NULL! | 3  | 2  | 0 | 0 |
| 0 | 0 | #NULL! | 3  | 2  | 0 | 0 |
| 0 | 0 | #NULL! | 3  | 3  | 0 | 0 |
| 0 | 0 | #NULL! | 3  | 2  | 0 | 0 |
| 0 | 0 | #NULL! | 1  | 1  | 0 | 0 |
| 0 | 0 | #NULL! | 3  | 3  | 1 | 2 |
| 0 | 0 | #NULL! | 1  | 1  | 0 | 0 |
| 1 | 0 | #NULL! | 5  | 1  | 0 | 0 |
| 0 | 0 | #NULL! | 1  | 1  | 0 | 0 |
| 0 | 0 | #NULL! | 3  | 3  | 0 | 0 |
| 0 | 0 | #NULL! | 4  | 4  | 0 | 0 |
| 0 | 0 | #NULL! | 3  | 3  | 0 | 0 |
| 0 | 0 | #NULL! | 3  | 2  | 0 | 0 |
| 0 | 0 | #NULL! | 3  | 4  | 0 | 0 |
| 0 | 0 | #NULL! | 3  | 2  | 0 | 1 |
| 0 | 0 | #NULL! | 1  | 2  | 0 | 0 |
| 0 | 0 | #NULL! | 3  | 2  | 0 | 1 |
| 0 | 0 | #NULL! | 3  | 3  | 0 | 3 |
| 0 | 0 | #NULL! | 1  | 1  | 0 | 0 |
| 0 | 0 | #NULL! | 5  | 3  | 0 | 0 |
| 0 | 0 | #NULL! | 3  | 3  | 0 | 0 |
| 0 | 0 | #NULL! | 99 | 1  | 0 | 0 |
| 0 | 0 | #NULL! | 1  | 1  | 0 | 0 |
| 0 | 0 | #NULL! | 1  | 1  | 0 | 0 |
| 0 | 0 | #NULL! | 1  | 1  | 0 | 0 |
| 0 | 0 | #NULL! | 2  | 1  | 0 | 0 |
| 0 | 0 | #NULL! | 1  | 1  | 0 | 0 |
| 0 | 0 | #NULL! | 3  | 99 | 0 | 0 |
| 0 | 0 | #NULL! | 3  | 3  | 0 | 1 |
| 0 | 0 | #NULL! | 1  | 1  | 0 | 0 |
| 0 | 0 | #NULL! | 4  | 2  | 0 | 0 |
| 0 | 0 | #NULL! | 2  | 1  | 0 | 0 |
| 1 | 0 | #NULL! | 1  | 1  | 0 | 0 |
| 0 | 0 | #NULL! | 4  | 2  | 0 | 1 |
| 0 | 0 | #NULL! | 1  | 1  | 0 | 0 |
| 0 | 0 | #NULL! | 3  | 2  | 0 | 0 |
| 0 | 0 | #NULL! | 1  | 1  | 0 | 0 |
| 0 | 0 | #NULL! | 1  | 1  | 0 | 0 |
| 0 | 0 | #NULL! | 4  | 2  | 0 | 0 |
| 0 | 0 | #NULL! | 1  | 1  | 1 | 0 |
| 0 | 0 | #NULL! | 3  | 2  | 1 | 0 |
| 0 | 0 | #NULL! | 4  | 99 | 0 | 0 |
| 0 | 0 | #NULL! | 1  | 1  | 0 | 1 |
| 0 | 0 | #NULL! | 1  | 1  | 0 | 0 |
| 0 | 0 | #NULL! | 1  | 1  | 0 | 0 |

|   |   |        |    |    |    |    |
|---|---|--------|----|----|----|----|
| 0 | 0 | #NULL! | 1  | 1  | 0  | 0  |
| 0 | 0 | #NULL! | 1  | 1  | 0  | 0  |
| 0 | 0 | #NULL! | 3  | 3  | 0  | 0  |
| 0 | 0 | #NULL! | 1  | 1  | 0  | 0  |
| 0 | 0 | #NULL! | 99 | 99 | 0  | 1  |
| 0 | 0 | #NULL! | 1  | 1  | 0  | 1  |
| 0 | 0 | #NULL! | 1  | 1  | 0  | 0  |
| 0 | 0 | #NULL! | 3  | 3  | 0  | 0  |
| 0 | 0 | #NULL! | 1  | 1  | 0  | 0  |
| 0 | 0 | #NULL! | 1  | 1  | 0  | 0  |
| 0 | 0 | #NULL! | 4  | 2  | 0  | 0  |
| 0 | 0 | #NULL! | 2  | 3  | 0  | 0  |
| 0 | 0 | #NULL! | 2  | 2  | 0  | 0  |
| 0 | 0 | #NULL! | 3  | 1  | 0  | 0  |
| 1 | 0 | #NULL! | 1  | 1  | 0  | 0  |
| 0 | 0 | #NULL! | 2  | 2  | 0  | 0  |
| 0 | 0 | #NULL! | 3  | 1  | 0  | 5  |
| 0 | 0 | #NULL! | 3  | 1  | 0  | 0  |
| 0 | 0 | #NULL! | 2  | 2  | 0  | 0  |
| 0 | 0 | #NULL! | 3  | 2  | 0  | 0  |
| 1 | 0 | #NULL! | 4  | 1  | 0  | 0  |
| 0 | 0 | #NULL! | 2  | 2  | 0  | 0  |
| 0 | 0 | #NULL! | 1  | 1  | 0  | 0  |
| 0 | 0 | #NULL! | 4  | 3  | 0  | 0  |
| 0 | 0 | #NULL! | 3  | 1  | 0  | 0  |
| 0 | 0 | #NULL! | 3  | 1  | 0  | 0  |
| 0 | 0 | #NULL! | 3  | 3  | 0  | 0  |
| 0 | 0 | #NULL! | 2  | 1  | 0  | 0  |
| 0 | 0 | #NULL! | 1  | 1  | 0  | 0  |
| 0 | 0 | #NULL! | 1  | 3  | 0  | 0  |
| 0 | 0 | #NULL! | 3  | 3  | 0  | 0  |
| 0 | 0 | #NULL! | 2  | 2  | 0  | 0  |
| 0 | 0 | #NULL! | 2  | 1  | 0  | 99 |
| 0 | 0 | #NULL! | 1  | 1  | 0  | 1  |
| 0 | 0 | #NULL! | 3  | 1  | 0  | 0  |
| 0 | 0 | #NULL! | 3  | 3  | 99 | 0  |
| 0 | 0 | #NULL! | 2  | 2  | 0  | 0  |
| 0 | 0 | #NULL! | 3  | 2  | 0  | 0  |
| 0 | 0 | #NULL! | 1  | 1  | 0  | 0  |
| 0 | 0 | #NULL! | 2  | 2  | 0  | 0  |
| 0 | 0 | #NULL! | 1  | 1  | 0  | 0  |
| 0 | 0 | #NULL! | 3  | 2  | 0  | 0  |
| 0 | 0 | #NULL! | 3  | 1  | 0  | 0  |
| 0 | 0 | #NULL! | 4  | 4  | 0  | 0  |
| 0 | 0 | #NULL! | 1  | 1  | 0  | 0  |
| 0 | 0 | #NULL! | 1  | 1  | 0  | 0  |
| 0 | 0 | #NULL! | 5  | 4  | 0  | 1  |
| 0 | 1 | #NULL! | 99 | 99 | 0  | 1  |

|   |   |        |   |   |   |    |
|---|---|--------|---|---|---|----|
| 0 | 0 | #NULL! | 5 | 3 | 1 | 5  |
| 0 | 0 | #NULL! | 3 | 3 | 0 | 0  |
| 0 | 0 | #NULL! | 2 | 2 | 0 | 0  |
| 0 | 0 | #NULL! | 2 | 1 | 2 | 99 |
| 0 | 0 | #NULL! | 4 | 3 | 0 | 0  |
| 0 | 0 | #NULL! | 1 | 1 | 0 | 0  |
| 0 | 0 | #NULL! | 3 | 3 | 0 | 0  |
| 0 | 0 | #NULL! | 2 | 2 | 0 | 0  |
| 0 | 0 | #NULL! | 2 | 2 | 0 | 0  |
| 0 | 0 | #NULL! | 1 | 1 | 1 | 1  |
| 0 | 0 | #NULL! | 1 | 1 | 0 | 0  |
| 0 | 0 | #NULL! | 1 | 1 | 0 | 0  |
| 0 | 0 | #NULL! | 3 | 2 | 0 | 0  |
| 0 | 0 | #NULL! | 1 | 3 | 1 | 1  |
| 0 | 0 | #NULL! | 3 | 2 | 0 | 0  |
| 0 | 0 | #NULL! | 1 | 1 | 1 | 2  |
| 0 | 0 | #NULL! | 1 | 1 | 0 | 0  |
| 0 | 0 | #NULL! | 1 | 1 | 0 | 1  |
| 0 | 0 | #NULL! | 2 | 2 | 0 | 99 |
| 0 | 0 | #NULL! | 4 | 3 | 1 | 1  |
| 0 | 0 | #NULL! | 3 | 2 | 0 | 0  |
| 0 | 0 | #NULL! | 3 | 3 | 0 | 0  |
| 0 | 0 | #NULL! | 4 | 2 | 0 | 0  |
| 0 | 0 | #NULL! | 1 | 1 | 0 | 0  |
| 0 | 0 | #NULL! | 3 | 2 | 0 | 0  |
| 0 | 0 | #NULL! | 1 | 1 | 0 | 0  |
| 0 | 0 | #NULL! | 1 | 1 | 5 | 2  |
| 0 | 0 | #NULL! | 3 | 2 | 0 | 0  |
| 0 | 0 | #NULL! | 3 | 2 | 1 | 3  |
| 0 | 0 | #NULL! | 2 | 1 | 1 | 1  |
| 0 | 0 | #NULL! | 2 | 2 | 1 | 1  |
| 0 | 0 | #NULL! | 3 | 3 | 0 | 0  |
| 0 | 0 | #NULL! | 1 | 1 | 0 | 0  |
| 0 | 0 | #NULL! | 1 | 1 | 0 | 0  |
| 0 | 0 | #NULL! | 3 | 3 | 0 | 0  |
| 0 | 0 | #NULL! | 1 | 1 | 0 | 2  |
| 0 | 0 | #NULL! | 2 | 2 | 0 | 0  |
| 0 | 0 | #NULL! | 4 | 2 | 0 | 1  |
| 0 | 0 | #NULL! | 2 | 1 | 0 | 0  |
| 0 | 0 | #NULL! | 1 | 1 | 0 | 0  |
| 0 | 0 | #NULL! | 2 | 2 | 1 | 1  |
| 0 | 0 | #NULL! | 2 | 2 | 0 | 0  |
| 0 | 0 | #NULL! | 1 | 1 | 0 | 0  |
| 0 | 0 | #NULL! | 3 | 3 | 0 | 3  |
| 0 | 0 | #NULL! | 2 | 3 | 0 | 0  |
| 0 | 0 | #NULL! | 3 | 3 | 0 | 0  |
| 0 | 0 | #NULL! | 2 | 1 | 0 | 1  |
| 0 | 0 | #NULL! | 1 | 1 | 0 | 0  |

|   |   |        |   |   |   |    |
|---|---|--------|---|---|---|----|
| 0 | 0 | #NULL! | 3 | 3 | 0 | 0  |
| 0 | 0 | #NULL! | 4 | 3 | 0 | 0  |
| 0 | 0 | #NULL! | 1 | 1 | 0 | 0  |
| 0 | 0 | #NULL! | 3 | 2 | 0 | 0  |
| 0 | 0 | #NULL! | 4 | 2 | 0 | 0  |
| 0 | 0 | #NULL! | 1 | 1 | 0 | 0  |
| 0 | 0 | #NULL! | 1 | 2 | 0 | 0  |
| 0 | 0 | #NULL! | 3 | 2 | 0 | 0  |
| 0 | 0 | #NULL! | 1 | 1 | 0 | 1  |
| 0 | 0 | #NULL! | 2 | 3 | 0 | 0  |
| 0 | 0 | #NULL! | 2 | 2 | 0 | 1  |
| 0 | 0 | #NULL! | 3 | 4 | 0 | 0  |
| 0 | 0 | #NULL! | 4 | 3 | 0 | 0  |
| 0 | 0 | #NULL! | 1 | 1 | 0 | 0  |
| 0 | 0 | #NULL! | 4 | 3 | 1 | 4  |
| 0 | 0 | #NULL! | 1 | 1 | 0 | 0  |
| 0 | 0 | #NULL! | 1 | 1 | 0 | 0  |
| 0 | 0 | #NULL! | 1 | 1 | 0 | 0  |
| 0 | 0 | #NULL! | 1 | 1 | 0 | 0  |
| 0 | 0 | #NULL! | 1 | 1 | 0 | 0  |
| 0 | 0 | #NULL! | 1 | 1 | 0 | 99 |
| 0 | 0 | #NULL! | 1 | 1 | 0 | 0  |
| 0 | 0 | #NULL! | 1 | 1 | 0 | 0  |
| 0 | 0 | #NULL! | 1 | 3 | 0 | 1  |
| 0 | 0 | #NULL! | 1 | 2 | 0 | 0  |
| 0 | 0 | #NULL! | 1 | 1 | 0 | 0  |
| 0 | 0 | #NULL! | 1 | 1 | 0 | 0  |
| 0 | 0 | #NULL! | 3 | 3 | 2 | 3  |
| 0 | 0 | #NULL! | 4 | 2 | 0 | 0  |
| 0 | 0 | #NULL! | 1 | 1 | 0 | 0  |
| 0 | 0 | #NULL! | 1 | 1 | 0 | 0  |
| 0 | 0 | #NULL! | 2 | 2 | 0 | 0  |
| 0 | 0 | #NULL! | 1 | 2 | 0 | 0  |
| 0 | 0 | #NULL! | 2 | 1 | 0 | 0  |
| 0 | 0 | #NULL! | 1 | 1 | 0 | 0  |
| 0 | 0 | #NULL! | 3 | 3 | 0 | 1  |
| 0 | 0 | #NULL! | 4 | 3 | 0 | 0  |
| 0 | 0 | #NULL! | 1 | 1 | 0 | 0  |
| 0 | 0 | #NULL! | 3 | 1 | 0 | 0  |
| 0 | 0 | #NULL! | 5 | 3 | 0 | 0  |
| 0 | 0 | #NULL! | 1 | 1 | 0 | 0  |
| 0 | 0 | #NULL! | 1 | 2 | 0 | 0  |
| 0 | 0 | #NULL! | 3 | 3 | 0 | 0  |
| 0 | 0 | #NULL! | 2 | 2 | 0 | 0  |
| 0 | 0 | #NULL! | 3 | 1 | 0 | 0  |
| 0 | 0 | #NULL! | 3 | 3 | 0 | 0  |
| 0 | 0 | #NULL! | 4 | 2 | 0 | 0  |
| 0 | 0 | #NULL! | 3 | 3 | 0 | 0  |

|   |   |        |   |    |   |   |
|---|---|--------|---|----|---|---|
| 0 | 0 | #NULL! | 3 | 2  | 0 | 0 |
| 0 | 0 | #NULL! | 4 | 3  | 0 | 1 |
| 0 | 0 | #NULL! | 3 | 1  | 1 | 1 |
| 0 | 0 | #NULL! | 1 | 1  | 0 | 0 |
| 0 | 0 | #NULL! | 3 | 3  | 0 | 0 |
| 0 | 0 | #NULL! | 3 | 1  | 0 | 0 |
| 0 | 0 | #NULL! | 1 | 1  | 0 | 0 |
| 0 | 0 | #NULL! | 1 | 1  | 0 | 0 |
| 0 | 0 | #NULL! | 4 | 3  | 0 | 0 |
| 0 | 0 | #NULL! | 4 | 2  | 0 | 1 |
| 0 | 0 | #NULL! | 1 | 1  | 0 | 0 |
| 0 | 0 | #NULL! | 1 | 1  | 0 | 0 |
| 0 | 0 | #NULL! | 2 | 2  | 0 | 1 |
| 0 | 0 | #NULL! | 1 | 1  | 0 | 0 |
| 0 | 0 | #NULL! | 2 | 2  | 1 | 0 |
| 0 | 0 | #NULL! | 1 | 1  | 0 | 0 |
| 0 | 0 | #NULL! | 2 | 1  | 0 | 0 |
| 0 | 0 | #NULL! | 2 | 1  | 0 | 0 |
| 0 | 0 | #NULL! | 1 | 1  | 0 | 0 |
| 0 | 0 | #NULL! | 1 | 1  | 0 | 0 |
| 0 | 0 | #NULL! | 1 | 1  | 0 | 1 |
| 0 | 0 | #NULL! | 1 | 1  | 0 | 0 |
| 0 | 0 | #NULL! | 1 | 1  | 5 | 0 |
| 0 | 0 | #NULL! | 3 | 2  | 0 | 0 |
| 0 | 0 | #NULL! | 2 | 1  | 0 | 0 |
| 0 | 0 | #NULL! | 3 | 1  | 0 | 1 |
| 1 | 0 | #NULL! | 2 | 2  | 0 | 0 |
| 0 | 0 | #NULL! | 1 | 1  | 0 | 0 |
| 0 | 0 | #NULL! | 1 | 2  | 0 | 0 |
| 0 | 0 | #NULL! | 3 | 2  | 0 | 0 |
| 0 | 0 | #NULL! | 3 | 2  | 0 | 0 |
| 0 | 0 | #NULL! | 2 | 2  | 1 | 0 |
| 0 | 0 | #NULL! | 1 | 1  | 0 | 0 |
| 0 | 0 | #NULL! | 3 | 3  | 0 | 1 |
| 1 | 0 | #NULL! | 3 | 3  | 0 | 0 |
| 0 | 0 | #NULL! | 1 | 1  | 0 | 0 |
| 0 | 0 | #NULL! | 5 | 3  | 0 | 0 |
| 0 | 0 | #NULL! | 2 | 1  | 1 | 2 |
| 0 | 0 | #NULL! | 1 | 1  | 0 | 1 |
| 0 | 1 | #NULL! | 2 | 1  | 0 | 0 |
| 0 | 0 | #NULL! | 1 | 1  | 0 | 0 |
| 0 | 0 | #NULL! | 3 | 3  | 0 | 0 |
| 0 | 0 | #NULL! | 2 | 1  | 5 | 5 |
| 0 | 0 | #NULL! | 4 | 3  | 0 | 0 |
| 0 | 0 | #NULL! | 2 | 1  | 1 | 2 |
| 0 | 0 | #NULL! | 4 | 2  | 3 | 2 |
| 0 | 0 | #NULL! | 2 | 2  | 0 | 0 |
| 0 | 0 | #NULL! | 1 | 99 | 0 | 1 |

|   |   |        |   |    |    |    |
|---|---|--------|---|----|----|----|
| 0 | 0 | #NULL! | 3 | 2  | 0  | 0  |
| 0 | 0 | #NULL! | 3 | 1  | 0  | 0  |
| 0 | 0 | #NULL! | 2 | 3  | 0  | 0  |
| 0 | 0 | #NULL! | 3 | 3  | 0  | 1  |
| 0 | 0 | #NULL! | 1 | 1  | 0  | 1  |
| 0 | 0 | #NULL! | 3 | 1  | 0  | 3  |
| 0 | 0 | #NULL! | 1 | 1  | 0  | 0  |
| 0 | 0 | #NULL! | 2 | 1  | 0  | 0  |
| 0 | 0 | #NULL! | 4 | 1  | 0  | 0  |
| 0 | 0 | #NULL! | 1 | 1  | 0  | 0  |
| 0 | 0 | #NULL! | 1 | 2  | 0  | 0  |
| 0 | 0 | #NULL! | 1 | 1  | 0  | 0  |
| 0 | 0 | #NULL! | 4 | 3  | 0  | 3  |
| 0 | 0 | #NULL! | 1 | 1  | 0  | 0  |
| 0 | 0 | #NULL! | 5 | 99 | 2  | 2  |
| 0 | 0 | #NULL! | 3 | 3  | 0  | 0  |
| 0 | 0 | #NULL! | 1 | 1  | 0  | 0  |
| 0 | 0 | #NULL! | 1 | 1  | 0  | 0  |
| 0 | 0 | #NULL! | 3 | 3  | 0  | 0  |
| 0 | 0 | #NULL! | 4 | 3  | 0  | 0  |
| 0 | 0 | #NULL! | 1 | 1  | 0  | 1  |
| 0 | 0 | #NULL! | 2 | 2  | 0  | 0  |
| 0 | 0 | #NULL! | 3 | 3  | 1  | 1  |
| 0 | 0 | #NULL! | 1 | 1  | 0  | 0  |
| 0 | 0 | #NULL! | 1 | 1  | 1  | 2  |
| 0 | 0 | #NULL! | 2 | 2  | 0  | 1  |
| 0 | 0 | #NULL! | 3 | 3  | 99 | 1  |
| 0 | 0 | #NULL! | 1 | 1  | 0  | 0  |
| 0 | 0 | #NULL! | 2 | 2  | 0  | 0  |
| 0 | 0 | #NULL! | 3 | 3  | 0  | 0  |
| 0 | 0 | #NULL! | 4 | 1  | 0  | 0  |
| 0 | 0 | #NULL! | 3 | 1  | 0  | 99 |
| 0 | 0 | #NULL! | 3 | 1  | 0  | 0  |
| 0 | 0 | #NULL! | 1 | 1  | 1  | 1  |
| 0 | 0 | #NULL! | 1 | 1  | 0  | 0  |
| 0 | 0 | #NULL! | 3 | 2  | 0  | 0  |
| 0 | 0 | #NULL! | 2 | 1  | 0  | 0  |
| 0 | 0 | #NULL! | 5 | 4  | 0  | 0  |
| 0 | 0 | #NULL! | 1 | 1  | 0  | 0  |
| 0 | 0 | #NULL! | 3 | 2  | 0  | 0  |
| 0 | 0 | #NULL! | 3 | 3  | 0  | 1  |
| 0 | 0 | #NULL! | 3 | 3  | 0  | 0  |
| 0 | 0 | #NULL! | 3 | 3  | 0  | 0  |
| 0 | 0 | #NULL! | 2 | 3  | 0  | 0  |
| 0 | 0 | #NULL! | 3 | 1  | 0  | 0  |
| 0 | 0 | #NULL! | 3 | 3  | 0  | 0  |
| 0 | 0 | #NULL! | 1 | 1  | 0  | 0  |
| 0 | 0 | #NULL! | 3 | 2  | 0  | 0  |



|   |   |        |    |    |    |    |
|---|---|--------|----|----|----|----|
| 0 | 0 | #NULL! | 3  | 1  | 0  | 0  |
| 0 | 0 | #NULL! | 1  | 2  | 0  | 0  |
| 0 | 0 | #NULL! | 1  | 1  | 0  | 0  |
| 0 | 0 | #NULL! | 1  | 1  | 0  | 0  |
| 0 | 0 | #NULL! | 1  | 1  | 0  | 0  |
| 0 | 0 | #NULL! | 4  | 2  | 0  | 0  |
| 0 | 0 | #NULL! | 5  | 2  | 0  | 0  |
| 0 | 0 | #NULL! | 1  | 3  | 0  | 0  |
| 0 | 0 | #NULL! | 3  | 2  | 0  | 0  |
| 0 | 0 | #NULL! | 1  | 1  | 0  | 0  |
| 0 | 0 | #NULL! | 1  | 1  | 0  | 1  |
| 0 | 1 | #NULL! | 99 | 99 | 0  | 1  |
| 0 | 0 | #NULL! | 3  | 3  | 0  | 0  |
| 0 | 0 | #NULL! | 1  | 1  | 0  | 0  |
| 0 | 0 | #NULL! | 4  | 2  | 0  | 0  |
| 0 | 0 | #NULL! | 1  | 1  | 0  | 2  |
| 0 | 0 | #NULL! | 1  | 2  | 0  | 0  |
| 0 | 0 | #NULL! | 2  | 2  | 0  | 0  |
| 0 | 0 | #NULL! | 3  | 3  | 0  | 0  |
| 0 | 0 | #NULL! | 1  | 1  | 0  | 0  |
| 0 | 0 | #NULL! | 3  | 2  | 0  | 0  |
| 0 | 0 | #NULL! | 3  | 1  | 0  | 0  |
| 0 | 0 | #NULL! | 3  | 2  | 0  | 0  |
| 0 | 0 | #NULL! | 1  | 1  | 0  | 0  |
| 0 | 0 | #NULL! | 3  | 2  | 0  | 0  |
| 0 | 0 | #NULL! | 1  | 2  | 0  | 0  |
| 0 | 0 | #NULL! | 1  | 1  | 0  | 0  |
| 0 | 0 | #NULL! | 4  | 2  | 0  | 0  |
| 0 | 0 | #NULL! | 3  | 1  | 0  | 0  |
| 0 | 0 | #NULL! | 1  | 1  | 0  | 0  |
| 0 | 0 | #NULL! | 5  | 1  | 0  | 0  |
| 0 | 1 | #NULL! | 99 | 99 | 99 | 99 |
| 0 | 0 | #NULL! | 1  | 1  | 0  | 0  |
| 0 | 0 | #NULL! | 1  | 1  | 0  | 0  |
| 0 | 0 | #NULL! | 1  | 1  | 0  | 0  |
| 0 | 0 | #NULL! | 2  | 2  | 3  | 2  |
| 0 | 0 | #NULL! | 5  | 2  | 0  | 0  |
| 0 | 0 | #NULL! | 1  | 1  | 0  | 0  |
| 0 | 0 | #NULL! | 3  | 3  | 0  | 0  |
| 0 | 0 | #NULL! | 4  | 3  | 0  | 0  |
| 0 | 0 | #NULL! | 2  | 2  | 0  | 0  |
| 1 | 0 | #NULL! | 4  | 1  | 0  | 0  |
| 0 | 0 | #NULL! | 1  | 1  | 0  | 0  |
| 0 | 0 | #NULL! | 1  | 1  | 0  | 0  |
| 0 | 0 | #NULL! | 1  | 1  | 0  | 0  |
| 0 | 0 | #NULL! | 1  | 1  | 0  | 0  |
| 0 | 0 | #NULL! | 1  | 1  | 0  | 0  |
| 0 | 0 | #NULL! | 3  | 2  | 0  | 0  |

|   |   |        |   |    |    |    |
|---|---|--------|---|----|----|----|
| 0 | 0 | #NULL! | 4 | 3  | 0  | 0  |
| 0 | 0 | #NULL! | 1 | 1  | 0  | 0  |
| 0 | 0 | #NULL! | 2 | 2  | 0  | 0  |
| 0 | 0 | #NULL! | 2 | 3  | 1  | 2  |
| 0 | 0 | #NULL! | 2 | 2  | 0  | 0  |
| 0 | 0 | #NULL! | 2 | 3  | 0  | 2  |
| 0 | 0 | #NULL! | 1 | 1  | 0  | 0  |
| 0 | 0 | #NULL! | 1 | 1  | 0  | 0  |
| 0 | 0 | #NULL! | 1 | 1  | 1  | 1  |
| 0 | 0 | #NULL! | 3 | 3  | 0  | 2  |
| 1 | 0 | #NULL! | 2 | 1  | 1  | 3  |
| 0 | 0 | #NULL! | 4 | 2  | 0  | 0  |
| 0 | 0 | #NULL! | 1 | 1  | 0  | 1  |
| 0 | 0 | #NULL! | 3 | 2  | 99 | 99 |
| 0 | 0 | #NULL! | 1 | 1  | 0  | 1  |
| 0 | 0 | #NULL! | 1 | 99 | 1  | 1  |
| 0 | 0 | #NULL! | 3 | 2  | 3  | 3  |
| 0 | 0 | #NULL! | 2 | 1  | 2  | 2  |
| 0 | 0 | #NULL! | 1 | 1  | 0  | 1  |
| 0 | 0 | #NULL! | 1 | 1  | 1  | 2  |
| 0 | 0 | #NULL! | 3 | 3  | 0  | 0  |
| 0 | 0 | #NULL! | 1 | 1  | 0  | 0  |
| 0 | 0 | #NULL! | 3 | 3  | 0  | 99 |
| 0 | 0 | #NULL! | 3 | 2  | 0  | 0  |
| 0 | 0 | #NULL! | 2 | 3  | 0  | 0  |
| 0 | 0 | #NULL! | 3 | 2  | 0  | 0  |
| 0 | 0 | #NULL! | 3 | 3  | 0  | 0  |
| 0 | 0 | #NULL! | 1 | 1  | 0  | 0  |
| 0 | 0 | #NULL! | 1 | 1  | 0  | 0  |
| 0 | 0 | #NULL! | 1 | 1  | 0  | 0  |
| 0 | 0 | #NULL! | 1 | 1  | 0  | 1  |
| 0 | 0 | #NULL! | 2 | 2  | 0  | 0  |
| 0 | 0 | #NULL! | 3 | 2  | 0  | 0  |
| 0 | 0 | #NULL! | 3 | 2  | 0  | 0  |
| 0 | 0 | #NULL! | 1 | 1  | 1  | 0  |
| 0 | 0 | #NULL! | 2 | 1  | 0  | 0  |
| 0 | 0 | #NULL! | 1 | 1  | 0  | 0  |
| 0 | 0 | #NULL! | 1 | 1  | 0  | 0  |
| 0 | 0 | #NULL! | 1 | 1  | 0  | 0  |
| 0 | 0 | #NULL! | 3 | 3  | 0  | 1  |
| 0 | 0 | #NULL! | 2 | 2  | 0  | 0  |
| 0 | 0 | #NULL! | 5 | 2  | 0  | 0  |
| 0 | 0 | #NULL! | 2 | 1  | 0  | 0  |
| 0 | 0 | #NULL! | 3 | 3  | 0  | 0  |
| 1 | 0 | #NULL! | 3 | 3  | 0  | 0  |
| 0 | 0 | #NULL! | 3 | 1  | 0  | 0  |
| 0 | 0 | #NULL! | 3 | 2  | 0  | 0  |
| 0 | 0 | #NULL! | 1 | 1  | 0  | 0  |

|   |   |        |    |    |    |    |
|---|---|--------|----|----|----|----|
| 1 | 0 | #NULL! | 3  | 4  | 0  | 0  |
| 0 | 0 | #NULL! | 3  | 3  | 0  | 1  |
| 0 | 0 | #NULL! | 2  | 3  | 1  | 0  |
| 0 | 0 | #NULL! | 1  | 1  | 0  | 0  |
| 0 | 0 | #NULL! | 4  | 4  | 0  | 0  |
| 0 | 0 | #NULL! | 3  | 3  | 0  | 0  |
| 0 | 0 | #NULL! | 4  | 3  | 0  | 0  |
| 0 | 0 | #NULL! | 1  | 1  | 0  | 0  |
| 0 | 0 | #NULL! | 3  | 2  | 0  | 0  |
| 0 | 0 | #NULL! | 4  | 3  | 0  | 0  |
| 0 | 0 | #NULL! | 3  | 2  | 1  | 0  |
| 0 | 0 | #NULL! | 1  | 1  | 0  | 0  |
| 0 | 0 | #NULL! | 1  | 1  | 0  | 0  |
| 0 | 0 | #NULL! | 3  | 1  | 0  | 0  |
| 0 | 0 | #NULL! | 1  | 1  | 99 | 99 |
| 0 | 0 | #NULL! | 3  | 3  | 0  | 0  |
| 0 | 0 | #NULL! | 3  | 3  | 1  | 5  |
| 0 | 0 | #NULL! | 3  | 4  | 0  | 0  |
| 0 | 0 | #NULL! | 4  | 4  | 0  | 0  |
| 0 | 1 | #NULL! | 99 | 99 | 99 | 99 |
| 0 | 0 | #NULL! | 2  | 3  | 0  | 2  |
| 0 | 0 | #NULL! | 1  | 1  | 0  | 3  |
| 0 | 0 | #NULL! | 1  | 1  | 1  | 1  |
| 0 | 0 | #NULL! | 1  | 1  | 1  | 2  |
| 0 | 0 | #NULL! | 1  | 1  | 0  | 0  |
| 0 | 0 | #NULL! | 1  | 1  | 0  | 0  |
| 0 | 0 | #NULL! | 2  | 2  | 0  | 2  |
| 0 | 0 | #NULL! | 1  | 1  | 0  | 0  |
| 0 | 0 | #NULL! | 4  | 3  | 0  | 0  |
| 0 | 0 | #NULL! | 1  | 1  | 0  | 0  |
| 0 | 0 | #NULL! | 3  | 3  | 0  | 0  |
| 0 | 0 | #NULL! | 4  | 2  | 0  | 0  |
| 0 | 0 | #NULL! | 1  | 1  | 0  | 0  |
| 0 | 0 | #NULL! | 1  | 2  | 0  | 0  |
| 0 | 0 | #NULL! | 4  | 3  | 0  | 1  |
| 0 | 0 | #NULL! | 1  | 1  | 1  | 2  |
| 0 | 0 | #NULL! | 1  | 1  | 3  | 1  |
| 0 | 0 | #NULL! | 3  | 2  | 0  | 1  |
| 0 | 0 | #NULL! | 4  | 2  | 0  | 0  |
| 0 | 0 | #NULL! | 1  | 1  | 0  | 0  |
| 0 | 0 | #NULL! | 3  | 3  | 0  | 0  |
| 0 | 0 | #NULL! | 99 | 2  | 0  | 1  |
| 0 | 0 | #NULL! | 4  | 3  | 0  | 0  |
| 0 | 0 | #NULL! | 3  | 1  | 0  | 0  |
| 0 | 0 | #NULL! | 3  | 5  | 0  | 0  |
| 0 | 0 | #NULL! | 1  | 1  | 0  | 0  |
| 0 | 0 | #NULL! | 1  | 1  | 0  | 0  |
| 0 | 0 | #NULL! | 2  | 4  | 1  | 1  |

|   |   |        |   |    |   |   |
|---|---|--------|---|----|---|---|
| 0 | 0 | #NULL! | 5 | 3  | 0 | 0 |
| 0 | 0 | #NULL! | 3 | 1  | 0 | 0 |
| 0 | 0 | #NULL! | 3 | 2  | 0 | 0 |
| 0 | 0 | #NULL! | 1 | 1  | 0 | 0 |
| 0 | 0 | #NULL! | 4 | 2  | 0 | 0 |
| 1 | 0 | #NULL! | 3 | 2  | 0 | 0 |
| 0 | 0 | #NULL! | 2 | 99 | 0 | 0 |
| 0 | 0 | #NULL! | 3 | 2  | 0 | 0 |
| 0 | 0 | #NULL! | 1 | 1  | 0 | 0 |
| 0 | 0 | #NULL! | 1 | 1  | 2 | 3 |
| 0 | 0 | #NULL! | 1 | 1  | 5 | 5 |
| 0 | 0 | #NULL! | 5 | 3  | 0 | 0 |
| 0 | 0 | #NULL! | 1 | 2  | 2 | 0 |
| 0 | 0 | #NULL! | 3 | 3  | 0 | 0 |
| 0 | 0 | #NULL! | 5 | 3  | 0 | 3 |
| 0 | 0 | #NULL! | 1 | 1  | 0 | 1 |
| 0 | 0 | #NULL! | 1 | 1  | 0 | 0 |
| 0 | 0 | #NULL! | 3 | 3  | 0 | 0 |
| 0 | 0 | #NULL! | 3 | 2  | 0 | 1 |
| 0 | 0 | #NULL! | 3 | 3  | 0 | 0 |
| 0 | 0 | #NULL! | 1 | 1  | 0 | 0 |
| 0 | 0 | #NULL! | 3 | 2  | 0 | 0 |
| 0 | 0 | #NULL! | 1 | 1  | 0 | 0 |
| 0 | 0 | #NULL! | 3 | 3  | 0 | 0 |
| 0 | 0 | #NULL! | 3 | 3  | 0 | 0 |
| 0 | 0 | #NULL! | 1 | 1  | 0 | 0 |
| 0 | 0 | #NULL! | 3 | 3  | 0 | 0 |
| 0 | 0 | #NULL! | 3 | 3  | 0 | 0 |
| 0 | 0 | #NULL! | 4 | 2  | 0 | 0 |
| 0 | 0 | #NULL! | 2 | 2  | 1 | 1 |
| 0 | 0 | #NULL! | 3 | 2  | 1 | 2 |
| 0 | 0 | #NULL! | 1 | 1  | 0 | 0 |
| 0 | 0 | #NULL! | 1 | 1  | 1 | 0 |
| 0 | 0 | #NULL! | 1 | 1  | 0 | 0 |
| 0 | 0 | #NULL! | 1 | 1  | 0 | 0 |
| 0 | 0 | #NULL! | 1 | 2  | 4 | 3 |
| 0 | 0 | #NULL! | 3 | 2  | 0 | 0 |
| 0 | 0 | #NULL! | 1 | 1  | 0 | 0 |
| 0 | 0 | #NULL! | 3 | 3  | 1 | 2 |
| 0 | 0 | #NULL! | 1 | 2  | 5 | 5 |
| 0 | 0 | #NULL! | 1 | 1  | 0 | 0 |
| 0 | 0 | #NULL! | 5 | 1  | 5 | 5 |
| 0 | 0 | #NULL! | 1 | 1  | 0 | 0 |
| 0 | 0 | #NULL! | 1 | 1  | 0 | 0 |
| 0 | 0 | #NULL! | 1 | 1  | 0 | 0 |
| 0 | 0 | #NULL! | 3 | 3  | 0 | 0 |
| 0 | 0 | #NULL! | 3 | 3  | 0 | 0 |
| 0 | 0 | #NULL! | 1 | 1  | 0 | 0 |

|   |   |        |    |    |   |   |
|---|---|--------|----|----|---|---|
| 0 | 0 | #NULL! | 1  | 1  | 2 | 2 |
| 0 | 0 | #NULL! | 4  | 3  | 0 | 0 |
| 1 | 0 | #NULL! | 3  | 1  | 0 | 0 |
| 0 | 0 | #NULL! | 1  | 1  | 0 | 0 |
| 0 | 0 | #NULL! | 4  | 2  | 0 | 0 |
| 0 | 0 | #NULL! | 3  | 3  | 0 | 0 |
| 0 | 0 | #NULL! | 3  | 3  | 0 | 0 |
| 0 | 0 | #NULL! | 1  | 1  | 0 | 0 |
| 0 | 0 | #NULL! | 1  | 1  | 0 | 1 |
| 0 | 0 | #NULL! | 3  | 2  | 0 | 3 |
| 0 | 0 | #NULL! | 1  | 1  | 0 | 0 |
| 0 | 0 | #NULL! | 2  | 2  | 0 | 0 |
| 0 | 0 | #NULL! | 1  | 1  | 0 | 0 |
| 0 | 0 | #NULL! | 2  | 1  | 0 | 0 |
| 0 | 0 | #NULL! | 2  | 1  | 0 | 0 |
| 0 | 0 | #NULL! | 3  | 3  | 0 | 0 |
| 0 | 0 | #NULL! | 3  | 3  | 0 | 0 |
| 0 | 0 | #NULL! | 3  | 1  | 0 | 0 |
| 0 | 0 | #NULL! | 1  | 1  | 0 | 0 |
| 0 | 0 | #NULL! | 4  | 2  | 0 | 1 |
| 0 | 0 | #NULL! | 1  | 1  | 0 | 0 |
| 0 | 0 | #NULL! | 3  | 3  | 0 | 0 |
| 0 | 0 | #NULL! | 1  | 1  | 0 | 0 |
| 0 | 0 | #NULL! | 99 | 99 | 0 | 0 |
| 0 | 0 | #NULL! | 1  | 1  | 0 | 0 |
| 0 | 0 | #NULL! | 1  | 3  | 0 | 0 |
| 0 | 0 | #NULL! | 2  | 1  | 0 | 0 |
| 0 | 0 | #NULL! | 3  | 3  | 0 | 0 |
| 0 | 0 | #NULL! | 1  | 1  | 0 | 0 |
| 0 | 0 | #NULL! | 1  | 1  | 0 | 0 |
| 0 | 0 | #NULL! | 1  | 1  | 0 | 1 |
| 0 | 0 | #NULL! | 3  | 3  | 1 | 1 |
| 0 | 0 | #NULL! | 1  | 2  | 0 | 0 |
| 0 | 0 | #NULL! | 3  | 2  | 0 | 1 |
| 0 | 0 | #NULL! | 1  | 1  | 3 | 4 |
| 0 | 0 | #NULL! | 3  | 3  | 1 | 0 |
| 0 | 0 | #NULL! | 3  | 1  | 0 | 0 |
| 0 | 0 | #NULL! | 4  | 3  | 0 | 0 |
| 0 | 0 | #NULL! | 3  | 2  | 1 | 2 |
| 0 | 0 | #NULL! | 3  | 2  | 0 | 0 |
| 0 | 0 | #NULL! | 1  | 1  | 0 | 0 |
| 0 | 0 | #NULL! | 3  | 3  | 0 | 1 |
| 0 | 0 | #NULL! | 4  | 3  | 0 | 0 |
| 0 | 0 | #NULL! | 1  | 1  | 0 | 0 |
| 0 | 0 | #NULL! | 1  | 1  | 0 | 0 |
| 0 | 0 | #NULL! | 2  | 1  | 1 | 2 |
| 0 | 0 | #NULL! | 1  | 1  | 0 | 0 |
| 0 | 0 | #NULL! | 3  | 1  | 0 | 0 |

|   |   |        |   |   |   |    |
|---|---|--------|---|---|---|----|
| 0 | 0 | #NULL! | 4 | 2 | 1 | 2  |
| 0 | 0 | #NULL! | 1 | 1 | 0 | 0  |
| 0 | 0 | #NULL! | 2 | 3 | 4 | 4  |
| 0 | 0 | #NULL! | 1 | 1 | 0 | 0  |
| 0 | 0 | #NULL! | 1 | 2 | 0 | 1  |
| 0 | 0 | #NULL! | 2 | 1 | 0 | 0  |
| 0 | 0 | #NULL! | 3 | 1 | 0 | 0  |
| 0 | 0 | #NULL! | 4 | 4 | 1 | 4  |
| 0 | 0 | #NULL! | 2 | 2 | 0 | 5  |
| 0 | 0 | #NULL! | 3 | 2 | 0 | 0  |
| 0 | 0 | #NULL! | 1 | 1 | 0 | 0  |
| 0 | 0 | #NULL! | 4 | 3 | 0 | 0  |
| 0 | 0 | #NULL! | 1 | 1 | 1 | 1  |
| 0 | 0 | #NULL! | 3 | 2 | 0 | 0  |
| 0 | 0 | #NULL! | 3 | 3 | 0 | 0  |
| 0 | 0 | #NULL! | 3 | 2 | 0 | 0  |
| 0 | 0 | #NULL! | 1 | 1 | 0 | 0  |
| 0 | 0 | #NULL! | 2 | 1 | 0 | 0  |
| 0 | 0 | #NULL! | 3 | 2 | 0 | 0  |
| 0 | 0 | #NULL! | 3 | 3 | 0 | 0  |
| 0 | 0 | #NULL! | 2 | 2 | 0 | 0  |
| 0 | 0 | #NULL! | 1 | 2 | 0 | 0  |
| 0 | 0 | #NULL! | 3 | 2 | 0 | 0  |
| 0 | 0 | #NULL! | 4 | 3 | 0 | 0  |
| 0 | 0 | #NULL! | 5 | 5 | 5 | 5  |
| 0 | 0 | #NULL! | 1 | 1 | 0 | 0  |
| 0 | 0 | #NULL! | 1 | 1 | 0 | 0  |
| 0 | 0 | #NULL! | 1 | 1 | 0 | 2  |
| 0 | 0 | #NULL! | 1 | 1 | 0 | 0  |
| 0 | 0 | #NULL! | 1 | 1 | 0 | 0  |
| 0 | 1 | #NULL! | 1 | 1 | 0 | 0  |
| 0 | 0 | #NULL! | 3 | 2 | 0 | 0  |
| 0 | 0 | #NULL! | 1 | 1 | 0 | 0  |
| 0 | 0 | #NULL! | 5 | 3 | 0 | 0  |
| 0 | 0 | #NULL! | 1 | 1 | 0 | 0  |
| 0 | 0 | #NULL! | 1 | 1 | 0 | 1  |
| 0 | 0 | #NULL! | 3 | 2 | 0 | 99 |
| 0 | 0 | #NULL! | 1 | 1 | 0 | 0  |
| 0 | 0 | #NULL! | 3 | 3 | 0 | 0  |
| 0 | 0 | #NULL! | 2 | 2 | 0 | 0  |
| 0 | 0 | #NULL! | 1 | 1 | 0 | 0  |
| 1 | 0 | #NULL! | 1 | 1 | 0 | 0  |
| 0 | 0 | #NULL! | 2 | 2 | 0 | 0  |
| 0 | 0 | #NULL! | 1 | 1 | 0 | 0  |
| 0 | 0 | #NULL! | 3 | 3 | 0 | 1  |
| 0 | 0 | #NULL! | 3 | 3 | 2 | 0  |
| 0 | 0 | #NULL! | 4 | 2 | 0 | 1  |
| 0 | 0 | #NULL! | 1 | 1 | 0 | 1  |



|   |   |        |   |   |    |    |
|---|---|--------|---|---|----|----|
| 0 | 0 | #NULL! | 1 | 1 | 0  | 0  |
| 0 | 0 | #NULL! | 1 | 1 | 0  | 0  |
| 0 | 0 | #NULL! | 3 | 2 | 0  | 0  |
| 0 | 0 | #NULL! | 4 | 2 | 0  | 0  |
| 0 | 0 | #NULL! | 3 | 3 | 0  | 0  |
| 0 | 0 | #NULL! | 4 | 1 | 0  | 0  |
| 0 | 0 | #NULL! | 1 | 1 | 0  | 0  |
| 0 | 0 | #NULL! | 1 | 1 | 0  | 0  |
| 0 | 0 | #NULL! | 1 | 1 | 0  | 0  |
| 0 | 0 | #NULL! | 1 | 1 | 0  | 0  |
| 0 | 0 | #NULL! | 1 | 1 | 0  | 0  |
| 0 | 0 | #NULL! | 1 | 1 | 0  | 0  |
| 0 | 0 | #NULL! | 1 | 1 | 0  | 0  |
| 0 | 0 | #NULL! | 1 | 1 | 0  | 0  |
| 0 | 0 | #NULL! | 5 | 1 | 0  | 0  |
| 0 | 0 | #NULL! | 1 | 1 | 0  | 0  |
| 0 | 0 | #NULL! | 2 | 5 | 0  | 0  |
| 0 | 0 | #NULL! | 4 | 1 | 0  | 0  |
| 0 | 0 | #NULL! | 1 | 1 | 0  | 0  |
| 0 | 0 | #NULL! | 3 | 2 | 0  | 0  |
| 0 | 0 | #NULL! | 1 | 1 | 0  | 1  |
| 0 | 0 | #NULL! | 1 | 1 | 0  | 0  |
| 0 | 0 | #NULL! | 1 | 1 | 0  | 0  |
| 0 | 0 | #NULL! | 3 | 2 | 0  | 0  |
| 0 | 0 | #NULL! | 3 | 3 | 0  | 0  |
| 0 | 0 | #NULL! | 3 | 2 | 0  | 0  |
| 0 | 0 | #NULL! | 5 | 5 | 0  | 0  |
| 0 | 0 | #NULL! | 4 | 2 | 0  | 0  |
| 0 | 0 | #NULL! | 3 | 2 | 0  | 0  |
| 0 | 0 | #NULL! | 1 | 1 | 0  | 0  |
| 0 | 0 | #NULL! | 1 | 1 | 0  | 0  |
| 0 | 0 | #NULL! | 1 | 1 | 0  | 0  |
| 0 | 0 | #NULL! | 1 | 2 | 0  | 1  |
| 0 | 0 | #NULL! | 1 | 1 | 0  | 0  |
| 0 | 0 | #NULL! | 3 | 1 | 0  | 0  |
| 0 | 0 | #NULL! | 2 | 1 | 0  | 0  |
| 0 | 0 | #NULL! | 1 | 1 | 0  | 0  |
| 0 | 0 | #NULL! | 1 | 1 | 99 | 99 |
| 0 | 0 | #NULL! | 1 | 1 | 0  | 0  |
| 0 | 0 | #NULL! | 1 | 1 | 0  | 0  |
| 0 | 0 | #NULL! | 2 | 2 | 0  | 0  |
| 0 | 0 | #NULL! | 3 | 2 | 0  | 0  |
| 0 | 0 | #NULL! | 1 | 1 | 0  | 1  |
| 0 | 0 | #NULL! | 3 | 1 | 0  | 0  |
| 0 | 0 | #NULL! | 1 | 1 | 0  | 0  |
| 0 | 0 | #NULL! | 1 | 1 | 0  | 0  |
| 0 | 0 | #NULL! | 2 | 3 | 0  | 0  |
| 0 | 0 | #NULL! | 3 | 2 | 0  | 0  |
| 0 | 0 | #NULL! | 3 | 2 | 0  | 0  |



|   |   |        |    |    |    |    |
|---|---|--------|----|----|----|----|
| 0 | 0 | #NULL! | 3  | 2  | 0  | 0  |
| 0 | 0 | #NULL! | 3  | 2  | 0  | 0  |
| 0 | 0 | #NULL! | 1  | 1  | 0  | 0  |
| 0 | 0 | #NULL! | 3  | 3  | 0  | 0  |
| 0 | 0 | #NULL! | 1  | 1  | 0  | 0  |
| 0 | 0 | #NULL! | 3  | 3  | 0  | 0  |
| 0 | 0 | #NULL! | 3  | 3  | 0  | 0  |
| 0 | 0 | #NULL! | 1  | 1  | 0  | 0  |
| 0 | 0 | #NULL! | 3  | 3  | 0  | 0  |
| 0 | 0 | #NULL! | 5  | 1  | 0  | 0  |
| 0 | 0 | #NULL! | 4  | 1  | 0  | 0  |
| 0 | 0 | #NULL! | 1  | 1  | 0  | 0  |
| 0 | 0 | #NULL! | 1  | 1  | 0  | 0  |
| 0 | 0 | #NULL! | 1  | 1  | 0  | 0  |
| 0 | 0 | #NULL! | 1  | 1  | 0  | 0  |
| 0 | 0 | #NULL! | 3  | 3  | 0  | 0  |
| 0 | 0 | #NULL! | 3  | 3  | 0  | 0  |
| 0 | 0 | #NULL! | 2  | 2  | 0  | 0  |
| 0 | 0 | #NULL! | 1  | 1  | 0  | 0  |
| 0 | 0 | #NULL! | 4  | 3  | 0  | 0  |
| 0 | 0 | #NULL! | 3  | 1  | 0  | 0  |
| 0 | 0 | #NULL! | 1  | 2  | 0  | 0  |
| 0 | 0 | #NULL! | 1  | 1  | 0  | 0  |
| 1 | 0 | #NULL! | 99 | 99 | 0  | 0  |
| 0 | 0 | #NULL! | 3  | 2  | 0  | 0  |
| 0 | 0 | #NULL! | 1  | 1  | 0  | 0  |
| 0 | 0 | #NULL! | 1  | 1  | 0  | 0  |
| 0 | 0 | #NULL! | 1  | 1  | 1  | 2  |
| 0 | 0 | #NULL! | 3  | 2  | 0  | 0  |
| 0 | 0 | #NULL! | 99 | 1  | 0  | 0  |
| 0 | 0 | #NULL! | 3  | 2  | 0  | 0  |
| 0 | 0 | #NULL! | 2  | 2  | 0  | 0  |
| 0 | 0 | #NULL! | 3  | 3  | 0  | 0  |
| 0 | 0 | #NULL! | 4  | 1  | 0  | 0  |
| 0 | 0 | #NULL! | 1  | 1  | 0  | 0  |
| 0 | 0 | #NULL! | 1  | 1  | 0  | 0  |
| 0 | 0 | #NULL! | 1  | 1  | 0  | 0  |
| 0 | 1 | #NULL! | 99 | 99 | 99 | 99 |
| 0 | 0 | #NULL! | 3  | 3  | 0  | 1  |
| 0 | 0 | #NULL! | 1  | 1  | 0  | 0  |
| 0 | 0 | #NULL! | 3  | 2  | 0  | 0  |
| 0 | 0 | #NULL! | 3  | 1  | 0  | 0  |
| 0 | 0 | #NULL! | 1  | 1  | 0  | 0  |
| 0 | 0 | #NULL! | 3  | 2  | 0  | 0  |
| 0 | 0 | #NULL! | 1  | 1  | 0  | 0  |
| 0 | 0 | #NULL! | 2  | 1  | 0  | 0  |
| 0 | 0 | #NULL! | 1  | 1  | 0  | 1  |
| 0 | 0 | #NULL! | 4  | 3  | 0  | 0  |

|   |   |        |   |   |    |    |
|---|---|--------|---|---|----|----|
| 0 | 0 | #NULL! | 1 | 1 | 0  | 0  |
| 0 | 0 | #NULL! | 5 | 3 | 0  | 0  |
| 0 | 0 | #NULL! | 1 | 1 | 0  | 0  |
| 0 | 0 | #NULL! | 1 | 1 | 0  | 0  |
| 0 | 0 | #NULL! | 4 | 3 | 0  | 0  |
| 0 | 0 | #NULL! | 3 | 3 | 0  | 0  |
| 0 | 0 | #NULL! | 3 | 3 | 0  | 0  |
| 0 | 0 | #NULL! | 3 | 3 | 0  | 0  |
| 0 | 0 | #NULL! | 4 | 3 | 0  | 0  |
| 0 | 0 | #NULL! | 4 | 2 | 0  | 0  |
| 0 | 0 | #NULL! | 3 | 2 | 0  | 1  |
| 0 | 0 | #NULL! | 3 | 2 | 0  | 0  |
| 0 | 0 | #NULL! | 4 | 3 | 0  | 0  |
| 0 | 0 | #NULL! | 2 | 1 | 0  | 1  |
| 0 | 0 | #NULL! | 3 | 2 | 0  | 0  |
| 0 | 0 | #NULL! | 1 | 1 | 0  | 0  |
| 0 | 0 | #NULL! | 1 | 1 | 0  | 0  |
| 0 | 0 | #NULL! | 2 | 1 | 0  | 0  |
| 0 | 0 | #NULL! | 3 | 1 | 0  | 0  |
| 0 | 0 | #NULL! | 1 | 2 | 0  | 0  |
| 0 | 0 | #NULL! | 3 | 1 | 0  | 0  |
| 0 | 0 | #NULL! | 1 | 2 | 0  | 0  |
| 0 | 0 | #NULL! | 2 | 2 | 99 | 99 |
| 0 | 0 | #NULL! | 1 | 1 | 0  | 0  |
| 0 | 0 | #NULL! | 1 | 2 | 0  | 0  |
| 0 | 0 | #NULL! | 1 | 1 | 0  | 0  |
| 0 | 0 | #NULL! | 1 | 1 | 0  | 0  |
| 0 | 0 | #NULL! | 1 | 1 | 0  | 0  |
| 0 | 0 | #NULL! | 3 | 2 | 0  | 0  |
| 0 | 0 | #NULL! | 1 | 1 | 0  | 0  |
| 0 | 0 | #NULL! | 3 | 1 | 0  | 0  |
| 0 | 0 | #NULL! | 1 | 1 | 0  | 0  |
| 0 | 0 | #NULL! | 1 | 1 | 0  | 0  |
| 0 | 0 | #NULL! | 1 | 1 | 0  | 0  |
| 0 | 0 | #NULL! | 1 | 1 | 0  | 0  |
| 0 | 0 | #NULL! | 1 | 1 | 0  | 0  |
| 0 | 0 | #NULL! | 2 | 1 | 0  | 0  |
| 0 | 0 | #NULL! | 1 | 1 | 0  | 0  |
| 0 | 0 | #NULL! | 3 | 2 | 0  | 0  |
| 0 | 0 | #NULL! | 1 | 1 | 0  | 0  |
| 0 | 0 | #NULL! | 2 | 3 | 0  | 0  |
| 0 | 0 | #NULL! | 1 | 2 | 0  | 0  |
| 0 | 0 | #NULL! | 1 | 1 | 0  | 0  |
| 0 | 0 | #NULL! | 3 | 3 | 0  | 0  |
| 0 | 0 | #NULL! | 1 | 1 | 0  | 0  |
| 0 | 0 | #NULL! | 3 | 3 | 0  | 0  |
| 0 | 0 | #NULL! | 3 | 1 | 0  | 0  |
| 0 | 0 | #NULL! | 3 | 3 | 0  | 0  |
| 0 | 0 | #NULL! | 2 | 2 | 0  | 0  |

|   |   |        |   |   |    |    |
|---|---|--------|---|---|----|----|
| 0 | 0 | #NULL! | 1 | 1 | 0  | 0  |
| 0 | 0 | #NULL! | 1 | 1 | 0  | 1  |
| 0 | 0 | #NULL! | 1 | 1 | 0  | 0  |
| 0 | 0 | #NULL! | 2 | 1 | 0  | 0  |
| 0 | 0 | #NULL! | 1 | 1 | 0  | 0  |
| 0 | 0 | #NULL! | 1 | 2 | 0  | 0  |
| 0 | 0 | #NULL! | 1 | 1 | 0  | 0  |
| 0 | 0 | #NULL! | 1 | 1 | 0  | 0  |
| 0 | 0 | #NULL! | 1 | 1 | 0  | 0  |
| 0 | 0 | #NULL! | 2 | 1 | 0  | 0  |
| 0 | 0 | #NULL! | 3 | 1 | 0  | 0  |
| 1 | 0 | #NULL! | 2 | 1 | 0  | 0  |
| 0 | 0 | #NULL! | 3 | 1 | 0  | 0  |
| 0 | 0 | #NULL! | 1 | 1 | 0  | 0  |
| 0 | 0 | #NULL! | 1 | 1 | 0  | 0  |
| 0 | 0 | #NULL! | 1 | 1 | 0  | 0  |
| 0 | 0 | #NULL! | 1 | 1 | 0  | 0  |
| 0 | 0 | #NULL! | 3 | 3 | 0  | 1  |
| 0 | 0 | #NULL! | 3 | 3 | 0  | 0  |
| 0 | 0 | #NULL! | 3 | 3 | 0  | 0  |
| 0 | 0 | #NULL! | 2 | 2 | 0  | 0  |
| 0 | 0 | #NULL! | 4 | 2 | 0  | 0  |
| 0 | 0 | #NULL! | 3 | 1 | 0  | 0  |
| 0 | 0 | #NULL! | 3 | 3 | 0  | 0  |
| 0 | 0 | #NULL! | 4 | 3 | 0  | 0  |
| 0 | 0 | #NULL! | 3 | 4 | 0  | 0  |
| 0 | 0 | #NULL! | 2 | 1 | 0  | 0  |
| 0 | 0 | #NULL! | 1 | 2 | 0  | 0  |
| 0 | 0 | #NULL! | 1 | 1 | 0  | 0  |
| 0 | 0 | #NULL! | 3 | 3 | 99 | 99 |
| 0 | 0 | #NULL! | 3 | 2 | 1  | 0  |
| 0 | 0 | #NULL! | 1 | 1 | 0  | 0  |
| 0 | 0 | #NULL! | 3 | 2 | 0  | 0  |
| 0 | 0 | #NULL! | 1 | 1 | 0  | 0  |
| 0 | 0 | #NULL! | 1 | 1 | 0  | 0  |
| 0 | 0 | #NULL! | 1 | 1 | 0  | 0  |
| 0 | 0 | #NULL! | 1 | 1 | 0  | 0  |
| 0 | 0 | #NULL! | 1 | 1 | 0  | 0  |
| 0 | 0 | #NULL! | 3 | 3 | 5  | 5  |
| 0 | 0 | #NULL! | 2 | 2 | 0  | 0  |
| 0 | 0 | #NULL! | 1 | 1 | 0  | 0  |
| 0 | 0 | #NULL! | 1 | 1 | 0  | 0  |
| 0 | 0 | #NULL! | 2 | 2 | 0  | 0  |
| 0 | 0 | #NULL! | 1 | 1 | 0  | 0  |
| 0 | 0 | #NULL! | 5 | 5 | 0  | 1  |
| 0 | 0 | #NULL! | 3 | 1 | 0  | 0  |
| 0 | 0 | #NULL! | 4 | 2 | 0  | 0  |
| 0 | 0 | #NULL! | 1 | 1 | 0  | 0  |
| 0 | 0 | #NULL! | 4 | 4 | 1  | 1  |

|   |   |        |   |   |    |    |
|---|---|--------|---|---|----|----|
| 0 | 0 | #NULL! | 3 | 3 | 2  | 5  |
| 0 | 0 | #NULL! | 3 | 2 | 1  | 5  |
| 0 | 0 | #NULL! | 3 | 2 | 0  | 0  |
| 0 | 0 | #NULL! | 1 | 1 | 0  | 0  |
| 0 | 0 | #NULL! | 1 | 1 | 0  | 1  |
| 0 | 0 | #NULL! | 1 | 1 | 0  | 0  |
| 0 | 0 | #NULL! | 1 | 1 | 0  | 0  |
| 0 | 0 | #NULL! | 1 | 1 | 1  | 0  |
| 0 | 0 | #NULL! | 5 | 1 | 0  | 0  |
| 0 | 0 | #NULL! | 1 | 1 | 0  | 0  |
| 0 | 0 | #NULL! | 2 | 2 | 1  | 1  |
| 0 | 0 | #NULL! | 3 | 3 | 0  | 0  |
| 0 | 0 | #NULL! | 1 | 2 | 0  | 2  |
| 0 | 0 | #NULL! | 3 | 2 | 0  | 1  |
| 0 | 0 | #NULL! | 3 | 3 | 3  | 3  |
| 0 | 0 | #NULL! | 1 | 2 | 0  | 1  |
| 0 | 0 | #NULL! | 3 | 1 | 0  | 0  |
| 0 | 0 | #NULL! | 1 | 1 | 0  | 2  |
| 0 | 0 | #NULL! | 2 | 1 | 2  | 0  |
| 0 | 0 | #NULL! | 1 | 1 | 0  | 0  |
| 0 | 0 | #NULL! | 1 | 2 | 3  | 3  |
| 0 | 0 | #NULL! | 3 | 2 | 0  | 0  |
| 0 | 0 | #NULL! | 2 | 2 | 0  | 99 |
| 0 | 0 | #NULL! | 1 | 1 | 0  | 1  |
| 0 | 0 | #NULL! | 1 | 1 | 0  | 0  |
| 0 | 0 | #NULL! | 1 | 2 | 99 | 99 |
| 0 | 0 | #NULL! | 3 | 2 | 0  | 0  |
| 0 | 0 | #NULL! | 2 | 1 | 0  | 0  |
| 0 | 0 | #NULL! | 3 | 2 | 0  | 0  |
| 1 | 0 | #NULL! | 3 | 2 | 0  | 0  |
| 0 | 0 | #NULL! | 2 | 1 | 0  | 2  |
| 0 | 0 | #NULL! | 2 | 1 | 0  | 0  |
| 0 | 0 | #NULL! | 1 | 1 | 0  | 0  |
| 0 | 0 | #NULL! | 3 | 2 | 0  | 0  |
| 0 | 0 | #NULL! | 3 | 3 | 0  | 99 |
| 0 | 0 | #NULL! | 3 | 2 | 0  | 0  |
| 0 | 0 | #NULL! | 1 | 1 | 0  | 0  |
| 0 | 0 | #NULL! | 3 | 2 | 0  | 0  |
| 0 | 0 | #NULL! | 3 | 3 | 0  | 0  |
| 0 | 0 | #NULL! | 1 | 3 | 0  | 1  |
| 0 | 0 | #NULL! | 3 | 3 | 0  | 1  |
| 0 | 0 | #NULL! | 1 | 1 | 0  | 0  |
| 0 | 0 | #NULL! | 2 | 3 | 0  | 0  |
| 0 | 0 | #NULL! | 3 | 1 | 0  | 0  |
| 0 | 0 | #NULL! | 3 | 2 | 0  | 0  |
| 0 | 0 | #NULL! | 1 | 1 | 0  | 0  |
| 0 | 0 | #NULL! | 4 | 2 | 0  | 0  |
| 0 | 0 | #NULL! | 2 | 1 | 0  | 0  |

|   |   |        |   |   |    |    |
|---|---|--------|---|---|----|----|
| 0 | 0 | #NULL! | 4 | 2 | 0  | 0  |
| 0 | 0 | #NULL! | 1 | 1 | 0  | 1  |
| 0 | 0 | #NULL! | 4 | 3 | 0  | 0  |
| 0 | 0 | #NULL! | 3 | 3 | 0  | 0  |
| 0 | 0 | #NULL! | 3 | 2 | 0  | 0  |
| 0 | 0 | #NULL! | 1 | 1 | 0  | 0  |
| 0 | 0 | #NULL! | 5 | 5 | 0  | 0  |
| 0 | 0 | #NULL! | 1 | 1 | 0  | 0  |
| 0 | 0 | #NULL! | 3 | 3 | 0  | 0  |
| 0 | 0 | #NULL! | 4 | 3 | 0  | 1  |
| 0 | 0 | #NULL! | 3 | 2 | 1  | 0  |
| 0 | 0 | #NULL! | 1 | 2 | 0  | 0  |
| 0 | 0 | #NULL! | 1 | 1 | 0  | 0  |
| 0 | 0 | #NULL! | 2 | 1 | 1  | 3  |
| 0 | 0 | #NULL! | 3 | 3 | 0  | 0  |
| 0 | 0 | #NULL! | 3 | 2 | 0  | 0  |
| 0 | 0 | #NULL! | 1 | 1 | 0  | 0  |
| 0 | 0 | #NULL! | 1 | 1 | 0  | 0  |
| 0 | 0 | #NULL! | 4 | 2 | 0  | 0  |
| 0 | 0 | #NULL! | 1 | 1 | 0  | 0  |
| 0 | 0 | #NULL! | 2 | 1 | 1  | 1  |
| 0 | 0 | #NULL! | 1 | 1 | 1  | 3  |
| 0 | 0 | #NULL! | 3 | 3 | 0  | 0  |
| 0 | 0 | #NULL! | 1 | 1 | 0  | 0  |
| 0 | 0 | #NULL! | 1 | 1 | 0  | 0  |
| 0 | 0 | #NULL! | 3 | 2 | 0  | 0  |
| 0 | 0 | #NULL! | 3 | 2 | 0  | 0  |
| 0 | 0 | #NULL! | 1 | 1 | 3  | 99 |
| 0 | 0 | #NULL! | 3 | 1 | 0  | 0  |
| 0 | 0 | #NULL! | 1 | 1 | 0  | 0  |
| 0 | 0 | #NULL! | 5 | 3 | 0  | 0  |
| 0 | 0 | #NULL! | 1 | 1 | 0  | 0  |
| 0 | 0 | #NULL! | 1 | 1 | 0  | 0  |
| 0 | 0 | #NULL! | 1 | 1 | 0  | 0  |
| 0 | 0 | #NULL! | 1 | 1 | 0  | 0  |
| 0 | 0 | #NULL! | 1 | 1 | 0  | 0  |
| 0 | 0 | #NULL! | 3 | 1 | 0  | 0  |
| 0 | 0 | #NULL! | 1 | 2 | 1  | 1  |
| 0 | 0 | #NULL! | 3 | 2 | 0  | 0  |
| 0 | 0 | #NULL! | 4 | 2 | 0  | 0  |
| 0 | 0 | #NULL! | 3 | 2 | 0  | 0  |
| 0 | 0 | #NULL! | 1 | 1 | 0  | 2  |
| 0 | 0 | #NULL! | 1 | 1 | 0  | 0  |
| 0 | 0 | #NULL! | 3 | 2 | 0  | 0  |
| 0 | 0 | #NULL! | 2 | 2 | 0  | 1  |
| 0 | 0 | #NULL! | 4 | 2 | 1  | 0  |
| 0 | 0 | #NULL! | 2 | 1 | 0  | 0  |
| 0 | 0 | #NULL! | 1 | 1 | 99 | 99 |

|   |   |        |   |   |    |    |
|---|---|--------|---|---|----|----|
| 0 | 0 | #NULL! | 1 | 1 | 0  | 0  |
| 0 | 0 | #NULL! | 1 | 1 | 0  | 0  |
| 0 | 0 | #NULL! | 1 | 1 | 0  | 0  |
| 0 | 0 | #NULL! | 1 | 1 | 0  | 0  |
| 0 | 0 | #NULL! | 1 | 1 | 0  | 0  |
| 0 | 0 | #NULL! | 1 | 1 | 0  | 0  |
| 0 | 0 | #NULL! | 1 | 1 | 0  | 0  |
| 1 | 0 | #NULL! | 3 | 3 | 0  | 1  |
| 0 | 0 | #NULL! | 2 | 1 | 0  | 0  |
| 0 | 0 | #NULL! | 3 | 2 | 0  | 1  |
| 0 | 0 | #NULL! | 3 | 1 | 0  | 0  |
| 0 | 0 | #NULL! | 1 | 1 | 1  | 1  |
| 0 | 0 | #NULL! | 3 | 3 | 0  | 0  |
| 0 | 0 | #NULL! | 3 | 3 | 0  | 0  |
| 0 | 0 | #NULL! | 1 | 1 | 0  | 0  |
| 0 | 0 | #NULL! | 1 | 1 | 2  | 1  |
| 0 | 0 | #NULL! | 2 | 2 | 0  | 0  |
| 0 | 0 | #NULL! | 3 | 2 | 0  | 2  |
| 0 | 0 | #NULL! | 5 | 3 | 99 | 99 |
| 0 | 0 | #NULL! | 5 | 5 | 99 | 99 |
| 0 | 0 | #NULL! | 3 | 1 | 1  | 1  |
| 0 | 0 | #NULL! | 2 | 2 | 1  | 0  |
| 0 | 0 | #NULL! | 2 | 1 | 0  | 0  |
| 0 | 0 | #NULL! | 3 | 3 | 0  | 0  |
| 0 | 0 | #NULL! | 5 | 3 | 0  | 0  |
| 0 | 0 | #NULL! | 2 | 1 | 0  | 0  |
| 0 | 0 | #NULL! | 3 | 2 | 0  | 0  |
| 0 | 0 | #NULL! | 1 | 1 | 0  | 0  |
| 0 | 1 | #NULL! | 2 | 1 | 0  | 0  |
| 0 | 0 | #NULL! | 2 | 2 | 0  | 0  |
| 0 | 0 | #NULL! | 1 | 1 | 0  | 0  |
| 0 | 0 | #NULL! | 3 | 3 | 0  | 0  |
| 0 | 0 | #NULL! | 4 | 2 | 0  | 0  |
| 0 | 0 | #NULL! | 3 | 1 | 0  | 0  |
| 0 | 0 | #NULL! | 4 | 1 | 0  | 0  |
| 0 | 0 | #NULL! | 3 | 3 | 0  | 1  |
| 0 | 0 | #NULL! | 4 | 3 | 0  | 0  |
| 0 | 0 | #NULL! | 4 | 3 | 0  | 0  |
| 0 | 0 | #NULL! | 2 | 1 | 0  | 0  |
| 0 | 0 | #NULL! | 3 | 2 | 0  | 0  |
| 0 | 0 | #NULL! | 2 | 1 | 0  | 0  |
| 0 | 0 | #NULL! | 3 | 3 | 0  | 0  |
| 0 | 0 | #NULL! | 1 | 2 | 0  | 0  |
| 0 | 0 | #NULL! | 1 | 1 | 0  | 0  |
| 0 | 0 | #NULL! | 1 | 1 | 0  | 0  |
| 0 | 0 | #NULL! | 1 | 1 | 0  | 5  |
| 0 | 0 | #NULL! | 1 | 1 | 0  | 0  |
| 0 | 0 | #NULL! | 3 | 3 | 0  | 1  |

|   |   |        |   |   |   |    |
|---|---|--------|---|---|---|----|
| 0 | 0 | #NULL! | 1 | 1 | 0 | 0  |
| 0 | 0 | #NULL! | 2 | 1 | 0 | 0  |
| 0 | 0 | #NULL! | 1 | 1 | 0 | 0  |
| 0 | 0 | #NULL! | 2 | 1 | 0 | 1  |
| 0 | 0 | #NULL! | 3 | 3 | 1 | 2  |
| 0 | 0 | #NULL! | 5 | 3 | 0 | 0  |
| 0 | 0 | #NULL! | 1 | 1 | 0 | 2  |
| 0 | 0 | #NULL! | 1 | 1 | 0 | 0  |
| 0 | 0 | #NULL! | 3 | 2 | 0 | 0  |
| 0 | 0 | #NULL! | 2 | 1 | 0 | 0  |
| 0 | 0 | #NULL! | 1 | 1 | 0 | 0  |
| 0 | 0 | #NULL! | 1 | 1 | 0 | 0  |
| 0 | 0 | #NULL! | 5 | 3 | 0 | 0  |
| 0 | 0 | #NULL! | 3 | 3 | 0 | 0  |
| 0 | 0 | #NULL! | 1 | 1 | 0 | 0  |
| 0 | 0 | #NULL! | 1 | 1 | 1 | 0  |
| 0 | 0 | #NULL! | 1 | 1 | 0 | 0  |
| 0 | 0 | #NULL! | 4 | 2 | 0 | 99 |
| 0 | 0 | #NULL! | 3 | 2 | 0 | 0  |
| 0 | 0 | #NULL! | 2 | 2 | 3 | 2  |
| 0 | 0 | #NULL! | 2 | 2 | 0 | 0  |
| 0 | 0 | #NULL! | 3 | 1 | 0 | 0  |
| 0 | 0 | #NULL! | 1 | 1 | 0 | 1  |
| 0 | 0 | #NULL! | 1 | 1 | 1 | 1  |
| 0 | 0 | #NULL! | 1 | 1 | 0 | 0  |
| 0 | 0 | #NULL! | 2 | 2 | 1 | 1  |
| 0 | 0 | #NULL! | 3 | 3 | 0 | 1  |
| 0 | 0 | #NULL! | 5 | 3 | 0 | 1  |
| 0 | 0 | #NULL! | 1 | 3 | 0 | 0  |
| 0 | 0 | #NULL! | 2 | 2 | 2 | 2  |
| 0 | 0 | #NULL! | 2 | 2 | 0 | 1  |
| 0 | 0 | #NULL! | 3 | 2 | 0 | 2  |
| 0 | 0 | #NULL! | 3 | 2 | 0 | 1  |
| 0 | 0 | #NULL! | 1 | 1 | 0 | 0  |
| 0 | 0 | #NULL! | 1 | 1 | 0 | 0  |
| 0 | 0 | #NULL! | 3 | 2 | 0 | 1  |
| 0 | 0 | #NULL! | 3 | 3 | 0 | 1  |
| 0 | 0 | #NULL! | 3 | 3 | 0 | 1  |
| 1 | 0 | #NULL! | 3 | 2 | 0 | 0  |
| 0 | 0 | #NULL! | 3 | 3 | 0 | 0  |
| 0 | 0 | #NULL! | 2 | 1 | 0 | 0  |
| 0 | 0 | #NULL! | 3 | 2 | 1 | 2  |
| 0 | 0 | #NULL! | 2 | 1 | 1 | 3  |
| 0 | 0 | #NULL! | 3 | 3 | 0 | 0  |
| 0 | 0 | #NULL! | 3 | 2 | 0 | 1  |
| 0 | 0 | #NULL! | 1 | 1 | 0 | 0  |
| 0 | 0 | #NULL! | 2 | 3 | 1 | 2  |
| 1 | 0 | #NULL! | 3 | 2 | 0 | 0  |

|   |   |        |   |   |    |    |
|---|---|--------|---|---|----|----|
| 0 | 0 | #NULL! | 1 | 1 | 0  | 0  |
| 0 | 0 | #NULL! | 4 | 3 | 0  | 0  |
| 0 | 0 | #NULL! | 1 | 1 | 0  | 0  |
| 0 | 0 | #NULL! | 1 | 1 | 0  | 0  |
| 0 | 1 | #NULL! | 1 | 1 | 0  | 1  |
| 0 | 0 | #NULL! | 5 | 2 | 0  | 1  |
| 0 | 0 | #NULL! | 3 | 3 | 0  | 0  |
| 0 | 0 | #NULL! | 1 | 1 | 0  | 0  |
| 0 | 0 | #NULL! | 1 | 1 | 0  | 0  |
| 0 | 0 | #NULL! | 1 | 1 | 0  | 0  |
| 0 | 0 | #NULL! | 1 | 3 | 0  | 0  |
| 0 | 0 | #NULL! | 1 | 1 | 0  | 0  |
| 0 | 0 | #NULL! | 1 | 3 | 0  | 0  |
| 0 | 0 | #NULL! | 2 | 1 | 0  | 0  |
| 0 | 0 | #NULL! | 5 | 4 | 0  | 2  |
| 0 | 0 | #NULL! | 1 | 1 | 0  | 0  |
| 0 | 0 | #NULL! | 3 | 3 | 0  | 0  |
| 0 | 0 | #NULL! | 2 | 2 | 0  | 0  |
| 0 | 0 | #NULL! | 3 | 3 | 0  | 0  |
| 0 | 0 | #NULL! | 3 | 3 | 0  | 0  |
| 0 | 0 | #NULL! | 5 | 2 | 0  | 0  |
| 0 | 0 | #NULL! | 1 | 1 | 0  | 0  |
| 0 | 0 | #NULL! | 4 | 2 | 0  | 0  |
| 0 | 0 | #NULL! | 2 | 2 | 99 | 1  |
| 0 | 0 | #NULL! | 1 | 1 | 0  | 0  |
| 0 | 0 | #NULL! | 3 | 1 | 0  | 0  |
| 0 | 0 | #NULL! | 1 | 1 | 0  | 0  |
| 0 | 0 | #NULL! | 2 | 2 | 0  | 0  |
| 0 | 0 | #NULL! | 3 | 1 | 0  | 0  |
| 0 | 0 | #NULL! | 1 | 1 | 0  | 0  |
| 0 | 0 | #NULL! | 1 | 1 | 0  | 0  |
| 0 | 0 | #NULL! | 4 | 3 | 0  | 99 |
| 0 | 0 | #NULL! | 3 | 1 | 0  | 5  |
| 0 | 0 | #NULL! | 1 | 1 | 0  | 0  |
| 0 | 0 | #NULL! | 1 | 1 | 0  | 0  |
| 0 | 0 | #NULL! | 1 | 1 | 0  | 0  |
| 0 | 0 | #NULL! | 3 | 2 | 0  | 0  |
| 0 | 0 | #NULL! | 2 | 3 | 0  | 0  |
| 0 | 0 | #NULL! | 3 | 3 | 0  | 0  |
| 0 | 0 | #NULL! | 1 | 1 | 0  | 0  |
| 0 | 0 | #NULL! | 2 | 1 | 0  | 0  |
| 0 | 0 | #NULL! | 1 | 1 | 0  | 0  |
| 0 | 0 | #NULL! | 3 | 3 | 0  | 0  |
| 0 | 0 | #NULL! | 3 | 3 | 0  | 0  |
| 0 | 0 | #NULL! | 3 | 3 | 0  | 0  |
| 0 | 0 | #NULL! | 3 | 2 | 0  | 0  |
| 0 | 0 | #NULL! | 3 | 3 | 0  | 1  |
| 0 | 0 | #NULL! | 3 | 3 | 0  | 0  |
| 0 | 0 | #NULL! | 3 | 2 | 0  | 2  |



|   |   |        |    |   |   |   |
|---|---|--------|----|---|---|---|
| 0 | 0 | #NULL! | 1  | 1 | 0 | 0 |
| 0 | 0 | #NULL! | 3  | 2 | 0 | 0 |
| 0 | 0 | #NULL! | 1  | 1 | 0 | 0 |
| 0 | 0 | #NULL! | 5  | 1 | 0 | 0 |
| 0 | 0 | #NULL! | 3  | 3 | 0 | 0 |
| 0 | 0 | #NULL! | 3  | 2 | 0 | 0 |
| 0 | 0 | #NULL! | 4  | 1 | 0 | 0 |
| 0 | 0 | #NULL! | 1  | 1 | 0 | 0 |
| 0 | 0 | #NULL! | 1  | 1 | 0 | 0 |
| 0 | 0 | #NULL! | 2  | 2 | 0 | 0 |
| 0 | 0 | #NULL! | 3  | 2 | 4 | 5 |
| 0 | 0 | #NULL! | 3  | 3 | 0 | 0 |
| 0 | 0 | #NULL! | 4  | 3 | 0 | 0 |
| 0 | 0 | #NULL! | 4  | 2 | 0 | 0 |
| 0 | 0 | #NULL! | 1  | 1 | 5 | 0 |
| 0 | 0 | #NULL! | 2  | 2 | 0 | 0 |
| 0 | 0 | #NULL! | 3  | 1 | 0 | 0 |
| 0 | 0 | #NULL! | 3  | 3 | 0 | 0 |
| 1 | 0 | #NULL! | 3  | 1 | 0 | 0 |
| 0 | 0 | #NULL! | 3  | 2 | 0 | 0 |
| 0 | 0 | #NULL! | 3  | 2 | 0 | 0 |
| 0 | 0 | #NULL! | 3  | 2 | 0 | 0 |
| 0 | 0 | #NULL! | 3  | 3 | 0 | 1 |
| 0 | 0 | #NULL! | 3  | 3 | 0 | 1 |
| 0 | 0 | #NULL! | 1  | 1 | 0 | 0 |
| 0 | 0 | #NULL! | 3  | 2 | 0 | 1 |
| 0 | 0 | #NULL! | 2  | 2 | 2 | 1 |
| 0 | 0 | #NULL! | 1  | 1 | 0 | 0 |
| 0 | 0 | #NULL! | 1  | 1 | 0 | 0 |
| 0 | 0 | #NULL! | 4  | 2 | 0 | 1 |
| 0 | 0 | #NULL! | 1  | 1 | 0 | 0 |
| 0 | 0 | #NULL! | 1  | 1 | 0 | 0 |
| 0 | 0 | #NULL! | 2  | 1 | 0 | 1 |
| 0 | 0 | #NULL! | 2  | 2 | 0 | 0 |
| 0 | 0 | #NULL! | 1  | 1 | 0 | 0 |
| 0 | 0 | #NULL! | 3  | 3 | 0 | 0 |
| 0 | 0 | #NULL! | 3  | 1 | 0 | 0 |
| 0 | 0 | #NULL! | 1  | 1 | 0 | 0 |
| 0 | 0 | #NULL! | 1  | 1 | 0 | 0 |
| 0 | 0 | #NULL! | 1  | 2 | 1 | 1 |
| 0 | 0 | #NULL! | 3  | 1 | 0 | 0 |
| 0 | 0 | #NULL! | 2  | 2 | 0 | 0 |
| 0 | 0 | #NULL! | 1  | 1 | 0 | 0 |
| 0 | 0 | #NULL! | 3  | 1 | 0 | 0 |
| 0 | 0 | #NULL! | 1  | 1 | 0 | 0 |
| 0 | 0 | #NULL! | 1  | 2 | 0 | 0 |
| 0 | 0 | #NULL! | 99 | 1 | 0 | 0 |
| 0 | 0 | #NULL! | 3  | 3 | 0 | 0 |

|   |   |        |   |    |   |    |
|---|---|--------|---|----|---|----|
| 0 | 0 | #NULL! | 1 | 1  | 0 | 0  |
| 0 | 0 | #NULL! | 5 | 1  | 0 | 0  |
| 0 | 0 | #NULL! | 1 | 1  | 0 | 0  |
| 0 | 0 | #NULL! | 3 | 1  | 0 | 0  |
| 0 | 0 | #NULL! | 2 | 1  | 0 | 0  |
| 0 | 0 | #NULL! | 4 | 2  | 0 | 0  |
| 0 | 0 | #NULL! | 1 | 1  | 0 | 0  |
| 0 | 0 | #NULL! | 3 | 1  | 0 | 0  |
| 0 | 0 | #NULL! | 1 | 1  | 0 | 0  |
| 0 | 0 | #NULL! | 3 | 2  | 0 | 0  |
| 0 | 0 | #NULL! | 3 | 1  | 0 | 99 |
| 0 | 0 | #NULL! | 1 | 1  | 0 | 0  |
| 0 | 0 | #NULL! | 1 | 1  | 0 | 0  |
| 0 | 0 | #NULL! | 3 | 1  | 0 | 0  |
| 0 | 0 | #NULL! | 3 | 3  | 0 | 0  |
| 1 | 0 | #NULL! | 1 | 1  | 4 | 1  |
| 0 | 0 | #NULL! | 1 | 1  | 0 | 0  |
| 0 | 0 | #NULL! | 2 | 1  | 0 | 0  |
| 0 | 0 | #NULL! | 1 | 1  | 0 | 0  |
| 0 | 0 | #NULL! | 1 | 1  | 0 | 0  |
| 0 | 0 | #NULL! | 1 | 1  | 0 | 0  |
| 0 | 0 | #NULL! | 5 | 2  | 0 | 0  |
| 0 | 0 | #NULL! | 1 | 1  | 0 | 0  |
| 0 | 0 | #NULL! | 4 | 3  | 0 | 0  |
| 0 | 0 | #NULL! | 2 | 2  | 0 | 0  |
| 0 | 0 | #NULL! | 1 | 1  | 0 | 0  |
| 0 | 0 | #NULL! | 3 | 2  | 0 | 0  |
| 0 | 0 | #NULL! | 1 | 1  | 0 | 0  |
| 0 | 0 | #NULL! | 3 | 3  | 0 | 0  |
| 0 | 0 | #NULL! | 1 | 1  | 0 | 0  |
| 0 | 0 | #NULL! | 1 | 1  | 0 | 0  |
| 0 | 0 | #NULL! | 3 | 2  | 0 | 99 |
| 0 | 0 | #NULL! | 1 | 1  | 0 | 0  |
| 0 | 0 | #NULL! | 3 | 3  | 0 | 0  |
| 0 | 0 | #NULL! | 1 | 1  | 0 | 0  |
| 0 | 0 | #NULL! | 3 | 2  | 1 | 1  |
| 0 | 0 | #NULL! | 4 | 3  | 0 | 0  |
| 0 | 0 | #NULL! | 1 | 1  | 0 | 0  |
| 0 | 0 | #NULL! | 1 | 1  | 0 | 0  |
| 0 | 0 | #NULL! | 1 | 1  | 0 | 0  |
| 0 | 0 | #NULL! | 3 | 2  | 0 | 0  |
| 0 | 0 | #NULL! | 2 | 2  | 0 | 1  |
| 0 | 0 | #NULL! | 1 | 1  | 4 | 3  |
| 0 | 0 | #NULL! | 3 | 1  | 0 | 0  |
| 0 | 0 | #NULL! | 1 | 1  | 0 | 0  |
| 0 | 0 | #NULL! | 3 | 3  | 0 | 0  |
| 0 | 0 | #NULL! | 2 | 99 | 0 | 0  |
| 0 | 0 | #NULL! | 3 | 2  | 0 | 0  |

|   |   |        |   |   |   |   |
|---|---|--------|---|---|---|---|
| 0 | 0 | #NULL! | 1 | 1 | 0 | 0 |
| 1 | 0 | #NULL! | 1 | 2 | 1 | 5 |
| 0 | 0 | #NULL! | 1 | 1 | 0 | 0 |
| 0 | 0 | #NULL! | 1 | 1 | 0 | 0 |
| 0 | 0 | #NULL! | 3 | 3 | 0 | 0 |
| 0 | 0 | #NULL! | 3 | 3 | 0 | 0 |
| 0 | 0 | #NULL! | 1 | 1 | 0 | 0 |
| 0 | 0 | #NULL! | 1 | 1 | 0 | 0 |
| 0 | 0 | #NULL! | 1 | 1 | 0 | 0 |
| 0 | 0 | #NULL! | 1 | 1 | 0 | 0 |
| 0 | 0 | #NULL! | 1 | 1 | 0 | 0 |
| 0 | 0 | #NULL! | 4 | 2 | 1 | 1 |
| 0 | 0 | #NULL! | 1 | 1 | 4 | 0 |
| 0 | 0 | #NULL! | 1 | 1 | 0 | 0 |
| 0 | 0 | #NULL! | 1 | 1 | 0 | 1 |
| 0 | 0 | #NULL! | 3 | 2 | 0 | 0 |
| 0 | 0 | #NULL! | 3 | 2 | 0 | 0 |
| 0 | 0 | #NULL! | 1 | 1 | 0 | 0 |
| 0 | 0 | #NULL! | 3 | 3 | 0 | 1 |
| 0 | 0 | #NULL! | 1 | 1 | 0 | 0 |
| 0 | 0 | #NULL! | 3 | 2 | 0 | 0 |
| 0 | 0 | #NULL! | 3 | 1 | 0 | 0 |
| 0 | 0 | #NULL! | 3 | 3 | 0 | 0 |
| 0 | 0 | #NULL! | 3 | 3 | 0 | 0 |
| 0 | 0 | #NULL! | 1 | 1 | 0 | 0 |
| 0 | 0 | #NULL! | 3 | 2 | 0 | 0 |
| 0 | 0 | #NULL! | 1 | 1 | 0 | 0 |
| 0 | 0 | #NULL! | 1 | 1 | 0 | 0 |
| 0 | 0 | #NULL! | 1 | 1 | 0 | 0 |
| 0 | 0 | #NULL! | 3 | 1 | 0 | 0 |
| 0 | 0 | #NULL! | 1 | 1 | 0 | 0 |
| 0 | 0 | #NULL! | 3 | 3 | 0 | 0 |
| 0 | 0 | #NULL! | 3 | 2 | 0 | 0 |
| 0 | 0 | #NULL! | 1 | 1 | 0 | 0 |
| 0 | 0 | #NULL! | 1 | 1 | 0 | 0 |
| 0 | 0 | #NULL! | 3 | 1 | 0 | 3 |
| 0 | 0 | #NULL! | 4 | 3 | 0 | 0 |
| 0 | 0 | #NULL! | 5 | 5 | 0 | 1 |
| 0 | 0 | #NULL! | 1 | 1 | 0 | 0 |
| 0 | 0 | #NULL! | 5 | 3 | 0 | 2 |
| 0 | 0 | #NULL! | 1 | 1 | 0 | 0 |
| 0 | 0 | #NULL! | 1 | 2 | 1 | 0 |
| 0 | 0 | #NULL! | 3 | 4 | 0 | 0 |
| 0 | 0 | #NULL! | 3 | 1 | 2 | 3 |
| 0 | 0 | #NULL! | 1 | 1 | 0 | 0 |
| 0 | 0 | #NULL! | 3 | 1 | 0 | 0 |
| 0 | 0 | #NULL! | 5 | 2 | 0 | 0 |
| 0 | 0 | #NULL! | 1 | 1 | 0 | 0 |
| 0 | 0 | #NULL! | 2 | 2 | 0 | 0 |

|   |   |        |   |    |   |    |
|---|---|--------|---|----|---|----|
| 0 | 0 | #NULL! | 1 | 1  | 0 | 0  |
| 0 | 0 | #NULL! | 2 | 1  | 2 | 2  |
| 0 | 0 | #NULL! | 3 | 2  | 1 | 4  |
| 0 | 0 | #NULL! | 1 | 1  | 0 | 0  |
| 0 | 0 | #NULL! | 1 | 1  | 0 | 0  |
| 0 | 0 | #NULL! | 1 | 2  | 0 | 0  |
| 0 | 0 | #NULL! | 3 | 3  | 0 | 0  |
| 0 | 0 | #NULL! | 3 | 3  | 0 | 0  |
| 0 | 0 | #NULL! | 3 | 2  | 0 | 0  |
| 0 | 0 | #NULL! | 3 | 3  | 0 | 0  |
| 1 | 0 | #NULL! | 2 | 2  | 0 | 0  |
| 0 | 0 | #NULL! | 1 | 1  | 0 | 0  |
| 0 | 0 | #NULL! | 1 | 1  | 0 | 0  |
| 0 | 0 | #NULL! | 3 | 2  | 0 | 1  |
| 1 | 0 | #NULL! | 5 | 1  | 0 | 0  |
| 0 | 0 | #NULL! | 4 | 3  | 0 | 0  |
| 0 | 0 | #NULL! | 1 | 1  | 5 | 99 |
| 0 | 0 | #NULL! | 3 | 2  | 0 | 0  |
| 0 | 0 | #NULL! | 5 | 3  | 0 | 0  |
| 0 | 0 | #NULL! | 4 | 1  | 0 | 1  |
| 1 | 0 | #NULL! | 2 | 2  | 0 | 0  |
| 0 | 0 | #NULL! | 1 | 1  | 0 | 0  |
| 0 | 0 | #NULL! | 4 | 2  | 0 | 0  |
| 0 | 0 | #NULL! | 3 | 2  | 0 | 0  |
| 0 | 0 | #NULL! | 4 | 1  | 0 | 0  |
| 0 | 0 | #NULL! | 3 | 3  | 2 | 1  |
| 0 | 0 | #NULL! | 4 | 3  | 0 | 0  |
| 0 | 0 | #NULL! | 3 | 3  | 0 | 0  |
| 0 | 0 | #NULL! | 3 | 2  | 0 | 0  |
| 0 | 0 | #NULL! | 3 | 2  | 0 | 0  |
| 0 | 0 | #NULL! | 1 | 1  | 0 | 0  |
| 0 | 0 | #NULL! | 1 | 1  | 0 | 0  |
| 0 | 0 | #NULL! | 1 | 1  | 0 | 1  |
| 0 | 0 | #NULL! | 1 | 1  | 0 | 0  |
| 0 | 0 | #NULL! | 3 | 2  | 1 | 2  |
| 0 | 0 | #NULL! | 1 | 99 | 0 | 0  |
| 0 | 0 | #NULL! | 4 | 2  | 0 | 0  |
| 0 | 0 | #NULL! | 1 | 3  | 0 | 0  |
| 0 | 0 | #NULL! | 1 | 1  | 1 | 1  |
| 0 | 0 | #NULL! | 1 | 1  | 0 | 0  |
| 0 | 0 | #NULL! | 1 | 1  | 0 | 0  |
| 0 | 0 | #NULL! | 1 | 1  | 0 | 0  |
| 0 | 0 | #NULL! | 4 | 3  | 0 | 0  |
| 0 | 0 | #NULL! | 1 | 1  | 0 | 0  |
| 0 | 0 | #NULL! | 1 | 1  | 0 | 0  |
| 0 | 0 | #NULL! | 4 | 3  | 0 | 2  |
| 0 | 0 | #NULL! | 2 | 1  | 0 | 0  |
| 0 | 0 | #NULL! | 1 | 1  | 0 | 0  |

|   |   |        |   |        |   |   |
|---|---|--------|---|--------|---|---|
| 0 | 0 | #NULL! | 1 | 1      | 0 | 0 |
| 0 | 0 | #NULL! | 3 | 3      | 1 | 2 |
| 0 | 0 | #NULL! | 3 | 2      | 0 | 0 |
| 0 | 0 | #NULL! | 3 | 2      | 0 | 0 |
| 0 | 0 | #NULL! | 1 | 1      | 0 | 0 |
| 0 | 0 | #NULL! | 1 | 1      | 0 | 0 |
| 0 | 0 | #NULL! | 4 | 3      | 0 | 0 |
| 0 | 0 | #NULL! | 1 | 1      | 0 | 0 |
| 0 | 0 | #NULL! | 1 | 1      | 1 | 0 |
| 0 | 0 | #NULL! | 1 | 1      | 1 | 0 |
| 0 | 0 | #NULL! | 3 | 2      | 0 | 0 |
| 1 | 0 | #NULL! | 2 | #NULL! | 0 | 0 |
| 0 | 0 | #NULL! | 1 | 1      | 0 | 0 |
| 0 | 0 | #NULL! | 1 | 1      | 0 | 0 |
| 0 | 0 | #NULL! | 1 | 1      | 0 | 0 |
| 0 | 0 | #NULL! | 1 | 1      | 0 | 0 |
| 0 | 0 | #NULL! | 4 | 2      | 0 | 0 |
| 0 | 0 | #NULL! | 4 | 2      | 0 | 0 |
| 0 | 0 | #NULL! | 1 | 1      | 0 | 0 |
| 0 | 0 | #NULL! | 1 | 1      | 0 | 0 |
| 0 | 0 | #NULL! | 3 | 2      | 0 | 0 |
| 0 | 0 | #NULL! | 1 | 1      | 0 | 0 |
| 0 | 0 | #NULL! | 1 | 1      | 0 | 0 |
| 0 | 0 | #NULL! | 1 | 1      | 0 | 0 |
| 0 | 0 | #NULL! | 3 | 2      | 0 | 0 |
| 0 | 0 | #NULL! | 3 | 2      | 0 | 0 |
| 0 | 0 | #NULL! | 1 | 1      | 0 | 0 |
| 0 | 0 | #NULL! | 3 | 2      | 0 | 0 |
| 0 | 0 | #NULL! | 1 | 1      | 0 | 0 |
| 0 | 0 | #NULL! | 2 | 2      | 2 | 2 |
| 0 | 0 | #NULL! | 2 | 2      | 0 | 0 |
| 0 | 0 | #NULL! | 4 | 4      | 0 | 5 |
| 0 | 0 | #NULL! | 4 | 2      | 0 | 1 |
| 0 | 0 | #NULL! | 1 | 2      | 0 | 0 |
| 0 | 0 | #NULL! | 1 | 1      | 0 | 0 |
| 0 | 0 | #NULL! | 1 | 1      | 5 | 5 |
| 0 | 0 | #NULL! | 3 | 1      | 0 | 0 |
| 0 | 0 | #NULL! | 1 | 1      | 0 | 0 |
| 0 | 0 | #NULL! | 3 | 3      | 0 | 0 |
| 0 | 0 | #NULL! | 5 | 5      | 0 | 0 |
| 0 | 0 | #NULL! | 1 | 1      | 0 | 0 |
| 0 | 0 | #NULL! | 3 | 3      | 0 | 0 |
| 0 | 0 | #NULL! | 1 | 1      | 0 | 4 |
| 0 | 0 | #NULL! | 5 | 1      | 0 | 0 |
| 0 | 0 | #NULL! | 1 | 1      | 0 | 5 |
| 0 | 0 | #NULL! | 1 | 1      | 0 | 0 |
| 0 | 0 | #NULL! | 1 | 1      | 0 | 0 |
| 0 | 0 | #NULL! | 5 | 3      | 0 | 0 |

|   |   |        |        |        |        |        |
|---|---|--------|--------|--------|--------|--------|
| 0 | 0 | #NULL! | 2      | 1      | 0      | 0      |
| 0 | 0 | #NULL! | 1      | 1      | 0      | 0      |
| 0 | 0 | #NULL! | 1      | 1      | 0      | 0      |
| 0 | 0 | #NULL! | 1      | 1      | 0      | 0      |
| 0 | 0 | #NULL! | 1      | 2      | 0      | 0      |
| 0 | 0 | #NULL! | 1      | 1      | 0      | 0      |
| 0 | 0 | #NULL! | 1      | 1      | 1      | 2      |
| 0 | 0 | #NULL! | 1      | 1      | 0      | 0      |
| 0 | 0 | #NULL! | 5      | #NULL! | 0      | 0      |
| 0 | 0 | #NULL! | 1      | 1      | 5      | 4      |
| 0 | 0 | #NULL! | 5      | 1      | 0      | 0      |
| 0 | 0 | #NULL! | 1      | 2      | 2      | 2      |
| 0 | 0 | #NULL! | #NULL! | #NULL! | #NULL! | #NULL! |
| 0 | 0 | #NULL! | 1      | 1      | 0      | 0      |
| 0 | 0 | #NULL! | 1      | 1      | 0      | 0      |
| 0 | 0 | #NULL! | 3      | 3      | 0      | 0      |
| 0 | 0 | #NULL! | 1      | 1      | 0      | 0      |
| 0 | 0 | #NULL! | 3      | 3      | 0      | 0      |
| 0 | 0 | #NULL! | 3      | 3      | 0      | 1      |
| 0 | 0 | #NULL! | 3      | 2      | 0      | 0      |
| 0 | 0 | #NULL! | 3      | 2      | 0      | 1      |
| 0 | 0 | #NULL! | 5      | 2      | 1      | 3      |
| 0 | 0 | #NULL! | 3      | 3      | 0      | 0      |
| 0 | 0 | #NULL! | 4      | 1      | 0      | 0      |
| 1 | 0 | #NULL! | 5      | 5      | 0      | 0      |
| 0 | 0 | #NULL! | 3      | 1      | 0      | 0      |
| 0 | 0 | #NULL! | 1      | 1      | 1      | 1      |
| 0 | 0 | #NULL! | 1      | 1      | 0      | 0      |
| 0 | 0 | #NULL! | 2      | 2      | 0      | 0      |
| 0 | 0 | #NULL! | 3      | 1      | 0      | 0      |
| 0 | 0 | #NULL! | 3      | 2      | 0      | 0      |
| 0 | 0 | #NULL! | 3      | 2      | 0      | 0      |
| 0 | 0 | #NULL! | 1      | 1      | 0      | 0      |
| 0 | 0 | #NULL! | 3      | 1      | 0      | 0      |
| 0 | 0 | #NULL! | 1      | 1      | 0      | 0      |
| 0 | 0 | #NULL! | 4      | 2      | 0      | 0      |
| 0 | 0 | #NULL! | 1      | 1      | 0      | 0      |
| 0 | 0 | #NULL! | 4      | 1      | 0      | 0      |
| 0 | 0 | #NULL! | 3      | 2      | 0      | 0      |
| 0 | 0 | #NULL! | 1      | 1      | 0      | 0      |
| 0 | 0 | #NULL! | 3      | 2      | 0      | 0      |
| 0 | 0 | #NULL! | 3      | 1      | 0      | 0      |
| 0 | 0 | #NULL! | 3      | 3      | 0      | 0      |
| 0 | 0 | #NULL! | 1      | 1      | 0      | 0      |
| 0 | 0 | #NULL! | 1      | 1      | 1      | 5      |
| 0 | 0 | #NULL! | 1      | 2      | 0      | 0      |
| 0 | 0 | #NULL! | 4      | 2      | 0      | 0      |
| 0 | 0 | #NULL! | 3      | 3      | 0      | 0      |

|   |   |        |        |        |        |        |
|---|---|--------|--------|--------|--------|--------|
| 0 | 0 | #NULL! | 1      | 1      | 0      | 0      |
| 0 | 0 | #NULL! | 3      | 2      | 0      | 0      |
| 0 | 0 | #NULL! | 1      | 1      | 0      | 0      |
| 0 | 0 | #NULL! | #NULL! | #NULL! | 0      | 0      |
| 0 | 0 | #NULL! | 3      | 3      | 0      | 0      |
| 0 | 0 | #NULL! | 3      | 2      | 0      | 0      |
| 0 | 0 | #NULL! | 3      | 2      | 0      | 0      |
| 0 | 0 | #NULL! | 3      | 3      | 0      | 0      |
| 0 | 0 | #NULL! | 3      | 2      | 0      | 0      |
| 0 | 0 | #NULL! | 1      | 1      | 0      | 0      |
| 0 | 0 | #NULL! | 1      | 1      | 0      | 0      |
| 0 | 0 | #NULL! | 1      | 1      | 0      | 0      |
| 0 | 0 | #NULL! | 3      | 1      | 0      | 0      |
| 0 | 0 | #NULL! | 4      | 2      | 0      | 0      |
| 0 | 0 | #NULL! | 4      | 2      | 0      | 0      |
| 0 | 0 | #NULL! | 4      | 2      | 0      | 0      |
| 0 | 0 | #NULL! | #NULL! | #NULL! | #NULL! | #NULL! |
| 0 | 0 | #NULL! | 1      | 1      | 0      | 0      |
| 0 | 0 | #NULL! | 1      | 1      | 0      | 1      |
| 0 | 0 | #NULL! | 3      | 3      | 0      | 0      |
| 0 | 0 | #NULL! | 2      | 1      | 0      | 0      |





|   |   |   |   |   |   |    |   |
|---|---|---|---|---|---|----|---|
| 5 | 0 | 0 | 0 | 2 | 0 | 0  | 0 |
| 1 | 0 | 0 | 0 | 0 | 0 | 0  | 0 |
| 1 | 0 | 0 | 0 | 0 | 0 | 0  | 0 |
| 0 | 0 | 0 | 0 | 0 | 0 | 0  | 0 |
| 0 | 0 | 0 | 0 | 0 | 0 | 0  | 0 |
| 0 | 0 | 0 | 0 | 0 | 0 | 0  | 0 |
| 3 | 2 | 1 | 0 | 0 | 0 | 2  | 7 |
| 1 | 0 | 0 | 0 | 0 | 0 | 0  | 0 |
| 0 | 0 | 0 | 0 | 0 | 0 | 0  | 0 |
| 0 | 0 | 0 | 0 | 0 | 0 | 0  | 0 |
| 0 | 0 | 0 | 0 | 0 | 0 | 0  | 0 |
| 2 | 4 | 0 | 0 | 0 | 0 | 0  | 0 |
| 1 | 1 | 0 | 0 | 0 | 0 | 0  | 0 |
| 0 | 0 | 0 | 0 | 0 | 0 | 0  | 1 |
| 1 | 1 | 0 | 0 | 0 | 0 | 0  | 0 |
| 5 | 5 | 5 | 5 | 5 | 0 | 1  | 0 |
| 1 | 0 | 0 | 1 | 0 | 0 | 0  | 0 |
| 1 | 0 | 0 | 0 | 0 | 0 | 0  | 0 |
| 2 | 4 | 0 | 0 | 0 | 0 | 99 | 6 |
| 0 | 0 | 0 | 0 | 0 | 0 | 0  | 0 |
| 0 | 0 | 0 | 0 | 0 | 0 | 0  | 0 |
| 0 | 0 | 0 | 0 | 0 | 0 | 0  | 0 |
| 0 | 0 | 0 | 0 | 0 | 0 | 0  | 0 |
| 0 | 0 | 0 | 0 | 0 | 0 | 0  | 0 |
| 0 | 0 | 0 | 0 | 0 | 5 | 0  | 7 |
| 1 | 2 | 1 | 0 | 5 | 0 | 2  | 1 |
| 5 | 5 | 5 | 5 | 5 | 0 | 0  | 0 |
| 0 | 0 | 0 | 0 | 0 | 0 | 0  | 0 |
| 0 | 0 | 0 | 0 | 0 | 0 | 0  | 0 |
| 1 | 0 | 0 | 0 | 0 | 0 | 0  | 0 |
| 0 | 0 | 0 | 0 | 0 | 0 | 0  | 0 |
| 2 | 0 | 0 | 0 | 0 | 0 | 0  | 0 |
| 1 | 0 | 0 | 0 | 0 | 0 | 0  | 0 |
| 0 | 0 | 0 | 1 | 0 | 0 | 0  | 0 |
| 3 | 0 | 0 | 1 | 0 | 0 | 2  | 0 |
| 0 | 0 | 0 | 0 | 1 | 0 | 0  | 0 |
| 2 | 0 | 0 | 0 | 0 | 0 | 0  | 0 |
| 0 | 0 | 0 | 0 | 0 | 0 | 0  | 0 |
| 2 | 0 | 0 | 0 | 0 | 0 | 0  | 0 |
| 5 | 5 | 0 | 5 | 0 | 0 | 1  | 1 |
| 3 | 3 | 0 | 0 | 0 | 0 | 0  | 0 |
| 0 | 0 | 0 | 0 | 0 | 0 | 0  | 0 |
| 0 | 0 | 0 | 0 | 0 | 0 | 0  | 0 |
| 0 | 0 | 0 | 0 | 0 | 0 | 0  | 0 |
| 4 | 0 | 0 | 0 | 0 | 0 | 0  | 0 |

|   |   |   |   |   |   |    |   |
|---|---|---|---|---|---|----|---|
| 0 | 0 | 0 | 0 | 0 | 0 | 0  | 0 |
| 5 | 3 | 0 | 0 | 0 | 0 | 0  | 0 |
| 2 | 1 | 0 | 0 | 0 | 0 | 0  | 0 |
| 0 | 0 | 0 | 0 | 0 | 0 | 1  | 0 |
| 0 | 0 | 0 | 0 | 0 | 0 | 0  | 0 |
| 1 | 0 | 0 | 0 | 0 | 0 | 0  | 0 |
| 2 | 4 | 4 | 2 | 1 | 0 | 0  | 0 |
| 2 | 0 | 0 | 0 | 0 | 0 | 0  | 0 |
| 1 | 0 | 0 | 0 | 0 | 0 | 1  | 1 |
| 2 | 0 | 0 | 0 | 0 | 0 | 0  | 0 |
| 1 | 1 | 0 | 0 | 0 | 0 | 1  | 1 |
| 2 | 0 | 1 | 0 | 0 | 0 | 99 | 0 |
| 0 | 0 | 0 | 2 | 0 | 0 | 0  | 0 |
| 0 | 0 | 0 | 0 | 0 | 0 | 0  | 0 |
| 1 | 0 | 0 | 0 | 0 | 0 | 0  | 0 |
| 5 | 4 | 5 | 0 | 0 | 0 | 1  | 1 |
| 0 | 0 | 0 | 0 | 0 | 0 | 0  | 0 |
| 0 | 0 | 0 | 2 | 2 | 0 | 0  | 0 |
| 0 | 0 | 0 | 0 | 0 | 0 | 0  | 0 |
| 0 | 0 | 0 | 0 | 0 | 0 | 0  | 0 |
| 2 | 0 | 0 | 0 | 1 | 0 | 0  | 0 |
| 1 | 0 | 0 | 0 | 0 | 0 | 0  | 0 |
| 0 | 0 | 0 | 0 | 0 | 0 | 1  | 1 |
| 0 | 0 | 0 | 0 | 0 | 0 | 0  | 0 |
| 0 | 0 | 0 | 0 | 0 | 0 | 0  | 0 |
| 1 | 5 | 5 | 1 | 1 | 0 | 1  | 6 |
| 0 | 0 | 0 | 0 | 0 | 0 | 2  | 0 |
| 0 | 0 | 0 | 0 | 0 | 0 | 0  | 0 |
| 3 | 0 | 0 | 0 | 0 | 0 | 0  | 0 |
| 0 | 0 | 0 | 0 | 0 | 0 | 0  | 0 |
| 0 | 0 | 0 | 0 | 0 | 0 | 0  | 0 |
| 0 | 0 | 0 | 0 | 0 | 0 | 0  | 0 |
| 0 | 0 | 0 | 0 | 0 | 0 | 0  | 0 |
| 0 | 0 | 0 | 0 | 0 | 0 | 0  | 0 |
| 0 | 0 | 0 | 0 | 0 | 0 | 0  | 0 |
| 0 | 0 | 0 | 0 | 0 | 0 | 0  | 0 |
| 0 | 0 | 0 | 0 | 0 | 0 | 0  | 0 |
| 0 | 0 | 0 | 0 | 0 | 0 | 0  | 0 |
| 0 | 0 | 0 | 0 | 0 | 0 | 0  | 0 |
| 0 | 0 | 0 | 0 | 0 | 0 | 0  | 0 |
| 1 | 0 | 0 | 0 | 2 | 0 | 0  | 0 |
| 0 | 0 | 0 | 0 | 0 | 0 | 0  | 0 |
| 0 | 0 | 0 | 0 | 0 | 0 | 0  | 0 |
| 1 | 0 | 0 | 0 | 0 | 0 | 0  | 0 |
| 1 | 0 | 0 | 0 | 0 | 0 | 0  | 0 |
| 1 | 0 | 0 | 0 | 0 | 0 | 0  | 0 |
| 0 | 0 | 0 | 0 | 0 | 0 | 0  | 0 |
| 0 | 0 | 0 | 0 | 0 | 0 | 0  | 0 |
| 0 | 0 | 0 | 0 | 0 | 0 | 0  | 0 |
| 1 | 0 | 0 | 5 | 5 | 0 | 0  | 0 |
| 1 | 0 | 0 | 0 | 0 | 0 | 0  | 0 |

|   |   |    |   |   |   |   |    |
|---|---|----|---|---|---|---|----|
| 0 | 0 | 0  | 0 | 0 | 0 | 0 | 0  |
| 1 | 0 | 0  | 0 | 0 | 0 | 0 | 0  |
| 0 | 0 | 0  | 0 | 0 | 0 | 0 | 0  |
| 1 | 0 | 0  | 4 | 0 | 0 | 0 | 0  |
| 1 | 2 | 0  | 0 | 0 | 0 | 2 | 7  |
| 0 | 0 | 0  | 0 | 0 | 0 | 0 | 0  |
| 0 | 0 | 0  | 0 | 0 | 0 | 0 | 6  |
| 0 | 0 | 0  | 0 | 0 | 0 | 0 | 0  |
| 0 | 0 | 0  | 0 | 0 | 0 | 0 | 0  |
| 1 | 0 | 0  | 0 | 0 | 0 | 0 | 0  |
| 1 | 0 | 0  | 0 | 0 | 0 | 0 | 0  |
| 0 | 0 | 0  | 0 | 0 | 0 | 0 | 0  |
| 0 | 0 | 0  | 0 | 0 | 0 | 0 | 0  |
| 0 | 0 | 0  | 0 | 0 | 0 | 0 | 7  |
| 0 | 0 | 0  | 0 | 0 | 0 | 0 | 0  |
| 0 | 0 | 0  | 0 | 0 | 0 | 0 | 0  |
| 0 | 0 | 0  | 0 | 0 | 0 | 0 | 0  |
| 0 | 0 | 0  | 0 | 0 | 0 | 2 | 0  |
| 0 | 0 | 0  | 0 | 0 | 0 | 0 | 0  |
| 0 | 0 | 0  | 0 | 0 | 0 | 0 | 0  |
| 0 | 0 | 0  | 0 | 0 | 0 | 0 | 0  |
| 0 | 0 | 99 | 0 | 1 | 0 | 2 | 0  |
| 0 | 0 | 0  | 0 | 0 | 0 | 0 | 0  |
| 0 | 0 | 0  | 0 | 0 | 0 | 0 | 0  |
| 0 | 0 | 0  | 0 | 0 | 0 | 0 | 0  |
| 0 | 0 | 0  | 0 | 0 | 0 | 0 | 0  |
| 0 | 0 | 0  | 0 | 0 | 0 | 0 | 0  |
| 0 | 0 | 0  | 0 | 0 | 0 | 0 | 0  |
| 0 | 0 | 0  | 0 | 0 | 0 | 0 | 0  |
| 0 | 0 | 0  | 0 | 0 | 0 | 0 | 0  |
| 0 | 0 | 0  | 0 | 0 | 0 | 0 | 0  |
| 0 | 0 | 0  | 0 | 0 | 0 | 0 | 0  |
| 0 | 0 | 0  | 0 | 0 | 0 | 0 | 0  |
| 0 | 0 | 0  | 0 | 0 | 0 | 0 | 0  |
| 0 | 0 | 0  | 0 | 0 | 0 | 0 | 0  |
| 0 | 0 | 0  | 0 | 0 | 0 | 0 | 0  |
| 0 | 0 | 0  | 0 | 0 | 0 | 0 | 0  |
| 0 | 0 | 0  | 0 | 0 | 0 | 1 | 1  |
| 0 | 0 | 0  | 0 | 0 | 0 | 0 | 0  |
| 0 | 0 | 0  | 0 | 0 | 0 | 0 | 0  |
| 0 | 0 | 0  | 0 | 0 | 0 | 0 | 0  |
| 0 | 0 | 0  | 0 | 0 | 0 | 0 | 0  |
| 0 | 0 | 0  | 0 | 0 | 0 | 0 | 0  |
| 0 | 0 | 0  | 0 | 0 | 0 | 0 | 0  |
| 0 | 0 | 0  | 0 | 0 | 0 | 0 | 0  |
| 0 | 0 | 0  | 0 | 0 | 0 | 0 | 99 |
| 0 | 0 | 0  | 0 | 0 | 0 | 0 | 0  |
| 0 | 0 | 0  | 0 | 0 | 0 | 0 | 0  |
| 0 | 0 | 0  | 0 | 0 | 0 | 0 | 0  |
| 0 | 0 | 0  | 0 | 0 | 0 | 0 | 0  |
| 0 | 0 | 0  | 0 | 0 | 0 | 0 | 0  |

|   |    |    |   |   |   |   |    |
|---|----|----|---|---|---|---|----|
| 0 | 0  | 0  | 0 | 0 | 0 | 0 | 0  |
| 0 | 0  | 0  | 0 | 0 | 0 | 0 | 0  |
| 0 | 0  | 0  | 0 | 0 | 0 | 2 | 7  |
| 2 | 0  | 0  | 0 | 0 | 0 | 2 | 7  |
| 2 | 0  | 0  | 0 | 0 | 0 | 0 | 0  |
| 0 | 0  | 0  | 0 | 0 | 0 | 0 | 0  |
| 1 | 5  | 0  | 0 | 0 | 0 | 0 | 0  |
| 1 | 2  | 0  | 0 | 0 | 0 | 0 | 0  |
| 0 | 0  | 0  | 0 | 0 | 0 | 0 | 0  |
| 0 | 0  | 0  | 0 | 0 | 0 | 0 | 0  |
| 1 | 0  | 0  | 0 | 0 | 0 | 0 | 0  |
| 2 | 0  | 0  | 0 | 0 | 0 | 0 | 0  |
| 0 | 0  | 0  | 0 | 0 | 0 | 0 | 0  |
| 1 | 0  | 0  | 0 | 1 | 0 | 1 | 1  |
| 1 | 0  | 0  | 0 | 0 | 0 | 0 | 0  |
| 1 | 0  | 0  | 0 | 0 | 0 | 0 | 0  |
| 0 | 0  | 0  | 0 | 0 | 0 | 0 | 0  |
| 3 | 1  | 0  | 1 | 1 | 0 | 0 | 0  |
| 2 | 0  | 0  | 0 | 0 | 0 | 0 | 0  |
| 5 | 0  | 0  | 0 | 0 | 0 | 0 | 0  |
| 2 | 0  | 0  | 0 | 0 | 0 | 0 | 0  |
| 0 | 0  | 0  | 0 | 0 | 0 | 0 | 0  |
| 0 | 0  | 0  | 0 | 0 | 0 | 2 | 7  |
| 0 | 0  | 0  | 0 | 0 | 0 | 0 | 0  |
| 5 | 5  | 0  | 0 | 0 | 0 | 0 | 0  |
| 2 | 0  | 0  | 0 | 0 | 0 | 0 | 0  |
| 1 | 0  | 0  | 0 | 0 | 0 | 0 | 0  |
| 1 | 0  | 0  | 0 | 1 | 0 | 0 | 0  |
| 5 | 4  | 3  | 0 | 0 | 0 | 0 | 0  |
| 1 | 0  | 0  | 0 | 0 | 0 | 0 | 0  |
| 0 | 0  | 0  | 0 | 0 | 0 | 0 | 0  |
| 1 | 0  | 0  | 0 | 0 | 0 | 2 | 7  |
| 2 | 1  | 0  | 0 | 0 | 0 | 0 | 0  |
| 0 | 0  | 0  | 0 | 0 | 0 | 0 | 0  |
| 2 | 1  | 0  | 1 | 0 | 0 | 0 | 99 |
| 1 | 0  | 0  | 0 | 0 | 0 | 0 | 0  |
| 1 | 0  | 0  | 0 | 0 | 0 | 0 | 0  |
| 0 | 0  | 0  | 0 | 0 | 0 | 0 | 0  |
| 1 | 0  | 0  | 0 | 0 | 0 | 0 | 0  |
| 0 | 0  | 0  | 0 | 0 | 0 | 0 | 0  |
| 0 | 1  | 0  | 0 | 0 | 0 | 0 | 0  |
| 2 | 0  | 0  | 0 | 2 | 0 | 1 | 1  |
| 0 | 0  | 0  | 0 | 0 | 0 | 0 | 0  |
| 0 | 0  | 0  | 0 | 0 | 0 | 0 | 0  |
| 0 | 0  | 0  | 0 | 0 | 0 | 0 | 0  |
| 0 | 0  | 0  | 0 | 0 | 0 | 0 | 0  |
| 0 | 0  | 0  | 0 | 0 | 0 | 0 | 0  |
| 0 | 0  | 0  | 0 | 0 | 0 | 0 | 0  |
| 0 | 99 | 99 | 0 | 1 | 0 | 2 | 0  |



|   |    |    |   |   |   |    |   |
|---|----|----|---|---|---|----|---|
| 0 | 0  | 0  | 0 | 0 | 0 | 0  | 0 |
| 0 | 0  | 0  | 0 | 0 | 0 | 0  | 0 |
| 0 | 0  | 0  | 0 | 0 | 0 | 0  | 0 |
| 0 | 0  | 99 | 0 | 0 | 0 | 99 | 0 |
| 0 | 0  | 0  | 0 | 0 | 0 | 0  | 0 |
| 0 | 0  | 0  | 0 | 0 | 0 | 0  | 0 |
| 1 | 0  | 0  | 0 | 0 | 0 | 0  | 0 |
| 0 | 0  | 0  | 0 | 0 | 0 | 0  | 0 |
| 2 | 5  | 0  | 0 | 0 | 0 | 0  | 0 |
| 3 | 99 | 99 | 0 | 0 | 0 | 0  | 0 |
| 0 | 0  | 0  | 0 | 0 | 0 | 0  | 0 |
| 0 | 0  | 0  | 0 | 0 | 0 | 0  | 0 |
| 0 | 0  | 0  | 0 | 0 | 0 | 0  | 0 |
| 1 | 0  | 0  | 0 | 0 | 0 | 0  | 0 |
| 1 | 0  | 0  | 0 | 0 | 0 | 1  | 6 |
| 0 | 0  | 0  | 0 | 0 | 0 | 0  | 0 |
| 4 | 0  | 0  | 0 | 2 | 0 | 0  | 0 |
| 2 | 0  | 0  | 0 | 0 | 0 | 0  | 0 |
| 1 | 0  | 0  | 0 | 0 | 0 | 0  | 0 |
| 0 | 0  | 0  | 0 | 0 | 0 | 0  | 0 |
| 0 | 0  | 0  | 0 | 0 | 0 | 0  | 0 |
| 4 | 4  | 4  | 4 | 0 | 0 | 0  | 0 |
| 2 | 1  | 2  | 0 | 0 | 0 | 1  | 1 |
| 2 | 1  | 1  | 2 | 2 | 1 | 1  | 2 |
| 1 | 0  | 0  | 0 | 0 | 0 | 2  | 7 |
| 0 | 0  | 0  | 0 | 0 | 0 | 0  | 0 |
| 1 | 5  | 0  | 0 | 1 | 0 | 0  | 1 |
| 0 | 0  | 0  | 0 | 1 | 0 | 0  | 0 |
| 0 | 0  | 0  | 0 | 0 | 0 | 0  | 0 |
| 0 | 0  | 0  | 0 | 0 | 0 | 0  | 0 |
| 0 | 0  | 0  | 0 | 0 | 0 | 0  | 0 |
| 0 | 0  | 0  | 0 | 0 | 0 | 0  | 0 |
| 0 | 2  | 2  | 0 | 0 | 0 | 2  | 7 |
| 1 | 0  | 0  | 0 | 0 | 0 | 1  | 1 |
| 0 | 0  | 0  | 0 | 0 | 0 | 0  | 0 |
| 3 | 4  | 0  | 1 | 1 | 0 | 1  | 3 |
| 2 | 2  | 0  | 0 | 0 | 0 | 1  | 3 |
| 0 | 0  | 0  | 0 | 0 | 0 | 0  | 0 |
| 0 | 0  | 0  | 0 | 0 | 0 | 0  | 0 |
| 1 | 0  | 0  | 0 | 0 | 0 | 0  | 0 |
| 5 | 4  | 1  | 0 | 0 | 0 | 0  | 0 |
| 3 | 2  | 0  | 0 | 0 | 0 | 0  | 0 |
| 0 | 0  | 0  | 0 | 0 | 0 | 0  | 0 |
| 5 | 0  | 0  | 0 | 0 | 0 | 0  | 0 |
| 0 | 0  | 0  | 0 | 0 | 0 | 0  | 0 |
| 0 | 0  | 0  | 0 | 0 | 0 | 0  | 0 |
| 1 | 0  | 0  | 0 | 0 | 0 | 0  | 0 |
| 0 | 0  | 0  | 0 | 0 | 0 | 0  | 0 |

|   |    |   |    |   |   |   |    |
|---|----|---|----|---|---|---|----|
| 0 | 0  | 0 | 0  | 0 | 0 | 0 | 0  |
| 0 | 0  | 0 | 0  | 0 | 0 | 0 | 0  |
| 1 | 0  | 0 | 0  | 0 | 0 | 0 | 0  |
| 1 | 2  | 0 | 0  | 0 | 0 | 0 | 0  |
| 1 | 0  | 0 | 0  | 0 | 0 | 0 | 7  |
| 0 | 0  | 0 | 0  | 0 | 0 | 0 | 99 |
| 5 | 3  | 3 | 5  | 1 | 2 | 2 | 7  |
| 2 | 3  | 1 | 99 | 0 | 0 | 0 | 0  |
| 1 | 3  | 0 | 0  | 0 | 0 | 0 | 0  |
| 4 | 1  | 0 | 99 | 0 | 0 | 2 | 0  |
| 1 | 0  | 0 | 0  | 0 | 0 | 0 | 0  |
| 0 | 0  | 0 | 0  | 0 | 0 | 0 | 0  |
| 4 | 5  | 2 | 1  | 0 | 0 | 1 | 6  |
| 3 | 5  | 4 | 0  | 0 | 0 | 1 | 1  |
| 1 | 0  | 0 | 0  | 0 | 0 | 0 | 0  |
| 1 | 1  | 1 | 0  | 1 | 0 | 0 | 0  |
| 0 | 0  | 0 | 0  | 0 | 0 | 0 | 0  |
| 0 | 0  | 0 | 0  | 0 | 0 | 0 | 0  |
| 1 | 0  | 0 | 0  | 0 | 0 | 0 | 0  |
| 0 | 0  | 0 | 0  | 0 | 0 | 0 | 0  |
| 0 | 0  | 0 | 0  | 0 | 0 | 0 | 0  |
| 1 | 0  | 0 | 0  | 0 | 0 | 0 | 0  |
| 1 | 0  | 0 | 0  | 0 | 0 | 0 | 0  |
| 2 | 0  | 0 | 0  | 1 | 0 | 0 | 0  |
| 1 | 0  | 0 | 0  | 0 | 0 | 0 | 0  |
| 0 | 0  | 0 | 0  | 0 | 0 | 0 | 0  |
| 0 | 0  | 0 | 0  | 0 | 0 | 0 | 0  |
| 0 | 0  | 0 | 0  | 0 | 0 | 0 | 0  |
| 0 | 0  | 0 | 0  | 0 | 0 | 2 | 7  |
| 0 | 0  | 0 | 0  | 0 | 0 | 0 | 0  |
| 1 | 0  | 0 | 0  | 0 | 0 | 0 | 0  |
| 0 | 0  | 0 | 0  | 0 | 0 | 0 | 0  |
| 0 | 0  | 0 | 0  | 0 | 0 | 0 | 0  |
| 0 | 0  | 0 | 0  | 0 | 0 | 0 | 0  |
| 0 | 0  | 0 | 0  | 0 | 0 | 0 | 0  |
| 0 | 0  | 0 | 0  | 0 | 0 | 0 | 0  |
| 1 | 0  | 0 | 0  | 0 | 0 | 0 | 0  |
| 0 | 0  | 0 | 0  | 0 | 0 | 1 | 1  |
| 1 | 0  | 0 | 0  | 0 | 0 | 0 | 0  |
| 0 | 0  | 0 | 0  | 4 | 0 | 0 | 0  |
| 0 | 99 | 0 | 0  | 0 | 0 | 0 | 0  |
| 1 | 0  | 0 | 0  | 1 | 0 | 0 | 0  |
| 0 | 0  | 0 | 0  | 0 | 0 | 0 | 0  |
| 1 | 0  | 0 | 0  | 0 | 0 | 0 | 0  |
| 0 | 0  | 0 | 0  | 0 | 0 | 0 | 0  |
| 0 | 0  | 0 | 0  | 0 | 0 | 0 | 0  |
| 0 | 0  | 0 | 0  | 0 | 0 | 0 | 0  |
| 0 | 0  | 0 | 0  | 0 | 0 | 0 | 0  |

|   |   |    |   |   |   |   |    |
|---|---|----|---|---|---|---|----|
| 0 | 0 | 0  | 0 | 0 | 0 | 0 | 0  |
| 0 | 0 | 0  | 0 | 0 | 0 | 0 | 0  |
| 1 | 0 | 0  | 0 | 2 | 0 | 0 | 0  |
| 2 | 0 | 0  | 0 | 0 | 0 | 0 | 0  |
| 0 | 0 | 0  | 0 | 0 | 0 | 2 | 0  |
| 2 | 1 | 1  | 0 | 4 | 0 | 0 | 0  |
| 0 | 0 | 0  | 0 | 0 | 0 | 0 | 0  |
| 1 | 2 | 1  | 2 | 5 | 0 | 0 | 0  |
| 0 | 0 | 0  | 0 | 0 | 0 | 0 | 0  |
| 0 | 0 | 0  | 0 | 0 | 0 | 0 | 0  |
| 0 | 0 | 0  | 0 | 0 | 0 | 0 | 0  |
| 2 | 0 | 0  | 0 | 0 | 0 | 0 | 0  |
| 0 | 0 | 0  | 0 | 0 | 0 | 0 | 0  |
| 0 | 0 | 0  | 0 | 0 | 0 | 0 | 0  |
| 0 | 0 | 0  | 0 | 0 | 0 | 0 | 0  |
| 2 | 0 | 0  | 0 | 0 | 0 | 0 | 0  |
| 0 | 0 | 0  | 0 | 0 | 0 | 0 | 0  |
| 0 | 0 | 0  | 0 | 0 | 0 | 0 | 0  |
| 5 | 5 | 5  | 3 | 5 | 1 | 1 | 3  |
| 0 | 0 | 0  | 0 | 0 | 0 | 0 | 0  |
| 0 | 0 | 0  | 0 | 0 | 0 | 0 | 0  |
| 0 | 0 | 0  | 0 | 0 | 0 | 0 | 0  |
| 0 | 0 | 0  | 0 | 0 | 0 | 0 | 0  |
| 0 | 0 | 99 | 1 | 0 | 0 | 0 | 0  |
| 1 | 5 | 4  | 1 | 0 | 0 | 0 | 1  |
| 0 | 0 | 0  | 0 | 0 | 0 | 2 | 0  |
| 2 | 0 | 0  | 0 | 0 | 0 | 0 | 7  |
| 2 | 0 | 1  | 0 | 0 | 0 | 0 | 0  |
| 2 | 0 | 0  | 0 | 0 | 0 | 0 | 0  |
| 0 | 0 | 0  | 0 | 0 | 0 | 0 | 0  |
| 0 | 0 | 0  | 0 | 0 | 0 | 2 | 7  |
| 0 | 0 | 0  | 0 | 0 | 0 | 2 | 0  |
| 1 | 0 | 0  | 0 | 0 | 0 | 0 | 0  |
| 0 | 0 | 0  | 0 | 0 | 0 | 0 | 0  |
| 0 | 0 | 0  | 0 | 0 | 0 | 0 | 7  |
| 0 | 0 | 0  | 0 | 0 | 0 | 0 | 0  |
| 0 | 0 | 0  | 0 | 0 | 0 | 0 | 0  |
| 0 | 0 | 0  | 0 | 0 | 0 | 0 | 0  |
| 0 | 0 | 0  | 0 | 0 | 0 | 0 | 0  |
| 0 | 0 | 0  | 0 | 0 | 0 | 1 | 99 |
| 1 | 0 | 0  | 0 | 1 | 0 | 0 | 0  |
| 0 | 0 | 0  | 0 | 0 | 0 | 0 | 0  |
| 0 | 0 | 0  | 0 | 0 | 0 | 0 | 0  |
| 0 | 0 | 0  | 0 | 0 | 0 | 0 | 0  |
| 1 | 0 | 0  | 0 | 0 | 0 | 0 | 0  |
| 3 | 2 | 1  | 2 | 0 | 0 | 1 | 6  |
| 2 | 0 | 0  | 0 | 3 | 0 | 0 | 0  |
| 0 | 1 | 0  | 0 | 0 | 0 | 0 | 0  |
| 0 | 0 | 0  | 0 | 1 | 0 | 0 | 0  |
| 0 | 0 | 0  | 0 | 0 | 0 | 0 | 0  |
| 1 | 2 | 0  | 0 | 0 | 0 | 0 | 0  |



|   |   |   |   |   |   |   |   |
|---|---|---|---|---|---|---|---|
| 1 | 0 | 0 | 0 | 0 | 0 | 0 | 0 |
| 1 | 0 | 0 | 0 | 1 | 0 | 0 | 0 |
| 0 | 0 | 0 | 0 | 0 | 0 | 0 | 0 |
| 0 | 0 | 0 | 0 | 0 | 0 | 0 | 0 |
| 0 | 0 | 0 | 0 | 0 | 0 | 0 | 0 |
| 2 | 0 | 0 | 0 | 2 | 0 | 0 | 0 |
| 2 | 4 | 1 | 0 | 0 | 0 | 0 | 0 |
| 2 | 0 | 0 | 0 | 0 | 0 | 0 | 0 |
| 3 | 2 | 1 | 1 | 0 | 0 | 1 | 1 |
| 3 | 0 | 0 | 0 | 0 | 0 | 0 | 0 |
| 0 | 1 | 1 | 0 | 0 | 0 | 1 | 0 |
| 4 | 3 | 3 | 1 | 0 | 0 | 0 | 0 |
| 0 | 5 | 0 | 0 | 0 | 0 | 0 | 0 |
| 4 | 0 | 0 | 0 | 1 | 0 | 0 | 0 |
| 1 | 0 | 0 | 0 | 0 | 0 | 0 | 0 |
| 1 | 2 | 2 | 0 | 0 | 0 | 0 | 0 |
| 0 | 0 | 0 | 0 | 0 | 0 | 0 | 0 |
| 0 | 0 | 0 | 0 | 0 | 0 | 0 | 0 |
| 0 | 0 | 0 | 0 | 0 | 0 | 0 | 0 |
| 0 | 0 | 0 | 0 | 0 | 0 | 0 | 0 |
| 0 | 0 | 0 | 0 | 0 | 0 | 0 | 0 |
| 4 | 4 | 3 | 1 | 0 | 0 | 0 | 0 |
| 1 | 3 | 1 | 0 | 0 | 0 | 0 | 0 |
| 3 | 2 | 2 | 1 | 1 | 0 | 1 | 2 |
| 4 | 4 | 4 | 0 | 1 | 0 | 0 | 0 |
| 0 | 0 | 0 | 0 | 0 | 0 | 0 | 0 |
| 5 | 5 | 0 | 0 | 0 | 0 | 2 | 7 |
| 0 | 0 | 0 | 0 | 0 | 0 | 0 | 0 |
| 0 | 0 | 0 | 0 | 0 | 0 | 0 | 0 |
| 5 | 5 | 5 | 0 | 0 | 0 | 1 | 2 |
| 0 | 0 | 0 | 0 | 0 | 0 | 0 | 0 |
| 3 | 5 | 3 | 0 | 0 | 0 | 2 | 7 |
| 1 | 0 | 0 | 0 | 0 | 0 | 0 | 0 |
| 1 | 5 | 0 | 0 | 0 | 0 | 0 | 0 |
| 2 | 0 | 0 | 0 | 0 | 0 | 0 | 0 |
| 1 | 0 | 0 | 0 | 0 | 0 | 0 | 0 |
| 2 | 0 | 0 | 0 | 0 | 0 | 0 | 0 |
| 2 | 0 | 0 | 0 | 0 | 0 | 0 | 0 |
| 0 | 0 | 0 | 0 | 0 | 0 | 0 | 0 |
| 0 | 0 | 0 | 0 | 0 | 0 | 0 | 0 |
| 0 | 0 | 0 | 0 | 0 | 0 | 0 | 0 |
| 0 | 0 | 0 | 0 | 0 | 0 | 0 | 0 |
| 0 | 0 | 0 | 0 | 0 | 0 | 0 | 0 |
| 0 | 0 | 0 | 0 | 0 | 0 | 0 | 0 |
| 0 | 0 | 0 | 0 | 0 | 0 | 2 | 7 |
| 0 | 0 | 0 | 0 | 0 | 0 | 0 | 7 |
| 0 | 0 | 0 | 0 | 0 | 0 | 1 | 1 |
| 2 | 0 | 0 | 0 | 0 | 0 | 0 | 0 |
| 1 | 0 | 0 | 0 | 0 | 0 | 0 | 0 |

|    |    |    |    |    |    |    |    |
|----|----|----|----|----|----|----|----|
| 0  | 0  | 0  | 0  | 0  | 0  | 0  | 0  |
| 0  | 0  | 0  | 0  | 0  | 0  | 0  | 0  |
| 1  | 0  | 0  | 0  | 0  | 0  | 0  | 0  |
| 0  | 0  | 0  | 0  | 0  | 0  | 0  | 0  |
| 2  | 5  | 5  | 3  | 2  | 0  | 2  | 7  |
| 0  | 0  | 0  | 0  | 0  | 0  | 0  | 0  |
| 0  | 0  | 0  | 0  | 0  | 0  | 2  | 7  |
| 2  | 0  | 0  | 0  | 4  | 0  | 0  | 0  |
| 1  | 0  | 0  | 1  | 0  | 0  | 1  | 2  |
| 2  | 2  | 2  | 2  | 2  | 2  | 1  | 1  |
| 0  | 0  | 0  | 0  | 0  | 0  | 0  | 0  |
| 0  | 0  | 0  | 0  | 0  | 0  | 0  | 7  |
| 0  | 0  | 0  | 0  | 0  | 0  | 0  | 0  |
| 1  | 0  | 0  | 0  | 2  | 0  | 0  | 0  |
| 0  | 0  | 0  | 0  | 0  | 0  | 0  | 0  |
| 0  | 0  | 0  | 0  | 0  | 0  | 0  | 0  |
| 0  | 0  | 0  | 0  | 0  | 0  | 0  | 0  |
| 0  | 0  | 0  | 0  | 0  | 0  | 0  | 0  |
| 0  | 0  | 0  | 0  | 0  | 0  | 0  | 0  |
| 0  | 0  | 0  | 0  | 0  | 0  | 0  | 0  |
| 0  | 0  | 0  | 0  | 0  | 0  | 0  | 0  |
| 1  | 0  | 0  | 0  | 0  | 0  | 1  | 1  |
| 1  | 0  | 0  | 0  | 0  | 0  | 0  | 0  |
| 0  | 0  | 0  | 0  | 0  | 0  | 0  | 0  |
| 2  | 0  | 1  | 0  | 0  | 0  | 0  | 0  |
| 99 | 99 | 99 | 99 | 99 | 99 | 99 | 99 |
| 2  | 0  | 0  | 0  | 0  | 0  | 0  | 0  |
| 1  | 0  | 0  | 0  | 1  | 0  | 0  | 0  |
| 1  | 0  | 0  | 0  | 0  | 0  | 0  | 0  |
| 0  | 0  | 0  | 0  | 0  | 0  | 0  | 0  |
| 0  | 0  | 0  | 0  | 0  | 0  | 2  | 0  |
| 2  | 1  | 1  | 2  | 0  | 0  | 0  | 0  |
| 0  | 0  | 0  | 0  | 0  | 0  | 0  | 0  |
| 0  | 0  | 0  | 0  | 0  | 0  | 0  | 0  |
| 0  | 0  | 0  | 0  | 0  | 0  | 0  | 0  |
| 0  | 0  | 0  | 0  | 0  | 0  | 0  | 0  |
| 5  | 0  | 0  | 1  | 1  | 0  | 0  | 0  |
| 0  | 0  | 0  | 0  | 0  | 0  | 0  | 0  |
| 0  | 0  | 0  | 0  | 0  | 0  | 0  | 0  |
| 0  | 0  | 0  | 0  | 0  | 0  | 0  | 0  |
| 2  | 0  | 0  | 0  | 0  | 0  | 0  | 0  |
| 1  | 0  | 0  | 0  | 0  | 0  | 0  | 0  |
| 0  | 0  | 0  | 0  | 0  | 0  | 2  | 7  |
| 0  | 0  | 0  | 0  | 0  | 0  | 0  | 0  |
| 0  | 0  | 0  | 0  | 0  | 0  | 0  | 0  |
| 1  | 0  | 0  | 0  | 0  | 0  | 0  | 0  |
| 0  | 0  | 0  | 0  | 0  | 0  | 0  | 0  |
| 0  | 0  | 0  | 0  | 0  | 0  | 1  | 0  |
| 0  | 0  | 0  | 0  | 0  | 0  | 0  | 0  |

|    |    |    |   |    |   |    |    |
|----|----|----|---|----|---|----|----|
| 0  | 0  | 0  | 0 | 0  | 0 | 0  | 0  |
| 2  | 0  | 0  | 0 | 1  | 0 | 0  | 0  |
| 2  | 99 | 99 | 0 | 99 | 0 | 99 | 99 |
| 1  | 1  | 0  | 0 | 0  | 0 | 0  | 0  |
| 2  | 0  | 0  | 0 | 0  | 0 | 0  | 0  |
| 0  | 0  | 0  | 0 | 0  | 0 | 0  | 0  |
| 0  | 0  | 0  | 0 | 0  | 0 | 0  | 0  |
| 1  | 0  | 0  | 0 | 0  | 0 | 0  | 0  |
| 1  | 0  | 0  | 0 | 0  | 0 | 0  | 0  |
| 0  | 0  | 0  | 0 | 0  | 0 | 2  | 7  |
| 0  | 0  | 0  | 0 | 0  | 0 | 0  | 0  |
| 0  | 0  | 0  | 0 | 0  | 0 | 0  | 0  |
| 0  | 0  | 0  | 0 | 0  | 0 | 0  | 0  |
| 1  | 2  | 2  | 0 | 0  | 0 | 0  | 0  |
| 0  | 0  | 0  | 1 | 0  | 0 | 0  | 0  |
| 0  | 0  | 0  | 0 | 0  | 0 | 0  | 0  |
| 0  | 0  | 0  | 0 | 0  | 0 | 0  | 0  |
| 0  | 0  | 0  | 0 | 0  | 0 | 0  | 0  |
| 1  | 0  | 0  | 0 | 0  | 0 | 0  | 0  |
| 1  | 0  | 0  | 1 | 0  | 0 | 0  | 0  |
| 0  | 0  | 0  | 0 | 0  | 0 | 0  | 0  |
| 0  | 0  | 0  | 0 | 0  | 0 | 0  | 0  |
| 0  | 0  | 0  | 0 | 0  | 0 | 0  | 0  |
| 4  | 3  | 4  | 3 | 2  | 0 | 2  | 7  |
| 4  | 5  | 3  | 1 | 0  | 0 | 0  | 0  |
| 99 | 0  | 0  | 0 | 0  | 0 | 0  | 0  |
| 0  | 0  | 0  | 0 | 0  | 0 | 0  | 0  |
| 1  | 1  | 0  | 0 | 0  | 0 | 0  | 0  |
| 1  | 0  | 0  | 0 | 0  | 0 | 0  | 0  |
| 0  | 0  | 0  | 0 | 0  | 0 | 0  | 0  |
| 0  | 0  | 99 | 0 | 0  | 0 | 0  | 0  |
| 5  | 5  | 0  | 0 | 0  | 0 | 1  | 7  |
| 1  | 0  | 0  | 1 | 0  | 0 | 0  | 0  |
| 2  | 2  | 2  | 1 | 0  | 0 | 1  | 1  |
| 0  | 0  | 0  | 0 | 0  | 0 | 0  | 0  |
| 1  | 0  | 0  | 0 | 0  | 0 | 0  | 0  |
| 0  | 0  | 0  | 0 | 0  | 0 | 0  | 0  |
| 0  | 0  | 0  | 0 | 0  | 0 | 0  | 0  |
| 0  | 0  | 0  | 0 | 0  | 0 | 0  | 0  |
| 2  | 0  | 0  | 0 | 0  | 0 | 0  | 0  |
| 0  | 0  | 0  | 0 | 0  | 0 | 0  | 0  |
| 0  | 0  | 0  | 0 | 0  | 0 | 0  | 0  |
| 5  | 1  | 0  | 0 | 0  | 0 | 1  | 1  |
| 0  | 0  | 0  | 0 | 0  | 0 | 0  | 0  |
| 0  | 0  | 0  | 0 | 0  | 0 | 0  | 0  |
| 0  | 0  | 0  | 0 | 0  | 0 | 99 | 99 |
| 0  | 0  | 0  | 0 | 0  | 0 | 99 | 99 |
| 0  | 0  | 0  | 0 | 0  | 0 | 0  | 0  |

|    |    |    |    |    |    |    |    |
|----|----|----|----|----|----|----|----|
| 1  | 3  | 0  | 0  | 0  | 0  | 0  | 0  |
| 0  | 0  | 0  | 0  | 0  | 0  | 0  | 0  |
| 3  | 2  | 0  | 0  | 0  | 0  | 0  | 0  |
| 4  | 0  | 0  | 0  | 0  | 0  | 1  | 1  |
| 0  | 0  | 0  | 0  | 0  | 0  | 0  | 0  |
| 0  | 0  | 0  | 0  | 0  | 0  | 0  | 0  |
| 2  | 0  | 0  | 0  | 0  | 0  | 0  | 0  |
| 0  | 0  | 0  | 0  | 0  | 0  | 0  | 0  |
| 0  | 0  | 0  | 0  | 0  | 0  | 0  | 0  |
| 0  | 0  | 0  | 0  | 0  | 0  | 0  | 0  |
| 1  | 5  | 0  | 1  | 0  | 0  | 1  | 3  |
| 0  | 0  | 0  | 0  | 0  | 0  | 0  | 7  |
| 0  | 0  | 0  | 0  | 0  | 0  | 0  | 0  |
| 0  | 0  | 0  | 0  | 0  | 0  | 0  | 0  |
| 0  | 0  | 0  | 0  | 0  | 0  | 2  | 7  |
| 0  | 0  | 0  | 0  | 0  | 0  | 0  | 0  |
| 0  | 0  | 0  | 0  | 0  | 0  | 0  | 0  |
| 0  | 0  | 0  | 0  | 0  | 0  | 2  | 7  |
| 0  | 0  | 0  | 0  | 0  | 0  | 0  | 0  |
| 0  | 0  | 0  | 0  | 0  | 0  | 2  | 7  |
| 0  | 0  | 0  | 0  | 0  | 0  | 0  | 0  |
| 0  | 0  | 0  | 0  | 0  | 0  | 0  | 0  |
| 1  | 0  | 0  | 0  | 0  | 0  | 0  | 0  |
| 0  | 0  | 0  | 0  | 0  | 0  | 0  | 0  |
| 0  | 0  | 0  | 0  | 0  | 0  | 0  | 0  |
| 0  | 0  | 0  | 0  | 0  | 0  | 0  | 0  |
| 0  | 0  | 0  | 0  | 0  | 0  | 99 | 0  |
| 0  | 0  | 0  | 0  | 0  | 0  | 0  | 0  |
| 99 | 99 | 99 | 99 | 99 | 99 | 99 | 99 |
| 0  | 0  | 0  | 0  | 0  | 0  | 0  | 7  |
| 0  | 0  | 0  | 0  | 0  | 0  | 0  | 0  |
| 0  | 0  | 0  | 0  | 0  | 0  | 99 | 0  |
| 0  | 0  | 0  | 0  | 0  | 0  | 0  | 0  |
| 1  | 0  | 0  | 0  | 0  | 0  | 0  | 0  |
| 1  | 0  | 0  | 0  | 0  | 0  | 99 | 7  |
| 1  | 0  | 0  | 0  | 0  | 0  | 0  | 0  |
| 0  | 0  | 0  | 0  | 0  | 0  | 0  | 0  |
| 0  | 0  | 0  | 0  | 0  | 0  | 0  | 0  |
| 0  | 0  | 0  | 0  | 0  | 0  | 0  | 0  |
| 0  | 0  | 0  | 0  | 0  | 0  | 0  | 0  |
| 0  | 0  | 0  | 0  | 0  | 0  | 0  | 0  |
| 0  | 0  | 0  | 0  | 0  | 0  | 0  | 0  |
| 4  | 0  | 0  | 0  | 0  | 0  | 0  | 0  |
| 0  | 0  | 0  | 0  | 0  | 0  | 0  | 0  |
| 0  | 0  | 0  | 0  | 0  | 0  | 0  | 0  |
| 0  | 0  | 0  | 0  | 0  | 0  | 0  | 0  |

|    |   |    |    |    |    |   |   |
|----|---|----|----|----|----|---|---|
| 0  | 0 | 0  | 0  | 0  | 0  | 2 | 7 |
| 1  | 0 | 0  | 0  | 0  | 0  | 0 | 0 |
| 0  | 0 | 0  | 0  | 0  | 0  | 0 | 0 |
| 0  | 0 | 0  | 0  | 0  | 0  | 1 | 3 |
| 0  | 0 | 0  | 0  | 0  | 0  | 0 | 0 |
| 0  | 0 | 0  | 0  | 0  | 0  | 0 | 0 |
| 0  | 0 | 0  | 0  | 0  | 0  | 0 | 0 |
| 0  | 0 | 0  | 0  | 0  | 0  | 0 | 0 |
| 0  | 0 | 0  | 0  | 0  | 0  | 0 | 0 |
| 0  | 0 | 0  | 0  | 0  | 0  | 2 | 7 |
| 0  | 0 | 0  | 0  | 0  | 0  | 0 | 0 |
| 0  | 0 | 0  | 0  | 0  | 0  | 0 | 0 |
| 0  | 0 | 0  | 0  | 0  | 0  | 0 | 0 |
| 0  | 0 | 0  | 0  | 0  | 0  | 0 | 0 |
| 1  | 0 | 0  | 0  | 0  | 0  | 0 | 0 |
| 0  | 0 | 0  | 0  | 0  | 0  | 2 | 7 |
| 0  | 0 | 0  | 0  | 0  | 0  | 0 | 0 |
| 1  | 0 | 0  | 0  | 0  | 0  | 0 | 0 |
| 2  | 2 | 0  | 0  | 1  | 0  | 0 | 0 |
| 1  | 0 | 0  | 2  | 2  | 0  | 1 | 1 |
| 2  | 2 | 0  | 0  | 1  | 0  | 0 | 0 |
| 2  | 0 | 0  | 0  | 0  | 0  | 0 | 0 |
| 0  | 0 | 0  | 0  | 0  | 0  | 0 | 0 |
| 2  | 0 | 0  | 0  | 0  | 0  | 0 | 0 |
| 0  | 0 | 0  | 0  | 0  | 0  | 0 | 0 |
| 0  | 0 | 0  | 0  | 1  | 0  | 0 | 0 |
| 0  | 0 | 0  | 0  | 0  | 0  | 0 | 0 |
| 0  | 0 | 0  | 0  | 0  | 0  | 0 | 0 |
| 0  | 0 | 0  | 1  | 1  | 0  | 0 | 0 |
| 99 | 0 | 99 | 99 | 99 | 99 | 0 | 0 |
| 0  | 0 | 0  | 0  | 0  | 0  | 0 | 0 |
| 5  | 0 | 0  | 1  | 0  | 0  | 0 | 0 |
| 0  | 0 | 0  | 0  | 0  | 0  | 0 | 0 |
| 0  | 0 | 0  | 0  | 0  | 0  | 0 | 0 |
| 0  | 0 | 0  | 0  | 0  | 0  | 0 | 0 |
| 0  | 0 | 0  | 0  | 0  | 0  | 0 | 0 |
| 0  | 0 | 0  | 0  | 0  | 0  | 0 | 0 |
| 0  | 0 | 0  | 0  | 0  | 0  | 0 | 0 |
| 1  | 0 | 0  | 0  | 0  | 0  | 0 | 0 |
| 5  | 1 | 1  | 2  | 1  | 0  | 1 | 1 |
| 0  | 0 | 0  | 0  | 0  | 0  | 0 | 0 |
| 1  | 0 | 0  | 0  | 0  | 0  | 0 | 0 |
| 0  | 0 | 0  | 0  | 0  | 0  | 0 | 0 |
| 1  | 0 | 0  | 0  | 0  | 0  | 0 | 0 |
| 0  | 0 | 0  | 0  | 0  | 0  | 0 | 0 |
| 0  | 0 | 0  | 0  | 0  | 0  | 0 | 0 |
| 1  | 0 | 0  | 0  | 0  | 0  | 0 | 0 |

|    |    |    |    |    |    |    |    |
|----|----|----|----|----|----|----|----|
| 0  | 0  | 0  | 0  | 0  | 0  | 0  | 0  |
| 0  | 0  | 0  | 0  | 0  | 0  | 0  | 0  |
| 0  | 0  | 0  | 0  | 0  | 0  | 99 | 99 |
| 0  | 0  | 0  | 0  | 0  | 0  | 0  | 0  |
| 0  | 0  | 0  | 0  | 0  | 0  | 0  | 0  |
| 1  | 0  | 0  | 1  | 1  | 0  | 0  | 0  |
| 0  | 0  | 0  | 0  | 1  | 0  | 0  | 0  |
| 1  | 2  | 0  | 0  | 0  | 0  | 0  | 0  |
| 99 | 99 | 99 | 99 | 99 | 99 | 99 | 99 |
| 0  | 0  | 0  | 0  | 0  | 0  | 0  | 0  |
| 5  | 5  | 5  | 0  | 0  | 0  | 2  | 7  |
| 2  | 4  | 1  | 0  | 0  | 0  | 0  | 0  |
| 1  | 0  | 0  | 0  | 0  | 0  | 0  | 0  |
| 2  | 1  | 1  | 0  | 0  | 0  | 2  | 7  |
| 0  | 0  | 0  | 0  | 0  | 0  | 0  | 0  |
| 0  | 0  | 0  | 0  | 0  | 0  | 0  | 0  |
| 1  | 0  | 0  | 0  | 0  | 0  | 0  | 0  |
| 5  | 0  | 0  | 4  | 0  | 0  | 2  | 7  |
| 2  | 0  | 0  | 1  | 3  | 0  | 0  | 0  |
| 1  | 0  | 0  | 0  | 0  | 0  | 0  | 0  |
| 1  | 0  | 0  | 0  | 0  | 0  | 0  | 0  |
| 1  | 0  | 0  | 0  | 0  | 0  | 0  | 0  |
| 0  | 0  | 0  | 0  | 0  | 0  | 0  | 0  |
| 0  | 0  | 0  | 0  | 0  | 0  | 0  | 0  |
| 0  | 0  | 0  | 0  | 0  | 0  | 0  | 0  |
| 0  | 0  | 0  | 0  | 0  | 0  | 0  | 0  |
| 1  | 0  | 0  | 0  | 0  | 0  | 0  | 0  |
| 0  | 0  | 0  | 0  | 0  | 0  | 0  | 0  |
| 0  | 0  | 0  | 0  | 0  | 0  | 0  | 0  |
| 0  | 0  | 0  | 0  | 0  | 0  | 0  | 0  |
| 0  | 0  | 0  | 0  | 0  | 0  | 0  | 0  |
| 0  | 0  | 0  | 0  | 0  | 0  | 0  | 0  |
| 0  | 0  | 0  | 0  | 0  | 0  | 0  | 0  |
| 0  | 0  | 0  | 0  | 0  | 0  | 0  | 0  |
| 0  | 0  | 0  | 0  | 0  | 0  | 0  | 0  |
| 0  | 0  | 0  | 0  | 0  | 0  | 0  | 0  |
| 0  | 0  | 0  | 0  | 0  | 0  | 0  | 0  |
| 0  | 0  | 0  | 0  | 0  | 0  | 0  | 0  |
| 0  | 0  | 0  | 0  | 0  | 0  | 0  | 0  |
| 0  | 0  | 0  | 0  | 0  | 0  | 0  | 0  |
| 1  | 0  | 0  | 0  | 0  | 0  | 0  | 0  |
| 0  | 0  | 0  | 0  | 0  | 0  | 0  | 0  |
| 99 | 0  | 0  | 99 | 99 | 0  | 0  | 99 |
| 1  | 0  | 0  | 0  | 0  | 0  | 0  | 0  |
| 0  | 0  | 0  | 0  | 0  | 0  | 0  | 0  |
| 0  | 0  | 0  | 0  | 0  | 0  | 99 | 99 |
| 0  | 0  | 0  | 0  | 0  | 0  | 2  | 7  |
| 0  | 0  | 0  | 0  | 0  | 0  | 0  | 0  |
| 1  | 0  | 0  | 0  | 1  | 0  | 0  | 0  |
| 1  | 0  | 0  | 0  | 0  | 0  | 0  | 0  |
| 1  | 0  | 0  | 0  | 0  | 0  | 0  | 0  |
| 0  | 0  | 0  | 0  | 0  | 0  | 0  | 0  |
| 1  | 0  | 0  | 0  | 3  | 0  | 0  | 0  |

|   |   |   |    |    |   |   |   |
|---|---|---|----|----|---|---|---|
| 0 | 0 | 0 | 0  | 0  | 0 | 0 | 0 |
| 0 | 0 | 0 | 0  | 0  | 0 | 0 | 0 |
| 0 | 0 | 0 | 0  | 0  | 0 | 0 | 0 |
| 0 | 0 | 0 | 0  | 0  | 0 | 0 | 0 |
| 0 | 0 | 0 | 0  | 0  | 0 | 2 | 7 |
| 0 | 0 | 0 | 0  | 0  | 0 | 0 | 0 |
| 1 | 0 | 0 | 0  | 0  | 0 | 0 | 0 |
| 0 | 0 | 0 | 0  | 0  | 0 | 0 | 0 |
| 0 | 0 | 0 | 0  | 0  | 0 | 0 | 0 |
| 0 | 0 | 0 | 0  | 0  | 0 | 0 | 0 |
| 0 | 0 | 0 | 0  | 0  | 0 | 0 | 0 |
| 0 | 0 | 0 | 0  | 0  | 0 | 0 | 0 |
| 0 | 0 | 0 | 0  | 0  | 0 | 0 | 0 |
| 0 | 0 | 0 | 0  | 0  | 0 | 0 | 0 |
| 1 | 0 | 0 | 0  | 0  | 0 | 0 | 0 |
| 1 | 0 | 0 | 0  | 99 | 0 | 0 | 0 |
| 0 | 0 | 0 | 99 | 0  | 0 | 0 | 0 |
| 1 | 0 | 0 | 1  | 0  | 0 | 0 | 0 |
| 0 | 0 | 0 | 0  | 0  | 0 | 0 | 0 |
| 0 | 0 | 0 | 0  | 0  | 0 | 0 | 0 |
| 1 | 0 | 0 | 0  | 0  | 0 | 0 | 0 |
| 0 | 0 | 0 | 0  | 0  | 0 | 0 | 0 |
| 1 | 0 | 0 | 0  | 0  | 0 | 0 | 0 |
| 2 | 1 | 0 | 0  | 1  | 0 | 0 | 0 |
| 0 | 0 | 0 | 0  | 0  | 0 | 0 | 0 |
| 3 | 1 | 0 | 0  | 0  | 0 | 0 | 0 |
| 0 | 0 | 0 | 0  | 0  | 0 | 0 | 0 |
| 5 | 3 | 1 | 3  | 1  | 0 | 0 | 0 |
| 0 | 0 | 0 | 0  | 0  | 0 | 0 | 0 |
| 0 | 0 | 0 | 0  | 0  | 0 | 0 | 0 |
| 0 | 0 | 0 | 0  | 0  | 0 | 0 | 0 |
| 0 | 0 | 0 | 0  | 0  | 0 | 0 | 0 |
| 0 | 0 | 0 | 0  | 0  | 0 | 0 | 0 |
| 0 | 0 | 0 | 0  | 0  | 0 | 0 | 0 |
| 0 | 0 | 0 | 0  | 0  | 0 | 0 | 0 |
| 0 | 0 | 0 | 0  | 0  | 0 | 0 | 0 |
| 0 | 0 | 0 | 0  | 0  | 0 | 0 | 0 |
| 3 | 0 | 0 | 1  | 0  | 0 | 2 | 0 |
| 0 | 0 | 0 | 0  | 0  | 0 | 2 | 7 |
| 0 | 0 | 0 | 0  | 0  | 0 | 0 | 0 |
| 1 | 0 | 0 | 0  | 0  | 0 | 0 | 0 |
| 1 | 0 | 0 | 0  | 0  | 0 | 0 | 0 |
| 0 | 0 | 0 | 0  | 0  | 0 | 0 | 0 |
| 0 | 0 | 0 | 0  | 0  | 0 | 0 | 0 |
| 0 | 0 | 0 | 0  | 1  | 0 | 0 | 0 |
| 3 | 0 | 0 | 0  | 1  | 0 | 0 | 0 |
| 1 | 0 | 0 | 0  | 0  | 0 | 0 | 0 |
| 1 | 0 | 0 | 0  | 0  | 0 | 0 | 0 |

|    |    |    |    |    |    |    |    |
|----|----|----|----|----|----|----|----|
| 0  | 0  | 0  | 0  | 0  | 0  | 0  | 0  |
| 0  | 0  | 0  | 0  | 0  | 0  | 0  | 0  |
| 0  | 0  | 0  | 0  | 0  | 0  | 0  | 0  |
| 0  | 0  | 0  | 0  | 0  | 0  | 0  | 0  |
| 1  | 0  | 0  | 0  | 0  | 0  | 0  | 0  |
| 1  | 0  | 0  | 0  | 0  | 0  | 0  | 0  |
| 0  | 0  | 0  | 0  | 0  | 0  | 0  | 0  |
| 0  | 0  | 0  | 0  | 0  | 0  | 0  | 0  |
| 0  | 0  | 0  | 0  | 0  | 0  | 0  | 0  |
| 3  | 0  | 0  | 1  | 1  | 0  | 0  | 0  |
| 1  | 0  | 0  | 0  | 0  | 0  | 0  | 0  |
| 1  | 0  | 0  | 0  | 0  | 0  | 0  | 0  |
| 99 | 99 | 99 | 99 | 99 | 99 | 99 | 99 |
| 1  | 0  | 0  | 0  | 1  | 0  | 0  | 0  |
| 0  | 0  | 0  | 0  | 0  | 0  | 0  | 0  |
| 0  | 0  | 0  | 1  | 0  | 0  | 0  | 0  |
| 1  | 0  | 0  | 0  | 0  | 0  | 0  | 0  |
| 1  | 0  | 0  | 0  | 0  | 0  | 0  | 0  |
| 1  | 1  | 0  | 0  | 1  | 0  | 0  | 0  |
| 2  | 0  | 0  | 0  | 0  | 0  | 0  | 0  |
| 0  | 0  | 0  | 0  | 0  | 0  | 0  | 0  |
| 1  | 1  | 0  | 0  | 0  | 0  | 0  | 0  |
| 1  | 0  | 0  | 0  | 2  | 0  | 0  | 0  |
| 5  | 3  | 0  | 0  | 0  | 0  | 0  | 0  |
| 0  | 0  | 0  | 0  | 0  | 0  | 0  | 0  |
| 1  | 0  | 0  | 0  | 0  | 0  | 0  | 99 |
| 3  | 4  | 0  | 0  | 0  | 0  | 1  | 1  |
| 0  | 0  | 0  | 0  | 0  | 0  | 0  | 0  |
| 0  | 0  | 0  | 0  | 0  | 0  | 0  | 1  |
| 0  | 0  | 0  | 0  | 0  | 0  | 0  | 0  |
| 1  | 1  | 0  | 1  | 0  | 0  | 2  | 1  |
| 0  | 0  | 0  | 0  | 0  | 0  | 0  | 0  |
| 1  | 0  | 0  | 0  | 0  | 0  | 0  | 0  |
| 2  | 0  | 0  | 1  | 2  | 0  | 0  | 0  |
| 1  | 0  | 0  | 0  | 0  | 0  | 0  | 0  |
| 0  | 0  | 0  | 0  | 0  | 0  | 0  | 0  |
| 1  | 0  | 99 | 0  | 2  | 0  | 0  | 0  |
| 1  | 0  | 0  | 0  | 0  | 0  | 0  | 0  |
| 0  | 0  | 0  | 0  | 0  | 0  | 0  | 0  |
| 0  | 0  | 0  | 0  | 0  | 0  | 0  | 0  |
| 0  | 0  | 0  | 0  | 0  | 0  | 0  | 0  |
| 0  | 0  | 0  | 0  | 0  | 0  | 0  | 0  |
| 0  | 0  | 0  | 0  | 0  | 0  | 0  | 0  |
| 0  | 0  | 0  | 0  | 0  | 0  | 0  | 0  |
| 0  | 0  | 0  | 0  | 0  | 0  | 0  | 0  |
| 0  | 0  | 0  | 0  | 0  | 0  | 0  | 0  |
| 0  | 0  | 0  | 0  | 0  | 0  | 0  | 0  |
| 0  | 99 | 99 | 0  | 0  | 0  | 2  | 7  |
| 0  | 0  | 0  | 0  | 0  | 0  | 0  | 0  |
| 0  | 0  | 0  | 0  | 0  | 0  | 0  | 0  |
| 0  | 0  | 0  | 0  | 0  | 0  | 0  | 0  |
| 0  | 0  | 0  | 0  | 0  | 0  | 2  | 0  |
| 0  | 0  | 0  | 0  | 0  | 0  | 0  | 0  |
| 0  | 0  | 0  | 0  | 0  | 0  | 0  | 0  |



|    |    |    |   |   |   |   |   |
|----|----|----|---|---|---|---|---|
| 0  | 0  | 0  | 0 | 0 | 0 | 0 | 0 |
| 1  | 0  | 0  | 0 | 0 | 0 | 0 | 0 |
| 0  | 0  | 0  | 0 | 0 | 0 | 0 | 7 |
| 0  | 0  | 0  | 0 | 0 | 0 | 0 | 0 |
| 0  | 0  | 0  | 0 | 0 | 0 | 0 | 0 |
| 1  | 0  | 0  | 0 | 0 | 0 | 2 | 7 |
| 0  | 0  | 0  | 0 | 0 | 0 | 0 | 0 |
| 99 | 0  | 0  | 0 | 0 | 0 | 0 | 0 |
| 0  | 0  | 0  | 0 | 0 | 0 | 0 | 0 |
| 0  | 0  | 0  | 0 | 0 | 0 | 0 | 0 |
| 0  | 0  | 0  | 0 | 0 | 0 | 0 | 0 |
| 0  | 0  | 0  | 0 | 0 | 0 | 0 | 0 |
| 0  | 0  | 0  | 0 | 0 | 0 | 0 | 0 |
| 0  | 0  | 0  | 0 | 0 | 0 | 0 | 0 |
| 0  | 0  | 0  | 0 | 0 | 0 | 0 | 0 |
| 0  | 0  | 0  | 0 | 0 | 0 | 0 | 0 |
| 0  | 0  | 0  | 0 | 0 | 0 | 0 | 0 |
| 0  | 0  | 0  | 0 | 0 | 0 | 0 | 0 |
| 0  | 0  | 0  | 0 | 0 | 0 | 0 | 0 |
| 5  | 1  | 0  | 0 | 5 | 0 | 1 | 2 |
| 0  | 99 | 99 | 0 | 1 | 0 | 2 | 7 |
| 1  | 0  | 0  | 0 | 1 | 0 | 0 | 0 |
| 4  | 2  | 2  | 0 | 5 | 0 | 1 | 1 |
| 3  | 1  | 0  | 0 | 0 | 0 | 0 | 0 |
| 1  | 0  | 0  | 0 | 1 | 0 | 0 | 0 |
| 1  | 0  | 0  | 0 | 0 | 0 | 0 | 0 |
| 3  | 0  | 0  | 0 | 0 | 0 | 0 | 0 |
| 0  | 0  | 0  | 0 | 0 | 0 | 0 | 0 |
| 0  | 0  | 0  | 0 | 0 | 0 | 0 | 0 |
| 0  | 0  | 0  | 0 | 0 | 0 | 0 | 0 |
| 0  | 0  | 0  | 0 | 0 | 0 | 0 | 0 |
| 0  | 0  | 0  | 0 | 0 | 0 | 0 | 0 |
| 0  | 0  | 0  | 0 | 0 | 0 | 0 | 0 |
| 0  | 0  | 0  | 0 | 0 | 0 | 0 | 0 |
| 0  | 0  | 0  | 0 | 0 | 0 | 0 | 0 |
| 0  | 0  | 0  | 0 | 0 | 0 | 0 | 0 |
| 0  | 0  | 0  | 0 | 0 | 0 | 0 | 0 |
| 0  | 0  | 0  | 0 | 0 | 0 | 0 | 0 |
| 1  | 0  | 0  | 0 | 0 | 0 | 0 | 0 |
| 1  | 0  | 0  | 0 | 0 | 0 | 0 | 0 |
| 0  | 0  | 0  | 0 | 0 | 0 | 0 | 0 |
| 1  | 0  | 0  | 0 | 0 | 0 | 0 | 0 |
| 0  | 0  | 0  | 0 | 0 | 0 | 0 | 0 |
| 2  | 0  | 0  | 0 | 2 | 0 | 2 | 7 |
| 0  | 0  | 0  | 0 | 0 | 0 | 0 | 0 |
| 0  | 0  | 0  | 0 | 0 | 0 | 0 | 0 |
| 1  | 0  | 0  | 0 | 0 | 0 | 0 | 0 |
| 0  | 0  | 0  | 0 | 0 | 0 | 0 | 0 |
| 1  | 0  | 0  | 0 | 0 | 0 | 0 | 0 |
| 2  | 1  | 1  | 0 | 0 | 0 | 0 | 0 |
| 0  | 0  | 0  | 0 | 0 | 0 | 0 | 0 |
| 4  | 5  | 0  | 2 | 1 | 0 | 1 | 1 |
| 2  | 0  | 2  | 0 | 0 | 0 | 0 | 0 |

|   |   |   |   |   |   |   |    |
|---|---|---|---|---|---|---|----|
| 0 | 0 | 0 | 0 | 0 | 0 | 0 | 0  |
| 5 | 2 | 2 | 1 | 0 | 1 | 0 | 0  |
| 0 | 0 | 0 | 0 | 0 | 0 | 2 | 0  |
| 1 | 0 | 0 | 0 | 0 | 0 | 0 | 0  |
| 0 | 0 | 0 | 2 | 0 | 0 | 0 | 0  |
| 0 | 0 | 0 | 0 | 0 | 0 | 0 | 0  |
| 0 | 0 | 0 | 0 | 0 | 0 | 0 | 0  |
| 0 | 0 | 0 | 0 | 0 | 0 | 0 | 0  |
| 0 | 0 | 0 | 0 | 0 | 0 | 0 | 0  |
| 0 | 0 | 0 | 0 | 0 | 0 | 0 | 99 |
| 1 | 0 | 0 | 0 | 0 | 0 | 0 | 0  |
| 0 | 0 | 0 | 0 | 0 | 0 | 0 | 0  |
| 2 | 0 | 0 | 0 | 0 | 0 | 0 | 0  |
| 0 | 0 | 0 | 0 | 0 | 0 | 0 | 0  |
| 1 | 0 | 0 | 0 | 0 | 0 | 0 | 0  |
| 0 | 0 | 0 | 0 | 0 | 0 | 0 | 0  |
| 5 | 0 | 0 | 0 | 0 | 0 | 0 | 0  |
| 0 | 1 | 0 | 0 | 0 | 0 | 0 | 0  |
| 0 | 1 | 0 | 0 | 0 | 0 | 0 | 0  |
| 0 | 0 | 0 | 0 | 0 | 0 | 0 | 0  |
| 0 | 0 | 0 | 0 | 0 | 0 | 0 | 0  |
| 1 | 0 | 0 | 0 | 1 | 0 | 0 | 0  |
| 2 | 0 | 0 | 0 | 0 | 0 | 0 | 0  |
| 0 | 0 | 0 | 0 | 0 | 0 | 2 | 7  |
| 0 | 0 | 0 | 0 | 0 | 0 | 0 | 0  |
| 0 | 0 | 0 | 0 | 0 | 0 | 0 | 0  |
| 0 | 0 | 0 | 0 | 0 | 0 | 0 | 0  |
| 0 | 0 | 0 | 0 | 0 | 0 | 0 | 0  |
| 0 | 0 | 0 | 0 | 0 | 0 | 1 | 3  |
| 0 | 0 | 0 | 0 | 0 | 0 | 0 | 0  |
| 0 | 1 | 0 | 0 | 0 | 0 | 0 | 0  |
| 0 | 0 | 0 | 0 | 0 | 0 | 0 | 0  |
| 0 | 0 | 0 | 1 | 0 | 0 | 0 | 0  |
| 0 | 0 | 0 | 0 | 0 | 0 | 0 | 0  |
| 0 | 0 | 0 | 0 | 0 | 0 | 0 | 0  |
| 1 | 0 | 0 | 0 | 0 | 0 | 0 | 0  |
| 0 | 0 | 0 | 0 | 0 | 0 | 0 | 0  |
| 1 | 0 | 0 | 0 | 0 | 0 | 0 | 0  |
| 0 | 0 | 0 | 0 | 0 | 0 | 0 | 0  |
| 0 | 0 | 0 | 0 | 0 | 0 | 0 | 0  |
| 1 | 0 | 0 | 0 | 0 | 0 | 1 | 6  |
| 0 | 0 | 0 | 0 | 0 | 0 | 0 | 0  |
| 2 | 4 | 0 | 2 | 0 | 0 | 1 | 6  |
| 0 | 0 | 0 | 0 | 0 | 0 | 1 | 6  |
| 0 | 0 | 0 | 0 | 0 | 0 | 0 | 0  |
| 5 | 1 | 0 | 0 | 3 | 0 | 1 | 1  |
| 1 | 0 | 0 | 0 | 0 | 0 | 0 | 0  |
| 0 | 0 | 0 | 0 | 0 | 0 | 0 | 0  |



|   |   |   |   |   |   |   |   |
|---|---|---|---|---|---|---|---|
| 0 | 0 | 0 | 0 | 0 | 0 | 0 | 0 |
| 1 | 0 | 0 | 0 | 0 | 0 | 2 | 7 |
| 0 | 0 | 0 | 0 | 0 | 0 | 0 | 0 |
| 0 | 0 | 0 | 0 | 0 | 0 | 0 | 0 |
| 1 | 0 | 0 | 0 | 0 | 0 | 1 | 1 |
| 0 | 0 | 0 | 0 | 0 | 0 | 2 | 7 |
| 0 | 0 | 0 | 1 | 0 | 0 | 0 | 0 |
| 0 | 0 | 0 | 0 | 0 | 0 | 0 | 0 |
| 0 | 0 | 0 | 1 | 1 | 1 | 1 | 0 |
| 0 | 0 | 0 | 0 | 0 | 0 | 0 | 0 |
| 0 | 0 | 0 | 0 | 0 | 0 | 0 | 0 |
| 1 | 0 | 0 | 0 | 0 | 0 | 0 | 0 |
| 0 | 0 | 0 | 2 | 0 | 0 | 0 | 0 |
| 2 | 2 | 1 | 3 | 0 | 0 | 0 | 0 |
| 0 | 0 | 0 | 0 | 0 | 0 | 0 | 0 |
| 1 | 0 | 0 | 0 | 0 | 0 | 0 | 0 |
| 1 | 0 | 0 | 0 | 0 | 0 | 0 | 0 |
| 0 | 0 | 0 | 0 | 0 | 0 | 2 | 0 |
| 0 | 0 | 0 | 0 | 0 | 0 | 0 | 0 |
| 0 | 0 | 0 | 0 | 0 | 0 | 0 | 0 |
| 2 | 0 | 0 | 0 | 0 | 0 | 0 | 0 |
| 0 | 1 | 0 | 0 | 0 | 0 | 0 | 0 |
| 1 | 0 | 0 | 1 | 0 | 0 | 0 | 7 |
| 1 | 0 | 0 | 0 | 0 | 0 | 0 | 0 |
| 4 | 5 | 3 | 1 | 0 | 1 | 0 | 0 |
| 0 | 0 | 0 | 0 | 0 | 0 | 0 | 0 |
| 1 | 0 | 0 | 0 | 0 | 0 | 0 | 0 |
| 0 | 0 | 0 | 0 | 0 | 0 | 0 | 0 |
| 0 | 0 | 0 | 0 | 0 | 0 | 0 | 0 |
| 0 | 0 | 0 | 0 | 0 | 0 | 0 | 0 |
| 0 | 0 | 0 | 0 | 0 | 0 | 0 | 0 |
| 0 | 0 | 0 | 0 | 0 | 0 | 0 | 0 |
| 0 | 0 | 0 | 0 | 0 | 0 | 0 | 0 |
| 0 | 0 | 0 | 0 | 0 | 0 | 0 | 0 |
| 0 | 0 | 0 | 0 | 0 | 0 | 0 | 0 |
| 0 | 0 | 0 | 0 | 0 | 0 | 0 | 0 |
| 0 | 0 | 0 | 0 | 0 | 0 | 0 | 0 |
| 0 | 0 | 0 | 0 | 0 | 0 | 0 | 0 |
| 1 | 0 | 0 | 0 | 0 | 0 | 0 | 0 |
| 0 | 0 | 0 | 0 | 0 | 0 | 0 | 0 |
| 1 | 2 | 0 | 0 | 0 | 0 | 0 | 0 |
| 0 | 0 | 0 | 0 | 0 | 0 | 0 | 0 |
| 2 | 0 | 0 | 0 | 0 | 0 | 0 | 0 |
| 1 | 0 | 0 | 0 | 0 | 0 | 0 | 0 |
| 0 | 0 | 0 | 0 | 0 | 0 | 0 | 0 |
| 0 | 0 | 0 | 0 | 1 | 0 | 0 | 0 |
| 0 | 0 | 0 | 0 | 0 | 0 | 0 | 0 |
| 0 | 0 | 0 | 0 | 0 | 0 | 0 | 0 |
| 0 | 0 | 0 | 0 | 0 | 0 | 0 | 0 |

|    |   |   |   |   |   |   |   |
|----|---|---|---|---|---|---|---|
| 1  | 0 | 0 | 1 | 0 | 0 | 0 | 0 |
| 0  | 0 | 0 | 0 | 0 | 0 | 0 | 0 |
| 99 | 0 | 0 | 0 | 0 | 0 | 0 | 0 |
| 0  | 0 | 0 | 0 | 0 | 0 | 0 | 0 |
| 0  | 0 | 0 | 0 | 0 | 0 | 0 | 0 |
| 0  | 0 | 0 | 0 | 0 | 0 | 0 | 0 |
| 0  | 0 | 0 | 0 | 0 | 0 | 0 | 0 |
| 0  | 0 | 0 | 0 | 0 | 0 | 0 | 7 |
| 2  | 0 | 0 | 1 | 1 | 0 | 0 | 0 |
| 2  | 1 | 0 | 0 | 0 | 0 | 0 | 0 |
| 0  | 0 | 0 | 0 | 0 | 0 | 0 | 0 |
| 1  | 0 | 0 | 0 | 0 | 0 | 0 | 0 |
| 0  | 0 | 0 | 0 | 0 | 0 | 0 | 0 |
| 2  | 1 | 0 | 0 | 0 | 0 | 0 | 0 |
| 0  | 0 | 0 | 0 | 0 | 0 | 0 | 0 |
| 1  | 0 | 0 | 0 | 0 | 0 | 0 | 0 |
| 0  | 0 | 0 | 0 | 0 | 0 | 0 | 0 |
| 0  | 0 | 0 | 0 | 0 | 0 | 0 | 0 |
| 5  | 5 | 3 | 2 | 1 | 4 | 1 | 6 |
| 0  | 0 | 0 | 0 | 0 | 0 | 0 | 0 |
| 0  | 0 | 0 | 0 | 0 | 0 | 2 | 7 |
| 2  | 0 | 0 | 0 | 0 | 0 | 2 | 7 |
| 0  | 0 | 0 | 0 | 0 | 0 | 0 | 0 |
| 0  | 0 | 0 | 0 | 0 | 0 | 0 | 0 |
| 1  | 0 | 0 | 0 | 0 | 0 | 0 | 0 |
| 2  | 0 | 0 | 0 | 5 | 0 | 0 | 0 |
| 0  | 0 | 0 | 0 | 0 | 0 | 0 | 0 |
| 99 | 0 | 0 | 0 | 0 | 0 | 0 | 0 |
| 0  | 0 | 0 | 0 | 0 | 0 | 0 | 0 |
| 3  | 1 | 0 | 0 | 0 | 0 | 0 | 0 |
| 2  | 1 | 0 | 0 | 0 | 0 | 1 | 1 |
| 0  | 0 | 0 | 0 | 0 | 0 | 0 | 0 |
| 1  | 0 | 0 | 1 | 0 | 0 | 0 | 0 |
| 0  | 0 | 0 | 0 | 0 | 0 | 0 | 0 |
| 0  | 0 | 1 | 0 | 0 | 0 | 0 | 0 |
| 0  | 0 | 0 | 0 | 0 | 0 | 0 | 0 |
| 0  | 0 | 0 | 0 | 0 | 0 | 0 | 0 |
| 0  | 0 | 0 | 0 | 1 | 0 | 0 | 0 |
| 1  | 0 | 0 | 2 | 0 | 0 | 0 | 0 |
| 0  | 0 | 0 | 0 | 0 | 0 | 0 | 0 |
| 0  | 0 | 0 | 0 | 0 | 0 | 0 | 0 |
| 1  | 0 | 0 | 0 | 0 | 0 | 0 | 0 |
| 0  | 0 | 0 | 0 | 1 | 0 | 0 | 0 |
| 1  | 0 | 0 | 0 | 0 | 0 | 2 | 7 |
| 1  | 1 | 0 | 0 | 0 | 0 | 1 | 1 |
| 0  | 0 | 0 | 1 | 1 | 0 | 2 | 7 |
| 0  | 0 | 0 | 0 | 0 | 0 | 0 | 0 |

|    |    |    |    |    |    |    |    |
|----|----|----|----|----|----|----|----|
| 1  | 1  | 0  | 0  | 2  | 0  | 0  | 0  |
| 99 | 0  | 99 | 0  | 0  | 0  | 0  | 0  |
| 1  | 0  | 0  | 0  | 0  | 0  | 0  | 0  |
| 0  | 0  | 99 | 0  | 0  | 0  | 0  | 0  |
| 0  | 0  | 0  | 0  | 0  | 0  | 0  | 0  |
| 2  | 0  | 0  | 0  | 0  | 0  | 0  | 0  |
| 1  | 0  | 0  | 0  | 0  | 0  | 0  | 0  |
| 0  | 0  | 0  | 0  | 1  | 0  | 0  | 0  |
| 0  | 0  | 0  | 0  | 0  | 0  | 0  | 0  |
| 0  | 0  | 0  | 0  | 0  | 0  | 0  | 0  |
| 1  | 0  | 0  | 0  | 0  | 0  | 0  | 0  |
| 2  | 0  | 0  | 0  | 0  | 0  | 0  | 0  |
| 1  | 0  | 0  | 0  | 0  | 0  | 0  | 7  |
| 1  | 0  | 0  | 0  | 0  | 0  | 0  | 0  |
| 0  | 0  | 0  | 0  | 0  | 0  | 0  | 0  |
| 1  | 0  | 0  | 0  | 0  | 0  | 0  | 0  |
| 0  | 0  | 0  | 0  | 0  | 0  | 2  | 99 |
| 0  | 0  | 0  | 0  | 0  | 0  | 0  | 0  |
| 0  | 0  | 0  | 0  | 0  | 0  | 0  | 0  |
| 2  | 0  | 0  | 0  | 0  | 0  | 0  | 0  |
| 0  | 0  | 0  | 0  | 0  | 0  | 0  | 0  |
| 1  | 0  | 0  | 1  | 0  | 0  | 0  | 0  |
| 0  | 0  | 0  | 0  | 1  | 0  | 0  | 0  |
| 0  | 0  | 0  | 0  | 0  | 0  | 2  | 7  |
| 2  | 0  | 0  | 0  | 0  | 0  | 0  | 0  |
| 1  | 0  | 0  | 0  | 1  | 0  | 0  | 0  |
| 0  | 0  | 0  | 0  | 0  | 0  | 0  | 0  |
| 0  | 0  | 0  | 0  | 0  | 0  | 0  | 0  |
| 0  | 0  | 0  | 0  | 0  | 0  | 0  | 0  |
| 1  | 0  | 0  | 0  | 0  | 0  | 0  | 0  |
| 0  | 0  | 0  | 0  | 0  | 0  | 0  | 0  |
| 0  | 0  | 0  | 0  | 0  | 0  | 0  | 0  |
| 1  | 0  | 0  | 0  | 0  | 0  | 0  | 0  |
| 1  | 0  | 0  | 0  | 0  | 0  | 0  | 0  |
| 1  | 0  | 0  | 0  | 0  | 0  | 0  | 0  |
| 1  | 0  | 0  | 0  | 0  | 0  | 0  | 0  |
| 1  | 0  | 0  | 0  | 0  | 0  | 0  | 0  |
| 2  | 0  | 0  | 0  | 0  | 0  | 0  | 0  |
| 1  | 0  | 0  | 0  | 0  | 0  | 0  | 0  |
| 1  | 0  | 0  | 0  | 0  | 0  | 0  | 0  |
| 1  | 0  | 0  | 1  | 0  | 0  | 0  | 0  |
| 1  | 0  | 0  | 1  | 0  | 0  | 0  | 0  |
| 99 | 99 | 99 | 99 | 99 | 99 | 99 | 99 |
| 0  | 1  | 0  | 4  | 5  | 0  | 2  | 7  |
| 0  | 0  | 0  | 0  | 0  | 0  | 0  | 0  |
| 0  | 0  | 0  | 0  | 0  | 0  | 0  | 0  |
| 0  | 0  | 0  | 0  | 0  | 0  | 0  | 0  |
| 2  | 1  | 0  | 0  | 0  | 0  | 0  | 0  |

|   |   |   |   |   |   |   |   |
|---|---|---|---|---|---|---|---|
| 2 | 0 | 0 | 0 | 0 | 0 | 0 | 0 |
| 2 | 0 | 0 | 0 | 0 | 0 | 0 | 0 |
| 0 | 0 | 0 | 0 | 0 | 0 | 0 | 0 |
| 2 | 0 | 0 | 0 | 0 | 0 | 0 | 0 |
| 3 | 3 | 0 | 0 | 0 | 0 | 0 | 0 |
| 5 | 3 | 0 | 0 | 0 | 0 | 2 | 7 |
| 3 | 2 | 0 | 0 | 0 | 0 | 1 | 1 |
| 0 | 0 | 0 | 0 | 0 | 0 | 0 | 0 |
| 0 | 0 | 0 | 0 | 0 | 0 | 0 | 0 |
| 0 | 0 | 0 | 0 | 0 | 0 | 0 | 0 |
| 2 | 0 | 0 | 0 | 5 | 0 | 0 | 0 |
| 2 | 0 | 0 | 0 | 2 | 0 | 0 | 0 |
| 4 | 0 | 0 | 0 | 0 | 0 | 0 | 0 |
| 5 | 0 | 0 | 0 | 0 | 0 | 0 | 0 |
| 2 | 2 | 2 | 2 | 0 | 0 | 0 | 0 |
| 1 | 0 | 0 | 0 | 0 | 0 | 2 | 7 |
| 0 | 0 | 0 | 0 | 1 | 0 | 0 | 0 |
| 1 | 0 | 0 | 0 | 0 | 0 | 0 | 0 |
| 5 | 4 | 2 | 1 | 0 | 1 | 0 | 0 |
| 3 | 5 | 0 | 3 | 0 | 0 | 1 | 1 |
| 3 | 3 | 1 | 0 | 0 | 0 | 0 | 0 |
| 1 | 1 | 0 | 0 | 0 | 0 | 1 | 3 |
| 1 | 0 | 0 | 0 | 0 | 0 | 0 | 0 |
| 5 | 0 | 0 | 0 | 0 | 0 | 0 | 0 |
| 2 | 0 | 0 | 0 | 1 | 0 | 0 | 0 |
| 3 | 0 | 0 | 0 | 0 | 0 | 0 | 0 |
| 5 | 0 | 0 | 0 | 0 | 0 | 0 | 0 |
| 1 | 0 | 0 | 0 | 0 | 0 | 0 | 0 |
| 1 | 0 | 0 | 0 | 0 | 0 | 0 | 0 |
| 0 | 0 | 0 | 0 | 0 | 0 | 0 | 0 |
| 1 | 0 | 0 | 0 | 0 | 0 | 0 | 0 |
| 1 | 0 | 0 | 0 | 0 | 0 | 0 | 0 |
| 0 | 0 | 0 | 0 | 0 | 0 | 0 | 0 |
| 3 | 4 | 0 | 0 | 2 | 0 | 1 | 3 |
| 5 | 5 | 5 | 5 | 0 | 2 | 1 | 3 |
| 2 | 0 | 0 | 0 | 1 | 0 | 0 | 0 |
| 0 | 0 | 0 | 0 | 0 | 0 | 0 | 0 |
| 0 | 0 | 0 | 0 | 0 | 0 | 0 | 0 |
| 4 | 5 | 0 | 2 | 0 | 0 | 0 | 0 |
| 2 | 0 | 0 | 0 | 0 | 0 | 0 | 0 |
| 0 | 0 | 0 | 0 | 0 | 0 | 0 | 7 |
| 0 | 0 | 0 | 0 | 0 | 0 | 0 | 0 |
| 1 | 0 | 0 | 0 | 0 | 0 | 0 | 0 |
| 0 | 0 | 0 | 0 | 0 | 0 | 0 | 0 |
| 0 | 0 | 0 | 0 | 0 | 0 | 0 | 0 |
| 2 | 0 | 0 | 0 | 0 | 0 | 0 | 0 |
| 1 | 0 | 0 | 0 | 0 | 0 | 0 | 0 |
| 3 | 1 | 0 | 0 | 0 | 0 | 0 | 0 |

|   |   |    |   |   |   |   |   |
|---|---|----|---|---|---|---|---|
| 0 | 0 | 0  | 0 | 0 | 0 | 0 | 0 |
| 3 | 4 | 0  | 0 | 5 | 0 | 1 | 1 |
| 1 | 0 | 0  | 0 | 0 | 0 | 0 | 0 |
| 0 | 0 | 0  | 0 | 0 | 0 | 0 | 0 |
| 0 | 0 | 0  | 2 | 0 | 0 | 0 | 0 |
| 5 | 5 | 99 | 2 | 0 | 0 | 1 | 1 |
| 5 | 0 | 0  | 0 | 0 | 0 | 0 | 0 |
| 1 | 3 | 3  | 2 | 0 | 0 | 1 | 6 |
| 3 | 5 | 0  | 0 | 0 | 0 | 1 | 6 |
| 3 | 0 | 0  | 0 | 0 | 0 | 0 | 0 |
| 1 | 0 | 0  | 0 | 0 | 0 | 0 | 0 |
| 2 | 0 | 0  | 0 | 0 | 0 | 0 | 0 |
| 0 | 0 | 0  | 0 | 0 | 0 | 0 | 0 |
| 1 | 0 | 0  | 0 | 0 | 0 | 0 | 0 |
| 0 | 0 | 0  | 0 | 0 | 0 | 0 | 0 |
| 0 | 0 | 0  | 1 | 0 | 0 | 0 | 0 |
| 1 | 0 | 0  | 0 | 1 | 0 | 0 | 0 |
| 0 | 0 | 0  | 0 | 0 | 0 | 0 | 0 |
| 0 | 0 | 0  | 0 | 0 | 0 | 0 | 0 |
| 0 | 0 | 0  | 0 | 0 | 0 | 0 | 0 |
| 1 | 0 | 0  | 0 | 0 | 0 | 0 | 0 |
| 0 | 0 | 0  | 0 | 0 | 0 | 0 | 0 |
| 0 | 0 | 0  | 0 | 0 | 0 | 0 | 0 |
| 1 | 0 | 0  | 0 | 0 | 0 | 0 | 0 |
| 0 | 0 | 0  | 0 | 0 | 0 | 0 | 0 |
| 0 | 0 | 0  | 0 | 0 | 0 | 0 | 0 |
| 3 | 0 | 0  | 1 | 0 | 0 | 0 | 0 |
| 1 | 0 | 0  | 1 | 0 | 0 | 0 | 0 |
| 1 | 0 | 0  | 0 | 0 | 0 | 0 | 0 |
| 1 | 0 | 0  | 0 | 0 | 0 | 0 | 0 |
| 0 | 0 | 0  | 0 | 0 | 0 | 0 | 0 |
| 0 | 0 | 0  | 0 | 0 | 0 | 2 | 0 |
| 0 | 0 | 0  | 0 | 0 | 0 | 0 | 0 |
| 2 | 0 | 0  | 0 | 0 | 0 | 0 | 0 |
| 0 | 0 | 0  | 0 | 0 | 0 | 0 | 0 |
| 2 | 3 | 0  | 1 | 0 | 0 | 0 | 0 |
| 0 | 0 | 0  | 0 | 0 | 0 | 0 | 0 |
| 1 | 1 | 0  | 0 | 0 | 0 | 0 | 0 |
| 0 | 0 | 0  | 0 | 0 | 0 | 0 | 0 |
| 0 | 0 | 0  | 0 | 0 | 0 | 0 | 0 |
| 0 | 0 | 0  | 0 | 0 | 0 | 0 | 0 |
| 0 | 0 | 0  | 0 | 0 | 0 | 0 | 0 |
| 1 | 0 | 0  | 0 | 0 | 0 | 0 | 0 |
| 1 | 0 | 0  | 0 | 1 | 0 | 2 | 0 |
| 0 | 0 | 0  | 0 | 0 | 0 | 0 | 0 |
| 0 | 0 | 0  | 0 | 0 | 0 | 0 | 0 |
| 5 | 5 | 3  | 0 | 4 | 0 | 0 | 0 |
| 0 | 0 | 0  | 0 | 0 | 0 | 0 | 0 |
| 0 | 0 | 0  | 0 | 1 | 0 | 0 | 0 |
| 5 | 2 | 2  | 0 | 2 | 0 | 0 | 0 |
| 1 | 0 | 0  | 0 | 0 | 0 | 0 | 0 |



|   |   |   |   |   |   |    |   |
|---|---|---|---|---|---|----|---|
| 1 | 0 | 0 | 0 | 0 | 0 | 0  | 0 |
| 4 | 5 | 5 | 0 | 0 | 0 | 1  | 1 |
| 1 | 0 | 0 | 0 | 0 | 0 | 0  | 0 |
| 0 | 0 | 0 | 0 | 0 | 0 | 0  | 0 |
| 0 | 0 | 0 | 0 | 0 | 0 | 0  | 0 |
| 0 | 0 | 0 | 0 | 0 | 0 | 0  | 0 |
| 4 | 0 | 0 | 5 | 3 | 0 | 2  | 7 |
| 1 | 4 | 0 | 0 | 0 | 0 | 0  | 0 |
| 2 | 0 | 0 | 0 | 0 | 0 | 1  | 1 |
| 0 | 0 | 0 | 0 | 0 | 0 | 0  | 0 |
| 0 | 0 | 0 | 0 | 0 | 0 | 0  | 0 |
| 0 | 0 | 0 | 0 | 0 | 0 | 0  | 0 |
| 2 | 0 | 0 | 0 | 0 | 0 | 0  | 0 |
| 1 | 0 | 0 | 0 | 0 | 0 | 0  | 0 |
| 1 | 0 | 0 | 0 | 0 | 0 | 0  | 0 |
| 0 | 0 | 0 | 0 | 0 | 0 | 0  | 0 |
| 0 | 0 | 0 | 0 | 0 | 0 | 0  | 0 |
| 2 | 0 | 0 | 0 | 0 | 0 | 0  | 0 |
| 1 | 2 | 0 | 1 | 1 | 0 | 0  | 0 |
| 1 | 0 | 0 | 0 | 1 | 0 | 0  | 0 |
| 1 | 4 | 0 | 0 | 0 | 0 | 0  | 0 |
| 0 | 0 | 0 | 2 | 0 | 0 | 0  | 0 |
| 2 | 0 | 0 | 2 | 0 | 0 | 0  | 0 |
| 0 | 0 | 0 | 0 | 0 | 0 | 0  | 0 |
| 0 | 0 | 0 | 0 | 0 | 0 | 0  | 7 |
| 0 | 0 | 0 | 0 | 0 | 0 | 0  | 0 |
| 3 | 0 | 0 | 0 | 0 | 0 | 0  | 0 |
| 0 | 0 | 0 | 0 | 0 | 0 | 0  | 0 |
| 0 | 0 | 0 | 0 | 0 | 0 | 0  | 0 |
| 0 | 0 | 0 | 0 | 0 | 0 | 0  | 0 |
| 0 | 0 | 0 | 0 | 0 | 0 | 1  | 6 |
| 1 | 0 | 0 | 0 | 0 | 0 | 0  | 0 |
| 0 | 5 | 0 | 0 | 0 | 0 | 0  | 0 |
| 0 | 0 | 0 | 0 | 0 | 0 | 0  | 0 |
| 1 | 2 | 0 | 1 | 1 | 0 | 1  | 1 |
| 0 | 0 | 0 | 0 | 0 | 0 | 0  | 0 |
| 3 | 4 | 0 | 0 | 0 | 0 | 0  | 0 |
| 1 | 0 | 0 | 0 | 0 | 0 | 2  | 7 |
| 1 | 0 | 0 | 0 | 0 | 0 | 2  | 0 |
| 4 | 2 | 2 | 1 | 2 | 0 | 0  | 0 |
| 0 | 5 | 2 | 0 | 0 | 0 | 1  | 6 |
| 1 | 0 | 0 | 0 | 0 | 0 | 0  | 0 |
| 1 | 0 | 0 | 0 | 0 | 0 | 0  | 0 |
| 0 | 0 | 0 | 0 | 0 | 0 | 99 | 0 |
| 0 | 0 | 0 | 0 | 0 | 0 | 2  | 7 |
| 1 | 0 | 0 | 1 | 0 | 0 | 0  | 0 |
| 0 | 0 | 0 | 0 | 0 | 0 | 0  | 0 |

|    |   |    |    |   |   |    |    |
|----|---|----|----|---|---|----|----|
| 0  | 0 | 0  | 0  | 0 | 0 | 0  | 0  |
| 0  | 0 | 0  | 0  | 0 | 0 | 2  | 7  |
| 2  | 2 | 2  | 0  | 0 | 0 | 0  | 0  |
| 1  | 1 | 1  | 1  | 0 | 0 | 1  | 3  |
| 1  | 1 | 0  | 0  | 0 | 0 | 0  | 0  |
| 0  | 0 | 0  | 0  | 0 | 0 | 0  | 0  |
| 5  | 5 | 5  | 5  | 5 | 5 | 1  | 6  |
| 0  | 0 | 0  | 0  | 0 | 0 | 0  | 0  |
| 0  | 0 | 0  | 0  | 0 | 0 | 0  | 0  |
| 0  | 0 | 0  | 0  | 0 | 0 | 0  | 0  |
| 0  | 0 | 0  | 0  | 1 | 0 | 0  | 0  |
| 0  | 0 | 0  | 0  | 0 | 0 | 0  | 0  |
| 1  | 0 | 0  | 0  | 0 | 0 | 0  | 0  |
| 0  | 0 | 0  | 0  | 0 | 0 | 0  | 0  |
| 1  | 0 | 0  | 0  | 0 | 0 | 0  | 0  |
| 2  | 0 | 0  | 0  | 0 | 0 | 0  | 0  |
| 0  | 0 | 0  | 0  | 0 | 0 | 1  | 6  |
| 0  | 0 | 0  | 0  | 0 | 0 | 0  | 0  |
| 4  | 0 | 0  | 1  | 0 | 0 | 0  | 0  |
| 3  | 0 | 0  | 0  | 0 | 0 | 0  | 0  |
| 1  | 0 | 0  | 0  | 0 | 0 | 0  | 0  |
| 0  | 0 | 0  | 0  | 0 | 0 | 0  | 0  |
| 0  | 0 | 0  | 0  | 0 | 0 | 0  | 0  |
| 0  | 0 | 0  | 0  | 0 | 0 | 0  | 0  |
| 0  | 0 | 0  | 0  | 0 | 0 | 0  | 0  |
| 0  | 0 | 0  | 0  | 0 | 0 | 0  | 0  |
| 0  | 0 | 0  | 0  | 0 | 0 | 0  | 0  |
| 0  | 0 | 0  | 0  | 0 | 0 | 0  | 0  |
| 0  | 0 | 0  | 0  | 0 | 0 | 0  | 0  |
| 0  | 0 | 0  | 0  | 0 | 0 | 0  | 0  |
| 0  | 0 | 0  | 0  | 0 | 0 | 2  | 0  |
| 1  | 0 | 0  | 0  | 0 | 0 | 0  | 0  |
| 1  | 0 | 0  | 0  | 0 | 0 | 0  | 0  |
| 0  | 0 | 0  | 0  | 0 | 0 | 0  | 0  |
| 1  | 0 | 0  | 0  | 0 | 0 | 0  | 0  |
| 0  | 0 | 0  | 0  | 0 | 0 | 0  | 0  |
| 1  | 0 | 0  | 0  | 0 | 0 | 0  | 7  |
| 0  | 0 | 0  | 0  | 0 | 0 | 0  | 0  |
| 0  | 0 | 0  | 0  | 0 | 0 | 0  | 0  |
| 0  | 0 | 0  | 99 | 0 | 0 | 0  | 0  |
| 1  | 0 | 0  | 0  | 0 | 0 | 0  | 0  |
| 0  | 0 | 0  | 0  | 0 | 0 | 2  | 0  |
| 0  | 0 | 0  | 0  | 0 | 0 | 0  | 0  |
| 1  | 0 | 0  | 0  | 0 | 0 | 0  | 0  |
| 0  | 0 | 0  | 0  | 0 | 0 | 0  | 0  |
| 0  | 0 | 0  | 0  | 0 | 0 | 0  | 0  |
| 99 | 1 | 99 | 0  | 0 | 0 | 0  | 0  |
| 0  | 0 | 0  | 0  | 0 | 0 | 0  | 0  |
| 0  | 0 | 0  | 0  | 0 | 0 | 99 | 99 |
| 1  | 0 | 0  | 0  | 0 | 0 | 0  | 0  |

|    |   |   |   |   |   |   |    |
|----|---|---|---|---|---|---|----|
| 0  | 0 | 0 | 0 | 0 | 0 | 0 | 0  |
| 0  | 0 | 0 | 0 | 0 | 0 | 0 | 0  |
| 0  | 0 | 0 | 0 | 0 | 0 | 0 | 0  |
| 0  | 0 | 0 | 0 | 0 | 0 | 0 | 0  |
| 0  | 0 | 0 | 0 | 0 | 0 | 0 | 0  |
| 0  | 0 | 0 | 0 | 0 | 0 | 0 | 0  |
| 0  | 0 | 0 | 0 | 0 | 0 | 0 | 0  |
| 0  | 0 | 0 | 0 | 0 | 0 | 0 | 0  |
| 0  | 0 | 0 | 1 | 0 | 0 | 0 | 0  |
| 1  | 0 | 0 | 0 | 0 | 0 | 0 | 0  |
| 0  | 0 | 0 | 0 | 0 | 0 | 0 | 0  |
| 0  | 0 | 0 | 0 | 0 | 0 | 0 | 0  |
| 0  | 0 | 0 | 0 | 0 | 0 | 2 | 7  |
| 0  | 0 | 0 | 0 | 0 | 0 | 0 | 0  |
| 0  | 0 | 0 | 0 | 0 | 0 | 0 | 0  |
| 1  | 0 | 0 | 0 | 0 | 0 | 0 | 0  |
| 0  | 0 | 0 | 0 | 0 | 0 | 0 | 0  |
| 2  | 0 | 0 | 0 | 0 | 0 | 2 | 7  |
| 0  | 0 | 0 | 0 | 0 | 0 | 0 | 0  |
| 0  | 0 | 0 | 0 | 0 | 0 | 0 | 0  |
| 1  | 0 | 0 | 0 | 0 | 0 | 0 | 0  |
| 0  | 0 | 0 | 0 | 0 | 0 | 0 | 0  |
| 0  | 0 | 0 | 0 | 0 | 0 | 0 | 0  |
| 0  | 0 | 0 | 1 | 2 | 1 | 0 | 0  |
| 0  | 0 | 0 | 0 | 0 | 0 | 0 | 0  |
| 0  | 0 | 0 | 0 | 0 | 0 | 0 | 0  |
| 1  | 0 | 0 | 0 | 0 | 0 | 0 | 0  |
| 0  | 0 | 0 | 0 | 0 | 0 | 0 | 0  |
| 0  | 0 | 0 | 0 | 0 | 0 | 0 | 0  |
| 0  | 0 | 0 | 0 | 0 | 0 | 0 | 0  |
| 0  | 0 | 0 | 0 | 0 | 0 | 0 | 0  |
| 0  | 0 | 0 | 0 | 0 | 0 | 0 | 0  |
| 99 | 2 | 0 | 0 | 0 | 0 | 1 | 1  |
| 1  | 0 | 0 | 0 | 0 | 0 | 0 | 0  |
| 1  | 0 | 0 | 0 | 0 | 0 | 0 | 0  |
| 0  | 0 | 0 | 0 | 0 | 0 | 0 | 0  |
| 0  | 0 | 0 | 0 | 0 | 0 | 0 | 0  |
| 0  | 0 | 0 | 0 | 0 | 0 | 0 | 99 |
| 0  | 0 | 0 | 0 | 0 | 0 | 0 | 0  |
| 1  | 0 | 0 | 0 | 1 | 0 | 0 | 0  |
| 0  | 0 | 0 | 0 | 0 | 0 | 0 | 0  |
| 0  | 0 | 0 | 0 | 0 | 0 | 0 | 0  |
| 0  | 0 | 0 | 0 | 0 | 0 | 0 | 0  |
| 1  | 0 | 0 | 0 | 0 | 0 | 0 | 0  |
| 2  | 0 | 0 | 0 | 0 | 0 | 0 | 0  |
| 1  | 0 | 0 | 0 | 0 | 0 | 0 | 0  |
| 0  | 0 | 0 | 0 | 0 | 0 | 0 | 0  |
| 0  | 0 | 0 | 0 | 0 | 0 | 0 | 0  |
| 0  | 0 | 0 | 0 | 0 | 0 | 0 | 0  |

|   |   |   |   |   |   |    |    |
|---|---|---|---|---|---|----|----|
| 0 | 0 | 0 | 0 | 0 | 0 | 0  | 0  |
| 0 | 0 | 0 | 0 | 0 | 0 | 0  | 0  |
| 1 | 0 | 0 | 0 | 0 | 0 | 0  | 0  |
| 0 | 0 | 0 | 0 | 0 | 0 | 0  | 0  |
| 0 | 0 | 0 | 0 | 0 | 0 | 0  | 0  |
| 0 | 0 | 0 | 0 | 0 | 0 | 0  | 0  |
| 0 | 1 | 0 | 0 | 0 | 0 | 1  | 2  |
| 1 | 5 | 0 | 0 | 0 | 0 | 1  | 2  |
| 0 | 0 | 0 | 0 | 0 | 0 | 0  | 0  |
| 0 | 0 | 0 | 0 | 0 | 0 | 0  | 0  |
| 0 | 0 | 0 | 0 | 0 | 0 | 0  | 0  |
| 0 | 0 | 0 | 0 | 0 | 0 | 0  | 0  |
| 0 | 2 | 2 | 0 | 0 | 0 | 0  | 0  |
| 0 | 0 | 0 | 0 | 0 | 0 | 0  | 0  |
| 0 | 0 | 0 | 0 | 0 | 0 | 0  | 0  |
| 1 | 0 | 0 | 0 | 0 | 0 | 0  | 0  |
| 1 | 0 | 0 | 0 | 0 | 0 | 0  | 0  |
| 1 | 0 | 0 | 0 | 0 | 0 | 0  | 0  |
| 0 | 0 | 0 | 0 | 0 | 0 | 0  | 99 |
| 1 | 0 | 0 | 0 | 0 | 0 | 0  | 0  |
| 0 | 0 | 0 | 1 | 0 | 0 | 0  | 0  |
| 0 | 0 | 0 | 0 | 0 | 0 | 0  | 0  |
| 0 | 0 | 0 | 0 | 0 | 0 | 0  | 0  |
| 0 | 0 | 0 | 0 | 0 | 0 | 0  | 0  |
| 0 | 0 | 0 | 0 | 0 | 0 | 0  | 0  |
| 0 | 0 | 0 | 0 | 0 | 0 | 0  | 0  |
| 0 | 0 | 0 | 0 | 0 | 0 | 0  | 0  |
| 0 | 0 | 0 | 0 | 0 | 0 | 0  | 0  |
| 2 | 0 | 0 | 0 | 0 | 0 | 0  | 0  |
| 0 | 0 | 0 | 0 | 0 | 0 | 0  | 0  |
| 0 | 0 | 0 | 0 | 0 | 0 | 0  | 0  |
| 0 | 0 | 0 | 0 | 0 | 0 | 0  | 0  |
| 0 | 0 | 0 | 0 | 0 | 0 | 0  | 0  |
| 0 | 0 | 0 | 0 | 0 | 0 | 0  | 0  |
| 0 | 0 | 0 | 0 | 0 | 0 | 99 | 99 |
| 0 | 0 | 0 | 0 | 0 | 0 | 0  | 0  |
| 0 | 0 | 0 | 0 | 0 | 0 | 0  | 0  |
| 0 | 0 | 0 | 0 | 0 | 0 | 0  | 0  |
| 0 | 0 | 0 | 0 | 0 | 0 | 0  | 0  |
| 0 | 0 | 0 | 0 | 0 | 0 | 0  | 0  |
| 0 | 0 | 0 | 0 | 0 | 0 | 0  | 0  |
| 0 | 0 | 0 | 0 | 0 | 0 | 0  | 0  |
| 1 | 0 | 0 | 0 | 0 | 0 | 0  | 0  |
| 1 | 0 | 0 | 0 | 0 | 0 | 0  | 0  |
| 0 | 0 | 0 | 0 | 0 | 0 | 0  | 0  |
| 0 | 0 | 0 | 0 | 0 | 0 | 0  | 0  |
| 2 | 0 | 0 | 0 | 0 | 2 | 0  | 1  |
| 1 | 0 | 0 | 0 | 0 | 0 | 0  | 0  |
| 0 | 0 | 0 | 0 | 0 | 0 | 99 | 99 |
| 1 | 0 | 0 | 0 | 0 | 0 | 1  | 1  |
| 0 | 0 | 0 | 0 | 0 | 0 | 1  | 1  |
| 0 | 0 | 0 | 0 | 0 | 0 | 0  | 0  |

|    |   |    |   |   |   |    |    |
|----|---|----|---|---|---|----|----|
| 0  | 0 | 0  | 0 | 0 | 0 | 0  | 7  |
| 0  | 0 | 0  | 0 | 0 | 0 | 0  | 0  |
| 0  | 0 | 0  | 0 | 0 | 0 | 0  | 0  |
| 0  | 0 | 0  | 0 | 0 | 0 | 0  | 0  |
| 0  | 0 | 0  | 0 | 0 | 0 | 0  | 7  |
| 1  | 0 | 0  | 0 | 0 | 0 | 0  | 0  |
| 0  | 0 | 0  | 0 | 0 | 0 | 0  | 0  |
| 0  | 0 | 0  | 0 | 0 | 0 | 0  | 0  |
| 0  | 0 | 0  | 0 | 0 | 0 | 0  | 0  |
| 1  | 0 | 0  | 0 | 0 | 0 | 2  | 1  |
| 0  | 0 | 0  | 0 | 0 | 0 | 0  | 0  |
| 0  | 0 | 0  | 0 | 0 | 0 | 0  | 0  |
| 0  | 0 | 0  | 0 | 0 | 0 | 0  | 0  |
| 0  | 0 | 0  | 0 | 0 | 0 | 0  | 0  |
| 2  | 0 | 0  | 0 | 0 | 0 | 0  | 0  |
| 3  | 0 | 0  | 0 | 0 | 0 | 0  | 0  |
| 0  | 0 | 0  | 0 | 0 | 0 | 0  | 0  |
| 1  | 0 | 0  | 0 | 0 | 0 | 0  | 0  |
| 1  | 0 | 0  | 0 | 0 | 0 | 0  | 0  |
| 0  | 0 | 0  | 0 | 0 | 0 | 0  | 0  |
| 0  | 0 | 0  | 0 | 0 | 0 | 99 | 99 |
| 1  | 0 | 0  | 0 | 0 | 0 | 0  | 0  |
| 0  | 0 | 0  | 0 | 0 | 0 | 0  | 0  |
| 0  | 0 | 0  | 0 | 0 | 0 | 0  | 0  |
| 0  | 0 | 0  | 0 | 1 | 0 | 0  | 0  |
| 0  | 0 | 0  | 0 | 0 | 0 | 0  | 0  |
| 0  | 0 | 0  | 0 | 0 | 0 | 0  | 0  |
| 0  | 0 | 0  | 0 | 0 | 0 | 0  | 0  |
| 0  | 0 | 0  | 0 | 0 | 0 | 0  | 0  |
| 0  | 0 | 0  | 0 | 0 | 0 | 0  | 0  |
| 0  | 0 | 0  | 0 | 0 | 0 | 0  | 0  |
| 0  | 0 | 0  | 0 | 0 | 0 | 0  | 0  |
| 0  | 0 | 0  | 0 | 0 | 0 | 0  | 0  |
| 0  | 0 | 0  | 0 | 0 | 0 | 0  | 0  |
| 0  | 0 | 0  | 0 | 0 | 0 | 0  | 0  |
| 0  | 0 | 0  | 0 | 0 | 0 | 0  | 0  |
| 1  | 0 | 0  | 0 | 0 | 0 | 0  | 0  |
| 0  | 0 | 0  | 0 | 0 | 0 | 0  | 0  |
| 0  | 0 | 0  | 0 | 0 | 0 | 0  | 0  |
| 0  | 0 | 0  | 0 | 0 | 0 | 0  | 0  |
| 0  | 0 | 0  | 0 | 0 | 0 | 0  | 0  |
| 0  | 0 | 0  | 0 | 0 | 0 | 0  | 0  |
| 0  | 0 | 0  | 0 | 0 | 0 | 0  | 0  |
| 0  | 0 | 0  | 0 | 0 | 0 | 0  | 0  |
| 0  | 0 | 0  | 0 | 0 | 0 | 0  | 0  |
| 0  | 0 | 0  | 0 | 0 | 0 | 0  | 0  |
| 1  | 0 | 0  | 0 | 0 | 0 | 0  | 0  |
| 0  | 0 | 0  | 0 | 0 | 0 | 0  | 0  |
| 0  | 0 | 0  | 0 | 0 | 0 | 0  | 0  |
| 0  | 0 | 0  | 0 | 0 | 0 | 2  | 7  |
| 0  | 0 | 0  | 0 | 0 | 0 | 0  | 0  |
| 0  | 0 | 0  | 0 | 0 | 0 | 0  | 0  |
| 3  | 0 | 0  | 0 | 0 | 0 | 0  | 0  |
| 1  | 0 | 0  | 0 | 0 | 0 | 0  | 0  |
| 99 | 1 | 99 | 2 | 5 | 1 | 0  | 1  |



|   |   |   |   |    |    |   |   |
|---|---|---|---|----|----|---|---|
| 0 | 0 | 0 | 0 | 0  | 0  | 0 | 0 |
| 0 | 0 | 0 | 0 | 0  | 0  | 0 | 0 |
| 0 | 0 | 0 | 0 | 0  | 0  | 0 | 0 |
| 1 | 5 | 0 | 0 | 0  | 0  | 0 | 0 |
| 0 | 0 | 0 | 0 | 0  | 0  | 0 | 0 |
| 0 | 0 | 0 | 0 | 0  | 0  | 0 | 0 |
| 1 | 0 | 0 | 0 | 0  | 0  | 0 | 0 |
| 0 | 0 | 0 | 0 | 0  | 0  | 0 | 0 |
| 1 | 1 | 0 | 0 | 0  | 0  | 0 | 7 |
| 0 | 0 | 0 | 0 | 0  | 0  | 0 | 0 |
| 1 | 0 | 0 | 0 | 0  | 0  | 0 | 0 |
| 1 | 0 | 0 | 0 | 0  | 0  | 0 | 0 |
| 0 | 0 | 0 | 0 | 0  | 0  | 0 | 0 |
| 0 | 0 | 0 | 0 | 0  | 0  | 0 | 0 |
| 2 | 0 | 0 | 0 | 0  | 0  | 0 | 0 |
| 0 | 0 | 0 | 0 | 0  | 0  | 0 | 0 |
| 0 | 0 | 0 | 0 | 0  | 0  | 0 | 0 |
| 0 | 0 | 0 | 0 | 0  | 0  | 0 | 0 |
| 0 | 0 | 0 | 0 | 0  | 0  | 0 | 0 |
| 0 | 0 | 0 | 0 | 0  | 0  | 0 | 0 |
| 0 | 0 | 0 | 1 | 0  | 0  | 0 | 0 |
| 0 | 0 | 0 | 0 | 99 | 99 | 2 | 0 |
| 0 | 0 | 0 | 0 | 0  | 0  | 0 | 0 |
| 0 | 0 | 0 | 0 | 0  | 0  | 0 | 0 |
| 1 | 0 | 0 | 0 | 1  | 0  | 2 | 7 |
| 0 | 0 | 0 | 0 | 1  | 0  | 0 | 0 |
| 1 | 0 | 0 | 0 | 0  | 0  | 0 | 0 |
| 0 | 0 | 0 | 0 | 0  | 0  | 0 | 0 |
| 5 | 3 | 0 | 0 | 3  | 1  | 1 | 1 |
| 0 | 0 | 0 | 0 | 0  | 0  | 0 | 0 |
| 0 | 0 | 0 | 1 | 0  | 0  | 0 | 0 |
| 0 | 0 | 0 | 0 | 0  | 0  | 0 | 0 |
| 0 | 0 | 0 | 0 | 0  | 0  | 0 | 0 |
| 0 | 0 | 0 | 0 | 0  | 0  | 0 | 0 |
| 0 | 0 | 0 | 0 | 0  | 0  | 0 | 0 |
| 0 | 0 | 0 | 0 | 0  | 0  | 0 | 0 |
| 1 | 0 | 0 | 0 | 1  | 0  | 2 | 7 |
| 0 | 0 | 0 | 0 | 1  | 0  | 0 | 0 |
| 0 | 0 | 0 | 0 | 0  | 0  | 0 | 0 |
| 0 | 0 | 0 | 0 | 0  | 0  | 0 | 0 |
| 0 | 0 | 0 | 0 | 0  | 0  | 0 | 0 |
| 0 | 0 | 0 | 0 | 0  | 0  | 2 | 7 |
| 0 | 0 | 0 | 0 | 0  | 0  | 2 | 7 |
| 0 | 0 | 0 | 0 | 0  | 0  | 0 | 0 |
| 0 | 0 | 0 | 0 | 0  | 0  | 0 | 0 |
| 0 | 0 | 0 | 0 | 0  | 0  | 0 | 0 |
| 0 | 0 | 0 | 0 | 0  | 0  | 0 | 0 |
| 1 | 0 | 0 | 1 | 0  | 0  | 0 | 7 |
| 1 | 0 | 0 | 0 | 0  | 0  | 0 | 0 |

|   |   |   |   |   |   |    |    |
|---|---|---|---|---|---|----|----|
| 0 | 0 | 0 | 0 | 0 | 0 | 0  | 0  |
| 0 | 1 | 0 | 0 | 1 | 0 | 99 | 0  |
| 1 | 0 | 0 | 0 | 0 | 0 | 0  | 0  |
| 0 | 0 | 0 | 0 | 0 | 0 | 0  | 0  |
| 0 | 0 | 0 | 0 | 0 | 0 | 0  | 0  |
| 0 | 0 | 0 | 0 | 0 | 0 | 2  | 7  |
| 0 | 0 | 0 | 0 | 0 | 0 | 0  | 0  |
| 0 | 0 | 0 | 0 | 0 | 0 | 0  | 0  |
| 0 | 0 | 0 | 0 | 0 | 0 | 0  | 0  |
| 5 | 0 | 0 | 0 | 2 | 0 | 1  | 5  |
| 0 | 0 | 0 | 0 | 0 | 0 | 0  | 0  |
| 0 | 0 | 0 | 0 | 0 | 0 | 0  | 0  |
| 3 | 0 | 0 | 0 | 0 | 0 | 0  | 0  |
| 0 | 0 | 0 | 0 | 0 | 0 | 0  | 0  |
| 0 | 3 | 0 | 0 | 0 | 0 | 2  | 7  |
| 0 | 0 | 0 | 0 | 0 | 0 | 0  | 0  |
| 1 | 0 | 0 | 0 | 0 | 0 | 0  | 0  |
| 0 | 0 | 0 | 0 | 1 | 0 | 2  | 0  |
| 2 | 0 | 0 | 0 | 1 | 0 | 0  | 0  |
| 0 | 0 | 0 | 0 | 0 | 0 | 0  | 0  |
| 2 | 0 | 0 | 0 | 0 | 0 | 0  | 0  |
| 0 | 0 | 0 | 0 | 0 | 0 | 0  | 0  |
| 0 | 1 | 0 | 0 | 0 | 0 | 2  | 7  |
| 2 | 0 | 0 | 1 | 0 | 0 | 0  | 0  |
| 0 | 0 | 0 | 0 | 0 | 0 | 0  | 0  |
| 1 | 1 | 0 | 0 | 0 | 0 | 0  | 0  |
| 2 | 0 | 0 | 1 | 0 | 0 | 2  | 0  |
| 0 | 1 | 0 | 0 | 0 | 0 | 0  | 0  |
| 0 | 0 | 0 | 0 | 0 | 0 | 0  | 0  |
| 0 | 0 | 0 | 0 | 0 | 0 | 0  | 0  |
| 0 | 0 | 0 | 0 | 0 | 0 | 0  | 0  |
| 2 | 1 | 2 | 0 | 1 | 0 | 2  | 7  |
| 0 | 0 | 0 | 0 | 0 | 0 | 0  | 0  |
| 2 | 0 | 0 | 0 | 0 | 0 | 0  | 0  |
| 0 | 0 | 0 | 0 | 0 | 0 | 1  | 6  |
| 0 | 0 | 0 | 1 | 0 | 0 | 0  | 0  |
| 0 | 0 | 0 | 0 | 0 | 0 | 0  | 0  |
| 3 | 0 | 0 | 0 | 3 | 0 | 0  | 0  |
| 1 | 0 | 0 | 1 | 0 | 0 | 0  | 0  |
| 3 | 0 | 0 | 0 | 0 | 0 | 2  | 7  |
| 0 | 0 | 0 | 0 | 0 | 0 | 0  | 0  |
| 1 | 0 | 0 | 0 | 0 | 0 | 0  | 99 |
| 0 | 5 | 0 | 0 | 0 | 0 | 0  | 0  |
| 2 | 0 | 0 | 0 | 0 | 0 | 1  | 1  |
| 1 | 2 | 1 | 0 | 1 | 0 | 1  | 1  |
| 4 | 4 | 4 | 0 | 2 | 0 | 1  | 7  |
| 1 | 0 | 0 | 0 | 0 | 0 | 0  | 0  |
| 0 | 0 | 0 | 0 | 0 | 0 | 0  | 0  |



|    |    |    |    |    |    |    |    |
|----|----|----|----|----|----|----|----|
| 0  | 0  | 0  | 0  | 0  | 0  | 0  | 0  |
| 0  | 0  | 0  | 0  | 0  | 0  | 0  | 0  |
| 0  | 0  | 0  | 0  | 0  | 0  | 0  | 0  |
| 3  | 0  | 0  | 0  | 0  | 0  | 0  | 0  |
| 2  | 0  | 0  | 0  | 0  | 0  | 0  | 0  |
| 4  | 0  | 0  | 0  | 0  | 0  | 2  | 7  |
| 0  | 0  | 0  | 0  | 0  | 0  | 0  | 0  |
| 0  | 0  | 0  | 0  | 0  | 0  | 0  | 0  |
| 0  | 0  | 0  | 0  | 0  | 0  | 0  | 0  |
| 0  | 0  | 0  | 0  | 0  | 0  | 0  | 0  |
| 0  | 0  | 0  | 0  | 0  | 0  | 0  | 0  |
| 1  | 2  | 0  | 0  | 0  | 0  | 2  | 7  |
| 3  | 3  | 0  | 0  | 0  | 0  | 0  | 0  |
| 0  | 0  | 0  | 0  | 0  | 0  | 0  | 0  |
| 99 | 0  | 0  | 2  | 0  | 0  | 0  | 0  |
| 0  | 0  | 0  | 0  | 0  | 0  | 0  | 0  |
| 0  | 0  | 0  | 0  | 0  | 0  | 0  | 0  |
| 0  | 0  | 0  | 0  | 0  | 0  | 0  | 0  |
| 0  | 0  | 0  | 0  | 0  | 0  | 0  | 0  |
| 2  | 0  | 0  | 0  | 1  | 0  | 0  | 0  |
| 3  | 0  | 0  | 0  | 0  | 0  | 0  | 0  |
| 1  | 0  | 0  | 0  | 0  | 0  | 0  | 0  |
| 1  | 1  | 1  | 0  | 0  | 0  | 0  | 0  |
| 0  | 0  | 0  | 0  | 0  | 0  | 0  | 0  |
| 2  | 0  | 0  | 0  | 0  | 0  | 0  | 0  |
| 1  | 0  | 0  | 0  | 0  | 0  | 0  | 0  |
| 1  | 99 | 99 | 99 | 99 | 99 | 99 | 99 |
| 0  | 0  | 0  | 0  | 0  | 0  | 0  | 0  |
| 0  | 0  | 0  | 0  | 0  | 0  | 0  | 0  |
| 0  | 0  | 0  | 0  | 0  | 0  | 0  | 0  |
| 1  | 0  | 0  | 0  | 0  | 0  | 0  | 0  |
| 0  | 0  | 0  | 0  | 0  | 0  | 2  | 0  |
| 0  | 0  | 0  | 0  | 0  | 0  | 0  | 0  |
| 1  | 0  | 0  | 0  | 0  | 0  | 2  | 7  |
| 0  | 0  | 0  | 0  | 0  | 0  | 0  | 0  |
| 0  | 0  | 0  | 0  | 0  | 0  | 0  | 0  |
| 0  | 0  | 0  | 0  | 0  | 0  | 0  | 0  |
| 0  | 0  | 0  | 0  | 0  | 0  | 0  | 0  |
| 0  | 0  | 0  | 0  | 0  | 0  | 0  | 0  |
| 0  | 0  | 0  | 0  | 0  | 0  | 0  | 0  |
| 1  | 0  | 0  | 0  | 0  | 0  | 0  | 0  |
| 0  | 0  | 0  | 0  | 0  | 0  | 0  | 0  |
| 0  | 0  | 0  | 0  | 0  | 0  | 2  | 7  |
| 0  | 0  | 0  | 0  | 0  | 0  | 0  | 0  |
| 0  | 0  | 0  | 0  | 0  | 0  | 0  | 0  |
| 0  | 0  | 0  | 0  | 0  | 1  | 0  | 0  |
| 0  | 0  | 0  | 0  | 0  | 0  | 0  | 0  |
| 0  | 0  | 0  | 0  | 0  | 0  | 0  | 0  |

|    |    |    |    |    |    |    |    |
|----|----|----|----|----|----|----|----|
| 0  | 0  | 0  | 0  | 0  | 0  | 0  | 0  |
| 0  | 0  | 0  | 0  | 0  | 0  | 0  | 0  |
| 0  | 0  | 0  | 0  | 0  | 0  | 0  | 0  |
| 1  | 0  | 0  | 0  | 0  | 0  | 0  | 0  |
| 0  | 0  | 0  | 0  | 0  | 0  | 0  | 0  |
| 0  | 0  | 0  | 0  | 0  | 0  | 0  | 0  |
| 0  | 0  | 0  | 0  | 0  | 0  | 0  | 7  |
| 0  | 0  | 0  | 0  | 0  | 0  | 0  | 0  |
| 0  | 0  | 0  | 0  | 0  | 0  | 0  | 0  |
| 1  | 0  | 0  | 0  | 0  | 0  | 2  | 7  |
| 0  | 0  | 0  | 0  | 0  | 0  | 0  | 0  |
| 0  | 0  | 0  | 0  | 0  | 0  | 0  | 0  |
| 0  | 0  | 0  | 0  | 0  | 0  | 0  | 0  |
| 0  | 0  | 0  | 0  | 0  | 0  | 0  | 0  |
| 0  | 0  | 0  | 0  | 0  | 0  | 0  | 0  |
| 1  | 0  | 0  | 0  | 2  | 0  | 0  | 0  |
| 0  | 0  | 0  | 0  | 0  | 0  | 0  | 0  |
| 0  | 0  | 0  | 0  | 0  | 0  | 0  | 0  |
| 0  | 0  | 0  | 0  | 0  | 0  | 0  | 0  |
| 1  | 0  | 0  | 0  | 0  | 0  | 0  | 0  |
| 0  | 0  | 0  | 0  | 0  | 0  | 0  | 0  |
| 0  | 0  | 0  | 0  | 0  | 0  | 0  | 0  |
| 0  | 0  | 0  | 0  | 0  | 0  | 0  | 0  |
| 1  | 0  | 0  | 0  | 0  | 0  | 0  | 0  |
| 0  | 0  | 0  | 0  | 0  | 0  | 0  | 0  |
| 0  | 0  | 0  | 0  | 0  | 0  | 0  | 0  |
| 1  | 0  | 0  | 0  | 0  | 0  | 0  | 0  |
| 0  | 0  | 0  | 0  | 0  | 0  | 0  | 0  |
| 0  | 0  | 0  | 0  | 0  | 0  | 0  | 0  |
| 0  | 0  | 0  | 0  | 0  | 0  | 0  | 0  |
| 2  | 5  | 0  | 0  | 0  | 0  | 0  | 0  |
| 0  | 0  | 0  | 0  | 0  | 0  | 0  | 0  |
| 0  | 0  | 0  | 0  | 0  | 0  | 2  | 0  |
| 99 | 99 | 99 | 99 | 99 | 99 | 99 | 99 |
| 0  | 0  | 0  | 0  | 0  | 0  | 0  | 0  |
| 1  | 0  | 0  | 0  | 0  | 0  | 0  | 0  |
| 0  | 0  | 0  | 0  | 0  | 0  | 0  | 0  |
| 4  | 1  | 0  | 0  | 0  | 0  | 0  | 0  |
| 2  | 0  | 0  | 0  | 0  | 0  | 0  | 0  |
| 0  | 0  | 0  | 0  | 0  | 0  | 0  | 0  |
| 1  | 0  | 0  | 0  | 0  | 0  | 0  | 0  |
| 0  | 0  | 0  | 0  | 0  | 0  | 0  | 0  |
| 0  | 0  | 0  | 0  | 0  | 0  | 0  | 0  |
| 0  | 0  | 0  | 0  | 0  | 0  | 0  | 0  |
| 0  | 0  | 0  | 0  | 0  | 0  | 0  | 0  |
| 0  | 0  | 0  | 0  | 0  | 0  | 0  | 0  |
| 0  | 0  | 0  | 0  | 0  | 0  | 0  | 0  |
| 0  | 0  | 0  | 0  | 0  | 0  | 2  | 7  |
| 0  | 0  | 0  | 0  | 0  | 0  | 0  | 0  |
| 2  | 3  | 2  | 1  | 0  | 0  | 0  | 0  |

|    |    |    |    |    |    |    |    |
|----|----|----|----|----|----|----|----|
| 0  | 0  | 0  | 0  | 0  | 0  | 0  | 0  |
| 0  | 0  | 0  | 0  | 0  | 0  | 0  | 0  |
| 1  | 0  | 0  | 0  | 0  | 0  | 0  | 0  |
| 2  | 1  | 0  | 1  | 1  | 2  | 0  | 0  |
| 0  | 0  | 0  | 0  | 0  | 0  | 0  | 0  |
| 1  | 0  | 0  | 1  | 0  | 1  | 2  | 7  |
| 0  | 0  | 0  | 0  | 0  | 0  | 0  | 0  |
| 0  | 0  | 0  | 0  | 0  | 0  | 0  | 0  |
| 1  | 0  | 0  | 0  | 0  | 0  | 0  | 0  |
| 5  | 1  | 0  | 1  | 0  | 0  | 0  | 0  |
| 99 | 3  | 2  | 1  | 0  | 0  | 2  | 7  |
| 0  | 0  | 0  | 0  | 0  | 0  | 0  | 0  |
| 0  | 0  | 0  | 0  | 0  | 0  | 0  | 0  |
| 99 | 99 | 99 | 99 | 99 | 99 | 99 | 99 |
| 1  | 0  | 0  | 0  | 0  | 0  | 0  | 0  |
| 1  | 1  | 0  | 0  | 0  | 0  | 0  | 3  |
| 2  | 1  | 0  | 2  | 0  | 0  | 0  | 0  |
| 3  | 4  | 1  | 0  | 0  | 0  | 1  | 5  |
| 5  | 5  | 0  | 0  | 0  | 0  | 1  | 2  |
| 2  | 0  | 0  | 0  | 0  | 0  | 0  | 0  |
| 0  | 0  | 0  | 0  | 0  | 0  | 0  | 0  |
| 0  | 0  | 0  | 0  | 0  | 0  | 0  | 0  |
| 0  | 0  | 0  | 0  | 0  | 0  | 0  | 0  |
| 0  | 0  | 0  | 0  | 0  | 0  | 0  | 0  |
| 1  | 0  | 0  | 0  | 0  | 0  | 0  | 0  |
| 1  | 0  | 0  | 0  | 0  | 0  | 0  | 0  |
| 0  | 0  | 0  | 0  | 0  | 0  | 0  | 0  |
| 1  | 0  | 0  | 0  | 0  | 0  | 2  | 7  |
| 0  | 0  | 0  | 0  | 0  | 0  | 0  | 0  |
| 1  | 0  | 0  | 0  | 0  | 0  | 0  | 0  |
| 2  | 1  | 0  | 2  | 0  | 0  | 0  | 0  |
| 1  | 1  | 1  | 0  | 0  | 0  | 0  | 0  |
| 0  | 0  | 0  | 0  | 0  | 0  | 0  | 0  |
| 5  | 0  | 0  | 0  | 2  | 0  | 0  | 0  |
| 2  | 0  | 0  | 1  | 0  | 0  | 0  | 0  |
| 0  | 0  | 0  | 0  | 0  | 0  | 0  | 0  |
| 0  | 0  | 0  | 0  | 0  | 0  | 0  | 0  |
| 1  | 0  | 0  | 0  | 0  | 0  | 0  | 0  |
| 0  | 0  | 0  | 0  | 0  | 0  | 0  | 0  |
| 1  | 0  | 0  | 0  | 0  | 0  | 0  | 0  |
| 3  | 0  | 0  | 0  | 1  | 0  | 0  | 0  |
| 0  | 0  | 0  | 0  | 0  | 0  | 0  | 0  |
| 0  | 0  | 0  | 0  | 0  | 0  | 0  | 0  |
| 0  | 0  | 0  | 0  | 0  | 0  | 0  | 0  |
| 0  | 0  | 0  | 0  | 0  | 0  | 0  | 0  |
| 0  | 0  | 0  | 0  | 0  | 0  | 0  | 0  |
| 0  | 0  | 0  | 0  | 0  | 0  | 0  | 0  |
| 0  | 0  | 0  | 0  | 0  | 0  | 0  | 0  |
| 0  | 0  | 0  | 0  | 1  | 0  | 0  | 0  |

|    |    |    |    |    |    |    |    |
|----|----|----|----|----|----|----|----|
| 0  | 0  | 0  | 0  | 0  | 0  | 0  | 7  |
| 0  | 0  | 0  | 0  | 0  | 0  | 0  | 0  |
| 2  | 0  | 0  | 0  | 0  | 0  | 0  | 0  |
| 0  | 0  | 0  | 0  | 0  | 0  | 2  | 7  |
| 3  | 0  | 0  | 0  | 0  | 0  | 0  | 7  |
| 1  | 0  | 0  | 0  | 0  | 0  | 2  | 0  |
| 0  | 0  | 0  | 0  | 0  | 0  | 0  | 0  |
| 0  | 0  | 0  | 1  | 0  | 0  | 2  | 7  |
| 0  | 0  | 0  | 0  | 0  | 0  | 2  | 0  |
| 0  | 0  | 0  | 0  | 0  | 0  | 0  | 0  |
| 1  | 0  | 0  | 0  | 1  | 0  | 0  | 0  |
| 1  | 0  | 0  | 0  | 0  | 0  | 0  | 0  |
| 1  | 0  | 0  | 0  | 0  | 0  | 0  | 0  |
| 0  | 0  | 0  | 0  | 0  | 0  | 0  | 0  |
| 99 | 99 | 99 | 99 | 99 | 99 | 0  | 0  |
| 0  | 0  | 0  | 0  | 0  | 0  | 0  | 0  |
| 1  | 2  | 0  | 0  | 1  | 0  | 0  | 0  |
| 1  | 0  | 0  | 0  | 0  | 0  | 0  | 0  |
| 0  | 0  | 0  | 0  | 0  | 0  | 0  | 0  |
| 99 | 99 | 99 | 99 | 99 | 99 | 99 | 99 |
| 2  | 1  | 0  | 0  | 0  | 0  | 0  | 0  |
| 1  | 0  | 0  | 0  | 0  | 0  | 0  | 0  |
| 2  | 0  | 0  | 1  | 0  | 0  | 0  | 0  |
| 2  | 0  | 0  | 0  | 5  | 0  | 0  | 0  |
| 0  | 0  | 0  | 0  | 0  | 0  | 0  | 0  |
| 0  | 0  | 0  | 0  | 0  | 0  | 0  | 0  |
| 1  | 2  | 0  | 0  | 1  | 0  | 0  | 0  |
| 0  | 0  | 0  | 0  | 0  | 0  | 0  | 0  |
| 0  | 0  | 0  | 0  | 0  | 0  | 0  | 0  |
| 0  | 0  | 0  | 0  | 0  | 0  | 0  | 0  |
| 2  | 0  | 0  | 0  | 0  | 0  | 0  | 0  |
| 1  | 0  | 0  | 0  | 0  | 0  | 0  | 0  |
| 0  | 0  | 0  | 0  | 0  | 0  | 0  | 0  |
| 1  | 0  | 0  | 0  | 0  | 0  | 0  | 0  |
| 1  | 0  | 0  | 0  | 0  | 0  | 2  | 7  |
| 3  | 0  | 0  | 0  | 0  | 0  | 0  | 0  |
| 0  | 0  | 0  | 0  | 0  | 0  | 0  | 0  |
| 0  | 0  | 0  | 0  | 0  | 0  | 0  | 0  |
| 0  | 0  | 0  | 0  | 0  | 0  | 0  | 7  |
| 0  | 0  | 0  | 0  | 0  | 0  | 0  | 0  |
| 0  | 0  | 0  | 0  | 99 | 0  | 0  | 0  |
| 1  | 0  | 0  | 0  | 0  | 0  | 0  | 0  |
| 0  | 0  | 0  | 0  | 0  | 0  | 0  | 0  |
| 0  | 0  | 0  | 0  | 0  | 0  | 0  | 0  |
| 1  | 0  | 0  | 0  | 0  | 0  | 0  | 0  |
| 0  | 0  | 0  | 0  | 0  | 0  | 99 | 99 |
| 3  | 0  | 0  | 2  | 1  | 0  | 0  | 0  |

|   |   |    |   |   |   |   |    |
|---|---|----|---|---|---|---|----|
| 0 | 0 | 0  | 0 | 0 | 0 | 0 | 0  |
| 0 | 0 | 0  | 0 | 0 | 0 | 0 | 0  |
| 0 | 0 | 0  | 0 | 0 | 0 | 0 | 0  |
| 1 | 0 | 0  | 0 | 0 | 0 | 0 | 0  |
| 0 | 0 | 0  | 0 | 0 | 0 | 0 | 0  |
| 1 | 0 | 0  | 3 | 0 | 0 | 2 | 7  |
| 0 | 0 | 0  | 0 | 1 | 0 | 0 | 0  |
| 0 | 0 | 0  | 0 | 0 | 0 | 0 | 0  |
| 0 | 0 | 0  | 0 | 0 | 0 | 0 | 0  |
| 3 | 0 | 0  | 3 | 0 | 0 | 0 | 0  |
| 5 | 4 | 5  | 0 | 1 | 0 | 1 | 1  |
| 0 | 0 | 0  | 0 | 0 | 0 | 0 | 99 |
| 1 | 3 | 0  | 0 | 0 | 0 | 0 | 0  |
| 0 | 0 | 0  | 0 | 0 | 0 | 0 | 0  |
| 3 | 3 | 0  | 0 | 0 | 0 | 0 | 0  |
| 1 | 0 | 0  | 0 | 0 | 0 | 0 | 0  |
| 0 | 0 | 0  | 0 | 0 | 0 | 0 | 0  |
| 1 | 0 | 0  | 0 | 0 | 0 | 0 | 0  |
| 1 | 0 | 0  | 0 | 0 | 0 | 0 | 0  |
| 0 | 0 | 0  | 0 | 0 | 0 | 0 | 0  |
| 0 | 0 | 0  | 0 | 0 | 0 | 0 | 0  |
| 0 | 0 | 0  | 0 | 0 | 0 | 0 | 0  |
| 3 | 0 | 0  | 0 | 0 | 0 | 0 | 7  |
| 1 | 0 | 0  | 0 | 0 | 0 | 0 | 0  |
| 0 | 0 | 0  | 0 | 0 | 0 | 0 | 0  |
| 0 | 0 | 0  | 0 | 0 | 0 | 0 | 0  |
| 0 | 0 | 0  | 0 | 0 | 0 | 0 | 0  |
| 1 | 0 | 0  | 0 | 0 | 0 | 0 | 0  |
| 0 | 0 | 0  | 0 | 0 | 0 | 0 | 0  |
| 2 | 2 | 99 | 0 | 0 | 0 | 0 | 0  |
| 2 | 0 | 0  | 0 | 0 | 0 | 0 | 0  |
| 0 | 0 | 0  | 0 | 0 | 0 | 0 | 0  |
| 1 | 0 | 0  | 1 | 1 | 0 | 0 | 0  |
| 0 | 0 | 0  | 0 | 0 | 0 | 0 | 0  |
| 0 | 0 | 0  | 0 | 0 | 0 | 0 | 0  |
| 5 | 5 | 5  | 0 | 0 | 2 | 1 | 4  |
| 0 | 0 | 0  | 0 | 0 | 0 | 0 | 0  |
| 0 | 0 | 0  | 0 | 0 | 0 | 0 | 0  |
| 2 | 1 | 1  | 1 | 0 | 0 | 0 | 0  |
| 5 | 5 | 5  | 5 | 5 | 5 | 1 | 6  |
| 1 | 0 | 0  | 0 | 0 | 0 | 0 | 0  |
| 5 | 5 | 5  | 5 | 5 | 5 | 0 | 6  |
| 0 | 0 | 0  | 0 | 0 | 0 | 0 | 0  |
| 1 | 0 | 0  | 0 | 0 | 0 | 0 | 0  |
| 1 | 0 | 0  | 0 | 0 | 0 | 0 | 0  |
| 2 | 0 | 0  | 0 | 0 | 0 | 0 | 0  |
| 0 | 0 | 0  | 0 | 0 | 0 | 0 | 0  |
| 1 | 0 | 0  | 0 | 0 | 0 | 0 | 0  |

|   |   |   |   |   |   |    |    |
|---|---|---|---|---|---|----|----|
| 3 | 1 | 0 | 0 | 0 | 0 | 0  | 0  |
| 0 | 0 | 0 | 0 | 0 | 0 | 0  | 0  |
| 0 | 0 | 0 | 0 | 0 | 0 | 0  | 0  |
| 0 | 0 | 0 | 0 | 0 | 0 | 0  | 0  |
| 1 | 0 | 0 | 0 | 0 | 0 | 0  | 0  |
| 0 | 0 | 0 | 0 | 0 | 0 | 0  | 0  |
| 0 | 0 | 0 | 0 | 0 | 0 | 2  | 0  |
| 1 | 0 | 0 | 0 | 0 | 0 | 0  | 0  |
| 1 | 0 | 0 | 0 | 0 | 0 | 0  | 0  |
| 2 | 1 | 0 | 0 | 1 | 0 | 0  | 0  |
| 1 | 0 | 0 | 0 | 0 | 0 | 0  | 0  |
| 0 | 0 | 0 | 0 | 0 | 0 | 0  | 0  |
| 0 | 0 | 0 | 0 | 0 | 0 | 0  | 0  |
| 1 | 0 | 0 | 0 | 0 | 0 | 0  | 0  |
| 0 | 0 | 0 | 0 | 0 | 0 | 99 | 99 |
| 0 | 0 | 0 | 0 | 0 | 0 | 99 | 99 |
| 0 | 0 | 0 | 0 | 0 | 0 | 0  | 0  |
| 1 | 0 | 0 | 0 | 0 | 0 | 0  | 0  |
| 0 | 0 | 0 | 0 | 0 | 0 | 0  | 0  |
| 0 | 0 | 0 | 0 | 0 | 0 | 0  | 0  |
| 0 | 0 | 0 | 0 | 0 | 0 | 0  | 0  |
| 2 | 0 | 0 | 0 | 0 | 0 | 0  | 0  |
| 0 | 0 | 0 | 0 | 0 | 0 | 0  | 0  |
| 5 | 0 | 0 | 2 | 1 | 0 | 0  | 0  |
| 0 | 0 | 0 | 0 | 0 | 0 | 0  | 0  |
| 1 | 0 | 0 | 0 | 1 | 0 | 0  | 0  |
| 0 | 0 | 0 | 0 | 0 | 0 | 0  | 0  |
| 0 | 0 | 0 | 0 | 0 | 0 | 2  | 0  |
| 0 | 0 | 0 | 0 | 0 | 0 | 0  | 0  |
| 0 | 0 | 0 | 0 | 0 | 0 | 0  | 0  |
| 1 | 0 | 0 | 0 | 0 | 0 | 0  | 0  |
| 1 | 1 | 0 | 1 | 0 | 0 | 0  | 0  |
| 0 | 0 | 0 | 0 | 0 | 0 | 0  | 0  |
| 1 | 0 | 0 | 0 | 0 | 0 | 0  | 0  |
| 4 | 1 | 0 | 0 | 0 | 0 | 0  | 0  |
| 0 | 0 | 0 | 0 | 1 | 0 | 0  | 0  |
| 0 | 0 | 0 | 0 | 0 | 0 | 99 | 99 |
| 0 | 0 | 0 | 0 | 0 | 0 | 0  | 0  |
| 1 | 1 | 0 | 0 | 0 | 0 | 0  | 0  |
| 0 | 0 | 0 | 0 | 0 | 0 | 0  | 0  |
| 0 | 0 | 0 | 0 | 0 | 0 | 0  | 0  |
| 1 | 0 | 0 | 0 | 0 | 0 | 0  | 0  |
| 1 | 0 | 0 | 0 | 1 | 0 | 0  | 0  |
| 0 | 0 | 0 | 0 | 0 | 0 | 0  | 0  |
| 0 | 0 | 0 | 0 | 0 | 0 | 0  | 0  |
| 1 | 0 | 0 | 1 | 0 | 0 | 0  | 0  |
| 1 | 0 | 0 | 0 | 0 | 0 | 0  | 0  |
| 1 | 0 | 0 | 0 | 0 | 0 | 0  | 0  |

|    |    |    |    |    |    |    |    |
|----|----|----|----|----|----|----|----|
| 2  | 1  | 0  | 0  | 0  | 0  | 0  | 0  |
| 0  | 0  | 0  | 0  | 0  | 0  | 0  | 0  |
| 3  | 2  | 1  | 0  | 0  | 0  | 0  | 0  |
| 0  | 0  | 0  | 0  | 0  | 0  | 0  | 0  |
| 0  | 0  | 0  | 0  | 0  | 0  | 0  | 0  |
| 0  | 0  | 0  | 0  | 0  | 0  | 0  | 0  |
| 1  | 1  | 0  | 0  | 0  | 0  | 0  | 0  |
| 3  | 3  | 0  | 0  | 0  | 0  | 0  | 0  |
| 1  | 0  | 0  | 0  | 0  | 0  | 0  | 0  |
| 0  | 0  | 0  | 0  | 0  | 0  | 0  | 0  |
| 0  | 0  | 0  | 0  | 0  | 0  | 0  | 0  |
| 1  | 0  | 0  | 0  | 0  | 0  | 2  | 7  |
| 4  | 0  | 0  | 0  | 0  | 0  | 0  | 0  |
| 0  | 0  | 0  | 0  | 0  | 0  | 1  | 1  |
| 0  | 0  | 0  | 0  | 0  | 0  | 0  | 0  |
| 0  | 0  | 0  | 0  | 0  | 0  | 0  | 0  |
| 1  | 0  | 0  | 0  | 0  | 0  | 2  | 7  |
| 0  | 0  | 0  | 0  | 0  | 0  | 0  | 0  |
| 0  | 0  | 0  | 0  | 0  | 0  | 0  | 0  |
| 0  | 0  | 0  | 0  | 0  | 0  | 0  | 0  |
| 1  | 0  | 0  | 0  | 0  | 0  | 0  | 0  |
| 1  | 0  | 0  | 0  | 0  | 0  | 0  | 0  |
| 4  | 5  | 1  | 2  | 0  | 5  | 1  | 6  |
| 1  | 0  | 0  | 0  | 0  | 0  | 0  | 0  |
| 0  | 0  | 0  | 0  | 0  | 0  | 0  | 0  |
| 2  | 3  | 0  | 0  | 0  | 0  | 0  | 0  |
| 0  | 0  | 0  | 0  | 0  | 0  | 0  | 0  |
| 2  | 0  | 0  | 0  | 0  | 0  | 0  | 0  |
| 0  | 0  | 0  | 0  | 0  | 0  | 2  | 7  |
| 0  | 0  | 0  | 0  | 0  | 0  | 2  | 0  |
| 0  | 0  | 0  | 0  | 0  | 0  | 0  | 0  |
| 0  | 0  | 0  | 0  | 0  | 0  | 0  | 0  |
| 0  | 0  | 0  | 0  | 0  | 0  | 0  | 0  |
| 99 | 99 | 99 | 99 | 99 | 99 | 99 | 99 |
| 0  | 0  | 0  | 0  | 0  | 0  | 0  | 0  |
| 0  | 0  | 0  | 0  | 0  | 0  | 0  | 0  |
| 0  | 0  | 0  | 0  | 0  | 0  | 0  | 0  |
| 0  | 0  | 0  | 0  | 0  | 0  | 0  | 0  |
| 1  | 0  | 0  | 0  | 0  | 0  | 0  | 0  |
| 0  | 0  | 0  | 0  | 0  | 0  | 0  | 0  |
| 1  | 0  | 0  | 0  | 0  | 0  | 0  | 0  |
| 1  | 0  | 0  | 0  | 0  | 0  | 2  | 7  |
| 0  | 0  | 0  | 0  | 0  | 0  | 0  | 0  |
| 1  | 0  | 0  | 0  | 0  | 0  | 0  | 0  |

|   |   |   |   |   |   |    |    |
|---|---|---|---|---|---|----|----|
| 0 | 0 | 0 | 0 | 0 | 0 | 0  | 0  |
| 5 | 0 | 0 | 0 | 0 | 0 | 0  | 0  |
| 2 | 0 | 0 | 1 | 0 | 0 | 0  | 0  |
| 0 | 0 | 0 | 0 | 0 | 0 | 0  | 0  |
| 0 | 0 | 0 | 0 | 0 | 0 | 0  | 0  |
| 0 | 0 | 0 | 0 | 0 | 0 | 0  | 0  |
| 0 | 0 | 0 | 0 | 0 | 0 | 2  | 7  |
| 0 | 0 | 0 | 0 | 0 | 0 | 0  | 0  |
| 1 | 0 | 0 | 0 | 0 | 0 | 0  | 0  |
| 0 | 0 | 0 | 0 | 0 | 0 | 0  | 0  |
| 0 | 0 | 0 | 0 | 0 | 0 | 0  | 0  |
| 0 | 0 | 0 | 0 | 0 | 0 | 0  | 0  |
| 0 | 0 | 0 | 0 | 0 | 0 | 2  | 0  |
| 0 | 0 | 0 | 0 | 0 | 0 | 0  | 0  |
| 0 | 0 | 0 | 0 | 0 | 0 | 0  | 0  |
| 0 | 0 | 0 | 0 | 0 | 0 | 0  | 0  |
| 0 | 0 | 0 | 0 | 0 | 0 | 0  | 0  |
| 0 | 0 | 0 | 0 | 0 | 0 | 0  | 0  |
| 0 | 0 | 0 | 0 | 0 | 0 | 0  | 0  |
| 0 | 0 | 0 | 0 | 0 | 0 | 0  | 0  |
| 0 | 0 | 0 | 0 | 0 | 0 | 99 | 99 |
| 1 | 0 | 0 | 0 | 0 | 0 | 99 | 0  |
| 0 | 0 | 0 | 0 | 0 | 0 | 0  | 0  |
| 0 | 0 | 0 | 0 | 0 | 0 | 0  | 0  |
| 0 | 0 | 0 | 0 | 0 | 0 | 0  | 0  |
| 0 | 0 | 0 | 0 | 0 | 0 | 0  | 0  |
| 0 | 0 | 0 | 0 | 0 | 0 | 2  | 0  |
| 0 | 0 | 0 | 0 | 0 | 0 | 0  | 0  |
| 0 | 0 | 0 | 0 | 0 | 0 | 0  | 0  |
| 0 | 0 | 0 | 0 | 0 | 0 | 0  | 0  |
| 0 | 0 | 0 | 0 | 0 | 0 | 0  | 0  |
| 0 | 0 | 0 | 0 | 0 | 0 | 0  | 0  |
| 0 | 0 | 0 | 0 | 0 | 0 | 0  | 0  |
| 0 | 0 | 0 | 0 | 0 | 0 | 0  | 0  |
| 0 | 0 | 0 | 0 | 0 | 0 | 0  | 0  |
| 0 | 0 | 0 | 0 | 0 | 0 | 0  | 0  |
| 0 | 0 | 0 | 0 | 0 | 0 | 2  | 7  |
| 0 | 0 | 0 | 0 | 0 | 0 | 0  | 0  |
| 0 | 0 | 0 | 0 | 0 | 0 | 0  | 0  |
| 0 | 0 | 0 | 0 | 0 | 0 | 0  | 0  |
| 0 | 0 | 0 | 0 | 0 | 0 | 0  | 0  |
| 0 | 0 | 0 | 0 | 0 | 0 | 0  | 0  |
| 0 | 0 | 0 | 0 | 0 | 0 | 0  | 0  |
| 0 | 0 | 0 | 0 | 0 | 0 | 0  | 0  |
| 0 | 0 | 0 | 0 | 0 | 0 | 0  | 0  |
| 0 | 0 | 0 | 0 | 0 | 0 | 0  | 0  |
| 1 | 0 | 0 | 0 | 0 | 0 | 0  | 0  |
| 0 | 0 | 0 | 0 | 0 | 0 | 0  | 0  |



|    |    |    |    |    |    |    |    |
|----|----|----|----|----|----|----|----|
| 0  | 0  | 0  | 0  | 0  | 0  | 0  | 0  |
| 0  | 0  | 0  | 0  | 0  | 0  | 0  | 0  |
| 0  | 0  | 0  | 0  | 0  | 0  | 0  | 0  |
| 0  | 0  | 0  | 0  | 0  | 0  | 0  | 0  |
| 1  | 0  | 0  | 0  | 0  | 0  | 0  | 0  |
| 0  | 0  | 0  | 0  | 0  | 0  | 0  | 0  |
| 0  | 0  | 0  | 0  | 0  | 0  | 0  | 0  |
| 1  | 0  | 0  | 0  | 0  | 0  | 0  | 0  |
| 0  | 0  | 0  | 0  | 0  | 0  | 0  | 0  |
| 0  | 0  | 0  | 0  | 0  | 0  | 0  | 0  |
| 1  | 0  | 0  | 0  | 0  | 0  | 0  | 0  |
| 0  | 0  | 0  | 0  | 0  | 0  | 0  | 0  |
| 0  | 0  | 0  | 0  | 0  | 0  | 0  | 0  |
| 1  | 0  | 0  | 0  | 0  | 0  | 0  | 0  |
| 1  | 0  | 0  | 0  | 0  | 0  | 0  | 0  |
| 0  | 0  | 0  | 0  | 0  | 0  | 0  | 0  |
| 2  | 0  | 0  | 1  | 0  | 0  | 0  | 0  |
| 1  | 0  | 0  | 0  | 0  | 0  | 0  | 0  |
| 0  | 0  | 0  | 0  | 0  | 0  | 0  | 0  |
| 0  | 0  | 0  | 0  | 0  | 0  | 0  | 0  |
| 0  | 0  | 0  | 1  | 0  | 0  | 0  | 0  |
| 0  | 0  | 0  | 1  | 0  | 0  | 0  | 0  |
| 0  | 0  | 0  | 0  | 0  | 0  | 0  | 0  |
| 0  | 0  | 0  | 0  | 0  | 0  | 0  | 0  |
| 0  | 0  | 0  | 0  | 0  | 0  | 2  | 0  |
| 0  | 0  | 0  | 99 | 0  | 0  | 0  | 0  |
| 1  | 0  | 0  | 0  | 0  | 0  | 0  | 0  |
| 0  | 0  | 0  | 0  | 0  | 0  | 0  | 0  |
| 1  | 0  | 0  | 0  | 0  | 0  | 0  | 0  |
| 2  | 0  | 0  | 0  | 0  | 0  | 0  | 0  |
| 0  | 0  | 0  | 0  | 0  | 0  | 0  | 0  |
| 0  | 0  | 0  | 0  | 0  | 0  | 0  | 0  |
| 0  | 0  | 0  | 0  | 0  | 0  | 0  | 0  |
| 0  | 0  | 0  | 0  | 0  | 0  | 0  | 0  |
| 99 | 99 | 99 | 99 | 99 | 99 | 99 | 99 |
| 0  | 0  | 0  | 0  | 0  | 0  | 0  | 0  |
| 0  | 0  | 0  | 0  | 0  | 0  | 0  | 0  |
| 0  | 0  | 0  | 0  | 0  | 0  | 0  | 0  |
| 1  | 0  | 0  | 1  | 0  | 0  | 0  | 0  |
| 0  | 0  | 0  | 0  | 0  | 0  | 0  | 0  |
| 99 | 0  | 0  | 0  | 0  | 0  | 0  | 0  |
| 0  | 0  | 0  | 0  | 0  | 0  | 2  | 7  |
| 0  | 0  | 0  | 0  | 0  | 0  | 0  | 0  |
| 0  | 0  | 0  | 0  | 0  | 0  | 0  | 0  |
| 0  | 0  | 0  | 1  | 0  | 0  | 2  | 0  |
| 0  | 0  | 0  | 0  | 0  | 0  | 0  | 0  |

|    |    |    |    |    |    |    |    |
|----|----|----|----|----|----|----|----|
| 0  | 0  | 0  | 0  | 0  | 0  | 0  | 0  |
| 0  | 0  | 0  | 0  | 0  | 0  | 0  | 0  |
| 0  | 0  | 0  | 0  | 0  | 0  | 0  | 0  |
| 0  | 0  | 0  | 0  | 0  | 0  | 0  | 0  |
| 0  | 0  | 0  | 0  | 0  | 0  | 2  | 2  |
| 0  | 0  | 0  | 0  | 0  | 0  | 0  | 0  |
| 0  | 0  | 0  | 0  | 0  | 0  | 2  | 7  |
| 0  | 0  | 0  | 0  | 0  | 0  | 0  | 0  |
| 0  | 0  | 0  | 0  | 0  | 0  | 0  | 0  |
| 1  | 0  | 0  | 0  | 0  | 0  | 2  | 0  |
| 0  | 0  | 0  | 0  | 0  | 0  | 0  | 0  |
| 0  | 0  | 0  | 0  | 0  | 0  | 0  | 0  |
| 0  | 0  | 0  | 0  | 0  | 0  | 0  | 0  |
| 0  | 0  | 0  | 0  | 0  | 0  | 0  | 0  |
| 0  | 0  | 0  | 0  | 0  | 0  | 0  | 0  |
| 0  | 0  | 0  | 0  | 0  | 0  | 0  | 0  |
| 0  | 0  | 0  | 0  | 0  | 0  | 0  | 0  |
| 0  | 0  | 0  | 0  | 0  | 0  | 0  | 0  |
| 0  | 0  | 0  | 0  | 0  | 0  | 0  | 0  |
| 0  | 0  | 0  | 0  | 0  | 0  | 0  | 0  |
| 0  | 0  | 0  | 0  | 0  | 0  | 0  | 0  |
| 0  | 0  | 0  | 0  | 0  | 0  | 0  | 0  |
| 0  | 0  | 0  | 0  | 0  | 0  | 0  | 0  |
| 0  | 0  | 0  | 0  | 0  | 0  | 0  | 0  |
| 0  | 0  | 0  | 0  | 0  | 0  | 0  | 0  |
| 2  | 0  | 0  | 0  | 1  | 0  | 0  | 0  |
| 0  | 0  | 0  | 0  | 0  | 0  | 0  | 0  |
| 0  | 0  | 0  | 0  | 0  | 0  | 0  | 0  |
| 0  | 0  | 0  | 0  | 0  | 0  | 0  | 0  |
| 0  | 0  | 0  | 0  | 0  | 0  | 0  | 0  |
| 0  | 0  | 0  | 0  | 0  | 0  | 0  | 0  |
| 0  | 0  | 0  | 0  | 0  | 0  | 0  | 0  |
| 0  | 0  | 0  | 0  | 0  | 0  | 0  | 0  |
| 0  | 0  | 0  | 0  | 0  | 0  | 0  | 0  |
| 0  | 0  | 0  | 0  | 0  | 0  | 0  | 99 |
| 0  | 0  | 0  | 0  | 0  | 0  | 0  | 0  |
| 0  | 0  | 0  | 0  | 0  | 0  | 0  | 0  |
| 0  | 0  | 0  | 0  | 0  | 0  | 0  | 0  |
| 0  | 0  | 0  | 0  | 0  | 0  | 0  | 0  |
| 0  | 0  | 0  | 0  | 0  | 0  | 0  | 0  |
| 0  | 0  | 0  | 0  | 0  | 0  | 0  | 0  |
| 99 | 0  | 0  | 1  | 0  | 0  | 0  | 0  |
| 0  | 0  | 0  | 0  | 0  | 0  | 0  | 0  |
| 99 | 99 | 99 | 99 | 99 | 99 | 99 | 99 |
| 1  | 0  | 0  | 0  | 1  | 0  | 0  | 0  |
| 0  | 0  | 0  | 0  | 0  | 0  | 0  | 0  |
| 0  | 0  | 0  | 0  | 0  | 0  | 0  | 0  |
| 0  | 0  | 0  | 0  | 0  | 0  | 0  | 0  |
| 0  | 0  | 0  | 0  | 0  | 0  | 0  | 0  |
| 0  | 0  | 0  | 0  | 0  | 0  | 0  | 0  |
| 0  | 0  | 0  | 0  | 0  | 0  | 0  | 0  |
| 1  | 0  | 0  | 0  | 0  | 0  | 0  | 0  |
| 0  | 0  | 0  | 0  | 0  | 0  | 0  | 0  |
| 0  | 0  | 0  | 0  | 1  | 0  | 0  | 0  |
| 0  | 0  | 0  | 0  | 0  | 0  | 0  | 0  |

|    |    |    |    |    |    |    |    |
|----|----|----|----|----|----|----|----|
| 0  | 0  | 0  | 0  | 0  | 0  | 99 | 99 |
| 1  | 0  | 0  | 0  | 0  | 0  | 0  | 99 |
| 0  | 0  | 0  | 0  | 0  | 0  | 0  | 0  |
| 0  | 0  | 0  | 0  | 0  | 0  | 0  | 0  |
| 1  | 0  | 0  | 0  | 0  | 0  | 0  | 0  |
| 0  | 0  | 0  | 1  | 0  | 0  | 0  | 0  |
| 0  | 0  | 0  | 0  | 0  | 0  | 0  | 0  |
| 0  | 0  | 0  | 0  | 0  | 0  | 0  | 0  |
| 1  | 0  | 0  | 0  | 0  | 0  | 0  | 0  |
| 1  | 0  | 0  | 0  | 0  | 0  | 0  | 0  |
| 1  | 0  | 0  | 0  | 0  | 0  | 0  | 0  |
| 1  | 0  | 0  | 0  | 0  | 0  | 0  | 0  |
| 0  | 0  | 0  | 0  | 0  | 0  | 0  | 0  |
| 1  | 0  | 0  | 1  | 0  | 0  | 0  | 0  |
| 1  | 0  | 0  | 0  | 0  | 0  | 0  | 0  |
| 0  | 0  | 0  | 0  | 0  | 0  | 0  | 0  |
| 0  | 0  | 0  | 0  | 0  | 0  | 0  | 0  |
| 0  | 0  | 0  | 0  | 0  | 0  | 0  | 0  |
| 0  | 0  | 0  | 0  | 0  | 0  | 2  | 7  |
| 0  | 0  | 0  | 0  | 0  | 0  | 0  | 0  |
| 1  | 0  | 0  | 0  | 0  | 0  | 2  | 7  |
| 99 | 99 | 99 | 99 | 99 | 99 | 2  | 99 |
| 0  | 0  | 0  | 0  | 0  | 0  | 0  | 0  |
| 0  | 0  | 0  | 0  | 0  | 0  | 0  | 0  |
| 0  | 0  | 0  | 0  | 0  | 0  | 0  | 0  |
| 0  | 0  | 0  | 0  | 0  | 0  | 0  | 0  |
| 0  | 0  | 0  | 0  | 0  | 0  | 0  | 0  |
| 1  | 0  | 0  | 1  | 0  | 0  | 0  | 0  |
| 0  | 0  | 0  | 0  | 0  | 0  | 0  | 0  |
| 0  | 0  | 0  | 1  | 0  | 0  | 0  | 0  |
| 0  | 0  | 0  | 0  | 0  | 0  | 0  | 0  |
| 0  | 0  | 0  | 0  | 0  | 0  | 0  | 0  |
| 0  | 0  | 0  | 0  | 0  | 0  | 0  | 0  |
| 0  | 0  | 0  | 0  | 0  | 0  | 0  | 0  |
| 0  | 0  | 0  | 0  | 0  | 0  | 0  | 0  |
| 0  | 0  | 0  | 0  | 0  | 0  | 0  | 0  |
| 0  | 0  | 0  | 0  | 0  | 0  | 0  | 0  |
| 1  | 0  | 0  | 0  | 0  | 0  | 0  | 0  |
| 0  | 0  | 0  | 0  | 0  | 0  | 0  | 0  |
| 0  | 0  | 0  | 0  | 0  | 0  | 0  | 0  |
| 0  | 0  | 0  | 0  | 0  | 0  | 0  | 0  |
| 0  | 0  | 0  | 0  | 0  | 0  | 0  | 0  |
| 0  | 0  | 0  | 0  | 0  | 0  | 0  | 0  |
| 0  | 0  | 0  | 1  | 0  | 0  | 0  | 0  |
| 0  | 0  | 0  | 0  | 0  | 0  | 0  | 0  |
| 0  | 0  | 0  | 0  | 0  | 0  | 0  | 0  |
| 0  | 0  | 0  | 0  | 0  | 0  | 0  | 0  |

|    |    |    |    |    |    |    |    |
|----|----|----|----|----|----|----|----|
| 0  | 0  | 0  | 0  | 0  | 0  | 2  | 7  |
| 1  | 5  | 0  | 0  | 3  | 0  | 1  | 4  |
| 0  | 0  | 0  | 0  | 0  | 0  | 0  | 0  |
| 0  | 0  | 0  | 0  | 0  | 0  | 2  | 7  |
| 0  | 0  | 0  | 0  | 0  | 0  | 0  | 0  |
| 0  | 0  | 0  | 0  | 0  | 0  | 0  | 0  |
| 0  | 0  | 0  | 0  | 0  | 0  | 0  | 0  |
| 0  | 0  | 0  | 0  | 0  | 0  | 0  | 0  |
| 1  | 0  | 0  | 0  | 0  | 0  | 0  | 0  |
| 0  | 0  | 0  | 0  | 0  | 0  | 0  | 0  |
| 0  | 0  | 0  | 0  | 0  | 0  | 0  | 0  |
| 0  | 0  | 0  | 0  | 0  | 0  | 0  | 0  |
| 0  | 0  | 0  | 0  | 0  | 0  | 0  | 99 |
| 0  | 0  | 0  | 0  | 0  | 0  | 0  | 0  |
| 0  | 0  | 0  | 0  | 0  | 0  | 0  | 0  |
| 0  | 0  | 0  | 0  | 0  | 0  | 0  | 0  |
| 0  | 0  | 0  | 0  | 0  | 0  | 0  | 0  |
| 0  | 0  | 0  | 0  | 0  | 0  | 0  | 0  |
| 0  | 0  | 0  | 0  | 0  | 0  | 0  | 0  |
| 0  | 0  | 0  | 0  | 0  | 0  | 0  | 0  |
| 0  | 0  | 0  | 0  | 0  | 0  | 0  | 0  |
| 0  | 0  | 0  | 0  | 0  | 0  | 0  | 0  |
| 0  | 0  | 0  | 0  | 0  | 0  | 0  | 0  |
| 0  | 0  | 0  | 0  | 0  | 0  | 0  | 0  |
| 0  | 0  | 0  | 0  | 0  | 0  | 0  | 0  |
| 0  | 0  | 0  | 0  | 0  | 0  | 99 | 99 |
| 0  | 0  | 0  | 0  | 0  | 0  | 0  | 0  |
| 1  | 0  | 0  | 0  | 0  | 0  | 0  | 0  |
| 0  | 0  | 0  | 0  | 0  | 0  | 0  | 0  |
| 99 | 99 | 99 | 99 | 99 | 99 | 0  | 0  |
| 1  | 0  | 0  | 0  | 0  | 0  | 0  | 0  |
| 0  | 0  | 0  | 0  | 0  | 0  | 0  | 0  |
| 1  | 0  | 0  | 0  | 0  | 0  | 0  | 0  |
| 0  | 0  | 0  | 0  | 0  | 0  | 0  | 0  |
| 0  | 0  | 0  | 0  | 0  | 0  | 0  | 0  |
| 0  | 0  | 0  | 0  | 0  | 0  | 0  | 0  |
| 0  | 0  | 0  | 0  | 0  | 0  | 0  | 0  |
| 0  | 0  | 0  | 0  | 0  | 0  | 0  | 0  |
| 0  | 0  | 0  | 0  | 0  | 0  | 2  | 7  |
| 0  | 0  | 0  | 0  | 0  | 0  | 0  | 0  |
| 0  | 0  | 0  | 0  | 0  | 0  | 0  | 0  |
| 1  | 0  | 0  | 0  | 0  | 0  | 0  | 0  |
| 0  | 0  | 0  | 0  | 0  | 0  | 0  | 0  |
| 1  | 0  | 0  | 0  | 0  | 0  | 0  | 0  |
| 0  | 0  | 0  | 0  | 0  | 0  | 0  | 0  |
| 1  | 0  | 0  | 0  | 0  | 0  | 0  | 0  |
| 0  | 0  | 0  | 0  | 0  | 0  | 0  | 0  |
| 1  | 1  | 0  | 0  | 0  | 0  | 0  | 0  |



|    |    |    |    |    |    |   |   |
|----|----|----|----|----|----|---|---|
| 0  | 0  | 0  | 0  | 0  | 0  | 0 | 0 |
| 0  | 0  | 0  | 0  | 0  | 0  | 0 | 0 |
| 0  | 0  | 0  | 0  | 0  | 0  | 0 | 0 |
| 0  | 0  | 0  | 0  | 0  | 0  | 0 | 0 |
| 0  | 0  | 0  | 0  | 0  | 0  | 0 | 0 |
| 0  | 0  | 0  | 0  | 0  | 0  | 0 | 0 |
| 0  | 0  | 0  | 0  | 0  | 0  | 0 | 0 |
| 0  | 0  | 0  | 1  | 0  | 0  | 0 | 0 |
| 0  | 0  | 0  | 0  | 0  | 0  | 0 | 0 |
| 1  | 0  | 0  | 0  | 0  | 0  | 0 | 0 |
| 1  | 0  | 0  | 1  | 1  | 0  | 0 | 0 |
| 0  | 0  | 0  | 0  | 0  | 0  | 0 | 0 |
| 0  | 0  | 0  | 0  | 0  | 0  | 0 | 0 |
| 2  | 1  | 0  | 0  | 0  | 0  | 0 | 0 |
| 0  | 0  | 0  | 0  | 0  | 0  | 0 | 0 |
| 0  | 0  | 0  | 0  | 0  | 0  | 0 | 0 |
| 0  | 0  | 0  | 0  | 0  | 0  | 0 | 0 |
| 0  | 0  | 0  | 0  | 0  | 0  | 0 | 0 |
| 1  | 0  | 0  | 0  | 0  | 0  | 0 | 0 |
| 0  | 0  | 0  | 0  | 0  | 0  | 0 | 0 |
| 0  | 3  | 0  | 99 | 99 | 0  | 0 | 0 |
| 1  | 0  | 0  | 0  | 1  | 0  | 0 | 0 |
| 1  | 1  | 0  | 0  | 0  | 0  | 0 | 0 |
| 1  | 0  | 0  | 0  | 0  | 0  | 0 | 0 |
| 0  | 0  | 0  | 0  | 0  | 0  | 0 | 0 |
| 0  | 0  | 0  | 0  | 0  | 0  | 0 | 0 |
| 0  | 0  | 0  | 0  | 0  | 0  | 0 | 0 |
| 5  | 1  | 0  | 0  | 1  | 0  | 1 | 1 |
| 0  | 0  | 0  | 0  | 0  | 0  | 0 | 0 |
| 0  | 0  | 0  | 0  | 0  | 0  | 0 | 0 |
| 0  | 0  | 0  | 0  | 0  | 0  | 0 | 0 |
| 0  | 0  | 0  | 0  | 0  | 0  | 0 | 0 |
| 0  | 0  | 0  | 0  | 0  | 0  | 0 | 0 |
| 1  | 0  | 0  | 0  | 0  | 0  | 0 | 0 |
| 0  | 0  | 0  | 0  | 0  | 0  | 0 | 0 |
| 0  | 0  | 0  | 0  | 0  | 0  | 0 | 0 |
| 1  | 0  | 0  | 0  | 0  | 0  | 0 | 0 |
| 0  | 0  | 0  | 0  | 0  | 0  | 0 | 0 |
| 1  | 0  | 0  | 0  | 0  | 0  | 2 | 7 |
| 1  | 1  | 0  | 0  | 0  | 0  | 0 | 0 |
| 99 | 0  | 0  | 0  | 0  | 0  | 0 | 0 |
| 0  | 0  | 0  | 0  | 0  | 0  | 0 | 0 |
| 0  | 0  | 0  | 0  | 0  | 0  | 0 | 0 |
| 2  | 0  | 0  | 0  | 0  | 0  | 0 | 0 |
| 0  | 0  | 0  | 0  | 0  | 0  | 0 | 0 |
| 1  | 0  | 0  | 0  | 0  | 0  | 0 | 0 |
| 1  | 2  | 1  | 0  | 0  | 0  | 0 | 0 |
| 3  | 1  | 0  | 0  | 0  | 0  | 1 | 1 |
| 0  | 0  | 0  | 0  | 0  | 0  | 0 | 0 |
| 99 | 99 | 99 | 1  | 99 | 99 | 0 | 0 |

|    |    |    |    |    |    |    |    |
|----|----|----|----|----|----|----|----|
| 1  | 0  | 0  | 0  | 0  | 0  | 0  | 0  |
| 0  | 0  | 0  | 0  | 0  | 0  | 0  | 0  |
| 0  | 0  | 0  | 0  | 0  | 0  | 0  | 0  |
| 0  | 0  | 0  | 0  | 0  | 0  | 0  | 0  |
| 0  | 0  | 0  | 0  | 0  | 0  | 0  | 0  |
| 0  | 0  | 0  | 0  | 0  | 0  | 0  | 0  |
| 0  | 0  | 0  | 0  | 0  | 0  | 0  | 0  |
| 1  | 0  | 0  | 1  | 0  | 0  | 0  | 0  |
| 0  | 0  | 0  | 0  | 0  | 0  | 0  | 0  |
| 1  | 1  | 0  | 0  | 0  | 0  | 0  | 0  |
| 0  | 0  | 0  | 0  | 0  | 0  | 0  | 0  |
| 1  | 0  | 0  | 0  | 0  | 0  | 2  | 7  |
| 0  | 0  | 0  | 0  | 0  | 0  | 0  | 0  |
| 0  | 0  | 0  | 0  | 0  | 0  | 0  | 0  |
| 1  | 0  | 0  | 0  | 0  | 0  | 0  | 0  |
| 0  | 0  | 0  | 0  | 0  | 0  | 0  | 0  |
| 2  | 0  | 0  | 0  | 0  | 0  | 2  | 7  |
| 99 | 99 | 99 | 99 | 99 | 99 | 99 | 99 |
| 1  | 99 | 99 | 99 | 99 | 99 | 0  | 0  |
| 1  | 0  | 0  | 0  | 1  | 0  | 0  | 0  |
| 2  | 0  | 0  | 0  | 1  | 0  | 0  | 0  |
| 3  | 0  | 0  | 0  | 0  | 0  | 0  | 0  |
| 1  | 0  | 0  | 0  | 0  | 0  | 0  | 0  |
| 0  | 0  | 0  | 0  | 0  | 0  | 0  | 7  |
| 0  | 0  | 0  | 0  | 0  | 0  | 0  | 0  |
| 0  | 0  | 0  | 2  | 1  | 0  | 0  | 0  |
| 0  | 0  | 0  | 0  | 0  | 0  | 2  | 7  |
| 2  | 0  | 0  | 0  | 0  | 0  | 0  | 0  |
| 0  | 0  | 0  | 0  | 0  | 0  | 2  | 7  |
| 0  | 0  | 0  | 0  | 0  | 0  | 2  | 99 |
| 0  | 0  | 0  | 0  | 0  | 0  | 0  | 0  |
| 0  | 0  | 0  | 0  | 0  | 0  | 0  | 0  |
| 0  | 0  | 0  | 0  | 0  | 0  | 0  | 0  |
| 0  | 0  | 0  | 0  | 0  | 0  | 0  | 0  |
| 1  | 0  | 0  | 0  | 0  | 0  | 0  | 0  |
| 0  | 0  | 0  | 0  | 0  | 0  | 0  | 0  |
| 0  | 0  | 0  | 0  | 0  | 0  | 0  | 0  |
| 0  | 0  | 0  | 0  | 0  | 0  | 0  | 0  |
| 0  | 0  | 0  | 0  | 0  | 0  | 0  | 0  |
| 0  | 0  | 0  | 0  | 0  | 0  | 0  | 0  |
| 0  | 0  | 0  | 0  | 0  | 0  | 0  | 0  |
| 0  | 0  | 0  | 0  | 0  | 0  | 0  | 0  |
| 0  | 0  | 0  | 0  | 0  | 0  | 0  | 0  |
| 0  | 0  | 0  | 0  | 0  | 0  | 0  | 0  |
| 0  | 0  | 0  | 0  | 0  | 0  | 0  | 0  |
| 0  | 0  | 0  | 0  | 0  | 0  | 0  | 0  |
| 0  | 0  | 0  | 0  | 0  | 0  | 0  | 0  |
| 0  | 0  | 0  | 0  | 0  | 0  | 0  | 0  |
| 0  | 0  | 0  | 0  | 0  | 0  | 0  | 0  |
| 3  | 0  | 0  | 1  | 3  | 0  | 1  | 1  |

|    |    |   |   |   |   |   |    |
|----|----|---|---|---|---|---|----|
| 0  | 0  | 0 | 0 | 0 | 0 | 0 | 0  |
| 0  | 0  | 0 | 0 | 0 | 0 | 0 | 99 |
| 0  | 0  | 0 | 0 | 0 | 0 | 0 | 0  |
| 1  | 1  | 0 | 0 | 0 | 0 | 0 | 0  |
| 1  | 0  | 0 | 0 | 0 | 0 | 0 | 0  |
| 0  | 0  | 0 | 0 | 0 | 0 | 0 | 0  |
| 2  | 0  | 0 | 0 | 0 | 0 | 0 | 0  |
| 0  | 0  | 0 | 0 | 0 | 0 | 0 | 0  |
| 1  | 0  | 0 | 0 | 0 | 0 | 0 | 0  |
| 0  | 0  | 0 | 0 | 0 | 0 | 0 | 0  |
| 0  | 0  | 0 | 0 | 0 | 0 | 0 | 0  |
| 0  | 0  | 0 | 0 | 0 | 0 | 0 | 0  |
| 0  | 0  | 0 | 0 | 0 | 0 | 0 | 0  |
| 0  | 0  | 0 | 0 | 0 | 0 | 0 | 0  |
| 0  | 0  | 0 | 0 | 0 | 0 | 0 | 0  |
| 0  | 0  | 0 | 0 | 0 | 0 | 0 | 0  |
| 1  | 0  | 0 | 1 | 0 | 0 | 1 | 1  |
| 0  | 0  | 0 | 0 | 0 | 0 | 0 | 0  |
| 99 | 0  | 0 | 0 | 0 | 0 | 0 | 0  |
| 0  | 0  | 0 | 0 | 0 | 0 | 0 | 0  |
| 1  | 1  | 1 | 0 | 0 | 0 | 0 | 0  |
| 0  | 0  | 0 | 0 | 2 | 0 | 0 | 0  |
| 1  | 0  | 0 | 0 | 0 | 0 | 0 | 0  |
| 0  | 0  | 0 | 0 | 0 | 0 | 2 | 7  |
| 2  | 4  | 4 | 0 | 0 | 5 | 1 | 0  |
| 0  | 0  | 0 | 0 | 0 | 0 | 0 | 0  |
| 3  | 0  | 0 | 0 | 0 | 0 | 2 | 7  |
| 0  | 0  | 0 | 0 | 0 | 0 | 0 | 0  |
| 1  | 1  | 0 | 0 | 0 | 0 | 0 | 0  |
| 0  | 99 | 0 | 0 | 0 | 0 | 0 | 0  |
| 2  | 2  | 1 | 0 | 0 | 0 | 0 | 0  |
| 0  | 5  | 0 | 0 | 0 | 0 | 0 | 0  |
| 1  | 0  | 0 | 0 | 0 | 0 | 0 | 0  |
| 1  | 0  | 0 | 1 | 0 | 0 | 0 | 0  |
| 1  | 0  | 0 | 0 | 0 | 0 | 0 | 0  |
| 0  | 0  | 0 | 0 | 0 | 0 | 0 | 0  |
| 1  | 0  | 0 | 0 | 0 | 0 | 0 | 0  |
| 0  | 0  | 0 | 0 | 0 | 0 | 0 | 0  |
| 2  | 0  | 0 | 0 | 0 | 0 | 0 | 0  |
| 1  | 0  | 0 | 0 | 0 | 0 | 0 | 0  |
| 0  | 0  | 0 | 0 | 0 | 0 | 0 | 0  |
| 0  | 0  | 0 | 0 | 0 | 0 | 2 | 7  |
| 3  | 4  | 1 | 1 | 0 | 0 | 2 | 7  |
| 5  | 5  | 2 | 0 | 0 | 0 | 2 | 7  |
| 1  | 0  | 0 | 0 | 0 | 0 | 0 | 0  |
| 0  | 2  | 0 | 0 | 0 | 0 | 0 | 0  |
| 0  | 0  | 0 | 0 | 0 | 0 | 0 | 0  |
| 1  | 1  | 0 | 5 | 0 | 0 | 0 | 0  |
| 0  | 0  | 0 | 0 | 1 | 0 | 0 | 0  |



|   |   |    |    |    |    |    |    |
|---|---|----|----|----|----|----|----|
| 0 | 0 | 0  | 0  | 0  | 0  | 0  | 0  |
| 1 | 0 | 0  | 0  | 0  | 0  | 0  | 0  |
| 0 | 0 | 0  | 0  | 0  | 0  | 0  | 0  |
| 0 | 0 | 0  | 0  | 0  | 0  | 0  | 0  |
| 0 | 0 | 0  | 0  | 0  | 0  | 0  | 0  |
| 1 | 0 | 0  | 0  | 0  | 0  | 0  | 0  |
| 0 | 0 | 0  | 0  | 0  | 0  | 0  | 0  |
| 0 | 0 | 0  | 0  | 0  | 0  | 0  | 0  |
| 0 | 0 | 0  | 0  | 0  | 0  | 0  | 0  |
| 1 | 0 | 0  | 0  | 0  | 0  | 2  | 7  |
| 1 | 0 | 0  | 0  | 2  | 0  | 0  | 0  |
| 2 | 0 | 0  | 1  | 0  | 0  | 0  | 0  |
| 0 | 0 | 0  | 0  | 0  | 0  | 0  | 0  |
| 1 | 0 | 0  | 0  | 0  | 0  | 0  | 0  |
| 0 | 0 | 0  | 0  | 0  | 0  | 99 | 99 |
| 0 | 0 | 0  | 0  | 0  | 0  | 0  | 0  |
| 1 | 0 | 0  | 1  | 0  | 0  | 99 | 0  |
| 0 | 0 | 0  | 0  | 0  | 0  | 99 | 99 |
| 1 | 0 | 0  | 0  | 0  | 0  | 0  | 0  |
| 0 | 0 | 0  | 0  | 0  | 0  | 0  | 0  |
| 0 | 0 | 0  | 0  | 1  | 0  | 0  | 0  |
| 0 | 0 | 0  | 0  | 0  | 0  | 0  | 0  |
| 1 | 3 | 99 | 99 | 99 | 99 | 0  | 99 |
| 1 | 0 | 0  | 0  | 0  | 0  | 0  | 0  |
| 0 | 0 | 0  | 0  | 0  | 0  | 0  | 0  |
| 0 | 0 | 0  | 0  | 0  | 0  | 0  | 0  |
| 0 | 0 | 0  | 0  | 0  | 0  | 0  | 0  |
| 0 | 0 | 0  | 0  | 0  | 0  | 0  | 0  |
| 0 | 0 | 0  | 0  | 0  | 0  | 0  | 0  |
| 0 | 0 | 0  | 0  | 0  | 0  | 0  | 0  |
| 0 | 0 | 0  | 0  | 1  | 0  | 0  | 0  |
| 1 | 0 | 0  | 0  | 0  | 0  | 0  | 0  |
| 1 | 0 | 0  | 0  | 0  | 0  | 0  | 0  |
| 2 | 0 | 0  | 0  | 0  | 0  | 0  | 0  |
| 0 | 0 | 0  | 0  | 0  | 0  | 0  | 0  |
| 0 | 0 | 0  | 0  | 0  | 0  | 0  | 0  |
| 0 | 0 | 0  | 0  | 0  | 0  | 0  | 0  |
| 0 | 0 | 0  | 0  | 0  | 0  | 0  | 0  |
| 1 | 0 | 0  | 0  | 0  | 0  | 0  | 0  |
| 0 | 0 | 0  | 0  | 0  | 0  | 0  | 0  |
| 0 | 0 | 0  | 0  | 0  | 0  | 0  | 0  |
| 0 | 0 | 0  | 0  | 0  | 0  | 0  | 0  |
| 0 | 0 | 0  | 0  | 0  | 0  | 0  | 0  |
| 2 | 0 | 0  | 0  | 0  | 0  | 2  | 0  |
| 0 | 0 | 0  | 0  | 0  | 0  | 0  | 0  |
| 2 | 0 | 0  | 0  | 0  | 0  | 0  | 0  |
| 0 | 0 | 0  | 0  | 0  | 0  | 0  | 0  |
| 4 | 0 | 0  | 0  | 0  | 0  | 0  | 0  |

|   |    |    |   |   |    |   |   |
|---|----|----|---|---|----|---|---|
| 0 | 0  | 0  | 0 | 0 | 0  | 0 | 0 |
| 0 | 0  | 0  | 0 | 0 | 0  | 0 | 0 |
| 0 | 0  | 0  | 0 | 0 | 0  | 0 | 0 |
| 0 | 0  | 0  | 0 | 0 | 99 | 2 | 7 |
| 0 | 0  | 0  | 0 | 0 | 0  | 0 | 0 |
| 0 | 0  | 0  | 0 | 0 | 0  | 0 | 0 |
| 1 | 0  | 0  | 0 | 0 | 0  | 0 | 0 |
| 0 | 0  | 0  | 0 | 0 | 0  | 0 | 0 |
| 0 | 0  | 0  | 0 | 0 | 0  | 0 | 0 |
| 2 | 0  | 0  | 0 | 0 | 0  | 0 | 0 |
| 0 | 0  | 0  | 0 | 0 | 0  | 0 | 0 |
| 0 | 0  | 0  | 3 | 0 | 0  | 0 | 0 |
| 0 | 0  | 0  | 0 | 0 | 0  | 2 | 7 |
| 1 | 0  | 0  | 1 | 0 | 0  | 1 | 1 |
| 0 | 0  | 0  | 0 | 0 | 0  | 0 | 0 |
| 0 | 0  | 0  | 0 | 0 | 0  | 0 | 0 |
| 2 | 0  | 0  | 0 | 0 | 0  | 0 | 0 |
| 0 | 0  | 0  | 0 | 0 | 0  | 0 | 0 |
| 0 | 0  | 0  | 0 | 0 | 0  | 1 | 0 |
| 0 | 0  | 0  | 0 | 0 | 0  | 0 | 0 |
| 1 | 0  | 0  | 0 | 0 | 0  | 0 | 0 |
| 1 | 1  | 0  | 0 | 0 | 0  | 0 | 0 |
| 0 | 0  | 0  | 0 | 0 | 0  | 0 | 0 |
| 0 | 0  | 0  | 0 | 0 | 0  | 0 | 0 |
| 0 | 0  | 0  | 0 | 0 | 0  | 1 | 1 |
| 0 | 0  | 0  | 0 | 0 | 0  | 0 | 0 |
| 1 | 0  | 0  | 0 | 0 | 0  | 0 | 0 |
| 1 | 99 | 99 | 0 | 0 | 0  | 0 | 0 |
| 0 | 0  | 0  | 0 | 0 | 0  | 0 | 0 |
| 0 | 0  | 0  | 0 | 0 | 0  | 0 | 0 |
| 2 | 0  | 0  | 0 | 0 | 0  | 0 | 0 |
| 0 | 0  | 0  | 0 | 0 | 0  | 0 | 0 |
| 0 | 0  | 0  | 0 | 0 | 0  | 0 | 0 |
| 0 | 0  | 0  | 0 | 0 | 0  | 0 | 0 |
| 0 | 0  | 0  | 0 | 0 | 0  | 0 | 0 |
| 0 | 0  | 0  | 0 | 0 | 0  | 0 | 0 |
| 0 | 0  | 0  | 0 | 0 | 0  | 0 | 0 |
| 2 | 5  | 0  | 0 | 0 | 0  | 2 | 4 |
| 0 | 0  | 0  | 0 | 0 | 0  | 0 | 0 |
| 0 | 0  | 0  | 0 | 0 | 0  | 0 | 0 |
| 1 | 0  | 0  | 0 | 0 | 0  | 0 | 0 |
| 0 | 0  | 0  | 0 | 0 | 0  | 0 | 0 |
| 0 | 0  | 0  | 0 | 0 | 0  | 0 | 0 |
| 0 | 0  | 0  | 0 | 0 | 0  | 0 | 0 |
| 1 | 0  | 0  | 0 | 0 | 0  | 0 | 7 |

|   |   |   |   |   |    |    |    |
|---|---|---|---|---|----|----|----|
| 0 | 0 | 0 | 0 | 0 | 0  | 0  | 0  |
| 1 | 0 | 1 | 0 | 0 | 0  | 0  | 1  |
| 0 | 0 | 0 | 0 | 0 | 0  | 0  | 0  |
| 0 | 0 | 0 | 0 | 0 | 0  | 0  | 0  |
| 0 | 0 | 0 | 0 | 0 | 0  | 0  | 0  |
| 1 | 0 | 0 | 0 | 0 | 0  | 0  | 0  |
| 0 | 0 | 0 | 0 | 0 | 0  | 0  | 0  |
| 0 | 0 | 0 | 0 | 0 | 0  | 0  | 0  |
| 0 | 0 | 0 | 0 | 0 | 0  | 0  | 0  |
| 1 | 0 | 0 | 0 | 0 | 0  | 0  | 0  |
| 1 | 2 | 3 | 0 | 4 | 99 | 99 | 7  |
| 0 | 0 | 0 | 0 | 0 | 0  | 0  | 0  |
| 0 | 0 | 0 | 0 | 0 | 0  | 0  | 0  |
| 0 | 0 | 0 | 0 | 0 | 0  | 0  | 0  |
| 1 | 0 | 0 | 0 | 2 | 0  | 0  | 0  |
| 0 | 0 | 0 | 0 | 0 | 0  | 0  | 0  |
| 1 | 0 | 0 | 0 | 0 | 0  | 0  | 0  |
| 0 | 0 | 0 | 0 | 0 | 0  | 0  | 0  |
| 0 | 0 | 0 | 0 | 0 | 0  | 0  | 0  |
| 0 | 0 | 0 | 0 | 0 | 0  | 0  | 0  |
| 0 | 0 | 0 | 0 | 0 | 0  | 0  | 0  |
| 0 | 0 | 0 | 0 | 0 | 0  | 0  | 0  |
| 0 | 0 | 0 | 0 | 0 | 0  | 0  | 0  |
| 0 | 0 | 0 | 0 | 0 | 0  | 0  | 0  |
| 0 | 0 | 0 | 0 | 0 | 0  | 0  | 0  |
| 0 | 0 | 0 | 0 | 0 | 0  | 0  | 0  |
| 0 | 0 | 0 | 0 | 0 | 0  | 0  | 0  |
| 0 | 0 | 0 | 0 | 0 | 0  | 0  | 0  |
| 0 | 0 | 0 | 0 | 0 | 0  | 0  | 0  |
| 0 | 0 | 0 | 0 | 0 | 0  | 0  | 0  |
| 0 | 0 | 0 | 0 | 0 | 0  | 0  | 0  |
| 0 | 0 | 0 | 0 | 0 | 0  | 0  | 0  |
| 1 | 0 | 0 | 0 | 0 | 0  | 0  | 0  |
| 0 | 0 | 0 | 0 | 0 | 0  | 0  | 0  |
| 1 | 0 | 0 | 1 | 0 | 0  | 0  | 0  |
| 0 | 0 | 0 | 0 | 0 | 0  | 0  | 0  |
| 0 | 0 | 0 | 0 | 0 | 0  | 0  | 0  |
| 4 | 0 | 0 | 0 | 0 | 0  | 2  | 7  |
| 0 | 0 | 0 | 0 | 0 | 0  | 0  | 0  |
| 0 | 0 | 0 | 0 | 0 | 0  | 0  | 0  |
| 0 | 0 | 0 | 0 | 0 | 0  | 0  | 0  |
| 1 | 0 | 0 | 0 | 0 | 0  | 0  | 0  |
| 0 | 0 | 0 | 0 | 0 | 0  | 0  | 0  |
| 1 | 0 | 0 | 0 | 0 | 0  | 0  | 0  |
| 3 | 4 | 0 | 1 | 0 | 0  | 0  | 0  |
| 0 | 0 | 0 | 1 | 2 | 0  | 0  | 0  |
| 2 | 1 | 0 | 0 | 0 | 0  | 0  | 0  |
| 0 | 1 | 0 | 0 | 0 | 0  | 0  | 0  |
| 0 | 0 | 0 | 0 | 0 | 0  | 0  | 99 |
| 0 | 0 | 0 | 0 | 0 | 0  | 0  | 0  |

|   |   |   |   |   |   |   |   |
|---|---|---|---|---|---|---|---|
| 0 | 0 | 0 | 0 | 0 | 0 | 0 | 0 |
| 3 | 5 | 0 | 0 | 0 | 0 | 0 | 0 |
| 0 | 0 | 0 | 0 | 0 | 0 | 0 | 0 |
| 0 | 0 | 0 | 0 | 0 | 0 | 0 | 0 |
| 0 | 0 | 0 | 0 | 0 | 0 | 0 | 0 |
| 1 | 0 | 0 | 0 | 0 | 0 | 0 | 0 |
| 2 | 0 | 0 | 1 | 0 | 0 | 0 | 0 |
| 0 | 0 | 0 | 0 | 0 | 0 | 0 | 0 |
| 0 | 0 | 0 | 0 | 0 | 0 | 0 | 0 |
| 0 | 0 | 0 | 0 | 0 | 0 | 0 | 0 |
| 1 | 0 | 0 | 0 | 0 | 0 | 0 | 0 |
| 1 | 0 | 0 | 0 | 0 | 0 | 0 | 0 |
| 1 | 0 | 0 | 0 | 0 | 0 | 0 | 0 |
| 1 | 0 | 0 | 0 | 0 | 0 | 0 | 0 |
| 0 | 0 | 0 | 0 | 0 | 0 | 0 | 0 |
| 0 | 0 | 0 | 0 | 0 | 0 | 0 | 0 |
| 0 | 0 | 0 | 0 | 0 | 0 | 0 | 0 |
| 1 | 1 | 0 | 0 | 0 | 0 | 0 | 0 |
| 0 | 0 | 0 | 0 | 0 | 0 | 0 | 0 |
| 0 | 0 | 0 | 0 | 0 | 0 | 0 | 0 |
| 0 | 0 | 0 | 0 | 0 | 0 | 0 | 0 |
| 0 | 1 | 0 | 0 | 0 | 0 | 0 | 7 |
| 0 | 0 | 0 | 0 | 0 | 0 | 0 | 0 |
| 1 | 0 | 0 | 0 | 0 | 0 | 0 | 0 |
| 0 | 0 | 0 | 0 | 0 | 0 | 0 | 0 |
| 0 | 0 | 0 | 0 | 0 | 0 | 0 | 0 |
| 0 | 0 | 0 | 0 | 0 | 0 | 0 | 0 |
| 0 | 0 | 0 | 0 | 0 | 0 | 0 | 0 |
| 0 | 0 | 0 | 0 | 0 | 0 | 0 | 0 |
| 0 | 0 | 0 | 0 | 0 | 0 | 0 | 0 |
| 0 | 0 | 0 | 0 | 0 | 0 | 0 | 0 |
| 0 | 0 | 0 | 0 | 0 | 0 | 2 | 7 |
| 0 | 0 | 0 | 0 | 0 | 0 | 0 | 0 |
| 1 | 0 | 0 | 0 | 0 | 0 | 0 | 0 |
| 1 | 0 | 0 | 0 | 0 | 0 | 0 | 0 |
| 0 | 0 | 0 | 0 | 0 | 0 | 0 | 0 |
| 0 | 0 | 0 | 0 | 0 | 0 | 2 | 7 |
| 0 | 0 | 0 | 0 | 0 | 0 | 0 | 0 |
| 0 | 0 | 0 | 0 | 0 | 0 | 0 | 0 |
| 0 | 0 | 0 | 1 | 0 | 0 | 0 | 0 |
| 0 | 0 | 0 | 0 | 0 | 0 | 0 | 0 |
| 1 | 2 | 1 | 0 | 1 | 0 | 0 | 0 |
| 0 | 0 | 0 | 0 | 0 | 0 | 0 | 0 |
| 0 | 0 | 0 | 0 | 1 | 0 | 0 | 0 |
| 5 | 1 | 0 | 0 | 0 | 0 | 0 | 0 |
| 1 | 0 | 0 | 0 | 2 | 0 | 0 | 7 |
| 0 | 0 | 0 | 0 | 0 | 0 | 0 | 0 |
| 1 | 0 | 0 | 0 | 0 | 0 | 0 | 0 |
| 0 | 0 | 0 | 0 | 0 | 0 | 0 | 0 |
| 0 | 0 | 0 | 0 | 0 | 0 | 0 | 0 |

|    |   |    |   |   |   |   |   |
|----|---|----|---|---|---|---|---|
| 0  | 0 | 0  | 0 | 0 | 0 | 0 | 0 |
| 0  | 1 | 99 | 0 | 0 | 0 | 0 | 0 |
| 2  | 0 | 0  | 1 | 2 | 0 | 0 | 0 |
| 0  | 0 | 0  | 0 | 0 | 0 | 0 | 0 |
| 0  | 0 | 0  | 0 | 0 | 0 | 0 | 0 |
| 0  | 0 | 0  | 1 | 0 | 0 | 0 | 0 |
| 0  | 0 | 0  | 0 | 0 | 0 | 0 | 0 |
| 0  | 0 | 0  | 0 | 0 | 0 | 0 | 0 |
| 0  | 0 | 0  | 0 | 0 | 0 | 0 | 0 |
| 0  | 0 | 0  | 0 | 0 | 0 | 0 | 0 |
| 0  | 0 | 0  | 0 | 0 | 0 | 0 | 0 |
| 0  | 0 | 0  | 0 | 0 | 0 | 0 | 0 |
| 0  | 0 | 0  | 0 | 0 | 0 | 0 | 0 |
| 1  | 0 | 0  | 0 | 0 | 0 | 0 | 0 |
| 0  | 0 | 0  | 0 | 0 | 0 | 0 | 0 |
| 0  | 0 | 0  | 0 | 0 | 0 | 0 | 0 |
| 4  | 5 | 1  | 0 | 1 | 0 | 2 | 7 |
| 0  | 0 | 0  | 0 | 0 | 0 | 0 | 0 |
| 0  | 0 | 0  | 0 | 0 | 0 | 0 | 0 |
| 1  | 0 | 0  | 0 | 0 | 0 | 0 | 0 |
| 0  | 0 | 0  | 0 | 0 | 0 | 0 | 0 |
| 0  | 0 | 0  | 0 | 0 | 0 | 0 | 0 |
| 1  | 0 | 0  | 0 | 0 | 0 | 0 | 0 |
| 0  | 0 | 0  | 0 | 0 | 0 | 0 | 0 |
| 0  | 0 | 0  | 0 | 0 | 0 | 0 | 0 |
| 2  | 2 | 1  | 0 | 0 | 0 | 0 | 0 |
| 1  | 0 | 0  | 0 | 0 | 0 | 0 | 0 |
| 0  | 0 | 0  | 0 | 0 | 0 | 0 | 0 |
| 0  | 0 | 0  | 0 | 0 | 0 | 0 | 0 |
| 0  | 0 | 0  | 0 | 0 | 0 | 0 | 0 |
| 0  | 0 | 0  | 0 | 0 | 0 | 0 | 0 |
| 0  | 0 | 0  | 0 | 0 | 0 | 0 | 0 |
| 0  | 0 | 0  | 0 | 0 | 0 | 0 | 0 |
| 0  | 0 | 0  | 0 | 0 | 0 | 0 | 0 |
| 1  | 0 | 0  | 0 | 0 | 0 | 1 | 1 |
| 1  | 2 | 99 | 0 | 0 | 0 | 0 | 0 |
| 0  | 0 | 0  | 0 | 0 | 0 | 0 | 0 |
| 2  | 0 | 0  | 0 | 3 | 0 | 0 | 0 |
| 0  | 0 | 0  | 0 | 0 | 0 | 0 | 0 |
| 1  | 0 | 0  | 0 | 0 | 0 | 0 | 0 |
| 0  | 0 | 0  | 0 | 0 | 0 | 0 | 0 |
| 1  | 0 | 0  | 0 | 0 | 0 | 0 | 0 |
| 1  | 0 | 0  | 0 | 0 | 0 | 0 | 0 |
| 99 | 0 | 0  | 0 | 0 | 0 | 2 | 7 |
| 0  | 0 | 0  | 0 | 0 | 0 | 0 | 0 |
| 1  | 0 | 0  | 0 | 0 | 0 | 0 | 0 |
| 2  | 0 | 0  | 2 | 0 | 0 | 0 | 0 |
| 0  | 0 | 0  | 0 | 0 | 0 | 0 | 0 |
| 0  | 0 | 0  | 0 | 0 | 0 | 0 | 0 |









| condom_pre | oral_pre | pressurea_pre | pressureb_pre | pressurec_pre | pressured_pre | pressuree_pre |
|------------|----------|---------------|---------------|---------------|---------------|---------------|
| 3          | 0        | 99            | 99            | 99            | 99            | 99            |
| 0          | 0        | 99            | 4             | 1             | 4             | 99            |
| 3          | 0        | 1             | 4             | 1             | 1             | 1             |
| 3          | 0        | 4             | 4             | 1             | 4             | 1             |
| 3          | 0        | 1             | 4             | 1             | 4             | 2             |
| 99         | 99       | 99            | 99            | 99            | 99            | 99            |
| 1          | 2        | 2             | 4             | 1             | 1             | 3             |
| 3          | 2        | 3             | 2             | 2             | 2             | 2             |
| 3          | 2        | 99            | 99            | 99            | 99            | 99            |
| 3          | 2        | 1             | 1             | 1             | 1             | 1             |
| 3          | 0        | 3             | 3             | 3             | 99            | 2             |
| 3          | 0        | 1             | 4             | 1             | 4             | 1             |
| 3          | 0        | 2             | 4             | 1             | 4             | 1             |
| 3          | 0        | 1             | 1             | 1             | 1             | 1             |
| 0          | 0        | 1             | 1             | 1             | 1             | 1             |
| 3          | 0        | 2             | 3             | 2             | 3             | 2             |
| 3          | 0        | 99            | 99            | 99            | 99            | 99            |
| 99         | 0        | 2             | 3             | 3             | 2             | 2             |
| 3          | 0        | 99            | 4             | 1             | 4             | 2             |
| 1          | 1        | 2             | 3             | 2             | 3             | 2             |
| 99         | 99       | 99            | 99            | 99            | 99            | 99            |
| 99         | 99       | 1             | 1             | 1             | 1             | 1             |
| 3          | 0        | 99            | 99            | 99            | 99            | 99            |
| 3          | 0        | 1             | 4             | 1             | 4             | 2             |
| 3          | 0        | 99            | 4             | 1             | 4             | 2             |
| 3          | 0        | 1             | 4             | 1             | 4             | 1             |
| 3          | 0        | 2             | 3             | 2             | 3             | 2             |
| 3          | 0        | 4             | 4             | 1             | 4             | 1             |
| 3          | 0        | 3             | 3             | 2             | 3             | 1             |
| 3          | 0        | 1             | 1             | 1             | 1             | 1             |
| 3          | 0        | 1             | 1             | 1             | 1             | 1             |
| 1          | 1        | 1             | 4             | 4             | 4             | 1             |
| 3          | 0        | 2             | 4             | 2             | 2             | 1             |
| 3          | 0        | 1             | 1             | 1             | 1             | 1             |
| 0          | 0        | 99            | 99            | 99            | 99            | 99            |
| 3          | 0        | 1             | 4             | 1             | 4             | 1             |
| 3          | 0        | 2             | 3             | 2             | 3             | 2             |
| 3          | 0        | 1             | 4             | 1             | 4             | 1             |
| 3          | 0        | 1             | 4             | 1             | 4             | 1             |
| 3          | 0        | 1             | 1             | 2             | 3             | 1             |
| 3          | 0        | 1             | 1             | 1             | 4             | 1             |
| 3          | 0        | 2             | 1             | 1             | 1             | 1             |
| 3          | 0        | 1             | 4             | 99            | 99            | 99            |
| 3          | 0        | 1             | 4             | 1             | 4             | 1             |
| 3          | 0        | 3             | 1             | 99            | 3             | 1             |
| 3          | 0        | 1             | 4             | 1             | 4             | 1             |
| 1          | 1        | 2             | 3             | 2             | 3             | 2             |

|   |   |   |   |   |   |   |
|---|---|---|---|---|---|---|
| 3 | 0 | 4 | 4 | 2 | 4 | 3 |
| 3 | 0 | 1 | 4 | 1 | 4 | 1 |
| 3 | 0 | 1 | 4 | 1 | 4 | 1 |
| 3 | 0 | 2 | 3 | 2 | 3 | 2 |
| 1 | 0 | 3 | 4 | 1 | 3 | 2 |
| 3 | 0 | 1 | 4 | 2 | 4 | 2 |
| 3 | 0 | 1 | 4 | 1 | 4 | 1 |
| 2 | 2 | 2 | 4 | 1 | 4 | 1 |
| 3 | 0 | 1 | 4 | 1 | 4 | 1 |
| 3 | 0 | 1 | 4 | 1 | 3 | 2 |
| 3 | 0 | 2 | 3 | 2 | 3 | 2 |
| 3 | 0 | 1 | 1 | 1 | 4 | 1 |
| 3 | 0 | 2 | 3 | 2 | 3 | 3 |
| 3 | 0 | 1 | 4 | 1 | 4 | 1 |
| 3 | 0 | 1 | 4 | 1 | 4 | 1 |
| 0 | 0 | 2 | 4 | 1 | 4 | 1 |
| 3 | 0 | 2 | 2 | 2 | 3 | 2 |
| 3 | 0 | 1 | 4 | 1 | 4 | 3 |
| 3 | 0 | 2 | 4 | 2 | 4 | 2 |
| 3 | 0 | 1 | 4 | 2 | 1 | 2 |
| 0 | 0 | 2 | 2 | 2 | 2 | 2 |
| 3 | 0 | 1 | 4 | 1 | 4 | 1 |
| 3 | 0 | 1 | 4 | 1 | 4 | 1 |
| 3 | 0 | 3 | 4 | 1 | 2 | 1 |
| 3 | 0 | 1 | 4 | 1 | 4 | 1 |
| 3 | 0 | 4 | 4 | 1 | 4 | 1 |
| 0 | 0 | 4 | 4 | 4 | 4 | 4 |
| 2 | 0 | 2 | 3 | 3 | 3 | 2 |
| 3 | 0 | 2 | 4 | 2 | 3 | 2 |
| 3 | 0 | 1 | 4 | 1 | 4 | 1 |
| 3 | 0 | 1 | 4 | 1 | 4 | 1 |
| 3 | 0 | 2 | 3 | 2 | 3 | 2 |
| 3 | 0 | 1 | 4 | 1 | 4 | 1 |
| 3 | 1 | 1 | 4 | 1 | 4 | 1 |
| 3 | 0 | 1 | 4 | 1 | 4 | 1 |
| 3 | 0 | 1 | 4 | 1 | 4 | 1 |
| 3 | 0 | 1 | 4 | 1 | 4 | 1 |
| 3 | 0 | 3 | 4 | 1 | 4 | 1 |
| 3 | 0 | 1 | 4 | 1 | 4 | 1 |
| 3 | 0 | 2 | 1 | 2 | 3 | 2 |
| 0 | 1 | 3 | 3 | 2 | 2 | 3 |
| 3 | 0 | 1 | 4 | 1 | 4 | 1 |
| 0 | 0 | 3 | 2 | 2 | 2 | 2 |
| 3 | 0 | 2 | 3 | 2 | 3 | 2 |
| 3 | 0 | 1 | 4 | 1 | 4 | 1 |
| 3 | 0 | 1 | 4 | 1 | 4 | 1 |
| 3 | 0 | 4 | 4 | 1 | 4 | 1 |

|   |   |    |    |    |    |    |
|---|---|----|----|----|----|----|
| 3 | 0 | 1  | 4  | 2  | 2  | 2  |
| 3 | 0 | 1  | 4  | 1  | 4  | 1  |
| 3 | 0 | 3  | 3  | 2  | 3  | 2  |
| 3 | 0 | 1  | 4  | 1  | 4  | 1  |
| 3 | 0 | 1  | 4  | 1  | 4  | 1  |
| 3 | 0 | 1  | 4  | 1  | 4  | 1  |
| 3 | 0 | 1  | 4  | 1  | 4  | 1  |
| 3 | 0 | 1  | 4  | 1  | 4  | 1  |
| 1 | 0 | 1  | 4  | 1  | 4  | 99 |
| 3 | 0 | 1  | 4  | 1  | 4  | 1  |
| 3 | 0 | 4  | 4  | 1  | 4  | 1  |
| 1 | 0 | 4  | 4  | 2  | 2  | 2  |
| 3 | 0 | 2  | 4  | 1  | 4  | 1  |
| 3 | 0 | 2  | 3  | 1  | 3  | 1  |
| 3 | 0 | 2  | 3  | 2  | 2  | 2  |
| 1 | 1 | 1  | 4  | 1  | 4  | 1  |
| 3 | 0 | 1  | 4  | 1  | 4  | 1  |
| 3 | 0 | 2  | 1  | 1  | 3  | 1  |
| 3 | 0 | 2  | 3  | 1  | 3  | 1  |
| 3 | 0 | 3  | 4  | 2  | 4  | 3  |
| 3 | 0 | 1  | 4  | 1  | 4  | 2  |
| 3 | 0 | 1  | 4  | 1  | 4  | 1  |
| 1 | 0 | 4  | 4  | 4  | 4  | 4  |
| 3 | 0 | 4  | 4  | 1  | 4  | 1  |
| 3 | 0 | 1  | 4  | 1  | 4  | 1  |
| 1 | 1 | 1  | 1  | 99 | 99 | 4  |
| 3 | 0 | 4  | 3  | 3  | 3  | 1  |
| 3 | 0 | 2  | 4  | 1  | 4  | 1  |
| 3 | 0 | 2  | 3  | 2  | 2  | 3  |
| 3 | 0 | 1  | 4  | 1  | 4  | 1  |
| 3 | 0 | 99 | 1  | 1  | 4  | 1  |
| 3 | 0 | 1  | 99 | 4  | 1  | 4  |
| 3 | 0 | 1  | 4  | 1  | 4  | 1  |
| 3 | 0 | 1  | 4  | 1  | 4  | 1  |
| 3 | 0 | 2  | 3  | 2  | 3  | 3  |
| 3 | 0 | 4  | 4  | 1  | 4  | 1  |
| 2 | 0 | 2  | 4  | 1  | 3  | 3  |
| 3 | 0 | 2  | 4  | 1  | 3  | 2  |
| 3 | 0 | 3  | 4  | 1  | 1  | 1  |
| 3 | 0 | 3  | 4  | 1  | 4  | 1  |
| 3 | 0 | 1  | 4  | 1  | 4  | 2  |
| 3 | 0 | 1  | 1  | 1  | 1  | 1  |
| 3 | 0 | 1  | 4  | 1  | 4  | 2  |
| 3 | 0 | 2  | 4  | 1  | 4  | 1  |
| 3 | 0 | 1  | 4  | 1  | 4  | 1  |
| 3 | 0 | 1  | 4  | 1  | 4  | 1  |
| 3 | 0 | 1  | 4  | 2  | 4  | 2  |
| 3 | 0 | 99 | 4  | 1  | 4  | 2  |

|    |    |    |    |    |    |    |
|----|----|----|----|----|----|----|
| 3  | 0  | 4  | 4  | 1  | 4  | 1  |
| 3  | 0  | 2  | 3  | 1  | 4  | 3  |
| 3  | 0  | 1  | 4  | 1  | 1  | 1  |
| 3  | 0  | 1  | 4  | 1  | 4  | 1  |
| 2  | 0  | 99 | 4  | 2  | 4  | 2  |
| 3  | 0  | 1  | 4  | 2  | 2  | 1  |
| 0  | 0  | 2  | 2  | 2  | 2  | 2  |
| 3  | 0  | 3  | 4  | 1  | 3  | 2  |
| 3  | 0  | 3  | 3  | 1  | 99 | 99 |
| 3  | 0  | 3  | 1  | 2  | 1  | 4  |
| 3  | 0  | 1  | 4  | 1  | 4  | 1  |
| 3  | 0  | 1  | 1  | 1  | 1  | 1  |
| 0  | 0  | 1  | 3  | 2  | 3  | 2  |
| 3  | 0  | 1  | 4  | 2  | 2  | 2  |
| 3  | 0  | 2  | 2  | 1  | 3  | 1  |
| 3  | 0  | 2  | 2  | 1  | 2  | 2  |
| 3  | 0  | 1  | 99 | 1  | 1  | 1  |
| 3  | 0  | 1  | 4  | 1  | 4  | 3  |
| 3  | 0  | 1  | 4  | 1  | 4  | 1  |
| 3  | 0  | 2  | 3  | 1  | 3  | 2  |
| 0  | 0  | 4  | 4  | 4  | 3  | 3  |
| 3  | 0  | 3  | 3  | 2  | 3  | 3  |
| 3  | 0  | 1  | 4  | 1  | 4  | 1  |
| 3  | 0  | 1  | 4  | 1  | 1  | 1  |
| 3  | 0  | 1  | 4  | 1  | 4  | 1  |
| 3  | 0  | 1  | 4  | 1  | 1  | 1  |
| 3  | 0  | 2  | 3  | 2  | 3  | 2  |
| 3  | 0  | 3  | 3  | 99 | 3  | 4  |
| 3  | 0  | 1  | 4  | 1  | 4  | 1  |
| 3  | 0  | 4  | 4  | 1  | 4  | 2  |
| 3  | 0  | 99 | 99 | 99 | 99 | 99 |
| 3  | 0  | 1  | 4  | 2  | 3  | 1  |
| 0  | 0  | 2  | 3  | 2  | 3  | 2  |
| 3  | 0  | 4  | 3  | 1  | 4  | 1  |
| 3  | 0  | 4  | 4  | 1  | 4  | 1  |
| 3  | 0  | 1  | 4  | 1  | 4  | 1  |
| 0  | 2  | 1  | 4  | 1  | 3  | 1  |
| 0  | 0  | 2  | 2  | 2  | 2  | 2  |
| 3  | 0  | 4  | 4  | 4  | 4  | 1  |
| 3  | 0  | 1  | 1  | 1  | 4  | 1  |
| 3  | 0  | 1  | 4  | 1  | 4  | 1  |
| 99 | 99 | 4  | 3  | 3  | 3  | 4  |
| 3  | 0  | 1  | 4  | 1  | 4  | 1  |
| 3  | 0  | 1  | 4  | 1  | 4  | 1  |
| 3  | 0  | 1  | 4  | 1  | 4  | 1  |
| 3  | 0  | 1  | 4  | 1  | 4  | 4  |
| 3  | 0  | 4  | 4  | 4  | 4  | 1  |
| 3  | 0  | 1  | 4  | 1  | 4  | 1  |

|   |   |   |   |   |   |    |
|---|---|---|---|---|---|----|
| 3 | 0 | 1 | 4 | 1 | 4 | 1  |
| 3 | 0 | 1 | 4 | 1 | 4 | 1  |
| 2 | 2 | 1 | 4 | 4 | 1 | 1  |
| 2 | 0 | 3 | 3 | 2 | 3 | 2  |
| 3 | 0 | 1 | 3 | 1 | 4 | 1  |
| 3 | 0 | 4 | 4 | 1 | 4 | 1  |
| 3 | 0 | 1 | 3 | 2 | 3 | 2  |
| 3 | 0 | 1 | 4 | 1 | 4 | 1  |
| 3 | 0 | 3 | 3 | 3 | 3 | 3  |
| 3 | 0 | 1 | 4 | 1 | 4 | 1  |
| 3 | 0 | 3 | 4 | 1 | 4 | 1  |
| 3 | 0 | 1 | 1 | 1 | 4 | 2  |
| 3 | 0 | 1 | 4 | 1 | 4 | 1  |
| 1 | 1 | 2 | 4 | 2 | 4 | 2  |
| 3 | 0 | 4 | 4 | 1 | 4 | 1  |
| 3 | 0 | 1 | 4 | 1 | 4 | 1  |
| 3 | 0 | 1 | 4 | 1 | 4 | 1  |
| 3 | 0 | 1 | 4 | 1 | 4 | 1  |
| 3 | 0 | 1 | 4 | 1 | 4 | 1  |
| 3 | 0 | 1 | 4 | 1 | 3 | 1  |
| 3 | 0 | 1 | 4 | 1 | 4 | 2  |
| 3 | 0 | 1 | 4 | 1 | 4 | 1  |
| 3 | 0 | 2 | 3 | 2 | 2 | 2  |
| 2 | 2 | 1 | 2 | 2 | 2 | 2  |
| 3 | 0 | 1 | 4 | 1 | 4 | 2  |
| 3 | 1 | 1 | 4 | 1 | 4 | 2  |
| 3 | 0 | 1 | 4 | 1 | 4 | 1  |
| 3 | 0 | 1 | 4 | 1 | 4 | 1  |
| 3 | 0 | 1 | 4 | 1 | 1 | 1  |
| 3 | 0 | 1 | 4 | 1 | 4 | 1  |
| 3 | 0 | 1 | 4 | 1 | 4 | 1  |
| 3 | 0 | 1 | 4 | 1 | 4 | 1  |
| 3 | 0 | 1 | 4 | 1 | 4 | 1  |
| 2 | 2 | 1 | 4 | 1 | 4 | 1  |
| 3 | 0 | 1 | 4 | 1 | 4 | 1  |
| 3 | 0 | 1 | 4 | 1 | 4 | 1  |
| 3 | 0 | 4 | 4 | 2 | 3 | 1  |
| 3 | 1 | 1 | 4 | 1 | 4 | 1  |
| 3 | 0 | 2 | 4 | 1 | 4 | 1  |
| 3 | 0 | 3 | 3 | 2 | 3 | 2  |
| 3 | 0 | 2 | 3 | 2 | 4 | 1  |
| 3 | 0 | 1 | 4 | 1 | 4 | 1  |
| 3 | 0 | 2 | 3 | 2 | 4 | 2  |
| 1 | 1 | 1 | 3 | 2 | 3 | 2  |
| 3 | 0 | 1 | 4 | 1 | 4 | 1  |
| 3 | 0 | 1 | 3 | 1 | 4 | 99 |
| 3 | 0 | 1 | 4 | 1 | 4 | 3  |
| 3 | 0 | 1 | 4 | 1 | 4 | 1  |
| 0 | 0 | 4 | 4 | 1 | 4 | 1  |
| 3 | 0 | 4 | 4 | 2 | 1 | 1  |

|    |    |    |    |    |    |    |
|----|----|----|----|----|----|----|
| 3  | 0  | 2  | 3  | 2  | 3  | 2  |
| 3  | 0  | 1  | 4  | 1  | 4  | 1  |
| 3  | 0  | 1  | 4  | 1  | 4  | 2  |
| 2  | 0  | 1  | 4  | 1  | 4  | 1  |
| 0  | 0  | 2  | 3  | 2  | 3  | 2  |
| 3  | 0  | 1  | 4  | 1  | 4  | 1  |
| 3  | 0  | 1  | 4  | 1  | 4  | 1  |
| 0  | 0  | 2  | 3  | 99 | 99 | 3  |
| 3  | 0  | 2  | 3  | 2  | 3  | 2  |
| 0  | 0  | 1  | 4  | 2  | 3  | 1  |
| 3  | 0  | 1  | 4  | 1  | 4  | 99 |
| 0  | 0  | 99 | 2  | 2  | 2  | 2  |
| 3  | 0  | 2  | 3  | 2  | 3  | 2  |
| 2  | 0  | 3  | 2  | 2  | 3  | 3  |
| 3  | 2  | 1  | 4  | 1  | 4  | 4  |
| 3  | 0  | 1  | 4  | 1  | 4  | 1  |
| 3  | 0  | 1  | 4  | 1  | 4  | 1  |
| 3  | 0  | 99 | 99 | 99 | 99 | 99 |
| 3  | 0  | 1  | 99 | 1  | 4  | 1  |
| 3  | 0  | 1  | 4  | 1  | 4  | 1  |
| 3  | 0  | 2  | 2  | 2  | 3  | 3  |
| 3  | 0  | 1  | 4  | 1  | 4  | 1  |
| 3  | 0  | 2  | 4  | 1  | 4  | 2  |
| 99 | 99 | 1  | 4  | 1  | 4  | 1  |
| 3  | 0  | 1  | 4  | 2  | 4  | 1  |
| 3  | 0  | 2  | 99 | 2  | 3  | 2  |
| 3  | 0  | 1  | 3  | 1  | 4  | 1  |
| 3  | 0  | 4  | 4  | 1  | 4  | 1  |
| 3  | 0  | 1  | 4  | 1  | 4  | 1  |
| 3  | 0  | 99 | 4  | 1  | 4  | 1  |
| 3  | 0  | 4  | 1  | 4  | 4  | 1  |
| 3  | 0  | 3  | 4  | 2  | 2  | 3  |
| 3  | 0  | 3  | 1  | 1  | 4  | 4  |
| 3  | 0  | 1  | 3  | 1  | 3  | 1  |
| 1  | 99 | 1  | 4  | 1  | 4  | 1  |
| 0  | 1  | 2  | 2  | 2  | 3  | 2  |
| 3  | 0  | 2  | 4  | 2  | 3  | 2  |
| 2  | 2  | 3  | 3  | 2  | 3  | 2  |
| 3  | 0  | 4  | 4  | 1  | 4  | 1  |
| 0  | 0  | 2  | 4  | 2  | 4  | 1  |
| 3  | 0  | 4  | 4  | 2  | 4  | 4  |
| 3  | 0  | 2  | 4  | 1  | 4  | 1  |
| 3  | 0  | 4  | 4  | 2  | 3  | 2  |
| 3  | 0  | 4  | 4  | 1  | 4  | 1  |
| 3  | 0  | 1  | 4  | 1  | 4  | 2  |
| 3  | 0  | 3  | 4  | 1  | 3  | 1  |
| 3  | 0  | 1  | 4  | 1  | 4  | 1  |
| 3  | 0  | 1  | 4  | 1  | 4  | 1  |

|    |   |    |    |    |    |    |
|----|---|----|----|----|----|----|
| 3  | 0 | 3  | 3  | 2  | 3  | 3  |
| 3  | 0 | 4  | 4  | 1  | 4  | 1  |
| 3  | 0 | 2  | 4  | 2  | 4  | 99 |
| 3  | 0 | 3  | 2  | 2  | 4  | 99 |
| 3  | 0 | 1  | 4  | 1  | 4  | 1  |
| 0  | 0 | 2  | 4  | 2  | 3  | 2  |
| 3  | 0 | 3  | 3  | 2  | 3  | 2  |
| 3  | 0 | 99 | 3  | 2  | 3  | 2  |
| 3  | 0 | 3  | 4  | 2  | 3  | 1  |
| 3  | 0 | 99 | 4  | 1  | 4  | 2  |
| 3  | 0 | 1  | 4  | 1  | 4  | 1  |
| 3  | 0 | 1  | 4  | 1  | 4  | 1  |
| 3  | 0 | 1  | 4  | 1  | 99 | 99 |
| 3  | 0 | 3  | 4  | 1  | 1  | 2  |
| 1  | 1 | 1  | 1  | 1  | 4  | 1  |
| 3  | 0 | 1  | 4  | 1  | 4  | 1  |
| 3  | 0 | 3  | 3  | 2  | 3  | 3  |
| 3  | 0 | 1  | 4  | 1  | 4  | 1  |
| 3  | 0 | 4  | 4  | 1  | 4  | 1  |
| 3  | 0 | 1  | 4  | 1  | 4  | 1  |
| 3  | 0 | 1  | 4  | 1  | 4  | 1  |
| 3  | 0 | 1  | 4  | 1  | 4  | 1  |
| 0  | 1 | 3  | 3  | 2  | 3  | 2  |
| 1  | 1 | 2  | 3  | 3  | 2  | 2  |
| 2  | 2 | 2  | 1  | 1  | 1  | 1  |
| 3  | 0 | 2  | 3  | 2  | 3  | 2  |
| 0  | 0 | 2  | 3  | 2  | 3  | 2  |
| 3  | 0 | 2  | 3  | 2  | 3  | 2  |
| 0  | 0 | 99 | 99 | 99 | 99 | 99 |
| 0  | 0 | 99 | 4  | 2  | 4  | 2  |
| 3  | 0 | 4  | 4  | 1  | 4  | 1  |
| 3  | 0 | 3  | 3  | 2  | 3  | 3  |
| 2  | 2 | 2  | 4  | 1  | 4  | 1  |
| 1  | 0 | 2  | 4  | 1  | 4  | 1  |
| 0  | 0 | 4  | 4  | 1  | 4  | 1  |
| 1  | 1 | 1  | 4  | 1  | 4  | 1  |
| 1  | 1 | 1  | 4  | 1  | 4  | 2  |
| 3  | 0 | 2  | 4  | 1  | 4  | 1  |
| 3  | 0 | 1  | 1  | 1  | 1  | 3  |
| 3  | 0 | 2  | 4  | 1  | 4  | 1  |
| 3  | 0 | 1  | 4  | 2  | 3  | 2  |
| 3  | 0 | 1  | 4  | 1  | 4  | 1  |
| 3  | 0 | 3  | 3  | 2  | 2  | 2  |
| 3  | 0 | 2  | 4  | 1  | 4  | 1  |
| 3  | 0 | 1  | 3  | 2  | 3  | 1  |
| 3  | 0 | 1  | 4  | 1  | 4  | 1  |
| 99 | 0 | 3  | 4  | 1  | 4  | 1  |
| 3  | 0 | 3  | 4  | 1  | 4  | 2  |

|    |    |    |    |    |    |    |
|----|----|----|----|----|----|----|
| 3  | 0  | 4  | 4  | 1  | 99 | 1  |
| 3  | 0  | 3  | 3  | 2  | 2  | 3  |
| 3  | 0  | 3  | 3  | 3  | 4  | 3  |
| 3  | 0  | 2  | 3  | 2  | 3  | 2  |
| 3  | 0  | 2  | 3  | 1  | 4  | 3  |
| 99 | 99 | 99 | 99 | 99 | 99 | 99 |
| 2  | 1  | 1  | 4  | 1  | 4  | 1  |
| 3  | 0  | 1  | 4  | 1  | 4  | 1  |
| 3  | 0  | 1  | 4  | 1  | 4  | 1  |
| 3  | 0  | 4  | 4  | 1  | 4  | 4  |
| 3  | 0  | 1  | 1  | 1  | 1  | 1  |
| 3  | 0  | 99 | 99 | 99 | 99 | 99 |
| 0  | 1  | 1  | 4  | 1  | 4  | 1  |
| 0  | 0  | 2  | 4  | 2  | 4  | 1  |
| 3  | 0  | 1  | 4  | 1  | 3  | 3  |
| 3  | 0  | 3  | 4  | 1  | 4  | 2  |
| 3  | 0  | 1  | 4  | 1  | 4  | 1  |
| 3  | 0  | 3  | 1  | 1  | 1  | 1  |
| 3  | 0  | 1  | 4  | 1  | 3  | 2  |
| 3  | 0  | 3  | 3  | 2  | 3  | 2  |
| 3  | 0  | 3  | 4  | 1  | 4  | 1  |
| 3  | 0  | 99 | 4  | 1  | 4  | 1  |
| 3  | 0  | 1  | 4  | 1  | 3  | 2  |
| 3  | 0  | 3  | 3  | 1  | 3  | 1  |
| 3  | 0  | 1  | 3  | 2  | 3  | 2  |
| 3  | 0  | 1  | 4  | 2  | 2  | 1  |
| 3  | 0  | 1  | 4  | 1  | 4  | 1  |
| 99 | 99 | 1  | 1  | 1  | 99 | 1  |
| 3  | 0  | 2  | 99 | 99 | 3  | 1  |
| 3  | 0  | 1  | 1  | 1  | 1  | 1  |
| 3  | 0  | 1  | 4  | 1  | 4  | 1  |
| 3  | 0  | 1  | 4  | 1  | 4  | 4  |
| 3  | 0  | 1  | 4  | 1  | 1  | 1  |
| 3  | 0  | 4  | 4  | 1  | 4  | 1  |
| 3  | 0  | 3  | 3  | 2  | 3  | 1  |
| 3  | 0  | 1  | 4  | 1  | 4  | 1  |
| 3  | 0  | 4  | 4  | 1  | 4  | 1  |
| 2  | 2  | 2  | 1  | 2  | 3  | 2  |
| 3  | 0  | 1  | 4  | 1  | 4  | 1  |
| 3  | 0  | 1  | 4  | 2  | 3  | 2  |
| 3  | 0  | 3  | 4  | 1  | 4  | 2  |
| 3  | 0  | 1  | 3  | 2  | 4  | 1  |
| 3  | 0  | 2  | 3  | 2  | 3  | 2  |
| 3  | 0  | 2  | 3  | 1  | 3  | 1  |
| 3  | 0  | 1  | 4  | 1  | 4  | 1  |
| 3  | 0  | 1  | 4  | 1  | 4  | 1  |
| 3  | 0  | 1  | 4  | 1  | 4  | 1  |
| 3  | 0  | 1  | 4  | 1  | 4  | 1  |



|    |    |    |    |    |    |    |
|----|----|----|----|----|----|----|
| 3  | 0  | 99 | 4  | 1  | 4  | 1  |
| 3  | 0  | 99 | 4  | 1  | 4  | 1  |
| 3  | 0  | 1  | 3  | 1  | 4  | 1  |
| 3  | 0  | 1  | 4  | 1  | 1  | 1  |
| 3  | 0  | 1  | 4  | 1  | 4  | 1  |
| 3  | 1  | 1  | 4  | 2  | 1  | 1  |
| 3  | 0  | 1  | 4  | 2  | 3  | 2  |
| 3  | 0  | 2  | 3  | 2  | 3  | 2  |
| 3  | 0  | 2  | 3  | 3  | 3  | 3  |
| 3  | 0  | 1  | 4  | 1  | 4  | 1  |
| 3  | 0  | 99 | 99 | 99 | 99 | 99 |
| 3  | 0  | 1  | 4  | 1  | 4  | 1  |
| 3  | 0  | 3  | 3  | 3  | 2  | 2  |
| 3  | 0  | 99 | 3  | 2  | 2  | 2  |
| 3  | 0  | 1  | 1  | 1  | 1  | 1  |
| 3  | 0  | 4  | 4  | 4  | 4  | 4  |
| 0  | 1  | 3  | 3  | 1  | 3  | 1  |
| 3  | 0  | 1  | 4  | 1  | 4  | 1  |
| 3  | 0  | 2  | 3  | 2  | 3  | 2  |
| 3  | 0  | 3  | 4  | 2  | 4  | 2  |
| 3  | 0  | 3  | 3  | 3  | 3  | 3  |
| 3  | 0  | 99 | 1  | 1  | 2  | 1  |
| 1  | 0  | 1  | 4  | 1  | 2  | 2  |
| 2  | 99 | 3  | 3  | 3  | 3  | 3  |
| 3  | 0  | 2  | 3  | 2  | 3  | 1  |
| 3  | 2  | 1  | 4  | 1  | 4  | 1  |
| 3  | 0  | 2  | 4  | 1  | 4  | 1  |
| 3  | 0  | 1  | 4  | 1  | 4  | 1  |
| 2  | 0  | 99 | 99 | 99 | 99 | 99 |
| 2  | 2  | 2  | 3  | 2  | 3  | 2  |
| 3  | 0  | 1  | 4  | 1  | 4  | 1  |
| 3  | 0  | 99 | 4  | 4  | 4  | 1  |
| 3  | 2  | 3  | 4  | 2  | 1  | 1  |
| 3  | 0  | 2  | 3  | 2  | 3  | 3  |
| 3  | 0  | 1  | 1  | 1  | 1  | 1  |
| 3  | 0  | 2  | 4  | 1  | 4  | 1  |
| 99 | 2  | 4  | 4  | 4  | 4  | 2  |
| 3  | 0  | 4  | 4  | 1  | 4  | 1  |
| 3  | 0  | 1  | 4  | 1  | 4  | 1  |
| 3  | 0  | 1  | 4  | 1  | 4  | 1  |
| 3  | 0  | 1  | 4  | 1  | 4  | 1  |
| 3  | 0  | 3  | 4  | 1  | 4  | 1  |
| 1  | 0  | 1  | 3  | 1  | 4  | 1  |
| 3  | 0  | 4  | 4  | 3  | 3  | 1  |
| 3  | 0  | 1  | 4  | 1  | 4  | 1  |
| 3  | 0  | 1  | 4  | 1  | 1  | 1  |
| 3  | 0  | 2  | 4  | 1  | 3  | 1  |
| 3  | 0  | 2  | 1  | 1  | 1  | 1  |

|   |   |    |    |    |   |   |
|---|---|----|----|----|---|---|
| 3 | 0 | 1  | 4  | 1  | 4 | 1 |
| 3 | 0 | 99 | 99 | 99 | 4 | 1 |
| 3 | 0 | 1  | 4  | 1  | 4 | 1 |
| 3 | 0 | 1  | 4  | 1  | 4 | 1 |
| 3 | 0 | 1  | 4  | 1  | 4 | 2 |
| 3 | 0 | 1  | 4  | 1  | 4 | 2 |
| 3 | 0 | 1  | 4  | 1  | 4 | 1 |
| 3 | 0 | 1  | 4  | 1  | 4 | 1 |
| 0 | 1 | 2  | 3  | 2  | 3 | 1 |
| 3 | 0 | 2  | 4  | 1  | 4 | 2 |
| 3 | 0 | 1  | 3  | 1  | 4 | 1 |
| 3 | 0 | 2  | 3  | 1  | 3 | 2 |
| 3 | 0 | 1  | 4  | 1  | 4 | 1 |
| 3 | 0 | 1  | 4  | 1  | 4 | 1 |
| 3 | 0 | 2  | 3  | 2  | 3 | 2 |
| 3 | 0 | 1  | 4  | 1  | 4 | 1 |
| 3 | 0 | 2  | 3  | 1  | 4 | 1 |
| 3 | 0 | 1  | 4  | 1  | 4 | 1 |
| 3 | 1 | 1  | 4  | 1  | 4 | 1 |
| 3 | 0 | 1  | 4  | 1  | 4 | 1 |
| 0 | 1 | 2  | 3  | 2  | 3 | 2 |
| 3 | 0 | 2  | 4  | 1  | 4 | 1 |
| 3 | 0 | 3  | 3  | 1  | 3 | 2 |
| 2 | 2 | 1  | 4  | 1  | 4 | 2 |
| 3 | 0 | 1  | 4  | 1  | 4 | 1 |
| 3 | 0 | 2  | 3  | 1  | 4 | 1 |
| 0 | 0 | 2  | 3  | 2  | 3 | 2 |
| 3 | 0 | 2  | 4  | 1  | 4 | 1 |
| 2 | 2 | 2  | 4  | 1  | 4 | 2 |
| 3 | 0 | 1  | 4  | 1  | 4 | 1 |
| 3 | 0 | 1  | 1  | 1  | 4 | 1 |
| 3 | 0 | 4  | 4  | 1  | 3 | 1 |
| 3 | 0 | 2  | 4  | 4  | 3 | 2 |
| 3 | 0 | 2  | 4  | 1  | 4 | 1 |
| 3 | 0 | 1  | 4  | 1  | 4 | 1 |
| 3 | 0 | 2  | 3  | 2  | 3 | 2 |
| 3 | 0 | 1  | 1  | 1  | 4 | 2 |
| 3 | 0 | 1  | 4  | 1  | 4 | 1 |
| 3 | 0 | 1  | 99 | 99 | 4 | 1 |
| 3 | 0 | 2  | 1  | 1  | 1 | 1 |
| 2 | 0 | 1  | 4  | 1  | 4 | 2 |
| 3 | 0 | 2  | 2  | 3  | 3 | 1 |
| 0 | 0 | 3  | 4  | 4  | 4 | 4 |
| 3 | 0 | 2  | 3  | 2  | 2 | 3 |
| 3 | 0 | 4  | 4  | 1  | 1 | 1 |

|    |    |    |    |    |    |    |
|----|----|----|----|----|----|----|
| 3  | 0  | 1  | 1  | 1  | 3  | 4  |
| 3  | 0  | 1  | 4  | 1  | 4  | 2  |
| 3  | 0  | 1  | 4  | 1  | 4  | 1  |
| 3  | 0  | 99 | 99 | 1  | 3  | 1  |
| 2  | 0  | 2  | 3  | 1  | 4  | 1  |
| 3  | 0  | 99 | 4  | 2  | 3  | 1  |
| 2  | 2  | 99 | 99 | 99 | 4  | 99 |
| 3  | 0  | 2  | 99 | 99 | 4  | 2  |
| 1  | 0  | 1  | 4  | 1  | 4  | 1  |
| 0  | 1  | 4  | 4  | 4  | 4  | 4  |
| 3  | 0  | 1  | 4  | 1  | 4  | 1  |
| 2  | 2  | 1  | 4  | 1  | 3  | 1  |
| 3  | 0  | 1  | 4  | 1  | 4  | 1  |
| 3  | 0  | 1  | 4  | 2  | 3  | 1  |
| 3  | 0  | 4  | 4  | 4  | 4  | 4  |
| 3  | 0  | 1  | 4  | 1  | 4  | 1  |
| 3  | 0  | 1  | 4  | 1  | 1  | 1  |
| 3  | 0  | 2  | 2  | 2  | 2  | 2  |
| 3  | 0  | 1  | 1  | 1  | 4  | 1  |
| 0  | 99 | 1  | 4  | 1  | 4  | 2  |
| 3  | 0  | 1  | 4  | 1  | 4  | 1  |
| 3  | 0  | 2  | 4  | 1  | 4  | 1  |
| 3  | 0  | 1  | 3  | 1  | 4  | 2  |
| 3  | 0  | 1  | 4  | 1  | 4  | 1  |
| 99 | 99 | 99 | 99 | 99 | 99 | 99 |
| 3  | 0  | 1  | 3  | 1  | 3  | 2  |
| 3  | 0  | 1  | 3  | 1  | 4  | 2  |
| 3  | 0  | 4  | 3  | 1  | 4  | 3  |
| 3  | 0  | 1  | 4  | 1  | 4  | 1  |
| 3  | 0  | 1  | 4  | 1  | 4  | 1  |
| 3  | 0  | 1  | 3  | 99 | 99 | 1  |
| 3  | 0  | 1  | 1  | 99 | 4  | 99 |
| 3  | 0  | 1  | 4  | 1  | 4  | 1  |
| 3  | 0  | 2  | 4  | 2  | 2  | 2  |
| 0  | 0  | 2  | 2  | 2  | 2  | 2  |
| 3  | 1  | 1  | 3  | 3  | 3  | 2  |
| 3  | 0  | 3  | 3  | 2  | 3  | 2  |
| 3  | 0  | 3  | 2  | 2  | 3  | 1  |
| 3  | 0  | 2  | 3  | 1  | 3  | 2  |
| 3  | 0  | 4  | 2  | 3  | 3  | 4  |
| 3  | 0  | 2  | 4  | 1  | 4  | 1  |
| 2  | 2  | 99 | 3  | 2  | 3  | 2  |
| 3  | 0  | 1  | 4  | 1  | 3  | 1  |
| 3  | 0  | 3  | 4  | 2  | 3  | 2  |
| 3  | 2  | 1  | 4  | 1  | 4  | 1  |
| 3  | 0  | 1  | 4  | 1  | 1  | 1  |
| 3  | 0  | 4  | 4  | 1  | 1  | 1  |
| 3  | 0  | 2  | 4  | 1  | 4  | 1  |

|    |    |    |    |    |    |    |
|----|----|----|----|----|----|----|
| 3  | 0  | 2  | 4  | 1  | 1  | 1  |
| 3  | 0  | 1  | 4  | 1  | 4  | 1  |
| 99 | 99 | 99 | 4  | 1  | 4  | 99 |
| 3  | 0  | 1  | 4  | 2  | 4  | 2  |
| 3  | 0  | 1  | 4  | 1  | 4  | 1  |
| 3  | 0  | 1  | 4  | 1  | 4  | 1  |
| 3  | 0  | 2  | 3  | 2  | 4  | 2  |
| 3  | 0  | 2  | 4  | 99 | 4  | 2  |
| 3  | 0  | 1  | 1  | 1  | 4  | 1  |
| 2  | 2  | 2  | 3  | 2  | 3  | 2  |
| 3  | 0  | 4  | 4  | 1  | 4  | 1  |
| 3  | 0  | 1  | 4  | 1  | 4  | 1  |
| 3  | 0  | 1  | 4  | 1  | 4  | 1  |
| 3  | 0  | 1  | 4  | 1  | 1  | 1  |
| 3  | 0  | 1  | 4  | 1  | 4  | 1  |
| 3  | 0  | 1  | 4  | 1  | 4  | 1  |
| 3  | 0  | 1  | 4  | 1  | 4  | 1  |
| 3  | 0  | 1  | 4  | 1  | 4  | 1  |
| 3  | 0  | 2  | 4  | 1  | 4  | 1  |
| 3  | 0  | 1  | 4  | 1  | 4  | 1  |
| 3  | 0  | 3  | 3  | 2  | 3  | 2  |
| 3  | 0  | 1  | 1  | 99 | 4  | 1  |
| 3  | 0  | 4  | 4  | 1  | 4  | 1  |
| 2  | 2  | 4  | 4  | 4  | 4  | 4  |
| 3  | 0  | 1  | 4  | 1  | 4  | 1  |
| 3  | 0  | 2  | 3  | 2  | 3  | 2  |
| 3  | 0  | 1  | 4  | 1  | 4  | 1  |
| 3  | 1  | 4  | 4  | 4  | 4  | 4  |
| 3  | 0  | 1  | 4  | 1  | 4  | 1  |
| 3  | 0  | 2  | 4  | 1  | 4  | 1  |
| 3  | 0  | 4  | 4  | 1  | 4  | 1  |
| 0  | 2  | 2  | 3  | 1  | 4  | 2  |
| 3  | 0  | 1  | 4  | 1  | 4  | 1  |
| 0  | 0  | 3  | 4  | 2  | 4  | 1  |
| 3  | 0  | 99 | 4  | 1  | 4  | 99 |
| 3  | 0  | 99 | 99 | 99 | 99 | 99 |
| 3  | 0  | 2  | 3  | 2  | 3  | 2  |
| 3  | 0  | 1  | 4  | 1  | 4  | 1  |
| 3  | 0  | 2  | 4  | 1  | 4  | 1  |
| 3  | 0  | 1  | 4  | 1  | 4  | 2  |
| 3  | 0  | 4  | 4  | 1  | 4  | 1  |
| 3  | 0  | 1  | 1  | 1  | 4  | 1  |
| 1  | 0  | 2  | 4  | 1  | 4  | 2  |
| 3  | 0  | 1  | 2  | 2  | 3  | 2  |
| 3  | 0  | 2  | 3  | 2  | 3  | 2  |
| 99 | 99 | 4  | 4  | 4  | 4  | 4  |
| 99 | 99 | 99 | 99 | 99 | 99 | 99 |
| 3  | 0  | 3  | 4  | 1  | 4  | 1  |

|    |    |    |    |    |    |    |
|----|----|----|----|----|----|----|
| 3  | 0  | 2  | 2  | 2  | 2  | 2  |
| 3  | 0  | 1  | 99 | 1  | 4  | 1  |
| 3  | 0  | 1  | 4  | 1  | 1  | 1  |
| 1  | 0  | 2  | 4  | 1  | 3  | 1  |
| 3  | 0  | 1  | 4  | 1  | 4  | 1  |
| 3  | 0  | 1  | 4  | 1  | 4  | 1  |
| 3  | 0  | 2  | 4  | 2  | 4  | 1  |
| 3  | 0  | 1  | 4  | 1  | 4  | 1  |
| 3  | 0  | 1  | 4  | 2  | 4  | 2  |
| 3  | 0  | 2  | 99 | 3  | 2  | 3  |
| 1  | 1  | 2  | 4  | 1  | 3  | 1  |
| 2  | 2  | 1  | 2  | 1  | 3  | 3  |
| 3  | 0  | 1  | 4  | 1  | 4  | 1  |
| 3  | 0  | 1  | 4  | 1  | 4  | 1  |
| 3  | 0  | 1  | 4  | 1  | 4  | 2  |
| 0  | 0  | 2  | 2  | 2  | 2  | 2  |
| 3  | 0  | 99 | 99 | 1  | 4  | 1  |
| 3  | 0  | 1  | 4  | 1  | 4  | 1  |
| 2  | 2  | 1  | 4  | 1  | 4  | 1  |
| 3  | 0  | 4  | 4  | 1  | 4  | 1  |
| 2  | 2  | 2  | 2  | 2  | 3  | 3  |
| 3  | 0  | 1  | 4  | 1  | 4  | 1  |
| 3  | 0  | 2  | 99 | 99 | 99 | 99 |
| 3  | 0  | 1  | 4  | 1  | 4  | 1  |
| 0  | 0  | 2  | 4  | 1  | 4  | 2  |
| 3  | 0  | 1  | 4  | 1  | 4  | 99 |
| 0  | 0  | 4  | 4  | 1  | 4  | 1  |
| 3  | 0  | 1  | 3  | 2  | 3  | 99 |
| 3  | 0  | 2  | 2  | 2  | 2  | 2  |
| 3  | 0  | 1  | 1  | 1  | 1  | 1  |
| 99 | 99 | 99 | 99 | 99 | 99 | 99 |
| 3  | 0  | 4  | 4  | 1  | 4  | 1  |
| 3  | 0  | 99 | 4  | 1  | 4  | 4  |
| 3  | 0  | 1  | 4  | 1  | 4  | 1  |
| 3  | 0  | 99 | 99 | 99 | 99 | 99 |
| 3  | 0  | 99 | 3  | 2  | 2  | 2  |
| 99 | 99 | 4  | 4  | 1  | 4  | 1  |
| 3  | 0  | 2  | 4  | 1  | 4  | 2  |
| 3  | 0  | 1  | 4  | 1  | 4  | 1  |
| 3  | 0  | 1  | 4  | 1  | 4  | 1  |
| 3  | 0  | 1  | 1  | 1  | 1  | 1  |
| 3  | 0  | 1  | 4  | 1  | 4  | 1  |
| 3  | 0  | 1  | 3  | 1  | 3  | 2  |
| 3  | 0  | 1  | 4  | 1  | 4  | 1  |
| 3  | 0  | 1  | 1  | 1  | 1  | 3  |
| 3  | 0  | 1  | 4  | 1  | 4  | 1  |
| 3  | 0  | 1  | 4  | 1  | 4  | 1  |
| 3  | 0  | 1  | 1  | 1  | 1  | 2  |

|   |    |    |    |    |    |    |
|---|----|----|----|----|----|----|
| 0 | 2  | 1  | 4  | 1  | 4  | 2  |
| 3 | 0  | 2  | 3  | 2  | 3  | 2  |
| 3 | 0  | 1  | 4  | 1  | 4  | 1  |
| 2 | 0  | 1  | 3  | 2  | 1  | 1  |
| 3 | 0  | 2  | 4  | 1  | 3  | 2  |
| 3 | 0  | 1  | 99 | 99 | 4  | 1  |
| 3 | 0  | 1  | 3  | 1  | 3  | 1  |
| 3 | 0  | 1  | 1  | 1  | 4  | 2  |
| 3 | 0  | 4  | 3  | 2  | 4  | 2  |
| 2 | 0  | 4  | 99 | 1  | 99 | 3  |
| 0 | 0  | 2  | 3  | 2  | 3  | 2  |
| 3 | 0  | 4  | 4  | 4  | 4  | 1  |
| 3 | 0  | 1  | 4  | 1  | 4  | 1  |
| 3 | 0  | 2  | 3  | 2  | 3  | 3  |
| 3 | 0  | 2  | 3  | 2  | 3  | 2  |
| 3 | 0  | 1  | 2  | 2  | 2  | 2  |
| 2 | 0  | 2  | 4  | 1  | 3  | 3  |
| 3 | 0  | 2  | 3  | 2  | 3  | 2  |
| 3 | 0  | 2  | 4  | 2  | 4  | 2  |
| 3 | 0  | 1  | 1  | 1  | 1  | 1  |
| 1 | 0  | 1  | 4  | 1  | 4  | 2  |
| 3 | 0  | 3  | 4  | 3  | 3  | 3  |
| 3 | 0  | 1  | 3  | 2  | 3  | 2  |
| 3 | 0  | 2  | 4  | 2  | 3  | 2  |
| 3 | 0  | 1  | 4  | 4  | 3  | 2  |
| 3 | 0  | 3  | 2  | 3  | 3  | 2  |
| 3 | 0  | 1  | 4  | 1  | 4  | 1  |
| 3 | 0  | 99 | 3  | 2  | 3  | 2  |
| 3 | 99 | 99 | 99 | 1  | 4  | 99 |
| 3 | 0  | 1  | 3  | 1  | 4  | 2  |
| 3 | 0  | 1  | 4  | 1  | 4  | 2  |
| 3 | 0  | 1  | 4  | 1  | 4  | 1  |
| 3 | 0  | 2  | 4  | 1  | 4  | 3  |
| 3 | 0  | 99 | 3  | 2  | 3  | 2  |
| 3 | 0  | 99 | 3  | 1  | 3  | 1  |
| 3 | 0  | 2  | 3  | 2  | 3  | 2  |
| 0 | 0  | 2  | 2  | 2  | 2  | 2  |
| 3 | 0  | 1  | 1  | 1  | 4  | 1  |
| 3 | 0  | 2  | 1  | 1  | 4  | 1  |
| 3 | 0  | 1  | 4  | 1  | 4  | 1  |
| 1 | 1  | 1  | 4  | 1  | 4  | 1  |
| 3 | 0  | 2  | 3  | 2  | 3  | 2  |
| 3 | 2  | 1  | 4  | 1  | 4  | 1  |
| 3 | 0  | 1  | 4  | 1  | 4  | 1  |
| 3 | 0  | 1  | 4  | 1  | 4  | 1  |
| 3 | 0  | 2  | 3  | 2  | 3  | 2  |
| 3 | 0  | 1  | 99 | 1  | 99 | 2  |
| 3 | 0  | 1  | 4  | 1  | 4  | 1  |

|    |    |    |    |    |    |    |
|----|----|----|----|----|----|----|
| 3  | 0  | 4  | 4  | 1  | 4  | 4  |
| 3  | 0  | 4  | 4  | 1  | 4  | 4  |
| 99 | 99 | 99 | 99 | 99 | 99 | 99 |
| 3  | 0  | 1  | 4  | 1  | 4  | 1  |
| 3  | 0  | 1  | 4  | 1  | 4  | 1  |
| 3  | 0  | 2  | 3  | 2  | 3  | 2  |
| 3  | 0  | 1  | 4  | 1  | 4  | 1  |
| 3  | 0  | 1  | 3  | 1  | 4  | 1  |
| 99 | 99 | 99 | 99 | 99 | 99 | 99 |
| 3  | 0  | 2  | 4  | 1  | 3  | 2  |
| 2  | 1  | 1  | 4  | 1  | 4  | 1  |
| 3  | 0  | 2  | 2  | 1  | 4  | 2  |
| 3  | 0  | 2  | 4  | 1  | 4  | 2  |
| 2  | 2  | 4  | 4  | 2  | 4  | 3  |
| 3  | 0  | 4  | 4  | 1  | 3  | 1  |
| 3  | 0  | 1  | 1  | 1  | 1  | 1  |
| 3  | 0  | 1  | 1  | 1  | 4  | 1  |
| 2  | 2  | 1  | 4  | 1  | 4  | 1  |
| 3  | 0  | 1  | 4  | 4  | 3  | 1  |
| 3  | 0  | 4  | 4  | 2  | 3  | 1  |
| 3  | 0  | 1  | 4  | 1  | 1  | 1  |
| 3  | 0  | 1  | 4  | 1  | 4  | 1  |
| 3  | 0  | 3  | 2  | 3  | 2  | 3  |
| 3  | 0  | 2  | 3  | 1  | 4  | 2  |
| 3  | 0  | 1  | 4  | 1  | 1  | 1  |
| 3  | 0  | 99 | 4  | 99 | 99 | 99 |
| 3  | 0  | 2  | 3  | 1  | 4  | 2  |
| 3  | 0  | 3  | 4  | 1  | 4  | 1  |
| 3  | 0  | 1  | 4  | 1  | 4  | 1  |
| 3  | 0  | 1  | 4  | 1  | 4  | 1  |
| 3  | 0  | 3  | 4  | 1  | 3  | 3  |
| 3  | 0  | 3  | 3  | 1  | 3  | 2  |
| 3  | 0  | 2  | 99 | 2  | 3  | 2  |
| 3  | 0  | 1  | 4  | 1  | 4  | 1  |
| 3  | 0  | 3  | 3  | 3  | 3  | 3  |
| 3  | 0  | 99 | 4  | 1  | 4  | 1  |
| 3  | 0  | 2  | 2  | 2  | 99 | 99 |
| 99 | 99 | 2  | 1  | 2  | 1  | 2  |
| 3  | 0  | 1  | 4  | 1  | 4  | 1  |
| 3  | 0  | 99 | 3  | 2  | 3  | 2  |
| 2  | 99 | 1  | 4  | 1  | 4  | 1  |
| 2  | 2  | 3  | 3  | 2  | 3  | 3  |
| 3  | 0  | 1  | 1  | 1  | 1  | 1  |
| 3  | 0  | 1  | 1  | 2  | 4  | 2  |
| 3  | 0  | 99 | 99 | 99 | 99 | 99 |
| 3  | 0  | 3  | 4  | 2  | 3  | 3  |
| 3  | 0  | 1  | 4  | 1  | 4  | 1  |
| 3  | 0  | 1  | 4  | 2  | 3  | 1  |

|   |   |    |    |    |    |    |
|---|---|----|----|----|----|----|
| 3 | 0 | 2  | 3  | 1  | 3  | 1  |
| 3 | 0 | 99 | 4  | 1  | 4  | 1  |
| 3 | 0 | 1  | 4  | 1  | 4  | 2  |
| 3 | 0 | 4  | 4  | 1  | 4  | 1  |
| 3 | 2 | 99 | 3  | 2  | 3  | 2  |
| 3 | 0 | 1  | 1  | 1  | 1  | 1  |
| 3 | 0 | 4  | 4  | 1  | 4  | 1  |
| 3 | 0 | 4  | 4  | 2  | 4  | 2  |
| 3 | 0 | 2  | 4  | 1  | 4  | 1  |
| 3 | 0 | 2  | 4  | 1  | 1  | 3  |
| 3 | 0 | 1  | 4  | 1  | 4  | 1  |
| 3 | 0 | 1  | 1  | 1  | 1  | 2  |
| 3 | 0 | 2  | 3  | 2  | 3  | 2  |
| 3 | 0 | 1  | 4  | 1  | 4  | 1  |
| 3 | 0 | 99 | 4  | 1  | 4  | 1  |
| 3 | 0 | 1  | 4  | 1  | 4  | 1  |
| 3 | 0 | 4  | 4  | 1  | 4  | 3  |
| 3 | 0 | 99 | 99 | 99 | 99 | 99 |
| 3 | 0 | 3  | 4  | 2  | 3  | 1  |
| 3 | 0 | 1  | 1  | 99 | 99 | 1  |
| 3 | 0 | 1  | 4  | 1  | 4  | 2  |
| 3 | 0 | 1  | 3  | 1  | 3  | 1  |
| 3 | 0 | 1  | 4  | 1  | 4  | 1  |
| 3 | 0 | 1  | 4  | 1  | 4  | 1  |
| 3 | 0 | 2  | 3  | 2  | 3  | 2  |
| 3 | 0 | 2  | 3  | 1  | 4  | 1  |
| 3 | 0 | 1  | 4  | 1  | 4  | 99 |
| 3 | 0 | 1  | 1  | 1  | 1  | 1  |
| 3 | 0 | 3  | 3  | 3  | 3  | 2  |
| 3 | 0 | 1  | 3  | 2  | 3  | 2  |
| 3 | 0 | 3  | 4  | 1  | 1  | 3  |
| 3 | 0 | 1  | 4  | 1  | 4  | 1  |
| 3 | 0 | 1  | 99 | 1  | 4  | 1  |
| 3 | 0 | 1  | 1  | 1  | 3  | 1  |
| 3 | 0 | 1  | 4  | 2  | 4  | 2  |
| 3 | 0 | 1  | 1  | 1  | 4  | 2  |
| 3 | 0 | 1  | 4  | 1  | 4  | 1  |
| 3 | 2 | 1  | 4  | 1  | 4  | 1  |
| 2 | 2 | 2  | 2  | 2  | 2  | 2  |
| 3 | 0 | 3  | 4  | 1  | 4  | 1  |
| 3 | 0 | 1  | 3  | 2  | 4  | 2  |
| 3 | 0 | 2  | 99 | 3  | 99 | 2  |
| 3 | 0 | 2  | 1  | 2  | 1  | 1  |
| 3 | 0 | 1  | 4  | 1  | 4  | 1  |
| 3 | 0 | 4  | 4  | 2  | 4  | 3  |
| 0 | 0 | 4  | 3  | 2  | 3  | 2  |
| 0 | 0 | 3  | 3  | 2  | 3  | 2  |
| 3 | 0 | 4  | 4  | 1  | 4  | 1  |



|    |    |    |    |    |    |    |
|----|----|----|----|----|----|----|
| 3  | 0  | 3  | 4  | 1  | 4  | 3  |
| 3  | 0  | 4  | 4  | 1  | 1  | 1  |
| 3  | 0  | 2  | 4  | 99 | 3  | 1  |
| 3  | 0  | 3  | 4  | 1  | 4  | 1  |
| 3  | 0  | 1  | 4  | 1  | 4  | 1  |
| 3  | 0  | 1  | 2  | 2  | 2  | 2  |
| 3  | 0  | 3  | 4  | 1  | 3  | 2  |
| 3  | 1  | 1  | 4  | 1  | 4  | 1  |
| 3  | 0  | 1  | 4  | 1  | 4  | 1  |
| 3  | 0  | 4  | 4  | 2  | 3  | 4  |
| 3  | 0  | 1  | 1  | 1  | 1  | 2  |
| 0  | 0  | 1  | 1  | 1  | 4  | 1  |
| 99 | 99 | 99 | 99 | 99 | 99 | 99 |
| 3  | 0  | 3  | 3  | 1  | 3  | 1  |
| 3  | 0  | 1  | 4  | 1  | 4  | 1  |
| 3  | 0  | 1  | 4  | 1  | 4  | 1  |
| 3  | 0  | 1  | 3  | 2  | 3  | 2  |
| 3  | 0  | 2  | 3  | 1  | 3  | 2  |
| 3  | 0  | 1  | 4  | 1  | 4  | 1  |
| 3  | 0  | 2  | 4  | 1  | 4  | 1  |
| 3  | 0  | 2  | 3  | 2  | 3  | 2  |
| 3  | 0  | 1  | 4  | 1  | 4  | 2  |
| 3  | 0  | 1  | 2  | 1  | 1  | 1  |
| 3  | 0  | 1  | 4  | 1  | 4  | 1  |
| 3  | 0  | 1  | 4  | 1  | 4  | 1  |
| 99 | 0  | 2  | 3  | 2  | 3  | 2  |
| 1  | 0  | 4  | 2  | 2  | 4  | 2  |
| 3  | 0  | 2  | 1  | 1  | 2  | 3  |
| 2  | 2  | 1  | 1  | 1  | 1  | 1  |
| 3  | 0  | 2  | 2  | 2  | 2  | 2  |
| 1  | 0  | 1  | 4  | 2  | 1  | 3  |
| 3  | 0  | 1  | 4  | 2  | 4  | 2  |
| 0  | 0  | 3  | 4  | 1  | 4  | 3  |
| 3  | 0  | 3  | 4  | 1  | 4  | 1  |
| 3  | 0  | 1  | 4  | 1  | 4  | 1  |
| 3  | 0  | 2  | 3  | 2  | 2  | 2  |
| 3  | 0  | 3  | 2  | 2  | 2  | 3  |
| 3  | 1  | 3  | 3  | 3  | 99 | 2  |
| 3  | 0  | 1  | 4  | 1  | 4  | 1  |
| 3  | 0  | 2  | 3  | 1  | 1  | 3  |
| 3  | 0  | 1  | 3  | 2  | 4  | 2  |
| 2  | 2  | 1  | 4  | 1  | 4  | 1  |
| 3  | 0  | 3  | 4  | 1  | 3  | 2  |
| 3  | 0  | 3  | 4  | 99 | 4  | 99 |
| 3  | 0  | 4  | 4  | 1  | 4  | 1  |
| 3  | 0  | 4  | 4  | 1  | 4  | 1  |
| 3  | 0  | 1  | 4  | 1  | 4  | 1  |
| 3  | 0  | 1  | 4  | 1  | 4  | 1  |

|   |   |    |    |    |    |    |
|---|---|----|----|----|----|----|
| 3 | 0 | 3  | 3  | 2  | 2  | 1  |
| 3 | 0 | 2  | 4  | 1  | 4  | 1  |
| 0 | 2 | 3  | 3  | 2  | 3  | 3  |
| 3 | 0 | 1  | 4  | 1  | 4  | 1  |
| 3 | 0 | 4  | 4  | 1  | 4  | 2  |
| 2 | 2 | 2  | 1  | 2  | 1  | 1  |
| 3 | 0 | 1  | 4  | 1  | 4  | 2  |
| 3 | 0 | 1  | 4  | 1  | 1  | 4  |
| 3 | 0 | 1  | 4  | 1  | 4  | 4  |
| 3 | 0 | 2  | 4  | 1  | 1  | 1  |
| 3 | 0 | 1  | 4  | 2  | 1  | 2  |
| 3 | 0 | 1  | 4  | 1  | 4  | 1  |
| 0 | 0 | 2  | 4  | 1  | 99 | 1  |
| 3 | 0 | 4  | 4  | 1  | 4  | 1  |
| 3 | 0 | 1  | 4  | 1  | 4  | 1  |
| 3 | 0 | 3  | 3  | 3  | 3  | 4  |
| 3 | 0 | 3  | 3  | 2  | 3  | 3  |
| 2 | 0 | 1  | 4  | 1  | 4  | 4  |
| 1 | 2 | 3  | 4  | 1  | 1  | 3  |
| 2 | 0 | 99 | 99 | 1  | 4  | 4  |
| 3 | 0 | 1  | 4  | 1  | 4  | 1  |
| 1 | 1 | 1  | 4  | 1  | 4  | 1  |
| 3 | 2 | 2  | 3  | 99 | 99 | 2  |
| 3 | 0 | 2  | 3  | 2  | 3  | 3  |
| 3 | 0 | 1  | 4  | 1  | 4  | 1  |
| 3 | 0 | 1  | 4  | 1  | 4  | 2  |
| 3 | 0 | 99 | 3  | 2  | 4  | 1  |
| 3 | 0 | 1  | 4  | 1  | 1  | 2  |
| 3 | 0 | 2  | 3  | 2  | 3  | 2  |
| 3 | 0 | 1  | 4  | 1  | 4  | 1  |
| 3 | 0 | 1  | 4  | 1  | 4  | 1  |
| 2 | 2 | 1  | 4  | 1  | 3  | 2  |
| 3 | 0 | 1  | 4  | 1  | 4  | 1  |
| 3 | 0 | 1  | 4  | 1  | 4  | 2  |
| 3 | 0 | 2  | 2  | 2  | 3  | 2  |
| 3 | 0 | 1  | 4  | 1  | 4  | 1  |
| 3 | 0 | 1  | 3  | 1  | 3  | 1  |
| 3 | 0 | 1  | 4  | 1  | 4  | 2  |
| 0 | 1 | 2  | 3  | 2  | 3  | 99 |
| 3 | 0 | 1  | 4  | 4  | 4  | 1  |
| 3 | 0 | 1  | 4  | 1  | 4  | 99 |
| 3 | 0 | 1  | 3  | 1  | 3  | 2  |
| 3 | 0 | 1  | 4  | 1  | 4  | 1  |
| 3 | 0 | 2  | 4  | 1  | 1  | 2  |
| 3 | 0 | 4  | 3  | 2  | 2  | 3  |
| 3 | 0 | 3  | 4  | 1  | 4  | 3  |
| 1 | 0 | 4  | 2  | 2  | 3  | 4  |
| 3 | 0 | 1  | 4  | 1  | 1  | 1  |

|    |   |   |   |   |    |   |
|----|---|---|---|---|----|---|
| 3  | 0 | 1 | 4 | 1 | 4  | 1 |
| 3  | 0 | 1 | 4 | 1 | 4  | 1 |
| 3  | 2 | 3 | 4 | 2 | 4  | 2 |
| 3  | 0 | 1 | 4 | 1 | 4  | 1 |
| 3  | 0 | 2 | 3 | 2 | 3  | 2 |
| 3  | 0 | 2 | 4 | 4 | 4  | 3 |
| 3  | 0 | 1 | 3 | 1 | 3  | 2 |
| 3  | 0 | 2 | 4 | 1 | 3  | 1 |
| 3  | 0 | 1 | 4 | 1 | 4  | 1 |
| 99 | 0 | 1 | 4 | 1 | 4  | 2 |
| 3  | 0 | 2 | 3 | 1 | 3  | 1 |
| 3  | 0 | 3 | 3 | 1 | 4  | 1 |
| 3  | 0 | 2 | 3 | 3 | 2  | 2 |
| 3  | 0 | 1 | 4 | 1 | 4  | 1 |
| 3  | 0 | 1 | 4 | 1 | 1  | 1 |
| 3  | 0 | 1 | 4 | 1 | 3  | 1 |
| 3  | 0 | 2 | 4 | 1 | 3  | 2 |
| 3  | 0 | 2 | 4 | 2 | 99 | 2 |
| 0  | 0 | 4 | 4 | 3 | 3  | 2 |
| 3  | 0 | 1 | 4 | 1 | 4  | 1 |
| 3  | 0 | 2 | 4 | 1 | 4  | 3 |
| 3  | 0 | 2 | 4 | 1 | 4  | 1 |
| 3  | 0 | 3 | 3 | 2 | 3  | 3 |
| 0  | 0 | 1 | 1 | 1 | 1  | 1 |
| 3  | 0 | 3 | 4 | 4 | 3  | 4 |
| 3  | 0 | 1 | 4 | 1 | 4  | 1 |
| 3  | 0 | 4 | 4 | 1 | 4  | 1 |
| 3  | 0 | 1 | 4 | 1 | 4  | 1 |
| 0  | 1 | 3 | 2 | 3 | 2  | 4 |
| 3  | 0 | 1 | 4 | 1 | 4  | 2 |
| 3  | 0 | 1 | 4 | 1 | 4  | 1 |
| 3  | 0 | 1 | 4 | 1 | 4  | 1 |
| 3  | 0 | 2 | 3 | 2 | 3  | 2 |
| 3  | 0 | 3 | 3 | 2 | 3  | 3 |
| 3  | 0 | 1 | 4 | 1 | 4  | 1 |
| 3  | 0 | 1 | 4 | 1 | 4  | 1 |
| 0  | 0 | 2 | 2 | 2 | 2  | 2 |
| 3  | 0 | 1 | 4 | 1 | 4  | 1 |
| 3  | 0 | 1 | 4 | 1 | 4  | 1 |
| 3  | 0 | 1 | 4 | 1 | 4  | 1 |
| 1  | 1 | 4 | 3 | 2 | 3  | 3 |
| 3  | 0 | 4 | 4 | 1 | 4  | 1 |
| 1  | 0 | 4 | 4 | 4 | 4  | 4 |
| 1  | 0 | 2 | 3 | 2 | 2  | 2 |
| 3  | 0 | 1 | 4 | 1 | 4  | 4 |
| 1  | 1 | 2 | 2 | 3 | 2  | 2 |
| 3  | 0 | 1 | 4 | 1 | 1  | 1 |
| 3  | 0 | 1 | 4 | 1 | 4  | 3 |

|    |    |    |    |    |   |    |
|----|----|----|----|----|---|----|
| 3  | 0  | 1  | 4  | 1  | 4 | 1  |
| 3  | 0  | 2  | 3  | 1  | 1 | 1  |
| 3  | 0  | 3  | 3  | 3  | 3 | 2  |
| 3  | 0  | 1  | 4  | 1  | 4 | 1  |
| 0  | 1  | 4  | 1  | 4  | 1 | 4  |
| 3  | 0  | 1  | 4  | 2  | 3 | 1  |
| 3  | 2  | 2  | 4  | 1  | 4 | 1  |
| 3  | 0  | 1  | 4  | 1  | 4 | 1  |
| 3  | 0  | 4  | 4  | 1  | 4 | 1  |
| 3  | 0  | 4  | 4  | 4  | 4 | 4  |
| 3  | 0  | 1  | 4  | 2  | 3 | 2  |
| 3  | 0  | 1  | 4  | 2  | 4 | 2  |
| 3  | 0  | 1  | 4  | 1  | 1 | 4  |
| 3  | 0  | 1  | 3  | 1  | 1 | 2  |
| 2  | 99 | 2  | 2  | 2  | 2 | 2  |
| 3  | 2  | 3  | 3  | 4  | 3 | 4  |
| 3  | 0  | 99 | 4  | 1  | 4 | 1  |
| 3  | 0  | 3  | 3  | 2  | 3 | 2  |
| 3  | 0  | 3  | 3  | 1  | 4 | 2  |
| 3  | 0  | 1  | 4  | 1  | 4 | 1  |
| 3  | 0  | 2  | 4  | 1  | 4 | 2  |
| 3  | 0  | 2  | 2  | 2  | 3 | 3  |
| 3  | 0  | 2  | 3  | 2  | 3 | 2  |
| 3  | 0  | 99 | 4  | 1  | 1 | 1  |
| 3  | 0  | 1  | 4  | 1  | 4 | 2  |
| 3  | 0  | 1  | 4  | 1  | 4 | 1  |
| 0  | 2  | 1  | 4  | 1  | 4 | 1  |
| 3  | 0  | 1  | 4  | 1  | 4 | 1  |
| 3  | 0  | 1  | 3  | 1  | 4 | 1  |
| 0  | 0  | 4  | 4  | 1  | 1 | 1  |
| 2  | 2  | 2  | 3  | 2  | 4 | 3  |
| 0  | 2  | 1  | 1  | 1  | 1 | 1  |
| 0  | 0  | 1  | 4  | 1  | 4 | 1  |
| 3  | 0  | 1  | 4  | 1  | 4 | 1  |
| 3  | 0  | 1  | 4  | 1  | 4 | 99 |
| 3  | 0  | 1  | 4  | 1  | 4 | 1  |
| 3  | 2  | 3  | 4  | 1  | 4 | 2  |
| 3  | 2  | 3  | 2  | 4  | 4 | 1  |
| 3  | 0  | 4  | 4  | 1  | 4 | 1  |
| 1  | 0  | 4  | 4  | 1  | 4 | 1  |
| 3  | 0  | 1  | 2  | 4  | 4 | 1  |
| 3  | 0  | 1  | 4  | 1  | 4 | 1  |
| 3  | 0  | 1  | 4  | 1  | 4 | 1  |
| 3  | 0  | 2  | 4  | 1  | 4 | 1  |
| 99 | 0  | 2  | 4  | 2  | 3 | 3  |
| 3  | 0  | 99 | 99 | 99 | 4 | 1  |
| 3  | 0  | 1  | 4  | 1  | 4 | 1  |
| 3  | 0  | 4  | 4  | 1  | 4 | 1  |

|   |   |    |    |    |    |    |
|---|---|----|----|----|----|----|
| 3 | 0 | 1  | 1  | 1  | 4  | 1  |
| 2 | 2 | 4  | 4  | 2  | 1  | 2  |
| 3 | 0 | 1  | 1  | 1  | 1  | 1  |
| 3 | 0 | 99 | 3  | 2  | 3  | 2  |
| 1 | 0 | 1  | 3  | 1  | 3  | 1  |
| 2 | 2 | 1  | 4  | 1  | 4  | 1  |
| 3 | 0 | 1  | 4  | 1  | 4  | 1  |
| 3 | 0 | 99 | 4  | 1  | 3  | 1  |
| 3 | 2 | 1  | 1  | 3  | 2  | 3  |
| 3 | 0 | 4  | 4  | 1  | 4  | 1  |
| 3 | 0 | 1  | 4  | 1  | 4  | 2  |
| 3 | 0 | 1  | 4  | 2  | 4  | 1  |
| 3 | 0 | 1  | 4  | 1  | 4  | 1  |
| 3 | 0 | 2  | 3  | 2  | 3  | 1  |
| 3 | 0 | 4  | 4  | 1  | 4  | 1  |
| 3 | 0 | 2  | 3  | 2  | 3  | 1  |
| 3 | 0 | 4  | 4  | 1  | 4  | 4  |
| 3 | 0 | 4  | 3  | 4  | 3  | 4  |
| 3 | 0 | 2  | 3  | 1  | 3  | 2  |
| 3 | 0 | 2  | 3  | 2  | 3  | 2  |
| 3 | 0 | 1  | 4  | 1  | 4  | 2  |
| 3 | 0 | 2  | 3  | 2  | 3  | 2  |
| 3 | 0 | 2  | 3  | 2  | 99 | 99 |
| 3 | 0 | 1  | 4  | 1  | 4  | 1  |
| 3 | 1 | 3  | 3  | 2  | 3  | 2  |
| 3 | 0 | 2  | 4  | 1  | 4  | 2  |
| 3 | 0 | 2  | 3  | 2  | 3  | 2  |
| 3 | 0 | 1  | 99 | 99 | 2  | 2  |
| 3 | 0 | 1  | 4  | 1  | 4  | 1  |
| 3 | 0 | 1  | 4  | 1  | 4  | 1  |
| 3 | 0 | 1  | 4  | 1  | 4  | 1  |
| 3 | 0 | 1  | 4  | 1  | 4  | 99 |
| 3 | 0 | 2  | 4  | 1  | 3  | 99 |
| 3 | 0 | 1  | 3  | 2  | 4  | 1  |
| 3 | 0 | 1  | 4  | 1  | 4  | 2  |
| 3 | 0 | 2  | 2  | 2  | 2  | 2  |
| 3 | 0 | 2  | 3  | 2  | 3  | 2  |
| 3 | 0 | 1  | 4  | 1  | 4  | 1  |
| 3 | 0 | 2  | 3  | 2  | 4  | 1  |
| 3 | 0 | 2  | 3  | 2  | 3  | 2  |
| 3 | 0 | 1  | 4  | 1  | 4  | 1  |
| 3 | 0 | 2  | 4  | 1  | 4  | 2  |
| 3 | 0 | 1  | 4  | 99 | 99 | 3  |
| 0 | 0 | 1  | 4  | 1  | 3  | 99 |
| 3 | 0 | 1  | 4  | 1  | 4  | 1  |
| 3 | 0 | 2  | 2  | 2  | 2  | 2  |
| 3 | 0 | 1  | 4  | 1  | 1  | 1  |
| 3 | 0 | 1  | 4  | 1  | 4  | 1  |

|   |   |    |    |    |    |    |
|---|---|----|----|----|----|----|
| 3 | 0 | 4  | 4  | 1  | 1  | 1  |
| 3 | 0 | 2  | 3  | 2  | 3  | 2  |
| 3 | 0 | 1  | 4  | 1  | 4  | 3  |
| 3 | 0 | 1  | 4  | 1  | 4  | 1  |
| 3 | 0 | 99 | 99 | 99 | 99 | 99 |
| 3 | 0 | 99 | 4  | 1  | 4  | 2  |
| 3 | 0 | 1  | 4  | 1  | 4  | 3  |
| 0 | 0 | 2  | 2  | 2  | 2  | 2  |
| 3 | 0 | 3  | 3  | 2  | 3  | 2  |
| 3 | 0 | 2  | 4  | 2  | 4  | 4  |
| 3 | 0 | 1  | 4  | 1  | 4  | 1  |
| 3 | 0 | 2  | 3  | 2  | 3  | 2  |
| 3 | 0 | 1  | 4  | 1  | 4  | 1  |
| 3 | 0 | 1  | 3  | 3  | 3  | 2  |
| 3 | 0 | 1  | 4  | 1  | 4  | 1  |
| 3 | 0 | 2  | 4  | 1  | 4  | 1  |
| 3 | 0 | 2  | 1  | 1  | 1  | 1  |
| 3 | 0 | 2  | 3  | 2  | 3  | 2  |
| 0 | 0 | 4  | 1  | 4  | 4  | 4  |
| 3 | 0 | 1  | 1  | 1  | 1  | 1  |
| 2 | 2 | 4  | 4  | 1  | 4  | 4  |
| 2 | 2 | 3  | 3  | 3  | 4  | 4  |
| 3 | 0 | 99 | 4  | 1  | 4  | 1  |
| 3 | 0 | 1  | 4  | 1  | 4  | 1  |
| 3 | 0 | 1  | 4  | 1  | 4  | 1  |
| 3 | 0 | 4  | 4  | 1  | 4  | 1  |
| 3 | 0 | 2  | 3  | 2  | 3  | 2  |
| 3 | 0 | 99 | 3  | 2  | 3  | 3  |
| 3 | 0 | 1  | 4  | 1  | 4  | 1  |
| 3 | 0 | 2  | 4  | 1  | 4  | 1  |
| 0 | 0 | 2  | 3  | 2  | 4  | 3  |
| 3 | 0 | 2  | 3  | 1  | 3  | 1  |
| 3 | 0 | 1  | 4  | 1  | 4  | 1  |
| 3 | 0 | 1  | 4  | 1  | 4  | 1  |
| 3 | 0 | 2  | 4  | 1  | 4  | 3  |
| 3 | 0 | 1  | 4  | 2  | 3  | 2  |
| 3 | 0 | 1  | 4  | 1  | 4  | 1  |
| 3 | 0 | 1  | 1  | 1  | 4  | 1  |
| 3 | 0 | 1  | 4  | 1  | 4  | 1  |
| 3 | 0 | 1  | 4  | 1  | 4  | 1  |
| 3 | 0 | 1  | 4  | 1  | 4  | 1  |
| 3 | 0 | 1  | 4  | 1  | 4  | 1  |
| 3 | 0 | 1  | 4  | 1  | 4  | 1  |
| 3 | 0 | 2  | 3  | 2  | 3  | 2  |
| 0 | 0 | 3  | 3  | 2  | 3  | 2  |
| 2 | 0 | 4  | 4  | 1  | 4  | 2  |
| 0 | 1 | 2  | 3  | 2  | 3  | 2  |
| 2 | 2 | 2  | 3  | 2  | 2  | 2  |
| 3 | 0 | 1  | 2  | 3  | 3  | 2  |

|    |    |    |    |    |    |    |
|----|----|----|----|----|----|----|
| 3  | 0  | 1  | 4  | 1  | 4  | 1  |
| 3  | 0  | 4  | 4  | 1  | 1  | 1  |
| 3  | 0  | 2  | 3  | 2  | 2  | 2  |
| 0  | 0  | 1  | 1  | 2  | 3  | 1  |
| 3  | 0  | 4  | 4  | 1  | 4  | 1  |
| 3  | 0  | 1  | 4  | 1  | 4  | 1  |
| 3  | 0  | 2  | 3  | 2  | 2  | 2  |
| 3  | 0  | 2  | 4  | 1  | 3  | 2  |
| 3  | 0  | 1  | 4  | 1  | 4  | 1  |
| 3  | 0  | 1  | 4  | 1  | 4  | 2  |
| 3  | 0  | 99 | 99 | 99 | 99 | 1  |
| 3  | 0  | 1  | 4  | 1  | 4  | 1  |
| 3  | 0  | 1  | 4  | 1  | 4  | 1  |
| 3  | 0  | 2  | 3  | 2  | 2  | 2  |
| 3  | 0  | 99 | 99 | 99 | 4  | 99 |
| 3  | 0  | 1  | 4  | 1  | 4  | 1  |
| 3  | 0  | 1  | 4  | 1  | 4  | 1  |
| 3  | 2  | 1  | 4  | 1  | 4  | 1  |
| 3  | 0  | 1  | 4  | 1  | 3  | 2  |
| 3  | 0  | 99 | 4  | 1  | 3  | 99 |
| 3  | 0  | 1  | 3  | 2  | 4  | 3  |
| 0  | 0  | 3  | 3  | 2  | 3  | 2  |
| 3  | 0  | 3  | 3  | 2  | 3  | 2  |
| 3  | 0  | 2  | 3  | 1  | 4  | 1  |
| 2  | 2  | 1  | 4  | 1  | 4  | 1  |
| 3  | 0  | 2  | 4  | 1  | 4  | 1  |
| 3  | 0  | 99 | 99 | 1  | 1  | 2  |
| 3  | 0  | 1  | 4  | 1  | 4  | 1  |
| 3  | 0  | 1  | 4  | 1  | 4  | 1  |
| 3  | 0  | 99 | 4  | 1  | 4  | 1  |
| 3  | 0  | 1  | 4  | 1  | 4  | 1  |
| 3  | 0  | 1  | 4  | 1  | 4  | 2  |
| 3  | 0  | 2  | 4  | 1  | 4  | 1  |
| 3  | 0  | 1  | 4  | 1  | 4  | 1  |
| 3  | 0  | 1  | 3  | 2  | 3  | 2  |
| 3  | 0  | 1  | 4  | 1  | 4  | 1  |
| 3  | 0  | 1  | 4  | 1  | 4  | 1  |
| 3  | 0  | 1  | 4  | 1  | 4  | 1  |
| 3  | 0  | 1  | 4  | 1  | 4  | 99 |
| 3  | 1  | 2  | 3  | 2  | 3  | 3  |
| 3  | 0  | 1  | 3  | 2  | 4  | 1  |
| 3  | 0  | 1  | 99 | 1  | 4  | 1  |
| 3  | 0  | 1  | 4  | 1  | 4  | 1  |
| 99 | 99 | 99 | 4  | 1  | 4  | 99 |
| 1  | 2  | 2  | 3  | 1  | 3  | 3  |
| 3  | 0  | 1  | 4  | 1  | 4  | 1  |
| 3  | 0  | 2  | 4  | 1  | 4  | 2  |
| 3  | 0  | 1  | 4  | 1  | 4  | 1  |
| 3  | 0  | 1  | 4  | 1  | 4  | 1  |

|   |   |    |    |    |    |    |
|---|---|----|----|----|----|----|
| 3 | 0 | 2  | 3  | 1  | 3  | 2  |
| 3 | 0 | 2  | 2  | 2  | 2  | 2  |
| 3 | 0 | 3  | 99 | 2  | 4  | 2  |
| 3 | 1 | 1  | 4  | 1  | 4  | 1  |
| 3 | 0 | 1  | 99 | 4  | 3  | 1  |
| 2 | 0 | 2  | 3  | 2  | 1  | 2  |
| 1 | 1 | 2  | 3  | 2  | 3  | 2  |
| 3 | 0 | 1  | 4  | 1  | 4  | 1  |
| 3 | 0 | 1  | 1  | 1  | 1  | 1  |
| 3 | 0 | 1  | 4  | 1  | 4  | 1  |
| 0 | 0 | 4  | 4  | 4  | 4  | 4  |
| 3 | 0 | 1  | 4  | 1  | 4  | 1  |
| 3 | 0 | 1  | 4  | 1  | 4  | 2  |
| 3 | 0 | 1  | 3  | 2  | 3  | 2  |
| 3 | 1 | 2  | 3  | 3  | 2  | 3  |
| 0 | 2 | 2  | 3  | 3  | 2  | 3  |
| 3 | 0 | 3  | 4  | 1  | 4  | 1  |
| 3 | 0 | 2  | 3  | 1  | 2  | 2  |
| 3 | 0 | 1  | 4  | 1  | 4  | 1  |
| 0 | 1 | 99 | 99 | 99 | 99 | 99 |
| 3 | 0 | 1  | 4  | 1  | 4  | 1  |
| 1 | 1 | 1  | 4  | 1  | 4  | 1  |
| 3 | 0 | 2  | 2  | 2  | 3  | 2  |
| 3 | 0 | 1  | 1  | 1  | 4  | 1  |
| 3 | 0 | 1  | 3  | 2  | 3  | 2  |
| 3 | 0 | 3  | 3  | 2  | 3  | 2  |
| 3 | 0 | 3  | 3  | 3  | 3  | 3  |
| 3 | 0 | 1  | 4  | 1  | 4  | 1  |
| 3 | 0 | 1  | 4  | 1  | 4  | 1  |
| 3 | 0 | 1  | 4  | 1  | 4  | 2  |
| 3 | 0 | 1  | 4  | 1  | 4  | 1  |
| 3 | 0 | 1  | 4  | 1  | 4  | 1  |
| 1 | 1 | 4  | 4  | 1  | 4  | 1  |
| 0 | 1 | 1  | 3  | 2  | 3  | 2  |
| 3 | 0 | 1  | 4  | 1  | 1  | 1  |
| 3 | 0 | 1  | 4  | 1  | 4  | 1  |
| 3 | 0 | 2  | 3  | 2  | 3  | 2  |
| 3 | 1 | 2  | 4  | 2  | 3  | 2  |
| 3 | 0 | 1  | 4  | 1  | 4  | 1  |
| 3 | 0 | 4  | 4  | 2  | 2  | 2  |
| 3 | 0 | 1  | 4  | 1  | 4  | 1  |
| 3 | 0 | 4  | 4  | 1  | 4  | 1  |
| 3 | 0 | 1  | 4  | 1  | 4  | 1  |
| 3 | 0 | 1  | 4  | 1  | 4  | 1  |
| 3 | 0 | 2  | 4  | 1  | 4  | 1  |
| 3 | 0 | 1  | 4  | 2  | 3  | 3  |
| 3 | 0 | 2  | 4  | 2  | 4  | 2  |



|   |   |    |    |    |    |    |
|---|---|----|----|----|----|----|
| 3 | 0 | 1  | 4  | 1  | 4  | 1  |
| 0 | 1 | 2  | 4  | 2  | 3  | 2  |
| 3 | 0 | 2  | 3  | 2  | 3  | 2  |
| 3 | 0 | 2  | 3  | 2  | 2  | 2  |
| 3 | 0 | 1  | 4  | 1  | 4  | 1  |
| 0 | 1 | 2  | 3  | 2  | 2  | 2  |
| 3 | 0 | 1  | 3  | 2  | 3  | 2  |
| 0 | 0 | 3  | 3  | 3  | 3  | 3  |
| 1 | 1 | 3  | 3  | 2  | 2  | 2  |
| 0 | 0 | 1  | 1  | 1  | 1  | 1  |
| 3 | 0 | 1  | 3  | 2  | 3  | 2  |
| 3 | 0 | 1  | 4  | 1  | 1  | 2  |
| 3 | 0 | 1  | 4  | 1  | 4  | 1  |
| 3 | 0 | 1  | 4  | 2  | 3  | 2  |
| 3 | 0 | 2  | 4  | 1  | 4  | 1  |
| 3 | 0 | 2  | 4  | 1  | 4  | 1  |
| 3 | 0 | 2  | 3  | 1  | 2  | 3  |
| 3 | 0 | 1  | 4  | 1  | 4  | 1  |
| 3 | 0 | 1  | 4  | 1  | 4  | 1  |
| 3 | 0 | 2  | 3  | 2  | 3  | 1  |
| 3 | 0 | 1  | 4  | 1  | 4  | 1  |
| 3 | 0 | 1  | 4  | 1  | 4  | 1  |
| 3 | 0 | 2  | 3  | 1  | 3  | 2  |
| 3 | 0 | 2  | 2  | 2  | 2  | 2  |
| 3 | 0 | 4  | 99 | 2  | 3  | 2  |
| 3 | 0 | 2  | 3  | 2  | 3  | 3  |
| 3 | 0 | 1  | 4  | 1  | 4  | 1  |
| 3 | 0 | 2  | 3  | 2  | 2  | 2  |
| 3 | 0 | 1  | 4  | 1  | 4  | 1  |
| 3 | 0 | 99 | 99 | 99 | 99 | 99 |
| 3 | 0 | 4  | 4  | 1  | 4  | 1  |
| 3 | 0 | 1  | 3  | 1  | 4  | 2  |
| 3 | 0 | 1  | 4  | 1  | 4  | 1  |
| 3 | 0 | 1  | 4  | 1  | 4  | 1  |
| 3 | 0 | 1  | 4  | 1  | 4  | 1  |
| 3 | 0 | 1  | 4  | 1  | 4  | 1  |
| 3 | 0 | 2  | 2  | 2  | 1  | 1  |
| 3 | 0 | 1  | 4  | 1  | 4  | 1  |
| 3 | 0 | 1  | 1  | 1  | 4  | 1  |
| 3 | 0 | 1  | 1  | 1  | 1  | 1  |
| 3 | 0 | 4  | 3  | 1  | 99 | 2  |
| 3 | 0 | 1  | 4  | 1  | 4  | 1  |
| 0 | 1 | 4  | 1  | 4  | 1  | 4  |
| 3 | 0 | 1  | 4  | 1  | 4  | 1  |
| 3 | 2 | 2  | 1  | 2  | 1  | 2  |
| 3 | 0 | 1  | 4  | 1  | 1  | 2  |
| 3 | 0 | 1  | 4  | 1  | 4  | 1  |
| 3 | 0 | 1  | 4  | 1  | 4  | 1  |
| 3 | 0 | 2  | 2  | 3  | 2  | 4  |
| 3 | 0 | 1  | 4  | 2  | 4  | 1  |

|   |   |    |    |    |    |    |
|---|---|----|----|----|----|----|
| 3 | 0 | 1  | 4  | 1  | 4  | 1  |
| 0 | 1 | 1  | 4  | 1  | 4  | 1  |
| 3 | 0 | 99 | 3  | 2  | 3  | 2  |
| 3 | 0 | 1  | 4  | 1  | 4  | 2  |
| 3 | 0 | 1  | 4  | 1  | 4  | 1  |
| 3 | 0 | 99 | 99 | 99 | 99 | 99 |
| 2 | 2 | 2  | 2  | 2  | 3  | 2  |
| 3 | 2 | 1  | 4  | 1  | 4  | 1  |
| 2 | 2 | 1  | 4  | 2  | 4  | 1  |
| 3 | 0 | 2  | 4  | 1  | 4  | 2  |
| 3 | 0 | 4  | 4  | 1  | 4  | 1  |
| 3 | 0 | 1  | 4  | 1  | 4  | 1  |
| 3 | 0 | 2  | 2  | 2  | 3  | 3  |
| 0 | 0 | 2  | 3  | 2  | 3  | 2  |
| 3 | 0 | 1  | 4  | 1  | 4  | 1  |
| 3 | 0 | 1  | 4  | 1  | 4  | 1  |
| 3 | 0 | 4  | 4  | 4  | 4  | 4  |
| 3 | 0 | 2  | 3  | 1  | 4  | 2  |
| 3 | 0 | 2  | 3  | 2  | 3  | 2  |
| 3 | 0 | 1  | 4  | 1  | 4  | 1  |
| 3 | 0 | 1  | 4  | 1  | 4  | 2  |
| 3 | 0 | 1  | 4  | 1  | 4  | 1  |
| 3 | 0 | 1  | 1  | 1  | 1  | 1  |
| 3 | 0 | 1  | 4  | 1  | 4  | 1  |
| 3 | 0 | 1  | 3  | 2  | 3  | 99 |
| 3 | 0 | 2  | 2  | 2  | 2  | 2  |
| 3 | 0 | 2  | 3  | 2  | 3  | 2  |
| 3 | 0 | 1  | 4  | 1  | 4  | 1  |
| 3 | 0 | 99 | 4  | 1  | 4  | 99 |
| 3 | 0 | 2  | 4  | 1  | 4  | 2  |
| 3 | 0 | 1  | 4  | 1  | 4  | 1  |
| 1 | 1 | 1  | 1  | 1  | 1  | 1  |
| 3 | 0 | 1  | 4  | 1  | 4  | 1  |
| 3 | 0 | 1  | 4  | 1  | 4  | 1  |
| 3 | 2 | 1  | 4  | 1  | 4  | 1  |
| 0 | 1 | 1  | 4  | 1  | 4  | 1  |
| 3 | 0 | 1  | 4  | 1  | 4  | 1  |
| 3 | 0 | 1  | 4  | 1  | 4  | 1  |
| 2 | 2 | 1  | 3  | 1  | 1  | 1  |
| 3 | 0 | 1  | 99 | 99 | 99 | 99 |
| 3 | 0 | 1  | 4  | 1  | 4  | 1  |
| 1 | 0 | 1  | 4  | 1  | 4  | 1  |
| 3 | 0 | 2  | 4  | 1  | 4  | 2  |
| 3 | 0 | 3  | 3  | 3  | 2  | 2  |
| 3 | 0 | 4  | 4  | 4  | 4  | 4  |
| 2 | 2 | 1  | 4  | 1  | 4  | 99 |
| 3 | 0 | 1  | 4  | 1  | 4  | 1  |
| 3 | 0 | 1  | 4  | 1  | 4  | 1  |

|    |    |   |   |    |    |    |
|----|----|---|---|----|----|----|
| 3  | 0  | 2 | 4 | 2  | 3  | 2  |
| 2  | 2  | 2 | 3 | 2  | 3  | 2  |
| 3  | 0  | 2 | 3 | 1  | 3  | 1  |
| 1  | 1  | 4 | 4 | 4  | 4  | 4  |
| 3  | 0  | 1 | 4 | 1  | 4  | 1  |
| 3  | 0  | 3 | 3 | 3  | 3  | 2  |
| 3  | 1  | 4 | 1 | 4  | 1  | 4  |
| 3  | 0  | 1 | 4 | 1  | 4  | 1  |
| 3  | 0  | 1 | 4 | 1  | 4  | 1  |
| 3  | 0  | 2 | 4 | 2  | 4  | 1  |
| 3  | 0  | 3 | 4 | 1  | 4  | 1  |
| 3  | 0  | 1 | 4 | 1  | 4  | 1  |
| 3  | 0  | 1 | 4 | 1  | 4  | 1  |
| 3  | 0  | 1 | 4 | 1  | 4  | 1  |
| 3  | 0  | 1 | 4 | 1  | 4  | 1  |
| 3  | 0  | 1 | 4 | 99 | 99 | 1  |
| 3  | 0  | 1 | 4 | 1  | 4  | 1  |
| 0  | 1  | 3 | 2 | 3  | 2  | 3  |
| 3  | 0  | 2 | 3 | 2  | 3  | 2  |
| 3  | 0  | 1 | 4 | 1  | 4  | 1  |
| 3  | 0  | 1 | 4 | 1  | 4  | 1  |
| 3  | 0  | 2 | 4 | 2  | 4  | 2  |
| 3  | 0  | 2 | 4 | 1  | 99 | 4  |
| 3  | 0  | 1 | 4 | 1  | 4  | 1  |
| 3  | 0  | 1 | 4 | 1  | 4  | 1  |
| 3  | 0  | 1 | 4 | 1  | 4  | 1  |
| 3  | 0  | 3 | 4 | 2  | 3  | 2  |
| 3  | 0  | 1 | 4 | 1  | 4  | 1  |
| 3  | 0  | 1 | 4 | 1  | 4  | 1  |
| 3  | 0  | 1 | 1 | 1  | 1  | 1  |
| 3  | 0  | 1 | 4 | 2  | 3  | 2  |
| 3  | 0  | 3 | 3 | 4  | 3  | 1  |
| 3  | 0  | 1 | 4 | 1  | 4  | 1  |
| 3  | 0  | 2 | 3 | 2  | 3  | 2  |
| 3  | 0  | 2 | 3 | 2  | 3  | 2  |
| 2  | 2  | 2 | 1 | 2  | 1  | 1  |
| 3  | 0  | 1 | 4 | 1  | 4  | 1  |
| 3  | 0  | 1 | 4 | 1  | 4  | 1  |
| 3  | 0  | 1 | 3 | 1  | 3  | 1  |
| 3  | 0  | 1 | 4 | 1  | 4  | 1  |
| 2  | 2  | 1 | 1 | 1  | 2  | 1  |
| 3  | 0  | 1 | 1 | 1  | 4  | 1  |
| 3  | 0  | 3 | 3 | 4  | 99 | 99 |
| 3  | 0  | 1 | 4 | 1  | 4  | 1  |
| 3  | 0  | 4 | 4 | 1  | 4  | 1  |
| 3  | 0  | 2 | 4 | 2  | 3  | 1  |
| 3  | 0  | 1 | 4 | 1  | 4  | 1  |
| 99 | 99 | 4 | 4 | 1  | 4  | 1  |
| 3  | 0  | 1 | 4 | 1  | 4  | 1  |

|    |    |    |    |    |    |    |
|----|----|----|----|----|----|----|
| 3  | 0  | 3  | 3  | 2  | 3  | 2  |
| 3  | 0  | 4  | 4  | 4  | 4  | 4  |
| 3  | 0  | 4  | 4  | 4  | 4  | 4  |
| 3  | 0  | 1  | 4  | 1  | 4  | 1  |
| 3  | 0  | 2  | 3  | 2  | 2  | 2  |
| 3  | 0  | 1  | 4  | 1  | 4  | 1  |
| 3  | 0  | 1  | 4  | 1  | 4  | 1  |
| 3  | 0  | 1  | 4  | 1  | 1  | 1  |
| 0  | 0  | 2  | 2  | 2  | 2  | 2  |
| 3  | 0  | 3  | 4  | 1  | 4  | 1  |
| 0  | 0  | 4  | 4  | 4  | 4  | 1  |
| 3  | 0  | 1  | 4  | 1  | 4  | 1  |
| 3  | 0  | 2  | 3  | 2  | 3  | 2  |
| 2  | 2  | 1  | 1  | 1  | 1  | 2  |
| 3  | 0  | 1  | 4  | 1  | 4  | 1  |
| 3  | 0  | 3  | 3  | 3  | 3  | 3  |
| 3  | 0  | 1  | 4  | 1  | 4  | 1  |
| 3  | 0  | 2  | 4  | 4  | 4  | 2  |
| 2  | 2  | 2  | 3  | 2  | 2  | 2  |
| 3  | 0  | 1  | 4  | 1  | 4  | 1  |
| 3  | 0  | 99 | 4  | 1  | 4  | 1  |
| 3  | 0  | 1  | 4  | 1  | 4  | 2  |
| 3  | 0  | 4  | 4  | 1  | 4  | 1  |
| 0  | 2  | 2  | 2  | 1  | 2  | 3  |
| 3  | 0  | 2  | 2  | 2  | 2  | 2  |
| 3  | 0  | 1  | 4  | 1  | 4  | 1  |
| 3  | 0  | 1  | 4  | 1  | 4  | 1  |
| 3  | 0  | 1  | 4  | 1  | 4  | 1  |
| 3  | 0  | 99 | 4  | 1  | 4  | 1  |
| 3  | 0  | 1  | 4  | 1  | 4  | 1  |
| 3  | 0  | 1  | 4  | 1  | 1  | 1  |
| 1  | 1  | 3  | 4  | 1  | 4  | 3  |
| 3  | 0  | 1  | 4  | 1  | 4  | 1  |
| 3  | 0  | 1  | 4  | 1  | 4  | 1  |
| 3  | 0  | 1  | 4  | 1  | 4  | 1  |
| 3  | 0  | 2  | 3  | 2  | 3  | 2  |
| 99 | 99 | 1  | 4  | 1  | 1  | 2  |
| 3  | 0  | 1  | 4  | 1  | 4  | 1  |
| 3  | 2  | 2  | 4  | 3  | 2  | 3  |
| 3  | 0  | 1  | 4  | 1  | 4  | 1  |
| 3  | 0  | 99 | 99 | 99 | 99 | 99 |
| 3  | 0  | 2  | 4  | 1  | 4  | 1  |
| 3  | 0  | 1  | 4  | 1  | 4  | 1  |
| 3  | 0  | 1  | 4  | 4  | 4  | 4  |
| 3  | 0  | 1  | 3  | 1  | 4  | 1  |
| 3  | 0  | 2  | 3  | 2  | 3  | 2  |
| 0  | 0  | 2  | 3  | 2  | 3  | 2  |
| 3  | 0  | 1  | 4  | 1  | 4  | 1  |

|    |    |    |   |   |   |    |
|----|----|----|---|---|---|----|
| 3  | 0  | 1  | 4 | 1 | 4 | 1  |
| 0  | 0  | 1  | 4 | 2 | 3 | 2  |
| 3  | 0  | 99 | 3 | 2 | 4 | 2  |
| 3  | 0  | 1  | 4 | 1 | 4 | 1  |
| 3  | 0  | 2  | 4 | 1 | 4 | 3  |
| 3  | 0  | 3  | 3 | 2 | 3 | 2  |
| 3  | 0  | 1  | 4 | 1 | 4 | 99 |
| 1  | 0  | 1  | 3 | 4 | 1 | 1  |
| 1  | 1  | 1  | 1 | 1 | 4 | 1  |
| 3  | 0  | 1  | 4 | 1 | 4 | 1  |
| 3  | 0  | 1  | 4 | 1 | 1 | 1  |
| 3  | 0  | 1  | 4 | 1 | 4 | 1  |
| 3  | 0  | 2  | 3 | 2 | 3 | 2  |
| 3  | 0  | 2  | 1 | 1 | 1 | 1  |
| 3  | 0  | 1  | 3 | 1 | 3 | 1  |
| 3  | 0  | 2  | 3 | 2 | 3 | 2  |
| 3  | 0  | 4  | 4 | 2 | 4 | 2  |
| 3  | 0  | 1  | 3 | 1 | 3 | 2  |
| 3  | 0  | 1  | 3 | 2 | 3 | 2  |
| 99 | 0  | 3  | 4 | 1 | 3 | 2  |
| 3  | 0  | 1  | 4 | 1 | 4 | 1  |
| 3  | 0  | 1  | 4 | 4 | 4 | 1  |
| 3  | 0  | 1  | 4 | 1 | 4 | 1  |
| 3  | 0  | 4  | 4 | 1 | 4 | 1  |
| 0  | 0  | 1  | 1 | 1 | 1 | 1  |
| 3  | 0  | 1  | 4 | 1 | 4 | 1  |
| 3  | 0  | 1  | 4 | 1 | 4 | 1  |
| 3  | 0  | 1  | 4 | 1 | 4 | 1  |
| 3  | 0  | 1  | 4 | 1 | 4 | 1  |
| 3  | 0  | 3  | 4 | 1 | 4 | 1  |
| 99 | 0  | 2  | 3 | 1 | 3 | 2  |
| 3  | 0  | 3  | 3 | 2 | 3 | 3  |
| 3  | 0  | 1  | 4 | 2 | 4 | 1  |
| 3  | 0  | 1  | 4 | 1 | 4 | 1  |
| 3  | 0  | 1  | 4 | 1 | 4 | 1  |
| 3  | 0  | 4  | 4 | 1 | 1 | 1  |
| 3  | 0  | 1  | 4 | 1 | 4 | 1  |
| 3  | 0  | 2  | 3 | 2 | 3 | 2  |
| 3  | 0  | 1  | 4 | 1 | 4 | 1  |
| 3  | 0  | 1  | 4 | 1 | 4 | 1  |
| 3  | 0  | 1  | 4 | 1 | 4 | 1  |
| 3  | 0  | 1  | 4 | 1 | 4 | 1  |
| 0  | 0  | 1  | 3 | 1 | 3 | 2  |
| 3  | 0  | 3  | 3 | 2 | 2 | 2  |
| 99 | 99 | 1  | 4 | 1 | 4 | 1  |
| 1  | 1  | 1  | 4 | 1 | 4 | 1  |
| 0  | 1  | 4  | 4 | 2 | 4 | 2  |
| 3  | 0  | 2  | 2 | 1 | 1 | 1  |

|    |    |    |   |   |   |    |
|----|----|----|---|---|---|----|
| 0  | 99 | 2  | 2 | 2 | 2 | 2  |
| 3  | 0  | 99 | 3 | 2 | 4 | 1  |
| 3  | 0  | 99 | 4 | 1 | 4 | 1  |
| 3  | 0  | 1  | 4 | 1 | 4 | 1  |
| 2  | 99 | 99 | 4 | 1 | 4 | 99 |
| 3  | 0  | 99 | 4 | 1 | 4 | 1  |
| 3  | 0  | 99 | 4 | 1 | 4 | 2  |
| 3  | 0  | 1  | 1 | 1 | 1 | 1  |
| 3  | 0  | 1  | 4 | 1 | 4 | 1  |
| 2  | 0  | 3  | 1 | 2 | 2 | 3  |
| 3  | 0  | 1  | 4 | 1 | 4 | 1  |
| 3  | 0  | 1  | 1 | 1 | 4 | 1  |
| 3  | 0  | 1  | 4 | 1 | 4 | 1  |
| 3  | 0  | 1  | 4 | 1 | 1 | 1  |
| 3  | 0  | 1  | 1 | 1 | 4 | 1  |
| 0  | 0  | 99 | 1 | 1 | 1 | 1  |
| 3  | 0  | 1  | 4 | 1 | 4 | 1  |
| 3  | 0  | 1  | 1 | 1 | 1 | 1  |
| 3  | 0  | 1  | 4 | 1 | 3 | 99 |
| 3  | 0  | 1  | 4 | 1 | 1 | 1  |
| 99 | 99 | 1  | 3 | 2 | 3 | 1  |
| 3  | 0  | 99 | 3 | 2 | 3 | 1  |
| 3  | 0  | 1  | 4 | 1 | 4 | 1  |
| 3  | 0  | 2  | 3 | 1 | 3 | 1  |
| 3  | 0  | 2  | 4 | 1 | 1 | 1  |
| 3  | 0  | 2  | 4 | 2 | 4 | 2  |
| 3  | 0  | 4  | 4 | 4 | 4 | 4  |
| 0  | 0  | 2  | 2 | 3 | 3 | 3  |
| 3  | 0  | 1  | 4 | 1 | 4 | 1  |
| 3  | 0  | 1  | 4 | 1 | 4 | 1  |
| 3  | 0  | 3  | 4 | 1 | 4 | 2  |
| 3  | 0  | 1  | 1 | 1 | 1 | 1  |
| 3  | 0  | 2  | 4 | 2 | 3 | 3  |
| 3  | 0  | 2  | 2 | 2 | 2 | 2  |
| 3  | 0  | 1  | 4 | 1 | 4 | 1  |
| 3  | 0  | 1  | 4 | 1 | 4 | 1  |
| 3  | 0  | 1  | 4 | 1 | 4 | 1  |
| 3  | 0  | 1  | 4 | 1 | 3 | 1  |
| 3  | 0  | 1  | 4 | 1 | 4 | 1  |
| 3  | 0  | 1  | 4 | 1 | 4 | 1  |
| 3  | 0  | 1  | 4 | 1 | 4 | 1  |
| 3  | 0  | 1  | 3 | 1 | 3 | 1  |
| 2  | 2  | 1  | 4 | 1 | 4 | 2  |
| 3  | 0  | 1  | 4 | 1 | 4 | 2  |
| 3  | 0  | 4  | 4 | 4 | 4 | 4  |
| 3  | 0  | 1  | 4 | 1 | 4 | 1  |
| 3  | 0  | 1  | 4 | 1 | 4 | 1  |
| 0  | 1  | 2  | 3 | 4 | 3 | 4  |

|   |   |    |    |    |    |    |
|---|---|----|----|----|----|----|
| 3 | 0 | 2  | 2  | 2  | 2  | 2  |
| 3 | 0 | 1  | 4  | 1  | 4  | 1  |
| 3 | 0 | 1  | 4  | 1  | 4  | 1  |
| 3 | 0 | 3  | 3  | 3  | 3  | 3  |
| 0 | 0 | 4  | 4  | 1  | 4  | 1  |
| 3 | 0 | 4  | 4  | 1  | 4  | 1  |
| 3 | 0 | 2  | 3  | 2  | 3  | 2  |
| 3 | 0 | 2  | 4  | 2  | 3  | 2  |
| 3 | 0 | 2  | 4  | 2  | 3  | 3  |
| 3 | 0 | 1  | 4  | 1  | 4  | 1  |
| 3 | 0 | 1  | 2  | 1  | 2  | 1  |
| 3 | 0 | 1  | 4  | 1  | 4  | 1  |
| 3 | 0 | 99 | 4  | 1  | 4  | 2  |
| 3 | 0 | 2  | 3  | 2  | 4  | 1  |
| 3 | 0 | 1  | 4  | 1  | 4  | 2  |
| 0 | 1 | 3  | 4  | 1  | 1  | 2  |
| 3 | 0 | 1  | 4  | 1  | 4  | 1  |
| 3 | 0 | 1  | 4  | 1  | 4  | 1  |
| 1 | 0 | 2  | 3  | 1  | 3  | 2  |
| 3 | 0 | 2  | 4  | 2  | 2  | 2  |
| 3 | 2 | 1  | 4  | 2  | 3  | 3  |
| 3 | 0 | 1  | 4  | 1  | 4  | 2  |
| 3 | 0 | 4  | 4  | 1  | 4  | 1  |
| 0 | 0 | 1  | 4  | 1  | 1  | 1  |
| 3 | 0 | 1  | 4  | 1  | 4  | 2  |
| 3 | 0 | 99 | 99 | 99 | 99 | 99 |
| 3 | 0 | 3  | 4  | 1  | 4  | 1  |
| 3 | 0 | 1  | 4  | 1  | 4  | 99 |
| 3 | 0 | 2  | 3  | 2  | 3  | 2  |
| 3 | 0 | 1  | 4  | 1  | 4  | 2  |
| 3 | 1 | 1  | 4  | 1  | 4  | 1  |
| 3 | 0 | 1  | 4  | 1  | 4  | 1  |
| 3 | 0 | 1  | 4  | 1  | 4  | 1  |
| 3 | 0 | 1  | 4  | 1  | 4  | 1  |
| 3 | 0 | 2  | 4  | 2  | 4  | 1  |
| 3 | 0 | 1  | 4  | 1  | 4  | 1  |
| 1 | 1 | 3  | 3  | 2  | 2  | 2  |
| 3 | 0 | 2  | 3  | 2  | 3  | 2  |
| 3 | 0 | 2  | 3  | 2  | 3  | 1  |
| 3 | 0 | 1  | 4  | 1  | 4  | 2  |
| 2 | 2 | 1  | 4  | 1  | 4  | 1  |
| 3 | 0 | 1  | 4  | 1  | 4  | 1  |
| 3 | 0 | 1  | 4  | 1  | 4  | 1  |
| 3 | 0 | 1  | 3  | 2  | 4  | 4  |
| 3 | 0 | 1  | 4  | 1  | 4  | 1  |
| 3 | 0 | 1  | 4  | 1  | 4  | 1  |
| 3 | 0 | 1  | 4  | 1  | 4  | 1  |
| 3 | 0 | 1  | 4  | 1  | 4  | 1  |

|    |    |    |   |   |   |    |
|----|----|----|---|---|---|----|
| 3  | 0  | 2  | 4 | 1 | 4 | 1  |
| 3  | 0  | 3  | 3 | 2 | 3 | 3  |
| 3  | 0  | 1  | 4 | 1 | 4 | 1  |
| 3  | 0  | 2  | 4 | 1 | 2 | 2  |
| 3  | 0  | 1  | 4 | 1 | 4 | 1  |
| 3  | 0  | 1  | 4 | 1 | 1 | 1  |
| 3  | 0  | 1  | 4 | 1 | 4 | 1  |
| 3  | 0  | 99 | 4 | 1 | 4 | 1  |
| 3  | 0  | 2  | 3 | 2 | 3 | 2  |
| 3  | 0  | 1  | 4 | 1 | 4 | 1  |
| 3  | 0  | 2  | 2 | 2 | 3 | 2  |
| 3  | 0  | 2  | 3 | 1 | 3 | 2  |
| 99 | 0  | 2  | 3 | 2 | 3 | 2  |
| 3  | 0  | 1  | 4 | 1 | 4 | 1  |
| 3  | 0  | 1  | 3 | 2 | 3 | 2  |
| 3  | 0  | 1  | 4 | 1 | 4 | 1  |
| 0  | 0  | 2  | 2 | 2 | 2 | 2  |
| 3  | 0  | 2  | 4 | 1 | 4 | 1  |
| 3  | 0  | 1  | 4 | 1 | 1 | 1  |
| 3  | 0  | 1  | 4 | 1 | 4 | 1  |
| 3  | 2  | 2  | 2 | 1 | 3 | 99 |
| 3  | 0  | 1  | 4 | 1 | 4 | 1  |
| 3  | 0  | 2  | 3 | 2 | 3 | 2  |
| 2  | 2  | 1  | 4 | 1 | 4 | 1  |
| 3  | 0  | 1  | 3 | 1 | 3 | 1  |
| 3  | 0  | 2  | 3 | 1 | 3 | 3  |
| 3  | 0  | 2  | 4 | 1 | 4 | 1  |
| 1  | 1  | 2  | 2 | 2 | 2 | 3  |
| 3  | 0  | 2  | 2 | 2 | 4 | 2  |
| 3  | 0  | 2  | 3 | 2 | 3 | 2  |
| 3  | 0  | 1  | 4 | 2 | 3 | 2  |
| 3  | 99 | 1  | 4 | 1 | 4 | 1  |
| 3  | 0  | 1  | 3 | 2 | 3 | 1  |
| 3  | 0  | 1  | 3 | 1 | 1 | 1  |
| 3  | 0  | 1  | 4 | 4 | 1 | 1  |
| 2  | 2  | 1  | 4 | 1 | 3 | 3  |
| 3  | 0  | 1  | 4 | 1 | 4 | 1  |
| 3  | 0  | 1  | 4 | 1 | 4 | 1  |
| 3  | 0  | 4  | 4 | 1 | 1 | 1  |
| 3  | 0  | 2  | 2 | 2 | 1 | 2  |
| 2  | 2  | 1  | 1 | 1 | 1 | 1  |
| 2  | 2  | 4  | 3 | 1 | 1 | 2  |
| 3  | 0  | 3  | 4 | 1 | 4 | 1  |
| 3  | 0  | 1  | 4 | 1 | 4 | 1  |
| 3  | 0  | 2  | 3 | 2 | 3 | 2  |
| 3  | 0  | 1  | 3 | 1 | 1 | 1  |
| 3  | 0  | 4  | 4 | 2 | 4 | 2  |
| 3  | 0  | 1  | 4 | 1 | 4 | 1  |



|    |    |    |    |    |    |    |
|----|----|----|----|----|----|----|
| 3  | 0  | 3  | 1  | 4  | 1  | 1  |
| 3  | 99 | 3  | 3  | 2  | 2  | 2  |
| 3  | 0  | 2  | 3  | 2  | 3  | 3  |
| 3  | 0  | 99 | 99 | 99 | 99 | 99 |
| 2  | 2  | 1  | 1  | 1  | 1  | 1  |
| 2  | 2  | 1  | 4  | 1  | 4  | 1  |
| 3  | 0  | 1  | 3  | 2  | 3  | 2  |
| 3  | 0  | 1  | 4  | 1  | 4  | 1  |
| 2  | 0  | 2  | 3  | 2  | 3  | 3  |
| 3  | 0  | 2  | 4  | 2  | 4  | 4  |
| 3  | 0  | 99 | 99 | 99 | 99 | 99 |
| 3  | 0  | 1  | 4  | 1  | 4  | 1  |
| 3  | 0  | 1  | 4  | 4  | 1  | 1  |
| 3  | 0  | 1  | 4  | 1  | 4  | 1  |
| 2  | 2  | 1  | 4  | 1  | 4  | 1  |
| 3  | 0  | 1  | 4  | 1  | 4  | 1  |
| 3  | 0  | 1  | 4  | 1  | 3  | 2  |
| 3  | 0  | 2  | 3  | 2  | 3  | 3  |
| 3  | 2  | 1  | 3  | 2  | 4  | 1  |
| 3  | 0  | 1  | 3  | 1  | 4  | 2  |
| 3  | 0  | 1  | 2  | 3  | 2  | 1  |
| 3  | 0  | 1  | 3  | 1  | 4  | 2  |
| 2  | 2  | 1  | 4  | 1  | 4  | 1  |
| 3  | 0  | 3  | 3  | 2  | 3  | 2  |
| 3  | 0  | 2  | 4  | 2  | 3  | 2  |
| 3  | 0  | 99 | 4  | 1  | 4  | 1  |
| 3  | 2  | 1  | 4  | 1  | 4  | 1  |
| 3  | 0  | 1  | 4  | 1  | 4  | 1  |
| 3  | 0  | 1  | 4  | 1  | 4  | 1  |
| 3  | 0  | 1  | 4  | 1  | 4  | 1  |
| 3  | 0  | 2  | 3  | 2  | 3  | 2  |
| 2  | 2  | 1  | 4  | 1  | 4  | 1  |
| 3  | 0  | 1  | 4  | 1  | 4  | 1  |
| 3  | 0  | 2  | 4  | 1  | 4  | 2  |
| 0  | 1  | 4  | 1  | 4  | 1  | 4  |
| 0  | 0  | 1  | 4  | 2  | 4  | 3  |
| 3  | 0  | 1  | 4  | 1  | 4  | 1  |
| 3  | 0  | 3  | 3  | 2  | 3  | 3  |
| 3  | 0  | 1  | 4  | 1  | 4  | 1  |
| 2  | 2  | 3  | 1  | 4  | 2  | 3  |
| 3  | 0  | 1  | 4  | 1  | 4  | 2  |
| 99 | 99 | 1  | 3  | 1  | 4  | 3  |
| 3  | 0  | 1  | 4  | 4  | 4  | 1  |
| 0  | 1  | 1  | 1  | 4  | 1  | 4  |
| 1  | 1  | 1  | 4  | 2  | 2  | 1  |
| 0  | 1  | 1  | 4  | 1  | 4  | 2  |
| 3  | 0  | 1  | 4  | 1  | 4  | 1  |
| 3  | 0  | 99 | 4  | 1  | 1  | 1  |

|    |    |    |    |    |    |    |
|----|----|----|----|----|----|----|
| 3  | 0  | 3  | 4  | 1  | 3  | 1  |
| 3  | 0  | 1  | 3  | 1  | 4  | 1  |
| 3  | 0  | 1  | 4  | 1  | 4  | 1  |
| 3  | 0  | 2  | 4  | 2  | 4  | 1  |
| 3  | 0  | 1  | 4  | 1  | 4  | 1  |
| 2  | 2  | 1  | 1  | 1  | 1  | 1  |
| 3  | 0  | 1  | 4  | 1  | 4  | 1  |
| 3  | 0  | 1  | 4  | 1  | 4  | 1  |
| 3  | 0  | 2  | 3  | 1  | 4  | 1  |
| 3  | 0  | 1  | 4  | 1  | 4  | 1  |
| 3  | 0  | 1  | 99 | 99 | 99 | 99 |
| 1  | 2  | 2  | 3  | 2  | 3  | 1  |
| 3  | 0  | 1  | 4  | 1  | 4  | 1  |
| 3  | 0  | 1  | 4  | 1  | 4  | 1  |
| 3  | 0  | 3  | 3  | 1  | 4  | 1  |
| 3  | 0  | 1  | 4  | 1  | 4  | 1  |
| 0  | 0  | 99 | 99 | 99 | 99 | 99 |
| 3  | 0  | 1  | 1  | 1  | 1  | 1  |
| 3  | 0  | 2  | 3  | 2  | 3  | 2  |
| 3  | 0  | 2  | 4  | 1  | 4  | 1  |
| 3  | 0  | 4  | 4  | 1  | 4  | 1  |
| 3  | 0  | 1  | 4  | 1  | 4  | 1  |
| 3  | 0  | 1  | 4  | 1  | 4  | 1  |
| 3  | 0  | 1  | 4  | 1  | 4  | 1  |
| 3  | 0  | 1  | 4  | 1  | 3  | 2  |
| 3  | 0  | 2  | 4  | 2  | 4  | 2  |
| 99 | 99 | 3  | 3  | 99 | 3  | 99 |
| 3  | 0  | 2  | 4  | 1  | 4  | 1  |
| 3  | 0  | 2  | 3  | 2  | 3  | 2  |
| 3  | 0  | 1  | 1  | 1  | 1  | 1  |
| 3  | 0  | 2  | 4  | 1  | 4  | 1  |
| 3  | 0  | 2  | 3  | 1  | 4  | 99 |
| 3  | 0  | 3  | 1  | 4  | 2  | 2  |
| 2  | 2  | 2  | 3  | 2  | 3  | 3  |
| 3  | 0  | 99 | 4  | 1  | 4  | 1  |
| 3  | 0  | 1  | 4  | 2  | 4  | 1  |
| 3  | 0  | 1  | 4  | 1  | 4  | 1  |
| 3  | 0  | 1  | 4  | 1  | 4  | 1  |
| 3  | 0  | 1  | 4  | 1  | 4  | 1  |
| 3  | 0  | 1  | 4  | 1  | 4  | 1  |
| 3  | 0  | 3  | 4  | 4  | 4  | 4  |
| 3  | 0  | 2  | 3  | 2  | 3  | 99 |
| 2  | 2  | 1  | 4  | 1  | 99 | 1  |
| 3  | 0  | 2  | 2  | 2  | 2  | 2  |
| 3  | 0  | 2  | 2  | 2  | 2  | 2  |
| 3  | 0  | 99 | 99 | 99 | 4  | 1  |
| 3  | 0  | 1  | 4  | 1  | 4  | 1  |
| 3  | 99 | 4  | 4  | 1  | 4  | 1  |

|    |    |    |    |    |    |    |
|----|----|----|----|----|----|----|
| 3  | 0  | 1  | 4  | 1  | 4  | 1  |
| 3  | 0  | 2  | 4  | 99 | 99 | 1  |
| 3  | 0  | 2  | 3  | 2  | 2  | 2  |
| 3  | 0  | 1  | 4  | 1  | 4  | 1  |
| 3  | 0  | 1  | 4  | 1  | 4  | 1  |
| 3  | 0  | 2  | 3  | 2  | 3  | 2  |
| 3  | 0  | 1  | 4  | 1  | 3  | 2  |
| 3  | 0  | 1  | 1  | 1  | 1  | 1  |
| 3  | 0  | 4  | 4  | 4  | 4  | 2  |
| 2  | 2  | 2  | 4  | 1  | 4  | 1  |
| 3  | 0  | 2  | 3  | 2  | 3  | 2  |
| 3  | 0  | 2  | 3  | 2  | 3  | 2  |
| 3  | 0  | 1  | 4  | 1  | 4  | 2  |
| 3  | 0  | 99 | 4  | 1  | 4  | 99 |
| 3  | 0  | 1  | 4  | 1  | 4  | 2  |
| 3  | 0  | 1  | 1  | 1  | 1  | 1  |
| 3  | 0  | 1  | 4  | 1  | 4  | 1  |
| 3  | 0  | 1  | 1  | 1  | 4  | 1  |
| 3  | 0  | 2  | 2  | 2  | 2  | 2  |
| 3  | 0  | 1  | 4  | 1  | 4  | 1  |
| 3  | 0  | 2  | 3  | 1  | 3  | 1  |
| 3  | 0  | 1  | 4  | 1  | 4  | 1  |
| 3  | 0  | 1  | 3  | 1  | 4  | 1  |
| 99 | 0  | 1  | 3  | 2  | 3  | 3  |
| 0  | 0  | 2  | 3  | 2  | 3  | 99 |
| 3  | 0  | 1  | 4  | 1  | 4  | 1  |
| 3  | 0  | 1  | 4  | 1  | 4  | 2  |
| 3  | 0  | 2  | 4  | 1  | 4  | 2  |
| 3  | 0  | 4  | 4  | 1  | 4  | 2  |
| 3  | 0  | 1  | 1  | 1  | 4  | 2  |
| 3  | 0  | 99 | 3  | 2  | 3  | 2  |
| 99 | 99 | 99 | 99 | 99 | 99 | 99 |
| 3  | 0  | 1  | 4  | 1  | 4  | 1  |
| 3  | 0  | 1  | 4  | 1  | 4  | 1  |
| 3  | 0  | 1  | 4  | 1  | 4  | 2  |
| 3  | 0  | 2  | 3  | 2  | 3  | 1  |
| 3  | 0  | 3  | 3  | 2  | 3  | 2  |
| 3  | 0  | 1  | 4  | 1  | 4  | 1  |
| 3  | 0  | 2  | 4  | 2  | 3  | 2  |
| 3  | 0  | 1  | 4  | 1  | 4  | 2  |
| 3  | 0  | 2  | 3  | 2  | 3  | 2  |
| 3  | 0  | 1  | 4  | 1  | 4  | 1  |
| 3  | 0  | 2  | 3  | 2  | 3  | 2  |
| 3  | 0  | 1  | 4  | 1  | 4  | 1  |
| 3  | 0  | 2  | 3  | 2  | 3  | 2  |
| 3  | 0  | 1  | 4  | 1  | 4  | 1  |
| 3  | 0  | 99 | 3  | 2  | 3  | 2  |
| 3  | 2  | 1  | 4  | 1  | 4  | 1  |
| 3  | 0  | 2  | 3  | 2  | 3  | 2  |
| 3  | 0  | 2  | 4  | 1  | 4  | 2  |

|    |    |    |    |    |    |    |
|----|----|----|----|----|----|----|
| 3  | 0  | 4  | 4  | 1  | 4  | 99 |
| 3  | 0  | 1  | 4  | 1  | 4  | 1  |
| 3  | 0  | 1  | 4  | 1  | 4  | 1  |
| 3  | 1  | 1  | 4  | 1  | 4  | 1  |
| 3  | 0  | 1  | 4  | 1  | 4  | 1  |
| 2  | 2  | 1  | 99 | 1  | 99 | 99 |
| 3  | 0  | 1  | 4  | 1  | 4  | 1  |
| 3  | 0  | 1  | 4  | 1  | 4  | 1  |
| 3  | 0  | 1  | 4  | 1  | 4  | 1  |
| 2  | 0  | 2  | 3  | 1  | 3  | 2  |
| 2  | 2  | 2  | 3  | 2  | 3  | 2  |
| 3  | 0  | 2  | 3  | 1  | 1  | 2  |
| 3  | 0  | 1  | 4  | 1  | 4  | 1  |
| 99 | 99 | 99 | 99 | 99 | 99 | 99 |
| 3  | 0  | 2  | 3  | 2  | 3  | 2  |
| 0  | 0  | 3  | 2  | 4  | 1  | 1  |
| 3  | 0  | 2  | 3  | 2  | 3  | 1  |
| 1  | 1  | 2  | 4  | 1  | 4  | 1  |
| 1  | 1  | 2  | 4  | 1  | 4  | 1  |
| 3  | 0  | 2  | 3  | 2  | 2  | 1  |
| 3  | 0  | 1  | 4  | 1  | 4  | 2  |
| 3  | 0  | 3  | 4  | 1  | 4  | 1  |
| 3  | 0  | 1  | 1  | 1  | 1  | 2  |
| 3  | 0  | 99 | 3  | 2  | 3  | 2  |
| 3  | 0  | 1  | 1  | 1  | 1  | 1  |
| 3  | 0  | 2  | 3  | 2  | 3  | 2  |
| 3  | 0  | 3  | 3  | 4  | 3  | 2  |
| 2  | 0  | 1  | 4  | 1  | 4  | 1  |
| 3  | 0  | 1  | 4  | 1  | 4  | 1  |
| 3  | 0  | 1  | 4  | 1  | 4  | 1  |
| 3  | 0  | 1  | 3  | 1  | 1  | 1  |
| 3  | 0  | 1  | 4  | 1  | 4  | 1  |
| 3  | 0  | 2  | 4  | 1  | 4  | 2  |
| 3  | 0  | 1  | 4  | 1  | 4  | 2  |
| 3  | 0  | 1  | 4  | 1  | 2  | 2  |
| 3  | 0  | 3  | 4  | 1  | 4  | 1  |
| 3  | 0  | 1  | 4  | 1  | 4  | 1  |
| 3  | 0  | 1  | 4  | 1  | 4  | 1  |
| 3  | 0  | 2  | 4  | 2  | 3  | 1  |
| 3  | 0  | 2  | 4  | 2  | 4  | 2  |
| 3  | 0  | 1  | 4  | 1  | 4  | 2  |
| 3  | 0  | 1  | 3  | 1  | 2  | 2  |
| 3  | 0  | 1  | 4  | 1  | 4  | 2  |
| 3  | 0  | 2  | 3  | 2  | 4  | 1  |
| 3  | 0  | 2  | 3  | 2  | 3  | 2  |
| 3  | 0  | 1  | 1  | 1  | 1  | 1  |
| 3  | 0  | 2  | 3  | 2  | 1  | 1  |
| 3  | 0  | 1  | 1  | 1  | 1  | 1  |

|    |    |    |    |    |    |    |
|----|----|----|----|----|----|----|
| 0  | 2  | 2  | 2  | 2  | 2  | 99 |
| 3  | 0  | 1  | 2  | 2  | 1  | 1  |
| 3  | 0  | 1  | 3  | 1  | 1  | 2  |
| 2  | 2  | 1  | 4  | 1  | 4  | 2  |
| 2  | 0  | 2  | 3  | 2  | 3  | 2  |
| 3  | 2  | 2  | 3  | 1  | 3  | 2  |
| 3  | 0  | 2  | 4  | 1  | 4  | 2  |
| 1  | 0  | 4  | 3  | 1  | 4  | 1  |
| 3  | 0  | 4  | 2  | 1  | 4  | 1  |
| 3  | 0  | 2  | 3  | 2  | 3  | 1  |
| 3  | 0  | 3  | 3  | 3  | 3  | 2  |
| 3  | 0  | 1  | 99 | 99 | 4  | 1  |
| 3  | 0  | 99 | 99 | 1  | 4  | 1  |
| 3  | 0  | 4  | 4  | 1  | 4  | 1  |
| 3  | 0  | 4  | 4  | 1  | 4  | 1  |
| 3  | 0  | 3  | 3  | 1  | 3  | 3  |
| 3  | 0  | 2  | 3  | 2  | 3  | 3  |
| 3  | 0  | 4  | 4  | 1  | 3  | 1  |
| 3  | 0  | 2  | 4  | 1  | 4  | 99 |
| 99 | 99 | 99 | 99 | 99 | 99 | 99 |
| 3  | 0  | 3  | 3  | 2  | 3  | 2  |
| 3  | 0  | 1  | 4  | 1  | 3  | 1  |
| 3  | 0  | 2  | 3  | 2  | 3  | 1  |
| 3  | 0  | 1  | 4  | 1  | 4  | 1  |
| 3  | 0  | 2  | 3  | 2  | 3  | 2  |
| 3  | 0  | 1  | 4  | 1  | 4  | 1  |
| 3  | 0  | 2  | 3  | 1  | 4  | 2  |
| 3  | 0  | 2  | 4  | 1  | 3  | 1  |
| 3  | 0  | 1  | 4  | 1  | 4  | 1  |
| 3  | 0  | 1  | 4  | 1  | 4  | 1  |
| 3  | 0  | 3  | 2  | 2  | 3  | 2  |
| 3  | 0  | 1  | 4  | 1  | 3  | 2  |
| 3  | 0  | 1  | 4  | 1  | 4  | 1  |
| 2  | 2  | 2  | 3  | 2  | 3  | 3  |
| 3  | 0  | 1  | 4  | 1  | 3  | 1  |
| 3  | 0  | 2  | 4  | 1  | 4  | 1  |
| 3  | 0  | 2  | 3  | 1  | 4  | 1  |
| 3  | 0  | 2  | 4  | 2  | 4  | 1  |
| 2  | 0  | 1  | 4  | 1  | 4  | 1  |
| 3  | 0  | 2  | 3  | 1  | 1  | 1  |
| 3  | 99 | 3  | 3  | 2  | 3  | 99 |
| 3  | 0  | 3  | 3  | 2  | 2  | 2  |
| 3  | 0  | 3  | 3  | 2  | 3  | 2  |
| 3  | 0  | 4  | 4  | 1  | 4  | 1  |
| 3  | 0  | 3  | 3  | 1  | 3  | 1  |
| 99 | 99 | 2  | 3  | 2  | 3  | 2  |
| 3  | 0  | 1  | 4  | 1  | 4  | 1  |

|   |   |    |   |   |   |   |
|---|---|----|---|---|---|---|
| 3 | 0 | 1  | 4 | 1 | 4 | 1 |
| 3 | 0 | 2  | 3 | 2 | 2 | 2 |
| 3 | 0 | 1  | 1 | 1 | 2 | 2 |
| 3 | 0 | 2  | 3 | 2 | 3 | 3 |
| 3 | 0 | 1  | 4 | 1 | 4 | 1 |
| 2 | 2 | 2  | 1 | 3 | 1 | 3 |
| 3 | 0 | 99 | 4 | 2 | 4 | 1 |
| 3 | 0 | 2  | 3 | 1 | 3 | 2 |
| 3 | 0 | 1  | 4 | 1 | 4 | 1 |
| 3 | 0 | 1  | 4 | 1 | 4 | 2 |
| 0 | 0 | 1  | 3 | 1 | 4 | 1 |
| 3 | 0 | 1  | 4 | 1 | 1 | 1 |
| 3 | 0 | 2  | 3 | 2 | 4 | 1 |
| 3 | 0 | 1  | 4 | 2 | 4 | 2 |
| 3 | 0 | 1  | 4 | 1 | 4 | 1 |
| 3 | 0 | 1  | 3 | 2 | 3 | 2 |
| 3 | 0 | 1  | 4 | 1 | 4 | 2 |
| 3 | 0 | 2  | 3 | 2 | 3 | 1 |
| 3 | 0 | 1  | 4 | 1 | 4 | 1 |
| 3 | 0 | 1  | 4 | 1 | 4 | 1 |
| 3 | 0 | 99 | 4 | 1 | 4 | 1 |
| 3 | 0 | 1  | 4 | 1 | 4 | 1 |
| 2 | 2 | 4  | 4 | 1 | 4 | 3 |
| 3 | 0 | 2  | 3 | 2 | 3 | 2 |
| 3 | 0 | 3  | 4 | 1 | 4 | 2 |
| 3 | 0 | 2  | 3 | 2 | 3 | 2 |
| 3 | 0 | 99 | 4 | 1 | 4 | 1 |
| 3 | 0 | 3  | 3 | 2 | 3 | 2 |
| 3 | 0 | 1  | 4 | 1 | 4 | 1 |
| 3 | 0 | 2  | 3 | 2 | 3 | 1 |
| 3 | 0 | 2  | 4 | 2 | 4 | 1 |
| 3 | 0 | 1  | 4 | 1 | 4 | 1 |
| 3 | 0 | 1  | 4 | 1 | 4 | 1 |
| 3 | 0 | 2  | 3 | 1 | 4 | 1 |
| 3 | 0 | 1  | 4 | 1 | 4 | 1 |
| 0 | 1 | 3  | 4 | 1 | 4 | 2 |
| 3 | 0 | 1  | 4 | 1 | 4 | 1 |
| 3 | 0 | 4  | 4 | 1 | 4 | 1 |
| 0 | 0 | 1  | 4 | 1 | 4 | 1 |
| 0 | 0 | 4  | 1 | 4 | 1 | 4 |
| 3 | 0 | 1  | 4 | 1 | 4 | 1 |
| 0 | 1 | 1  | 1 | 4 | 1 | 4 |
| 3 | 0 | 1  | 4 | 1 | 4 | 1 |
| 3 | 0 | 1  | 4 | 1 | 4 | 1 |
| 3 | 0 | 1  | 4 | 1 | 4 | 1 |
| 3 | 0 | 2  | 4 | 1 | 3 | 1 |
| 3 | 0 | 1  | 4 | 1 | 4 | 1 |
| 3 | 0 | 2  | 1 | 1 | 3 | 2 |

|    |    |    |    |    |    |    |
|----|----|----|----|----|----|----|
| 3  | 0  | 1  | 4  | 1  | 4  | 1  |
| 3  | 0  | 1  | 4  | 1  | 4  | 1  |
| 3  | 0  | 1  | 4  | 1  | 4  | 99 |
| 3  | 0  | 1  | 4  | 1  | 4  | 1  |
| 3  | 0  | 1  | 4  | 1  | 1  | 1  |
| 3  | 0  | 1  | 4  | 1  | 4  | 1  |
| 3  | 2  | 99 | 4  | 1  | 1  | 1  |
| 3  | 0  | 1  | 4  | 1  | 4  | 2  |
| 3  | 0  | 2  | 2  | 1  | 2  | 1  |
| 3  | 0  | 2  | 3  | 3  | 3  | 3  |
| 3  | 0  | 2  | 3  | 2  | 3  | 3  |
| 3  | 0  | 1  | 3  | 2  | 3  | 99 |
| 3  | 0  | 1  | 4  | 1  | 4  | 1  |
| 3  | 0  | 1  | 99 | 1  | 1  | 2  |
| 0  | 99 | 1  | 4  | 1  | 1  | 1  |
| 99 | 99 | 99 | 99 | 99 | 99 | 2  |
| 3  | 0  | 4  | 4  | 1  | 4  | 1  |
| 3  | 0  | 1  | 99 | 1  | 1  | 1  |
| 3  | 0  | 1  | 4  | 1  | 4  | 1  |
| 3  | 0  | 1  | 4  | 1  | 4  | 1  |
| 3  | 0  | 1  | 4  | 1  | 4  | 1  |
| 3  | 0  | 1  | 4  | 1  | 4  | 1  |
| 3  | 0  | 1  | 4  | 1  | 4  | 2  |
| 3  | 0  | 1  | 4  | 1  | 4  | 1  |
| 3  | 0  | 1  | 4  | 1  | 4  | 1  |
| 3  | 0  | 2  | 4  | 2  | 4  | 2  |
| 3  | 0  | 2  | 3  | 2  | 3  | 2  |
| 3  | 2  | 1  | 3  | 2  | 3  | 2  |
| 3  | 0  | 1  | 4  | 1  | 4  | 1  |
| 3  | 0  | 1  | 4  | 1  | 4  | 1  |
| 3  | 0  | 2  | 3  | 2  | 3  | 2  |
| 3  | 0  | 2  | 4  | 1  | 3  | 3  |
| 3  | 0  | 1  | 4  | 1  | 1  | 2  |
| 3  | 0  | 3  | 4  | 1  | 3  | 1  |
| 3  | 0  | 2  | 3  | 2  | 3  | 2  |
| 3  | 0  | 3  | 3  | 2  | 3  | 2  |
| 99 | 99 | 99 | 99 | 99 | 99 | 99 |
| 3  | 0  | 2  | 3  | 2  | 3  | 2  |
| 3  | 0  | 3  | 3  | 1  | 3  | 1  |
| 3  | 0  | 4  | 4  | 1  | 4  | 1  |
| 3  | 0  | 1  | 4  | 1  | 4  | 1  |
| 3  | 0  | 4  | 4  | 1  | 4  | 2  |
| 3  | 0  | 2  | 4  | 1  | 3  | 1  |
| 3  | 0  | 1  | 4  | 1  | 4  | 1  |
| 3  | 0  | 3  | 4  | 1  | 4  | 1  |
| 3  | 0  | 2  | 3  | 1  | 4  | 1  |
| 3  | 0  | 1  | 4  | 1  | 4  | 1  |
| 3  | 0  | 2  | 3  | 2  | 3  | 3  |

|    |    |    |    |    |    |    |
|----|----|----|----|----|----|----|
| 3  | 0  | 1  | 4  | 1  | 4  | 1  |
| 0  | 0  | 1  | 99 | 1  | 4  | 1  |
| 3  | 0  | 2  | 3  | 2  | 3  | 1  |
| 3  | 0  | 1  | 4  | 1  | 4  | 1  |
| 3  | 0  | 4  | 3  | 1  | 3  | 1  |
| 3  | 0  | 1  | 4  | 2  | 3  | 2  |
| 0  | 0  | 99 | 3  | 2  | 3  | 2  |
| 3  | 0  | 4  | 4  | 1  | 4  | 4  |
| 3  | 0  | 1  | 3  | 1  | 3  | 1  |
| 3  | 0  | 1  | 4  | 1  | 1  | 1  |
| 3  | 0  | 1  | 4  | 1  | 4  | 1  |
| 3  | 0  | 2  | 3  | 1  | 3  | 2  |
| 2  | 0  | 1  | 4  | 1  | 4  | 1  |
| 3  | 0  | 2  | 4  | 2  | 3  | 1  |
| 3  | 0  | 1  | 4  | 1  | 4  | 1  |
| 3  | 0  | 1  | 4  | 1  | 4  | 1  |
| 3  | 0  | 1  | 4  | 1  | 4  | 1  |
| 3  | 0  | 1  | 4  | 1  | 4  | 1  |
| 2  | 2  | 2  | 3  | 1  | 3  | 4  |
| 3  | 0  | 2  | 3  | 2  | 3  | 2  |
| 3  | 0  | 99 | 99 | 99 | 99 | 99 |
| 3  | 0  | 1  | 4  | 1  | 4  | 1  |
| 3  | 0  | 3  | 3  | 2  | 3  | 2  |
| 3  | 0  | 4  | 4  | 1  | 4  | 1  |
| 0  | 1  | 4  | 1  | 4  | 1  | 4  |
| 0  | 0  | 1  | 4  | 1  | 4  | 1  |
| 3  | 0  | 1  | 4  | 1  | 4  | 1  |
| 3  | 0  | 1  | 4  | 1  | 4  | 1  |
| 3  | 0  | 1  | 4  | 1  | 4  | 1  |
| 3  | 0  | 1  | 4  | 1  | 4  | 1  |
| 2  | 2  | 2  | 3  | 2  | 3  | 2  |
| 2  | 2  | 2  | 4  | 1  | 4  | 1  |
| 3  | 0  | 4  | 4  | 1  | 4  | 1  |
| 3  | 0  | 2  | 4  | 1  | 4  | 3  |
| 3  | 0  | 1  | 4  | 1  | 4  | 1  |
| 3  | 0  | 2  | 4  | 1  | 4  | 1  |
| 99 | 99 | 3  | 4  | 1  | 4  | 1  |
| 3  | 0  | 1  | 4  | 1  | 4  | 1  |
| 3  | 0  | 1  | 1  | 1  | 1  | 1  |
| 3  | 0  | 1  | 1  | 1  | 1  | 1  |
| 3  | 0  | 1  | 1  | 1  | 4  | 1  |
| 0  | 2  | 1  | 4  | 1  | 4  | 2  |
| 3  | 0  | 1  | 4  | 4  | 4  | 1  |
| 3  | 0  | 2  | 4  | 1  | 1  | 1  |
| 3  | 0  | 1  | 4  | 1  | 1  | 1  |
| 2  | 2  | 1  | 4  | 1  | 4  | 1  |
| 3  | 0  | 2  | 4  | 2  | 4  | 2  |
| 3  | 0  | 1  | 4  | 1  | 4  | 1  |



|    |    |    |   |    |    |   |
|----|----|----|---|----|----|---|
| 3  | 0  | 2  | 4 | 1  | 4  | 1 |
| 3  | 0  | 2  | 4 | 2  | 4  | 2 |
| 3  | 0  | 2  | 3 | 2  | 3  | 3 |
| 3  | 0  | 2  | 4 | 1  | 4  | 2 |
| 0  | 0  | 2  | 2 | 2  | 2  | 2 |
| 3  | 0  | 1  | 4 | 1  | 4  | 1 |
| 2  | 2  | 3  | 3 | 2  | 3  | 3 |
| 2  | 2  | 99 | 4 | 1  | 4  | 1 |
| 3  | 0  | 1  | 4 | 1  | 1  | 1 |
| 3  | 0  | 3  | 2 | 2  | 3  | 3 |
| 3  | 0  | 1  | 4 | 1  | 4  | 1 |
| 3  | 0  | 1  | 4 | 1  | 4  | 1 |
| 3  | 0  | 1  | 4 | 1  | 4  | 1 |
| 3  | 0  | 1  | 4 | 1  | 4  | 2 |
| 3  | 2  | 2  | 4 | 1  | 4  | 2 |
| 3  | 0  | 1  | 4 | 1  | 4  | 1 |
| 3  | 0  | 1  | 1 | 1  | 1  | 1 |
| 3  | 0  | 1  | 4 | 1  | 4  | 1 |
| 3  | 0  | 2  | 3 | 1  | 4  | 1 |
| 3  | 0  | 4  | 1 | 1  | 4  | 1 |
| 3  | 0  | 1  | 4 | 1  | 3  | 1 |
| 3  | 0  | 1  | 4 | 1  | 3  | 2 |
| 99 | 99 | 2  | 3 | 2  | 2  | 2 |
| 3  | 0  | 4  | 4 | 99 | 4  | 2 |
| 3  | 0  | 1  | 4 | 1  | 1  | 1 |
| 3  | 0  | 4  | 4 | 4  | 4  | 3 |
| 3  | 0  | 1  | 4 | 1  | 4  | 1 |
| 3  | 0  | 1  | 4 | 1  | 1  | 1 |
| 3  | 0  | 1  | 3 | 1  | 1  | 1 |
| 3  | 0  | 1  | 4 | 1  | 4  | 1 |
| 3  | 0  | 1  | 4 | 1  | 99 | 1 |
| 3  | 0  | 2  | 3 | 2  | 3  | 2 |
| 3  | 0  | 99 | 4 | 1  | 4  | 1 |
| 3  | 0  | 1  | 4 | 1  | 4  | 1 |
| 2  | 0  | 2  | 2 | 1  | 4  | 1 |
| 3  | 0  | 1  | 4 | 1  | 4  | 1 |
| 0  | 0  | 1  | 3 | 1  | 4  | 1 |
| 3  | 0  | 1  | 1 | 1  | 4  | 1 |
| 3  | 0  | 1  | 4 | 1  | 4  | 1 |
| 3  | 0  | 2  | 3 | 1  | 3  | 2 |
| 3  | 0  | 1  | 4 | 1  | 4  | 1 |
| 3  | 0  | 1  | 4 | 1  | 4  | 1 |
| 3  | 0  | 2  | 4 | 1  | 4  | 1 |
| 3  | 0  | 1  | 4 | 1  | 4  | 1 |
| 3  | 0  | 1  | 3 | 2  | 3  | 1 |
| 3  | 0  | 1  | 4 | 1  | 4  | 1 |
| 3  | 0  | 2  | 4 | 2  | 4  | 2 |
| 3  | 0  | 1  | 4 | 1  | 4  | 1 |

|    |    |    |    |    |    |    |
|----|----|----|----|----|----|----|
| 3  | 0  | 1  | 4  | 1  | 4  | 1  |
| 3  | 0  | 1  | 4  | 1  | 4  | 1  |
| 3  | 0  | 3  | 3  | 2  | 3  | 3  |
| 3  | 0  | 4  | 4  | 99 | 4  | 1  |
| 3  | 0  | 1  | 4  | 1  | 4  | 1  |
| 3  | 0  | 99 | 99 | 99 | 99 | 99 |
| 3  | 0  | 4  | 4  | 1  | 4  | 1  |
| 3  | 0  | 1  | 4  | 2  | 3  | 4  |
| 3  | 0  | 1  | 4  | 1  | 4  | 1  |
| 3  | 0  | 3  | 4  | 2  | 3  | 2  |
| 3  | 0  | 1  | 4  | 1  | 4  | 1  |
| 3  | 0  | 1  | 4  | 1  | 3  | 2  |
| 3  | 0  | 1  | 4  | 1  | 4  | 1  |
| 2  | 2  | 2  | 3  | 2  | 3  | 2  |
| 3  | 0  | 1  | 4  | 1  | 4  | 1  |
| 3  | 0  | 3  | 3  | 2  | 3  | 2  |
| 3  | 0  | 2  | 3  | 2  | 2  | 2  |
| 3  | 0  | 2  | 3  | 2  | 3  | 2  |
| 3  | 0  | 1  | 4  | 1  | 4  | 1  |
| 3  | 0  | 3  | 4  | 99 | 3  | 2  |
| 3  | 0  | 1  | 4  | 1  | 4  | 1  |
| 3  | 0  | 4  | 4  | 2  | 4  | 2  |
| 3  | 0  | 1  | 4  | 1  | 4  | 1  |
| 3  | 0  | 1  | 4  | 1  | 4  | 1  |
| 3  | 0  | 1  | 4  | 1  | 1  | 1  |
| 3  | 0  | 2  | 2  | 2  | 2  | 2  |
| 2  | 2  | 3  | 4  | 1  | 4  | 3  |
| 3  | 0  | 3  | 3  | 3  | 3  | 3  |
| 3  | 0  | 1  | 4  | 1  | 4  | 1  |
| 3  | 0  | 1  | 4  | 1  | 4  | 1  |
| 3  | 0  | 1  | 4  | 1  | 4  | 1  |
| 3  | 0  | 1  | 4  | 1  | 4  | 1  |
| 3  | 0  | 1  | 4  | 1  | 4  | 1  |
| 3  | 0  | 1  | 4  | 1  | 4  | 1  |
| 3  | 0  | 99 | 4  | 1  | 4  | 1  |
| 3  | 0  | 4  | 4  | 1  | 4  | 1  |
| 3  | 0  | 1  | 4  | 1  | 4  | 1  |
| 99 | 99 | 99 | 99 | 99 | 99 | 99 |
| 3  | 0  | 1  | 4  | 1  | 4  | 1  |
| 3  | 0  | 99 | 4  | 1  | 4  | 1  |
| 3  | 0  | 2  | 4  | 4  | 4  | 99 |
| 3  | 0  | 2  | 3  | 2  | 3  | 2  |
| 3  | 0  | 1  | 4  | 2  | 4  | 1  |
| 3  | 0  | 2  | 3  | 1  | 4  | 2  |
| 2  | 2  | 99 | 1  | 1  | 1  | 1  |
| 3  | 0  | 2  | 3  | 2  | 3  | 3  |
| 3  | 0  | 1  | 4  | 1  | 1  | 1  |
| 3  | 0  | 1  | 2  | 99 | 99 | 2  |
| 3  | 0  | 3  | 4  | 2  | 3  | 3  |

|    |    |    |    |    |    |    |
|----|----|----|----|----|----|----|
| 3  | 0  | 3  | 4  | 1  | 4  | 99 |
| 3  | 0  | 99 | 1  | 1  | 4  | 1  |
| 3  | 0  | 1  | 1  | 1  | 1  | 1  |
| 3  | 0  | 99 | 3  | 2  | 3  | 99 |
| 99 | 2  | 99 | 4  | 99 | 99 | 2  |
| 3  | 0  | 1  | 4  | 1  | 4  | 99 |
| 2  | 2  | 4  | 4  | 4  | 4  | 4  |
| 3  | 0  | 3  | 4  | 1  | 3  | 2  |
| 3  | 0  | 2  | 3  | 2  | 3  | 99 |
| 3  | 0  | 1  | 1  | 1  | 1  | 1  |
| 3  | 0  | 3  | 3  | 99 | 99 | 3  |
| 3  | 0  | 1  | 4  | 1  | 4  | 1  |
| 3  | 0  | 4  | 4  | 1  | 4  | 1  |
| 3  | 0  | 99 | 99 | 99 | 4  | 1  |
| 3  | 2  | 3  | 4  | 1  | 4  | 2  |
| 3  | 0  | 1  | 4  | 1  | 4  | 1  |
| 3  | 0  | 1  | 4  | 1  | 4  | 1  |
| 3  | 0  | 99 | 4  | 1  | 4  | 1  |
| 3  | 0  | 2  | 3  | 1  | 1  | 1  |
| 3  | 0  | 4  | 4  | 1  | 1  | 1  |
| 3  | 0  | 1  | 4  | 1  | 4  | 1  |
| 3  | 0  | 2  | 3  | 1  | 3  | 1  |
| 3  | 0  | 99 | 4  | 1  | 4  | 1  |
| 3  | 0  | 99 | 99 | 99 | 99 | 99 |
| 3  | 0  | 3  | 4  | 2  | 4  | 1  |
| 3  | 0  | 2  | 3  | 2  | 3  | 2  |
| 3  | 0  | 1  | 4  | 1  | 4  | 1  |
| 3  | 0  | 2  | 3  | 2  | 4  | 1  |
| 3  | 0  | 2  | 4  | 1  | 4  | 4  |
| 0  | 0  | 2  | 4  | 1  | 4  | 4  |
| 3  | 0  | 1  | 4  | 1  | 4  | 1  |
| 3  | 0  | 1  | 4  | 1  | 4  | 1  |
| 3  | 0  | 2  | 4  | 1  | 4  | 3  |
| 3  | 0  | 1  | 3  | 2  | 4  | 2  |
| 3  | 0  | 2  | 3  | 2  | 3  | 2  |
| 3  | 0  | 1  | 4  | 1  | 4  | 1  |
| 0  | 0  | 99 | 4  | 2  | 4  | 1  |
| 99 | 99 | 99 | 99 | 99 | 99 | 99 |
| 3  | 0  | 1  | 4  | 1  | 4  | 99 |
| 3  | 0  | 1  | 4  | 1  | 4  | 1  |
| 3  | 0  | 1  | 4  | 1  | 4  | 1  |
| 3  | 0  | 4  | 4  | 1  | 4  | 99 |
| 3  | 0  | 1  | 4  | 1  | 1  | 1  |
| 3  | 0  | 1  | 3  | 1  | 4  | 1  |
| 3  | 0  | 1  | 4  | 1  | 4  | 1  |
| 3  | 0  | 1  | 4  | 1  | 4  | 1  |
| 3  | 0  | 1  | 4  | 2  | 4  | 1  |
| 3  | 0  | 1  | 4  | 1  | 4  | 1  |

|    |    |    |    |    |    |    |
|----|----|----|----|----|----|----|
| 99 | 99 | 1  | 4  | 99 | 99 | 99 |
| 1  | 0  | 3  | 3  | 3  | 3  | 3  |
| 3  | 0  | 99 | 4  | 1  | 4  | 1  |
| 3  | 0  | 1  | 3  | 1  | 4  | 1  |
| 3  | 0  | 1  | 1  | 1  | 4  | 1  |
| 3  | 0  | 2  | 99 | 2  | 3  | 2  |
| 3  | 0  | 1  | 4  | 1  | 4  | 1  |
| 3  | 0  | 99 | 3  | 2  | 3  | 2  |
| 3  | 0  | 99 | 3  | 2  | 3  | 2  |
| 3  | 0  | 1  | 1  | 1  | 4  | 1  |
| 3  | 0  | 1  | 4  | 1  | 4  | 1  |
| 3  | 0  | 1  | 4  | 1  | 4  | 1  |
| 3  | 0  | 1  | 1  | 1  | 4  | 1  |
| 3  | 0  | 1  | 4  | 1  | 4  | 1  |
| 3  | 0  | 1  | 4  | 1  | 4  | 1  |
| 3  | 0  | 1  | 4  | 1  | 4  | 1  |
| 3  | 0  | 4  | 4  | 1  | 4  | 2  |
| 2  | 2  | 1  | 4  | 1  | 4  | 1  |
| 3  | 0  | 1  | 4  | 1  | 4  | 1  |
| 2  | 2  | 3  | 4  | 2  | 4  | 1  |
| 99 | 99 | 99 | 99 | 99 | 99 | 3  |
| 3  | 0  | 4  | 4  | 2  | 3  | 2  |
| 3  | 0  | 1  | 4  | 1  | 4  | 1  |
| 3  | 0  | 4  | 4  | 1  | 4  | 1  |
| 3  | 0  | 1  | 4  | 1  | 4  | 1  |
| 3  | 0  | 2  | 3  | 2  | 3  | 2  |
| 3  | 2  | 2  | 3  | 2  | 3  | 2  |
| 3  | 0  | 4  | 99 | 99 | 4  | 1  |
| 3  | 0  | 2  | 4  | 1  | 4  | 1  |
| 3  | 0  | 1  | 4  | 1  | 4  | 1  |
| 3  | 0  | 4  | 4  | 1  | 1  | 1  |
| 3  | 0  | 4  | 4  | 1  | 4  | 1  |
| 3  | 0  | 1  | 1  | 1  | 4  | 1  |
| 3  | 0  | 2  | 4  | 2  | 4  | 2  |
| 3  | 0  | 2  | 4  | 1  | 4  | 2  |
| 3  | 0  | 2  | 3  | 2  | 1  | 2  |
| 3  | 0  | 1  | 4  | 1  | 4  | 1  |
| 3  | 0  | 4  | 4  | 1  | 4  | 1  |
| 3  | 0  | 1  | 4  | 1  | 4  | 1  |
| 3  | 0  | 1  | 1  | 1  | 4  | 1  |
| 3  | 0  | 1  | 4  | 1  | 4  | 1  |
| 3  | 0  | 1  | 4  | 1  | 4  | 1  |
| 3  | 0  | 4  | 4  | 1  | 4  | 1  |
| 3  | 0  | 4  | 4  | 4  | 4  | 4  |
| 3  | 0  | 99 | 2  | 2  | 99 | 2  |
| 3  | 0  | 1  | 4  | 2  | 3  | 1  |

|    |   |    |    |    |    |    |
|----|---|----|----|----|----|----|
| 2  | 0 | 3  | 4  | 2  | 4  | 2  |
| 1  | 1 | 1  | 1  | 1  | 1  | 1  |
| 2  | 0 | 2  | 2  | 2  | 3  | 2  |
| 2  | 2 | 1  | 4  | 1  | 4  | 1  |
| 3  | 0 | 1  | 4  | 1  | 4  | 1  |
| 3  | 0 | 1  | 4  | 1  | 4  | 4  |
| 3  | 0 | 1  | 4  | 1  | 4  | 1  |
| 3  | 0 | 4  | 4  | 1  | 4  | 1  |
| 3  | 0 | 99 | 4  | 4  | 4  | 4  |
| 3  | 0 | 1  | 4  | 1  | 4  | 1  |
| 3  | 0 | 1  | 4  | 1  | 4  | 1  |
| 3  | 0 | 1  | 1  | 1  | 1  | 99 |
| 3  | 0 | 1  | 4  | 1  | 4  | 1  |
| 3  | 0 | 2  | 2  | 2  | 3  | 2  |
| 3  | 0 | 2  | 3  | 1  | 3  | 2  |
| 3  | 0 | 99 | 4  | 1  | 4  | 1  |
| 3  | 0 | 2  | 3  | 2  | 3  | 2  |
| 3  | 0 | 99 | 4  | 1  | 4  | 1  |
| 3  | 0 | 1  | 99 | 1  | 1  | 1  |
| 3  | 0 | 1  | 4  | 1  | 4  | 1  |
| 3  | 2 | 99 | 4  | 1  | 4  | 1  |
| 3  | 0 | 1  | 4  | 1  | 4  | 1  |
| 3  | 0 | 99 | 4  | 1  | 4  | 1  |
| 3  | 0 | 99 | 3  | 1  | 4  | 99 |
| 99 | 2 | 2  | 3  | 2  | 4  | 2  |
| 3  | 2 | 1  | 4  | 1  | 4  | 1  |
| 3  | 0 | 1  | 4  | 1  | 4  | 1  |
| 3  | 0 | 1  | 4  | 1  | 4  | 1  |
| 3  | 0 | 1  | 4  | 2  | 3  | 1  |
| 3  | 0 | 3  | 4  | 2  | 3  | 99 |
| 3  | 0 | 2  | 4  | 1  | 4  | 1  |
| 3  | 0 | 1  | 2  | 2  | 3  | 99 |
| 3  | 0 | 1  | 4  | 1  | 4  | 1  |
| 3  | 0 | 1  | 4  | 1  | 4  | 1  |
| 3  | 0 | 1  | 4  | 1  | 4  | 1  |
| 3  | 0 | 2  | 4  | 1  | 4  | 1  |
| 3  | 0 | 1  | 4  | 2  | 4  | 1  |
| 2  | 2 | 99 | 99 | 99 | 99 | 99 |
| 3  | 0 | 1  | 4  | 1  | 4  | 1  |
| 3  | 0 | 99 | 4  | 1  | 4  | 1  |
| 3  | 0 | 1  | 4  | 1  | 4  | 1  |
| 3  | 0 | 99 | 99 | 99 | 99 | 99 |
| 3  | 0 | 3  | 4  | 2  | 3  | 3  |
| 0  | 0 | 4  | 4  | 4  | 4  | 4  |
| 3  | 0 | 2  | 4  | 1  | 4  | 1  |
| 3  | 0 | 1  | 4  | 1  | 4  | 1  |
| 3  | 0 | 1  | 4  | 1  | 1  | 1  |

|    |    |    |    |    |    |    |
|----|----|----|----|----|----|----|
| 3  | 0  | 2  | 3  | 2  | 3  | 2  |
| 99 | 99 | 2  | 3  | 2  | 3  | 3  |
| 3  | 0  | 1  | 4  | 1  | 4  | 1  |
| 3  | 0  | 1  | 4  | 1  | 4  | 1  |
| 3  | 0  | 1  | 4  | 1  | 4  | 1  |
| 3  | 0  | 1  | 4  | 1  | 4  | 1  |
| 3  | 0  | 1  | 4  | 1  | 4  | 1  |
| 3  | 0  | 99 | 3  | 2  | 3  | 2  |
| 3  | 0  | 2  | 4  | 1  | 4  | 1  |
| 3  | 0  | 1  | 1  | 2  | 3  | 2  |
| 3  | 0  | 4  | 3  | 3  | 3  | 3  |
| 3  | 0  | 2  | 4  | 1  | 1  | 1  |
| 3  | 0  | 2  | 4  | 1  | 1  | 1  |
| 3  | 0  | 2  | 3  | 2  | 3  | 2  |
| 3  | 0  | 2  | 3  | 3  | 2  | 2  |
| 3  | 0  | 1  | 4  | 1  | 4  | 1  |
| 3  | 0  | 2  | 3  | 1  | 3  | 1  |
| 3  | 0  | 1  | 4  | 2  | 3  | 1  |
| 3  | 0  | 2  | 3  | 2  | 3  | 2  |
| 0  | 1  | 99 | 4  | 1  | 4  | 1  |
| 3  | 0  | 1  | 4  | 1  | 4  | 1  |
| 3  | 0  | 2  | 4  | 1  | 4  | 2  |
| 3  | 0  | 3  | 3  | 1  | 3  | 1  |
| 3  | 0  | 1  | 4  | 1  | 4  | 1  |
| 99 | 99 | 3  | 3  | 2  | 3  | 2  |
| 3  | 0  | 99 | 4  | 1  | 4  | 1  |
| 3  | 0  | 4  | 4  | 1  | 4  | 1  |
| 3  | 0  | 1  | 4  | 1  | 4  | 1  |
| 2  | 2  | 99 | 4  | 1  | 4  | 1  |
| 3  | 0  | 3  | 4  | 1  | 4  | 1  |
| 3  | 0  | 2  | 4  | 1  | 4  | 1  |
| 3  | 0  | 1  | 4  | 1  | 4  | 1  |
| 3  | 0  | 2  | 3  | 2  | 3  | 2  |
| 2  | 2  | 99 | 99 | 99 | 4  | 1  |
| 3  | 0  | 99 | 99 | 99 | 99 | 99 |
| 3  | 0  | 1  | 1  | 1  | 3  | 2  |
| 3  | 0  | 4  | 4  | 1  | 4  | 1  |
| 2  | 2  | 2  | 3  | 2  | 3  | 2  |
| 3  | 0  | 3  | 4  | 1  | 3  | 3  |
| 3  | 0  | 3  | 4  | 1  | 4  | 1  |
| 3  | 0  | 1  | 4  | 1  | 4  | 1  |
| 3  | 0  | 1  | 4  | 1  | 4  | 1  |
| 3  | 0  | 1  | 4  | 1  | 4  | 1  |
| 3  | 0  | 1  | 4  | 1  | 4  | 1  |
| 3  | 0  | 1  | 4  | 1  | 4  | 1  |
| 3  | 0  | 1  | 4  | 1  | 4  | 1  |
| 3  | 0  | 1  | 4  | 1  | 4  | 2  |
| 3  | 0  | 2  | 4  | 1  | 4  | 1  |

|   |   |    |    |    |   |    |
|---|---|----|----|----|---|----|
| 3 | 0 | 4  | 4  | 1  | 4 | 1  |
| 3 | 0 | 2  | 3  | 1  | 4 | 2  |
| 3 | 0 | 1  | 4  | 1  | 4 | 1  |
| 0 | 0 | 1  | 99 | 99 | 1 | 1  |
| 3 | 0 | 2  | 3  | 1  | 3 | 1  |
| 3 | 0 | 1  | 4  | 1  | 4 | 1  |
| 3 | 0 | 3  | 3  | 1  | 3 | 2  |
| 3 | 0 | 1  | 4  | 1  | 4 | 1  |
| 3 | 0 | 3  | 4  | 1  | 4 | 1  |
| 0 | 0 | 3  | 4  | 1  | 3 | 2  |
| 3 | 0 | 3  | 3  | 2  | 3 | 2  |
| 3 | 0 | 3  | 3  | 2  | 3 | 2  |
| 3 | 0 | 2  | 4  | 1  | 4 | 1  |
| 3 | 0 | 4  | 3  | 1  | 3 | 1  |
| 3 | 0 | 99 | 4  | 2  | 2 | 2  |
| 3 | 0 | 99 | 4  | 1  | 4 | 99 |
| 3 | 0 | 2  | 3  | 2  | 3 | 2  |
| 3 | 0 | 99 | 4  | 1  | 1 | 1  |
| 3 | 0 | 2  | 4  | 99 | 1 | 2  |
| 3 | 0 | 1  | 1  | 1  | 1 | 1  |
| 3 | 0 | 2  | 4  | 1  | 4 | 1  |
| 3 | 0 | 2  | 3  | 2  | 3 | 2  |
| 3 | 0 | 1  | 1  | 1  | 1 | 1  |
| 3 | 0 | 1  | 4  | 1  | 4 | 1  |
| 3 | 0 | 2  | 4  | 1  | 4 | 1  |
| 3 | 0 | 4  | 3  | 2  | 3 | 2  |
| 3 | 0 | 3  | 3  | 1  | 1 | 1  |
| 1 | 1 | 2  | 3  | 4  | 4 | 1  |
| 3 | 0 | 1  | 4  | 1  | 4 | 1  |
| 3 | 0 | 1  | 4  | 1  | 4 | 1  |
| 3 | 0 | 1  | 4  | 1  | 4 | 1  |
| 3 | 0 | 1  | 4  | 1  | 4 | 1  |
| 3 | 0 | 1  | 4  | 1  | 4 | 1  |
| 3 | 0 | 1  | 4  | 1  | 4 | 1  |
| 3 | 0 | 2  | 3  | 2  | 3 | 2  |
| 3 | 0 | 1  | 4  | 1  | 4 | 1  |
| 3 | 0 | 4  | 4  | 2  | 4 | 2  |
| 2 | 2 | 4  | 4  | 1  | 4 | 1  |
| 3 | 0 | 2  | 3  | 1  | 4 | 1  |
| 3 | 0 | 1  | 4  | 1  | 4 | 1  |
| 3 | 0 | 1  | 4  | 1  | 4 | 1  |
| 3 | 0 | 2  | 4  | 2  | 4 | 1  |
| 3 | 0 | 1  | 3  | 1  | 4 | 1  |
| 3 | 0 | 1  | 4  | 1  | 4 | 1  |
| 3 | 0 | 2  | 4  | 1  | 3 | 1  |
| 3 | 0 | 2  | 3  | 2  | 3 | 2  |
| 1 | 0 | 1  | 4  | 1  | 4 | 1  |
| 3 | 0 | 1  | 4  | 1  | 4 | 1  |
| 3 | 0 | 2  | 4  | 2  | 3 | 1  |

|    |    |    |    |    |    |    |
|----|----|----|----|----|----|----|
| 3  | 0  | 1  | 4  | 1  | 4  | 1  |
| 3  | 0  | 1  | 1  | 99 | 1  | 1  |
| 3  | 0  | 2  | 4  | 1  | 1  | 1  |
| 3  | 0  | 1  | 4  | 1  | 4  | 1  |
| 3  | 0  | 1  | 4  | 1  | 4  | 1  |
| 3  | 0  | 1  | 4  | 1  | 4  | 1  |
| 3  | 0  | 1  | 4  | 1  | 4  | 1  |
| 3  | 0  | 1  | 4  | 1  | 4  | 1  |
| 3  | 0  | 1  | 4  | 1  | 4  | 1  |
| 3  | 0  | 4  | 4  | 1  | 4  | 1  |
| 3  | 0  | 2  | 4  | 1  | 4  | 4  |
| 2  | 2  | 3  | 2  | 3  | 4  | 3  |
| 3  | 0  | 1  | 4  | 1  | 4  | 1  |
| 3  | 0  | 1  | 4  | 1  | 4  | 1  |
| 3  | 0  | 2  | 3  | 1  | 4  | 1  |
| 3  | 0  | 1  | 4  | 1  | 4  | 1  |
| 3  | 0  | 3  | 4  | 2  | 4  | 1  |
| 2  | 1  | 2  | 3  | 2  | 3  | 2  |
| 99 | 99 | 99 | 99 | 99 | 99 | 99 |
| 3  | 0  | 99 | 99 | 99 | 99 | 99 |
| 3  | 0  | 4  | 4  | 1  | 4  | 1  |
| 3  | 2  | 2  | 3  | 2  | 4  | 1  |
| 1  | 0  | 2  | 3  | 1  | 4  | 1  |
| 3  | 0  | 1  | 4  | 1  | 4  | 4  |
| 3  | 0  | 99 | 99 | 1  | 4  | 99 |
| 3  | 0  | 1  | 3  | 1  | 3  | 1  |
| 3  | 0  | 2  | 3  | 2  | 3  | 2  |
| 2  | 2  | 1  | 3  | 1  | 3  | 1  |
| 3  | 0  | 2  | 3  | 2  | 3  | 2  |
| 0  | 2  | 2  | 2  | 2  | 2  | 2  |
| 3  | 0  | 99 | 99 | 99 | 99 | 99 |
| 3  | 0  | 2  | 3  | 1  | 3  | 3  |
| 3  | 0  | 1  | 1  | 1  | 1  | 1  |
| 3  | 0  | 99 | 4  | 1  | 4  | 1  |
| 3  | 0  | 1  | 4  | 1  | 4  | 1  |
| 3  | 0  | 1  | 4  | 1  | 1  | 1  |
| 3  | 0  | 1  | 4  | 1  | 1  | 4  |
| 0  | 0  | 3  | 4  | 1  | 4  | 1  |
| 0  | 0  | 1  | 1  | 1  | 1  | 1  |
| 3  | 0  | 2  | 4  | 1  | 4  | 1  |
| 3  | 0  | 1  | 4  | 1  | 4  | 1  |
| 3  | 0  | 4  | 99 | 99 | 99 | 99 |
| 3  | 0  | 1  | 4  | 1  | 4  | 1  |
| 3  | 0  | 1  | 4  | 1  | 4  | 2  |
| 3  | 2  | 4  | 4  | 1  | 4  | 1  |
| 3  | 0  | 4  | 4  | 1  | 4  | 1  |
| 3  | 0  | 1  | 4  | 1  | 4  | 1  |
| 1  | 1  | 4  | 3  | 3  | 3  | 3  |



|    |   |    |    |    |    |    |
|----|---|----|----|----|----|----|
| 3  | 0 | 1  | 4  | 1  | 4  | 1  |
| 99 | 0 | 2  | 2  | 2  | 2  | 3  |
| 3  | 0 | 2  | 4  | 1  | 4  | 1  |
| 3  | 0 | 1  | 1  | 1  | 4  | 1  |
| 3  | 0 | 2  | 3  | 2  | 3  | 3  |
| 0  | 0 | 99 | 99 | 99 | 99 | 99 |
| 3  | 0 | 1  | 3  | 2  | 3  | 2  |
| 3  | 0 | 1  | 4  | 1  | 4  | 1  |
| 3  | 0 | 1  | 4  | 1  | 4  | 1  |
| 3  | 0 | 99 | 4  | 1  | 4  | 4  |
| 3  | 0 | 4  | 4  | 4  | 4  | 1  |
| 3  | 0 | 1  | 4  | 1  | 4  | 1  |
| 3  | 0 | 3  | 3  | 1  | 3  | 4  |
| 3  | 0 | 2  | 4  | 1  | 4  | 1  |
| 0  | 0 | 1  | 1  | 1  | 2  | 2  |
| 3  | 0 | 1  | 4  | 1  | 4  | 1  |
| 3  | 0 | 1  | 4  | 1  | 4  | 1  |
| 3  | 0 | 3  | 4  | 1  | 1  | 1  |
| 3  | 0 | 4  | 4  | 1  | 4  | 1  |
| 3  | 0 | 1  | 4  | 1  | 4  | 1  |
| 3  | 0 | 1  | 4  | 1  | 4  | 2  |
| 3  | 0 | 2  | 3  | 2  | 3  | 3  |
| 2  | 2 | 2  | 4  | 2  | 3  | 3  |
| 1  | 1 | 1  | 1  | 1  | 1  | 1  |
| 3  | 0 | 1  | 4  | 1  | 4  | 1  |
| 2  | 2 | 2  | 3  | 2  | 3  | 2  |
| 3  | 0 | 99 | 4  | 1  | 4  | 1  |
| 3  | 0 | 3  | 4  | 1  | 4  | 2  |
| 3  | 0 | 3  | 2  | 2  | 2  | 2  |
| 3  | 0 | 1  | 4  | 1  | 4  | 1  |
| 3  | 1 | 1  | 4  | 1  | 4  | 1  |
| 3  | 0 | 2  | 4  | 1  | 4  | 1  |
| 3  | 0 | 4  | 4  | 1  | 4  | 1  |
| 3  | 0 | 1  | 4  | 1  | 4  | 1  |
| 3  | 0 | 1  | 4  | 1  | 4  | 1  |
| 3  | 0 | 99 | 3  | 2  | 3  | 2  |
| 3  | 0 | 2  | 4  | 1  | 4  | 1  |
| 3  | 0 | 2  | 2  | 2  | 3  | 2  |
| 3  | 0 | 2  | 4  | 4  | 4  | 1  |
| 3  | 0 | 2  | 4  | 1  | 4  | 3  |
| 2  | 2 | 1  | 4  | 1  | 4  | 1  |
| 2  | 2 | 1  | 3  | 2  | 3  | 3  |
| 2  | 2 | 2  | 3  | 3  | 3  | 2  |
| 3  | 0 | 1  | 4  | 1  | 4  | 4  |
| 3  | 0 | 1  | 4  | 1  | 4  | 1  |
| 3  | 0 | 1  | 4  | 1  | 4  | 1  |
| 3  | 0 | 2  | 3  | 2  | 3  | 2  |
| 3  | 0 | 2  | 4  | 2  | 3  | 2  |

|    |   |    |    |    |    |    |
|----|---|----|----|----|----|----|
| 3  | 0 | 1  | 4  | 1  | 4  | 1  |
| 3  | 0 | 99 | 4  | 1  | 4  | 4  |
| 3  | 0 | 1  | 4  | 1  | 3  | 1  |
| 3  | 0 | 1  | 4  | 1  | 4  | 1  |
| 3  | 0 | 1  | 4  | 1  | 4  | 1  |
| 3  | 0 | 4  | 4  | 1  | 1  | 1  |
| 3  | 0 | 3  | 3  | 3  | 99 | 1  |
| 3  | 0 | 2  | 3  | 2  | 3  | 1  |
| 3  | 0 | 1  | 4  | 1  | 4  | 1  |
| 3  | 0 | 3  | 99 | 99 | 4  | 99 |
| 3  | 2 | 2  | 3  | 2  | 3  | 2  |
| 3  | 0 | 1  | 4  | 1  | 4  | 1  |
| 3  | 0 | 3  | 4  | 1  | 4  | 2  |
| 2  | 0 | 4  | 4  | 4  | 4  | 4  |
| 0  | 0 | 3  | 4  | 1  | 4  | 4  |
| 3  | 0 | 1  | 4  | 1  | 4  | 1  |
| 3  | 0 | 2  | 2  | 2  | 2  | 2  |
| 3  | 0 | 99 | 3  | 2  | 4  | 3  |
| 99 | 0 | 2  | 2  | 2  | 2  | 2  |
| 3  | 0 | 1  | 4  | 2  | 1  | 1  |
| 3  | 0 | 3  | 4  | 1  | 4  | 3  |
| 3  | 0 | 1  | 4  | 1  | 4  | 1  |
| 3  | 0 | 1  | 4  | 1  | 4  | 1  |
| 0  | 0 | 1  | 2  | 3  | 1  | 1  |
| 3  | 0 | 2  | 3  | 2  | 3  | 1  |
| 3  | 0 | 1  | 2  | 1  | 2  | 1  |
| 2  | 0 | 2  | 3  | 1  | 4  | 2  |
| 0  | 0 | 99 | 2  | 99 | 99 | 2  |
| 3  | 0 | 1  | 4  | 1  | 4  | 1  |
| 3  | 0 | 1  | 4  | 1  | 4  | 1  |
| 3  | 0 | 1  | 4  | 1  | 4  | 1  |
| 3  | 0 | 3  | 4  | 1  | 4  | 2  |
| 3  | 0 | 2  | 4  | 2  | 3  | 4  |
| 3  | 0 | 1  | 4  | 1  | 1  | 1  |
| 3  | 0 | 2  | 3  | 2  | 4  | 1  |
| 3  | 0 | 1  | 4  | 1  | 4  | 1  |
| 3  | 0 | 1  | 4  | 1  | 4  | 1  |
| 3  | 0 | 2  | 3  | 2  | 3  | 1  |
| 3  | 0 | 2  | 3  | 2  | 2  | 2  |
| 3  | 0 | 1  | 4  | 1  | 4  | 1  |
| 3  | 0 | 2  | 3  | 2  | 3  | 2  |
| 3  | 0 | 1  | 4  | 1  | 4  | 1  |
| 3  | 0 | 1  | 1  | 1  | 4  | 1  |
| 3  | 2 | 3  | 3  | 2  | 3  | 1  |
| 3  | 0 | 99 | 4  | 1  | 4  | 1  |
| 3  | 0 | 2  | 3  | 2  | 3  | 2  |
| 3  | 0 | 1  | 3  | 1  | 4  | 1  |
| 3  | 0 | 3  | 3  | 2  | 3  | 2  |

|    |   |    |    |    |    |    |
|----|---|----|----|----|----|----|
| 3  | 0 | 99 | 3  | 99 | 3  | 2  |
| 3  | 0 | 1  | 4  | 1  | 4  | 1  |
| 3  | 0 | 1  | 99 | 1  | 4  | 1  |
| 2  | 2 | 99 | 99 | 99 | 99 | 99 |
| 3  | 0 | 1  | 4  | 1  | 3  | 2  |
| 3  | 0 | 2  | 3  | 2  | 3  | 2  |
| 3  | 0 | 1  | 4  | 1  | 4  | 1  |
| 3  | 0 | 1  | 4  | 1  | 4  | 1  |
| 3  | 0 | 1  | 4  | 1  | 4  | 1  |
| 3  | 0 | 2  | 4  | 1  | 3  | 1  |
| 3  | 0 | 2  | 4  | 1  | 4  | 2  |
| 3  | 0 | 2  | 3  | 2  | 3  | 2  |
| 3  | 0 | 1  | 4  | 1  | 1  | 1  |
| 2  | 2 | 4  | 1  | 1  | 4  | 1  |
| 1  | 0 | 1  | 4  | 1  | 4  | 1  |
| 3  | 0 | 1  | 1  | 1  | 1  | 1  |
| 3  | 0 | 1  | 4  | 1  | 4  | 2  |
| 3  | 0 | 1  | 4  | 2  | 3  | 3  |
| 0  | 0 | 1  | 4  | 2  | 4  | 2  |
| 3  | 0 | 1  | 4  | 1  | 4  | 1  |
| 3  | 1 | 1  | 4  | 1  | 1  | 1  |
| 3  | 0 | 1  | 4  | 1  | 4  | 1  |
| 99 | 0 | 1  | 4  | 1  | 4  | 1  |
| 3  | 0 | 1  | 4  | 1  | 4  | 1  |
| 3  | 0 | 1  | 3  | 2  | 3  | 2  |
| 3  | 0 | 1  | 3  | 2  | 1  | 2  |
| 1  | 0 | 4  | 4  | 4  | 4  | 1  |
| 3  | 0 | 2  | 3  | 3  | 2  | 3  |
| 3  | 0 | 1  | 4  | 1  | 4  | 1  |
| 3  | 0 | 1  | 4  | 1  | 4  | 1  |
| 3  | 0 | 1  | 4  | 1  | 1  | 1  |
| 3  | 0 | 1  | 4  | 1  | 4  | 1  |
| 3  | 0 | 2  | 4  | 1  | 4  | 1  |
| 3  | 0 | 1  | 4  | 1  | 4  | 1  |
| 3  | 0 | 2  | 2  | 2  | 2  | 2  |
| 3  | 0 | 1  | 4  | 1  | 4  | 1  |
| 3  | 0 | 1  | 4  | 1  | 4  | 1  |
| 1  | 1 | 3  | 2  | 2  | 2  | 1  |
| 3  | 0 | 1  | 1  | 1  | 1  | 1  |
| 3  | 0 | 1  | 1  | 1  | 4  | 1  |
| 3  | 0 | 1  | 99 | 1  | 1  | 1  |
| 3  | 0 | 2  | 3  | 2  | 3  | 3  |
| 3  | 0 | 1  | 4  | 2  | 2  | 2  |
| 3  | 0 | 99 | 99 | 99 | 99 | 99 |
| 3  | 0 | 2  | 2  | 2  | 99 | 3  |
| 2  | 0 | 1  | 4  | 1  | 4  | 1  |

|    |    |    |    |    |    |    |
|----|----|----|----|----|----|----|
| 3  | 0  | 1  | 4  | 1  | 4  | 1  |
| 1  | 0  | 4  | 4  | 1  | 1  | 1  |
| 3  | 0  | 3  | 3  | 2  | 2  | 2  |
| 3  | 0  | 1  | 4  | 1  | 4  | 1  |
| 3  | 0  | 1  | 3  | 1  | 4  | 1  |
| 3  | 0  | 3  | 2  | 2  | 3  | 3  |
| 3  | 0  | 99 | 4  | 1  | 99 | 99 |
| 3  | 0  | 3  | 3  | 3  | 3  | 3  |
| 3  | 0  | 4  | 4  | 1  | 4  | 1  |
| 3  | 0  | 4  | 4  | 1  | 4  | 1  |
| 2  | 2  | 2  | 99 | 99 | 99 | 99 |
| 3  | 0  | 4  | 1  | 2  | 3  | 2  |
| 3  | 0  | 4  | 4  | 3  | 3  | 3  |
| 3  | 0  | 2  | 4  | 2  | 2  | 2  |
| 3  | 0  | 4  | 4  | 1  | 4  | 1  |
| 3  | 0  | 3  | 3  | 2  | 4  | 2  |
| 3  | 0  | 2  | 3  | 2  | 3  | 1  |
| 3  | 0  | 1  | 4  | 1  | 4  | 1  |
| 3  | 0  | 2  | 4  | 1  | 4  | 1  |
| 3  | 0  | 2  | 3  | 2  | 3  | 2  |
| 3  | 0  | 4  | 4  | 1  | 4  | 1  |
| 3  | 0  | 3  | 4  | 1  | 4  | 3  |
| 3  | 0  | 2  | 4  | 1  | 4  | 1  |
| 3  | 0  | 1  | 4  | 1  | 1  | 2  |
| 3  | 0  | 1  | 4  | 1  | 4  | 1  |
| 3  | 0  | 3  | 3  | 3  | 3  | 2  |
| 3  | 0  | 4  | 4  | 1  | 4  | 1  |
| 3  | 0  | 1  | 4  | 1  | 4  | 1  |
| 3  | 0  | 3  | 3  | 2  | 3  | 3  |
| 3  | 0  | 1  | 4  | 1  | 4  | 1  |
| 3  | 0  | 1  | 2  | 1  | 3  | 1  |
| 3  | 0  | 2  | 4  | 1  | 3  | 2  |
| 3  | 0  | 1  | 4  | 1  | 4  | 2  |
| 3  | 0  | 99 | 4  | 2  | 3  | 1  |
| 3  | 0  | 1  | 4  | 1  | 4  | 1  |
| 2  | 2  | 1  | 4  | 1  | 4  | 1  |
| 3  | 0  | 1  | 1  | 1  | 1  | 1  |
| 3  | 0  | 2  | 2  | 2  | 2  | 2  |
| 3  | 0  | 1  | 4  | 1  | 4  | 1  |
| 3  | 0  | 1  | 4  | 1  | 4  | 1  |
| 3  | 0  | 2  | 3  | 2  | 1  | 99 |
| 3  | 0  | 2  | 3  | 3  | 3  | 1  |
| 3  | 0  | 2  | 2  | 3  | 2  | 1  |
| 3  | 0  | 4  | 4  | 4  | 4  | 2  |
| 3  | 0  | 1  | 4  | 1  | 4  | 1  |
| 3  | 0  | 3  | 4  | 1  | 2  | 3  |
| 99 | 99 | 4  | 4  | 1  | 4  | 1  |
| 3  | 0  | 2  | 4  | 2  | 4  | 2  |

|   |   |    |   |   |   |    |
|---|---|----|---|---|---|----|
| 3 | 0 | 1  | 4 | 1 | 4 | 1  |
| 3 | 0 | 1  | 4 | 1 | 4 | 1  |
| 3 | 0 | 1  | 4 | 1 | 4 | 1  |
| 3 | 0 | 2  | 3 | 2 | 3 | 2  |
| 3 | 0 | 1  | 2 | 3 | 2 | 1  |
| 3 | 0 | 2  | 3 | 2 | 3 | 3  |
| 3 | 0 | 99 | 4 | 1 | 4 | 1  |
| 3 | 0 | 1  | 4 | 1 | 4 | 1  |
| 3 | 0 | 1  | 4 | 1 | 4 | 1  |
| 3 | 0 | 1  | 4 | 1 | 4 | 1  |
| 3 | 0 | 1  | 4 | 1 | 4 | 1  |
| 3 | 0 | 1  | 4 | 1 | 4 | 1  |
| 3 | 0 | 1  | 4 | 1 | 4 | 1  |
| 3 | 0 | 2  | 3 | 2 | 3 | 2  |
| 3 | 0 | 1  | 4 | 1 | 4 | 2  |
| 3 | 0 | 99 | 3 | 2 | 3 | 2  |
| 3 | 0 | 1  | 4 | 1 | 4 | 1  |
| 3 | 0 | 2  | 3 | 2 | 3 | 2  |
| 3 | 0 | 2  | 3 | 3 | 3 | 1  |
| 3 | 0 | 1  | 4 | 1 | 4 | 1  |
| 2 | 2 | 1  | 1 | 1 | 1 | 1  |
| 3 | 0 | 2  | 3 | 2 | 3 | 2  |
| 3 | 0 | 2  | 4 | 2 | 4 | 2  |
| 3 | 0 | 1  | 4 | 1 | 4 | 1  |
| 3 | 0 | 1  | 4 | 1 | 4 | 1  |
| 3 | 0 | 1  | 4 | 1 | 4 | 1  |
| 3 | 0 | 1  | 4 | 1 | 4 | 1  |
| 3 | 0 | 99 | 4 | 2 | 4 | 2  |
| 2 | 2 | 1  | 1 | 1 | 4 | 1  |
| 3 | 0 | 1  | 4 | 1 | 4 | 1  |
| 3 | 0 | 1  | 4 | 1 | 1 | 3  |
| 3 | 0 | 3  | 4 | 1 | 3 | 4  |
| 3 | 0 | 2  | 4 | 1 | 4 | 3  |
| 3 | 0 | 1  | 4 | 1 | 4 | 1  |
| 3 | 0 | 3  | 4 | 1 | 4 | 1  |
| 3 | 0 | 1  | 4 | 1 | 4 | 1  |
| 3 | 0 | 2  | 3 | 2 | 2 | 2  |
| 3 | 0 | 1  | 4 | 1 | 4 | 1  |
| 3 | 2 | 1  | 1 | 1 | 1 | 1  |
| 3 | 0 | 1  | 4 | 1 | 4 | 1  |
| 3 | 0 | 1  | 4 | 1 | 4 | 4  |
| 3 | 0 | 99 | 1 | 1 | 1 | 99 |
| 3 | 0 | 2  | 3 | 1 | 4 | 2  |
| 2 | 0 | 1  | 4 | 1 | 1 | 2  |
| 3 | 0 | 2  | 3 | 2 | 3 | 2  |
| 3 | 0 | 4  | 4 | 1 | 4 | 3  |
| 3 | 0 | 1  | 4 | 1 | 4 | 1  |
| 3 | 0 | 99 | 4 | 2 | 3 | 2  |

|   |   |   |    |    |    |    |
|---|---|---|----|----|----|----|
| 3 | 0 | 1 | 1  | 1  | 4  | 1  |
| 3 | 0 | 1 | 3  | 2  | 3  | 1  |
| 3 | 0 | 1 | 4  | 1  | 4  | 2  |
| 3 | 0 | 1 | 4  | 1  | 4  | 1  |
| 3 | 0 | 4 | 4  | 1  | 4  | 1  |
| 3 | 0 | 1 | 4  | 1  | 1  | 1  |
| 3 | 0 | 2 | 3  | 2  | 3  | 2  |
| 3 | 0 | 3 | 3  | 2  | 3  | 2  |
| 3 | 0 | 1 | 4  | 1  | 4  | 2  |
| 3 | 0 | 1 | 4  | 1  | 4  | 2  |
| 3 | 0 | 1 | 99 | 99 | 99 | 99 |
| 3 | 0 | 1 | 4  | 1  | 4  | 1  |
| 3 | 0 | 1 | 4  | 1  | 4  | 1  |
| 3 | 0 | 4 | 4  | 4  | 4  | 4  |
| 3 | 0 | 1 | 4  | 1  | 4  | 1  |
| 3 | 0 | 2 | 3  | 2  | 3  | 2  |
| 2 | 2 | 2 | 4  | 2  | 3  | 2  |
| 3 | 0 | 2 | 2  | 2  | 3  | 2  |
| 0 | 0 | 3 | 3  | 2  | 1  | 2  |
| 3 | 0 | 1 | 1  | 1  | 1  | 1  |
| 3 | 0 | 1 | 4  | 1  | 4  | 1  |
| 3 | 0 | 1 | 4  | 1  | 4  | 1  |
| 3 | 0 | 3 | 3  | 2  | 1  | 3  |
| 3 | 0 | 1 | 4  | 1  | 4  | 1  |
| 3 | 0 | 1 | 3  | 1  | 3  | 1  |
| 3 | 0 | 1 | 4  | 1  | 4  | 1  |
| 3 | 0 | 4 | 4  | 1  | 4  | 1  |
| 3 | 0 | 1 | 4  | 1  | 4  | 1  |
| 3 | 0 | 2 | 3  | 2  | 3  | 1  |
| 3 | 0 | 2 | 3  | 2  | 3  | 2  |
| 3 | 0 | 1 | 3  | 1  | 3  | 2  |
| 3 | 0 | 1 | 3  | 2  | 3  | 2  |
| 3 | 0 | 1 | 1  | 1  | 1  | 1  |
| 1 | 0 | 1 | 4  | 1  | 4  | 1  |
| 3 | 0 | 3 | 4  | 1  | 4  | 2  |
| 3 | 0 | 1 | 4  | 1  | 4  | 1  |
| 3 | 0 | 4 | 4  | 1  | 1  | 2  |
| 3 | 0 | 2 | 3  | 1  | 4  | 1  |
| 3 | 0 | 1 | 4  | 1  | 4  | 1  |
| 0 | 0 | 1 | 4  | 1  | 4  | 1  |
| 3 | 0 | 2 | 4  | 1  | 4  | 2  |
| 3 | 0 | 1 | 4  | 1  | 4  | 1  |
| 2 | 2 | 1 | 4  | 1  | 4  | 1  |
| 3 | 0 | 1 | 4  | 1  | 4  | 1  |
| 3 | 0 | 1 | 4  | 2  | 4  | 2  |
| 3 | 0 | 1 | 4  | 1  | 4  | 1  |
| 3 | 0 | 4 | 4  | 1  | 1  | 1  |
| 3 | 0 | 1 | 4  | 1  | 4  | 1  |

|        |        |   |   |   |   |   |
|--------|--------|---|---|---|---|---|
| 3      | 0      | 1 | 4 | 1 | 4 | 1 |
| 3      | 0      | 3 | 3 | 2 | 1 | 2 |
| 3      | 0      | 1 | 4 | 1 | 4 | 1 |
| 3      | 0      | 1 | 4 | 1 | 4 | 1 |
| 3      | 0      | 1 | 4 | 1 | 4 | 1 |
| 3      | 0      | 1 | 4 | 2 | 3 | 2 |
| 3      | 0      | 1 | 1 | 1 | 1 | 1 |
| 3      | 0      | 1 | 4 | 1 | 4 | 1 |
| 3      | 0      | 1 | 4 | 1 | 4 | 1 |
| 3      | 0      | 1 | 4 | 1 | 4 | 1 |
| 3      | 0      | 1 | 4 | 1 | 4 | 1 |
| 3      | 0      | 1 | 4 | 2 | 4 | 1 |
| 3      | 0      | 1 | 4 | 1 | 4 | 2 |
| 3      | 0      | 1 | 4 | 1 | 4 | 1 |
| 3      | 0      | 1 | 4 | 1 | 4 | 1 |
| 3      | 0      | 2 | 4 | 1 | 1 | 1 |
| 3      | 0      | 1 | 4 | 1 | 4 | 1 |
| 3      | 0      | 1 | 4 | 1 | 4 | 2 |
| 3      | 0      | 1 | 4 | 1 | 4 | 1 |
| 3      | 0      | 1 | 4 | 1 | 4 | 1 |
| 3      | 0      | 1 | 4 | 1 | 4 | 1 |
| 3      | 0      | 1 | 4 | 1 | 1 | 1 |
| 3      | 0      | 1 | 1 | 1 | 1 | 1 |
| 0      | 0      | 1 | 1 | 1 | 1 | 1 |
| 3      | 0      | 1 | 4 | 1 | 4 | 1 |
| 3      | 0      | 1 | 4 | 1 | 4 | 1 |
| 3      | 0      | 1 | 4 | 1 | 4 | 1 |
| 0      | 0      | 1 | 4 | 1 | 4 | 1 |
| 3      | 0      | 3 | 3 | 2 | 3 | 2 |
| #NULL! | #NULL! | 2 | 2 | 2 | 3 | 3 |
| 3      | 0      | 2 | 4 | 1 | 4 | 1 |
| 1      | 1      | 3 | 3 | 1 | 3 | 1 |
| 3      | 1      | 1 | 1 | 1 | 1 | 1 |
| 0      | 0      | 1 | 4 | 1 | 4 | 1 |
| 3      | 0      | 2 | 4 | 1 | 4 | 1 |
| 3      | 0      | 1 | 4 | 1 | 4 | 1 |
| 3      | 0      | 2 | 4 | 2 | 4 | 2 |
| 3      | 0      | 1 | 4 | 1 | 4 | 1 |
| 2      | 0      | 2 | 3 | 2 | 4 | 1 |
| 3      | 0      | 4 | 3 | 3 | 3 | 4 |
| 3      | 0      | 4 | 4 | 4 | 4 | 4 |
| 3      | 0      | 4 | 4 | 2 | 4 | 2 |
| 3      | 0      | 1 | 4 | 1 | 4 | 1 |
| 0      | 0      | 3 | 3 | 2 | 3 | 3 |
| 3      | 0      | 1 | 4 | 1 | 4 | 1 |
| 3      | 0      | 1 | 4 | 1 | 4 | 1 |
| 3      | 0      | 1 | 4 | 1 | 4 | 1 |
| 3      | 0      | 2 | 4 | 1 | 4 | 1 |

|        |        |        |        |        |        |        |
|--------|--------|--------|--------|--------|--------|--------|
| 2      | 2      | 1      | 4      | 1      | 4      | 1      |
| 3      | 0      | 1      | 4      | 1      | 4      | 1      |
| 3      | 0      | 2      | 3      | 2      | 3      | 2      |
| 3      | 0      | 1      | 4      | 1      | 4      | 1      |
| 0      | 0      | 2      | 4      | 1      | 4      | 2      |
| 3      | 0      | 1      | 4      | 1      | 4      | 1      |
| 2      | 2      | 1      | 4      | 1      | 4      | 1      |
| 0      | 0      | 3      | 1      | 1      | 1      | 1      |
| 3      | 0      | 4      | 4      | 4      | 4      | 3      |
| 3      | 0      | 2      | 4      | 1      | 4      | 4      |
| 0      | 0      | 2      | 2      | 2      | 2      | 2      |
| #NULL! | 2      | 4      | 4      | 4      | 4      | 4      |
| #NULL! | #NULL! | #NULL! | #NULL! | #NULL! | #NULL! | #NULL! |
| 3      | 0      | 2      | 4      | 1      | 4      | 1      |
| 2      | 2      | 2      | 1      | 1      | 1      | 2      |
| 3      | 0      | 1      | 4      | 1      | 4      | 1      |
| 3      | 0      | 1      | 4      | 1      | 4      | 1      |
| 0      | 0      | 1      | 4      | 1      | 4      | 3      |
| 3      | 0      | 1      | 4      | 1      | 4      | 1      |
| 3      | 0      | #NULL! | 3      | 2      | 4      | 3      |
| 3      | 0      | 3      | 3      | 2      | 3      | 2      |
| 0      | 0      | 2      | 4      | 1      | 4      | 3      |
| 2      | 2      | 2      | 2      | 2      | 2      | 2      |
| 0      | 0      | 2      | 3      | 2      | 3      | 2      |
| 2      | 2      | 1      | 4      | 1      | 4      | 1      |
| 2      | 0      | 1      | 4      | 1      | 4      | 1      |
| 3      | 0      | 1      | 4      | 1      | 4      | 1      |
| 3      | 0      | 2      | 4      | 2      | 2      | 1      |
| 0      | 0      | 2      | 2      | 2      | 2      | 2      |
| 2      | 2      | 4      | 4      | 4      | 4      | 2      |
| 3      | 0      | 1      | 1      | 1      | 1      | 1      |
| 0      | 0      | 1      | 4      | 1      | 4      | 1      |
| 2      | 0      | 1      | 4      | 1      | 4      | 1      |
| 2      | 2      | 1      | 4      | 1      | 4      | 1      |
| 3      | 0      | 4      | 4      | 1      | 1      | 1      |
| 0      | 0      | 1      | 4      | 1      | 1      | 1      |
| 3      | 0      | 1      | 1      | 1      | 1      | 1      |
| 0      | 0      | 4      | 4      | 2      | 4      | 2      |
| #NULL! | 0      | 4      | 4      | 2      | #NULL! | 2      |
| 2      | 2      | 2      | 4      | 1      | 4      | 2      |
| 3      | 0      | 2      | 4      | 1      | 3      | 1      |
| 3      | 0      | 4      | 4      | 1      | 4      | 1      |
| 3      | 0      | 4      | 4      | 2      | 4      | 2      |
| 3      | 0      | 2      | 3      | 2      | 3      | 2      |
| 3      | 0      | 2      | 3      | 2      | 3      | 2      |
| 3      | 0      | 1      | 4      | 1      | 4      | 1      |
| 3      | 0      | 1      | 4      | 1      | 4      | 1      |
| 3      | 0      | 4      | 1      | 4      | 2      | 1      |



|        |        |        |        |        |        |        |
|--------|--------|--------|--------|--------|--------|--------|
| 3      | 0      | 2      | 4      | 1      | 1      | 1      |
| 3      | 0      | 2      | 1      | 1      | 2      | 2      |
| 3      | 0      | 1      | 4      | 1      | 4      | 1      |
| 0      | 0      | 1      | 1      | 1      | 1      | 1      |
| 3      | 0      | 1      | 4      | 1      | 1      | 1      |
| 3      | 0      | 1      | 1      | 1      | 1      | 1      |
| 3      | 0      | 1      | 4      | 1      | 4      | 1      |
| 3      | 0      | 1      | 1      | 1      | 1      | 1      |
| 3      | 0      | 1      | 4      | 1      | 1      | 1      |
| 3      | 0      | 1      | 4      | 1      | 4      | 1      |
| 0      | 0      | 1      | 1      | 1      | 4      | 1      |
| 3      | 0      | 1      | 4      | 1      | 4      | 1      |
| 3      | 0      | 1      | 4      | 1      | 4      | 1      |
| 3      | 0      | 1      | 4      | 1      | 4      | 1      |
| 3      | 0      | 1      | 4      | 1      | 4      | 1      |
| 3      | 0      | 4      | 4      | 1      | 4      | 1      |
| #NULL! | #NULL! | #NULL! | #NULL! | #NULL! | #NULL! | #NULL! |
| 3      | 0      | 1      | 4      | 1      | 4      | 1      |
| 0      | 0      | 1      | 4      | 1      | 4      | 2      |
| 3      | 0      | 1      | 1      | 1      | 4      | 1      |
| 3      | 0      | 4      | 4      | 1      | 4      | 1      |

| abstaina_pre | abstainb_pre | abstainc_pre | abstaind_pre | abstaine_pre | prega_pre | pregb_pre | pregc_pre |
|--------------|--------------|--------------|--------------|--------------|-----------|-----------|-----------|
| 99           | 99           | 99           | 99           | 99           | 99        | 99        | 99        |
| 2            | 99           | 4            | 2            | 1            | 3         | 3         | 3         |
| 1            | 1            | 1            | 3            | 1            | 4         | 4         | 4         |
| 3            | 2            | 3            | 2            | 3            | 3         | 4         | 2         |
| 2            | 3            | 4            | 3            | 1            | 2         | 3         | 1         |
| 99           | 99           | 99           | 99           | 99           | 99        | 99        | 99        |
| 4            | 4            | 1            | 4            | 4            | 4         | 4         | 4         |
| 2            | 2            | 2            | 2            | 2            | 2         | 2         | 3         |
| 99           | 99           | 99           | 99           | 99           | 99        | 99        | 99        |
| 2            | 2            | 3            | 3            | 1            | 2         | 3         | 2         |
| 3            | 3            | 2            | 1            | 1            | 2         | 1         | 3         |
| 3            | 3            | 3            | 2            | 1            | 2         | 2         | 2         |
| 3            | 1            | 3            | 2            | 1            | 1         | 1         | 2         |
| 2            | 1            | 1            | 1            | 2            | 1         | 2         | 1         |
| 1            | 1            | 1            | 1            | 1            | 1         | 1         | 1         |
| 3            | 2            | 3            | 2            | 1            | 3         | 3         | 2         |
| 99           | 99           | 99           | 99           | 99           | 99        | 99        | 99        |
| 3            | 2            | 2            | 3            | 2            | 2         | 2         | 3         |
| 3            | 2            | 99           | 99           | 1            | 2         | 3         | 3         |
| 99           | 2            | 3            | 3            | 2            | 2         | 2         | 2         |
| 99           | 99           | 99           | 99           | 99           | 99        | 99        | 99        |
| 1            | 99           | 99           | 99           | 99           | 1         | 1         | 1         |
| 99           | 99           | 99           | 99           | 99           | 99        | 99        | 99        |
| 2            | 2            | 3            | 3            | 4            | 4         | 4         | 4         |
| 99           | 1            | 1            | 1            | 1            | 4         | 3         | 99        |
| 99           | 1            | 4            | 2            | 1            | 2         | 4         | 3         |
| 99           | 99           | 2            | 99           | 1            | 2         | 2         | 3         |
| 4            | 4            | 4            | 1            | 1            | 4         | 4         | 4         |
| 3            | 3            | 3            | 2            | 1            | 4         | 4         | 3         |
| 4            | 1            | 4            | 1            | 1            | 3         | 4         | 4         |
| 3            | 3            | 2            | 3            | 1            | 3         | 3         | 2         |
| 2            | 2            | 2            | 3            | 1            | 1         | 2         | 1         |
| 3            | 2            | 2            | 2            | 1            | 2         | 2         | 3         |
| 4            | 4            | 4            | 1            | 1            | 3         | 3         | 1         |
| 99           | 99           | 99           | 99           | 3            | 99        | 99        | 99        |
| 3            | 2            | 4            | 2            | 1            | 3         | 4         | 3         |
| 3            | 3            | 3            | 3            | 2            | 3         | 3         | 3         |
| 3            | 2            | 2            | 2            | 2            | 3         | 4         | 3         |
| 2            | 1            | 2            | 3            | 1            | 3         | 3         | 3         |
| 2            | 3            | 2            | 3            | 2            | 3         | 3         | 3         |
| 4            | 1            | 1            | 1            | 1            | 4         | 4         | 3         |
| 2            | 99           | 99           | 1            | 1            | 99        | 99        | 99        |
| 1            | 1            | 4            | 2            | 1            | 4         | 3         | 4         |
| 3            | 2            | 3            | 2            | 1            | 3         | 3         | 3         |
| 3            | 1            | 4            | 1            | 1            | 1         | 4         | 4         |
| 4            | 1            | 2            | 1            | 1            | 4         | 4         | 3         |
| 1            | 3            | 2            | 3            | 4            | 1         | 2         | 1         |

|    |    |    |    |    |    |    |   |
|----|----|----|----|----|----|----|---|
| 1  | 4  | 3  | 4  | 4  | 3  | 4  | 3 |
| 4  | 1  | 4  | 1  | 1  | 4  | 4  | 4 |
| 2  | 3  | 2  | 1  | 1  | 4  | 4  | 4 |
| 3  | 3  | 3  | 2  | 2  | 2  | 3  | 3 |
| 4  | 1  | 3  | 1  | 1  | 3  | 3  | 3 |
| 2  | 3  | 3  | 2  | 2  | 3  | 3  | 3 |
| 4  | 1  | 4  | 1  | 1  | 3  | 4  | 3 |
| 99 | 3  | 3  | 3  | 2  | 1  | 1  | 3 |
| 99 | 2  | 3  | 1  | 1  | 3  | 3  | 3 |
| 2  | 2  | 2  | 2  | 1  | 2  | 3  | 3 |
| 3  | 2  | 3  | 2  | 2  | 3  | 3  | 2 |
| 3  | 1  | 4  | 2  | 1  | 4  | 4  | 4 |
| 3  | 3  | 2  | 3  | 1  | 3  | 3  | 3 |
| 2  | 2  | 4  | 2  | 2  | 3  | 3  | 3 |
| 4  | 2  | 4  | 2  | 2  | 2  | 2  | 3 |
| 2  | 3  | 3  | 3  | 1  | 2  | 3  | 4 |
| 2  | 2  | 3  | 3  | 2  | 4  | 4  | 4 |
| 4  | 1  | 3  | 2  | 1  | 2  | 4  | 1 |
| 3  | 3  | 4  | 2  | 1  | 4  | 4  | 4 |
| 2  | 3  | 4  | 3  | 1  | 4  | 4  | 2 |
| 2  | 4  | 4  | 4  | 4  | 2  | 2  | 3 |
| 1  | 3  | 4  | 3  | 1  | 3  | 4  | 3 |
| 3  | 2  | 3  | 2  | 2  | 4  | 4  | 4 |
| 1  | 4  | 1  | 4  | 3  | 1  | 1  | 1 |
| 4  | 1  | 4  | 1  | 1  | 4  | 4  | 4 |
| 1  | 1  | 4  | 1  | 1  | 4  | 4  | 4 |
| 1  | 4  | 4  | 4  | 1  | 1  | 1  | 4 |
| 2  | 99 | 99 | 3  | 2  | 2  | 3  | 3 |
| 3  | 2  | 3  | 2  | 2  | 99 | 99 | 3 |
| 3  | 2  | 4  | 3  | 2  | 2  | 2  | 3 |
| 3  | 2  | 4  | 2  | 4  | 99 | 99 | 3 |
| 3  | 2  | 3  | 2  | 2  | 3  | 3  | 2 |
| 2  | 2  | 4  | 1  | 1  | 3  | 3  | 4 |
| 2  | 2  | 3  | 2  | 2  | 4  | 4  | 4 |
| 3  | 2  | 3  | 3  | 1  | 3  | 2  | 4 |
| 4  | 1  | 4  | 1  | 1  | 4  | 4  | 3 |
| 1  | 1  | 4  | 1  | 4  | 99 | 99 | 4 |
| 3  | 1  | 4  | 2  | 1  | 4  | 4  | 4 |
| 2  | 2  | 3  | 2  | 2  | 1  | 1  | 3 |
| 4  | 1  | 4  | 1  | 1  | 4  | 4  | 4 |
| 4  | 2  | 3  | 2  | 2  | 4  | 3  | 3 |
| 4  | 4  | 2  | 4  | 4  | 3  | 4  | 4 |
| 2  | 3  | 3  | 3  | 3  | 4  | 4  | 2 |
| 3  | 2  | 2  | 2  | 2  | 3  | 3  | 3 |
| 3  | 2  | 3  | 2  | 2  | 2  | 2  | 3 |
| 3  | 1  | 4  | 1  | 1  | 4  | 4  | 4 |
| 4  | 1  | 4  | 1  | 1  | 4  | 4  | 4 |
| 99 | 99 | 3  | 99 | 99 | 2  | 1  | 3 |

|    |    |    |    |    |   |   |    |
|----|----|----|----|----|---|---|----|
| 4  | 3  | 3  | 1  | 1  | 3 | 3 | 2  |
| 2  | 1  | 3  | 2  | 2  | 3 | 3 | 4  |
| 2  | 3  | 3  | 3  | 3  | 1 | 1 | 3  |
| 3  | 1  | 4  | 1  | 1  | 4 | 4 | 4  |
| 1  | 99 | 2  | 2  | 1  | 3 | 3 | 3  |
| 4  | 2  | 3  | 2  | 1  | 4 | 4 | 3  |
| 3  | 2  | 4  | 1  | 2  | 3 | 2 | 4  |
| 3  | 2  | 3  | 2  | 1  | 4 | 4 | 3  |
| 2  | 2  | 3  | 3  | 2  | 2 | 3 | 3  |
| 2  | 3  | 3  | 2  | 2  | 3 | 3 | 4  |
| 2  | 2  | 3  | 2  | 2  | 3 | 2 | 3  |
| 99 | 2  | 2  | 2  | 2  | 2 | 3 | 3  |
| 4  | 2  | 3  | 1  | 1  | 4 | 4 | 4  |
| 2  | 3  | 3  | 3  | 1  | 2 | 3 | 3  |
| 3  | 2  | 2  | 2  | 2  | 3 | 3 | 2  |
| 2  | 1  | 4  | 2  | 2  | 4 | 4 | 4  |
| 4  | 2  | 4  | 1  | 1  | 2 | 2 | 1  |
| 4  | 1  | 4  | 1  | 1  | 4 | 4 | 4  |
| 3  | 2  | 99 | 2  | 2  | 3 | 3 | 3  |
| 3  | 3  | 3  | 4  | 2  | 3 | 4 | 4  |
| 3  | 3  | 3  | 3  | 2  | 2 | 2 | 3  |
| 4  | 1  | 4  | 1  | 1  | 4 | 4 | 4  |
| 4  | 4  | 4  | 4  | 4  | 4 | 4 | 4  |
| 99 | 3  | 4  | 2  | 1  | 3 | 4 | 4  |
| 1  | 1  | 4  | 1  | 1  | 4 | 4 | 1  |
| 1  | 4  | 1  | 4  | 4  | 4 | 4 | 4  |
| 4  | 1  | 4  | 1  | 1  | 4 | 4 | 4  |
| 3  | 2  | 3  | 2  | 2  | 3 | 3 | 3  |
| 3  | 3  | 2  | 3  | 3  | 2 | 3 | 3  |
| 3  | 3  | 4  | 2  | 1  | 2 | 3 | 2  |
| 99 | 99 | 99 | 3  | 2  | 4 | 4 | 4  |
| 2  | 2  | 2  | 2  | 2  | 2 | 2 | 2  |
| 2  | 3  | 2  | 2  | 2  | 4 | 4 | 4  |
| 3  | 2  | 4  | 2  | 1  | 4 | 4 | 4  |
| 3  | 3  | 4  | 3  | 1  | 3 | 3 | 2  |
| 2  | 1  | 4  | 1  | 1  | 3 | 4 | 4  |
| 3  | 2  | 3  | 2  | 1  | 2 | 3 | 2  |
| 3  | 2  | 4  | 2  | 2  | 2 | 2 | 3  |
| 3  | 2  | 3  | 2  | 1  | 3 | 3 | 4  |
| 3  | 3  | 4  | 3  | 1  | 3 | 4 | 3  |
| 3  | 1  | 4  | 2  | 1  | 3 | 4 | 3  |
| 2  | 2  | 3  | 2  | 2  | 3 | 3 | 3  |
| 3  | 2  | 4  | 2  | 1  | 3 | 3 | 3  |
| 4  | 1  | 4  | 1  | 1  | 2 | 3 | 4  |
| 2  | 2  | 3  | 2  | 2  | 2 | 2 | 99 |
| 99 | 99 | 99 | 99 | 99 | 4 | 1 | 4  |
| 3  | 2  | 3  | 3  | 2  | 3 | 2 | 3  |
| 2  | 3  | 3  | 2  | 1  | 3 | 2 | 4  |

|    |    |    |    |    |    |    |    |
|----|----|----|----|----|----|----|----|
| 2  | 2  | 4  | 2  | 2  | 2  | 2  | 3  |
| 2  | 3  | 3  | 3  | 2  | 1  | 2  | 3  |
| 4  | 1  | 1  | 1  | 1  | 4  | 1  | 4  |
| 4  | 1  | 4  | 1  | 1  | 4  | 4  | 4  |
| 2  | 3  | 3  | 3  | 2  | 2  | 2  | 2  |
| 2  | 2  | 2  | 2  | 1  | 2  | 3  | 2  |
| 2  | 2  | 2  | 2  | 2  | 2  | 2  | 2  |
| 3  | 3  | 3  | 2  | 1  | 2  | 2  | 3  |
| 2  | 3  | 2  | 3  | 1  | 3  | 3  | 3  |
| 1  | 3  | 1  | 4  | 4  | 3  | 3  | 2  |
| 3  | 1  | 3  | 2  | 1  | 3  | 3  | 3  |
| 1  | 1  | 1  | 1  | 1  | 1  | 1  | 1  |
| 2  | 3  | 3  | 2  | 2  | 3  | 2  | 3  |
| 2  | 2  | 3  | 1  | 2  | 3  | 2  | 3  |
| 4  | 3  | 3  | 1  | 1  | 4  | 3  | 2  |
| 2  | 3  | 2  | 2  | 2  | 4  | 3  | 2  |
| 3  | 2  | 3  | 2  | 1  | 3  | 3  | 2  |
| 4  | 3  | 3  | 1  | 1  | 3  | 4  | 3  |
| 4  | 3  | 4  | 1  | 1  | 4  | 4  | 4  |
| 3  | 2  | 3  | 2  | 2  | 2  | 2  | 3  |
| 3  | 2  | 4  | 2  | 4  | 3  | 2  | 3  |
| 4  | 99 | 99 | 2  | 1  | 99 | 3  | 99 |
| 4  | 1  | 4  | 2  | 1  | 1  | 4  | 1  |
| 3  | 1  | 4  | 1  | 1  | 3  | 4  | 4  |
| 3  | 1  | 1  | 2  | 1  | 3  | 3  | 3  |
| 3  | 2  | 3  | 2  | 1  | 4  | 4  | 4  |
| 3  | 2  | 3  | 2  | 2  | 3  | 3  | 3  |
| 2  | 3  | 3  | 4  | 3  | 2  | 2  | 3  |
| 3  | 1  | 4  | 1  | 1  | 3  | 3  | 4  |
| 4  | 4  | 4  | 2  | 1  | 4  | 4  | 4  |
| 99 | 99 | 99 | 99 | 99 | 99 | 99 | 99 |
| 3  | 2  | 3  | 2  | 1  | 2  | 3  | 3  |
| 3  | 2  | 3  | 2  | 1  | 3  | 3  | 3  |
| 4  | 2  | 3  | 1  | 1  | 3  | 4  | 3  |
| 4  | 1  | 4  | 1  | 1  | 4  | 4  | 4  |
| 3  | 4  | 4  | 3  | 1  | 2  | 2  | 3  |
| 4  | 1  | 4  | 2  | 1  | 3  | 3  | 4  |
| 2  | 2  | 2  | 3  | 2  | 2  | 2  | 2  |
| 3  | 4  | 4  | 3  | 1  | 4  | 4  | 4  |
| 1  | 2  | 3  | 2  | 1  | 3  | 3  | 3  |
| 3  | 1  | 4  | 1  | 1  | 3  | 2  | 2  |
| 99 | 99 | 3  | 2  | 2  | 4  | 4  | 3  |
| 1  | 3  | 3  | 3  | 1  | 4  | 4  | 4  |
| 2  | 2  | 4  | 2  | 4  | 4  | 4  | 4  |
| 3  | 2  | 3  | 2  | 1  | 2  | 2  | 3  |
| 4  | 1  | 4  | 1  | 1  | 4  | 4  | 4  |
| 3  | 3  | 4  | 2  | 1  | 2  | 3  | 3  |
| 3  | 2  | 4  | 1  | 1  | 4  | 4  | 4  |

|    |    |    |    |    |    |    |    |
|----|----|----|----|----|----|----|----|
| 99 | 1  | 4  | 1  | 1  | 4  | 4  | 4  |
| 3  | 2  | 4  | 1  | 1  | 4  | 3  | 2  |
| 4  | 1  | 1  | 3  | 1  | 4  | 4  | 4  |
| 3  | 2  | 2  | 2  | 1  | 4  | 4  | 4  |
| 3  | 3  | 2  | 2  | 2  | 3  | 3  | 4  |
| 2  | 3  | 99 | 99 | 99 | 4  | 4  | 4  |
| 1  | 3  | 3  | 2  | 2  | 3  | 3  | 3  |
| 2  | 2  | 4  | 1  | 1  | 4  | 4  | 4  |
| 3  | 3  | 3  | 3  | 3  | 3  | 3  | 3  |
| 2  | 1  | 4  | 1  | 1  | 4  | 2  | 3  |
| 3  | 2  | 4  | 1  | 1  | 3  | 3  | 3  |
| 2  | 2  | 3  | 2  | 2  | 2  | 2  | 3  |
| 4  | 1  | 4  | 1  | 1  | 4  | 4  | 4  |
| 2  | 3  | 3  | 3  | 2  | 3  | 3  | 3  |
| 1  | 1  | 4  | 1  | 1  | 1  | 1  | 1  |
| 2  | 2  | 3  | 3  | 1  | 1  | 1  | 3  |
| 3  | 2  | 4  | 1  | 1  | 2  | 4  | 4  |
| 2  | 2  | 4  | 2  | 2  | 2  | 2  | 4  |
| 3  | 1  | 3  | 2  | 1  | 3  | 4  | 4  |
| 2  | 3  | 1  | 1  | 1  | 2  | 3  | 2  |
| 4  | 1  | 4  | 1  | 1  | 4  | 4  | 4  |
| 99 | 99 | 99 | 99 | 99 | 99 | 99 | 99 |
| 3  | 2  | 2  | 3  | 1  | 2  | 2  | 2  |
| 4  | 2  | 4  | 1  | 1  | 2  | 1  | 2  |
| 1  | 99 | 2  | 99 | 4  | 3  | 4  | 3  |
| 4  | 3  | 4  | 2  | 1  | 4  | 4  | 4  |
| 2  | 1  | 4  | 2  | 1  | 4  | 4  | 4  |
| 3  | 2  | 4  | 2  | 1  | 3  | 4  | 4  |
| 4  | 1  | 4  | 1  | 1  | 4  | 4  | 4  |
| 3  | 3  | 4  | 3  | 1  | 3  | 1  | 4  |
| 4  | 1  | 4  | 1  | 1  | 2  | 2  | 3  |
| 3  | 2  | 3  | 2  | 1  | 3  | 3  | 3  |
| 4  | 1  | 4  | 1  | 4  | 4  | 4  | 4  |
| 2  | 1  | 4  | 1  | 1  | 99 | 99 | 99 |
| 2  | 2  | 3  | 2  | 3  | 4  | 4  | 4  |
| 1  | 3  | 4  | 3  | 4  | 2  | 1  | 3  |
| 3  | 2  | 4  | 2  | 1  | 2  | 2  | 3  |
| 3  | 3  | 3  | 2  | 2  | 3  | 3  | 3  |
| 3  | 3  | 2  | 3  | 2  | 4  | 4  | 4  |
| 4  | 1  | 4  | 1  | 1  | 2  | 3  | 4  |
| 3  | 2  | 4  | 2  | 2  | 4  | 4  | 4  |
| 2  | 2  | 3  | 2  | 2  | 4  | 4  | 4  |
| 3  | 2  | 4  | 1  | 1  | 2  | 2  | 3  |
| 3  | 2  | 3  | 2  | 1  | 3  | 3  | 3  |
| 4  | 2  | 4  | 2  | 1  | 4  | 4  | 3  |
| 1  | 4  | 4  | 3  | 2  | 3  | 2  | 3  |
| 4  | 1  | 4  | 1  | 1  | 3  | 3  | 2  |
| 4  | 3  | 4  | 1  | 4  | 1  | 4  | 4  |

|    |   |    |   |   |    |    |    |
|----|---|----|---|---|----|----|----|
| 3  | 3 | 3  | 2 | 2 | 2  | 2  | 2  |
| 4  | 1 | 4  | 1 | 1 | 4  | 4  | 3  |
| 3  | 2 | 4  | 1 | 1 | 2  | 3  | 2  |
| 4  | 1 | 1  | 1 | 1 | 4  | 4  | 4  |
| 1  | 3 | 2  | 3 | 2 | 1  | 3  | 2  |
| 4  | 1 | 4  | 2 | 4 | 4  | 4  | 1  |
| 3  | 1 | 4  | 1 | 1 | 4  | 3  | 4  |
| 3  | 3 | 3  | 3 | 3 | 3  | 3  | 3  |
| 3  | 2 | 3  | 2 | 2 | 3  | 2  | 3  |
| 4  | 2 | 2  | 1 | 1 | 3  | 3  | 3  |
| 99 | 3 | 3  | 3 | 1 | 4  | 4  | 4  |
| 99 | 2 | 2  | 2 | 2 | 2  | 3  | 3  |
| 3  | 2 | 3  | 2 | 1 | 4  | 4  | 3  |
| 2  | 3 | 3  | 3 | 3 | 4  | 4  | 2  |
| 4  | 4 | 4  | 2 | 4 | 4  | 4  | 4  |
| 3  | 2 | 4  | 1 | 1 | 4  | 4  | 4  |
| 4  | 1 | 4  | 1 | 1 | 4  | 4  | 2  |
| 4  | 1 | 99 | 1 | 1 | 99 | 99 | 99 |
| 99 | 2 | 3  | 2 | 1 | 99 | 2  | 2  |
| 3  | 1 | 4  | 2 | 1 | 4  | 4  | 4  |
| 3  | 3 | 3  | 2 | 1 | 3  | 4  | 4  |
| 2  | 3 | 2  | 3 | 1 | 4  | 4  | 4  |
| 3  | 3 | 4  | 2 | 1 | 3  | 3  | 3  |
| 4  | 1 | 99 | 1 | 1 | 4  | 4  | 1  |
| 3  | 1 | 4  | 1 | 1 | 4  | 4  | 2  |
| 3  | 2 | 3  | 1 | 1 | 2  | 2  | 3  |
| 4  | 2 | 4  | 1 | 1 | 4  | 4  | 4  |
| 4  | 2 | 4  | 2 | 1 | 4  | 4  | 3  |
| 3  | 3 | 4  | 3 | 2 | 3  | 4  | 3  |
| 4  | 1 | 4  | 1 | 1 | 4  | 4  | 1  |
| 4  | 3 | 1  | 1 | 1 | 3  | 3  | 3  |
| 3  | 3 | 3  | 3 | 2 | 3  | 3  | 2  |
| 2  | 3 | 3  | 3 | 2 | 4  | 4  | 3  |
| 3  | 2 | 3  | 2 | 2 | 3  | 4  | 3  |
| 2  | 2 | 2  | 3 | 1 | 1  | 1  | 1  |
| 2  | 4 | 3  | 4 | 4 | 2  | 4  | 3  |
| 4  | 2 | 3  | 2 | 2 | 3  | 3  | 3  |
| 2  | 3 | 1  | 3 | 3 | 3  | 3  | 3  |
| 1  | 1 | 4  | 2 | 1 | 3  | 3  | 2  |
| 4  | 3 | 4  | 4 | 2 | 4  | 4  | 4  |
| 2  | 3 | 4  | 2 | 1 | 3  | 3  | 3  |
| 4  | 1 | 4  | 1 | 1 | 3  | 3  | 3  |
| 3  | 3 | 4  | 2 | 1 | 3  | 3  | 4  |
| 4  | 4 | 4  | 2 | 2 | 2  | 3  | 3  |
| 1  | 1 | 4  | 1 | 1 | 4  | 4  | 2  |
| 3  | 2 | 3  | 1 | 2 | 4  | 4  | 2  |
| 2  | 2 | 3  | 2 | 1 | 4  | 4  | 4  |
| 1  | 4 | 3  | 4 | 1 | 1  | 3  | 3  |

|    |    |    |    |    |    |    |    |
|----|----|----|----|----|----|----|----|
| 3  | 3  | 3  | 3  | 3  | 3  | 3  | 2  |
| 4  | 1  | 4  | 1  | 1  | 1  | 2  | 1  |
| 4  | 2  | 3  | 2  | 1  | 3  | 4  | 3  |
| 4  | 2  | 99 | 2  | 2  | 99 | 1  | 1  |
| 4  | 1  | 4  | 1  | 1  | 2  | 1  | 3  |
| 3  | 3  | 2  | 2  | 2  | 3  | 3  | 3  |
| 3  | 3  | 3  | 3  | 2  | 4  | 4  | 3  |
| 4  | 2  | 3  | 2  | 1  | 3  | 3  | 2  |
| 2  | 3  | 3  | 1  | 1  | 3  | 4  | 4  |
| 2  | 2  | 3  | 2  | 2  | 3  | 3  | 3  |
| 2  | 2  | 4  | 2  | 1  | 4  | 4  | 3  |
| 3  | 3  | 3  | 3  | 2  | 2  | 2  | 2  |
| 3  | 2  | 3  | 3  | 1  | 3  | 3  | 2  |
| 3  | 2  | 3  | 2  | 1  | 3  | 4  | 3  |
| 2  | 3  | 3  | 3  | 3  | 2  | 2  | 3  |
| 4  | 1  | 3  | 1  | 1  | 4  | 4  | 3  |
| 2  | 3  | 3  | 3  | 3  | 2  | 2  | 3  |
| 2  | 3  | 4  | 2  | 1  | 2  | 2  | 3  |
| 4  | 1  | 4  | 4  | 1  | 4  | 4  | 4  |
| 4  | 1  | 4  | 1  | 1  | 3  | 3  | 4  |
| 4  | 1  | 4  | 1  | 1  | 3  | 3  | 4  |
| 1  | 3  | 4  | 4  | 3  | 3  | 1  | 3  |
| 2  | 3  | 3  | 3  | 2  | 4  | 4  | 3  |
| 2  | 3  | 3  | 3  | 2  | 2  | 2  | 3  |
| 1  | 3  | 2  | 3  | 2  | 2  | 2  | 2  |
| 3  | 2  | 3  | 2  | 2  | 3  | 3  | 3  |
| 3  | 3  | 2  | 2  | 2  | 3  | 3  | 3  |
| 3  | 2  | 3  | 2  | 2  | 2  | 3  | 3  |
| 4  | 1  | 99 | 99 | 99 | 99 | 99 | 99 |
| 99 | 99 | 99 | 99 | 99 | 99 | 99 | 99 |
| 4  | 2  | 4  | 2  | 1  | 4  | 4  | 3  |
| 2  | 1  | 4  | 3  | 2  | 3  | 2  | 99 |
| 2  | 3  | 3  | 3  | 3  | 4  | 4  | 4  |
| 2  | 3  | 3  | 2  | 2  | 2  | 2  | 2  |
| 4  | 2  | 4  | 1  | 1  | 3  | 3  | 1  |
| 1  | 3  | 2  | 2  | 3  | 4  | 1  | 4  |
| 3  | 3  | 2  | 2  | 2  | 2  | 2  | 2  |
| 3  | 1  | 3  | 2  | 1  | 3  | 3  | 3  |
| 1  | 1  | 1  | 1  | 1  | 4  | 4  | 4  |
| 4  | 1  | 1  | 1  | 1  | 3  | 4  | 2  |
| 3  | 3  | 3  | 2  | 2  | 4  | 4  | 4  |
| 2  | 3  | 3  | 3  | 2  | 3  | 2  | 3  |
| 2  | 3  | 2  | 3  | 3  | 3  | 2  | 3  |
| 3  | 1  | 4  | 2  | 1  | 3  | 3  | 4  |
| 2  | 3  | 3  | 3  | 2  | 2  | 2  | 3  |
| 4  | 3  | 4  | 2  | 1  | 3  | 3  | 4  |
| 2  | 2  | 3  | 4  | 1  | 2  | 2  | 3  |
| 2  | 2  | 3  | 3  | 3  | 3  | 2  | 4  |



|    |    |    |    |    |    |    |    |
|----|----|----|----|----|----|----|----|
| 3  | 3  | 4  | 3  | 2  | 2  | 3  | 4  |
| 3  | 3  | 2  | 3  | 2  | 3  | 3  | 2  |
| 3  | 2  | 3  | 99 | 2  | 99 | 99 | 3  |
| 2  | 2  | 2  | 3  | 3  | 3  | 3  | 4  |
| 3  | 3  | 3  | 3  | 2  | 4  | 3  | 2  |
| 99 | 99 | 99 | 99 | 99 | 99 | 99 | 99 |
| 3  | 2  | 3  | 3  | 2  | 4  | 3  | 3  |
| 2  | 2  | 3  | 3  | 3  | 4  | 4  | 3  |
| 1  | 3  | 3  | 2  | 3  | 2  | 3  | 3  |
| 2  | 4  | 2  | 3  | 4  | 3  | 3  | 4  |
| 1  | 3  | 4  | 3  | 3  | 2  | 3  | 3  |
| 1  | 1  | 1  | 1  | 1  | 4  | 4  | 4  |
| 2  | 2  | 3  | 2  | 3  | 3  | 2  | 2  |
| 3  | 2  | 3  | 2  | 2  | 2  | 3  | 3  |
| 2  | 1  | 4  | 2  | 1  | 4  | 4  | 4  |
| 3  | 2  | 3  | 2  | 1  | 3  | 3  | 3  |
| 4  | 1  | 4  | 3  | 1  | 4  | 4  | 4  |
| 2  | 2  | 2  | 2  | 2  | 3  | 3  | 2  |
| 3  | 1  | 4  | 2  | 2  | 3  | 3  | 3  |
| 3  | 2  | 3  | 99 | 1  | 2  | 2  | 2  |
| 4  | 1  | 99 | 1  | 1  | 2  | 3  | 3  |
| 3  | 1  | 4  | 1  | 1  | 2  | 3  | 2  |
| 2  | 3  | 3  | 2  | 2  | 3  | 3  | 3  |
| 3  | 2  | 3  | 2  | 1  | 4  | 3  | 4  |
| 3  | 3  | 3  | 2  | 1  | 3  | 3  | 4  |
| 3  | 3  | 3  | 3  | 1  | 4  | 4  | 4  |
| 2  | 1  | 4  | 1  | 1  | 4  | 4  | 4  |
| 99 | 99 | 99 | 99 | 99 | 99 | 99 | 99 |
| 3  | 1  | 3  | 2  | 1  | 3  | 3  | 3  |
| 1  | 1  | 1  | 1  | 1  | 3  | 3  | 3  |
| 4  | 2  | 3  | 1  | 1  | 3  | 3  | 3  |
| 4  | 1  | 4  | 1  | 1  | 4  | 4  | 4  |
| 4  | 2  | 4  | 2  | 1  | 4  | 4  | 4  |
| 2  | 1  | 1  | 1  | 1  | 4  | 4  | 3  |
| 3  | 1  | 3  | 1  | 1  | 4  | 4  | 4  |
| 99 | 99 | 99 | 99 | 1  | 3  | 4  | 3  |
| 4  | 3  | 3  | 2  | 1  | 4  | 4  | 4  |
| 1  | 3  | 2  | 3  | 2  | 3  | 2  | 4  |
| 3  | 2  | 2  | 2  | 1  | 4  | 4  | 3  |
| 99 | 99 | 3  | 3  | 99 | 99 | 99 | 2  |
| 2  | 99 | 3  | 99 | 3  | 2  | 3  | 4  |
| 2  | 3  | 4  | 1  | 1  | 3  | 4  | 3  |
| 3  | 3  | 3  | 3  | 2  | 3  | 4  | 2  |
| 3  | 2  | 3  | 2  | 2  | 4  | 2  | 3  |
| 4  | 1  | 4  | 1  | 1  | 4  | 4  | 4  |
| 4  | 1  | 1  | 1  | 1  | 4  | 4  | 4  |
| 2  | 3  | 4  | 4  | 2  | 4  | 4  | 3  |
| 4  | 3  | 4  | 1  | 1  | 4  | 4  | 4  |

|    |    |    |    |    |    |    |    |
|----|----|----|----|----|----|----|----|
| 99 | 2  | 3  | 2  | 1  | 99 | 3  | 3  |
| 4  | 2  | 4  | 1  | 1  | 4  | 4  | 3  |
| 4  | 2  | 3  | 2  | 1  | 3  | 3  | 2  |
| 2  | 2  | 3  | 99 | 1  | 3  | 4  | 4  |
| 4  | 1  | 4  | 1  | 1  | 1  | 1  | 1  |
| 2  | 3  | 3  | 3  | 2  | 3  | 4  | 4  |
| 3  | 2  | 3  | 2  | 1  | 3  | 2  | 4  |
| 3  | 3  | 3  | 2  | 2  | 4  | 4  | 4  |
| 3  | 2  | 3  | 2  | 2  | 3  | 3  | 3  |
| 1  | 2  | 4  | 2  | 1  | 4  | 4  | 3  |
| 99 | 99 | 99 | 99 | 99 | 4  | 4  | 4  |
| 3  | 1  | 3  | 2  | 1  | 4  | 4  | 4  |
| 3  | 2  | 3  | 2  | 2  | 3  | 3  | 3  |
| 3  | 2  | 3  | 2  | 2  | 3  | 3  | 3  |
| 2  | 2  | 3  | 1  | 2  | 3  | 3  | 4  |
| 4  | 4  | 4  | 4  | 4  | 4  | 4  | 4  |
| 2  | 3  | 3  | 2  | 2  | 3  | 2  | 3  |
| 2  | 4  | 4  | 3  | 2  | 4  | 4  | 4  |
| 3  | 2  | 3  | 2  | 2  | 2  | 2  | 3  |
| 4  | 4  | 4  | 4  | 1  | 3  | 2  | 2  |
| 2  | 4  | 1  | 4  | 3  | 4  | 4  | 4  |
| 2  | 2  | 2  | 3  | 2  | 2  | 2  | 3  |
| 3  | 3  | 2  | 3  | 2  | 3  | 2  | 3  |
| 99 | 99 | 99 | 2  | 2  | 4  | 4  | 3  |
| 2  | 3  | 3  | 3  | 2  | 4  | 4  | 4  |
| 2  | 3  | 3  | 3  | 1  | 4  | 4  | 4  |
| 2  | 2  | 3  | 2  | 2  | 3  | 4  | 3  |
| 2  | 1  | 4  | 2  | 2  | 1  | 1  | 2  |
| 99 | 99 | 99 | 99 | 99 | 99 | 99 | 99 |
| 2  | 4  | 3  | 3  | 3  | 2  | 2  | 2  |
| 2  | 3  | 3  | 3  | 2  | 3  | 3  | 3  |
| 4  | 1  | 4  | 2  | 1  | 3  | 3  | 4  |
| 99 | 99 | 99 | 99 | 99 | 99 | 99 | 99 |
| 3  | 2  | 3  | 2  | 2  | 2  | 2  | 99 |
| 3  | 1  | 3  | 3  | 1  | 1  | 1  | 1  |
| 4  | 1  | 4  | 1  | 1  | 4  | 4  | 4  |
| 1  | 3  | 4  | 4  | 2  | 3  | 4  | 4  |
| 1  | 3  | 2  | 99 | 1  | 4  | 4  | 4  |
| 4  | 2  | 4  | 2  | 2  | 4  | 4  | 4  |
| 3  | 1  | 4  | 1  | 1  | 3  | 3  | 4  |
| 3  | 2  | 1  | 1  | 1  | 3  | 3  | 4  |
| 1  | 3  | 2  | 2  | 2  | 4  | 3  | 4  |
| 2  | 3  | 3  | 3  | 2  | 3  | 3  | 3  |
| 99 | 99 | 99 | 99 | 99 | 99 | 99 | 99 |
| 2  | 2  | 3  | 2  | 1  | 4  | 4  | 4  |
| 3  | 2  | 3  | 2  | 2  | 3  | 3  | 4  |
| 2  | 3  | 3  | 2  | 2  | 2  | 4  | 3  |
| 2  | 2  | 2  | 3  | 3  | 2  | 3  | 4  |

|   |    |    |   |   |   |   |   |
|---|----|----|---|---|---|---|---|
| 4 | 2  | 3  | 2 | 1 | 4 | 4 | 4 |
| 4 | 1  | 4  | 1 | 1 | 3 | 4 | 4 |
| 4 | 1  | 4  | 1 | 1 | 4 | 4 | 3 |
| 2 | 99 | 99 | 1 | 1 | 4 | 4 | 1 |
| 2 | 2  | 3  | 2 | 2 | 4 | 4 | 3 |
| 3 | 1  | 1  | 1 | 1 | 3 | 3 | 4 |
| 1 | 2  | 3  | 3 | 3 | 4 | 3 | 4 |
| 3 | 3  | 3  | 2 | 2 | 3 | 4 | 4 |
| 2 | 3  | 3  | 2 | 3 | 3 | 2 | 3 |
| 3 | 3  | 4  | 3 | 1 | 4 | 2 | 4 |
| 3 | 3  | 3  | 2 | 2 | 3 | 3 | 3 |
| 2 | 3  | 3  | 3 | 3 | 3 | 3 | 3 |
| 3 | 2  | 3  | 2 | 2 | 2 | 4 | 4 |
| 3 | 2  | 3  | 2 | 1 | 2 | 2 | 3 |
| 2 | 2  | 3  | 2 | 2 | 3 | 3 | 3 |
| 4 | 1  | 4  | 1 | 1 | 4 | 4 | 4 |
| 4 | 1  | 4  | 4 | 1 | 4 | 4 | 4 |
| 4 | 1  | 1  | 1 | 1 | 4 | 4 | 1 |
| 3 | 2  | 4  | 2 | 1 | 4 | 4 | 4 |
| 2 | 2  | 3  | 2 | 1 | 3 | 2 | 3 |
| 1 | 1  | 4  | 1 | 1 | 3 | 3 | 2 |
| 2 | 2  | 4  | 2 | 2 | 4 | 4 | 4 |
| 3 | 2  | 4  | 2 | 2 | 4 | 4 | 4 |
| 3 | 3  | 2  | 3 | 3 | 2 | 3 | 3 |
| 2 | 3  | 4  | 3 | 3 | 4 | 4 | 4 |
| 2 | 3  | 2  | 3 | 2 | 4 | 4 | 3 |
| 2 | 2  | 3  | 3 | 3 | 1 | 1 | 1 |
| 3 | 1  | 4  | 2 | 1 | 4 | 4 | 4 |
| 3 | 2  | 3  | 2 | 2 | 3 | 3 | 3 |
| 2 | 3  | 3  | 3 | 3 | 3 | 3 | 3 |
| 3 | 2  | 3  | 2 | 1 | 4 | 4 | 4 |
| 2 | 2  | 2  | 2 | 3 | 3 | 3 | 4 |
| 3 | 2  | 4  | 1 | 1 | 3 | 2 | 2 |
| 3 | 1  | 4  | 1 | 1 | 4 | 4 | 4 |
| 4 | 2  | 4  | 1 | 1 | 4 | 4 | 3 |
| 3 | 3  | 2  | 1 | 3 | 4 | 3 | 3 |
| 2 | 2  | 3  | 2 | 1 | 3 | 2 | 3 |
| 3 | 1  | 3  | 1 | 1 | 3 | 3 | 2 |
| 3 | 3  | 3  | 2 | 2 | 2 | 3 | 2 |
| 2 | 3  | 2  | 4 | 3 | 3 | 3 | 4 |
| 3 | 2  | 4  | 2 | 1 | 4 | 4 | 4 |
| 4 | 3  | 1  | 1 | 1 | 2 | 1 | 2 |
| 3 | 2  | 2  | 1 | 1 | 3 | 4 | 3 |
| 2 | 3  | 2  | 3 | 2 | 2 | 2 | 2 |
| 2 | 3  | 3  | 3 | 1 | 3 | 4 | 3 |
| 4 | 3  | 3  | 2 | 3 | 4 | 4 | 3 |
| 3 | 2  | 3  | 2 | 2 | 3 | 2 | 3 |
| 4 | 4  | 4  | 4 | 1 | 4 | 4 | 4 |

|    |    |    |    |    |    |    |    |
|----|----|----|----|----|----|----|----|
| 4  | 3  | 4  | 2  | 1  | 4  | 4  | 3  |
| 3  | 3  | 3  | 3  | 2  | 3  | 2  | 3  |
| 2  | 1  | 3  | 1  | 1  | 4  | 4  | 3  |
| 3  | 2  | 3  | 2  | 1  | 99 | 99 | 99 |
| 3  | 3  | 3  | 3  | 2  | 2  | 3  | 3  |
| 2  | 2  | 3  | 2  | 1  | 4  | 4  | 4  |
| 4  | 1  | 4  | 1  | 1  | 99 | 99 | 99 |
| 4  | 3  | 2  | 2  | 1  | 4  | 4  | 3  |
| 1  | 3  | 3  | 3  | 3  | 4  | 4  | 4  |
| 1  | 3  | 4  | 4  | 4  | 2  | 2  | 2  |
| 4  | 1  | 4  | 1  | 1  | 3  | 4  | 3  |
| 2  | 2  | 4  | 4  | 4  | 4  | 4  | 4  |
| 3  | 2  | 3  | 2  | 1  | 4  | 4  | 2  |
| 2  | 2  | 3  | 2  | 1  | 3  | 4  | 3  |
| 4  | 4  | 4  | 4  | 99 | 99 | 99 | 99 |
| 4  | 2  | 4  | 2  | 2  | 2  | 3  | 3  |
| 2  | 2  | 1  | 1  | 1  | 3  | 3  | 1  |
| 2  | 2  | 2  | 2  | 2  | 2  | 2  | 2  |
| 4  | 3  | 3  | 3  | 1  | 4  | 4  | 3  |
| 2  | 1  | 99 | 3  | 2  | 2  | 3  | 1  |
| 4  | 1  | 4  | 1  | 1  | 4  | 4  | 2  |
| 3  | 2  | 4  | 1  | 1  | 4  | 4  | 4  |
| 3  | 2  | 4  | 2  | 1  | 4  | 4  | 4  |
| 2  | 3  | 4  | 3  | 3  | 3  | 3  | 3  |
| 99 | 99 | 99 | 99 | 99 | 99 | 99 | 99 |
| 2  | 3  | 4  | 3  | 2  | 2  | 2  | 3  |
| 3  | 3  | 3  | 2  | 1  | 2  | 3  | 4  |
| 4  | 2  | 1  | 2  | 1  | 4  | 4  | 2  |
| 4  | 1  | 4  | 1  | 1  | 4  | 4  | 4  |
| 3  | 2  | 3  | 2  | 1  | 4  | 4  | 1  |
| 3  | 2  | 3  | 2  | 1  | 3  | 3  | 3  |
| 3  | 99 | 3  | 1  | 1  | 4  | 3  | 99 |
| 4  | 1  | 4  | 1  | 1  | 4  | 4  | 4  |
| 2  | 2  | 2  | 2  | 2  | 1  | 1  | 1  |
| 2  | 2  | 2  | 2  | 2  | 2  | 2  | 2  |
| 3  | 3  | 4  | 1  | 2  | 1  | 2  | 3  |
| 2  | 3  | 3  | 3  | 2  | 4  | 4  | 4  |
| 4  | 3  | 3  | 2  | 2  | 2  | 3  | 2  |
| 3  | 3  | 4  | 2  | 2  | 3  | 3  | 4  |
| 1  | 4  | 1  | 4  | 4  | 4  | 4  | 3  |
| 2  | 1  | 3  | 2  | 2  | 4  | 4  | 4  |
| 3  | 2  | 3  | 2  | 2  | 2  | 2  | 3  |
| 3  | 2  | 3  | 2  | 2  | 3  | 4  | 99 |
| 2  | 3  | 3  | 2  | 2  | 3  | 3  | 3  |
| 2  | 3  | 4  | 2  | 2  | 3  | 4  | 4  |
| 3  | 2  | 4  | 1  | 1  | 4  | 4  | 4  |
| 3  | 99 | 3  | 99 | 99 | 3  | 3  | 3  |
| 3  | 2  | 3  | 2  | 2  | 2  | 2  | 2  |

|    |    |    |    |    |    |    |    |
|----|----|----|----|----|----|----|----|
| 3  | 3  | 3  | 2  | 1  | 3  | 3  | 3  |
| 3  | 2  | 4  | 3  | 1  | 4  | 4  | 4  |
| 99 | 99 | 99 | 99 | 99 | 99 | 99 | 3  |
| 3  | 3  | 2  | 3  | 1  | 3  | 3  | 3  |
| 1  | 2  | 3  | 3  | 3  | 2  | 2  | 3  |
| 2  | 1  | 4  | 1  | 1  | 2  | 4  | 4  |
| 3  | 2  | 3  | 2  | 2  | 3  | 3  | 4  |
| 4  | 2  | 4  | 3  | 2  | 99 | 99 | 99 |
| 2  | 3  | 2  | 3  | 2  | 3  | 4  | 4  |
| 3  | 2  | 3  | 2  | 2  | 2  | 3  | 2  |
| 4  | 1  | 4  | 1  | 1  | 4  | 4  | 99 |
| 4  | 1  | 4  | 1  | 1  | 4  | 4  | 4  |
| 2  | 1  | 3  | 1  | 1  | 3  | 3  | 2  |
| 2  | 4  | 2  | 3  | 3  | 2  | 3  | 2  |
| 4  | 2  | 3  | 2  | 2  | 2  | 2  | 3  |
| 4  | 2  | 4  | 1  | 1  | 4  | 4  | 4  |
| 4  | 2  | 4  | 1  | 1  | 3  | 3  | 4  |
| 2  | 1  | 1  | 1  | 1  | 4  | 4  | 4  |
| 3  | 2  | 3  | 2  | 1  | 2  | 2  | 3  |
| 2  | 3  | 4  | 3  | 1  | 3  | 3  | 3  |
| 3  | 2  | 3  | 2  | 2  | 3  | 3  | 3  |
| 4  | 1  | 4  | 1  | 1  | 4  | 4  | 3  |
| 2  | 1  | 4  | 1  | 1  | 4  | 4  | 4  |
| 1  | 1  | 1  | 1  | 1  | 4  | 3  | 2  |
| 2  | 3  | 4  | 2  | 2  | 3  | 4  | 4  |
| 3  | 2  | 3  | 2  | 2  | 3  | 3  | 3  |
| 4  | 1  | 4  | 1  | 1  | 4  | 4  | 2  |
| 1  | 3  | 3  | 99 | 99 | 99 | 99 | 99 |
| 2  | 4  | 2  | 3  | 2  | 4  | 4  | 4  |
| 3  | 1  | 4  | 1  | 1  | 4  | 4  | 4  |
| 2  | 2  | 4  | 2  | 2  | 3  | 3  | 3  |
| 2  | 3  | 99 | 99 | 1  | 3  | 2  | 1  |
| 2  | 2  | 3  | 2  | 2  | 4  | 2  | 2  |
| 2  | 2  | 3  | 99 | 2  | 2  | 2  | 3  |
| 99 | 1  | 4  | 1  | 1  | 99 | 4  | 4  |
| 99 | 99 | 99 | 99 | 99 | 1  | 1  | 1  |
| 3  | 2  | 3  | 2  | 2  | 3  | 3  | 3  |
| 4  | 1  | 4  | 1  | 1  | 2  | 3  | 3  |
| 3  | 2  | 3  | 2  | 2  | 4  | 4  | 3  |
| 2  | 3  | 4  | 3  | 2  | 2  | 1  | 3  |
| 4  | 2  | 4  | 1  | 1  | 4  | 4  | 3  |
| 3  | 1  | 3  | 2  | 1  | 4  | 3  | 4  |
| 2  | 1  | 4  | 3  | 2  | 3  | 4  | 4  |
| 1  | 2  | 3  | 3  | 3  | 4  | 4  | 4  |
| 2  | 3  | 3  | 99 | 2  | 3  | 3  | 3  |
| 4  | 4  | 4  | 4  | 4  | 4  | 4  | 4  |
| 99 | 99 | 99 | 99 | 99 | 99 | 99 | 99 |
| 4  | 1  | 1  | 1  | 1  | 2  | 2  | 3  |

|    |    |    |    |    |    |    |    |
|----|----|----|----|----|----|----|----|
| 99 | 3  | 3  | 3  | 2  | 4  | 4  | 4  |
| 4  | 1  | 99 | 1  | 1  | 4  | 4  | 4  |
| 2  | 1  | 3  | 1  | 1  | 1  | 1  | 1  |
| 2  | 3  | 3  | 4  | 3  | 2  | 3  | 3  |
| 3  | 1  | 4  | 2  | 1  | 3  | 3  | 3  |
| 3  | 2  | 4  | 3  | 1  | 3  | 4  | 4  |
| 2  | 2  | 2  | 2  | 2  | 4  | 2  | 4  |
| 3  | 1  | 3  | 1  | 1  | 4  | 4  | 3  |
| 3  | 2  | 4  | 2  | 1  | 2  | 2  | 4  |
| 3  | 2  | 3  | 2  | 2  | 3  | 3  | 3  |
| 2  | 3  | 3  | 3  | 2  | 3  | 2  | 2  |
| 3  | 2  | 2  | 2  | 2  | 3  | 2  | 2  |
| 4  | 3  | 99 | 99 | 1  | 4  | 4  | 4  |
| 1  | 1  | 1  | 1  | 1  | 4  | 4  | 4  |
| 3  | 2  | 3  | 3  | 1  | 3  | 3  | 3  |
| 4  | 2  | 2  | 2  | 2  | 4  | 4  | 4  |
| 4  | 2  | 4  | 2  | 1  | 4  | 4  | 4  |
| 4  | 1  | 4  | 1  | 1  | 4  | 4  | 4  |
| 3  | 2  | 4  | 1  | 1  | 4  | 4  | 4  |
| 4  | 1  | 4  | 1  | 1  | 4  | 4  | 4  |
| 2  | 2  | 3  | 99 | 99 | 3  | 3  | 3  |
| 1  | 99 | 4  | 1  | 1  | 4  | 4  | 3  |
| 99 | 99 | 99 | 99 | 99 | 99 | 99 | 99 |
| 3  | 2  | 3  | 2  | 1  | 4  | 4  | 4  |
| 1  | 2  | 2  | 3  | 1  | 4  | 4  | 3  |
| 4  | 1  | 4  | 1  | 1  | 99 | 99 | 99 |
| 1  | 99 | 99 | 99 | 99 | 99 | 99 | 99 |
| 3  | 2  | 3  | 2  | 1  | 2  | 2  | 99 |
| 2  | 2  | 2  | 2  | 2  | 3  | 3  | 3  |
| 1  | 1  | 4  | 1  | 1  | 3  | 4  | 3  |
| 99 | 99 | 99 | 99 | 99 | 99 | 99 | 99 |
| 4  | 1  | 4  | 2  | 1  | 1  | 1  | 4  |
| 4  | 1  | 3  | 1  | 1  | 3  | 3  | 3  |
| 4  | 1  | 99 | 2  | 1  | 4  | 4  | 3  |
| 99 | 99 | 99 | 99 | 99 | 99 | 99 | 99 |
| 99 | 99 | 99 | 2  | 2  | 3  | 4  | 99 |
| 4  | 1  | 2  | 1  | 1  | 4  | 4  | 4  |
| 4  | 3  | 4  | 2  | 1  | 4  | 4  | 4  |
| 4  | 1  | 4  | 1  | 1  | 4  | 4  | 2  |
| 4  | 99 | 4  | 1  | 1  | 4  | 4  | 99 |
| 1  | 1  | 1  | 1  | 1  | 3  | 3  | 4  |
| 4  | 1  | 3  | 1  | 1  | 2  | 3  | 1  |
| 3  | 3  | 3  | 2  | 1  | 2  | 2  | 2  |
| 4  | 1  | 4  | 1  | 1  | 4  | 4  | 4  |
| 1  | 3  | 4  | 3  | 1  | 1  | 4  | 4  |
| 4  | 3  | 3  | 3  | 1  | 2  | 3  | 4  |
| 4  | 1  | 4  | 1  | 1  | 4  | 4  | 4  |
| 3  | 1  | 1  | 1  | 1  | 4  | 4  | 3  |

|   |    |    |   |   |    |    |    |
|---|----|----|---|---|----|----|----|
| 3 | 3  | 1  | 1 | 1 | 4  | 4  | 4  |
| 2 | 2  | 3  | 3 | 2 | 3  | 3  | 3  |
| 4 | 1  | 4  | 1 | 1 | 99 | 99 | 1  |
| 4 | 2  | 1  | 1 | 1 | 2  | 3  | 3  |
| 2 | 3  | 3  | 3 | 1 | 3  | 4  | 2  |
| 4 | 1  | 1  | 1 | 1 | 3  | 3  | 1  |
| 4 | 2  | 3  | 1 | 1 | 3  | 4  | 3  |
| 4 | 2  | 3  | 3 | 1 | 3  | 3  | 2  |
| 2 | 1  | 4  | 3 | 1 | 4  | 4  | 1  |
| 3 | 3  | 4  | 3 | 1 | 4  | 4  | 99 |
| 3 | 3  | 3  | 2 | 2 | 3  | 3  | 3  |
| 4 | 1  | 4  | 1 | 1 | 2  | 4  | 3  |
| 2 | 2  | 2  | 3 | 1 | 3  | 4  | 1  |
| 3 | 3  | 3  | 3 | 2 | 4  | 4  | 4  |
| 3 | 1  | 3  | 1 | 1 | 3  | 3  | 4  |
| 1 | 3  | 2  | 3 | 2 | 1  | 1  | 4  |
| 3 | 3  | 3  | 3 | 3 | 4  | 2  | 3  |
| 2 | 1  | 4  | 2 | 2 | 3  | 3  | 3  |
| 2 | 3  | 3  | 2 | 2 | 3  | 3  | 3  |
| 4 | 2  | 4  | 1 | 2 | 4  | 4  | 4  |
| 2 | 3  | 3  | 3 | 3 | 3  | 2  | 4  |
| 3 | 4  | 3  | 3 | 2 | 3  | 3  | 2  |
| 3 | 2  | 3  | 2 | 2 | 2  | 2  | 3  |
| 2 | 3  | 2  | 3 | 2 | 4  | 4  | 3  |
| 2 | 3  | 4  | 3 | 2 | 2  | 1  | 3  |
| 4 | 4  | 4  | 2 | 4 | 99 | 99 | 99 |
| 4 | 1  | 4  | 1 | 1 | 4  | 4  | 4  |
| 3 | 2  | 3  | 2 | 1 | 4  | 4  | 3  |
| 4 | 1  | 4  | 1 | 1 | 4  | 4  | 4  |
| 4 | 1  | 3  | 1 | 1 | 4  | 4  | 3  |
| 3 | 1  | 4  | 1 | 1 | 4  | 3  | 4  |
| 3 | 1  | 4  | 1 | 1 | 3  | 4  | 1  |
| 2 | 3  | 3  | 4 | 4 | 99 | 99 | 99 |
| 3 | 99 | 99 | 2 | 2 | 99 | 99 | 99 |
| 3 | 2  | 3  | 2 | 1 | 3  | 3  | 3  |
| 3 | 3  | 2  | 3 | 2 | 99 | 99 | 99 |
| 2 | 2  | 2  | 2 | 2 | 2  | 2  | 2  |
| 4 | 1  | 4  | 1 | 1 | 4  | 4  | 4  |
| 3 | 2  | 3  | 2 | 2 | 3  | 3  | 4  |
| 3 | 1  | 4  | 1 | 1 | 4  | 4  | 3  |
| 1 | 2  | 4  | 3 | 3 | 3  | 1  | 3  |
| 3 | 3  | 3  | 3 | 2 | 3  | 3  | 3  |
| 2 | 2  | 3  | 1 | 1 | 4  | 4  | 3  |
| 4 | 1  | 4  | 1 | 1 | 4  | 4  | 4  |
| 2 | 3  | 3  | 3 | 2 | 2  | 3  | 4  |
| 2 | 3  | 3  | 2 | 2 | 3  | 2  | 3  |
| 4 | 2  | 3  | 2 | 1 | 3  | 4  | 2  |
| 3 | 1  | 4  | 1 | 1 | 3  | 3  | 3  |

|    |    |    |    |    |    |    |    |
|----|----|----|----|----|----|----|----|
| 4  | 1  | 4  | 1  | 1  | 4  | 4  | 4  |
| 1  | 4  | 4  | 1  | 1  | 4  | 4  | 4  |
| 99 | 99 | 99 | 99 | 99 | 99 | 99 | 99 |
| 2  | 3  | 3  | 4  | 2  | 4  | 4  | 4  |
| 4  | 1  | 4  | 1  | 1  | 4  | 4  | 99 |
| 3  | 3  | 4  | 2  | 2  | 3  | 3  | 4  |
| 4  | 4  | 1  | 1  | 1  | 4  | 4  | 4  |
| 2  | 3  | 4  | 4  | 2  | 1  | 2  | 3  |
| 99 | 99 | 99 | 99 | 99 | 99 | 99 | 99 |
| 3  | 3  | 3  | 3  | 1  | 4  | 3  | 3  |
| 2  | 4  | 4  | 1  | 1  | 4  | 4  | 4  |
| 4  | 2  | 3  | 2  | 3  | 4  | 3  | 3  |
| 4  | 4  | 4  | 2  | 1  | 4  | 3  | 3  |
| 3  | 3  | 2  | 2  | 2  | 2  | 2  | 2  |
| 3  | 2  | 2  | 1  | 1  | 4  | 4  | 4  |
| 4  | 1  | 4  | 1  | 1  | 4  | 4  | 4  |
| 2  | 1  | 1  | 1  | 1  | 3  | 4  | 3  |
| 3  | 3  | 3  | 2  | 1  | 2  | 3  | 3  |
| 2  | 3  | 3  | 3  | 3  | 3  | 3  | 3  |
| 4  | 3  | 3  | 1  | 1  | 4  | 4  | 3  |
| 3  | 3  | 3  | 2  | 2  | 2  | 3  | 3  |
| 3  | 2  | 4  | 2  | 1  | 3  | 4  | 4  |
| 1  | 3  | 1  | 3  | 1  | 3  | 3  | 2  |
| 3  | 2  | 3  | 2  | 2  | 2  | 2  | 2  |
| 3  | 99 | 2  | 2  | 1  | 2  | 1  | 3  |
| 4  | 1  | 99 | 1  | 1  | 1  | 99 | 99 |
| 4  | 2  | 4  | 2  | 1  | 2  | 2  | 3  |
| 4  | 1  | 4  | 2  | 1  | 3  | 2  | 3  |
| 3  | 2  | 4  | 2  | 1  | 3  | 4  | 3  |
| 4  | 4  | 4  | 99 | 1  | 1  | 1  | 1  |
| 3  | 3  | 4  | 3  | 2  | 3  | 3  | 4  |
| 2  | 3  | 3  | 2  | 2  | 3  | 3  | 3  |
| 3  | 2  | 3  | 2  | 2  | 3  | 3  | 99 |
| 2  | 1  | 99 | 99 | 1  | 3  | 3  | 3  |
| 3  | 3  | 3  | 3  | 1  | 3  | 3  | 3  |
| 3  | 1  | 4  | 1  | 1  | 4  | 4  | 3  |
| 2  | 2  | 3  | 2  | 1  | 3  | 3  | 3  |
| 3  | 2  | 3  | 3  | 2  | 3  | 3  | 99 |
| 3  | 2  | 4  | 2  | 1  | 2  | 1  | 3  |
| 3  | 2  | 3  | 2  | 1  | 3  | 4  | 3  |
| 4  | 1  | 4  | 1  | 1  | 4  | 4  | 4  |
| 1  | 4  | 99 | 3  | 2  | 4  | 4  | 2  |
| 2  | 3  | 1  | 2  | 2  | 3  | 3  | 3  |
| 4  | 2  | 3  | 3  | 1  | 1  | 1  | 4  |
| 99 | 1  | 99 | 99 | 99 | 2  | 2  | 2  |
| 3  | 2  | 3  | 3  | 2  | 2  | 2  | 3  |
| 4  | 1  | 4  | 1  | 1  | 4  | 4  | 4  |
| 4  | 2  | 4  | 3  | 1  | 3  | 4  | 3  |



|    |    |    |    |    |    |    |    |
|----|----|----|----|----|----|----|----|
| 3  | 3  | 3  | 2  | 1  | 3  | 3  | 2  |
| 4  | 1  | 4  | 1  | 1  | 2  | 3  | 2  |
| 3  | 2  | 3  | 2  | 1  | 4  | 4  | 4  |
| 4  | 1  | 4  | 1  | 1  | 4  | 4  | 4  |
| 3  | 99 | 3  | 99 | 1  | 3  | 3  | 3  |
| 99 | 99 | 4  | 2  | 2  | 4  | 4  | 4  |
| 4  | 1  | 4  | 1  | 1  | 4  | 4  | 4  |
| 3  | 2  | 3  | 1  | 1  | 4  | 3  | 4  |
| 4  | 1  | 4  | 1  | 1  | 2  | 2  | 3  |
| 2  | 4  | 1  | 4  | 2  | 2  | 2  | 3  |
| 4  | 1  | 4  | 1  | 1  | 4  | 3  | 3  |
| 2  | 2  | 3  | 2  | 1  | 2  | 2  | 3  |
| 3  | 2  | 3  | 2  | 2  | 3  | 3  | 2  |
| 4  | 2  | 4  | 2  | 1  | 99 | 4  | 4  |
| 4  | 1  | 4  | 4  | 1  | 3  | 4  | 4  |
| 4  | 1  | 4  | 1  | 1  | 4  | 4  | 4  |
| 4  | 1  | 4  | 3  | 1  | 4  | 4  | 4  |
| 99 | 99 | 4  | 1  | 1  | 99 | 99 | 99 |
| 4  | 1  | 3  | 1  | 1  | 3  | 3  | 3  |
| 1  | 1  | 1  | 1  | 1  | 99 | 99 | 99 |
| 4  | 1  | 3  | 1  | 1  | 3  | 3  | 4  |
| 3  | 2  | 4  | 2  | 2  | 4  | 3  | 3  |
| 1  | 2  | 3  | 2  | 2  | 1  | 1  | 1  |
| 4  | 1  | 4  | 1  | 1  | 1  | 1  | 4  |
| 3  | 2  | 3  | 2  | 2  | 3  | 3  | 3  |
| 3  | 3  | 3  | 2  | 1  | 4  | 4  | 3  |
| 3  | 2  | 3  | 2  | 1  | 2  | 2  | 1  |
| 2  | 1  | 2  | 3  | 1  | 4  | 4  | 4  |
| 3  | 3  | 3  | 2  | 2  | 3  | 3  | 3  |
| 3  | 3  | 3  | 3  | 2  | 3  | 2  | 3  |
| 3  | 2  | 3  | 2  | 1  | 4  | 3  | 3  |
| 3  | 2  | 3  | 1  | 1  | 2  | 3  | 3  |
| 1  | 99 | 99 | 1  | 1  | 2  | 3  | 4  |
| 4  | 1  | 99 | 1  | 1  | 4  | 4  | 4  |
| 2  | 3  | 4  | 1  | 1  | 3  | 3  | 3  |
| 4  | 1  | 4  | 1  | 1  | 2  | 4  | 2  |
| 4  | 1  | 4  | 1  | 1  | 4  | 4  | 4  |
| 4  | 1  | 4  | 1  | 1  | 99 | 99 | 4  |
| 1  | 1  | 1  | 2  | 2  | 2  | 2  | 2  |
| 3  | 1  | 1  | 1  | 1  | 3  | 4  | 4  |
| 3  | 2  | 3  | 2  | 2  | 99 | 2  | 2  |
| 3  | 2  | 3  | 2  | 1  | 3  | 3  | 3  |
| 4  | 2  | 4  | 2  | 1  | 2  | 2  | 2  |
| 4  | 1  | 4  | 1  | 1  | 4  | 4  | 4  |
| 3  | 3  | 3  | 3  | 99 | 2  | 2  | 3  |
| 4  | 3  | 4  | 2  | 2  | 4  | 4  | 4  |
| 2  | 3  | 3  | 3  | 2  | 2  | 2  | 3  |
| 3  | 2  | 4  | 1  | 1  | 4  | 4  | 4  |

|    |    |    |    |    |    |    |    |
|----|----|----|----|----|----|----|----|
| 3  | 2  | 2  | 2  | 2  | 4  | 4  | 4  |
| 99 | 2  | 99 | 99 | 99 | 99 | 99 | 99 |
| 3  | 2  | 3  | 2  | 1  | 3  | 3  | 3  |
| 4  | 2  | 4  | 2  | 1  | 4  | 4  | 4  |
| 4  | 1  | 4  | 1  | 1  | 4  | 4  | 4  |
| 3  | 2  | 4  | 1  | 2  | 2  | 3  | 3  |
| 3  | 2  | 1  | 1  | 1  | 3  | 3  | 1  |
| 1  | 3  | 2  | 4  | 3  | 4  | 4  | 4  |
| 3  | 2  | 3  | 2  | 1  | 4  | 4  | 4  |
| 99 | 2  | 3  | 3  | 2  | 4  | 4  | 4  |
| 2  | 3  | 3  | 2  | 2  | 2  | 3  | 3  |
| 3  | 2  | 3  | 2  | 1  | 4  | 4  | 4  |
| 99 | 99 | 99 | 99 | 99 | 99 | 99 | 99 |
| 3  | 2  | 2  | 2  | 2  | 3  | 2  | 2  |
| 3  | 2  | 4  | 2  | 1  | 4  | 4  | 4  |
| 3  | 1  | 4  | 1  | 1  | 1  | 1  | 2  |
| 99 | 2  | 3  | 2  | 2  | 3  | 2  | 2  |
| 2  | 2  | 3  | 2  | 2  | 2  | 2  | 2  |
| 3  | 1  | 4  | 1  | 1  | 4  | 3  | 4  |
| 3  | 2  | 3  | 2  | 2  | 3  | 3  | 4  |
| 3  | 2  | 3  | 2  | 2  | 3  | 3  | 3  |
| 3  | 2  | 3  | 2  | 2  | 2  | 2  | 3  |
| 1  | 2  | 3  | 1  | 1  | 3  | 4  | 3  |
| 1  | 2  | 1  | 1  | 1  | 3  | 3  | 4  |
| 1  | 1  | 4  | 1  | 1  | 3  | 3  | 1  |
| 2  | 2  | 3  | 2  | 1  | 3  | 3  | 3  |
| 1  | 2  | 4  | 2  | 2  | 4  | 4  | 4  |
| 3  | 3  | 4  | 1  | 1  | 2  | 4  | 2  |
| 4  | 3  | 4  | 3  | 1  | 1  | 1  | 2  |
| 3  | 2  | 2  | 3  | 1  | 4  | 4  | 4  |
| 1  | 3  | 2  | 3  | 1  | 3  | 2  | 3  |
| 4  | 3  | 4  | 3  | 1  | 4  | 4  | 3  |
| 3  | 3  | 3  | 3  | 1  | 4  | 4  | 3  |
| 2  | 3  | 3  | 2  | 3  | 4  | 4  | 3  |
| 4  | 1  | 4  | 3  | 1  | 4  | 4  | 2  |
| 2  | 2  | 2  | 2  | 2  | 3  | 3  | 3  |
| 1  | 4  | 3  | 4  | 3  | 4  | 3  | 2  |
| 2  | 3  | 2  | 3  | 3  | 3  | 3  | 2  |
| 4  | 1  | 4  | 1  | 1  | 4  | 4  | 4  |
| 3  | 2  | 3  | 1  | 1  | 1  | 1  | 4  |
| 2  | 2  | 3  | 3  | 1  | 3  | 3  | 2  |
| 4  | 1  | 4  | 1  | 1  | 1  | 1  | 1  |
| 99 | 3  | 3  | 99 | 2  | 3  | 3  | 3  |
| 4  | 99 | 4  | 2  | 2  | 2  | 2  | 99 |
| 4  | 1  | 3  | 99 | 1  | 4  | 4  | 4  |
| 99 | 99 | 99 | 1  | 2  | 4  | 4  | 99 |
| 4  | 2  | 4  | 1  | 1  | 3  | 3  | 4  |
| 1  | 3  | 3  | 2  | 1  | 3  | 3  | 2  |

|    |    |    |    |    |    |    |    |
|----|----|----|----|----|----|----|----|
| 3  | 2  | 3  | 2  | 2  | 4  | 4  | 3  |
| 2  | 1  | 3  | 2  | 1  | 3  | 3  | 4  |
| 3  | 3  | 3  | 2  | 2  | 3  | 3  | 2  |
| 4  | 1  | 4  | 1  | 1  | 2  | 1  | 2  |
| 1  | 2  | 4  | 1  | 1  | 4  | 4  | 4  |
| 2  | 3  | 3  | 2  | 1  | 3  | 3  | 2  |
| 3  | 99 | 1  | 99 | 1  | 3  | 3  | 3  |
| 1  | 1  | 4  | 2  | 1  | 2  | 2  | 4  |
| 4  | 1  | 4  | 1  | 1  | 4  | 4  | 1  |
| 3  | 1  | 1  | 1  | 1  | 4  | 3  | 3  |
| 4  | 2  | 4  | 1  | 1  | 3  | 3  | 3  |
| 3  | 2  | 3  | 3  | 2  | 4  | 4  | 3  |
| 3  | 2  | 3  | 2  | 1  | 2  | 2  | 3  |
| 4  | 1  | 4  | 2  | 1  | 4  | 4  | 4  |
| 4  | 1  | 99 | 1  | 1  | 4  | 4  | 4  |
| 1  | 3  | 2  | 3  | 3  | 4  | 4  | 4  |
| 3  | 2  | 3  | 3  | 2  | 3  | 3  | 3  |
| 4  | 1  | 4  | 1  | 1  | 4  | 4  | 4  |
| 1  | 3  | 2  | 3  | 4  | 4  | 4  | 3  |
| 4  | 99 | 4  | 1  | 1  | 4  | 4  | 4  |
| 4  | 1  | 3  | 1  | 1  | 2  | 1  | 3  |
| 2  | 2  | 2  | 2  | 99 | 1  | 1  | 4  |
| 2  | 3  | 2  | 2  | 2  | 4  | 4  | 4  |
| 3  | 2  | 3  | 2  | 2  | 3  | 3  | 2  |
| 3  | 2  | 4  | 1  | 1  | 4  | 4  | 4  |
| 2  | 1  | 1  | 1  | 1  | 4  | 4  | 4  |
| 3  | 2  | 99 | 2  | 1  | 3  | 3  | 99 |
| 2  | 2  | 3  | 2  | 2  | 3  | 3  | 3  |
| 3  | 2  | 3  | 2  | 2  | 3  | 3  | 3  |
| 4  | 1  | 4  | 3  | 2  | 4  | 4  | 4  |
| 2  | 3  | 4  | 3  | 1  | 2  | 3  | 2  |
| 2  | 3  | 3  | 2  | 2  | 3  | 3  | 3  |
| 99 | 4  | 99 | 1  | 1  | 3  | 3  | 99 |
| 2  | 2  | 4  | 2  | 1  | 2  | 2  | 2  |
| 2  | 3  | 2  | 3  | 2  | 2  | 2  | 3  |
| 3  | 2  | 4  | 2  | 1  | 3  | 4  | 4  |
| 3  | 3  | 3  | 3  | 3  | 99 | 99 | 99 |
| 4  | 1  | 99 | 99 | 1  | 2  | 4  | 4  |
| 2  | 2  | 3  | 99 | 2  | 4  | 3  | 3  |
| 3  | 2  | 4  | 2  | 1  | 2  | 3  | 2  |
| 3  | 2  | 4  | 2  | 1  | 99 | 99 | 99 |
| 99 | 99 | 3  | 3  | 2  | 2  | 2  | 3  |
| 3  | 2  | 4  | 2  | 1  | 3  | 3  | 3  |
| 2  | 2  | 3  | 2  | 1  | 3  | 2  | 3  |
| 3  | 3  | 2  | 2  | 2  | 4  | 4  | 2  |
| 4  | 3  | 3  | 1  | 1  | 4  | 4  | 4  |
| 1  | 4  | 2  | 3  | 3  | 4  | 4  | 2  |
| 4  | 1  | 4  | 1  | 1  | 4  | 4  | 4  |

|    |   |    |   |   |    |    |    |
|----|---|----|---|---|----|----|----|
| 3  | 1 | 4  | 1 | 1 | 3  | 4  | 4  |
| 4  | 1 | 4  | 1 | 1 | 3  | 4  | 4  |
| 3  | 2 | 4  | 2 | 1 | 3  | 4  | 99 |
| 4  | 1 | 4  | 2 | 1 | 4  | 4  | 4  |
| 1  | 3 | 2  | 3 | 2 | 2  | 2  | 3  |
| 3  | 2 | 4  | 3 | 2 | 4  | 4  | 4  |
| 3  | 1 | 4  | 2 | 1 | 3  | 4  | 3  |
| 2  | 2 | 3  | 2 | 1 | 99 | 99 | 3  |
| 1  | 1 | 4  | 1 | 1 | 4  | 4  | 4  |
| 4  | 2 | 3  | 2 | 1 | 99 | 99 | 99 |
| 3  | 2 | 3  | 2 | 2 | 3  | 3  | 3  |
| 3  | 2 | 3  | 3 | 2 | 2  | 2  | 3  |
| 3  | 2 | 3  | 2 | 2 | 3  | 3  | 3  |
| 4  | 2 | 3  | 2 | 1 | 3  | 4  | 3  |
| 2  | 2 | 3  | 2 | 2 | 3  | 3  | 4  |
| 4  | 2 | 3  | 2 | 2 | 3  | 3  | 3  |
| 3  | 2 | 3  | 3 | 2 | 4  | 4  | 2  |
| 2  | 2 | 2  | 2 | 2 | 4  | 4  | 3  |
| 3  | 3 | 3  | 2 | 2 | 3  | 3  | 3  |
| 3  | 1 | 4  | 2 | 1 | 4  | 4  | 4  |
| 4  | 3 | 3  | 3 | 2 | 2  | 2  | 3  |
| 4  | 3 | 4  | 1 | 1 | 4  | 4  | 2  |
| 3  | 2 | 3  | 2 | 2 | 3  | 3  | 3  |
| 1  | 1 | 1  | 1 | 1 | 2  | 2  | 2  |
| 3  | 4 | 3  | 3 | 4 | 4  | 4  | 4  |
| 2  | 2 | 2  | 2 | 1 | 1  | 1  | 1  |
| 4  | 2 | 4  | 1 | 1 | 2  | 2  | 1  |
| 4  | 1 | 4  | 1 | 1 | 3  | 4  | 4  |
| 2  | 3 | 2  | 3 | 3 | 3  | 3  | 3  |
| 2  | 3 | 2  | 3 | 3 | 4  | 4  | 4  |
| 3  | 2 | 3  | 2 | 2 | 4  | 2  | 3  |
| 2  | 2 | 3  | 2 | 1 | 3  | 3  | 4  |
| 3  | 3 | 3  | 2 | 2 | 3  | 3  | 3  |
| 2  | 2 | 3  | 3 | 2 | 3  | 3  | 3  |
| 4  | 2 | 4  | 1 | 1 | 4  | 4  | 4  |
| 3  | 2 | 3  | 2 | 2 | 4  | 4  | 4  |
| 2  | 2 | 2  | 2 | 2 | 2  | 2  | 2  |
| 2  | 2 | 3  | 2 | 2 | 3  | 3  | 3  |
| 3  | 2 | 4  | 3 | 3 | 3  | 3  | 3  |
| 2  | 2 | 3  | 3 | 2 | 4  | 4  | 4  |
| 3  | 2 | 3  | 3 | 3 | 3  | 3  | 3  |
| 2  | 1 | 99 | 1 | 1 | 4  | 4  | 4  |
| 4  | 3 | 3  | 3 | 2 | 3  | 4  | 2  |
| 3  | 3 | 2  | 3 | 2 | 3  | 3  | 3  |
| 4  | 1 | 4  | 1 | 1 | 4  | 4  | 4  |
| 2  | 3 | 2  | 4 | 3 | 3  | 3  | 4  |
| 2  | 2 | 4  | 2 | 2 | 2  | 2  | 3  |
| 99 | 3 | 4  | 2 | 2 | 3  | 3  | 3  |

|    |    |    |   |   |    |    |    |
|----|----|----|---|---|----|----|----|
| 2  | 3  | 3  | 1 | 1 | 4  | 4  | 4  |
| 3  | 2  | 2  | 1 | 1 | 3  | 3  | 2  |
| 3  | 3  | 2  | 3 | 2 | 3  | 3  | 3  |
| 4  | 1  | 99 | 1 | 1 | 4  | 4  | 4  |
| 4  | 1  | 1  | 4 | 4 | 99 | 99 | 99 |
| 3  | 1  | 4  | 1 | 1 | 3  | 4  | 4  |
| 2  | 2  | 3  | 2 | 1 | 3  | 3  | 4  |
| 4  | 1  | 4  | 1 | 1 | 3  | 4  | 3  |
| 3  | 2  | 4  | 2 | 1 | 4  | 4  | 3  |
| 4  | 1  | 4  | 1 | 1 | 4  | 4  | 4  |
| 2  | 3  | 3  | 3 | 2 | 2  | 2  | 3  |
| 4  | 1  | 4  | 1 | 1 | 3  | 4  | 3  |
| 3  | 2  | 3  | 3 | 3 | 3  | 2  | 2  |
| 2  | 2  | 2  | 2 | 1 | 3  | 3  | 3  |
| 3  | 2  | 2  | 2 | 2 | 3  | 99 | 2  |
| 3  | 2  | 2  | 1 | 1 | 4  | 4  | 4  |
| 99 | 1  | 4  | 1 | 1 | 3  | 4  | 99 |
| 3  | 3  | 3  | 2 | 2 | 3  | 3  | 3  |
| 2  | 3  | 3  | 3 | 2 | 2  | 4  | 3  |
| 2  | 3  | 3  | 3 | 1 | 4  | 4  | 3  |
| 3  | 2  | 3  | 2 | 1 | 2  | 2  | 3  |
| 3  | 2  | 3  | 3 | 2 | 3  | 3  | 3  |
| 4  | 2  | 3  | 2 | 2 | 3  | 3  | 3  |
| 2  | 3  | 4  | 2 | 1 | 4  | 4  | 3  |
| 2  | 1  | 2  | 4 | 2 | 2  | 4  | 3  |
| 4  | 1  | 4  | 1 | 1 | 4  | 4  | 4  |
| 2  | 2  | 99 | 3 | 3 | 4  | 1  | 3  |
| 3  | 1  | 4  | 1 | 1 | 4  | 4  | 3  |
| 3  | 2  | 4  | 1 | 1 | 3  | 4  | 3  |
| 4  | 1  | 4  | 1 | 1 | 4  | 3  | 3  |
| 1  | 3  | 3  | 3 | 3 | 3  | 2  | 4  |
| 1  | 3  | 3  | 4 | 2 | 2  | 2  | 3  |
| 4  | 3  | 3  | 2 | 1 | 4  | 4  | 3  |
| 3  | 1  | 3  | 2 | 1 | 2  | 2  | 3  |
| 4  | 2  | 4  | 1 | 1 | 99 | 4  | 3  |
| 1  | 1  | 1  | 1 | 1 | 2  | 99 | 1  |
| 3  | 2  | 3  | 2 | 2 | 3  | 3  | 3  |
| 3  | 4  | 2  | 4 | 2 | 2  | 3  | 4  |
| 4  | 1  | 1  | 2 | 1 | 4  | 4  | 4  |
| 4  | 1  | 1  | 2 | 1 | 4  | 4  | 4  |
| 4  | 1  | 4  | 2 | 1 | 3  | 1  | 2  |
| 4  | 1  | 4  | 2 | 1 | 4  | 4  | 4  |
| 3  | 1  | 4  | 1 | 1 | 1  | 1  | 4  |
| 2  | 3  | 3  | 3 | 1 | 3  | 3  | 4  |
| 3  | 3  | 4  | 2 | 2 | 2  | 3  | 2  |
| 99 | 99 | 3  | 1 | 1 | 4  | 4  | 4  |
| 4  | 2  | 4  | 2 | 1 | 3  | 3  | 3  |
| 4  | 1  | 99 | 1 | 1 | 1  | 1  | 3  |

|    |    |    |    |    |    |    |    |
|----|----|----|----|----|----|----|----|
| 4  | 1  | 4  | 1  | 1  | 4  | 4  | 4  |
| 2  | 3  | 4  | 3  | 1  | 99 | 99 | 99 |
| 4  | 1  | 4  | 1  | 1  | 1  | 1  | 4  |
| 3  | 2  | 3  | 2  | 1  | 3  | 3  | 3  |
| 4  | 4  | 3  | 4  | 3  | 4  | 4  | 4  |
| 4  | 1  | 3  | 1  | 1  | 3  | 3  | 2  |
| 4  | 2  | 3  | 2  | 2  | 3  | 3  | 3  |
| 3  | 99 | 99 | 99 | 99 | 2  | 2  | 3  |
| 2  | 3  | 3  | 3  | 1  | 3  | 2  | 2  |
| 3  | 3  | 3  | 3  | 1  | 1  | 3  | 1  |
| 3  | 1  | 4  | 1  | 1  | 3  | 3  | 3  |
| 4  | 2  | 3  | 2  | 1  | 4  | 4  | 3  |
| 3  | 3  | 4  | 2  | 1  | 4  | 4  | 3  |
| 2  | 3  | 3  | 2  | 3  | 2  | 2  | 3  |
| 4  | 4  | 4  | 1  | 1  | 4  | 4  | 1  |
| 2  | 2  | 3  | 3  | 1  | 4  | 3  | 3  |
| 4  | 1  | 4  | 1  | 1  | 1  | 1  | 1  |
| 2  | 1  | 99 | 3  | 99 | 2  | 3  | 4  |
| 3  | 2  | 3  | 3  | 2  | 1  | 1  | 1  |
| 3  | 2  | 3  | 2  | 2  | 3  | 3  | 2  |
| 3  | 2  | 2  | 2  | 1  | 3  | 3  | 1  |
| 2  | 2  | 2  | 3  | 3  | 3  | 3  | 3  |
| 99 | 2  | 99 | 2  | 2  | 99 | 2  | 3  |
| 3  | 2  | 3  | 2  | 1  | 3  | 2  | 4  |
| 2  | 3  | 2  | 3  | 2  | 4  | 3  | 4  |
| 2  | 1  | 4  | 2  | 1  | 3  | 3  | 3  |
| 3  | 99 | 3  | 99 | 2  | 3  | 99 | 3  |
| 3  | 2  | 3  | 3  | 1  | 3  | 3  | 2  |
| 3  | 2  | 4  | 2  | 1  | 4  | 4  | 4  |
| 3  | 3  | 4  | 2  | 1  | 2  | 2  | 3  |
| 4  | 1  | 4  | 1  | 1  | 4  | 4  | 99 |
| 4  | 2  | 4  | 2  | 1  | 3  | 3  | 4  |
| 3  | 3  | 3  | 2  | 2  | 3  | 3  | 3  |
| 4  | 2  | 2  | 3  | 1  | 1  | 1  | 2  |
| 3  | 1  | 3  | 1  | 1  | 3  | 3  | 3  |
| 1  | 1  | 1  | 1  | 1  | 3  | 3  | 2  |
| 2  | 3  | 3  | 2  | 2  | 3  | 3  | 3  |
| 3  | 2  | 3  | 2  | 2  | 3  | 3  | 3  |
| 3  | 2  | 4  | 3  | 1  | 4  | 3  | 3  |
| 2  | 2  | 3  | 2  | 2  | 3  | 2  | 3  |
| 4  | 1  | 2  | 2  | 1  | 4  | 4  | 4  |
| 3  | 2  | 3  | 2  | 2  | 2  | 2  | 3  |
| 4  | 2  | 3  | 1  | 1  | 3  | 3  | 4  |
| 3  | 3  | 99 | 3  | 1  | 3  | 99 | 99 |
| 4  | 2  | 4  | 1  | 1  | 3  | 3  | 4  |
| 3  | 2  | 2  | 2  | 2  | 3  | 3  | 2  |
| 3  | 2  | 4  | 1  | 1  | 3  | 4  | 3  |
| 3  | 1  | 4  | 1  | 1  | 3  | 4  | 4  |

|    |    |    |    |    |    |    |    |
|----|----|----|----|----|----|----|----|
| 4  | 1  | 4  | 3  | 1  | 4  | 4  | 4  |
| 3  | 3  | 3  | 3  | 99 | 3  | 3  | 3  |
| 4  | 1  | 99 | 99 | 1  | 4  | 4  | 4  |
| 3  | 1  | 4  | 1  | 1  | 3  | 3  | 4  |
| 99 | 99 | 99 | 99 | 99 | 99 | 99 | 99 |
| 4  | 1  | 4  | 1  | 1  | 3  | 2  | 3  |
| 1  | 3  | 3  | 3  | 1  | 4  | 4  | 4  |
| 2  | 2  | 2  | 2  | 2  | 2  | 2  | 2  |
| 3  | 2  | 2  | 2  | 2  | 2  | 2  | 3  |
| 3  | 3  | 4  | 3  | 2  | 2  | 3  | 3  |
| 3  | 2  | 3  | 3  | 2  | 3  | 3  | 3  |
| 2  | 2  | 3  | 2  | 2  | 2  | 3  | 3  |
| 4  | 2  | 3  | 1  | 1  | 4  | 4  | 4  |
| 3  | 2  | 3  | 2  | 2  | 4  | 1  | 3  |
| 4  | 1  | 4  | 1  | 1  | 3  | 3  | 1  |
| 3  | 1  | 4  | 1  | 1  | 3  | 4  | 4  |
| 2  | 2  | 2  | 1  | 1  | 3  | 3  | 3  |
| 3  | 2  | 3  | 2  | 2  | 3  | 3  | 3  |
| 3  | 4  | 1  | 4  | 4  | 1  | 3  | 2  |
| 3  | 2  | 3  | 2  | 2  | 3  | 2  | 3  |
| 4  | 3  | 4  | 2  | 1  | 3  | 2  | 4  |
| 3  | 4  | 3  | 4  | 2  | 4  | 3  | 4  |
| 2  | 2  | 3  | 2  | 2  | 4  | 4  | 4  |
| 3  | 2  | 3  | 2  | 2  | 4  | 4  | 4  |
| 3  | 2  | 4  | 2  | 1  | 3  | 4  | 4  |
| 2  | 2  | 4  | 1  | 1  | 3  | 3  | 4  |
| 2  | 2  | 3  | 3  | 99 | 3  | 3  | 3  |
| 2  | 2  | 3  | 2  | 2  | 3  | 3  | 2  |
| 2  | 2  | 4  | 3  | 3  | 3  | 1  | 3  |
| 3  | 2  | 3  | 2  | 2  | 2  | 2  | 3  |
| 2  | 3  | 2  | 3  | 2  | 2  | 3  | 3  |
| 2  | 2  | 3  | 2  | 2  | 1  | 1  | 3  |
| 4  | 2  | 3  | 2  | 1  | 4  | 4  | 3  |
| 4  | 1  | 4  | 1  | 1  | 4  | 4  | 4  |
| 3  | 2  | 3  | 2  | 2  | 4  | 2  | 3  |
| 3  | 2  | 3  | 2  | 1  | 4  | 4  | 4  |
| 3  | 2  | 4  | 2  | 1  | 2  | 3  | 4  |
| 3  | 2  | 4  | 1  | 1  | 1  | 1  | 3  |
| 3  | 2  | 3  | 2  | 2  | 3  | 3  | 3  |
| 4  | 2  | 4  | 2  | 1  | 4  | 4  | 4  |
| 4  | 2  | 4  | 1  | 1  | 4  | 3  | 3  |
| 2  | 3  | 3  | 2  | 3  | 1  | 1  | 1  |
| 2  | 2  | 4  | 2  | 2  | 3  | 3  | 4  |
| 2  | 2  | 3  | 2  | 2  | 3  | 3  | 2  |
| 3  | 2  | 1  | 2  | 1  | 4  | 4  | 4  |
| 2  | 4  | 3  | 99 | 3  | 2  | 1  | 2  |
| 2  | 3  | 3  | 99 | 3  | 2  | 2  | 2  |
| 4  | 3  | 3  | 2  | 1  | 3  | 3  | 3  |

|    |    |    |    |    |    |    |    |
|----|----|----|----|----|----|----|----|
| 3  | 3  | 4  | 3  | 1  | 3  | 4  | 3  |
| 1  | 1  | 3  | 3  | 1  | 3  | 3  | 3  |
| 3  | 2  | 2  | 2  | 2  | 2  | 2  | 2  |
| 2  | 3  | 2  | 2  | 1  | 4  | 4  | 3  |
| 4  | 1  | 4  | 1  | 1  | 4  | 4  | 4  |
| 3  | 2  | 4  | 3  | 1  | 4  | 4  | 4  |
| 4  | 1  | 1  | 1  | 1  | 3  | 3  | 3  |
| 2  | 3  | 3  | 3  | 1  | 4  | 4  | 3  |
| 4  | 1  | 4  | 1  | 1  | 4  | 4  | 3  |
| 2  | 1  | 3  | 3  | 1  | 2  | 3  | 4  |
| 4  | 1  | 3  | 1  | 1  | 2  | 3  | 2  |
| 3  | 1  | 3  | 1  | 1  | 3  | 3  | 3  |
| 4  | 1  | 4  | 1  | 1  | 3  | 3  | 4  |
| 3  | 2  | 3  | 3  | 1  | 2  | 3  | 3  |
| 99 | 99 | 99 | 99 | 99 | 4  | 4  | 99 |
| 2  | 2  | 4  | 3  | 1  | 4  | 4  | 4  |
| 3  | 3  | 3  | 3  | 1  | 4  | 4  | 4  |
| 4  | 1  | 99 | 1  | 1  | 4  | 4  | 4  |
| 4  | 2  | 3  | 2  | 1  | 3  | 3  | 3  |
| 4  | 1  | 3  | 2  | 1  | 99 | 99 | 99 |
| 3  | 3  | 4  | 3  | 1  | 3  | 4  | 3  |
| 3  | 2  | 3  | 2  | 2  | 2  | 2  | 2  |
| 3  | 3  | 3  | 3  | 1  | 3  | 2  | 2  |
| 3  | 2  | 3  | 1  | 1  | 3  | 4  | 3  |
| 1  | 3  | 4  | 1  | 1  | 4  | 3  | 3  |
| 1  | 1  | 2  | 1  | 1  | 3  | 2  | 4  |
| 4  | 3  | 3  | 2  | 2  | 3  | 3  | 3  |
| 3  | 1  | 4  | 1  | 1  | 4  | 4  | 4  |
| 3  | 1  | 3  | 2  | 1  | 3  | 2  | 3  |
| 4  | 2  | 4  | 1  | 1  | 4  | 4  | 3  |
| 4  | 2  | 4  | 2  | 1  | 2  | 3  | 3  |
| 3  | 99 | 4  | 3  | 1  | 3  | 4  | 3  |
| 4  | 3  | 3  | 2  | 1  | 4  | 3  | 4  |
| 3  | 2  | 3  | 2  | 1  | 3  | 3  | 2  |
| 2  | 3  | 2  | 2  | 1  | 4  | 3  | 4  |
| 4  | 1  | 4  | 1  | 1  | 3  | 4  | 4  |
| 2  | 3  | 4  | 2  | 1  | 1  | 1  | 2  |
| 3  | 1  | 4  | 1  | 1  | 1  | 1  | 2  |
| 1  | 2  | 3  | 2  | 1  | 2  | 2  | 4  |
| 2  | 2  | 3  | 1  | 1  | 4  | 4  | 4  |
| 4  | 1  | 4  | 1  | 1  | 4  | 4  | 4  |
| 4  | 1  | 4  | 1  | 1  | 4  | 4  | 4  |
| 99 | 99 | 99 | 99 | 1  | 99 | 99 | 99 |
| 2  | 3  | 2  | 3  | 3  | 3  | 2  | 3  |
| 3  | 1  | 4  | 2  | 1  | 4  | 4  | 4  |
| 4  | 4  | 4  | 1  | 1  | 4  | 4  | 4  |
| 3  | 2  | 3  | 1  | 1  | 3  | 2  | 2  |
| 2  | 3  | 3  | 3  | 2  | 3  | 3  | 3  |



|    |    |    |   |    |    |   |   |
|----|----|----|---|----|----|---|---|
| 3  | 3  | 3  | 2 | 2  | 3  | 3 | 3 |
| 3  | 2  | 3  | 3 | 3  | 3  | 3 | 2 |
| 3  | 2  | 3  | 2 | 2  | 2  | 3 | 3 |
| 2  | 2  | 3  | 2 | 1  | 3  | 3 | 2 |
| 2  | 2  | 3  | 2 | 2  | 3  | 3 | 3 |
| 1  | 4  | 1  | 4 | 2  | 4  | 4 | 3 |
| 2  | 3  | 3  | 3 | 2  | 3  | 3 | 3 |
| 2  | 1  | 4  | 1 | 1  | 1  | 3 | 4 |
| 1  | 1  | 4  | 3 | 1  | 2  | 3 | 4 |
| 4  | 1  | 4  | 1 | 1  | 4  | 4 | 4 |
| 2  | 4  | 2  | 4 | 4  | 2  | 2 | 2 |
| 2  | 1  | 3  | 1 | 1  | 1  | 1 | 1 |
| 3  | 3  | 3  | 3 | 3  | 99 | 2 | 3 |
| 2  | 2  | 3  | 3 | 1  | 2  | 3 | 3 |
| 2  | 3  | 3  | 3 | 3  | 2  | 2 | 2 |
| 2  | 3  | 3  | 3 | 3  | 2  | 2 | 2 |
| 3  | 3  | 4  | 2 | 2  | 2  | 2 | 3 |
| 3  | 2  | 2  | 2 | 2  | 2  | 2 | 3 |
| 3  | 2  | 4  | 1 | 1  | 2  | 3 | 1 |
| 1  | 4  | 4  | 2 | 1  | 3  | 2 | 4 |
| 3  | 2  | 3  | 2 | 2  | 4  | 4 | 4 |
| 99 | 99 | 99 | 2 | 2  | 3  | 3 | 3 |
| 3  | 2  | 3  | 2 | 2  | 3  | 3 | 3 |
| 2  | 2  | 3  | 2 | 1  | 3  | 2 | 3 |
| 2  | 2  | 3  | 2 | 2  | 4  | 4 | 3 |
| 2  | 3  | 3  | 2 | 1  | 2  | 3 | 3 |
| 1  | 3  | 3  | 3 | 3  | 3  | 3 | 3 |
| 99 | 2  | 3  | 2 | 99 | 4  | 3 | 4 |
| 3  | 2  | 4  | 1 | 1  | 3  | 4 | 4 |
| 3  | 2  | 3  | 2 | 2  | 4  | 4 | 4 |
| 3  | 1  | 3  | 2 | 1  | 3  | 3 | 2 |
| 3  | 3  | 4  | 4 | 3  | 3  | 2 | 3 |
| 3  | 2  | 3  | 2 | 1  | 4  | 4 | 4 |
| 3  | 3  | 4  | 3 | 2  | 4  | 4 | 4 |
| 2  | 3  | 3  | 3 | 3  | 3  | 3 | 4 |
| 3  | 2  | 2  | 2 | 3  | 4  | 4 | 4 |
| 3  | 2  | 2  | 2 | 2  | 3  | 4 | 4 |
| 4  | 2  | 3  | 2 | 2  | 2  | 2 | 2 |
| 2  | 3  | 3  | 2 | 2  | 3  | 3 | 3 |
| 3  | 2  | 3  | 2 | 2  | 4  | 4 | 4 |
| 3  | 3  | 2  | 2 | 2  | 4  | 4 | 4 |
| 4  | 2  | 4  | 1 | 2  | 3  | 4 | 2 |
| 2  | 2  | 3  | 2 | 2  | 2  | 3 | 4 |
| 4  | 1  | 4  | 1 | 1  | 3  | 3 | 3 |
| 1  | 3  | 4  | 2 | 2  | 2  | 2 | 3 |
| 3  | 2  | 4  | 1 | 1  | 3  | 3 | 3 |
| 2  | 3  | 2  | 3 | 3  | 4  | 4 | 4 |
| 3  | 2  | 3  | 2 | 2  | 3  | 3 | 2 |

|    |    |    |   |    |   |   |    |
|----|----|----|---|----|---|---|----|
| 4  | 1  | 4  | 1 | 1  | 4 | 4 | 4  |
| 1  | 3  | 1  | 4 | 3  | 2 | 1 | 1  |
| 1  | 4  | 2  | 4 | 4  | 4 | 4 | 4  |
| 3  | 2  | 3  | 2 | 2  | 3 | 3 | 3  |
| 1  | 1  | 4  | 1 | 1  | 3 | 1 | 4  |
| 1  | 3  | 2  | 3 | 3  | 2 | 1 | 2  |
| 2  | 3  | 3  | 3 | 2  | 3 | 3 | 3  |
| 3  | 3  | 3  | 3 | 3  | 3 | 3 | 3  |
| 3  | 3  | 2  | 3 | 2  | 3 | 2 | 2  |
| 4  | 2  | 3  | 2 | 1  | 1 | 2 | 4  |
| 2  | 2  | 3  | 3 | 2  | 3 | 3 | 3  |
| 2  | 2  | 3  | 4 | 2  | 4 | 4 | 2  |
| 4  | 99 | 4  | 1 | 1  | 4 | 4 | 4  |
| 3  | 3  | 3  | 2 | 2  | 3 | 3 | 3  |
| 3  | 2  | 3  | 2 | 2  | 2 | 2 | 3  |
| 2  | 3  | 3  | 2 | 1  | 3 | 4 | 3  |
| 1  | 1  | 4  | 1 | 1  | 4 | 1 | 1  |
| 3  | 1  | 4  | 1 | 1  | 4 | 4 | 4  |
| 3  | 2  | 3  | 1 | 2  | 3 | 3 | 3  |
| 2  | 4  | 4  | 3 | 1  | 3 | 3 | 4  |
| 3  | 4  | 3  | 3 | 1  | 4 | 4 | 2  |
| 4  | 1  | 4  | 1 | 1  | 3 | 3 | 4  |
| 3  | 3  | 3  | 2 | 2  | 3 | 3 | 3  |
| 99 | 3  | 3  | 3 | 1  | 4 | 4 | 3  |
| 3  | 3  | 3  | 2 | 2  | 4 | 4 | 4  |
| 3  | 2  | 4  | 2 | 1  | 3 | 3 | 3  |
| 2  | 3  | 3  | 3 | 2  | 2 | 2 | 2  |
| 4  | 1  | 4  | 1 | 1  | 4 | 4 | 4  |
| 2  | 99 | 99 | 2 | 99 | 3 | 3 | 2  |
| 4  | 1  | 4  | 1 | 1  | 4 | 4 | 3  |
| 3  | 2  | 3  | 2 | 4  | 2 | 3 | 3  |
| 3  | 2  | 3  | 2 | 1  | 2 | 3 | 2  |
| 2  | 2  | 4  | 2 | 1  | 3 | 4 | 3  |
| 1  | 1  | 3  | 1 | 1  | 3 | 4 | 3  |
| 2  | 3  | 2  | 3 | 2  | 4 | 4 | 4  |
| 1  | 2  | 4  | 2 | 1  | 4 | 4 | 4  |
| 4  | 1  | 4  | 1 | 1  | 3 | 4 | 4  |
| 3  | 3  | 4  | 4 | 2  | 3 | 3 | 3  |
| 3  | 3  | 4  | 2 | 2  | 4 | 3 | 3  |
| 3  | 3  | 3  | 3 | 1  | 2 | 2 | 4  |
| 2  | 4  | 1  | 4 | 3  | 2 | 2 | 1  |
| 4  | 2  | 4  | 2 | 1  | 4 | 4 | 4  |
| 2  | 2  | 1  | 2 | 1  | 3 | 4 | 4  |
| 4  | 1  | 4  | 2 | 1  | 2 | 4 | 2  |
| 4  | 1  | 4  | 1 | 1  | 4 | 4 | 99 |
| 4  | 1  | 4  | 2 | 1  | 4 | 4 | 4  |
| 2  | 3  | 2  | 3 | 2  | 3 | 3 | 2  |
| 3  | 2  | 3  | 2 | 1  | 3 | 4 | 3  |

|    |    |    |    |    |    |    |    |
|----|----|----|----|----|----|----|----|
| 2  | 2  | 4  | 2  | 2  | 3  | 2  | 4  |
| 1  | 3  | 3  | 3  | 2  | 4  | 4  | 4  |
| 3  | 2  | 3  | 2  | 2  | 3  | 3  | 2  |
| 3  | 2  | 3  | 2  | 1  | 3  | 3  | 3  |
| 4  | 1  | 4  | 1  | 1  | 4  | 4  | 4  |
| 4  | 99 | 99 | 99 | 1  | 4  | 99 | 99 |
| 2  | 2  | 1  | 1  | 1  | 3  | 2  | 2  |
| 3  | 2  | 3  | 3  | 2  | 4  | 3  | 2  |
| 1  | 3  | 4  | 3  | 3  | 1  | 1  | 1  |
| 2  | 2  | 3  | 2  | 2  | 4  | 3  | 3  |
| 4  | 1  | 4  | 1  | 1  | 2  | 4  | 3  |
| 4  | 1  | 4  | 1  | 1  | 4  | 4  | 1  |
| 2  | 3  | 99 | 3  | 99 | 4  | 3  | 3  |
| 2  | 2  | 2  | 3  | 2  | 4  | 2  | 3  |
| 3  | 1  | 3  | 1  | 1  | 3  | 3  | 3  |
| 3  | 2  | 3  | 2  | 2  | 3  | 3  | 3  |
| 4  | 1  | 4  | 1  | 2  | 4  | 3  | 4  |
| 4  | 3  | 4  | 3  | 1  | 4  | 1  | 3  |
| 99 | 2  | 99 | 2  | 2  | 2  | 3  | 2  |
| 3  | 3  | 2  | 3  | 1  | 3  | 3  | 4  |
| 4  | 2  | 3  | 2  | 1  | 4  | 4  | 3  |
| 3  | 1  | 4  | 2  | 1  | 4  | 4  | 4  |
| 3  | 2  | 3  | 2  | 2  | 3  | 3  | 3  |
| 99 | 3  | 3  | 99 | 99 | 3  | 3  | 3  |
| 3  | 99 | 99 | 2  | 2  | 3  | 3  | 3  |
| 3  | 2  | 2  | 2  | 2  | 2  | 2  | 2  |
| 2  | 3  | 2  | 2  | 2  | 3  | 3  | 3  |
| 4  | 2  | 4  | 2  | 1  | 2  | 2  | 4  |
| 4  | 99 | 3  | 1  | 1  | 3  | 4  | 3  |
| 99 | 1  | 4  | 1  | 1  | 4  | 3  | 3  |
| 4  | 1  | 4  | 1  | 1  | 4  | 4  | 4  |
| 1  | 1  | 1  | 1  | 1  | 1  | 1  | 1  |
| 3  | 2  | 3  | 2  | 1  | 4  | 4  | 4  |
| 1  | 3  | 4  | 2  | 2  | 3  | 3  | 4  |
| 4  | 2  | 4  | 1  | 1  | 4  | 4  | 4  |
| 2  | 2  | 2  | 3  | 2  | 3  | 3  | 3  |
| 3  | 2  | 3  | 2  | 2  | 4  | 4  | 4  |
| 2  | 1  | 3  | 2  | 3  | 2  | 3  | 4  |
| 2  | 2  | 99 | 99 | 99 | 99 | 99 | 99 |
| 99 | 99 | 99 | 99 | 99 | 3  | 3  | 4  |
| 3  | 1  | 3  | 3  | 3  | 4  | 4  | 4  |
| 2  | 3  | 2  | 3  | 2  | 1  | 1  | 4  |
| 3  | 2  | 3  | 2  | 1  | 3  | 3  | 3  |
| 2  | 3  | 3  | 3  | 3  | 4  | 4  | 3  |
| 4  | 4  | 4  | 4  | 4  | 4  | 4  | 4  |
| 1  | 2  | 99 | 3  | 1  | 3  | 3  | 3  |
| 3  | 2  | 3  | 2  | 2  | 4  | 4  | 4  |
| 2  | 1  | 4  | 2  | 1  | 2  | 1  | 2  |

|    |    |    |    |    |    |    |    |
|----|----|----|----|----|----|----|----|
| 1  | 3  | 3  | 3  | 3  | 2  | 3  | 3  |
| 3  | 4  | 2  | 99 | 3  | 3  | 3  | 3  |
| 2  | 2  | 3  | 2  | 3  | 4  | 4  | 4  |
| 1  | 1  | 4  | 4  | 4  | 3  | 3  | 3  |
| 2  | 2  | 3  | 3  | 2  | 3  | 3  | 3  |
| 2  | 2  | 2  | 2  | 2  | 3  | 3  | 3  |
| 1  | 4  | 1  | 4  | 4  | 4  | 4  | 1  |
| 1  | 1  | 4  | 1  | 1  | 4  | 4  | 4  |
| 4  | 1  | 4  | 1  | 4  | 4  | 4  | 4  |
| 3  | 2  | 3  | 2  | 1  | 3  | 3  | 2  |
| 99 | 1  | 4  | 1  | 1  | 4  | 4  | 4  |
| 4  | 1  | 4  | 1  | 1  | 4  | 4  | 4  |
| 3  | 1  | 4  | 3  | 2  | 4  | 4  | 4  |
| 4  | 1  | 4  | 1  | 1  | 4  | 4  | 4  |
| 4  | 99 | 1  | 99 | 2  | 4  | 3  | 4  |
| 3  | 2  | 4  | 3  | 2  | 2  | 3  | 3  |
| 3  | 3  | 3  | 3  | 3  | 4  | 4  | 4  |
| 2  | 3  | 2  | 3  | 2  | 3  | 3  | 4  |
| 3  | 2  | 2  | 3  | 3  | 4  | 3  | 3  |
| 3  | 2  | 2  | 4  | 1  | 4  | 4  | 4  |
| 3  | 3  | 4  | 2  | 2  | 2  | 4  | 4  |
| 2  | 1  | 1  | 1  | 1  | 2  | 3  | 3  |
| 4  | 1  | 4  | 1  | 1  | 4  | 4  | 4  |
| 1  | 4  | 3  | 1  | 1  | 1  | 1  | 1  |
| 1  | 4  | 4  | 1  | 1  | 1  | 1  | 1  |
| 3  | 2  | 3  | 2  | 2  | 3  | 3  | 3  |
| 4  | 1  | 4  | 1  | 1  | 3  | 3  | 3  |
| 1  | 1  | 4  | 1  | 1  | 1  | 1  | 1  |
| 3  | 1  | 1  | 1  | 1  | 4  | 4  | 1  |
| 3  | 2  | 3  | 2  | 2  | 3  | 3  | 2  |
| 3  | 2  | 3  | 2  | 1  | 4  | 4  | 4  |
| 4  | 1  | 1  | 1  | 1  | 99 | 99 | 99 |
| 3  | 2  | 99 | 99 | 99 | 99 | 99 | 99 |
| 3  | 3  | 2  | 3  | 2  | 2  | 2  | 2  |
| 3  | 3  | 3  | 2  | 1  | 3  | 3  | 3  |
| 4  | 1  | 4  | 1  | 1  | 4  | 4  | 4  |
| 4  | 1  | 4  | 1  | 1  | 3  | 4  | 4  |
| 99 | 99 | 99 | 1  | 1  | 99 | 99 | 99 |
| 4  | 3  | 99 | 99 | 1  | 3  | 4  | 4  |
| 1  | 1  | 1  | 2  | 1  | 2  | 2  | 1  |
| 4  | 1  | 4  | 1  | 1  | 1  | 1  | 1  |
| 4  | 3  | 3  | 2  | 1  | 4  | 4  | 4  |
| 4  | 1  | 4  | 1  | 1  | 4  | 4  | 4  |
| 4  | 1  | 4  | 1  | 1  | 1  | 1  | 1  |
| 4  | 2  | 3  | 2  | 2  | 2  | 2  | 3  |
| 4  | 1  | 4  | 1  | 1  | 4  | 4  | 4  |
| 4  | 1  | 4  | 2  | 1  | 3  | 4  | 4  |
| 2  | 2  | 4  | 2  | 1  | 3  | 2  | 4  |

|    |    |    |    |   |    |    |    |
|----|----|----|----|---|----|----|----|
| 3  | 2  | 3  | 2  | 2 | 3  | 3  | 3  |
| 1  | 1  | 4  | 4  | 1 | 1  | 1  | 1  |
| 1  | 1  | 4  | 1  | 1 | 1  | 1  | 1  |
| 4  | 1  | 4  | 2  | 1 | 1  | 3  | 4  |
| 3  | 2  | 3  | 2  | 2 | 3  | 3  | 2  |
| 4  | 1  | 3  | 1  | 1 | 3  | 3  | 2  |
| 4  | 1  | 4  | 1  | 1 | 4  | 4  | 4  |
| 3  | 1  | 4  | 2  | 1 | 4  | 4  | 4  |
| 3  | 2  | 3  | 2  | 2 | 2  | 2  | 2  |
| 3  | 2  | 4  | 1  | 1 | 4  | 4  | 2  |
| 4  | 4  | 4  | 1  | 1 | 4  | 4  | 4  |
| 4  | 1  | 4  | 1  | 1 | 3  | 4  | 3  |
| 3  | 3  | 2  | 3  | 2 | 2  | 2  | 99 |
| 4  | 3  | 3  | 2  | 1 | 4  | 4  | 99 |
| 3  | 2  | 3  | 2  | 2 | 2  | 2  | 2  |
| 4  | 4  | 4  | 2  | 4 | 3  | 3  | 3  |
| 4  | 1  | 4  | 1  | 1 | 4  | 4  | 4  |
| 4  | 2  | 99 | 1  | 1 | 99 | 99 | 99 |
| 2  | 3  | 3  | 3  | 2 | 2  | 3  | 2  |
| 1  | 2  | 4  | 2  | 1 | 4  | 4  | 4  |
| 4  | 2  | 3  | 2  | 1 | 3  | 3  | 3  |
| 3  | 2  | 4  | 2  | 1 | 3  | 3  | 3  |
| 4  | 2  | 4  | 1  | 1 | 3  | 3  | 4  |
| 3  | 3  | 3  | 2  | 3 | 2  | 3  | 3  |
| 2  | 2  | 2  | 2  | 2 | 2  | 2  | 2  |
| 4  | 2  | 4  | 1  | 1 | 4  | 4  | 4  |
| 4  | 1  | 4  | 1  | 1 | 4  | 4  | 4  |
| 4  | 1  | 4  | 1  | 1 | 4  | 4  | 4  |
| 4  | 1  | 4  | 1  | 1 | 2  | 3  | 3  |
| 4  | 99 | 99 | 1  | 1 | 99 | 99 | 99 |
| 4  | 1  | 4  | 1  | 1 | 4  | 4  | 4  |
| 2  | 2  | 2  | 4  | 4 | 4  | 2  | 4  |
| 3  | 1  | 1  | 1  | 1 | 2  | 3  | 4  |
| 3  | 1  | 4  | 1  | 1 | 2  | 3  | 4  |
| 3  | 1  | 4  | 1  | 1 | 4  | 4  | 4  |
| 3  | 2  | 2  | 2  | 2 | 4  | 4  | 4  |
| 4  | 4  | 4  | 1  | 1 | 1  | 1  | 1  |
| 1  | 4  | 1  | 4  | 2 | 4  | 3  | 2  |
| 4  | 3  | 4  | 2  | 1 | 4  | 4  | 4  |
| 4  | 1  | 4  | 1  | 1 | 4  | 4  | 4  |
| 99 | 99 | 99 | 99 | 1 | 4  | 4  | 4  |
| 3  | 2  | 3  | 2  | 1 | 4  | 4  | 3  |
| 2  | 2  | 4  | 2  | 1 | 3  | 2  | 3  |
| 4  | 2  | 3  | 2  | 1 | 4  | 4  | 4  |
| 3  | 1  | 4  | 1  | 1 | 3  | 3  | 3  |
| 3  | 2  | 3  | 2  | 1 | 3  | 3  | 2  |
| 3  | 2  | 3  | 2  | 2 | 3  | 3  | 99 |
| 4  | 1  | 4  | 1  | 1 | 4  | 4  | 4  |

|    |    |    |    |    |   |   |   |
|----|----|----|----|----|---|---|---|
| 3  | 2  | 4  | 2  | 1  | 4 | 4 | 3 |
| 4  | 1  | 2  | 1  | 1  | 4 | 4 | 4 |
| 3  | 2  | 3  | 2  | 2  | 3 | 3 | 3 |
| 3  | 2  | 4  | 1  | 1  | 4 | 4 | 4 |
| 4  | 1  | 4  | 3  | 1  | 3 | 3 | 3 |
| 3  | 2  | 3  | 2  | 2  | 3 | 3 | 2 |
| 99 | 1  | 4  | 1  | 1  | 4 | 4 | 3 |
| 2  | 3  | 3  | 2  | 2  | 4 | 3 | 3 |
| 2  | 3  | 2  | 3  | 3  | 2 | 2 | 2 |
| 4  | 2  | 4  | 2  | 1  | 3 | 4 | 2 |
| 1  | 3  | 4  | 4  | 1  | 4 | 4 | 4 |
| 3  | 1  | 3  | 2  | 1  | 4 | 4 | 4 |
| 3  | 2  | 3  | 2  | 2  | 3 | 3 | 3 |
| 2  | 3  | 2  | 3  | 3  | 3 | 2 | 4 |
| 3  | 3  | 3  | 2  | 2  | 2 | 2 | 3 |
| 3  | 2  | 3  | 2  | 2  | 3 | 4 | 3 |
| 4  | 3  | 4  | 2  | 1  | 3 | 3 | 2 |
| 4  | 2  | 4  | 1  | 1  | 2 | 2 | 3 |
| 2  | 2  | 4  | 2  | 2  | 3 | 4 | 4 |
| 2  | 2  | 3  | 2  | 1  | 2 | 2 | 3 |
| 3  | 3  | 3  | 3  | 2  | 3 | 3 | 2 |
| 4  | 1  | 1  | 1  | 1  | 4 | 4 | 4 |
| 4  | 1  | 4  | 1  | 1  | 4 | 4 | 4 |
| 4  | 1  | 4  | 2  | 1  | 2 | 2 | 2 |
| 3  | 1  | 3  | 1  | 1  | 1 | 1 | 1 |
| 3  | 1  | 3  | 1  | 1  | 3 | 3 | 3 |
| 3  | 3  | 3  | 3  | 1  | 3 | 3 | 4 |
| 4  | 1  | 4  | 1  | 1  | 4 | 4 | 4 |
| 4  | 1  | 4  | 1  | 1  | 4 | 4 | 4 |
| 3  | 2  | 3  | 1  | 1  | 3 | 3 | 3 |
| 3  | 2  | 3  | 2  | 2  | 4 | 4 | 4 |
| 2  | 3  | 3  | 3  | 2  | 3 | 3 | 3 |
| 3  | 2  | 3  | 2  | 1  | 3 | 3 | 3 |
| 2  | 3  | 3  | 2  | 1  | 2 | 3 | 3 |
| 2  | 1  | 3  | 2  | 1  | 3 | 4 | 4 |
| 99 | 99 | 2  | 99 | 99 | 4 | 4 | 4 |
| 4  | 1  | 4  | 1  | 1  | 4 | 4 | 4 |
| 3  | 2  | 3  | 2  | 2  | 3 | 3 | 3 |
| 4  | 1  | 4  | 1  | 1  | 4 | 4 | 4 |
| 3  | 3  | 3  | 99 | 2  | 4 | 4 | 2 |
| 3  | 2  | 3  | 2  | 2  | 3 | 3 | 3 |
| 1  | 2  | 2  | 2  | 2  | 3 | 4 | 3 |
| 2  | 3  | 2  | 3  | 3  | 3 | 2 | 3 |
| 2  | 2  | 99 | 2  | 2  | 3 | 3 | 2 |
| 99 | 99 | 99 | 99 | 99 | 2 | 3 | 4 |
| 2  | 3  | 2  | 2  | 2  | 4 | 4 | 4 |
| 3  | 3  | 3  | 2  | 2  | 3 | 3 | 3 |
| 3  | 2  | 3  | 2  | 1  | 4 | 4 | 3 |

|    |    |    |    |    |    |    |    |
|----|----|----|----|----|----|----|----|
| 2  | 2  | 2  | 2  | 2  | 2  | 2  | 2  |
| 3  | 99 | 3  | 2  | 2  | 1  | 1  | 99 |
| 3  | 1  | 99 | 1  | 1  | 99 | 99 | 99 |
| 2  | 2  | 2  | 1  | 1  | 3  | 4  | 3  |
| 3  | 2  | 4  | 2  | 1  | 4  | 4  | 1  |
| 4  | 3  | 3  | 2  | 1  | 3  | 3  | 3  |
| 99 | 2  | 3  | 2  | 1  | 99 | 99 | 99 |
| 4  | 2  | 2  | 1  | 1  | 99 | 2  | 2  |
| 4  | 2  | 3  | 2  | 1  | 4  | 4  | 4  |
| 2  | 2  | 2  | 1  | 2  | 3  | 4  | 3  |
| 99 | 99 | 99 | 99 | 99 | 4  | 4  | 4  |
| 4  | 1  | 4  | 1  | 1  | 99 | 3  | 99 |
| 3  | 1  | 1  | 1  | 1  | 3  | 3  | 3  |
| 4  | 1  | 4  | 1  | 1  | 1  | 4  | 4  |
| 2  | 1  | 4  | 2  | 1  | 4  | 4  | 4  |
| 4  | 1  | 4  | 1  | 1  | 4  | 4  | 4  |
| 2  | 2  | 2  | 2  | 1  | 3  | 3  | 2  |
| 4  | 3  | 1  | 1  | 1  | 4  | 4  | 4  |
| 4  | 2  | 4  | 2  | 1  | 2  | 2  | 2  |
| 4  | 1  | 4  | 1  | 1  | 4  | 4  | 4  |
| 1  | 2  | 4  | 1  | 1  | 4  | 4  | 4  |
| 3  | 99 | 3  | 99 | 99 | 99 | 99 | 4  |
| 4  | 1  | 4  | 2  | 1  | 3  | 3  | 4  |
| 3  | 2  | 3  | 2  | 2  | 2  | 3  | 3  |
| 3  | 3  | 3  | 3  | 1  | 4  | 4  | 3  |
| 4  | 1  | 4  | 1  | 1  | 3  | 3  | 3  |
| 4  | 2  | 4  | 2  | 2  | 3  | 3  | 2  |
| 1  | 3  | 3  | 3  | 2  | 3  | 3  | 2  |
| 4  | 1  | 4  | 1  | 1  | 4  | 4  | 4  |
| 4  | 1  | 4  | 1  | 1  | 4  | 4  | 4  |
| 4  | 2  | 4  | 2  | 1  | 2  | 2  | 2  |
| 3  | 3  | 4  | 2  | 1  | 3  | 3  | 4  |
| 3  | 2  | 99 | 99 | 2  | 3  | 3  | 3  |
| 99 | 99 | 3  | 3  | 2  | 4  | 3  | 3  |
| 4  | 1  | 1  | 1  | 1  | 3  | 4  | 1  |
| 99 | 1  | 99 | 1  | 1  | 3  | 3  | 4  |
| 4  | 1  | 4  | 1  | 1  | 4  | 4  | 4  |
| 2  | 1  | 3  | 1  | 2  | 2  | 3  | 4  |
| 4  | 1  | 4  | 1  | 1  | 3  | 3  | 2  |
| 4  | 2  | 3  | 2  | 1  | 4  | 4  | 3  |
| 2  | 2  | 3  | 2  | 1  | 1  | 1  | 1  |
| 2  | 2  | 3  | 3  | 1  | 3  | 3  | 2  |
| 2  | 2  | 2  | 2  | 2  | 3  | 2  | 3  |
| 3  | 2  | 4  | 2  | 2  | 3  | 3  | 3  |
| 2  | 2  | 4  | 1  | 1  | 3  | 4  | 3  |
| 4  | 1  | 4  | 1  | 1  | 3  | 4  | 4  |
| 3  | 2  | 3  | 2  | 1  | 4  | 4  | 4  |
| 2  | 3  | 3  | 4  | 4  | 2  | 2  | 4  |

|    |    |    |    |    |    |    |    |
|----|----|----|----|----|----|----|----|
| 3  | 2  | 99 | 2  | 2  | 3  | 2  | 3  |
| 4  | 1  | 4  | 1  | 1  | 4  | 4  | 4  |
| 3  | 1  | 3  | 1  | 1  | 2  | 3  | 4  |
| 2  | 2  | 3  | 3  | 99 | 3  | 3  | 99 |
| 99 | 1  | 4  | 1  | 1  | 2  | 2  | 99 |
| 4  | 2  | 1  | 4  | 1  | 4  | 4  | 4  |
| 3  | 2  | 3  | 2  | 2  | 3  | 3  | 3  |
| 3  | 2  | 3  | 2  | 2  | 4  | 4  | 4  |
| 3  | 2  | 3  | 2  | 2  | 4  | 4  | 4  |
| 3  | 2  | 3  | 1  | 1  | 4  | 4  | 4  |
| 2  | 3  | 3  | 2  | 2  | 3  | 3  | 3  |
| 3  | 1  | 4  | 2  | 1  | 4  | 4  | 4  |
| 3  | 2  | 4  | 2  | 1  | 3  | 3  | 4  |
| 4  | 3  | 4  | 4  | 1  | 4  | 4  | 3  |
| 4  | 3  | 4  | 2  | 2  | 4  | 3  | 4  |
| 2  | 2  | 2  | 1  | 2  | 3  | 3  | 2  |
| 4  | 1  | 4  | 1  | 1  | 4  | 4  | 4  |
| 4  | 1  | 4  | 1  | 1  | 4  | 4  | 3  |
| 4  | 2  | 3  | 2  | 2  | 3  | 3  | 3  |
| 4  | 2  | 3  | 2  | 2  | 4  | 3  | 4  |
| 4  | 3  | 4  | 4  | 4  | 4  | 4  | 4  |
| 3  | 3  | 3  | 3  | 1  | 2  | 1  | 2  |
| 4  | 1  | 4  | 1  | 1  | 4  | 4  | 4  |
| 4  | 1  | 3  | 1  | 1  | 4  | 4  | 2  |
| 3  | 3  | 4  | 3  | 1  | 4  | 4  | 4  |
| 99 | 99 | 99 | 99 | 99 | 99 | 99 | 99 |
| 2  | 3  | 3  | 3  | 1  | 4  | 4  | 2  |
| 4  | 1  | 4  | 1  | 1  | 4  | 4  | 99 |
| 2  | 2  | 3  | 2  | 2  | 3  | 3  | 3  |
| 3  | 2  | 3  | 3  | 1  | 3  | 2  | 3  |
| 2  | 2  | 3  | 3  | 2  | 3  | 3  | 3  |
| 3  | 1  | 4  | 2  | 1  | 2  | 3  | 4  |
| 4  | 1  | 4  | 1  | 1  | 3  | 3  | 3  |
| 2  | 2  | 4  | 2  | 2  | 2  | 2  | 4  |
| 3  | 2  | 3  | 2  | 2  | 2  | 2  | 3  |
| 3  | 2  | 4  | 3  | 1  | 3  | 3  | 3  |
| 2  | 3  | 2  | 3  | 3  | 2  | 2  | 2  |
| 2  | 3  | 3  | 3  | 2  | 3  | 3  | 2  |
| 4  | 2  | 3  | 2  | 2  | 4  | 3  | 3  |
| 4  | 1  | 4  | 1  | 1  | 4  | 4  | 4  |
| 99 | 99 | 99 | 99 | 99 | 3  | 3  | 3  |
| 1  | 1  | 4  | 1  | 1  | 2  | 2  | 4  |
| 3  | 2  | 3  | 2  | 2  | 3  | 2  | 3  |
| 4  | 1  | 3  | 1  | 1  | 4  | 4  | 4  |
| 4  | 1  | 4  | 1  | 1  | 4  | 4  | 4  |
| 3  | 2  | 3  | 3  | 2  | 2  | 2  | 3  |
| 3  | 3  | 4  | 2  | 1  | 3  | 3  | 4  |
| 3  | 2  | 4  | 2  | 2  | 3  | 3  | 3  |



|   |    |    |   |   |   |   |    |
|---|----|----|---|---|---|---|----|
| 4 | 2  | 4  | 2 | 1 | 4 | 4 | 2  |
| 2 | 2  | 2  | 2 | 2 | 1 | 1 | 2  |
| 4 | 1  | 4  | 2 | 1 | 3 | 4 | 4  |
| 2 | 3  | 3  | 3 | 2 | 4 | 3 | 3  |
| 4 | 1  | 4  | 1 | 1 | 3 | 3 | 3  |
| 3 | 1  | 4  | 2 | 1 | 1 | 1 | 4  |
| 4 | 1  | 4  | 1 | 1 | 3 | 3 | 4  |
| 1 | 1  | 1  | 1 | 1 | 3 | 3 | 3  |
| 2 | 3  | 3  | 3 | 2 | 2 | 2 | 3  |
| 4 | 1  | 3  | 1 | 1 | 3 | 3 | 3  |
| 2 | 2  | 2  | 2 | 2 | 3 | 3 | 3  |
| 3 | 3  | 3  | 2 | 2 | 2 | 1 | 1  |
| 2 | 3  | 3  | 3 | 3 | 3 | 3 | 2  |
| 4 | 1  | 1  | 1 | 1 | 4 | 4 | 4  |
| 3 | 3  | 3  | 2 | 1 | 4 | 4 | 3  |
| 4 | 1  | 4  | 1 | 1 | 4 | 4 | 4  |
| 2 | 2  | 1  | 1 | 1 | 2 | 2 | 2  |
| 4 | 2  | 4  | 2 | 2 | 3 | 3 | 3  |
| 4 | 1  | 4  | 1 | 1 | 3 | 4 | 4  |
| 4 | 1  | 4  | 2 | 1 | 4 | 4 | 4  |
| 3 | 2  | 3  | 2 | 2 | 2 | 2 | 1  |
| 4 | 2  | 3  | 2 | 1 | 4 | 4 | 3  |
| 3 | 2  | 3  | 2 | 1 | 4 | 3 | 3  |
| 1 | 4  | 4  | 3 | 2 | 4 | 4 | 2  |
| 2 | 2  | 3  | 2 | 1 | 3 | 3 | 3  |
| 1 | 2  | 3  | 3 | 1 | 3 | 3 | 3  |
| 4 | 1  | 4  | 1 | 1 | 4 | 4 | 3  |
| 2 | 3  | 2  | 3 | 2 | 3 | 2 | 3  |
| 3 | 3  | 3  | 2 | 1 | 2 | 2 | 2  |
| 2 | 3  | 3  | 2 | 2 | 3 | 3 | 3  |
| 4 | 3  | 3  | 2 | 1 | 4 | 4 | 2  |
| 4 | 1  | 4  | 1 | 1 | 4 | 3 | 4  |
| 3 | 3  | 3  | 2 | 1 | 3 | 3 | 3  |
| 3 | 2  | 3  | 1 | 1 | 3 | 4 | 3  |
| 4 | 1  | 4  | 2 | 1 | 4 | 4 | 1  |
| 2 | 3  | 3  | 3 | 2 | 3 | 3 | 4  |
| 4 | 1  | 4  | 1 | 1 | 4 | 4 | 3  |
| 4 | 1  | 4  | 1 | 1 | 4 | 4 | 4  |
| 4 | 1  | 4  | 1 | 1 | 4 | 4 | 4  |
| 4 | 3  | 3  | 2 | 2 | 3 | 3 | 2  |
| 3 | 2  | 3  | 2 | 1 | 2 | 3 | 2  |
| 4 | 3  | 99 | 1 | 1 | 4 | 4 | 3  |
| 4 | 1  | 4  | 1 | 1 | 1 | 4 | 1  |
| 3 | 3  | 3  | 2 | 1 | 3 | 3 | 3  |
| 2 | 2  | 3  | 2 | 2 | 3 | 2 | 2  |
| 2 | 1  | 99 | 2 | 1 | 3 | 3 | 99 |
| 4 | 99 | 99 | 1 | 1 | 4 | 4 | 4  |
| 1 | 1  | 4  | 1 | 1 | 4 | 4 | 4  |

|    |    |    |    |    |    |    |    |
|----|----|----|----|----|----|----|----|
| 3  | 2  | 3  | 2  | 1  | 2  | 4  | 2  |
| 2  | 3  | 2  | 3  | 2  | 3  | 2  | 3  |
| 4  | 2  | 4  | 99 | 99 | 3  | 3  | 3  |
| 99 | 99 | 99 | 99 | 99 | 99 | 99 | 99 |
| 4  | 1  | 4  | 1  | 1  | 4  | 4  | 4  |
| 3  | 2  | 4  | 1  | 1  | 3  | 3  | 2  |
| 3  | 2  | 3  | 2  | 2  | 3  | 3  | 3  |
| 3  | 2  | 3  | 3  | 2  | 3  | 3  | 3  |
| 2  | 2  | 3  | 2  | 3  | 1  | 1  | 3  |
| 4  | 2  | 4  | 2  | 2  | 4  | 4  | 4  |
| 99 | 99 | 99 | 99 | 99 | 99 | 99 | 99 |
| 4  | 1  | 3  | 2  | 1  | 3  | 4  | 4  |
| 2  | 99 | 3  | 2  | 99 | 99 | 3  | 4  |
| 4  | 1  | 4  | 1  | 1  | 4  | 4  | 4  |
| 2  | 2  | 3  | 2  | 2  | 2  | 3  | 2  |
| 4  | 1  | 4  | 1  | 1  | 4  | 4  | 4  |
| 3  | 4  | 3  | 3  | 1  | 4  | 4  | 3  |
| 3  | 2  | 3  | 2  | 1  | 3  | 3  | 3  |
| 3  | 2  | 4  | 2  | 2  | 3  | 3  | 3  |
| 4  | 1  | 3  | 2  | 1  | 3  | 3  | 4  |
| 4  | 2  | 3  | 1  | 1  | 3  | 2  | 4  |
| 3  | 2  | 3  | 2  | 2  | 3  | 3  | 3  |
| 4  | 3  | 3  | 3  | 99 | 3  | 1  | 99 |
| 2  | 3  | 3  | 2  | 2  | 3  | 3  | 3  |
| 3  | 2  | 4  | 2  | 1  | 2  | 2  | 2  |
| 3  | 3  | 3  | 2  | 1  | 4  | 3  | 4  |
| 4  | 2  | 3  | 1  | 1  | 3  | 3  | 3  |
| 4  | 1  | 4  | 1  | 1  | 4  | 4  | 4  |
| 4  | 1  | 4  | 1  | 1  | 3  | 3  | 3  |
| 3  | 3  | 3  | 1  | 1  | 4  | 4  | 4  |
| 3  | 99 | 2  | 2  | 2  | 3  | 3  | 3  |
| 2  | 3  | 2  | 3  | 2  | 3  | 3  | 2  |
| 4  | 1  | 4  | 1  | 1  | 1  | 1  | 1  |
| 4  | 2  | 3  | 2  | 1  | 3  | 3  | 3  |
| 1  | 1  | 1  | 1  | 3  | 4  | 1  | 1  |
| 3  | 4  | 4  | 2  | 2  | 3  | 2  | 3  |
| 4  | 1  | 4  | 1  | 1  | 4  | 4  | 3  |
| 3  | 2  | 3  | 2  | 2  | 3  | 3  | 3  |
| 2  | 2  | 3  | 3  | 3  | 2  | 2  | 1  |
| 1  | 3  | 2  | 3  | 3  | 3  | 2  | 2  |
| 4  | 2  | 3  | 2  | 1  | 4  | 4  | 3  |
| 2  | 2  | 1  | 3  | 1  | 4  | 4  | 3  |
| 4  | 1  | 4  | 1  | 1  | 4  | 4  | 4  |
| 1  | 4  | 1  | 4  | 4  | 4  | 2  | 2  |
| 2  | 3  | 3  | 3  | 3  | 3  | 3  | 3  |
| 3  | 3  | 2  | 2  | 2  | 4  | 3  | 4  |
| 99 | 2  | 3  | 2  | 2  | 3  | 3  | 4  |
| 3  | 99 | 3  | 2  | 2  | 3  | 3  | 3  |

|    |    |    |    |    |    |    |    |
|----|----|----|----|----|----|----|----|
| 99 | 99 | 99 | 99 | 99 | 99 | 99 | 99 |
| 3  | 3  | 3  | 3  | 1  | 3  | 3  | 3  |
| 4  | 1  | 4  | 1  | 1  | 4  | 4  | 4  |
| 3  | 2  | 2  | 2  | 1  | 2  | 3  | 2  |
| 4  | 1  | 4  | 1  | 1  | 3  | 4  | 4  |
| 2  | 2  | 2  | 2  | 2  | 3  | 3  | 3  |
| 3  | 2  | 3  | 1  | 1  | 4  | 4  | 4  |
| 4  | 1  | 4  | 1  | 1  | 99 | 99 | 4  |
| 2  | 3  | 3  | 2  | 1  | 3  | 3  | 3  |
| 4  | 2  | 4  | 1  | 2  | 1  | 2  | 1  |
| 99 | 99 | 99 | 99 | 99 | 99 | 99 | 99 |
| 99 | 99 | 99 | 99 | 99 | 99 | 99 | 99 |
| 2  | 3  | 99 | 99 | 1  | 3  | 99 | 3  |
| 1  | 1  | 4  | 1  | 1  | 4  | 4  | 4  |
| 4  | 2  | 4  | 1  | 2  | 4  | 4  | 3  |
| 99 | 2  | 3  | 99 | 99 | 4  | 3  | 4  |
| 99 | 99 | 99 | 99 | 99 | 99 | 99 | 99 |
| 99 | 2  | 4  | 99 | 1  | 4  | 4  | 4  |
| 3  | 2  | 3  | 2  | 2  | 3  | 3  | 3  |
| 3  | 2  | 4  | 2  | 1  | 2  | 2  | 3  |
| 3  | 2  | 4  | 2  | 1  | 4  | 4  | 2  |
| 3  | 2  | 4  | 1  | 1  | 4  | 4  | 4  |
| 4  | 2  | 3  | 1  | 2  | 4  | 4  | 4  |
| 2  | 1  | 3  | 2  | 1  | 4  | 4  | 4  |
| 3  | 2  | 3  | 2  | 2  | 2  | 3  | 3  |
| 2  | 3  | 3  | 2  | 2  | 3  | 3  | 3  |
| 99 | 99 | 99 | 3  | 99 | 99 | 99 | 99 |
| 2  | 3  | 2  | 3  | 2  | 2  | 3  | 2  |
| 3  | 2  | 3  | 2  | 2  | 3  | 3  | 3  |
| 3  | 99 | 2  | 2  | 1  | 3  | 3  | 3  |
| 4  | 2  | 2  | 2  | 1  | 2  | 3  | 3  |
| 4  | 99 | 1  | 1  | 1  | 3  | 3  | 99 |
| 4  | 3  | 4  | 3  | 2  | 3  | 4  | 3  |
| 3  | 2  | 3  | 2  | 1  | 4  | 4  | 4  |
| 4  | 1  | 99 | 3  | 1  | 4  | 4  | 1  |
| 3  | 2  | 3  | 3  | 1  | 4  | 4  | 3  |
| 4  | 1  | 4  | 1  | 1  | 3  | 4  | 3  |
| 4  | 1  | 4  | 1  | 1  | 4  | 4  | 4  |
| 4  | 1  | 4  | 1  | 1  | 4  | 4  | 4  |
| 4  | 1  | 4  | 1  | 1  | 3  | 3  | 3  |
| 3  | 3  | 3  | 3  | 2  | 3  | 3  | 3  |
| 3  | 2  | 3  | 2  | 1  | 4  | 4  | 4  |
| 4  | 99 | 4  | 99 | 1  | 99 | 99 | 99 |
| 3  | 2  | 3  | 2  | 1  | 3  | 4  | 3  |
| 2  | 2  | 2  | 2  | 2  | 3  | 3  | 2  |
| 4  | 2  | 3  | 1  | 1  | 4  | 4  | 3  |
| 1  | 1  | 4  | 1  | 1  | 4  | 4  | 4  |
| 4  | 2  | 4  | 1  | 1  | 4  | 4  | 2  |

|    |    |    |    |    |    |    |    |
|----|----|----|----|----|----|----|----|
| 1  | 4  | 4  | 1  | 1  | 4  | 4  | 4  |
| 4  | 1  | 3  | 2  | 1  | 2  | 3  | 3  |
| 3  | 2  | 3  | 2  | 2  | 3  | 3  | 3  |
| 3  | 1  | 3  | 1  | 1  | 4  | 4  | 4  |
| 4  | 1  | 4  | 1  | 1  | 4  | 4  | 4  |
| 3  | 3  | 2  | 2  | 1  | 3  | 3  | 2  |
| 2  | 2  | 3  | 2  | 2  | 3  | 3  | 2  |
| 4  | 2  | 4  | 2  | 1  | 3  | 4  | 3  |
| 4  | 4  | 4  | 1  | 1  | 4  | 4  | 4  |
| 2  | 3  | 2  | 3  | 2  | 2  | 2  | 2  |
| 3  | 3  | 3  | 2  | 2  | 2  | 2  | 2  |
| 3  | 3  | 3  | 2  | 2  | 2  | 2  | 2  |
| 3  | 2  | 2  | 2  | 1  | 2  | 1  | 2  |
| 4  | 1  | 99 | 2  | 1  | 4  | 4  | 4  |
| 4  | 2  | 4  | 1  | 1  | 2  | 3  | 3  |
| 3  | 3  | 3  | 1  | 1  | 3  | 3  | 3  |
| 4  | 1  | 4  | 2  | 1  | 3  | 3  | 1  |
| 1  | 1  | 4  | 2  | 1  | 3  | 3  | 4  |
| 2  | 3  | 2  | 3  | 2  | 3  | 3  | 3  |
| 4  | 1  | 4  | 1  | 1  | 4  | 4  | 4  |
| 3  | 2  | 3  | 2  | 1  | 4  | 4  | 2  |
| 4  | 1  | 4  | 1  | 1  | 4  | 4  | 4  |
| 3  | 3  | 4  | 1  | 1  | 4  | 3  | 2  |
| 99 | 99 | 99 | 99 | 99 | 99 | 99 | 99 |
| 3  | 3  | 3  | 2  | 2  | 3  | 3  | 3  |
| 3  | 2  | 4  | 2  | 1  | 4  | 3  | 4  |
| 4  | 2  | 4  | 2  | 1  | 4  | 4  | 3  |
| 3  | 2  | 3  | 1  | 1  | 3  | 4  | 3  |
| 1  | 3  | 2  | 4  | 4  | 1  | 1  | 1  |
| 4  | 1  | 4  | 2  | 1  | 2  | 3  | 3  |
| 3  | 99 | 3  | 2  | 2  | 3  | 3  | 99 |
| 99 | 99 | 99 | 99 | 99 | 99 | 99 | 99 |
| 3  | 99 | 3  | 1  | 2  | 3  | 4  | 3  |
| 4  | 2  | 3  | 2  | 1  | 4  | 4  | 4  |
| 2  | 3  | 3  | 3  | 2  | 3  | 3  | 3  |
| 3  | 2  | 3  | 2  | 2  | 3  | 2  | 2  |
| 3  | 3  | 2  | 2  | 2  | 3  | 3  | 3  |
| 3  | 1  | 1  | 1  | 1  | 4  | 4  | 4  |
| 3  | 2  | 3  | 2  | 2  | 3  | 3  | 3  |
| 3  | 2  | 3  | 1  | 2  | 3  | 3  | 2  |
| 3  | 2  | 3  | 3  | 2  | 2  | 2  | 2  |
| 1  | 1  | 1  | 1  | 1  | 2  | 2  | 3  |
| 99 | 99 | 3  | 2  | 2  | 3  | 3  | 2  |
| 4  | 2  | 3  | 1  | 1  | 3  | 3  | 4  |
| 99 | 3  | 99 | 99 | 2  | 99 | 99 | 99 |
| 4  | 4  | 4  | 1  | 1  | 4  | 4  | 4  |
| 2  | 3  | 4  | 1  | 1  | 2  | 2  | 4  |
| 3  | 1  | 4  | 2  | 1  | 3  | 4  | 4  |

|    |    |    |    |    |    |    |    |
|----|----|----|----|----|----|----|----|
| 3  | 2  | 4  | 2  | 2  | 4  | 4  | 4  |
| 4  | 1  | 4  | 1  | 1  | 4  | 4  | 4  |
| 3  | 2  | 3  | 3  | 1  | 4  | 4  | 4  |
| 2  | 2  | 2  | 2  | 2  | 3  | 3  | 3  |
| 4  | 2  | 4  | 1  | 2  | 4  | 4  | 4  |
| 2  | 3  | 2  | 2  | 2  | 3  | 3  | 2  |
| 4  | 1  | 4  | 1  | 1  | 4  | 4  | 1  |
| 4  | 1  | 4  | 1  | 1  | 4  | 4  | 4  |
| 3  | 2  | 4  | 1  | 2  | 3  | 3  | 3  |
| 3  | 3  | 3  | 2  | 2  | 3  | 3  | 3  |
| 2  | 3  | 2  | 3  | 3  | 3  | 3  | 3  |
| 3  | 3  | 2  | 3  | 1  | 3  | 3  | 3  |
| 2  | 1  | 4  | 3  | 2  | 3  | 2  | 3  |
| 99 | 99 | 99 | 99 | 99 | 99 | 99 | 99 |
| 99 | 99 | 3  | 99 | 99 | 2  | 2  | 2  |
| 3  | 2  | 4  | 1  | 1  | 4  | 4  | 4  |
| 2  | 99 | 3  | 2  | 3  | 4  | 4  | 3  |
| 1  | 3  | 1  | 3  | 4  | 4  | 3  | 3  |
| 1  | 4  | 4  | 4  | 3  | 4  | 1  | 2  |
| 3  | 2  | 3  | 2  | 2  | 2  | 3  | 3  |
| 2  | 2  | 2  | 2  | 2  | 3  | 3  | 3  |
| 3  | 2  | 4  | 1  | 1  | 4  | 4  | 4  |
| 4  | 2  | 4  | 2  | 2  | 4  | 4  | 4  |
| 4  | 2  | 3  | 2  | 1  | 4  | 4  | 3  |
| 4  | 2  | 4  | 2  | 1  | 2  | 2  | 3  |
| 3  | 2  | 3  | 99 | 2  | 3  | 3  | 3  |
| 2  | 3  | 3  | 3  | 2  | 3  | 3  | 3  |
| 4  | 2  | 4  | 1  | 1  | 4  | 4  | 3  |
| 2  | 1  | 3  | 1  | 1  | 3  | 4  | 4  |
| 3  | 2  | 2  | 2  | 2  | 4  | 4  | 3  |
| 3  | 3  | 3  | 3  | 1  | 3  | 3  | 4  |
| 3  | 99 | 4  | 99 | 99 | 4  | 4  | 4  |
| 3  | 2  | 1  | 2  | 1  | 3  | 3  | 4  |
| 4  | 3  | 3  | 3  | 3  | 4  | 3  | 2  |
| 4  | 1  | 4  | 1  | 1  | 4  | 4  | 4  |
| 4  | 1  | 1  | 1  | 1  | 2  | 2  | 2  |
| 2  | 2  | 2  | 2  | 2  | 3  | 3  | 3  |
| 4  | 1  | 3  | 2  | 1  | 3  | 4  | 3  |
| 4  | 1  | 4  | 2  | 1  | 3  | 3  | 3  |
| 2  | 2  | 3  | 2  | 2  | 2  | 2  | 3  |
| 3  | 2  | 3  | 2  | 1  | 4  | 3  | 3  |
| 3  | 1  | 2  | 2  | 1  | 2  | 2  | 2  |
| 2  | 1  | 4  | 1  | 1  | 2  | 3  | 3  |
| 3  | 2  | 3  | 2  | 1  | 2  | 2  | 2  |
| 2  | 3  | 3  | 2  | 2  | 3  | 3  | 3  |
| 4  | 4  | 4  | 1  | 1  | 4  | 4  | 4  |
| 3  | 2  | 4  | 1  | 1  | 4  | 3  | 3  |
| 3  | 2  | 3  | 2  | 1  | 4  | 4  | 4  |

|    |    |    |    |    |    |    |    |
|----|----|----|----|----|----|----|----|
| 2  | 2  | 2  | 99 | 2  | 2  | 2  | 2  |
| 3  | 2  | 3  | 2  | 2  | 3  | 3  | 2  |
| 2  | 3  | 3  | 3  | 1  | 4  | 4  | 1  |
| 1  | 2  | 1  | 2  | 2  | 4  | 4  | 4  |
| 99 | 3  | 3  | 3  | 3  | 2  | 3  | 2  |
| 3  | 2  | 2  | 2  | 2  | 3  | 3  | 2  |
| 3  | 3  | 4  | 2  | 1  | 1  | 2  | 2  |
| 1  | 4  | 1  | 4  | 2  | 2  | 1  | 3  |
| 4  | 2  | 4  | 1  | 1  | 3  | 3  | 4  |
| 3  | 2  | 3  | 2  | 1  | 3  | 3  | 99 |
| 2  | 2  | 3  | 99 | 2  | 2  | 2  | 3  |
| 4  | 1  | 3  | 1  | 1  | 4  | 4  | 4  |
| 4  | 1  | 4  | 1  | 1  | 4  | 4  | 4  |
| 4  | 1  | 4  | 1  | 1  | 4  | 4  | 2  |
| 99 | 99 | 4  | 1  | 1  | 2  | 99 | 99 |
| 4  | 2  | 4  | 2  | 1  | 2  | 2  | 3  |
| 2  | 3  | 3  | 3  | 2  | 4  | 4  | 4  |
| 4  | 2  | 3  | 3  | 1  | 4  | 4  | 4  |
| 3  | 2  | 3  | 2  | 1  | 3  | 3  | 2  |
| 99 | 99 | 99 | 99 | 99 | 99 | 99 | 99 |
| 3  | 3  | 2  | 3  | 2  | 3  | 3  | 3  |
| 3  | 2  | 3  | 3  | 1  | 4  | 3  | 3  |
| 2  | 3  | 3  | 3  | 1  | 3  | 3  | 4  |
| 2  | 2  | 4  | 2  | 1  | 4  | 4  | 4  |
| 3  | 2  | 2  | 2  | 2  | 2  | 1  | 2  |
| 3  | 1  | 3  | 3  | 1  | 3  | 3  | 3  |
| 2  | 2  | 3  | 2  | 2  | 3  | 2  | 2  |
| 4  | 2  | 3  | 2  | 1  | 3  | 3  | 3  |
| 4  | 1  | 3  | 1  | 1  | 2  | 1  | 3  |
| 2  | 1  | 3  | 1  | 1  | 3  | 3  | 3  |
| 3  | 2  | 3  | 2  | 1  | 1  | 3  | 3  |
| 4  | 1  | 4  | 1  | 1  | 1  | 1  | 1  |
| 3  | 2  | 4  | 2  | 1  | 3  | 4  | 4  |
| 2  | 2  | 3  | 2  | 2  | 3  | 4  | 4  |
| 99 | 3  | 1  | 3  | 3  | 4  | 4  | 4  |
| 3  | 1  | 3  | 1  | 1  | 4  | 4  | 4  |
| 3  | 2  | 3  | 2  | 2  | 4  | 4  | 4  |
| 3  | 2  | 3  | 1  | 1  | 3  | 2  | 3  |
| 3  | 2  | 99 | 1  | 99 | 4  | 3  | 4  |
| 3  | 3  | 4  | 2  | 1  | 3  | 3  | 4  |
| 3  | 1  | 3  | 1  | 1  | 3  | 3  | 3  |
| 3  | 2  | 99 | 2  | 2  | 4  | 4  | 99 |
| 3  | 2  | 3  | 2  | 2  | 2  | 3  | 3  |
| 2  | 3  | 3  | 3  | 2  | 3  | 3  | 3  |
| 3  | 2  | 4  | 2  | 1  | 2  | 2  | 3  |
| 3  | 1  | 3  | 1  | 1  | 3  | 3  | 3  |
| 99 | 99 | 99 | 99 | 2  | 99 | 99 | 99 |
| 1  | 2  | 3  | 3  | 2  | 3  | 1  | 2  |

|    |    |    |    |   |   |    |    |
|----|----|----|----|---|---|----|----|
| 4  | 1  | 4  | 1  | 1 | 3 | 4  | 4  |
| 3  | 3  | 3  | 3  | 2 | 3 | 3  | 2  |
| 3  | 3  | 3  | 2  | 1 | 2 | 2  | 2  |
| 2  | 3  | 3  | 3  | 2 | 3 | 3  | 3  |
| 4  | 1  | 4  | 1  | 1 | 4 | 4  | 4  |
| 2  | 4  | 3  | 4  | 2 | 3 | 3  | 2  |
| 1  | 99 | 99 | 1  | 1 | 4 | 4  | 3  |
| 1  | 2  | 2  | 2  | 1 | 3 | 3  | 3  |
| 4  | 1  | 4  | 1  | 1 | 1 | 1  | 1  |
| 1  | 4  | 1  | 4  | 2 | 4 | 4  | 99 |
| 2  | 4  | 1  | 4  | 4 | 4 | 3  | 2  |
| 2  | 1  | 4  | 1  | 1 | 4 | 4  | 4  |
| 2  | 4  | 3  | 4  | 1 | 3 | 4  | 3  |
| 3  | 2  | 4  | 1  | 1 | 3 | 3  | 3  |
| 4  | 2  | 4  | 2  | 1 | 4 | 4  | 4  |
| 99 | 2  | 3  | 2  | 2 | 4 | 4  | 3  |
| 1  | 4  | 1  | 4  | 2 | 4 | 4  | 4  |
| 3  | 1  | 4  | 1  | 1 | 3 | 3  | 4  |
| 4  | 1  | 4  | 1  | 1 | 4 | 4  | 4  |
| 99 | 3  | 3  | 99 | 2 | 2 | 99 | 3  |
| 3  | 1  | 4  | 1  | 1 | 4 | 4  | 99 |
| 3  | 2  | 3  | 2  | 2 | 3 | 3  | 3  |
| 3  | 3  | 4  | 2  | 2 | 4 | 4  | 4  |
| 3  | 2  | 3  | 2  | 1 | 3 | 3  | 99 |
| 4  | 1  | 3  | 1  | 2 | 4 | 4  | 4  |
| 2  | 3  | 3  | 3  | 2 | 3 | 3  | 3  |
| 4  | 2  | 4  | 1  | 1 | 2 | 2  | 3  |
| 3  | 2  | 2  | 2  | 2 | 3 | 3  | 2  |
| 3  | 1  | 4  | 1  | 1 | 4 | 4  | 4  |
| 3  | 2  | 3  | 2  | 2 | 3 | 3  | 3  |
| 4  | 2  | 4  | 2  | 1 | 4 | 4  | 4  |
| 4  | 2  | 4  | 2  | 1 | 4 | 4  | 3  |
| 3  | 2  | 4  | 2  | 1 | 1 | 4  | 4  |
| 3  | 2  | 3  | 2  | 2 | 3 | 3  | 3  |
| 4  | 1  | 4  | 1  | 1 | 4 | 4  | 4  |
| 1  | 4  | 1  | 4  | 4 | 3 | 4  | 1  |
| 3  | 1  | 4  | 1  | 1 | 3 | 3  | 4  |
| 2  | 2  | 4  | 1  | 2 | 4 | 4  | 4  |
| 4  | 1  | 4  | 1  | 1 | 4 | 4  | 4  |
| 4  | 4  | 1  | 4  | 1 | 4 | 4  | 4  |
| 4  | 2  | 4  | 1  | 1 | 3 | 3  | 3  |
| 1  | 4  | 1  | 4  | 4 | 1 | 1  | 1  |
| 3  | 2  | 4  | 2  | 1 | 4 | 4  | 4  |
| 3  | 2  | 4  | 2  | 1 | 2 | 3  | 4  |
| 3  | 3  | 4  | 3  | 2 | 3 | 2  | 4  |
| 4  | 1  | 4  | 1  | 1 | 4 | 4  | 4  |
| 3  | 1  | 3  | 1  | 1 | 3 | 2  | 3  |
| 3  | 3  | 3  | 2  | 2 | 2 | 4  | 3  |

|    |    |    |    |    |    |    |    |
|----|----|----|----|----|----|----|----|
| 2  | 2  | 2  | 2  | 2  | 4  | 4  | 4  |
| 4  | 1  | 4  | 1  | 1  | 3  | 3  | 3  |
| 4  | 1  | 4  | 99 | 99 | 4  | 4  | 4  |
| 4  | 1  | 4  | 1  | 1  | 4  | 4  | 4  |
| 4  | 1  | 4  | 1  | 1  | 4  | 4  | 4  |
| 4  | 1  | 4  | 1  | 1  | 3  | 3  | 4  |
| 4  | 1  | 3  | 99 | 1  | 2  | 1  | 99 |
| 4  | 2  | 4  | 1  | 1  | 99 | 99 | 1  |
| 1  | 2  | 3  | 4  | 3  | 2  | 4  | 4  |
| 2  | 2  | 3  | 3  | 2  | 2  | 3  | 3  |
| 3  | 2  | 3  | 2  | 2  | 2  | 3  | 2  |
| 99 | 99 | 99 | 99 | 99 | 99 | 99 | 4  |
| 4  | 1  | 4  | 1  | 1  | 4  | 4  | 3  |
| 2  | 2  | 3  | 2  | 1  | 2  | 3  | 3  |
| 2  | 3  | 4  | 1  | 1  | 1  | 1  | 3  |
| 99 | 99 | 99 | 99 | 99 | 99 | 99 | 99 |
| 4  | 1  | 4  | 1  | 1  | 4  | 4  | 4  |
| 4  | 1  | 4  | 1  | 1  | 4  | 3  | 3  |
| 4  | 2  | 99 | 1  | 1  | 99 | 99 | 3  |
| 4  | 1  | 4  | 1  | 1  | 4  | 4  | 4  |
| 4  | 2  | 4  | 2  | 2  | 4  | 4  | 4  |
| 3  | 3  | 3  | 3  | 2  | 2  | 2  | 3  |
| 2  | 3  | 3  | 3  | 2  | 2  | 2  | 3  |
| 4  | 1  | 4  | 1  | 1  | 3  | 99 | 3  |
| 4  | 99 | 4  | 1  | 1  | 4  | 4  | 4  |
| 99 | 99 | 99 | 99 | 99 | 4  | 4  | 4  |
| 4  | 1  | 3  | 1  | 1  | 3  | 3  | 3  |
| 3  | 2  | 3  | 2  | 1  | 3  | 3  | 3  |
| 3  | 1  | 4  | 2  | 2  | 4  | 4  | 3  |
| 4  | 2  | 3  | 1  | 1  | 3  | 3  | 4  |
| 2  | 99 | 3  | 2  | 2  | 3  | 2  | 3  |
| 2  | 3  | 3  | 3  | 1  | 3  | 3  | 4  |
| 3  | 1  | 4  | 1  | 1  | 99 | 99 | 99 |
| 3  | 3  | 4  | 3  | 2  | 2  | 3  | 2  |
| 3  | 2  | 3  | 2  | 2  | 3  | 3  | 3  |
| 3  | 3  | 3  | 2  | 2  | 3  | 3  | 3  |
| 99 | 99 | 99 | 99 | 99 | 99 | 99 | 99 |
| 3  | 2  | 2  | 2  | 2  | 3  | 3  | 3  |
| 3  | 2  | 3  | 2  | 1  | 2  | 2  | 3  |
| 4  | 1  | 4  | 1  | 1  | 1  | 1  | 4  |
| 4  | 1  | 4  | 1  | 1  | 4  | 4  | 1  |
| 4  | 2  | 4  | 1  | 1  | 1  | 1  | 3  |
| 2  | 2  | 3  | 2  | 1  | 2  | 2  | 3  |
| 4  | 1  | 4  | 1  | 1  | 4  | 4  | 4  |
| 3  | 2  | 4  | 2  | 2  | 2  | 2  | 2  |
| 2  | 1  | 3  | 3  | 2  | 3  | 2  | 3  |
| 4  | 1  | 4  | 2  | 1  | 4  | 4  | 4  |
| 3  | 2  | 3  | 2  | 2  | 4  | 4  | 3  |



|    |    |    |    |    |   |   |   |
|----|----|----|----|----|---|---|---|
| 2  | 2  | 3  | 3  | 3  | 3 | 4 | 4 |
| 4  | 2  | 4  | 2  | 1  | 4 | 4 | 4 |
| 2  | 3  | 3  | 4  | 2  | 2 | 2 | 2 |
| 4  | 1  | 4  | 1  | 1  | 4 | 4 | 4 |
| 3  | 2  | 3  | 2  | 2  | 2 | 2 | 2 |
| 3  | 2  | 4  | 2  | 1  | 3 | 4 | 4 |
| 2  | 3  | 3  | 3  | 3  | 3 | 3 | 3 |
| 4  | 2  | 4  | 2  | 1  | 3 | 4 | 3 |
| 2  | 3  | 3  | 3  | 2  | 3 | 3 | 3 |
| 3  | 2  | 3  | 1  | 1  | 3 | 3 | 3 |
| 4  | 1  | 4  | 1  | 1  | 3 | 4 | 3 |
| 3  | 2  | 3  | 2  | 2  | 3 | 3 | 3 |
| 3  | 99 | 3  | 2  | 1  | 2 | 2 | 3 |
| 3  | 2  | 3  | 2  | 1  | 4 | 4 | 3 |
| 2  | 3  | 3  | 3  | 3  | 1 | 1 | 1 |
| 4  | 1  | 4  | 2  | 1  | 2 | 3 | 3 |
| 4  | 1  | 4  | 1  | 1  | 4 | 4 | 4 |
| 4  | 2  | 4  | 1  | 1  | 4 | 3 | 2 |
| 4  | 2  | 3  | 2  | 2  | 2 | 2 | 3 |
| 3  | 2  | 3  | 2  | 2  | 3 | 2 | 2 |
| 3  | 2  | 3  | 2  | 2  | 3 | 3 | 3 |
| 4  | 1  | 3  | 1  | 1  | 4 | 4 | 3 |
| 3  | 2  | 3  | 2  | 2  | 3 | 3 | 3 |
| 4  | 2  | 4  | 2  | 1  | 4 | 4 | 3 |
| 1  | 4  | 1  | 4  | 4  | 1 | 1 | 1 |
| 2  | 1  | 3  | 2  | 1  | 4 | 4 | 4 |
| 4  | 1  | 4  | 1  | 1  | 4 | 4 | 4 |
| 2  | 2  | 2  | 2  | 2  | 3 | 3 | 3 |
| 1  | 2  | 3  | 2  | 2  | 3 | 3 | 3 |
| 3  | 2  | 3  | 2  | 2  | 2 | 3 | 3 |
| 2  | 3  | 3  | 3  | 4  | 2 | 2 | 3 |
| 99 | 99 | 99 | 99 | 99 | 3 | 3 | 3 |
| 2  | 1  | 4  | 3  | 2  | 4 | 4 | 4 |
| 2  | 3  | 3  | 3  | 3  | 4 | 4 | 4 |
| 2  | 2  | 3  | 3  | 1  | 2 | 2 | 2 |
| 3  | 3  | 3  | 3  | 3  | 4 | 4 | 4 |
| 4  | 1  | 1  | 1  | 1  | 1 | 1 | 3 |
| 3  | 1  | 4  | 1  | 1  | 4 | 4 | 4 |
| 1  | 1  | 1  | 1  | 1  | 1 | 1 | 1 |
| 3  | 2  | 3  | 3  | 1  | 1 | 1 | 3 |
| 2  | 2  | 2  | 3  | 1  | 4 | 1 | 3 |
| 1  | 3  | 2  | 3  | 4  | 4 | 3 | 4 |
| 4  | 3  | 1  | 2  | 2  | 4 | 4 | 3 |
| 3  | 2  | 4  | 2  | 2  | 2 | 2 | 3 |
| 1  | 3  | 2  | 3  | 3  | 2 | 2 | 2 |
| 2  | 2  | 2  | 3  | 3  | 4 | 4 | 4 |
| 3  | 2  | 2  | 2  | 1  | 4 | 4 | 2 |
| 2  | 2  | 2  | 2  | 1  | 3 | 3 | 4 |

|    |    |    |    |    |    |    |    |
|----|----|----|----|----|----|----|----|
| 4  | 1  | 4  | 1  | 1  | 4  | 4  | 4  |
| 4  | 2  | 3  | 2  | 2  | 3  | 3  | 3  |
| 3  | 2  | 3  | 2  | 2  | 2  | 3  | 3  |
| 4  | 2  | 3  | 2  | 1  | 4  | 3  | 3  |
| 3  | 2  | 3  | 2  | 2  | 2  | 3  | 2  |
| 4  | 2  | 3  | 1  | 1  | 2  | 2  | 3  |
| 3  | 3  | 2  | 3  | 2  | 2  | 2  | 3  |
| 99 | 99 | 99 | 2  | 1  | 3  | 3  | 3  |
| 4  | 1  | 4  | 1  | 1  | 1  | 1  | 1  |
| 4  | 3  | 3  | 3  | 1  | 4  | 4  | 4  |
| 4  | 1  | 4  | 2  | 1  | 3  | 4  | 4  |
| 4  | 1  | 4  | 1  | 1  | 4  | 4  | 4  |
| 3  | 1  | 4  | 2  | 1  | 4  | 4  | 4  |
| 3  | 2  | 4  | 2  | 1  | 4  | 4  | 4  |
| 4  | 3  | 3  | 2  | 1  | 99 | 1  | 4  |
| 3  | 1  | 4  | 1  | 1  | 3  | 4  | 3  |
| 4  | 1  | 4  | 1  | 1  | 4  | 4  | 1  |
| 3  | 1  | 4  | 2  | 1  | 4  | 4  | 3  |
| 4  | 1  | 4  | 2  | 1  | 3  | 4  | 3  |
| 4  | 1  | 1  | 1  | 1  | 2  | 2  | 1  |
| 4  | 1  | 4  | 1  | 1  | 4  | 4  | 1  |
| 3  | 2  | 4  | 2  | 1  | 3  | 2  | 2  |
| 2  | 3  | 99 | 3  | 99 | 3  | 3  | 3  |
| 4  | 1  | 4  | 1  | 1  | 2  | 99 | 4  |
| 4  | 1  | 4  | 1  | 1  | 4  | 4  | 4  |
| 4  | 2  | 4  | 1  | 1  | 1  | 1  | 99 |
| 4  | 1  | 4  | 1  | 1  | 1  | 1  | 1  |
| 4  | 2  | 4  | 1  | 1  | 3  | 4  | 3  |
| 3  | 3  | 3  | 1  | 1  | 99 | 99 | 99 |
| 4  | 1  | 4  | 1  | 1  | 4  | 4  | 4  |
| 4  | 1  | 4  | 1  | 1  | 4  | 4  | 99 |
| 3  | 2  | 3  | 2  | 2  | 3  | 3  | 3  |
| 4  | 1  | 4  | 2  | 1  | 3  | 3  | 3  |
| 4  | 1  | 4  | 1  | 1  | 4  | 4  | 4  |
| 2  | 3  | 3  | 2  | 2  | 3  | 3  | 3  |
| 4  | 1  | 4  | 1  | 1  | 3  | 3  | 3  |
| 3  | 2  | 3  | 4  | 1  | 3  | 4  | 2  |
| 3  | 2  | 3  | 1  | 1  | 3  | 3  | 2  |
| 99 | 99 | 99 | 99 | 1  | 4  | 4  | 4  |
| 3  | 1  | 3  | 2  | 1  | 3  | 3  | 2  |
| 4  | 1  | 4  | 1  | 1  | 4  | 4  | 4  |
| 99 | 99 | 99 | 99 | 1  | 2  | 2  | 4  |
| 4  | 1  | 4  | 1  | 1  | 3  | 3  | 3  |
| 3  | 3  | 4  | 2  | 1  | 3  | 3  | 4  |
| 2  | 2  | 3  | 3  | 2  | 3  | 2  | 4  |
| 4  | 2  | 4  | 1  | 1  | 3  | 4  | 3  |
| 4  | 2  | 4  | 2  | 2  | 3  | 3  | 4  |
| 4  | 1  | 4  | 1  | 1  | 99 | 99 | 99 |

|    |    |    |    |    |    |    |    |
|----|----|----|----|----|----|----|----|
| 4  | 1  | 4  | 1  | 1  | 3  | 4  | 3  |
| 4  | 1  | 4  | 1  | 1  | 4  | 4  | 4  |
| 3  | 3  | 3  | 3  | 1  | 4  | 4  | 3  |
| 4  | 1  | 4  | 1  | 1  | 4  | 4  | 4  |
| 4  | 2  | 4  | 3  | 1  | 3  | 2  | 3  |
| 99 | 99 | 99 | 99 | 99 | 99 | 99 | 99 |
| 4  | 1  | 4  | 1  | 1  | 4  | 4  | 4  |
| 3  | 2  | 4  | 3  | 1  | 3  | 3  | 3  |
| 4  | 1  | 4  | 2  | 4  | 4  | 4  | 3  |
| 2  | 2  | 3  | 3  | 1  | 1  | 1  | 2  |
| 3  | 1  | 4  | 1  | 1  | 3  | 3  | 2  |
| 3  | 2  | 3  | 2  | 1  | 3  | 3  | 3  |
| 4  | 99 | 4  | 2  | 1  | 99 | 99 | 99 |
| 3  | 2  | 3  | 2  | 2  | 3  | 3  | 3  |
| 2  | 2  | 3  | 3  | 1  | 4  | 4  | 4  |
| 2  | 2  | 2  | 2  | 2  | 3  | 3  | 3  |
| 2  | 3  | 3  | 2  | 2  | 3  | 2  | 3  |
| 2  | 3  | 4  | 2  | 1  | 4  | 4  | 4  |
| 3  | 2  | 4  | 1  | 1  | 4  | 4  | 4  |
| 3  | 2  | 3  | 3  | 1  | 3  | 3  | 3  |
| 2  | 2  | 4  | 2  | 1  | 2  | 2  | 2  |
| 2  | 2  | 3  | 1  | 1  | 3  | 3  | 3  |
| 4  | 2  | 4  | 1  | 1  | 2  | 2  | 3  |
| 4  | 2  | 4  | 3  | 1  | 3  | 3  | 3  |
| 4  | 1  | 4  | 1  | 1  | 4  | 4  | 4  |
| 2  | 2  | 2  | 2  | 2  | 2  | 2  | 2  |
| 4  | 2  | 3  | 2  | 2  | 3  | 3  | 2  |
| 3  | 99 | 3  | 2  | 2  | 4  | 2  | 4  |
| 2  | 2  | 3  | 3  | 1  | 3  | 4  | 4  |
| 3  | 2  | 4  | 99 | 2  | 2  | 2  | 3  |
| 3  | 2  | 4  | 2  | 1  | 2  | 2  | 1  |
| 2  | 2  | 3  | 2  | 1  | 3  | 2  | 2  |
| 3  | 2  | 3  | 2  | 1  | 4  | 4  | 4  |
| 3  | 1  | 3  | 2  | 1  | 99 | 99 | 99 |
| 4  | 1  | 4  | 1  | 1  | 4  | 4  | 4  |
| 4  | 1  | 4  | 1  | 1  | 3  | 4  | 2  |
| 99 | 99 | 99 | 99 | 99 | 99 | 99 | 99 |
| 4  | 1  | 4  | 1  | 1  | 1  | 1  | 1  |
| 2  | 99 | 3  | 2  | 2  | 4  | 4  | 4  |
| 4  | 1  | 4  | 1  | 1  | 4  | 4  | 3  |
| 3  | 2  | 3  | 3  | 2  | 3  | 2  | 3  |
| 3  | 1  | 4  | 1  | 1  | 3  | 3  | 4  |
| 4  | 2  | 4  | 2  | 1  | 3  | 2  | 3  |
| 1  | 1  | 1  | 1  | 1  | 1  | 1  | 1  |
| 3  | 2  | 4  | 2  | 2  | 4  | 4  | 4  |
| 4  | 1  | 4  | 1  | 1  | 4  | 4  | 4  |
| 2  | 3  | 3  | 2  | 4  | 2  | 3  | 4  |
| 3  | 2  | 3  | 2  | 2  | 3  | 3  | 2  |

|    |    |    |    |    |    |    |    |
|----|----|----|----|----|----|----|----|
| 4  | 2  | 4  | 2  | 1  | 2  | 3  | 3  |
| 3  | 2  | 3  | 2  | 1  | 3  | 3  | 3  |
| 4  | 2  | 1  | 1  | 1  | 3  | 3  | 4  |
| 3  | 2  | 3  | 1  | 1  | 3  | 3  | 99 |
| 4  | 3  | 99 | 2  | 1  | 4  | 4  | 99 |
| 3  | 2  | 4  | 2  | 1  | 99 | 3  | 2  |
| 4  | 3  | 4  | 2  | 1  | 2  | 1  | 2  |
| 3  | 2  | 3  | 2  | 1  | 4  | 3  | 2  |
| 3  | 2  | 3  | 2  | 2  | 2  | 2  | 2  |
| 4  | 1  | 1  | 1  | 1  | 2  | 2  | 2  |
| 3  | 3  | 4  | 3  | 1  | 4  | 3  | 2  |
| 4  | 1  | 4  | 1  | 1  | 3  | 3  | 3  |
| 4  | 1  | 4  | 1  | 1  | 4  | 4  | 3  |
| 4  | 1  | 4  | 1  | 1  | 4  | 4  | 3  |
| 4  | 99 | 4  | 3  | 1  | 4  | 4  | 99 |
| 4  | 1  | 4  | 1  | 1  | 4  | 4  | 1  |
| 4  | 1  | 4  | 1  | 1  | 4  | 4  | 4  |
| 4  | 1  | 4  | 1  | 1  | 3  | 3  | 3  |
| 3  | 2  | 3  | 1  | 1  | 2  | 3  | 2  |
| 4  | 99 | 99 | 1  | 1  | 4  | 4  | 99 |
| 4  | 99 | 4  | 1  | 1  | 99 | 99 | 99 |
| 3  | 99 | 99 | 2  | 1  | 3  | 3  | 3  |
| 4  | 1  | 4  | 1  | 1  | 99 | 4  | 4  |
| 99 | 99 | 99 | 99 | 99 | 99 | 99 | 99 |
| 1  | 99 | 4  | 1  | 1  | 1  | 1  | 2  |
| 3  | 2  | 3  | 2  | 2  | 3  | 3  | 3  |
| 3  | 1  | 4  | 1  | 1  | 4  | 4  | 4  |
| 3  | 3  | 3  | 2  | 2  | 2  | 3  | 4  |
| 3  | 1  | 4  | 2  | 1  | 3  | 2  | 3  |
| 3  | 99 | 99 | 99 | 2  | 3  | 2  | 3  |
| 3  | 3  | 4  | 2  | 2  | 3  | 3  | 3  |
| 4  | 1  | 4  | 1  | 1  | 4  | 4  | 4  |
| 4  | 2  | 4  | 2  | 1  | 3  | 3  | 2  |
| 3  | 2  | 3  | 2  | 1  | 4  | 3  | 3  |
| 2  | 99 | 3  | 2  | 2  | 2  | 2  | 3  |
| 3  | 2  | 4  | 2  | 1  | 3  | 3  | 99 |
| 3  | 2  | 3  | 1  | 1  | 3  | 3  | 99 |
| 99 | 99 | 99 | 99 | 99 | 99 | 99 | 99 |
| 3  | 2  | 3  | 2  | 2  | 2  | 2  | 99 |
| 4  | 1  | 4  | 1  | 1  | 2  | 4  | 4  |
| 3  | 1  | 4  | 1  | 1  | 3  | 3  | 4  |
| 4  | 2  | 4  | 2  | 1  | 4  | 4  | 99 |
| 4  | 2  | 4  | 1  | 1  | 4  | 4  | 4  |
| 3  | 3  | 4  | 1  | 1  | 1  | 2  | 3  |
| 2  | 2  | 3  | 2  | 1  | 4  | 4  | 4  |
| 3  | 1  | 4  | 1  | 1  | 3  | 4  | 3  |
| 4  | 1  | 2  | 2  | 1  | 3  | 3  | 3  |
| 3  | 3  | 4  | 2  | 1  | 1  | 2  | 3  |

|    |    |    |    |    |    |    |    |
|----|----|----|----|----|----|----|----|
| 99 | 99 | 99 | 99 | 99 | 99 | 99 | 99 |
| 2  | 3  | 2  | 2  | 3  | 2  | 2  | 3  |
| 4  | 1  | 4  | 1  | 1  | 4  | 4  | 4  |
| 3  | 99 | 99 | 2  | 1  | 3  | 3  | 3  |
| 3  | 2  | 3  | 3  | 2  | 3  | 3  | 3  |
| 3  | 99 | 3  | 2  | 2  | 99 | 99 | 3  |
| 99 | 99 | 4  | 1  | 1  | 4  | 4  | 99 |
| 3  | 2  | 3  | 2  | 2  | 3  | 2  | 3  |
| 3  | 2  | 3  | 2  | 2  | 3  | 2  | 3  |
| 3  | 2  | 3  | 3  | 2  | 3  | 3  | 3  |
| 4  | 1  | 4  | 1  | 1  | 3  | 4  | 4  |
| 4  | 1  | 4  | 2  | 1  | 3  | 3  | 99 |
| 3  | 2  | 3  | 3  | 2  | 3  | 3  | 3  |
| 99 | 1  | 3  | 2  | 1  | 3  | 3  | 4  |
| 2  | 2  | 3  | 3  | 1  | 2  | 3  | 2  |
| 4  | 1  | 4  | 1  | 1  | 4  | 4  | 4  |
| 4  | 2  | 4  | 1  | 1  | 3  | 3  | 4  |
| 4  | 2  | 4  | 1  | 1  | 3  | 4  | 4  |
| 1  | 4  | 3  | 99 | 2  | 1  | 2  | 3  |
| 3  | 1  | 4  | 3  | 1  | 2  | 2  | 3  |
| 4  | 1  | 4  | 1  | 1  | 4  | 4  | 4  |
| 3  | 2  | 1  | 1  | 1  | 2  | 3  | 4  |
| 99 | 99 | 99 | 99 | 99 | 99 | 99 | 99 |
| 4  | 2  | 3  | 2  | 2  | 3  | 3  | 3  |
| 3  | 1  | 4  | 1  | 1  | 3  | 3  | 3  |
| 1  | 1  | 4  | 1  | 1  | 4  | 4  | 4  |
| 4  | 2  | 1  | 1  | 1  | 2  | 3  | 3  |
| 3  | 2  | 3  | 2  | 1  | 99 | 99 | 99 |
| 3  | 2  | 3  | 2  | 2  | 3  | 3  | 3  |
| 3  | 2  | 2  | 1  | 1  | 4  | 4  | 2  |
| 3  | 3  | 3  | 2  | 2  | 3  | 3  | 3  |
| 3  | 1  | 4  | 1  | 1  | 4  | 4  | 4  |
| 4  | 1  | 1  | 1  | 1  | 1  | 1  | 1  |
| 4  | 2  | 4  | 2  | 1  | 2  | 2  | 2  |
| 4  | 1  | 4  | 1  | 1  | 4  | 4  | 4  |
| 4  | 2  | 4  | 2  | 1  | 2  | 2  | 2  |
| 3  | 3  | 3  | 3  | 2  | 3  | 2  | 2  |
| 2  | 2  | 99 | 1  | 1  | 3  | 3  | 3  |
| 4  | 1  | 4  | 1  | 1  | 4  | 4  | 4  |
| 3  | 1  | 3  | 99 | 3  | 4  | 4  | 3  |
| 4  | 1  | 4  | 1  | 1  | 4  | 4  | 4  |
| 1  | 1  | 1  | 1  | 1  | 4  | 1  | 4  |
| 4  | 1  | 4  | 1  | 1  | 3  | 3  | 4  |
| 4  | 1  | 1  | 1  | 1  | 4  | 4  | 4  |
| 3  | 2  | 4  | 1  | 1  | 2  | 3  | 2  |
| 4  | 4  | 4  | 4  | 4  | 4  | 4  | 4  |
| 99 | 99 | 99 | 2  | 2  | 99 | 99 | 99 |
| 2  | 1  | 3  | 1  | 1  | 2  | 2  | 3  |

|    |    |    |    |    |    |    |    |
|----|----|----|----|----|----|----|----|
| 2  | 3  | 4  | 3  | 1  | 4  | 4  | 3  |
| 1  | 3  | 3  | 3  | 2  | 4  | 1  | 2  |
| 3  | 2  | 2  | 2  | 2  | 2  | 2  | 2  |
| 3  | 1  | 3  | 2  | 1  | 4  | 4  | 3  |
| 4  | 2  | 4  | 2  | 1  | 4  | 3  | 2  |
| 4  | 1  | 4  | 2  | 1  | 4  | 4  | 4  |
| 4  | 1  | 4  | 1  | 1  | 4  | 4  | 4  |
| 3  | 1  | 4  | 2  | 1  | 3  | 4  | 3  |
| 4  | 99 | 99 | 1  | 1  | 3  | 4  | 4  |
| 4  | 1  | 99 | 1  | 1  | 4  | 3  | 4  |
| 4  | 1  | 4  | 1  | 1  | 4  | 4  | 4  |
| 3  | 2  | 3  | 1  | 1  | 99 | 3  | 3  |
| 4  | 1  | 4  | 1  | 1  | 2  | 4  | 4  |
| 2  | 2  | 2  | 2  | 2  | 2  | 2  | 2  |
| 3  | 2  | 3  | 2  | 1  | 3  | 3  | 3  |
| 3  | 2  | 3  | 99 | 2  | 2  | 1  | 3  |
| 3  | 2  | 3  | 2  | 2  | 3  | 2  | 3  |
| 3  | 99 | 4  | 99 | 1  | 3  | 4  | 4  |
| 99 | 1  | 99 | 1  | 1  | 4  | 4  | 99 |
| 4  | 1  | 4  | 1  | 1  | 3  | 4  | 4  |
| 4  | 1  | 4  | 1  | 1  | 4  | 4  | 4  |
| 3  | 2  | 3  | 2  | 1  | 99 | 99 | 99 |
| 3  | 2  | 4  | 2  | 1  | 2  | 2  | 3  |
| 3  | 99 | 3  | 1  | 1  | 4  | 4  | 3  |
| 3  | 2  | 4  | 2  | 2  | 4  | 3  | 3  |
| 2  | 3  | 3  | 3  | 2  | 3  | 4  | 4  |
| 3  | 99 | 4  | 2  | 1  | 3  | 4  | 2  |
| 4  | 1  | 4  | 1  | 1  | 4  | 4  | 4  |
| 99 | 99 | 99 | 99 | 99 | 2  | 2  | 3  |
| 3  | 3  | 99 | 2  | 1  | 3  | 3  | 2  |
| 3  | 3  | 3  | 3  | 2  | 4  | 4  | 3  |
| 4  | 4  | 4  | 2  | 1  | 2  | 2  | 4  |
| 4  | 1  | 4  | 1  | 1  | 3  | 3  | 4  |
| 4  | 2  | 4  | 2  | 1  | 3  | 3  | 3  |
| 4  | 1  | 1  | 1  | 1  | 4  | 4  | 4  |
| 4  | 1  | 4  | 1  | 1  | 1  | 2  | 1  |
| 2  | 2  | 4  | 1  | 1  | 4  | 4  | 2  |
| 3  | 2  | 3  | 2  | 1  | 4  | 4  | 4  |
| 99 | 99 | 99 | 99 | 99 | 4  | 4  | 3  |
| 4  | 1  | 4  | 1  | 1  | 1  | 1  | 1  |
| 3  | 1  | 4  | 1  | 1  | 4  | 4  | 3  |
| 4  | 1  | 4  | 1  | 1  | 4  | 4  | 4  |
| 4  | 1  | 99 | 1  | 1  | 3  | 3  | 99 |
| 3  | 2  | 3  | 3  | 1  | 3  | 3  | 3  |
| 4  | 1  | 1  | 1  | 1  | 1  | 1  | 2  |
| 4  | 2  | 4  | 2  | 1  | 4  | 4  | 4  |
| 4  | 1  | 4  | 1  | 1  | 4  | 4  | 4  |
| 2  | 4  | 2  | 3  | 2  | 2  | 2  | 4  |

|    |    |    |    |    |    |    |    |
|----|----|----|----|----|----|----|----|
| 1  | 3  | 2  | 3  | 3  | 1  | 1  | 4  |
| 3  | 3  | 3  | 2  | 99 | 3  | 1  | 2  |
| 4  | 2  | 4  | 2  | 1  | 2  | 2  | 3  |
| 2  | 2  | 3  | 3  | 2  | 3  | 3  | 4  |
| 3  | 3  | 4  | 3  | 3  | 3  | 3  | 4  |
| 4  | 1  | 4  | 1  | 1  | 4  | 4  | 4  |
| 3  | 2  | 3  | 2  | 1  | 3  | 3  | 4  |
| 4  | 99 | 3  | 99 | 1  | 3  | 3  | 3  |
| 3  | 2  | 99 | 2  | 2  | 3  | 3  | 3  |
| 3  | 2  | 3  | 2  | 1  | 3  | 3  | 3  |
| 2  | 2  | 3  | 3  | 2  | 3  | 2  | 2  |
| 3  | 3  | 4  | 3  | 3  | 4  | 4  | 4  |
| 2  | 3  | 3  | 3  | 2  | 4  | 4  | 4  |
| 2  | 2  | 2  | 2  | 2  | 3  | 3  | 3  |
| 3  | 2  | 3  | 3  | 2  | 3  | 3  | 3  |
| 4  | 3  | 3  | 3  | 3  | 4  | 2  | 2  |
| 3  | 2  | 3  | 2  | 1  | 3  | 4  | 4  |
| 3  | 2  | 3  | 2  | 1  | 3  | 3  | 3  |
| 2  | 2  | 2  | 3  | 2  | 2  | 2  | 3  |
| 3  | 99 | 3  | 99 | 99 | 99 | 99 | 99 |
| 2  | 3  | 1  | 4  | 3  | 1  | 1  | 2  |
| 4  | 2  | 4  | 1  | 1  | 3  | 4  | 4  |
| 3  | 2  | 99 | 1  | 1  | 3  | 3  | 4  |
| 4  | 2  | 3  | 2  | 1  | 4  | 4  | 4  |
| 4  | 99 | 4  | 1  | 1  | 4  | 4  | 4  |
| 3  | 2  | 3  | 2  | 2  | 2  | 2  | 2  |
| 4  | 1  | 4  | 1  | 1  | 4  | 4  | 4  |
| 4  | 1  | 4  | 1  | 1  | 4  | 4  | 4  |
| 99 | 3  | 4  | 99 | 2  | 1  | 2  | 1  |
| 4  | 1  | 4  | 1  | 1  | 99 | 99 | 99 |
| 4  | 1  | 4  | 1  | 1  | 4  | 4  | 4  |
| 4  | 1  | 4  | 3  | 1  | 4  | 3  | 4  |
| 4  | 2  | 4  | 2  | 1  | 2  | 3  | 3  |
| 3  | 2  | 3  | 2  | 2  | 3  | 2  | 2  |
| 1  | 99 | 99 | 1  | 1  | 3  | 4  | 2  |
| 99 | 99 | 99 | 99 | 99 | 4  | 4  | 4  |
| 4  | 2  | 3  | 3  | 2  | 4  | 4  | 4  |
| 4  | 1  | 4  | 1  | 1  | 4  | 4  | 4  |
| 2  | 3  | 3  | 2  | 2  | 3  | 3  | 3  |
| 2  | 3  | 99 | 3  | 1  | 3  | 4  | 2  |
| 3  | 1  | 3  | 2  | 1  | 1  | 1  | 4  |
| 3  | 2  | 4  | 2  | 1  | 4  | 4  | 3  |
| 99 | 99 | 99 | 99 | 99 | 4  | 4  | 99 |
| 4  | 1  | 4  | 1  | 1  | 4  | 4  | 4  |
| 4  | 1  | 4  | 1  | 1  | 4  | 4  | 2  |
| 4  | 1  | 4  | 1  | 1  | 3  | 3  | 4  |
| 4  | 2  | 3  | 2  | 1  | 4  | 4  | 4  |
| 3  | 2  | 3  | 2  | 2  | 3  | 3  | 2  |

|    |    |   |   |   |    |    |    |
|----|----|---|---|---|----|----|----|
| 4  | 1  | 4 | 1 | 1 | 3  | 3  | 3  |
| 3  | 3  | 3 | 3 | 2 | 4  | 4  | 3  |
| 3  | 2  | 3 | 2 | 2 | 3  | 3  | 3  |
| 1  | 1  | 1 | 1 | 1 | 1  | 1  | 2  |
| 4  | 2  | 4 | 1 | 1 | 2  | 2  | 2  |
| 4  | 99 | 4 | 1 | 1 | 4  | 4  | 4  |
| 3  | 2  | 2 | 2 | 2 | 2  | 2  | 2  |
| 4  | 1  | 4 | 1 | 1 | 4  | 4  | 4  |
| 4  | 3  | 4 | 1 | 1 | 3  | 3  | 1  |
| 3  | 2  | 3 | 2 | 2 | 3  | 4  | 3  |
| 2  | 3  | 3 | 3 | 2 | 3  | 3  | 2  |
| 3  | 2  | 3 | 2 | 2 | 3  | 3  | 3  |
| 4  | 99 | 4 | 1 | 1 | 4  | 4  | 4  |
| 2  | 3  | 2 | 1 | 1 | 4  | 99 | 4  |
| 4  | 2  | 3 | 2 | 1 | 2  | 3  | 3  |
| 4  | 1  | 4 | 1 | 1 | 4  | 4  | 4  |
| 2  | 2  | 3 | 3 | 3 | 3  | 3  | 4  |
| 99 | 2  | 3 | 2 | 2 | 4  | 4  | 4  |
| 4  | 2  | 3 | 2 | 2 | 2  | 2  | 2  |
| 4  | 1  | 4 | 1 | 1 | 4  | 4  | 4  |
| 1  | 1  | 4 | 2 | 1 | 4  | 3  | 1  |
| 2  | 3  | 4 | 3 | 2 | 3  | 3  | 4  |
| 4  | 3  | 4 | 1 | 1 | 1  | 1  | 1  |
| 2  | 1  | 4 | 2 | 1 | 1  | 1  | 1  |
| 3  | 2  | 3 | 2 | 1 | 3  | 3  | 3  |
| 3  | 3  | 3 | 1 | 1 | 3  | 3  | 3  |
| 2  | 3  | 3 | 2 | 1 | 3  | 3  | 3  |
| 2  | 1  | 1 | 4 | 4 | 4  | 2  | 4  |
| 4  | 1  | 4 | 1 | 1 | 99 | 99 | 99 |
| 4  | 1  | 4 | 1 | 1 | 4  | 4  | 4  |
| 3  | 1  | 4 | 1 | 1 | 2  | 2  | 1  |
| 4  | 1  | 4 | 1 | 1 | 4  | 4  | 4  |
| 4  | 2  | 4 | 3 | 1 | 3  | 4  | 4  |
| 2  | 2  | 3 | 2 | 2 | 3  | 3  | 3  |
| 4  | 1  | 4 | 1 | 1 | 4  | 4  | 99 |
| 3  | 2  | 3 | 3 | 1 | 2  | 3  | 3  |
| 4  | 4  | 4 | 2 | 2 | 1  | 2  | 2  |
| 3  | 2  | 3 | 2 | 2 | 4  | 4  | 3  |
| 3  | 2  | 3 | 2 | 2 | 2  | 2  | 3  |
| 3  | 2  | 3 | 2 | 2 | 2  | 2  | 2  |
| 3  | 2  | 4 | 1 | 1 | 4  | 4  | 4  |
| 3  | 1  | 3 | 2 | 1 | 4  | 3  | 4  |
| 4  | 1  | 4 | 1 | 1 | 4  | 4  | 4  |
| 4  | 2  | 3 | 1 | 1 | 3  | 3  | 3  |
| 2  | 2  | 2 | 2 | 2 | 3  | 3  | 3  |
| 3  | 2  | 3 | 2 | 2 | 4  | 4  | 4  |
| 4  | 3  | 4 | 3 | 2 | 2  | 2  | 2  |
| 3  | 1  | 4 | 1 | 2 | 3  | 3  | 3  |



|    |    |    |    |    |    |    |    |
|----|----|----|----|----|----|----|----|
| 3  | 1  | 4  | 2  | 1  | 4  | 4  | 4  |
| 4  | 2  | 3  | 2  | 2  | 4  | 4  | 4  |
| 2  | 1  | 4  | 2  | 2  | 4  | 4  | 4  |
| 4  | 1  | 4  | 1  | 1  | 3  | 4  | 4  |
| 3  | 1  | 4  | 1  | 1  | 4  | 4  | 4  |
| 3  | 2  | 3  | 2  | 1  | 4  | 4  | 4  |
| 4  | 1  | 4  | 1  | 1  | 1  | 3  | 4  |
| 3  | 1  | 3  | 2  | 1  | 3  | 4  | 4  |
| 4  | 1  | 4  | 1  | 1  | 4  | 4  | 4  |
| 2  | 2  | 3  | 2  | 2  | 99 | 3  | 3  |
| 3  | 2  | 3  | 2  | 1  | 1  | 3  | 2  |
| 3  | 2  | 4  | 2  | 1  | 3  | 4  | 3  |
| 3  | 1  | 4  | 2  | 1  | 1  | 2  | 3  |
| 2  | 2  | 2  | 3  | 2  | 2  | 1  | 3  |
| 4  | 2  | 4  | 1  | 1  | 3  | 3  | 3  |
| 4  | 1  | 4  | 1  | 1  | 1  | 1  | 1  |
| 2  | 2  | 3  | 2  | 1  | 4  | 4  | 4  |
| 2  | 2  | 3  | 2  | 2  | 2  | 2  | 2  |
| 99 | 99 | 99 | 99 | 3  | 99 | 99 | 99 |
| 1  | 4  | 3  | 4  | 3  | 3  | 2  | 2  |
| 4  | 1  | 4  | 1  | 1  | 4  | 4  | 4  |
| 1  | 3  | 2  | 3  | 4  | 3  | 3  | 4  |
| 3  | 99 | 3  | 2  | 1  | 3  | 3  | 3  |
| 4  | 4  | 4  | 4  | 1  | 1  | 1  | 2  |
| 4  | 99 | 4  | 99 | 1  | 4  | 4  | 2  |
| 3  | 99 | 3  | 2  | 1  | 3  | 3  | 2  |
| 2  | 3  | 2  | 3  | 2  | 3  | 3  | 3  |
| 3  | 1  | 1  | 1  | 1  | 3  | 3  | 3  |
| 2  | 3  | 2  | 3  | 3  | 2  | 2  | 99 |
| 2  | 2  | 2  | 2  | 2  | 2  | 3  | 3  |
| 99 | 99 | 99 | 99 | 99 | 99 | 99 | 99 |
| 3  | 99 | 3  | 2  | 1  | 3  | 3  | 3  |
| 1  | 1  | 1  | 1  | 1  | 2  | 2  | 2  |
| 3  | 3  | 4  | 2  | 1  | 99 | 3  | 99 |
| 3  | 1  | 4  | 2  | 2  | 4  | 4  | 99 |
| 3  | 1  | 4  | 1  | 1  | 4  | 3  | 4  |
| 4  | 1  | 4  | 2  | 1  | 3  | 3  | 3  |
| 3  | 2  | 3  | 3  | 2  | 3  | 2  | 3  |
| 3  | 1  | 3  | 2  | 1  | 2  | 2  | 2  |
| 3  | 1  | 3  | 2  | 1  | 2  | 3  | 3  |
| 4  | 1  | 4  | 1  | 1  | 4  | 4  | 4  |
| 99 | 99 | 99 | 99 | 1  | 4  | 4  | 99 |
| 4  | 1  | 4  | 1  | 1  | 4  | 4  | 4  |
| 4  | 1  | 4  | 3  | 1  | 4  | 4  | 4  |
| 4  | 3  | 4  | 1  | 1  | 1  | 3  | 1  |
| 4  | 1  | 4  | 1  | 1  | 4  | 4  | 4  |
| 4  | 1  | 4  | 1  | 1  | 4  | 4  | 4  |
| 2  | 3  | 4  | 4  | 4  | 2  | 3  | 3  |

|    |    |    |    |    |    |    |    |
|----|----|----|----|----|----|----|----|
| 4  | 1  | 4  | 1  | 1  | 4  | 4  | 99 |
| 99 | 2  | 3  | 99 | 99 | 3  | 2  | 99 |
| 4  | 1  | 1  | 1  | 1  | 3  | 4  | 3  |
| 3  | 2  | 3  | 2  | 2  | 3  | 3  | 3  |
| 3  | 2  | 3  | 2  | 2  | 3  | 2  | 3  |
| 4  | 99 | 99 | 2  | 2  | 99 | 99 | 99 |
| 3  | 2  | 2  | 3  | 1  | 4  | 4  | 4  |
| 3  | 2  | 4  | 1  | 1  | 4  | 4  | 4  |
| 2  | 3  | 3  | 2  | 2  | 3  | 3  | 2  |
| 4  | 1  | 4  | 1  | 1  | 1  | 4  | 4  |
| 4  | 1  | 1  | 1  | 1  | 2  | 2  | 2  |
| 3  | 1  | 4  | 2  | 1  | 1  | 4  | 1  |
| 4  | 1  | 1  | 1  | 1  | 4  | 4  | 4  |
| 3  | 2  | 3  | 3  | 1  | 3  | 3  | 3  |
| 2  | 3  | 3  | 3  | 2  | 3  | 3  | 3  |
| 4  | 1  | 4  | 1  | 1  | 4  | 4  | 4  |
| 3  | 2  | 4  | 1  | 1  | 2  | 2  | 3  |
| 4  | 2  | 3  | 2  | 1  | 2  | 2  | 2  |
| 4  | 4  | 1  | 1  | 1  | 3  | 3  | 3  |
| 4  | 2  | 4  | 2  | 1  | 1  | 2  | 3  |
| 4  | 2  | 4  | 1  | 1  | 3  | 3  | 4  |
| 3  | 3  | 3  | 2  | 1  | 4  | 4  | 2  |
| 2  | 3  | 3  | 2  | 2  | 3  | 3  | 2  |
| 3  | 3  | 3  | 3  | 3  | 3  | 3  | 3  |
| 4  | 1  | 3  | 1  | 1  | 4  | 4  | 4  |
| 3  | 2  | 3  | 2  | 2  | 3  | 3  | 4  |
| 4  | 1  | 4  | 2  | 4  | 99 | 99 | 99 |
| 1  | 1  | 4  | 1  | 1  | 3  | 3  | 4  |
| 1  | 2  | 3  | 3  | 3  | 1  | 1  | 2  |
| 2  | 2  | 3  | 2  | 2  | 2  | 2  | 3  |
| 4  | 1  | 4  | 1  | 2  | 4  | 4  | 4  |
| 3  | 2  | 3  | 2  | 1  | 4  | 4  | 4  |
| 3  | 1  | 1  | 1  | 1  | 4  | 4  | 4  |
| 4  | 1  | 4  | 1  | 1  | 2  | 3  | 4  |
| 3  | 1  | 3  | 1  | 1  | 4  | 4  | 4  |
| 2  | 2  | 3  | 99 | 2  | 2  | 3  | 3  |
| 3  | 3  | 3  | 2  | 1  | 2  | 3  | 3  |
| 3  | 2  | 3  | 2  | 2  | 3  | 3  | 3  |
| 4  | 1  | 4  | 1  | 1  | 3  | 3  | 3  |
| 4  | 2  | 4  | 1  | 1  | 1  | 1  | 4  |
| 2  | 2  | 2  | 2  | 2  | 3  | 3  | 3  |
| 2  | 3  | 3  | 3  | 2  | 3  | 3  | 3  |
| 1  | 2  | 2  | 3  | 2  | 3  | 2  | 3  |
| 4  | 1  | 4  | 1  | 1  | 3  | 4  | 4  |
| 2  | 1  | 3  | 4  | 1  | 3  | 3  | 3  |
| 4  | 1  | 4  | 1  | 1  | 3  | 4  | 4  |
| 2  | 2  | 3  | 2  | 1  | 3  | 3  | 3  |
| 3  | 2  | 3  | 1  | 1  | 3  | 4  | 3  |

|   |    |   |   |   |    |    |    |
|---|----|---|---|---|----|----|----|
| 4 | 1  | 4 | 1 | 1 | 4  | 4  | 4  |
| 4 | 2  | 4 | 2 | 1 | 3  | 3  | 3  |
| 4 | 2  | 3 | 2 | 1 | 4  | 3  | 4  |
| 2 | 2  | 4 | 2 | 2 | 4  | 4  | 4  |
| 3 | 1  | 1 | 1 | 1 | 4  | 4  | 4  |
| 4 | 2  | 3 | 2 | 2 | 4  | 4  | 4  |
| 3 | 3  | 1 | 1 | 1 | 99 | 99 | 99 |
| 3 | 2  | 2 | 2 | 2 | 2  | 3  | 2  |
| 3 | 1  | 4 | 1 | 1 | 3  | 3  | 3  |
| 3 | 99 | 4 | 2 | 1 | 4  | 4  | 99 |
| 2 | 3  | 3 | 2 | 2 | 3  | 3  | 3  |
| 2 | 2  | 3 | 2 | 1 | 4  | 4  | 3  |
| 3 | 3  | 2 | 2 | 2 | 3  | 3  | 3  |
| 4 | 1  | 3 | 1 | 3 | 3  | 3  | 1  |
| 2 | 2  | 3 | 3 | 2 | 4  | 4  | 4  |
| 4 | 1  | 4 | 1 | 1 | 4  | 4  | 1  |
| 3 | 2  | 3 | 2 | 2 | 2  | 2  | 2  |
| 3 | 4  | 3 | 3 | 1 | 99 | 3  | 3  |
| 3 | 2  | 3 | 2 | 3 | 3  | 3  | 3  |
| 3 | 2  | 3 | 1 | 1 | 1  | 3  | 1  |
| 4 | 3  | 4 | 2 | 1 | 3  | 3  | 4  |
| 4 | 1  | 4 | 1 | 1 | 4  | 4  | 4  |
| 4 | 2  | 4 | 1 | 1 | 4  | 4  | 4  |
| 1 | 3  | 3 | 1 | 1 | 4  | 1  | 1  |
| 2 | 3  | 3 | 3 | 2 | 3  | 3  | 3  |
| 4 | 2  | 3 | 2 | 1 | 3  | 3  | 3  |
| 3 | 2  | 3 | 2 | 1 | 2  | 3  | 1  |
| 4 | 1  | 4 | 1 | 1 | 3  | 3  | 3  |
| 4 | 1  | 4 | 1 | 1 | 4  | 4  | 4  |
| 4 | 1  | 4 | 1 | 1 | 1  | 3  | 4  |
| 4 | 2  | 4 | 1 | 1 | 3  | 99 | 99 |
| 4 | 1  | 4 | 1 | 1 | 4  | 4  | 4  |
| 4 | 1  | 4 | 1 | 1 | 4  | 1  | 1  |
| 4 | 1  | 4 | 2 | 1 | 3  | 3  | 4  |
| 2 | 2  | 3 | 2 | 1 | 3  | 4  | 3  |
| 3 | 2  | 3 | 2 | 2 | 3  | 3  | 3  |
| 3 | 2  | 4 | 2 | 1 | 4  | 4  | 3  |
| 4 | 1  | 3 | 1 | 1 | 2  | 3  | 3  |
| 3 | 3  | 3 | 3 | 2 | 2  | 2  | 3  |
| 2 | 2  | 4 | 2 | 2 | 2  | 2  | 4  |
| 1 | 4  | 3 | 3 | 2 | 3  | 3  | 3  |
| 4 | 1  | 4 | 1 | 1 | 4  | 4  | 4  |
| 1 | 1  | 1 | 1 | 1 | 4  | 4  | 4  |
| 4 | 2  | 3 | 2 | 1 | 4  | 4  | 2  |
| 4 | 2  | 4 | 1 | 1 | 4  | 4  | 99 |
| 3 | 3  | 3 | 2 | 1 | 2  | 2  | 2  |
| 3 | 2  | 3 | 2 | 1 | 3  | 3  | 3  |
| 3 | 2  | 3 | 2 | 2 | 3  | 3  | 2  |

|    |    |    |    |    |   |   |    |
|----|----|----|----|----|---|---|----|
| 3  | 3  | 3  | 2  | 1  | 2 | 2 | 3  |
| 4  | 1  | 4  | 1  | 1  | 4 | 3 | 3  |
| 3  | 2  | 4  | 2  | 1  | 3 | 4 | 4  |
| 4  | 99 | 3  | 2  | 1  | 3 | 3 | 99 |
| 4  | 1  | 4  | 1  | 1  | 4 | 4 | 4  |
| 4  | 2  | 3  | 2  | 1  | 3 | 3 | 2  |
| 3  | 1  | 3  | 3  | 2  | 4 | 4 | 4  |
| 4  | 3  | 4  | 4  | 99 | 4 | 4 | 4  |
| 4  | 1  | 4  | 1  | 1  | 4 | 4 | 4  |
| 4  | 2  | 4  | 1  | 2  | 4 | 4 | 4  |
| 3  | 2  | 4  | 2  | 1  | 3 | 3 | 4  |
| 4  | 1  | 3  | 1  | 1  | 3 | 3 | 3  |
| 2  | 1  | 4  | 1  | 1  | 2 | 4 | 3  |
| 1  | 1  | 4  | 1  | 1  | 4 | 4 | 1  |
| 2  | 3  | 99 | 99 | 2  | 4 | 3 | 3  |
| 3  | 2  | 2  | 2  | 2  | 3 | 3 | 3  |
| 3  | 2  | 4  | 1  | 1  | 3 | 4 | 2  |
| 3  | 1  | 4  | 2  | 1  | 3 | 2 | 3  |
| 4  | 1  | 3  | 2  | 1  | 4 | 4 | 3  |
| 2  | 2  | 3  | 99 | 1  | 4 | 4 | 4  |
| 4  | 1  | 4  | 1  | 1  | 1 | 1 | 3  |
| 4  | 1  | 4  | 1  | 1  | 4 | 4 | 4  |
| 4  | 1  | 4  | 1  | 1  | 3 | 3 | 4  |
| 4  | 1  | 4  | 1  | 1  | 4 | 4 | 4  |
| 3  | 3  | 3  | 3  | 1  | 3 | 4 | 3  |
| 2  | 3  | 3  | 3  | 2  | 4 | 4 | 3  |
| 2  | 2  | 4  | 99 | 3  | 4 | 4 | 3  |
| 1  | 4  | 3  | 3  | 2  | 3 | 4 | 4  |
| 3  | 2  | 4  | 2  | 2  | 4 | 4 | 4  |
| 3  | 2  | 3  | 2  | 2  | 3 | 4 | 3  |
| 4  | 1  | 4  | 1  | 1  | 4 | 4 | 4  |
| 3  | 2  | 3  | 1  | 1  | 3 | 4 | 4  |
| 4  | 2  | 4  | 1  | 1  | 4 | 3 | 3  |
| 3  | 1  | 99 | 2  | 1  | 3 | 3 | 3  |
| 3  | 1  | 4  | 2  | 1  | 3 | 4 | 3  |
| 99 | 2  | 99 | 3  | 2  | 2 | 2 | 2  |
| 3  | 99 | 3  | 2  | 2  | 2 | 2 | 2  |
| 4  | 1  | 4  | 1  | 1  | 4 | 4 | 4  |
| 4  | 1  | 3  | 1  | 1  | 3 | 3 | 4  |
| 3  | 3  | 2  | 3  | 1  | 4 | 4 | 4  |
| 1  | 1  | 1  | 1  | 1  | 3 | 3 | 99 |
| 4  | 1  | 4  | 1  | 1  | 3 | 2 | 3  |
| 3  | 4  | 1  | 4  | 1  | 4 | 4 | 4  |
| 3  | 3  | 3  | 2  | 2  | 2 | 3 | 3  |
| 3  | 2  | 3  | 2  | 2  | 2 | 2 | 3  |
| 4  | 99 | 99 | 99 | 1  | 4 | 4 | 1  |
| 4  | 1  | 1  | 1  | 1  | 4 | 4 | 4  |
| 4  | 2  | 4  | 1  | 1  | 4 | 4 | 4  |

|   |   |    |    |    |    |    |    |
|---|---|----|----|----|----|----|----|
| 4 | 1 | 4  | 1  | 1  | 4  | 4  | 4  |
| 1 | 3 | 2  | 1  | 2  | 2  | 2  | 3  |
| 3 | 2 | 2  | 3  | 2  | 3  | 3  | 3  |
| 4 | 2 | 3  | 2  | 4  | 1  | 1  | 2  |
| 4 | 2 | 4  | 2  | 1  | 4  | 4  | 4  |
| 3 | 2 | 3  | 2  | 1  | 3  | 3  | 3  |
| 1 | 1 | 99 | 99 | 99 | 99 | 99 | 99 |
| 3 | 2 | 3  | 2  | 2  | 2  | 3  | 2  |
| 4 | 1 | 1  | 1  | 1  | 4  | 4  | 4  |
| 1 | 1 | 4  | 1  | 1  | 4  | 4  | 3  |
| 2 | 2 | 3  | 99 | 2  | 2  | 2  | 3  |
| 1 | 1 | 2  | 4  | 4  | 2  | 4  | 4  |
| 3 | 3 | 3  | 2  | 3  | 4  | 4  | 4  |
| 3 | 3 | 3  | 2  | 2  | 3  | 3  | 2  |
| 4 | 1 | 4  | 1  | 1  | 4  | 4  | 4  |
| 2 | 3 | 4  | 2  | 1  | 4  | 4  | 4  |
| 2 | 2 | 3  | 2  | 2  | 4  | 4  | 4  |
| 3 | 1 | 4  | 2  | 1  | 4  | 4  | 3  |
| 4 | 3 | 3  | 3  | 1  | 3  | 3  | 4  |
| 3 | 3 | 3  | 2  | 2  | 4  | 4  | 4  |
| 4 | 2 | 4  | 3  | 1  | 4  | 4  | 4  |
| 4 | 3 | 3  | 1  | 2  | 3  | 3  | 3  |
| 4 | 2 | 4  | 2  | 1  | 4  | 4  | 3  |
| 2 | 2 | 99 | 2  | 2  | 2  | 2  | 3  |
| 1 | 1 | 3  | 1  | 1  | 3  | 3  | 4  |
| 3 | 3 | 3  | 2  | 2  | 2  | 2  | 2  |
| 4 | 2 | 4  | 2  | 1  | 2  | 2  | 2  |
| 4 | 1 | 4  | 1  | 1  | 4  | 4  | 4  |
| 3 | 3 | 3  | 3  | 2  | 3  | 3  | 3  |
| 1 | 1 | 4  | 1  | 1  | 4  | 2  | 1  |
| 4 | 3 | 3  | 2  | 1  | 3  | 3  | 3  |
| 3 | 2 | 3  | 2  | 1  | 2  | 2  | 2  |
| 2 | 1 | 3  | 1  | 1  | 3  | 3  | 2  |
| 4 | 1 | 4  | 1  | 1  | 3  | 4  | 4  |
| 3 | 1 | 1  | 1  | 1  | 3  | 3  | 3  |
| 3 | 2 | 3  | 2  | 2  | 3  | 3  | 3  |
| 4 | 1 | 4  | 2  | 2  | 4  | 3  | 4  |
| 3 | 2 | 3  | 3  | 2  | 3  | 3  | 3  |
| 3 | 2 | 4  | 2  | 1  | 3  | 4  | 4  |
| 4 | 2 | 3  | 2  | 1  | 4  | 4  | 4  |
| 4 | 1 | 3  | 1  | 1  | 3  | 4  | 4  |
| 2 | 2 | 3  | 3  | 2  | 4  | 4  | 4  |
| 2 | 3 | 3  | 3  | 2  | 2  | 2  | 3  |
| 4 | 2 | 3  | 2  | 1  | 4  | 4  | 4  |
| 2 | 3 | 3  | 3  | 3  | 4  | 4  | 4  |
| 2 | 3 | 2  | 3  | 3  | 3  | 3  | 3  |
| 4 | 1 | 4  | 1  | 99 | 1  | 2  | 2  |
| 3 | 2 | 3  | 2  | 1  | 3  | 3  | 3  |

|    |    |    |    |    |   |    |    |
|----|----|----|----|----|---|----|----|
| 2  | 2  | 3  | 2  | 2  | 3 | 4  | 3  |
| 4  | 2  | 3  | 3  | 3  | 2 | 2  | 3  |
| 4  | 1  | 4  | 2  | 1  | 4 | 4  | 4  |
| 3  | 2  | 3  | 2  | 2  | 3 | 3  | 3  |
| 1  | 1  | 1  | 1  | 1  | 4 | 4  | 4  |
| 4  | 2  | 3  | 1  | 1  | 3 | 3  | 3  |
| 4  | 3  | 4  | 3  | 1  | 2 | 2  | 3  |
| 4  | 1  | 4  | 1  | 1  | 3 | 3  | 3  |
| 2  | 3  | 4  | 1  | 1  | 4 | 4  | 3  |
| 2  | 3  | 4  | 1  | 1  | 3 | 4  | 3  |
| 4  | 1  | 4  | 2  | 2  | 4 | 4  | 4  |
| 99 | 99 | 99 | 99 | 99 | 3 | 3  | 4  |
| 3  | 2  | 3  | 2  | 1  | 3 | 3  | 3  |
| 4  | 2  | 3  | 2  | 1  | 4 | 4  | 3  |
| 2  | 3  | 2  | 2  | 1  | 2 | 2  | 4  |
| 2  | 2  | 3  | 2  | 2  | 2 | 2  | 99 |
| 3  | 2  | 3  | 1  | 1  | 4 | 4  | 4  |
| 2  | 3  | 3  | 2  | 2  | 3 | 3  | 3  |
| 4  | 1  | 4  | 1  | 1  | 4 | 4  | 1  |
| 4  | 99 | 4  | 2  | 1  | 2 | 99 | 3  |
| 1  | 3  | 3  | 3  | 1  | 1 | 1  | 1  |
| 3  | 2  | 3  | 2  | 1  | 3 | 3  | 3  |
| 99 | 2  | 99 | 2  | 2  | 2 | 2  | 99 |
| 3  | 1  | 3  | 2  | 1  | 4 | 4  | 4  |
| 4  | 1  | 4  | 1  | 1  | 1 | 99 | 99 |
| 4  | 1  | 4  | 1  | 1  | 4 | 4  | 4  |
| 3  | 1  | 4  | 1  | 1  | 3 | 3  | 2  |
| 4  | 99 | 99 | 2  | 2  | 3 | 3  | 4  |
| 3  | 2  | 2  | 2  | 1  | 4 | 4  | 4  |
| 4  | 1  | 4  | 1  | 1  | 4 | 4  | 4  |
| 4  | 2  | 4  | 2  | 1  | 2 | 3  | 2  |
| 3  | 3  | 3  | 2  | 1  | 3 | 3  | 3  |
| 3  | 3  | 3  | 3  | 1  | 1 | 1  | 4  |
| 4  | 4  | 4  | 1  | 1  | 4 | 4  | 4  |
| 2  | 2  | 4  | 2  | 1  | 4 | 4  | 2  |
| 3  | 2  | 4  | 1  | 1  | 3 | 3  | 4  |
| 2  | 2  | 3  | 2  | 2  | 2 | 2  | 2  |
| 3  | 1  | 4  | 1  | 1  | 4 | 4  | 4  |
| 1  | 1  | 1  | 1  | 1  | 3 | 3  | 2  |
| 4  | 2  | 3  | 1  | 2  | 3 | 3  | 3  |
| 4  | 1  | 4  | 2  | 1  | 3 | 2  | 2  |
| 99 | 99 | 99 | 99 | 1  | 4 | 99 | 99 |
| 4  | 2  | 2  | 1  | 1  | 3 | 3  | 4  |
| 2  | 2  | 4  | 3  | 1  | 4 | 4  | 4  |
| 4  | 2  | 2  | 2  | 2  | 3 | 3  | 3  |
| 4  | 3  | 4  | 3  | 1  | 2 | 3  | 2  |
| 4  | 1  | 4  | 1  | 1  | 4 | 4  | 4  |
| 99 | 99 | 99 | 99 | 99 | 3 | 3  | 99 |

|    |    |    |    |    |    |    |    |
|----|----|----|----|----|----|----|----|
| 4  | 3  | 3  | 2  | 1  | 4  | 4  | 4  |
| 2  | 3  | 3  | 3  | 1  | 3  | 3  | 3  |
| 3  | 3  | 4  | 3  | 1  | 4  | 4  | 3  |
| 4  | 1  | 4  | 2  | 1  | 4  | 4  | 4  |
| 1  | 1  | 4  | 1  | 1  | 4  | 4  | 4  |
| 3  | 2  | 4  | 1  | 1  | 4  | 4  | 3  |
| 4  | 1  | 3  | 1  | 1  | 4  | 4  | 3  |
| 3  | 2  | 3  | 2  | 2  | 3  | 3  | 3  |
| 4  | 1  | 4  | 1  | 1  | 4  | 4  | 4  |
| 4  | 1  | 4  | 1  | 1  | 4  | 4  | 3  |
| 4  | 1  | 4  | 1  | 1  | 1  | 1  | 1  |
| 99 | 3  | 3  | 2  | 1  | 4  | 4  | 4  |
| 4  | 1  | 4  | 1  | 1  | 3  | 4  | 3  |
| 4  | 1  | 4  | 1  | 1  | 1  | 1  | 4  |
| 4  | 2  | 3  | 2  | 2  | 4  | 3  | 4  |
| 3  | 2  | 2  | 2  | 2  | 3  | 3  | 3  |
| 2  | 3  | 3  | 3  | 3  | 3  | 3  | 4  |
| 3  | 2  | 3  | 2  | 2  | 3  | 3  | 3  |
| 99 | 99 | 99 | 99 | 99 | 99 | 99 | 99 |
| 4  | 1  | 4  | 1  | 1  | 4  | 4  | 4  |
| 3  | 2  | 4  | 2  | 1  | 1  | 1  | 2  |
| 4  | 1  | 4  | 1  | 1  | 4  | 4  | 4  |
| 4  | 2  | 3  | 3  | 2  | 3  | 3  | 3  |
| 4  | 2  | 4  | 2  | 1  | 99 | 99 | 99 |
| 2  | 3  | 2  | 1  | 1  | 3  | 3  | 1  |
| 2  | 1  | 4  | 1  | 1  | 4  | 2  | 2  |
| 4  | 4  | 3  | 1  | 1  | 4  | 2  | 3  |
| 4  | 1  | 4  | 2  | 1  | 2  | 2  | 2  |
| 3  | 2  | 2  | 1  | 2  | 2  | 2  | 2  |
| 2  | 2  | 3  | 2  | 2  | 2  | 2  | 3  |
| 3  | 2  | 3  | 2  | 1  | 4  | 4  | 4  |
| 2  | 2  | 3  | 2  | 1  | 2  | 3  | 3  |
| 3  | 2  | 3  | 2  | 1  | 4  | 4  | 3  |
| 2  | 3  | 2  | 3  | 3  | 3  | 3  | 3  |
| 4  | 2  | 4  | 1  | 1  | 4  | 4  | 4  |
| 3  | 2  | 4  | 2  | 2  | 4  | 4  | 4  |
| 3  | 2  | 2  | 2  | 2  | 4  | 4  | 4  |
| 2  | 2  | 4  | 2  | 2  | 3  | 3  | 3  |
| 2  | 2  | 2  | 3  | 2  | 3  | 3  | 3  |
| 4  | 1  | 4  | 1  | 1  | 4  | 4  | 4  |
| 2  | 2  | 3  | 2  | 2  | 2  | 1  | 2  |
| 99 | 2  | 3  | 3  | 2  | 4  | 2  | 4  |
| 1  | 2  | 99 | 4  | 3  | 99 | 4  | 2  |
| 4  | 1  | 4  | 1  | 1  | 4  | 4  | 4  |
| 3  | 2  | 3  | 1  | 1  | 4  | 4  | 4  |
| 3  | 2  | 4  | 1  | 1  | 2  | 2  | 3  |
| 3  | 2  | 3  | 2  | 1  | 4  | 4  | 4  |
| 4  | 1  | 4  | 1  | 1  | 4  | 4  | 4  |

|   |   |   |   |   |        |        |        |
|---|---|---|---|---|--------|--------|--------|
| 4 | 1 | 4 | 1 | 1 | 2      | 2      | 3      |
| 2 | 1 | 3 | 3 | 2 | 2      | 1      | 3      |
| 4 | 1 | 4 | 1 | 1 | 4      | 4      | 4      |
| 4 | 1 | 4 | 1 | 1 | #NULL! | #NULL! | #NULL! |
| 4 | 2 | 4 | 1 | 1 | #NULL! | #NULL! | #NULL! |
| 4 | 2 | 3 | 1 | 1 | #NULL! | #NULL! | #NULL! |
| 1 | 1 | 1 | 1 | 1 | #NULL! | #NULL! | #NULL! |
| 2 | 3 | 4 | 2 | 2 | #NULL! | #NULL! | #NULL! |
| 2 | 3 | 3 | 4 | 4 | #NULL! | #NULL! | #NULL! |
| 2 | 3 | 3 | 4 | 4 | #NULL! | #NULL! | #NULL! |
| 2 | 2 | 4 | 2 | 2 | #NULL! | #NULL! | #NULL! |
| 3 | 2 | 1 | 2 | 1 | #NULL! | #NULL! | #NULL! |
| 2 | 2 | 4 | 2 | 2 | #NULL! | #NULL! | #NULL! |
| 3 | 2 | 3 | 2 | 2 | #NULL! | #NULL! | #NULL! |
| 1 | 2 | 3 | 2 | 2 | #NULL! | #NULL! | #NULL! |
| 2 | 2 | 3 | 2 | 2 | #NULL! | #NULL! | #NULL! |
| 4 | 2 | 4 | 2 | 2 | #NULL! | #NULL! | #NULL! |
| 3 | 2 | 3 | 2 | 2 | #NULL! | #NULL! | #NULL! |
| 3 | 1 | 4 | 1 | 1 | #NULL! | #NULL! | #NULL! |
| 3 | 4 | 4 | 2 | 2 | #NULL! | #NULL! | #NULL! |
| 1 | 4 | 3 | 3 | 2 | #NULL! | #NULL! | #NULL! |
| 3 | 1 | 4 | 2 | 1 | #NULL! | #NULL! | #NULL! |
| 1 | 2 | 4 | 1 | 2 | #NULL! | #NULL! | #NULL! |
| 1 | 1 | 1 | 1 | 1 | #NULL! | #NULL! | #NULL! |
| 2 | 2 | 3 | 2 | 2 | #NULL! | #NULL! | #NULL! |
| 4 | 2 | 4 | 1 | 2 | #NULL! | #NULL! | #NULL! |
| 3 | 3 | 3 | 3 | 1 | #NULL! | #NULL! | #NULL! |
| 4 | 1 | 4 | 1 | 1 | #NULL! | #NULL! | #NULL! |
| 4 | 2 | 3 | 2 | 2 | #NULL! | #NULL! | #NULL! |
| 4 | 4 | 4 | 4 | 4 | #NULL! | #NULL! | #NULL! |
| 4 | 1 | 4 | 1 | 1 | #NULL! | #NULL! | #NULL! |
| 2 | 3 | 3 | 3 | 3 | #NULL! | #NULL! | #NULL! |
| 1 | 3 | 3 | 3 | 3 | #NULL! | #NULL! | #NULL! |
| 3 | 2 | 3 | 2 | 2 | #NULL! | #NULL! | #NULL! |
| 2 | 1 | 4 | 2 | 1 | #NULL! | #NULL! | #NULL! |
| 1 | 2 | 4 | 2 | 2 | #NULL! | #NULL! | #NULL! |
| 4 | 4 | 2 | 2 | 2 | #NULL! | #NULL! | #NULL! |
| 2 | 1 | 4 | 2 | 1 | #NULL! | #NULL! | #NULL! |
| 2 | 1 | 3 | 2 | 2 | #NULL! | #NULL! | #NULL! |
| 3 | 3 | 3 | 3 | 3 | #NULL! | #NULL! | #NULL! |
| 4 | 4 | 4 | 4 | 4 | #NULL! | #NULL! | #NULL! |
| 3 | 4 | 3 | 3 | 2 | #NULL! | #NULL! | #NULL! |
| 2 | 3 | 4 | 2 | 1 | #NULL! | #NULL! | #NULL! |
| 2 | 3 | 2 | 3 | 2 | #NULL! | #NULL! | #NULL! |
| 1 | 1 | 4 | 1 | 1 | #NULL! | #NULL! | #NULL! |
| 2 | 4 | 4 | 3 | 1 | #NULL! | #NULL! | #NULL! |
| 3 | 3 | 3 | 1 | 1 | #NULL! | #NULL! | #NULL! |
| 4 | 3 | 4 | 1 | 1 | #NULL! | #NULL! | #NULL! |



|        |        |        |        |        |        |        |        |
|--------|--------|--------|--------|--------|--------|--------|--------|
| 4      | 1      | 4      | 1      | 1      | #NULL! | #NULL! | #NULL! |
| 3      | 2      | 4      | 2      | 1      | #NULL! | #NULL! | #NULL! |
| 3      | 2      | 3      | 2      | 2      | #NULL! | #NULL! | #NULL! |
| 2      | 2      | 4      | 2      | 1      | #NULL! | #NULL! | #NULL! |
| 3      | 2      | 3      | 2      | 2      | #NULL! | #NULL! | #NULL! |
| 4      | 1      | 4      | 1      | 1      | #NULL! | #NULL! | #NULL! |
| 2      | 3      | 4      | 3      | 2      | #NULL! | #NULL! | #NULL! |
| 1      | 1      | 1      | 1      | 1      | #NULL! | #NULL! | #NULL! |
| 4      | 4      | 4      | 4      | 4      | #NULL! | #NULL! | #NULL! |
| 1      | 4      | 4      | 3      | 3      | #NULL! | #NULL! | #NULL! |
| 4      | 1      | 1      | 1      | 1      | #NULL! | #NULL! | #NULL! |
| #NULL! | 3      | #NULL! | 3      | 3      | #NULL! | #NULL! | #NULL! |
| #NULL! | #NULL! | #NULL! | #NULL! | #NULL! | #NULL! | #NULL! | #NULL! |
| 2      | 1      | 4      | 3      | 1      | #NULL! | #NULL! | #NULL! |
| 1      | 3      | 2      | 2      | 2      | #NULL! | #NULL! | #NULL! |
| 1      | 1      | 1      | 1      | 1      | #NULL! | #NULL! | #NULL! |
| 2      | 3      | 4      | 3      | 1      | #NULL! | #NULL! | #NULL! |
| 3      | 2      | 2      | 4      | 1      | #NULL! | #NULL! | #NULL! |
| 2      | 1      | 4      | 2      | 1      | #NULL! | #NULL! | #NULL! |
| 4      | 2      | 4      | 3      | 1      | #NULL! | #NULL! | #NULL! |
| 3      | 2      | 3      | 2      | #NULL! | #NULL! | #NULL! | #NULL! |
| 4      | 3      | 4      | 4      | 2      | #NULL! | #NULL! | #NULL! |
| 2      | 2      | 2      | 2      | 2      | #NULL! | #NULL! | #NULL! |
| 2      | 2      | 3      | 2      | 2      | #NULL! | #NULL! | #NULL! |
| 4      | 2      | 3      | 2      | 2      | #NULL! | #NULL! | #NULL! |
| #NULL! | 2      | 4      | 1      | 1      | #NULL! | #NULL! | #NULL! |
| 2      | 3      | 4      | 3      | 2      | #NULL! | #NULL! | #NULL! |
| 4      | 3      | 2      | 3      | 1      | #NULL! | #NULL! | #NULL! |
| 3      | 3      | 4      | 2      | 1      | #NULL! | #NULL! | #NULL! |
| 2      | 3      | 1      | 1      | 1      | #NULL! | #NULL! | #NULL! |
| 2      | 3      | 1      | 3      | 1      | #NULL! | #NULL! | #NULL! |
| 3      | 2      | 3      | 1      | 1      | #NULL! | #NULL! | #NULL! |
| 3      | 2      | 4      | 3      | 1      | #NULL! | #NULL! | #NULL! |
| 1      | 1      | 1      | 1      | 1      | #NULL! | #NULL! | #NULL! |
| 2      | 3      | 4      | 2      | 1      | #NULL! | #NULL! | #NULL! |
| 3      | 2      | 3      | 1      | 2      | #NULL! | #NULL! | #NULL! |
| 3      | 2      | 3      | 2      | 1      | #NULL! | #NULL! | #NULL! |
| 3      | 2      | 3      | 2      | 2      | #NULL! | #NULL! | #NULL! |
| 4      | 1      | 4      | 1      | 1      | #NULL! | #NULL! | #NULL! |
| 2      | 1      | 4      | 1      | 1      | #NULL! | #NULL! | #NULL! |
| 4      | 3      | 4      | 3      | 1      | #NULL! | #NULL! | #NULL! |
| 3      | 3      | 4      | 3      | 1      | #NULL! | #NULL! | #NULL! |
| 3      | 3      | 4      | 2      | 1      | #NULL! | #NULL! | #NULL! |
| 3      | 2      | 3      | 2      | 2      | #NULL! | #NULL! | #NULL! |
| 4      | 3      | 4      | 3      | 1      | #NULL! | #NULL! | #NULL! |
| 2      | 1      | 3      | 2      | 2      | #NULL! | #NULL! | #NULL! |
| 4      | 1      | 4      | 3      | 1      | #NULL! | #NULL! | #NULL! |
| 2      | 2      | 2      | 2      | 2      | #NULL! | #NULL! | #NULL! |

|        |        |        |        |        |        |        |        |
|--------|--------|--------|--------|--------|--------|--------|--------|
| 2      | 2      | 4      | 1      | 1      | #NULL! | #NULL! | #NULL! |
| 4      | 2      | 3      | 2      | 1      | #NULL! | #NULL! | #NULL! |
| 3      | 1      | 3      | 2      | 1      | #NULL! | #NULL! | #NULL! |
| 1      | 1      | 1      | 1      | 1      | #NULL! | #NULL! | #NULL! |
| 4      | 1      | 4      | 1      | 1      | #NULL! | #NULL! | #NULL! |
| 4      | 1      | 1      | 1      | 1      | #NULL! | #NULL! | #NULL! |
| 2      | 1      | 4      | 2      | 1      | #NULL! | #NULL! | #NULL! |
| 1      | 1      | 3      | 1      | 1      | #NULL! | #NULL! | #NULL! |
| 1      | 1      | 4      | 1      | 1      | #NULL! | #NULL! | #NULL! |
| 2      | 2      | 4      | 2      | 1      | #NULL! | #NULL! | #NULL! |
| 4      | 1      | 3      | 2      | 1      | #NULL! | #NULL! | #NULL! |
| 4      | 1      | 4      | 1      | 1      | #NULL! | #NULL! | #NULL! |
| 4      | 1      | 4      | 1      | 1      | #NULL! | #NULL! | #NULL! |
| 4      | 2      | 3      | 2      | 1      | #NULL! | #NULL! | #NULL! |
| 2      | 2      | 4      | 3      | 3      | #NULL! | #NULL! | #NULL! |
| 4      | 1      | 4      | 1      | 1      | #NULL! | #NULL! | #NULL! |
| #NULL! | #NULL! | #NULL! | #NULL! | #NULL! | #NULL! | #NULL! | #NULL! |
| 4      | 1      | 4      | 2      | 1      | #NULL! | #NULL! | #NULL! |
| 2      | #NULL! | 4      | 3      | 2      | #NULL! | #NULL! | #NULL! |
| 2      | 1      | 4      | 1      | 1      | #NULL! | #NULL! | #NULL! |
| 3      | 1      | 4      | 1      | 1      | #NULL! | #NULL! | #NULL! |

| pregd_pre | pccomma_pre | pccommb_pre | pccommc_pre | pccommd_pre | pccomme_pre | pccommf_pre |
|-----------|-------------|-------------|-------------|-------------|-------------|-------------|
| 99        | 0           | 0           | 0           | 0           | 0           | 0           |
| 2         | 0           | 0           | 0           | 0           | 0           | 0           |
| 4         | 0           | 0           | 0           | 0           | 0           | 0           |
| 4         | 0           | 0           | 0           | 1           | 0           | 0           |
| 1         | 0           | 0           | 0           | 0           | 0           | 1           |
| 99        | 99          | 99          | 99          | 99          | 99          | 99          |
| 4         | 0           | 0           | 2           | 0           | 99          | 0           |
| 2         | 0           | 0           | 0           | 1           | 0           | 1           |
| 99        | 99          | 99          | 99          | 99          | 99          | 99          |
| 1         | 1           | 0           | 0           | 2           | 1           | 1           |
| 1         | 0           | 0           | 0           | 0           | 0           | 0           |
| 2         | 1           | 0           | 0           | 1           | 0           | 1           |
| 2         | 0           | 0           | 0           | 0           | 0           | 0           |
| 1         | 0           | 0           | 0           | 0           | 0           | 0           |
| 1         | 0           | 0           | 0           | 0           | 0           | 0           |
| 3         | 1           | 1           | 0           | 1           | 1           | 0           |
| 99        | 0           | 0           | 0           | 0           | 0           | 0           |
| 2         | 0           | 0           | 0           | 99          | 0           | 0           |
| 99        | 2           | 1           | 1           | 1           | 2           | 1           |
| 2         | 1           | 0           | 0           | 2           | 1           | 99          |
| 99        | 99          | 99          | 99          | 99          | 99          | 99          |
| 1         | 0           | 0           | 0           | 0           | 0           | 0           |
| 99        | 0           | 0           | 0           | 0           | 0           | 0           |
| 4         | 2           | 0           | 0           | 2           | 0           | 2           |
| 4         | 0           | 0           | 0           | 0           | 0           | 0           |
| 3         | 0           | 0           | 0           | 0           | 0           | 0           |
| 2         | 0           | 0           | 0           | 0           | 0           | 0           |
| 4         | 0           | 0           | 0           | 0           | 0           | 0           |
| 4         | 0           | 0           | 0           | 0           | 0           | 0           |
| 3         | 1           | 1           | 0           | 1           | 0           | 0           |
| 3         | 0           | 0           | 0           | 2           | 0           | 0           |
| 1         | 2           | 0           | 0           | 2           | 0           | 1           |
| 3         | 0           | 0           | 0           | 1           | 0           | 0           |
| 3         | 0           | 0           | 0           | 0           | 0           | 0           |
| 99        | 0           | 0           | 99          | 0           | 0           | 99          |
| 4         | 1           | 0           | 1           | 2           | 0           | 1           |
| 2         | 0           | 0           | 0           | 1           | 0           | 0           |
| 4         | 0           | 0           | 0           | 1           | 0           | 0           |
| 4         | 0           | 0           | 0           | 1           | 0           | 1           |
| 2         | 1           | 1           | 0           | 2           | 1           | 0           |
| 4         | 0           | 0           | 0           | 2           | 0           | 2           |
| 99        | 0           | 0           | 0           | 1           | 0           | 0           |
| 4         | 1           | 1           | 0           | 0           | 0           | 0           |
| 3         | 0           | 0           | 0           | 0           | 0           | 0           |
| 2         | 1           | 0           | 2           | 2           | 1           | 0           |
| 4         | 1           | 0           | 1           | 1           | 1           | 2           |
| 2         | 0           | 0           | 0           | 0           | 0           | 0           |

|    |   |    |    |    |   |   |
|----|---|----|----|----|---|---|
| 4  | 1 | 1  | 1  | 0  | 0 | 0 |
| 4  | 0 | 0  | 0  | 1  | 0 | 1 |
| 4  | 2 | 0  | 2  | 2  | 1 | 0 |
| 3  | 1 | 1  | 1  | 2  | 0 | 1 |
| 3  | 0 | 0  | 0  | 2  | 0 | 0 |
| 2  | 1 | 2  | 1  | 0  | 0 | 0 |
| 3  | 0 | 0  | 0  | 1  | 0 | 0 |
| 2  | 1 | 0  | 1  | 1  | 0 | 0 |
| 2  | 0 | 0  | 0  | 1  | 0 | 1 |
| 1  | 1 | 0  | 0  | 2  | 0 | 1 |
| 3  | 0 | 0  | 0  | 0  | 0 | 0 |
| 4  | 0 | 0  | 0  | 1  | 0 | 0 |
| 3  | 0 | 0  | 0  | 1  | 0 | 0 |
| 2  | 2 | 2  | 2  | 2  | 2 | 0 |
| 2  | 0 | 0  | 1  | 1  | 0 | 0 |
| 2  | 2 | 99 | 2  | 2  | 0 | 0 |
| 4  | 1 | 1  | 0  | 2  | 0 | 0 |
| 4  | 0 | 0  | 0  | 1  | 1 | 0 |
| 4  | 1 | 1  | 0  | 0  | 0 | 0 |
| 2  | 2 | 1  | 0  | 2  | 1 | 0 |
| 2  | 2 | 0  | 2  | 2  | 1 | 1 |
| 99 | 1 | 0  | 0  | 2  | 0 | 0 |
| 4  | 0 | 0  | 0  | 2  | 0 | 0 |
| 1  | 0 | 0  | 0  | 2  | 0 | 0 |
| 4  | 2 | 2  | 99 | 2  | 1 | 1 |
| 4  | 0 | 0  | 0  | 2  | 0 | 1 |
| 1  | 0 | 0  | 0  | 2  | 0 | 0 |
| 2  | 2 | 2  | 2  | 2  | 2 | 2 |
| 99 | 0 | 0  | 0  | 1  | 0 | 0 |
| 2  | 1 | 0  | 1  | 2  | 0 | 1 |
| 99 | 0 | 0  | 0  | 2  | 0 | 0 |
| 2  | 1 | 0  | 0  | 2  | 0 | 0 |
| 2  | 0 | 0  | 2  | 2  | 2 | 2 |
| 4  | 2 | 2  | 1  | 2  | 1 | 2 |
| 2  | 1 | 0  | 0  | 1  | 0 | 1 |
| 4  | 0 | 0  | 0  | 0  | 0 | 0 |
| 4  | 0 | 0  | 0  | 0  | 0 | 0 |
| 3  | 1 | 1  | 2  | 2  | 1 | 1 |
| 2  | 0 | 0  | 0  | 2  | 1 | 2 |
| 4  | 2 | 1  | 2  | 99 | 0 | 0 |
| 4  | 1 | 0  | 1  | 2  | 1 | 1 |
| 4  | 0 | 0  | 0  | 0  | 0 | 0 |
| 1  | 1 | 1  | 0  | 1  | 0 | 0 |
| 3  | 0 | 0  | 0  | 0  | 0 | 0 |
| 2  | 2 | 1  | 1  | 99 | 0 | 1 |
| 4  | 0 | 0  | 0  | 1  | 0 | 0 |
| 4  | 0 | 0  | 0  | 0  | 0 | 0 |
| 1  | 1 | 0  | 0  | 1  | 0 | 0 |

|   |    |    |    |    |    |    |
|---|----|----|----|----|----|----|
| 2 | 0  | 99 | 0  | 1  | 0  | 0  |
| 4 | 1  | 1  | 1  | 1  | 1  | 0  |
| 2 | 2  | 2  | 1  | 2  | 1  | 1  |
| 4 | 1  | 1  | 1  | 2  | 0  | 1  |
| 3 | 2  | 1  | 2  | 2  | 2  | 2  |
| 3 | 1  | 0  | 1  | 0  | 0  | 0  |
| 1 | 2  | 1  | 1  | 2  | 1  | 2  |
| 3 | 1  | 0  | 0  | 2  | 0  | 0  |
| 2 | 1  | 1  | 1  | 2  | 1  | 1  |
| 4 | 2  | 2  | 2  | 2  | 2  | 2  |
| 1 | 0  | 0  | 1  | 2  | 0  | 0  |
| 2 | 1  | 1  | 0  | 1  | 0  | 0  |
| 4 | 2  | 2  | 2  | 1  | 1  | 2  |
| 1 | 2  | 1  | 1  | 1  | 0  | 1  |
| 3 | 2  | 0  | 0  | 2  | 0  | 2  |
| 2 | 0  | 0  | 0  | 0  | 0  | 0  |
| 2 | 2  | 1  | 2  | 2  | 1  | 2  |
| 1 | 1  | 0  | 0  | 2  | 0  | 0  |
| 3 | 2  | 2  | 0  | 2  | 1  | 2  |
| 3 | 0  | 0  | 0  | 1  | 1  | 0  |
| 2 | 1  | 0  | 1  | 2  | 0  | 1  |
| 4 | 1  | 1  | 1  | 1  | 1  | 1  |
| 4 | 2  | 0  | 0  | 0  | 0  | 0  |
| 4 | 1  | 0  | 0  | 2  | 0  | 0  |
| 4 | 2  | 2  | 2  | 2  | 2  | 2  |
| 4 | 1  | 1  | 1  | 1  | 1  | 1  |
| 4 | 2  | 0  | 1  | 99 | 0  | 99 |
| 3 | 0  | 0  | 0  | 0  | 0  | 0  |
| 2 | 0  | 0  | 0  | 2  | 0  | 0  |
| 3 | 1  | 0  | 1  | 1  | 0  | 1  |
| 4 | 0  | 0  | 0  | 1  | 0  | 1  |
| 2 | 1  | 0  | 0  | 1  | 0  | 0  |
| 4 | 99 | 99 | 99 | 99 | 99 | 99 |
| 4 | 1  | 0  | 0  | 1  | 0  | 99 |
| 2 | 1  | 1  | 1  | 2  | 1  | 0  |
| 1 | 0  | 99 | 0  | 0  | 0  | 0  |
| 2 | 0  | 0  | 0  | 1  | 0  | 0  |
| 2 | 2  | 1  | 1  | 2  | 1  | 2  |
| 1 | 1  | 0  | 0  | 2  | 0  | 2  |
| 3 | 0  | 0  | 0  | 0  | 0  | 0  |
| 2 | 0  | 0  | 0  | 1  | 0  | 0  |
| 3 | 2  | 2  | 1  | 1  | 1  | 2  |
| 3 | 1  | 1  | 1  | 1  | 0  | 0  |
| 3 | 0  | 0  | 0  | 1  | 0  | 0  |
| 2 | 1  | 0  | 1  | 0  | 1  | 1  |
| 2 | 0  | 0  | 0  | 1  | 0  | 0  |
| 2 | 1  | 0  | 0  | 2  | 0  | 0  |
| 1 | 1  | 2  | 2  | 2  | 0  | 0  |

|    |    |    |    |    |    |    |    |
|----|----|----|----|----|----|----|----|
| 2  | 1  | 0  | 0  | 0  | 0  | 0  | 0  |
| 1  | 1  | 1  | 1  | 1  | 2  | 1  | 1  |
| 1  | 0  | 0  | 0  | 0  | 1  | 0  | 0  |
| 4  | 2  | 1  | 1  | 1  | 2  | 1  | 2  |
| 2  | 1  | 0  | 0  | 0  | 1  | 0  | 0  |
| 1  | 99 | 99 | 99 | 99 | 99 | 99 | 99 |
| 2  | 0  | 0  | 0  | 0  | 0  | 0  | 0  |
| 2  | 1  | 0  | 0  | 0  | 1  | 0  | 0  |
| 4  | 1  | 0  | 1  | 1  | 1  | 0  | 0  |
| 4  | 0  | 0  | 0  | 0  | 0  | 0  | 0  |
| 3  | 1  | 0  | 0  | 0  | 1  | 0  | 1  |
| 1  | 0  | 0  | 0  | 0  | 0  | 0  | 0  |
| 3  | 0  | 0  | 0  | 0  | 0  | 0  | 0  |
| 2  | 1  | 0  | 0  | 0  | 2  | 0  | 0  |
| 4  | 1  | 0  | 0  | 0  | 0  | 0  | 0  |
| 3  | 2  | 1  | 0  | 0  | 1  | 0  | 1  |
| 3  | 1  | 0  | 0  | 0  | 1  | 1  | 1  |
| 4  | 0  | 0  | 0  | 0  | 1  | 0  | 0  |
| 4  | 1  | 0  | 0  | 0  | 1  | 1  | 1  |
| 2  | 0  | 0  | 0  | 0  | 1  | 0  | 0  |
| 3  | 0  | 0  | 0  | 0  | 1  | 0  | 0  |
| 2  | 0  | 0  | 0  | 0  | 2  | 0  | 0  |
| 4  | 1  | 1  | 1  | 1  | 1  | 1  | 1  |
| 3  | 1  | 0  | 1  | 1  | 1  | 0  | 1  |
| 3  | 0  | 0  | 0  | 0  | 0  | 0  | 0  |
| 2  | 0  | 0  | 0  | 0  | 0  | 0  | 0  |
| 3  | 0  | 0  | 0  | 0  | 0  | 0  | 0  |
| 4  | 1  | 0  | 0  | 0  | 1  | 0  | 0  |
| 4  | 0  | 0  | 0  | 0  | 0  | 0  | 0  |
| 3  | 1  | 0  | 0  | 0  | 0  | 0  | 0  |
| 99 | 0  | 0  | 0  | 0  | 0  | 0  | 0  |
| 99 | 0  | 0  | 0  | 0  | 1  | 0  | 0  |
| 4  | 0  | 0  | 0  | 0  | 0  | 0  | 0  |
| 4  | 0  | 0  | 0  | 0  | 0  | 0  | 0  |
| 4  | 1  | 1  | 0  | 1  | 1  | 0  | 0  |
| 1  | 1  | 1  | 0  | 1  | 1  | 0  | 0  |
| 99 | 0  | 0  | 0  | 0  | 1  | 0  | 0  |
| 2  | 0  | 0  | 0  | 0  | 0  | 0  | 0  |
| 4  | 0  | 0  | 99 | 99 | 0  | 0  | 0  |
| 2  | 1  | 1  | 0  | 1  | 1  | 0  | 1  |
| 3  | 1  | 0  | 0  | 0  | 1  | 2  | 0  |
| 4  | 0  | 0  | 0  | 0  | 2  | 0  | 0  |
| 4  | 0  | 0  | 0  | 0  | 2  | 0  | 1  |
| 2  | 1  | 0  | 2  | 99 | 0  | 0  | 2  |
| 2  | 1  | 0  | 0  | 1  | 0  | 0  | 0  |
| 4  | 2  | 1  | 2  | 2  | 2  | 2  | 2  |
| 1  | 1  | 1  | 0  | 1  | 1  | 99 | 1  |
| 4  | 0  | 0  | 0  | 1  | 0  | 0  | 0  |

|    |    |    |    |    |    |    |    |
|----|----|----|----|----|----|----|----|
| 3  | 0  | 0  | 0  | 0  | 0  | 0  | 0  |
| 4  | 0  | 0  | 0  | 0  | 0  | 0  | 0  |
| 1  | 0  | 0  | 0  | 0  | 1  | 0  | 0  |
| 4  | 0  | 0  | 0  | 0  | 1  | 0  | 0  |
| 3  | 1  | 0  | 0  | 0  | 1  | 0  | 0  |
| 4  | 0  | 0  | 0  | 0  | 0  | 0  | 0  |
| 3  | 0  | 0  | 0  | 0  | 0  | 0  | 0  |
| 4  | 2  | 2  | 2  | 2  | 2  | 0  | 2  |
| 3  | 0  | 0  | 0  | 0  | 0  | 0  | 0  |
| 2  | 1  | 1  | 1  | 1  | 2  | 1  | 1  |
| 3  | 0  | 0  | 0  | 0  | 0  | 0  | 0  |
| 2  | 2  | 0  | 1  | 1  | 2  | 99 | 1  |
| 2  | 1  | 1  | 1  | 1  | 1  | 0  | 0  |
| 2  | 99 | 99 | 99 | 99 | 99 | 99 | 99 |
| 1  | 1  | 0  | 1  | 1  | 1  | 1  | 1  |
| 1  | 2  | 2  | 1  | 2  | 2  | 2  | 2  |
| 3  | 0  | 0  | 0  | 0  | 1  | 0  | 1  |
| 2  | 0  | 0  | 0  | 0  | 0  | 0  | 0  |
| 3  | 1  | 1  | 1  | 1  | 2  | 1  | 1  |
| 1  | 0  | 0  | 0  | 0  | 1  | 0  | 0  |
| 3  | 0  | 1  | 0  | 0  | 0  | 0  | 0  |
| 99 | 0  | 0  | 0  | 0  | 1  | 0  | 0  |
| 3  | 0  | 0  | 0  | 0  | 0  | 0  | 0  |
| 1  | 0  | 0  | 0  | 0  | 0  | 0  | 0  |
| 1  | 1  | 0  | 0  | 0  | 1  | 0  | 0  |
| 1  | 1  | 0  | 0  | 0  | 0  | 0  | 2  |
| 2  | 0  | 0  | 0  | 0  | 1  | 0  | 0  |
| 3  | 1  | 0  | 0  | 0  | 2  | 0  | 1  |
| 1  | 1  | 0  | 0  | 0  | 2  | 1  | 0  |
| 4  | 0  | 0  | 0  | 0  | 0  | 0  | 0  |
| 2  | 2  | 1  | 2  | 2  | 2  | 1  | 2  |
| 3  | 1  | 0  | 1  | 1  | 2  | 1  | 1  |
| 4  | 2  | 2  | 2  | 2  | 2  | 2  | 2  |
| 99 | 1  | 1  | 0  | 1  | 1  | 0  | 1  |
| 4  | 2  | 2  | 2  | 2  | 2  | 1  | 1  |
| 1  | 1  | 0  | 2  | 2  | 2  | 0  | 0  |
| 2  | 0  | 0  | 0  | 0  | 0  | 0  | 0  |
| 3  | 1  | 0  | 0  | 0  | 0  | 0  | 0  |
| 4  | 0  | 0  | 0  | 0  | 0  | 0  | 0  |
| 3  | 1  | 2  | 2  | 2  | 2  | 2  | 2  |
| 4  | 0  | 0  | 0  | 0  | 2  | 0  | 0  |
| 2  | 0  | 0  | 0  | 0  | 1  | 0  | 0  |
| 2  | 1  | 1  | 2  | 2  | 2  | 1  | 2  |
| 4  | 0  | 0  | 0  | 0  | 1  | 0  | 0  |
| 4  | 0  | 0  | 0  | 0  | 1  | 0  | 0  |
| 2  | 2  | 1  | 1  | 0  | 0  | 0  | 0  |
| 3  | 0  | 0  | 0  | 0  | 0  | 0  | 0  |
| 4  | 0  | 0  | 0  | 0  | 0  | 0  | 0  |

|    |   |    |    |    |   |    |
|----|---|----|----|----|---|----|
| 3  | 0 | 0  | 0  | 1  | 0 | 0  |
| 4  | 1 | 0  | 1  | 1  | 0 | 1  |
| 2  | 1 | 0  | 0  | 1  | 0 | 0  |
| 4  | 0 | 0  | 0  | 99 | 0 | 0  |
| 1  | 2 | 0  | 0  | 2  | 2 | 1  |
| 1  | 1 | 0  | 0  | 1  | 0 | 1  |
| 3  | 1 | 0  | 0  | 2  | 0 | 0  |
| 3  | 0 | 0  | 0  | 0  | 0 | 0  |
| 3  | 1 | 2  | 1  | 2  | 1 | 1  |
| 4  | 1 | 0  | 0  | 1  | 0 | 0  |
| 4  | 0 | 0  | 0  | 0  | 0 | 0  |
| 3  | 0 | 0  | 0  | 0  | 0 | 0  |
| 3  | 0 | 0  | 0  | 1  | 0 | 0  |
| 2  | 1 | 0  | 0  | 1  | 1 | 0  |
| 1  | 0 | 0  | 1  | 1  | 0 | 0  |
| 2  | 1 | 0  | 0  | 1  | 0 | 0  |
| 4  | 0 | 0  | 0  | 1  | 0 | 0  |
| 99 | 0 | 0  | 0  | 0  | 0 | 0  |
| 4  | 1 | 0  | 0  | 2  | 0 | 0  |
| 3  | 1 | 0  | 0  | 2  | 0 | 1  |
| 2  | 1 | 1  | 1  | 2  | 1 | 0  |
| 4  | 1 | 0  | 0  | 2  | 0 | 0  |
| 4  | 0 | 0  | 0  | 1  | 0 | 0  |
| 4  | 0 | 0  | 0  | 0  | 0 | 0  |
| 4  | 0 | 0  | 0  | 0  | 0 | 0  |
| 2  | 1 | 0  | 99 | 0  | 0 | 0  |
| 4  | 1 | 0  | 0  | 0  | 0 | 0  |
| 4  | 1 | 0  | 0  | 1  | 0 | 1  |
| 3  | 1 | 1  | 99 | 2  | 1 | 1  |
| 4  | 0 | 0  | 0  | 0  | 0 | 0  |
| 3  | 1 | 0  | 1  | 2  | 0 | 0  |
| 4  | 0 | 0  | 0  | 2  | 0 | 1  |
| 3  | 1 | 0  | 0  | 1  | 0 | 0  |
| 3  | 2 | 0  | 0  | 2  | 2 | 0  |
| 1  | 0 | 0  | 0  | 2  | 0 | 0  |
| 4  | 2 | 99 | 1  | 1  | 1 | 1  |
| 3  | 1 | 0  | 0  | 2  | 0 | 1  |
| 2  | 1 | 1  | 0  | 1  | 0 | 0  |
| 2  | 0 | 0  | 0  | 1  | 0 | 0  |
| 2  | 2 | 0  | 2  | 2  | 2 | 99 |
| 1  | 0 | 0  | 1  | 1  | 0 | 1  |
| 3  | 0 | 0  | 0  | 0  | 0 | 0  |
| 2  | 1 | 0  | 0  | 2  | 0 | 0  |
| 2  | 0 | 0  | 0  | 0  | 0 | 0  |
| 2  | 0 | 0  | 0  | 2  | 0 | 2  |
| 2  | 0 | 0  | 0  | 1  | 0 | 1  |
| 4  | 0 | 0  | 0  | 1  | 0 | 1  |
| 1  | 1 | 0  | 1  | 2  | 0 | 1  |



|    |   |   |   |   |   |    |
|----|---|---|---|---|---|----|
| 2  | 0 | 0 | 0 | 1 | 1 | 1  |
| 4  | 1 | 0 | 0 | 2 | 0 | 2  |
| 4  | 2 | 0 | 0 | 2 | 0 | 0  |
| 4  | 1 | 0 | 0 | 1 | 0 | 0  |
| 1  | 0 | 0 | 1 | 1 | 0 | 0  |
| 3  | 0 | 0 | 0 | 0 | 0 | 0  |
| 4  | 1 | 0 | 0 | 1 | 0 | 0  |
| 3  | 0 | 0 | 0 | 1 | 0 | 0  |
| 4  | 1 | 0 | 0 | 2 | 0 | 0  |
| 3  | 2 | 2 | 1 | 2 | 2 | 2  |
| 4  | 1 | 0 | 0 | 2 | 1 | 0  |
| 2  | 0 | 0 | 0 | 0 | 0 | 0  |
| 2  | 0 | 1 | 1 | 2 | 0 | 0  |
| 3  | 1 | 0 | 0 | 1 | 0 | 1  |
| 2  | 2 | 0 | 0 | 2 | 0 | 0  |
| 3  | 1 | 1 | 0 | 2 | 0 | 0  |
| 2  | 1 | 0 | 0 | 2 | 0 | 0  |
| 1  | 2 | 1 | 2 | 2 | 1 | 0  |
| 4  | 1 | 0 | 1 | 2 | 2 | 1  |
| 3  | 2 | 1 | 1 | 2 | 0 | 2  |
| 3  | 1 | 0 | 0 | 2 | 0 | 0  |
| 1  | 1 | 0 | 1 | 2 | 0 | 0  |
| 4  | 0 | 0 | 0 | 1 | 0 | 0  |
| 2  | 2 | 1 | 1 | 2 | 1 | 99 |
| 2  | 0 | 0 | 0 | 2 | 0 | 0  |
| 3  | 0 | 0 | 0 | 1 | 0 | 0  |
| 2  | 2 | 1 | 1 | 1 | 0 | 0  |
| 2  | 1 | 1 | 1 | 1 | 1 | 1  |
| 99 | 1 | 0 | 0 | 0 | 0 | 2  |
| 99 | 0 | 0 | 0 | 0 | 0 | 0  |
| 1  | 2 | 1 | 0 | 1 | 1 | 2  |
| 2  | 0 | 0 | 0 | 1 | 0 | 0  |
| 4  | 2 | 1 | 2 | 2 | 2 | 1  |
| 2  | 0 | 0 | 0 | 0 | 0 | 0  |
| 3  | 0 | 0 | 0 | 0 | 0 | 0  |
| 1  | 0 | 0 | 0 | 0 | 0 | 0  |
| 2  | 1 | 0 | 1 | 2 | 0 | 0  |
| 2  | 0 | 0 | 1 | 1 | 0 | 0  |
| 4  | 1 | 0 | 0 | 1 | 0 | 0  |
| 2  | 0 | 0 | 0 | 0 | 0 | 0  |
| 4  | 0 | 1 | 0 | 0 | 0 | 2  |
| 3  | 2 | 0 | 1 | 2 | 1 | 0  |
| 2  | 0 | 0 | 0 | 1 | 0 | 0  |
| 3  | 0 | 0 | 0 | 2 | 0 | 0  |
| 2  | 1 | 0 | 1 | 1 | 1 | 1  |
| 3  | 1 | 1 | 1 | 2 | 0 | 1  |
| 2  | 0 | 0 | 0 | 1 | 0 | 0  |
| 3  | 1 | 0 | 0 | 1 | 0 | 0  |

|    |    |    |    |    |    |    |    |
|----|----|----|----|----|----|----|----|
| 3  | 1  | 0  | 0  | 0  | 0  | 0  | 0  |
| 2  | 0  | 0  | 0  | 0  | 1  | 0  | 0  |
| 1  | 2  | 1  | 1  | 1  | 2  | 2  | 2  |
| 2  | 1  | 1  | 0  | 0  | 1  | 0  | 1  |
| 4  | 0  | 0  | 0  | 0  | 1  | 1  | 0  |
| 99 | 0  | 0  | 0  | 0  | 0  | 0  | 0  |
| 2  | 1  | 0  | 1  | 0  | 0  | 0  | 0  |
| 2  | 1  | 1  | 1  | 1  | 1  | 0  | 1  |
| 1  | 2  | 0  | 2  | 2  | 2  | 2  | 0  |
| 3  | 0  | 0  | 0  | 0  | 1  | 0  | 0  |
| 1  | 1  | 2  | 2  | 2  | 1  | 0  | 0  |
| 2  | 1  | 0  | 0  | 0  | 1  | 0  | 0  |
| 1  | 0  | 0  | 0  | 0  | 1  | 0  | 0  |
| 1  | 2  | 1  | 0  | 0  | 2  | 1  | 1  |
| 2  | 1  | 0  | 1  | 1  | 2  | 0  | 0  |
| 3  | 0  | 0  | 0  | 0  | 0  | 2  | 2  |
| 4  | 0  | 0  | 0  | 0  | 1  | 0  | 0  |
| 4  | 1  | 1  | 1  | 1  | 99 | 1  | 1  |
| 3  | 1  | 0  | 1  | 1  | 1  | 0  | 1  |
| 2  | 1  | 0  | 1  | 1  | 0  | 1  | 1  |
| 3  | 1  | 0  | 0  | 0  | 1  | 0  | 1  |
| 4  | 0  | 0  | 0  | 0  | 1  | 0  | 0  |
| 2  | 1  | 1  | 0  | 0  | 2  | 0  | 1  |
| 3  | 1  | 1  | 1  | 1  | 1  | 0  | 1  |
| 4  | 1  | 1  | 1  | 1  | 1  | 1  | 0  |
| 4  | 0  | 0  | 0  | 0  | 1  | 0  | 0  |
| 4  | 1  | 0  | 0  | 0  | 2  | 0  | 0  |
| 99 | 99 | 99 | 99 | 99 | 99 | 99 | 99 |
| 3  | 0  | 0  | 0  | 0  | 1  | 0  | 0  |
| 3  | 1  | 0  | 0  | 0  | 1  | 1  | 1  |
| 2  | 1  | 0  | 0  | 0  | 1  | 0  | 0  |
| 4  | 0  | 0  | 0  | 0  | 0  | 1  | 1  |
| 4  | 0  | 0  | 0  | 0  | 1  | 0  | 0  |
| 2  | 1  | 0  | 0  | 0  | 0  | 0  | 0  |
| 4  | 0  | 0  | 0  | 0  | 1  | 0  | 0  |
| 4  | 0  | 0  | 0  | 0  | 1  | 0  | 0  |
| 3  | 1  | 0  | 0  | 0  | 0  | 1  | 2  |
| 1  | 1  | 0  | 0  | 0  | 0  | 1  | 0  |
| 3  | 2  | 1  | 1  | 1  | 2  | 1  | 1  |
| 2  | 0  | 0  | 0  | 0  | 0  | 0  | 0  |
| 3  | 1  | 1  | 0  | 0  | 1  | 0  | 0  |
| 4  | 0  | 0  | 0  | 0  | 2  | 0  | 0  |
| 2  | 0  | 0  | 0  | 0  | 1  | 0  | 0  |
| 1  | 1  | 0  | 0  | 0  | 2  | 0  | 0  |
| 4  | 0  | 0  | 0  | 0  | 1  | 0  | 0  |
| 1  | 0  | 0  | 0  | 0  | 0  | 0  | 0  |
| 2  | 1  | 1  | 1  | 1  | 2  | 0  | 2  |
| 4  | 0  | 0  | 0  | 0  | 1  | 0  | 0  |

|    |    |    |    |    |    |    |    |
|----|----|----|----|----|----|----|----|
| 99 | 0  | 0  | 0  | 0  | 0  | 0  | 0  |
| 4  | 0  | 0  | 0  | 0  | 1  | 0  | 0  |
| 2  | 2  | 2  | 2  | 2  | 2  | 1  | 1  |
| 3  | 1  | 1  | 0  | 0  | 2  | 0  | 0  |
| 1  | 0  | 0  | 0  | 0  | 0  | 0  | 0  |
| 2  | 2  | 0  | 1  | 2  | 2  | 1  | 1  |
| 3  | 1  | 0  | 0  | 0  | 1  | 0  | 0  |
| 4  | 0  | 1  | 0  | 0  | 1  | 0  | 0  |
| 3  | 0  | 0  | 0  | 0  | 2  | 0  | 2  |
| 2  | 1  | 0  | 0  | 0  | 0  | 0  | 0  |
| 3  | 0  | 0  | 0  | 0  | 2  | 0  | 0  |
| 4  | 2  | 2  | 2  | 2  | 1  | 2  | 2  |
| 2  | 1  | 0  | 0  | 0  | 1  | 0  | 0  |
| 3  | 1  | 0  | 0  | 0  | 1  | 0  | 0  |
| 4  | 0  | 0  | 1  | 1  | 99 | 0  | 0  |
| 4  | 0  | 0  | 0  | 0  | 1  | 0  | 0  |
| 1  | 2  | 2  | 2  | 2  | 1  | 0  | 0  |
| 4  | 1  | 0  | 0  | 0  | 2  | 0  | 0  |
| 2  | 0  | 1  | 0  | 0  | 0  | 0  | 0  |
| 1  | 0  | 0  | 0  | 0  | 0  | 0  | 0  |
| 4  | 1  | 0  | 0  | 0  | 2  | 0  | 0  |
| 1  | 1  | 0  | 1  | 1  | 0  | 0  | 0  |
| 2  | 1  | 0  | 1  | 1  | 1  | 1  | 0  |
| 4  | 1  | 0  | 1  | 1  | 0  | 0  | 0  |
| 4  | 1  | 0  | 0  | 0  | 0  | 0  | 0  |
| 4  | 2  | 2  | 2  | 2  | 1  | 1  | 1  |
| 2  | 1  | 1  | 1  | 1  | 2  | 0  | 0  |
| 1  | 1  | 1  | 1  | 1  | 0  | 1  | 1  |
| 99 | 0  | 0  | 0  | 0  | 0  | 0  | 0  |
| 2  | 0  | 0  | 0  | 0  | 0  | 0  | 0  |
| 2  | 0  | 0  | 0  | 0  | 2  | 0  | 1  |
| 2  | 1  | 1  | 0  | 0  | 2  | 0  | 0  |
| 99 | 0  | 0  | 0  | 0  | 0  | 0  | 0  |
| 99 | 0  | 0  | 0  | 0  | 0  | 0  | 0  |
| 3  | 0  | 1  | 1  | 1  | 1  | 0  | 0  |
| 3  | 1  | 1  | 2  | 2  | 2  | 2  | 2  |
| 99 | 2  | 2  | 2  | 2  | 2  | 2  | 2  |
| 4  | 1  | 1  | 0  | 0  | 2  | 0  | 0  |
| 4  | 2  | 1  | 0  | 0  | 2  | 0  | 0  |
| 1  | 0  | 0  | 0  | 0  | 1  | 0  | 0  |
| 2  | 2  | 2  | 2  | 2  | 2  | 2  | 2  |
| 3  | 0  | 0  | 0  | 0  | 0  | 0  | 0  |
| 2  | 2  | 0  | 1  | 2  | 2  | 1  | 2  |
| 99 | 99 | 99 | 99 | 99 | 99 | 99 | 99 |
| 2  | 2  | 2  | 1  | 2  | 2  | 0  | 0  |
| 2  | 2  | 2  | 1  | 1  | 1  | 0  | 0  |
| 1  | 1  | 2  | 0  | 2  | 2  | 0  | 0  |
| 99 | 2  | 0  | 2  | 2  | 2  | 1  | 0  |

|   |   |   |   |   |   |   |
|---|---|---|---|---|---|---|
| 4 | 1 | 0 | 0 | 2 | 0 | 0 |
| 3 | 0 | 0 | 0 | 1 | 0 | 0 |
| 4 | 0 | 0 | 0 | 0 | 0 | 1 |
| 2 | 0 | 0 | 0 | 0 | 0 | 0 |
| 3 | 0 | 0 | 0 | 1 | 0 | 0 |
| 3 | 0 | 0 | 0 | 2 | 0 | 0 |
| 4 | 0 | 0 | 0 | 0 | 0 | 0 |
| 3 | 1 | 1 | 0 | 2 | 1 | 1 |
| 3 | 0 | 0 | 0 | 2 | 0 | 0 |
| 3 | 2 | 2 | 1 | 1 | 2 | 1 |
| 2 | 2 | 2 | 2 | 2 | 1 | 2 |
| 2 | 1 | 1 | 1 | 1 | 1 | 0 |
| 2 | 2 | 2 | 2 | 2 | 1 | 2 |
| 2 | 2 | 2 | 2 | 2 | 2 | 2 |
| 3 | 0 | 0 | 0 | 1 | 0 | 0 |
| 4 | 2 | 0 | 0 | 2 | 1 | 2 |
| 4 | 0 | 0 | 0 | 1 | 0 | 0 |
| 1 | 0 | 0 | 0 | 1 | 0 | 0 |
| 3 | 1 | 0 | 0 | 1 | 0 | 0 |
| 2 | 0 | 0 | 0 | 1 | 1 | 0 |
| 3 | 1 | 1 | 1 | 1 | 1 | 1 |
| 2 | 2 | 1 | 1 | 2 | 0 | 2 |
| 4 | 1 | 0 | 0 | 2 | 0 | 0 |
| 2 | 1 | 0 | 1 | 1 | 0 | 0 |
| 1 | 1 | 1 | 0 | 0 | 0 | 0 |
| 4 | 0 | 0 | 0 | 1 | 0 | 0 |
| 1 | 2 | 1 | 2 | 2 | 2 | 1 |
| 2 | 0 | 1 | 0 | 1 | 0 | 0 |
| 3 | 0 | 0 | 0 | 0 | 0 | 0 |
| 3 | 2 | 0 | 0 | 2 | 0 | 0 |
| 2 | 0 | 0 | 0 | 0 | 0 | 0 |
| 4 | 2 | 1 | 0 | 1 | 1 | 1 |
| 2 | 1 | 0 | 1 | 2 | 0 | 0 |
| 4 | 2 | 2 | 2 | 1 | 0 | 2 |
| 2 | 1 | 1 | 1 | 2 | 0 | 0 |
| 2 | 1 | 0 | 0 | 2 | 0 | 0 |
| 2 | 2 | 1 | 2 | 2 | 1 | 2 |
| 2 | 2 | 0 | 2 | 2 | 0 | 1 |
| 2 | 1 | 1 | 0 | 1 | 0 | 1 |
| 2 | 2 | 1 | 0 | 2 | 0 | 1 |
| 4 | 0 | 0 | 0 | 2 | 0 | 0 |
| 1 | 0 | 0 | 0 | 0 | 0 | 1 |
| 4 | 0 | 0 | 0 | 2 | 0 | 0 |
| 2 | 1 | 0 | 0 | 2 | 0 | 0 |
| 1 | 1 | 1 | 0 | 2 | 1 | 0 |
| 3 | 0 | 0 | 0 | 1 | 1 | 0 |
| 2 | 0 | 0 | 0 | 0 | 0 | 0 |
| 4 | 1 | 0 | 0 | 2 | 1 | 0 |

|    |    |    |    |    |    |    |
|----|----|----|----|----|----|----|
| 4  | 1  | 0  | 0  | 1  | 0  | 0  |
| 3  | 0  | 0  | 0  | 1  | 0  | 0  |
| 4  | 1  | 0  | 0  | 2  | 0  | 1  |
| 3  | 0  | 0  | 0  | 1  | 0  | 0  |
| 2  | 1  | 1  | 0  | 2  | 0  | 0  |
| 2  | 1  | 0  | 1  | 1  | 0  | 0  |
| 99 | 0  | 0  | 0  | 1  | 0  | 0  |
| 4  | 1  | 1  | 0  | 1  | 0  | 0  |
| 2  | 2  | 2  | 0  | 1  | 0  | 2  |
| 2  | 0  | 0  | 0  | 0  | 0  | 0  |
| 4  | 1  | 2  | 1  | 1  | 0  | 2  |
| 4  | 2  | 2  | 2  | 2  | 2  | 2  |
| 4  | 0  | 0  | 0  | 1  | 0  | 0  |
| 2  | 0  | 0  | 0  | 1  | 0  | 0  |
| 99 | 0  | 0  | 0  | 0  | 0  | 0  |
| 3  | 0  | 0  | 0  | 1  | 0  | 1  |
| 4  | 0  | 0  | 0  | 0  | 0  | 0  |
| 2  | 0  | 0  | 0  | 0  | 0  | 0  |
| 3  | 0  | 0  | 0  | 1  | 0  | 0  |
| 2  | 2  | 0  | 0  | 2  | 2  | 1  |
| 3  | 0  | 0  | 0  | 0  | 0  | 0  |
| 4  | 0  | 0  | 0  | 0  | 0  | 0  |
| 4  | 0  | 0  | 0  | 1  | 0  | 0  |
| 2  | 1  | 0  | 1  | 2  | 0  | 0  |
| 99 | 99 | 99 | 99 | 99 | 99 | 99 |
| 2  | 0  | 0  | 0  | 0  | 0  | 0  |
| 1  | 0  | 0  | 0  | 1  | 0  | 0  |
| 2  | 1  | 1  | 1  | 2  | 0  | 0  |
| 4  | 0  | 1  | 0  | 0  | 0  | 0  |
| 4  | 1  | 0  | 0  | 1  | 0  | 0  |
| 2  | 1  | 1  | 2  | 2  | 1  | 0  |
| 3  | 0  | 0  | 0  | 1  | 0  | 0  |
| 4  | 0  | 0  | 0  | 1  | 0  | 0  |
| 1  | 1  | 0  | 1  | 1  | 1  | 1  |
| 2  | 0  | 0  | 0  | 0  | 0  | 0  |
| 1  | 2  | 1  | 0  | 2  | 0  | 2  |
| 3  | 0  | 0  | 0  | 2  | 0  | 0  |
| 2  | 1  | 0  | 1  | 0  | 0  | 0  |
| 4  | 2  | 1  | 1  | 2  | 0  | 2  |
| 4  | 0  | 0  | 1  | 1  | 2  | 0  |
| 4  | 0  | 0  | 0  | 2  | 0  | 0  |
| 3  | 0  | 0  | 0  | 0  | 0  | 0  |
| 99 | 1  | 0  | 1  | 2  | 0  | 0  |
| 2  | 1  | 0  | 1  | 0  | 0  | 0  |
| 1  | 2  | 2  | 2  | 2  | 2  | 2  |
| 4  | 2  | 1  | 2  | 1  | 0  | 1  |
| 3  | 1  | 0  | 1  | 2  | 1  | 2  |
| 2  | 1  | 0  | 0  | 1  | 0  | 0  |

|    |    |    |    |    |    |    |    |
|----|----|----|----|----|----|----|----|
| 4  | 1  | 1  | 1  | 1  | 1  | 1  | 1  |
| 4  | 2  | 0  | 0  | 0  | 2  | 0  | 0  |
| 2  | 1  | 99 | 1  | 1  | 2  | 0  | 0  |
| 3  | 1  | 0  | 1  | 1  | 2  | 1  | 0  |
| 3  | 1  | 2  | 0  | 0  | 2  | 0  | 0  |
| 3  | 1  | 0  | 0  | 0  | 1  | 0  | 0  |
| 2  | 0  | 0  | 0  | 0  | 2  | 0  | 0  |
| 99 | 0  | 0  | 0  | 0  | 1  | 0  | 0  |
| 4  | 1  | 0  | 0  | 0  | 2  | 0  | 0  |
| 2  | 0  | 0  | 0  | 0  | 1  | 0  | 0  |
| 4  | 0  | 0  | 0  | 0  | 0  | 0  | 0  |
| 4  | 0  | 0  | 0  | 0  | 0  | 0  | 0  |
| 2  | 1  | 0  | 0  | 0  | 2  | 0  | 0  |
| 2  | 0  | 0  | 0  | 0  | 1  | 0  | 0  |
| 2  | 99 | 99 | 99 | 99 | 99 | 99 | 99 |
| 4  | 0  | 0  | 0  | 0  | 1  | 0  | 0  |
| 2  | 1  | 0  | 0  | 0  | 2  | 0  | 0  |
| 3  | 1  | 1  | 1  | 1  | 1  | 1  | 1  |
| 2  | 1  | 0  | 0  | 0  | 2  | 0  | 1  |
| 2  | 2  | 1  | 2  | 2  | 2  | 2  | 2  |
| 2  | 0  | 0  | 0  | 0  | 0  | 0  | 0  |
| 4  | 0  | 0  | 0  | 0  | 2  | 0  | 0  |
| 4  | 0  | 0  | 0  | 0  | 0  | 0  | 0  |
| 1  | 2  | 0  | 2  | 2  | 1  | 99 | 0  |
| 3  | 1  | 1  | 0  | 0  | 2  | 1  | 1  |
| 2  | 0  | 0  | 0  | 0  | 1  | 0  | 0  |
| 2  | 2  | 0  | 0  | 0  | 2  | 0  | 0  |
| 99 | 1  | 1  | 1  | 1  | 1  | 0  | 2  |
| 4  | 2  | 0  | 0  | 0  | 1  | 0  | 0  |
| 4  | 2  | 2  | 0  | 0  | 2  | 0  | 0  |
| 3  | 2  | 2  | 2  | 2  | 2  | 2  | 2  |
| 4  | 0  | 0  | 0  | 0  | 0  | 0  | 0  |
| 1  | 0  | 0  | 0  | 0  | 1  | 0  | 0  |
| 2  | 1  | 2  | 1  | 1  | 2  | 1  | 1  |
| 4  | 0  | 0  | 0  | 0  | 1  | 0  | 0  |
| 1  | 0  | 0  | 0  | 0  | 0  | 0  | 0  |
| 3  | 1  | 0  | 0  | 0  | 1  | 0  | 1  |
| 1  | 2  | 0  | 1  | 1  | 2  | 1  | 1  |
| 4  | 2  | 2  | 2  | 2  | 2  | 2  | 2  |
| 1  | 2  | 1  | 2  | 2  | 2  | 0  | 0  |
| 3  | 0  | 0  | 0  | 0  | 0  | 0  | 0  |
| 2  | 2  | 1  | 2  | 2  | 1  | 0  | 1  |
| 3  | 2  | 2  | 1  | 1  | 2  | 2  | 2  |
| 4  | 1  | 1  | 1  | 1  | 1  | 0  | 1  |
| 3  | 1  | 0  | 0  | 0  | 0  | 0  | 0  |
| 4  | 0  | 0  | 0  | 0  | 0  | 0  | 0  |
| 99 | 1  | 1  | 1  | 1  | 2  | 1  | 2  |
| 2  | 0  | 0  | 0  | 0  | 1  | 0  | 1  |

|    |    |    |    |    |    |    |    |
|----|----|----|----|----|----|----|----|
| 4  | 0  | 0  | 0  | 0  | 0  | 0  | 0  |
| 4  | 1  | 0  | 0  | 0  | 1  | 0  | 0  |
| 1  | 1  | 0  | 0  | 0  | 2  | 0  | 0  |
| 4  | 1  | 0  | 1  | 2  | 2  | 0  | 0  |
| 2  | 2  | 1  | 1  | 2  | 2  | 0  | 1  |
| 3  | 1  | 1  | 2  | 2  | 2  | 1  | 1  |
| 4  | 0  | 0  | 0  | 0  | 0  | 0  | 0  |
| 3  | 0  | 0  | 0  | 0  | 0  | 0  | 0  |
| 2  | 1  | 0  | 1  | 2  | 2  | 1  | 0  |
| 4  | 0  | 0  | 0  | 0  | 0  | 0  | 0  |
| 2  | 1  | 0  | 0  | 0  | 99 | 0  | 0  |
| 3  | 0  | 0  | 0  | 0  | 0  | 0  | 0  |
| 3  | 1  | 99 | 2  | 0  | 0  | 0  | 0  |
| 4  | 0  | 0  | 0  | 0  | 0  | 0  | 0  |
| 3  | 1  | 0  | 1  | 2  | 2  | 1  | 1  |
| 4  | 0  | 0  | 0  | 0  | 0  | 0  | 0  |
| 99 | 1  | 0  | 0  | 0  | 1  | 0  | 0  |
| 4  | 1  | 0  | 0  | 0  | 1  | 0  | 0  |
| 4  | 1  | 0  | 0  | 0  | 0  | 0  | 1  |
| 4  | 1  | 1  | 1  | 2  | 2  | 1  | 1  |
| 3  | 2  | 0  | 0  | 2  | 2  | 1  | 1  |
| 4  | 1  | 0  | 1  | 2  | 2  | 2  | 0  |
| 99 | 0  | 0  | 0  | 0  | 0  | 0  | 0  |
| 4  | 0  | 0  | 0  | 0  | 2  | 0  | 0  |
| 3  | 1  | 0  | 0  | 0  | 1  | 0  | 0  |
| 99 | 1  | 0  | 0  | 0  | 0  | 0  | 1  |
| 99 | 99 | 99 | 99 | 99 | 99 | 99 | 99 |
| 2  | 1  | 0  | 0  | 0  | 2  | 0  | 0  |
| 2  | 1  | 1  | 1  | 1  | 1  | 1  | 1  |
| 4  | 1  | 0  | 0  | 0  | 1  | 0  | 0  |
| 99 | 99 | 99 | 99 | 99 | 99 | 99 | 99 |
| 4  | 1  | 0  | 0  | 0  | 1  | 1  | 0  |
| 4  | 1  | 0  | 0  | 0  | 0  | 0  | 0  |
| 4  | 0  | 0  | 0  | 0  | 2  | 0  | 0  |
| 99 | 0  | 0  | 0  | 0  | 0  | 0  | 0  |
| 4  | 0  | 0  | 0  | 0  | 0  | 0  | 0  |
| 4  | 0  | 0  | 0  | 0  | 0  | 0  | 0  |
| 4  | 0  | 0  | 0  | 0  | 0  | 0  | 0  |
| 3  | 1  | 2  | 0  | 2  | 2  | 0  | 0  |
| 4  | 0  | 0  | 0  | 0  | 0  | 0  | 0  |
| 4  | 0  | 0  | 0  | 0  | 0  | 0  | 0  |
| 4  | 0  | 0  | 0  | 0  | 0  | 0  | 0  |
| 4  | 1  | 0  | 0  | 0  | 2  | 0  | 0  |
| 3  | 0  | 0  | 0  | 0  | 2  | 0  | 0  |
| 4  | 1  | 0  | 0  | 0  | 2  | 0  | 0  |
| 1  | 1  | 2  | 0  | 2  | 2  | 0  | 0  |
| 2  | 1  | 1  | 1  | 1  | 1  | 1  | 1  |
| 4  | 0  | 0  | 0  | 0  | 0  | 0  | 0  |
| 1  | 0  | 0  | 0  | 0  | 1  | 0  | 0  |

|    |    |    |    |    |    |    |    |
|----|----|----|----|----|----|----|----|
| 4  | 0  | 0  | 0  | 0  | 0  | 0  | 0  |
| 3  | 2  | 2  | 2  | 2  | 2  | 2  | 2  |
| 1  | 1  | 0  | 1  | 1  | 0  | 1  | 1  |
| 2  | 0  | 0  | 99 | 0  | 1  | 0  | 0  |
| 2  | 0  | 0  | 0  | 1  | 0  | 0  | 0  |
| 4  | 0  | 0  | 0  | 0  | 0  | 0  | 0  |
| 3  | 0  | 1  | 0  | 2  | 0  | 0  | 0  |
| 3  | 2  | 1  | 2  | 1  | 1  | 2  | 2  |
| 4  | 1  | 0  | 0  | 0  | 0  | 0  | 0  |
| 3  | 1  | 0  | 0  | 1  | 0  | 0  | 0  |
| 3  | 0  | 0  | 0  | 0  | 0  | 0  | 0  |
| 3  | 1  | 0  | 0  | 2  | 0  | 2  | 2  |
| 4  | 2  | 2  | 2  | 2  | 2  | 1  | 2  |
| 4  | 1  | 1  | 1  | 1  | 1  | 1  | 0  |
| 3  | 0  | 0  | 0  | 0  | 0  | 0  | 0  |
| 2  | 1  | 1  | 0  | 0  | 0  | 0  | 0  |
| 1  | 99 | 99 | 99 | 99 | 99 | 99 | 99 |
| 4  | 0  | 0  | 0  | 2  | 0  | 0  | 0  |
| 2  | 1  | 1  | 1  | 1  | 1  | 1  | 1  |
| 2  | 2  | 2  | 2  | 2  | 2  | 2  | 0  |
| 1  | 1  | 0  | 0  | 0  | 0  | 0  | 0  |
| 3  | 1  | 0  | 0  | 1  | 0  | 0  | 0  |
| 3  | 0  | 0  | 0  | 0  | 0  | 0  | 0  |
| 3  | 0  | 0  | 0  | 0  | 0  | 0  | 0  |
| 1  | 2  | 1  | 0  | 2  | 1  | 2  | 2  |
| 99 | 0  | 0  | 0  | 0  | 0  | 0  | 0  |
| 4  | 2  | 0  | 0  | 1  | 0  | 0  | 0  |
| 4  | 0  | 0  | 0  | 1  | 0  | 0  | 0  |
| 4  | 0  | 1  | 0  | 1  | 0  | 0  | 0  |
| 3  | 1  | 0  | 2  | 2  | 1  | 0  | 0  |
| 2  | 1  | 0  | 1  | 2  | 0  | 1  | 1  |
| 4  | 0  | 0  | 0  | 1  | 0  | 0  | 0  |
| 99 | 2  | 0  | 0  | 2  | 0  | 0  | 0  |
| 99 | 2  | 2  | 99 | 2  | 2  | 1  | 1  |
| 3  | 1  | 0  | 1  | 1  | 1  | 1  | 1  |
| 99 | 0  | 0  | 0  | 1  | 0  | 0  | 0  |
| 2  | 0  | 0  | 0  | 0  | 0  | 0  | 0  |
| 4  | 2  | 0  | 2  | 2  | 2  | 2  | 2  |
| 3  | 0  | 0  | 0  | 1  | 0  | 1  | 1  |
| 4  | 0  | 0  | 0  | 0  | 0  | 0  | 0  |
| 1  | 2  | 2  | 2  | 2  | 2  | 1  | 2  |
| 3  | 1  | 0  | 0  | 1  | 0  | 0  | 0  |
| 2  | 0  | 1  | 1  | 0  | 0  | 0  | 0  |
| 3  | 1  | 1  | 1  | 2  | 0  | 1  | 1  |
| 4  | 0  | 0  | 0  | 1  | 0  | 0  | 0  |
| 2  | 1  | 0  | 1  | 1  | 0  | 1  | 1  |
| 4  | 1  | 0  | 0  | 1  | 0  | 1  | 1  |
| 3  | 0  | 0  | 0  | 1  | 0  | 0  | 0  |



|    |    |    |    |    |    |    |    |
|----|----|----|----|----|----|----|----|
| 4  | 0  | 0  | 0  | 0  | 0  | 0  | 0  |
| 4  | 0  | 0  | 0  | 0  | 2  | 0  | 1  |
| 99 | 0  | 0  | 0  | 0  | 0  | 0  | 0  |
| 2  | 2  | 2  | 2  | 2  | 1  | 1  | 1  |
| 4  | 0  | 0  | 0  | 0  | 2  | 0  | 0  |
| 3  | 1  | 0  | 0  | 0  | 2  | 0  | 0  |
| 4  | 0  | 0  | 0  | 0  | 0  | 0  | 0  |
| 2  | 2  | 0  | 1  | 1  | 2  | 1  | 0  |
| 99 | 2  | 0  | 0  | 0  | 2  | 1  | 0  |
| 2  | 2  | 0  | 0  | 0  | 2  | 0  | 0  |
| 4  | 0  | 0  | 0  | 0  | 2  | 0  | 0  |
| 2  | 0  | 1  | 1  | 1  | 2  | 1  | 2  |
| 2  | 1  | 1  | 1  | 1  | 2  | 0  | 0  |
| 2  | 1  | 0  | 0  | 0  | 1  | 0  | 0  |
| 4  | 1  | 0  | 0  | 0  | 1  | 0  | 1  |
| 4  | 99 | 99 | 99 | 99 | 99 | 99 | 99 |
| 3  | 0  | 0  | 0  | 0  | 2  | 0  | 0  |
| 2  | 2  | 1  | 1  | 1  | 2  | 1  | 2  |
| 2  | 2  | 0  | 2  | 2  | 2  | 1  | 0  |
| 3  | 0  | 0  | 0  | 0  | 1  | 0  | 0  |
| 2  | 1  | 1  | 1  | 1  | 2  | 1  | 0  |
| 3  | 2  | 1  | 2  | 2  | 1  | 2  | 2  |
| 2  | 0  | 0  | 0  | 0  | 0  | 0  | 0  |
| 2  | 1  | 2  | 0  | 0  | 1  | 0  | 0  |
| 1  | 0  | 0  | 1  | 1  | 1  | 0  | 99 |
| 4  | 0  | 0  | 0  | 0  | 0  | 0  | 0  |
| 2  | 0  | 0  | 0  | 0  | 0  | 0  | 0  |
| 1  | 1  | 1  | 0  | 0  | 1  | 0  | 0  |
| 4  | 1  | 1  | 1  | 1  | 2  | 1  | 1  |
| 1  | 0  | 0  | 0  | 0  | 0  | 0  | 0  |
| 2  | 0  | 0  | 0  | 0  | 1  | 0  | 0  |
| 3  | 0  | 0  | 0  | 0  | 0  | 0  | 0  |
| 3  | 0  | 0  | 0  | 0  | 0  | 0  | 0  |
| 3  | 99 | 0  | 99 | 99 | 99 | 99 | 99 |
| 3  | 1  | 0  | 0  | 0  | 0  | 0  | 0  |
| 4  | 0  | 0  | 99 | 1  | 0  | 0  | 0  |
| 3  | 0  | 0  | 0  | 0  | 0  | 0  | 0  |
| 3  | 0  | 0  | 0  | 0  | 1  | 0  | 0  |
| 2  | 1  | 0  | 1  | 0  | 0  | 0  | 1  |
| 4  | 0  | 0  | 0  | 0  | 2  | 0  | 0  |
| 4  | 0  | 0  | 0  | 0  | 0  | 0  | 0  |
| 4  | 1  | 1  | 2  | 1  | 1  | 0  | 1  |
| 99 | 2  | 1  | 0  | 0  | 1  | 1  | 2  |
| 1  | 2  | 1  | 0  | 0  | 1  | 1  | 0  |
| 99 | 0  | 0  | 0  | 0  | 99 | 99 | 99 |
| 3  | 0  | 0  | 0  | 0  | 1  | 0  | 0  |
| 4  | 0  | 0  | 0  | 0  | 0  | 0  | 0  |
| 2  | 1  | 1  | 2  | 2  | 2  | 0  | 0  |

|    |   |    |    |    |   |    |
|----|---|----|----|----|---|----|
| 3  | 0 | 0  | 0  | 1  | 0 | 0  |
| 4  | 0 | 0  | 0  | 2  | 0 | 0  |
| 3  | 0 | 0  | 1  | 2  | 0 | 0  |
| 4  | 0 | 0  | 0  | 1  | 1 | 2  |
| 4  | 0 | 0  | 0  | 0  | 0 | 0  |
| 4  | 0 | 0  | 0  | 0  | 0 | 0  |
| 4  | 0 | 0  | 0  | 1  | 0 | 0  |
| 3  | 1 | 1  | 2  | 1  | 0 | 0  |
| 3  | 0 | 0  | 0  | 1  | 0 | 1  |
| 2  | 0 | 0  | 2  | 2  | 2 | 0  |
| 4  | 1 | 1  | 99 | 2  | 0 | 1  |
| 3  | 1 | 99 | 1  | 2  | 0 | 0  |
| 3  | 0 | 0  | 0  | 1  | 0 | 0  |
| 3  | 1 | 2  | 99 | 2  | 1 | 2  |
| 99 | 1 | 1  | 0  | 1  | 0 | 0  |
| 3  | 0 | 0  | 0  | 2  | 0 | 0  |
| 4  | 1 | 1  | 1  | 0  | 0 | 0  |
| 4  | 0 | 0  | 1  | 0  | 1 | 99 |
| 4  | 1 | 0  | 0  | 1  | 0 | 0  |
| 99 | 0 | 0  | 0  | 0  | 0 | 0  |
| 4  | 2 | 2  | 2  | 2  | 1 | 2  |
| 4  | 0 | 0  | 0  | 0  | 0 | 0  |
| 1  | 1 | 0  | 0  | 2  | 0 | 0  |
| 1  | 0 | 0  | 0  | 1  | 0 | 0  |
| 3  | 1 | 0  | 0  | 2  | 0 | 0  |
| 3  | 2 | 1  | 1  | 2  | 1 | 1  |
| 2  | 1 | 0  | 1  | 2  | 1 | 1  |
| 4  | 0 | 0  | 0  | 0  | 0 | 0  |
| 3  | 0 | 0  | 0  | 1  | 0 | 0  |
| 2  | 2 | 1  | 0  | 2  | 1 | 1  |
| 4  | 0 | 0  | 0  | 1  | 0 | 0  |
| 2  | 2 | 0  | 0  | 99 | 1 | 0  |
| 4  | 0 | 0  | 0  | 0  | 0 | 0  |
| 3  | 2 | 2  | 2  | 2  | 2 | 2  |
| 3  | 0 | 0  | 0  | 0  | 0 | 0  |
| 4  | 0 | 0  | 0  | 1  | 0 | 0  |
| 4  | 0 | 0  | 0  | 0  | 0 | 0  |
| 99 | 0 | 0  | 0  | 1  | 0 | 0  |
| 2  | 0 | 0  | 0  | 0  | 0 | 0  |
| 4  | 0 | 0  | 0  | 0  | 0 | 0  |
| 2  | 0 | 0  | 0  | 1  | 0 | 0  |
| 4  | 2 | 2  | 2  | 2  | 2 | 2  |
| 2  | 0 | 0  | 0  | 1  | 0 | 0  |
| 4  | 1 | 0  | 0  | 2  | 0 | 0  |
| 2  | 1 | 0  | 0  | 1  | 1 | 0  |
| 4  | 0 | 0  | 0  | 1  | 0 | 0  |
| 2  | 1 | 0  | 1  | 1  | 1 | 0  |
| 4  | 1 | 0  | 0  | 1  | 0 | 1  |

|    |    |    |    |    |    |    |
|----|----|----|----|----|----|----|
| 2  | 1  | 0  | 0  | 1  | 0  | 2  |
| 99 | 0  | 0  | 0  | 0  | 0  | 0  |
| 2  | 1  | 0  | 0  | 1  | 99 | 99 |
| 3  | 1  | 0  | 0  | 0  | 0  | 0  |
| 2  | 2  | 1  | 2  | 2  | 1  | 2  |
| 4  | 0  | 0  | 0  | 1  | 0  | 1  |
| 3  | 1  | 1  | 0  | 2  | 0  | 0  |
| 4  | 2  | 1  | 0  | 2  | 0  | 0  |
| 3  | 0  | 0  | 0  | 1  | 0  | 0  |
| 4  | 0  | 0  | 1  | 1  | 0  | 2  |
| 2  | 1  | 1  | 0  | 1  | 0  | 1  |
| 4  | 0  | 0  | 2  | 0  | 2  | 2  |
| 99 | 99 | 99 | 99 | 99 | 99 | 99 |
| 2  | 0  | 0  | 0  | 1  | 0  | 0  |
| 3  | 0  | 0  | 0  | 0  | 0  | 0  |
| 1  | 1  | 1  | 1  | 1  | 1  | 0  |
| 1  | 2  | 2  | 2  | 2  | 1  | 2  |
| 2  | 1  | 0  | 2  | 2  | 0  | 0  |
| 3  | 1  | 0  | 2  | 1  | 0  | 0  |
| 2  | 2  | 1  | 1  | 2  | 1  | 2  |
| 3  | 0  | 0  | 0  | 0  | 0  | 0  |
| 2  | 0  | 0  | 0  | 1  | 0  | 0  |
| 4  | 0  | 0  | 0  | 1  | 0  | 0  |
| 2  | 2  | 2  | 2  | 2  | 1  | 2  |
| 3  | 0  | 0  | 0  | 1  | 0  | 0  |
| 2  | 1  | 0  | 1  | 1  | 0  | 0  |
| 4  | 1  | 0  | 0  | 2  | 2  | 2  |
| 4  | 1  | 1  | 0  | 2  | 0  | 1  |
| 2  | 0  | 0  | 0  | 0  | 0  | 0  |
| 4  | 0  | 0  | 0  | 0  | 0  | 0  |
| 1  | 1  | 2  | 2  | 1  | 2  | 2  |
| 4  | 0  | 0  | 0  | 1  | 0  | 0  |
| 4  | 1  | 0  | 0  | 2  | 0  | 0  |
| 1  | 1  | 0  | 0  | 2  | 1  | 0  |
| 2  | 1  | 1  | 1  | 1  | 0  | 0  |
| 3  | 0  | 0  | 0  | 0  | 0  | 0  |
| 1  | 1  | 1  | 1  | 2  | 1  | 0  |
| 2  | 0  | 0  | 0  | 1  | 0  | 0  |
| 4  | 1  | 2  | 0  | 1  | 0  | 2  |
| 1  | 0  | 0  | 0  | 1  | 0  | 0  |
| 2  | 1  | 1  | 1  | 2  | 1  | 0  |
| 1  | 0  | 0  | 0  | 0  | 0  | 0  |
| 3  | 1  | 0  | 0  | 2  | 0  | 1  |
| 99 | 0  | 0  | 0  | 1  | 0  | 0  |
| 3  | 0  | 0  | 0  | 1  | 0  | 0  |
| 4  | 0  | 0  | 0  | 1  | 0  | 0  |
| 3  | 0  | 0  | 0  | 1  | 0  | 0  |
| 4  | 0  | 0  | 0  | 1  | 0  | 0  |

|    |   |   |    |    |   |   |
|----|---|---|----|----|---|---|
| 4  | 1 | 0 | 0  | 1  | 0 | 1 |
| 3  | 1 | 1 | 1  | 0  | 0 | 0 |
| 3  | 1 | 0 | 0  | 1  | 0 | 0 |
| 2  | 1 | 0 | 0  | 1  | 0 | 0 |
| 4  | 1 | 1 | 0  | 1  | 0 | 0 |
| 2  | 0 | 0 | 0  | 0  | 0 | 0 |
| 3  | 0 | 0 | 0  | 0  | 0 | 0 |
| 1  | 1 | 0 | 0  | 1  | 0 | 0 |
| 4  | 0 | 0 | 0  | 1  | 0 | 0 |
| 4  | 0 | 0 | 0  | 0  | 0 | 0 |
| 3  | 0 | 0 | 0  | 1  | 0 | 0 |
| 4  | 1 | 1 | 0  | 2  | 0 | 0 |
| 2  | 0 | 0 | 0  | 1  | 0 | 0 |
| 4  | 0 | 0 | 0  | 2  | 0 | 0 |
| 4  | 0 | 0 | 0  | 0  | 0 | 0 |
| 2  | 2 | 1 | 1  | 2  | 1 | 1 |
| 2  | 0 | 1 | 0  | 1  | 0 | 0 |
| 4  | 0 | 1 | 0  | 2  | 0 | 2 |
| 1  | 0 | 0 | 0  | 2  | 1 | 0 |
| 4  | 0 | 0 | 0  | 1  | 0 | 0 |
| 2  | 1 | 0 | 0  | 2  | 0 | 0 |
| 1  | 2 | 0 | 0  | 0  | 0 | 0 |
| 1  | 0 | 0 | 0  | 1  | 0 | 0 |
| 3  | 1 | 0 | 1  | 1  | 1 | 0 |
| 3  | 0 | 0 | 0  | 1  | 0 | 0 |
| 3  | 0 | 0 | 1  | 1  | 0 | 0 |
| 4  | 0 | 0 | 0  | 0  | 0 | 0 |
| 3  | 0 | 1 | 99 | 0  | 0 | 0 |
| 3  | 1 | 0 | 0  | 0  | 0 | 1 |
| 3  | 1 | 0 | 0  | 0  | 0 | 0 |
| 2  | 1 | 1 | 0  | 2  | 0 | 0 |
| 3  | 0 | 0 | 1  | 2  | 0 | 1 |
| 99 | 0 | 0 | 0  | 99 | 0 | 0 |
| 2  | 2 | 1 | 1  | 2  | 0 | 1 |
| 2  | 1 | 1 | 1  | 2  | 0 | 1 |
| 2  | 1 | 1 | 1  | 2  | 0 | 0 |
| 99 | 0 | 0 | 0  | 1  | 0 | 0 |
| 3  | 1 | 1 | 1  | 1  | 1 | 1 |
| 99 | 1 | 0 | 1  | 1  | 0 | 0 |
| 2  | 1 | 0 | 0  | 0  | 0 | 2 |
| 99 | 0 | 0 | 0  | 2  | 0 | 0 |
| 99 | 1 | 1 | 1  | 1  | 1 | 1 |
| 3  | 1 | 0 | 0  | 1  | 0 | 0 |
| 3  | 1 | 0 | 0  | 2  | 0 | 1 |
| 2  | 0 | 0 | 0  | 1  | 0 | 0 |
| 4  | 1 | 0 | 0  | 0  | 0 | 0 |
| 1  | 1 | 2 | 1  | 2  | 1 | 0 |
| 4  | 2 | 2 | 2  | 2  | 2 | 2 |

|    |   |   |   |    |    |    |
|----|---|---|---|----|----|----|
| 4  | 1 | 1 | 0 | 0  | 1  | 0  |
| 2  | 0 | 0 | 0 | 2  | 0  | 0  |
| 3  | 0 | 0 | 0 | 1  | 0  | 1  |
| 4  | 0 | 0 | 0 | 2  | 0  | 0  |
| 1  | 0 | 0 | 0 | 1  | 0  | 0  |
| 3  | 2 | 2 | 2 | 2  | 2  | 2  |
| 3  | 0 | 0 | 0 | 1  | 0  | 0  |
| 2  | 1 | 0 | 0 | 0  | 0  | 0  |
| 4  | 0 | 0 | 0 | 1  | 0  | 0  |
| 99 | 0 | 0 | 0 | 1  | 0  | 0  |
| 2  | 1 | 0 | 0 | 2  | 0  | 0  |
| 3  | 1 | 1 | 1 | 1  | 1  | 1  |
| 2  | 2 | 0 | 1 | 1  | 1  | 0  |
| 3  | 1 | 1 | 1 | 1  | 1  | 0  |
| 2  | 2 | 2 | 1 | 2  | 1  | 1  |
| 1  | 1 | 1 | 1 | 1  | 1  | 1  |
| 3  | 0 | 0 | 0 | 1  | 0  | 0  |
| 2  | 0 | 0 | 0 | 2  | 0  | 0  |
| 3  | 1 | 0 | 1 | 1  | 1  | 1  |
| 4  | 1 | 1 | 1 | 99 | 0  | 2  |
| 2  | 1 | 1 | 1 | 1  | 1  | 1  |
| 4  | 0 | 0 | 0 | 0  | 0  | 0  |
| 3  | 0 | 0 | 0 | 1  | 0  | 0  |
| 2  | 0 | 0 | 0 | 0  | 0  | 0  |
| 4  | 2 | 2 | 0 | 99 | 0  | 0  |
| 1  | 1 | 1 | 1 | 1  | 1  | 1  |
| 1  | 1 | 0 | 0 | 0  | 0  | 0  |
| 2  | 2 | 2 | 2 | 1  | 2  | 2  |
| 2  | 1 | 0 | 1 | 2  | 1  | 1  |
| 4  | 2 | 1 | 1 | 1  | 1  | 1  |
| 1  | 2 | 0 | 1 | 1  | 1  | 1  |
| 2  | 0 | 0 | 0 | 1  | 0  | 0  |
| 3  | 1 | 1 | 0 | 1  | 1  | 0  |
| 3  | 1 | 0 | 1 | 1  | 0  | 0  |
| 4  | 1 | 0 | 2 | 2  | 0  | 1  |
| 2  | 1 | 1 | 1 | 1  | 1  | 1  |
| 2  | 0 | 0 | 0 | 0  | 0  | 0  |
| 2  | 1 | 0 | 1 | 2  | 0  | 2  |
| 1  | 2 | 1 | 1 | 2  | 0  | 1  |
| 3  | 1 | 0 | 0 | 1  | 0  | 0  |
| 3  | 2 | 2 | 2 | 2  | 2  | 2  |
| 3  | 2 | 1 | 2 | 2  | 2  | 2  |
| 4  | 0 | 1 | 0 | 1  | 99 | 99 |
| 2  | 2 | 2 | 2 | 1  | 1  | 1  |
| 4  | 1 | 0 | 1 | 1  | 1  | 1  |
| 2  | 1 | 0 | 0 | 2  | 1  | 0  |
| 2  | 1 | 0 | 0 | 1  | 0  | 1  |
| 1  | 2 | 1 | 1 | 2  | 0  | 1  |

|    |    |    |    |    |    |    |
|----|----|----|----|----|----|----|
| 4  | 1  | 1  | 1  | 1  | 0  | 0  |
| 4  | 1  | 0  | 0  | 1  | 0  | 0  |
| 3  | 0  | 0  | 0  | 1  | 0  | 0  |
| 4  | 0  | 0  | 0  | 0  | 0  | 0  |
| 99 | 99 | 99 | 99 | 99 | 99 | 99 |
| 2  | 2  | 1  | 1  | 2  | 1  | 1  |
| 2  | 0  | 0  | 0  | 2  | 0  | 1  |
| 4  | 0  | 0  | 0  | 2  | 0  | 0  |
| 4  | 0  | 0  | 0  | 1  | 0  | 1  |
| 4  | 0  | 0  | 0  | 0  | 0  | 0  |
| 2  | 1  | 0  | 1  | 1  | 1  | 1  |
| 4  | 0  | 0  | 0  | 1  | 0  | 0  |
| 2  | 0  | 0  | 0  | 1  | 0  | 0  |
| 3  | 0  | 0  | 0  | 1  | 0  | 0  |
| 3  | 0  | 0  | 0  | 1  | 0  | 0  |
| 4  | 2  | 2  | 2  | 2  | 2  | 2  |
| 4  | 0  | 0  | 0  | 2  | 1  | 1  |
| 3  | 1  | 0  | 0  | 2  | 1  | 0  |
| 4  | 2  | 2  | 1  | 2  | 1  | 2  |
| 2  | 1  | 0  | 0  | 1  | 0  | 0  |
| 2  | 0  | 1  | 0  | 0  | 0  | 0  |
| 2  | 0  | 0  | 0  | 2  | 0  | 0  |
| 3  | 1  | 0  | 0  | 1  | 0  | 1  |
| 4  | 0  | 0  | 0  | 1  | 0  | 1  |
| 3  | 0  | 0  | 0  | 2  | 1  | 0  |
| 3  | 0  | 0  | 0  | 1  | 1  | 1  |
| 2  | 1  | 0  | 1  | 1  | 1  | 0  |
| 4  | 0  | 0  | 0  | 1  | 0  | 0  |
| 4  | 0  | 0  | 0  | 2  | 0  | 0  |
| 4  | 0  | 0  | 0  | 0  | 0  | 0  |
| 3  | 1  | 0  | 0  | 2  | 1  | 0  |
| 2  | 0  | 0  | 0  | 1  | 0  | 0  |
| 4  | 0  | 0  | 0  | 1  | 0  | 0  |
| 2  | 0  | 0  | 0  | 0  | 0  | 0  |
| 3  | 0  | 0  | 0  | 0  | 0  | 0  |
| 1  | 0  | 0  | 0  | 0  | 0  | 0  |
| 3  | 0  | 0  | 0  | 0  | 0  | 0  |
| 1  | 2  | 1  | 2  | 2  | 2  | 0  |
| 4  | 0  | 0  | 0  | 1  | 0  | 0  |
| 4  | 0  | 0  | 0  | 1  | 0  | 0  |
| 2  | 0  | 0  | 0  | 1  | 0  | 0  |
| 4  | 0  | 0  | 0  | 0  | 0  | 0  |
| 4  | 1  | 1  | 1  | 1  | 1  | 1  |
| 3  | 1  | 0  | 2  | 2  | 1  | 2  |
| 4  | 1  | 0  | 0  | 1  | 0  | 0  |
| 4  | 0  | 0  | 0  | 2  | 0  | 1  |
| 2  | 0  | 1  | 1  | 1  | 0  | 1  |
| 2  | 0  | 0  | 0  | 0  | 0  | 0  |

|    |    |   |    |   |    |   |
|----|----|---|----|---|----|---|
| 4  | 1  | 1 | 1  | 2 | 1  | 2 |
| 99 | 0  | 0 | 0  | 0 | 0  | 1 |
| 1  | 0  | 0 | 0  | 0 | 0  | 0 |
| 3  | 1  | 0 | 0  | 1 | 0  | 1 |
| 3  | 0  | 0 | 0  | 1 | 0  | 1 |
| 4  | 1  | 0 | 0  | 1 | 0  | 0 |
| 3  | 1  | 1 | 1  | 1 | 0  | 0 |
| 3  | 99 | 0 | 0  | 2 | 0  | 0 |
| 2  | 0  | 0 | 0  | 0 | 0  | 0 |
| 3  | 0  | 0 | 0  | 1 | 0  | 0 |
| 3  | 0  | 0 | 0  | 1 | 0  | 0 |
| 4  | 1  | 0 | 1  | 1 | 0  | 1 |
| 4  | 2  | 1 | 0  | 2 | 0  | 0 |
| 2  | 1  | 1 | 1  | 2 | 0  | 0 |
| 4  | 0  | 0 | 0  | 1 | 0  | 0 |
| 1  | 0  | 0 | 0  | 2 | 0  | 0 |
| 1  | 1  | 0 | 1  | 1 | 0  | 0 |
| 2  | 0  | 0 | 0  | 1 | 0  | 0 |
| 1  | 1  | 0 | 0  | 1 | 0  | 1 |
| 3  | 1  | 0 | 0  | 1 | 1  | 0 |
| 2  | 1  | 0 | 0  | 0 | 0  | 0 |
| 2  | 2  | 1 | 2  | 0 | 2  | 2 |
| 4  | 1  | 0 | 99 | 1 | 0  | 0 |
| 4  | 2  | 2 | 2  | 2 | 2  | 2 |
| 2  | 0  | 0 | 0  | 0 | 0  | 0 |
| 3  | 0  | 0 | 0  | 0 | 0  | 0 |
| 99 | 0  | 0 | 0  | 1 | 0  | 0 |
| 3  | 1  | 0 | 0  | 1 | 99 | 0 |
| 4  | 1  | 1 | 1  | 2 | 0  | 1 |
| 2  | 1  | 0 | 0  | 1 | 0  | 0 |
| 3  | 0  | 0 | 0  | 0 | 0  | 0 |
| 2  | 0  | 0 | 0  | 2 | 0  | 1 |
| 2  | 0  | 0 | 0  | 2 | 0  | 0 |
| 2  | 1  | 1 | 0  | 0 | 1  | 0 |
| 4  | 0  | 0 | 0  | 1 | 0  | 0 |
| 3  | 1  | 0 | 1  | 1 | 1  | 0 |
| 3  | 0  | 0 | 0  | 0 | 0  | 0 |
| 2  | 0  | 0 | 0  | 1 | 0  | 1 |
| 4  | 0  | 0 | 0  | 1 | 0  | 0 |
| 2  | 1  | 1 | 1  | 1 | 0  | 0 |
| 4  | 1  | 0 | 0  | 1 | 0  | 0 |
| 3  | 0  | 0 | 0  | 1 | 0  | 0 |
| 4  | 0  | 1 | 0  | 1 | 0  | 0 |
| 4  | 2  | 2 | 0  | 1 | 2  | 0 |
| 2  | 0  | 0 | 2  | 2 | 1  | 2 |
| 3  | 0  | 0 | 0  | 0 | 0  | 0 |
| 3  | 0  | 0 | 0  | 2 | 0  | 0 |
| 3  | 0  | 0 | 0  | 1 | 0  | 0 |

|    |    |    |    |    |    |    |
|----|----|----|----|----|----|----|
| 4  | 1  | 0  | 1  | 2  | 0  | 0  |
| 3  | 1  | 0  | 1  | 2  | 0  | 0  |
| 3  | 1  | 0  | 0  | 1  | 1  | 2  |
| 3  | 0  | 1  | 0  | 1  | 0  | 1  |
| 99 | 99 | 99 | 99 | 99 | 99 | 99 |
| 3  | 1  | 1  | 1  | 1  | 0  | 1  |
| 4  | 2  | 2  | 2  | 2  | 2  | 2  |
| 2  | 0  | 0  | 0  | 0  | 0  | 0  |
| 2  | 0  | 0  | 0  | 0  | 0  | 0  |
| 2  | 1  | 1  | 0  | 2  | 0  | 0  |
| 3  | 1  | 1  | 1  | 2  | 1  | 1  |
| 2  | 1  | 0  | 0  | 2  | 0  | 0  |
| 3  | 1  | 1  | 2  | 2  | 0  | 0  |
| 4  | 2  | 1  | 1  | 2  | 1  | 0  |
| 2  | 0  | 0  | 0  | 0  | 0  | 0  |
| 3  | 2  | 2  | 2  | 2  | 1  | 2  |
| 3  | 0  | 0  | 0  | 0  | 0  | 0  |
| 3  | 0  | 0  | 0  | 2  | 0  | 0  |
| 1  | 0  | 0  | 0  | 1  | 0  | 0  |
| 1  | 0  | 0  | 1  | 1  | 0  | 1  |
| 1  | 0  | 0  | 0  | 0  | 0  | 0  |
| 3  | 2  | 0  | 0  | 2  | 1  | 0  |
| 4  | 1  | 1  | 1  | 1  | 0  | 1  |
| 2  | 2  | 2  | 2  | 2  | 1  | 1  |
| 4  | 2  | 1  | 1  | 2  | 0  | 0  |
| 1  | 2  | 2  | 2  | 2  | 2  | 2  |
| 2  | 1  | 1  | 0  | 2  | 0  | 0  |
| 2  | 0  | 0  | 0  | 0  | 0  | 0  |
| 1  | 1  | 0  | 0  | 2  | 0  | 0  |
| 2  | 0  | 0  | 1  | 1  | 0  | 0  |
| 4  | 1  | 0  | 1  | 2  | 0  | 1  |
| 1  | 1  | 0  | 1  | 1  | 0  | 1  |
| 3  | 2  | 1  | 2  | 2  | 2  | 1  |
| 4  | 0  | 0  | 0  | 0  | 0  | 0  |
| 2  | 0  | 0  | 0  | 0  | 0  | 0  |
| 2  | 0  | 0  | 0  | 1  | 0  | 0  |
| 4  | 1  | 1  | 1  | 2  | 1  | 1  |
| 4  | 2  | 1  | 2  | 1  | 1  | 2  |
| 2  | 0  | 0  | 0  | 1  | 0  | 0  |
| 3  | 1  | 0  | 0  | 1  | 0  | 1  |
| 3  | 1  | 1  | 2  | 2  | 1  | 1  |
| 1  | 0  | 0  | 0  | 2  | 1  | 0  |
| 3  | 0  | 0  | 2  | 2  | 0  | 1  |
| 3  | 1  | 1  | 1  | 1  | 1  | 1  |
| 4  | 2  | 0  | 2  | 2  | 2  | 0  |
| 2  | 2  | 0  | 0  | 2  | 1  | 1  |
| 1  | 2  | 0  | 1  | 2  | 0  | 0  |
| 4  | 0  | 0  | 0  | 0  | 0  | 0  |



|    |    |    |    |    |    |    |
|----|----|----|----|----|----|----|
| 2  | 0  | 0  | 1  | 2  | 0  | 1  |
| 4  | 0  | 0  | 0  | 1  | 0  | 0  |
| 3  | 1  | 0  | 0  | 2  | 0  | 0  |
| 4  | 0  | 0  | 0  | 1  | 0  | 0  |
| 4  | 0  | 0  | 0  | 0  | 0  | 0  |
| 4  | 1  | 0  | 1  | 2  | 0  | 0  |
| 3  | 0  | 0  | 0  | 0  | 0  | 0  |
| 3  | 0  | 0  | 0  | 1  | 0  | 0  |
| 4  | 1  | 1  | 0  | 1  | 0  | 0  |
| 2  | 1  | 2  | 2  | 1  | 1  | 2  |
| 3  | 0  | 0  | 0  | 2  | 0  | 0  |
| 3  | 0  | 0  | 0  | 1  | 0  | 0  |
| 3  | 1  | 1  | 1  | 1  | 1  | 1  |
| 2  | 1  | 0  | 0  | 2  | 0  | 0  |
| 4  | 1  | 0  | 0  | 0  | 0  | 0  |
| 4  | 0  | 0  | 0  | 0  | 0  | 0  |
| 4  | 1  | 0  | 0  | 1  | 0  | 0  |
| 4  | 0  | 0  | 0  | 2  | 0  | 0  |
| 2  | 0  | 0  | 0  | 2  | 0  | 0  |
| 99 | 0  | 0  | 0  | 1  | 0  | 0  |
| 4  | 1  | 1  | 1  | 2  | 2  | 1  |
| 2  | 0  | 0  | 0  | 0  | 0  | 0  |
| 1  | 1  | 1  | 0  | 1  | 1  | 1  |
| 3  | 0  | 0  | 0  | 1  | 0  | 0  |
| 2  | 0  | 0  | 0  | 0  | 0  | 0  |
| 4  | 1  | 0  | 2  | 2  | 0  | 0  |
| 3  | 1  | 1  | 2  | 2  | 1  | 0  |
| 2  | 1  | 1  | 1  | 1  | 1  | 1  |
| 99 | 0  | 0  | 1  | 1  | 0  | 0  |
| 4  | 1  | 1  | 0  | 0  | 0  | 0  |
| 3  | 0  | 0  | 0  | 1  | 0  | 0  |
| 3  | 0  | 1  | 1  | 2  | 1  | 0  |
| 3  | 1  | 1  | 1  | 2  | 1  | 1  |
| 1  | 1  | 1  | 1  | 1  | 1  | 1  |
| 4  | 1  | 0  | 0  | 2  | 0  | 0  |
| 3  | 1  | 1  | 0  | 2  | 0  | 1  |
| 2  | 1  | 0  | 1  | 2  | 1  | 0  |
| 2  | 2  | 2  | 99 | 2  | 1  | 2  |
| 3  | 2  | 0  | 0  | 2  | 0  | 0  |
| 4  | 1  | 1  | 1  | 1  | 0  | 1  |
| 1  | 2  | 0  | 0  | 2  | 0  | 1  |
| 4  | 2  | 0  | 0  | 2  | 0  | 2  |
| 99 | 99 | 99 | 99 | 99 | 99 | 99 |
| 1  | 0  | 1  | 1  | 0  | 0  | 0  |
| 4  | 0  | 0  | 0  | 2  | 0  | 1  |
| 4  | 2  | 0  | 0  | 2  | 0  | 2  |
| 2  | 1  | 1  | 1  | 2  | 1  | 1  |
| 2  | 1  | 1  | 0  | 1  | 1  | 0  |

|   |    |    |    |    |    |    |
|---|----|----|----|----|----|----|
| 2 | 0  | 0  | 0  | 1  | 0  | 0  |
| 3 | 1  | 0  | 1  | 2  | 0  | 0  |
| 3 | 0  | 0  | 0  | 1  | 0  | 0  |
| 1 | 0  | 1  | 1  | 2  | 0  | 0  |
| 1 | 0  | 0  | 0  | 1  | 0  | 0  |
| 2 | 0  | 0  | 1  | 2  | 2  | 0  |
| 2 | 0  | 0  | 0  | 1  | 0  | 0  |
| 3 | 2  | 2  | 2  | 2  | 2  | 2  |
| 2 | 2  | 0  | 0  | 2  | 0  | 2  |
| 2 | 0  | 0  | 0  | 2  | 0  | 0  |
| 2 | 0  | 0  | 0  | 0  | 0  | 0  |
| 1 | 1  | 0  | 0  | 2  | 0  | 0  |
| 2 | 0  | 0  | 0  | 0  | 0  | 0  |
| 2 | 0  | 0  | 0  | 2  | 0  | 0  |
| 2 | 0  | 0  | 0  | 2  | 1  | 1  |
| 2 | 1  | 0  | 0  | 2  | 1  | 1  |
| 2 | 1  | 0  | 1  | 2  | 0  | 0  |
| 2 | 0  | 0  | 0  | 1  | 0  | 0  |
| 2 | 1  | 0  | 0  | 0  | 0  | 0  |
| 1 | 0  | 2  | 0  | 1  | 0  | 2  |
| 4 | 1  | 0  | 0  | 1  | 0  | 1  |
| 3 | 1  | 0  | 99 | 2  | 99 | 99 |
| 2 | 1  | 0  | 0  | 0  | 0  | 0  |
| 2 | 0  | 0  | 2  | 2  | 1  | 0  |
| 4 | 1  | 1  | 0  | 1  | 1  | 0  |
| 2 | 0  | 0  | 0  | 0  | 0  | 0  |
| 2 | 0  | 0  | 0  | 1  | 0  | 99 |
| 4 | 99 | 99 | 99 | 99 | 99 | 99 |
| 3 | 2  | 2  | 2  | 0  | 2  | 2  |
| 4 | 1  | 0  | 0  | 2  | 1  | 0  |
| 3 | 99 | 99 | 99 | 99 | 99 | 99 |
| 1 | 2  | 1  | 2  | 2  | 2  | 2  |
| 2 | 1  | 0  | 0  | 1  | 0  | 0  |
| 3 | 2  | 2  | 1  | 1  | 1  | 0  |
| 4 | 2  | 0  | 0  | 2  | 2  | 1  |
| 3 | 2  | 2  | 2  | 2  | 1  | 1  |
| 3 | 1  | 0  | 0  | 1  | 0  | 0  |
| 2 | 2  | 1  | 2  | 2  | 1  | 1  |
| 4 | 1  | 1  | 1  | 2  | 2  | 1  |
| 1 | 0  | 0  | 0  | 2  | 0  | 0  |
| 4 | 1  | 1  | 1  | 1  | 1  | 1  |
| 3 | 2  | 2  | 2  | 2  | 2  | 2  |
| 1 | 1  | 1  | 1  | 2  | 0  | 0  |
| 4 | 1  | 0  | 0  | 2  | 0  | 1  |
| 1 | 1  | 1  | 0  | 2  | 1  | 0  |
| 2 | 1  | 1  | 1  | 2  | 1  | 1  |
| 3 | 0  | 0  | 1  | 2  | 2  | 2  |
| 2 | 1  | 0  | 0  | 2  | 0  | 0  |

|   |   |    |    |   |   |    |   |
|---|---|----|----|---|---|----|---|
| 3 | 1 | 1  | 1  | 1 | 1 | 0  | 0 |
| 1 | 1 | 0  | 0  | 0 | 2 | 0  | 0 |
| 4 | 0 | 0  | 0  | 0 | 0 | 0  | 0 |
| 3 | 0 | 0  | 0  | 0 | 1 | 0  | 0 |
| 2 | 2 | 99 | 2  | 2 | 2 | 0  | 2 |
| 1 | 2 | 1  | 0  | 0 | 2 | 0  | 0 |
| 3 | 0 | 0  | 0  | 0 | 0 | 0  | 0 |
| 3 | 1 | 0  | 1  | 1 | 1 | 1  | 1 |
| 3 | 1 | 0  | 0  | 0 | 2 | 99 | 0 |
| 2 | 0 | 0  | 0  | 0 | 0 | 0  | 0 |
| 2 | 1 | 0  | 0  | 0 | 1 | 0  | 0 |
| 2 | 0 | 0  | 1  | 1 | 2 | 0  | 0 |
| 4 | 1 | 0  | 0  | 0 | 2 | 1  | 0 |
| 2 | 1 | 1  | 1  | 1 | 2 | 1  | 1 |
| 2 | 1 | 1  | 1  | 0 | 2 | 0  | 1 |
| 2 | 1 | 1  | 1  | 0 | 2 | 0  | 0 |
| 1 | 0 | 2  | 2  | 2 | 2 | 0  | 2 |
| 4 | 1 | 0  | 0  | 0 | 1 | 0  | 0 |
| 3 | 0 | 1  | 0  | 0 | 1 | 0  | 0 |
| 4 | 0 | 1  | 0  | 0 | 2 | 0  | 0 |
| 4 | 2 | 0  | 1  | 1 | 2 | 2  | 2 |
| 4 | 0 | 0  | 0  | 0 | 0 | 0  | 0 |
| 3 | 2 | 1  | 1  | 1 | 1 | 0  | 1 |
| 4 | 0 | 0  | 0  | 0 | 1 | 0  | 0 |
| 4 | 1 | 1  | 0  | 0 | 0 | 0  | 0 |
| 3 | 2 | 2  | 2  | 2 | 2 | 2  | 2 |
| 2 | 0 | 0  | 0  | 0 | 2 | 0  | 0 |
| 4 | 2 | 2  | 2  | 2 | 2 | 2  | 2 |
| 3 | 0 | 0  | 0  | 0 | 2 | 0  | 0 |
| 4 | 0 | 0  | 0  | 0 | 1 | 0  | 0 |
| 3 | 2 | 0  | 0  | 0 | 2 | 0  | 0 |
| 3 | 0 | 0  | 0  | 0 | 1 | 0  | 0 |
| 3 | 1 | 1  | 1  | 0 | 1 | 0  | 1 |
| 2 | 0 | 0  | 0  | 0 | 1 | 0  | 0 |
| 3 | 1 | 1  | 1  | 1 | 2 | 1  | 1 |
| 4 | 2 | 2  | 2  | 2 | 2 | 0  | 0 |
| 4 | 1 | 0  | 0  | 0 | 1 | 1  | 0 |
| 3 | 0 | 0  | 0  | 0 | 1 | 0  | 0 |
| 4 | 0 | 0  | 0  | 0 | 1 | 0  | 0 |
| 3 | 1 | 1  | 0  | 0 | 1 | 0  | 1 |
| 1 | 2 | 2  | 2  | 2 | 2 | 2  | 2 |
| 4 | 0 | 0  | 0  | 0 | 2 | 0  | 0 |
| 4 | 1 | 0  | 0  | 0 | 1 | 0  | 0 |
| 4 | 2 | 0  | 0  | 0 | 0 | 1  | 0 |
| 4 | 0 | 0  | 0  | 0 | 1 | 0  | 0 |
| 3 | 0 | 0  | 99 | 1 | 1 | 0  | 0 |
| 2 | 2 | 0  | 0  | 0 | 2 | 1  | 0 |
| 4 | 2 | 1  | 2  | 2 | 2 | 2  | 2 |

|    |    |    |    |    |    |    |
|----|----|----|----|----|----|----|
| 1  | 2  | 0  | 0  | 2  | 0  | 2  |
| 2  | 1  | 0  | 0  | 0  | 0  | 0  |
| 2  | 0  | 0  | 0  | 0  | 0  | 0  |
| 2  | 2  | 0  | 1  | 2  | 0  | 2  |
| 4  | 0  | 0  | 0  | 99 | 0  | 0  |
| 99 | 0  | 0  | 0  | 0  | 2  | 2  |
| 2  | 0  | 0  | 0  | 0  | 0  | 0  |
| 1  | 1  | 0  | 1  | 0  | 0  | 1  |
| 1  | 2  | 2  | 2  | 0  | 0  | 0  |
| 2  | 1  | 0  | 0  | 1  | 0  | 0  |
| 1  | 2  | 2  | 2  | 2  | 1  | 2  |
| 4  | 0  | 0  | 0  | 0  | 0  | 0  |
| 4  | 0  | 0  | 0  | 1  | 0  | 0  |
| 99 | 1  | 0  | 0  | 1  | 0  | 0  |
| 2  | 1  | 0  | 1  | 2  | 1  | 2  |
| 3  | 2  | 1  | 2  | 1  | 1  | 2  |
| 2  | 0  | 0  | 1  | 2  | 0  | 1  |
| 2  | 0  | 0  | 0  | 1  | 0  | 0  |
| 2  | 0  | 0  | 0  | 1  | 0  | 0  |
| 2  | 1  | 1  | 1  | 2  | 1  | 2  |
| 3  | 0  | 0  | 0  | 2  | 0  | 0  |
| 3  | 1  | 1  | 0  | 2  | 0  | 1  |
| 3  | 0  | 0  | 0  | 1  | 0  | 0  |
| 2  | 1  | 0  | 1  | 2  | 1  | 0  |
| 3  | 0  | 0  | 0  | 0  | 0  | 0  |
| 2  | 0  | 0  | 0  | 0  | 0  | 0  |
| 2  | 0  | 0  | 0  | 0  | 0  | 0  |
| 3  | 0  | 1  | 0  | 0  | 0  | 1  |
| 4  | 0  | 0  | 0  | 2  | 0  | 1  |
| 4  | 0  | 0  | 0  | 1  | 0  | 0  |
| 4  | 1  | 1  | 2  | 2  | 2  | 1  |
| 1  | 0  | 0  | 2  | 2  | 0  | 0  |
| 1  | 1  | 0  | 0  | 1  | 0  | 1  |
| 3  | 1  | 1  | 0  | 0  | 0  | 0  |
| 3  | 1  | 0  | 0  | 2  | 0  | 1  |
| 3  | 1  | 0  | 0  | 2  | 0  | 0  |
| 4  | 0  | 0  | 0  | 1  | 0  | 0  |
| 2  | 1  | 0  | 0  | 2  | 0  | 1  |
| 99 | 99 | 99 | 99 | 99 | 99 | 99 |
| 4  | 1  | 99 | 99 | 2  | 1  | 1  |
| 1  | 1  | 0  | 0  | 1  | 0  | 0  |
| 1  | 2  | 2  | 2  | 2  | 2  | 1  |
| 2  | 2  | 2  | 2  | 2  | 2  | 2  |
| 4  | 2  | 2  | 2  | 2  | 2  | 2  |
| 4  | 0  | 0  | 0  | 0  | 0  | 0  |
| 3  | 0  | 0  | 0  | 0  | 0  | 0  |
| 3  | 1  | 0  | 0  | 1  | 0  | 0  |
| 1  | 0  | 0  | 0  | 2  | 0  | 0  |

|    |   |   |   |    |   |   |
|----|---|---|---|----|---|---|
| 3  | 2 | 1 | 2 | 2  | 2 | 1 |
| 3  | 1 | 1 | 1 | 1  | 1 | 1 |
| 4  | 1 | 0 | 1 | 0  | 1 | 1 |
| 3  | 0 | 0 | 0 | 2  | 0 | 0 |
| 2  | 1 | 1 | 1 | 1  | 1 | 1 |
| 3  | 0 | 0 | 0 | 0  | 0 | 0 |
| 4  | 0 | 0 | 0 | 0  | 0 | 0 |
| 4  | 0 | 0 | 1 | 0  | 0 | 1 |
| 4  | 0 | 1 | 2 | 2  | 0 | 0 |
| 3  | 1 | 1 | 1 | 1  | 1 | 1 |
| 2  | 0 | 0 | 0 | 2  | 0 | 0 |
| 4  | 2 | 0 | 1 | 1  | 0 | 1 |
| 4  | 1 | 0 | 1 | 2  | 0 | 0 |
| 3  | 1 | 1 | 1 | 1  | 1 | 1 |
| 3  | 2 | 1 | 2 | 2  | 1 | 1 |
| 1  | 1 | 0 | 2 | 2  | 1 | 1 |
| 4  | 2 | 2 | 2 | 2  | 2 | 2 |
| 2  | 1 | 0 | 2 | 2  | 1 | 0 |
| 1  | 1 | 0 | 0 | 1  | 0 | 0 |
| 2  | 1 | 0 | 0 | 2  | 0 | 0 |
| 4  | 1 | 0 | 2 | 99 | 0 | 0 |
| 3  | 2 | 0 | 0 | 2  | 0 | 1 |
| 4  | 1 | 1 | 1 | 1  | 0 | 0 |
| 1  | 2 | 1 | 2 | 2  | 1 | 0 |
| 1  | 2 | 1 | 2 | 2  | 1 | 1 |
| 4  | 2 | 0 | 2 | 2  | 0 | 1 |
| 2  | 1 | 0 | 2 | 2  | 1 | 2 |
| 1  | 0 | 0 | 0 | 2  | 0 | 0 |
| 1  | 0 | 0 | 0 | 0  | 0 | 0 |
| 2  | 0 | 0 | 0 | 1  | 0 | 0 |
| 4  | 1 | 0 | 0 | 0  | 0 | 0 |
| 99 | 0 | 0 | 0 | 0  | 0 | 0 |
| 99 | 1 | 1 | 1 | 1  | 1 | 1 |
| 1  | 0 | 0 | 0 | 0  | 0 | 0 |
| 3  | 0 | 0 | 0 | 1  | 0 | 0 |
| 4  | 2 | 1 | 0 | 0  | 0 | 2 |
| 4  | 0 | 0 | 0 | 0  | 0 | 0 |
| 99 | 0 | 0 | 0 | 0  | 0 | 0 |
| 3  | 0 | 0 | 0 | 1  | 0 | 0 |
| 2  | 0 | 0 | 0 | 0  | 0 | 0 |
| 4  | 2 | 0 | 1 | 1  | 0 | 1 |
| 4  | 0 | 0 | 0 | 1  | 0 | 1 |
| 4  | 0 | 0 | 0 | 0  | 0 | 0 |
| 1  | 0 | 0 | 0 | 0  | 0 | 0 |
| 2  | 1 | 1 | 0 | 0  | 0 | 0 |
| 4  | 0 | 0 | 0 | 0  | 0 | 0 |
| 4  | 1 | 0 | 0 | 0  | 0 | 0 |
| 4  | 1 | 0 | 1 | 1  | 2 | 1 |

|    |   |   |   |   |   |   |
|----|---|---|---|---|---|---|
| 3  | 0 | 0 | 0 | 1 | 0 | 0 |
| 1  | 0 | 0 | 0 | 1 | 0 | 0 |
| 1  | 0 | 0 | 0 | 2 | 0 | 0 |
| 4  | 0 | 0 | 0 | 2 | 0 | 0 |
| 2  | 0 | 0 | 0 | 0 | 0 | 0 |
| 3  | 0 | 0 | 0 | 1 | 0 | 0 |
| 4  | 1 | 0 | 0 | 2 | 2 | 2 |
| 3  | 1 | 0 | 2 | 1 | 0 | 1 |
| 3  | 0 | 0 | 0 | 0 | 0 | 0 |
| 4  | 0 | 1 | 0 | 2 | 0 | 1 |
| 4  | 1 | 0 | 0 | 2 | 0 | 0 |
| 4  | 1 | 0 | 0 | 1 | 0 | 0 |
| 2  | 0 | 0 | 0 | 0 | 0 | 0 |
| 4  | 0 | 0 | 0 | 0 | 0 | 0 |
| 2  | 0 | 1 | 0 | 2 | 0 | 0 |
| 3  | 1 | 0 | 0 | 1 | 1 | 1 |
| 4  | 1 | 1 | 0 | 2 | 0 | 0 |
| 4  | 2 | 1 | 1 | 1 | 0 | 2 |
| 3  | 1 | 1 | 1 | 2 | 1 | 1 |
| 1  | 0 | 0 | 0 | 2 | 0 | 0 |
| 2  | 0 | 0 | 0 | 0 | 0 | 0 |
| 3  | 1 | 0 | 1 | 2 | 1 | 1 |
| 4  | 1 | 0 | 0 | 1 | 0 | 0 |
| 3  | 0 | 0 | 0 | 1 | 0 | 0 |
| 2  | 0 | 0 | 0 | 0 | 0 | 0 |
| 4  | 2 | 1 | 2 | 1 | 0 | 2 |
| 4  | 0 | 0 | 0 | 0 | 0 | 0 |
| 4  | 0 | 0 | 0 | 0 | 0 | 0 |
| 3  | 0 | 1 | 1 | 1 | 0 | 1 |
| 99 | 0 | 0 | 0 | 1 | 0 | 0 |
| 4  | 0 | 0 | 0 | 0 | 0 | 0 |
| 2  | 1 | 1 | 1 | 1 | 1 | 1 |
| 2  | 1 | 0 | 1 | 1 | 0 | 1 |
| 2  | 1 | 0 | 1 | 2 | 0 | 1 |
| 4  | 0 | 0 | 0 | 1 | 0 | 2 |
| 4  | 0 | 0 | 0 | 0 | 0 | 0 |
| 1  | 0 | 0 | 0 | 0 | 0 | 0 |
| 1  | 2 | 1 | 2 | 1 | 1 | 2 |
| 4  | 0 | 0 | 0 | 0 | 0 | 0 |
| 4  | 0 | 0 | 0 | 0 | 0 | 0 |
| 4  | 0 | 0 | 0 | 2 | 0 | 0 |
| 3  | 1 | 0 | 1 | 1 | 0 | 2 |
| 2  | 2 | 1 | 2 | 2 | 1 | 2 |
| 4  | 1 | 1 | 1 | 2 | 0 | 1 |
| 2  | 1 | 0 | 0 | 2 | 0 | 0 |
| 3  | 1 | 0 | 0 | 2 | 1 | 0 |
| 3  | 0 | 0 | 0 | 0 | 0 | 1 |
| 2  | 1 | 1 | 1 | 1 | 1 | 2 |

|   |    |   |   |   |   |   |
|---|----|---|---|---|---|---|
| 4 | 0  | 0 | 0 | 1 | 0 | 0 |
| 4 | 0  | 0 | 0 | 0 | 0 | 0 |
| 3 | 0  | 0 | 0 | 1 | 0 | 0 |
| 4 | 1  | 0 | 0 | 0 | 0 | 0 |
| 3 | 1  | 0 | 0 | 1 | 0 | 1 |
| 2 | 1  | 0 | 1 | 2 | 0 | 0 |
| 4 | 1  | 0 | 0 | 2 | 1 | 0 |
| 3 | 0  | 0 | 0 | 0 | 0 | 0 |
| 2 | 1  | 1 | 1 | 1 | 1 | 1 |
| 3 | 0  | 0 | 0 | 0 | 0 | 0 |
| 4 | 1  | 0 | 1 | 1 | 1 | 2 |
| 3 | 2  | 1 | 2 | 2 | 1 | 1 |
| 3 | 0  | 0 | 0 | 0 | 0 | 0 |
| 2 | 1  | 1 | 0 | 1 | 0 | 1 |
| 2 | 0  | 0 | 0 | 1 | 0 | 0 |
| 3 | 1  | 0 | 1 | 0 | 0 | 0 |
| 4 | 1  | 1 | 1 | 1 | 1 | 1 |
| 3 | 1  | 0 | 0 | 2 | 0 | 0 |
| 2 | 1  | 0 | 0 | 1 | 0 | 0 |
| 2 | 0  | 0 | 0 | 1 | 0 | 0 |
| 2 | 0  | 0 | 0 | 1 | 0 | 0 |
| 4 | 0  | 0 | 0 | 0 | 0 | 0 |
| 4 | 0  | 0 | 0 | 0 | 0 | 0 |
| 2 | 2  | 1 | 1 | 1 | 1 | 1 |
| 1 | 0  | 0 | 0 | 0 | 0 | 0 |
| 3 | 0  | 0 | 0 | 1 | 0 | 0 |
| 3 | 0  | 0 | 1 | 0 | 0 | 0 |
| 4 | 0  | 0 | 0 | 1 | 0 | 0 |
| 3 | 0  | 0 | 0 | 1 | 0 | 0 |
| 3 | 1  | 1 | 1 | 1 | 0 | 0 |
| 4 | 2  | 0 | 0 | 2 | 0 | 1 |
| 3 | 0  | 0 | 0 | 0 | 0 | 0 |
| 3 | 1  | 0 | 0 | 1 | 1 | 1 |
| 2 | 1  | 0 | 1 | 1 | 1 | 1 |
| 2 | 2  | 2 | 2 | 2 | 2 | 2 |
| 2 | 99 | 2 | 1 | 2 | 1 | 0 |
| 4 | 1  | 0 | 1 | 1 | 0 | 1 |
| 3 | 1  | 0 | 0 | 1 | 0 | 0 |
| 4 | 1  | 0 | 0 | 1 | 0 | 0 |
| 2 | 1  | 0 | 1 | 1 | 0 | 1 |
| 3 | 1  | 0 | 1 | 2 | 0 | 1 |
| 3 | 0  | 0 | 0 | 1 | 0 | 0 |
| 2 | 2  | 0 | 2 | 2 | 0 | 2 |
| 3 | 0  | 0 | 0 | 0 | 0 | 0 |
| 1 | 0  | 0 | 0 | 0 | 0 | 0 |
| 4 | 1  | 1 | 1 | 1 | 1 | 1 |
| 2 | 1  | 1 | 0 | 0 | 1 | 0 |
| 3 | 0  | 0 | 0 | 1 | 0 | 0 |

|    |   |   |   |   |   |   |   |
|----|---|---|---|---|---|---|---|
| 2  | 0 | 0 | 0 | 0 | 0 | 0 | 0 |
| 1  | 0 | 0 | 0 | 0 | 0 | 0 | 0 |
| 3  | 0 | 0 | 0 | 0 | 0 | 0 | 0 |
| 2  | 0 | 0 | 0 | 0 | 1 | 0 | 0 |
| 4  | 0 | 0 | 0 | 0 | 1 | 0 | 0 |
| 3  | 0 | 0 | 0 | 0 | 1 | 0 | 0 |
| 99 | 0 | 0 | 0 | 0 | 0 | 0 | 0 |
| 99 | 1 | 0 | 0 | 0 | 1 | 1 | 0 |
| 4  | 1 | 0 | 0 | 0 | 1 | 0 | 1 |
| 99 | 0 | 0 | 0 | 0 | 1 | 0 | 0 |
| 4  | 0 | 0 | 0 | 0 | 0 | 0 | 0 |
| 4  | 0 | 0 | 0 | 0 | 0 | 0 | 0 |
| 2  | 0 | 0 | 0 | 0 | 0 | 0 | 0 |
| 4  | 1 | 1 | 2 | 2 | 1 | 1 | 2 |
| 4  | 1 | 0 | 1 | 1 | 0 | 0 | 1 |
| 4  | 0 | 0 | 0 | 0 | 0 | 0 | 0 |
| 3  | 1 | 1 | 1 | 1 | 1 | 1 | 1 |
| 3  | 0 | 0 | 0 | 0 | 1 | 1 | 0 |
| 1  | 2 | 1 | 1 | 2 | 1 | 1 | 1 |
| 4  | 0 | 0 | 0 | 0 | 0 | 0 | 0 |
| 4  | 0 | 0 | 0 | 0 | 1 | 0 | 0 |
| 99 | 0 | 0 | 0 | 0 | 0 | 0 | 0 |
| 3  | 0 | 0 | 0 | 0 | 1 | 0 | 0 |
| 3  | 0 | 1 | 0 | 0 | 1 | 1 | 1 |
| 4  | 1 | 0 | 0 | 0 | 2 | 0 | 0 |
| 3  | 0 | 0 | 0 | 0 | 1 | 0 | 0 |
| 3  | 1 | 0 | 0 | 0 | 1 | 0 | 0 |
| 3  | 0 | 0 | 0 | 0 | 0 | 0 | 0 |
| 4  | 0 | 0 | 0 | 0 | 0 | 0 | 0 |
| 3  | 1 | 0 | 0 | 0 | 1 | 1 | 0 |
| 2  | 0 | 0 | 0 | 0 | 1 | 0 | 0 |
| 2  | 0 | 0 | 0 | 0 | 0 | 0 | 0 |
| 4  | 0 | 0 | 0 | 0 | 1 | 0 | 0 |
| 3  | 1 | 0 | 1 | 0 | 0 | 0 | 0 |
| 4  | 0 | 0 | 0 | 0 | 0 | 0 | 0 |
| 4  | 0 | 0 | 0 | 0 | 1 | 0 | 0 |
| 4  | 0 | 0 | 0 | 0 | 0 | 0 | 0 |
| 3  | 1 | 0 | 2 | 2 | 0 | 0 | 0 |
| 3  | 1 | 0 | 1 | 2 | 0 | 0 | 1 |
| 1  | 0 | 0 | 0 | 2 | 0 | 0 | 0 |
| 1  | 0 | 0 | 0 | 1 | 2 | 0 | 0 |
| 2  | 2 | 1 | 1 | 2 | 0 | 0 | 1 |
| 3  | 1 | 0 | 0 | 2 | 0 | 0 | 0 |
| 3  | 1 | 1 | 2 | 2 | 1 | 0 | 1 |
| 4  | 1 | 0 | 0 | 1 | 0 | 0 | 0 |
| 4  | 0 | 0 | 0 | 1 | 0 | 0 | 0 |
| 3  | 0 | 0 | 0 | 0 | 0 | 0 | 0 |
| 4  | 1 | 0 | 1 | 2 | 1 | 0 | 0 |



|    |    |    |    |    |    |    |    |
|----|----|----|----|----|----|----|----|
| 2  | 1  | 1  | 1  | 1  | 1  | 1  | 0  |
| 4  | 1  | 1  | 1  | 1  | 1  | 1  | 1  |
| 3  | 1  | 1  | 0  | 0  | 2  | 0  | 1  |
| 3  | 1  | 0  | 0  | 0  | 1  | 1  | 1  |
| 99 | 0  | 0  | 0  | 0  | 0  | 0  | 0  |
| 4  | 1  | 1  | 1  | 1  | 1  | 0  | 0  |
| 3  | 1  | 0  | 1  | 2  | 0  | 0  | 0  |
| 4  | 0  | 0  | 0  | 0  | 0  | 0  | 0  |
| 2  | 0  | 0  | 0  | 0  | 1  | 0  | 0  |
| 2  | 1  | 1  | 1  | 1  | 1  | 1  | 1  |
| 3  | 2  | 0  | 0  | 0  | 2  | 0  | 0  |
| 4  | 0  | 0  | 0  | 0  | 0  | 0  | 0  |
| 2  | 1  | 0  | 0  | 0  | 2  | 0  | 0  |
| 4  | 1  | 0  | 0  | 0  | 1  | 0  | 0  |
| 3  | 0  | 0  | 0  | 0  | 0  | 0  | 0  |
| 2  | 2  | 2  | 2  | 2  | 2  | 2  | 2  |
| 4  | 1  | 1  | 1  | 1  | 1  | 0  | 0  |
| 3  | 2  | 1  | 1  | 1  | 1  | 0  | 0  |
| 2  | 1  | 0  | 0  | 0  | 2  | 0  | 1  |
| 3  | 1  | 0  | 1  | 1  | 1  | 0  | 1  |
| 4  | 1  | 0  | 0  | 0  | 2  | 1  | 2  |
| 3  | 1  | 1  | 1  | 1  | 1  | 0  | 1  |
| 4  | 1  | 0  | 0  | 0  | 0  | 1  | 0  |
| 4  | 1  | 1  | 1  | 1  | 0  | 0  | 0  |
| 4  | 1  | 0  | 0  | 0  | 2  | 0  | 0  |
| 99 | 99 | 99 | 99 | 99 | 99 | 99 | 99 |
| 1  | 2  | 2  | 2  | 2  | 2  | 2  | 1  |
| 4  | 0  | 0  | 0  | 0  | 1  | 0  | 0  |
| 3  | 1  | 0  | 2  | 2  | 2  | 1  | 1  |
| 2  | 0  | 0  | 1  | 1  | 1  | 0  | 0  |
| 2  | 2  | 1  | 2  | 2  | 2  | 0  | 1  |
| 1  | 0  | 0  | 1  | 1  | 1  | 0  | 0  |
| 3  | 0  | 0  | 0  | 0  | 0  | 0  | 0  |
| 2  | 1  | 0  | 0  | 0  | 2  | 1  | 0  |
| 2  | 2  | 2  | 2  | 2  | 2  | 2  | 2  |
| 2  | 0  | 1  | 1  | 0  | 0  | 0  | 0  |
| 2  | 1  | 0  | 0  | 0  | 1  | 1  | 1  |
| 2  | 2  | 0  | 2  | 2  | 2  | 0  | 2  |
| 2  | 0  | 0  | 0  | 0  | 0  | 0  | 0  |
| 4  | 2  | 0  | 2  | 2  | 2  | 0  | 1  |
| 3  | 1  | 0  | 0  | 0  | 2  | 0  | 0  |
| 2  | 1  | 1  | 2  | 2  | 1  | 1  | 1  |
| 2  | 1  | 0  | 1  | 1  | 1  | 0  | 0  |
| 4  | 2  | 2  | 2  | 2  | 2  | 2  | 2  |
| 4  | 0  | 0  | 0  | 0  | 1  | 0  | 0  |
| 2  | 1  | 1  | 1  | 1  | 1  | 1  | 1  |
| 2  | 2  | 1  | 1  | 1  | 0  | 0  | 0  |
| 99 | 1  | 0  | 1  | 1  | 1  | 0  | 0  |

|    |   |   |   |   |   |   |   |
|----|---|---|---|---|---|---|---|
| 3  | 0 | 0 | 0 | 0 | 0 | 0 | 0 |
| 2  | 1 | 1 | 1 | 1 | 1 | 1 | 0 |
| 1  | 1 | 0 | 0 | 0 | 2 | 0 | 0 |
| 3  | 1 | 0 | 0 | 0 | 1 | 1 | 1 |
| 2  | 1 | 0 | 0 | 0 | 2 | 1 | 2 |
| 1  | 0 | 0 | 0 | 0 | 2 | 0 | 0 |
| 2  | 2 | 1 | 2 | 2 | 2 | 1 | 2 |
| 3  | 0 | 0 | 0 | 0 | 0 | 0 | 0 |
| 2  | 1 | 1 | 1 | 1 | 2 | 1 | 1 |
| 2  | 1 | 1 | 0 | 0 | 1 | 0 | 1 |
| 3  | 0 | 0 | 0 | 0 | 1 | 0 | 0 |
| 2  | 1 | 0 | 1 | 1 | 2 | 0 | 0 |
| 2  | 0 | 0 | 0 | 0 | 0 | 0 | 0 |
| 4  | 1 | 1 | 0 | 0 | 2 | 1 | 1 |
| 4  | 2 | 1 | 1 | 1 | 2 | 1 | 1 |
| 3  | 1 | 0 | 1 | 1 | 1 | 0 | 0 |
| 2  | 0 | 0 | 0 | 0 | 0 | 0 | 0 |
| 4  | 0 | 0 | 0 | 0 | 1 | 0 | 0 |
| 4  | 1 | 0 | 2 | 0 | 0 | 0 | 0 |
| 3  | 1 | 1 | 1 | 1 | 2 | 1 | 0 |
| 1  | 0 | 0 | 0 | 0 | 1 | 0 | 0 |
| 3  | 0 | 0 | 0 | 0 | 1 | 0 | 0 |
| 3  | 1 | 0 | 0 | 0 | 1 | 0 | 0 |
| 3  | 2 | 0 | 1 | 2 | 2 | 0 | 2 |
| 3  | 0 | 0 | 0 | 0 | 1 | 0 | 0 |
| 2  | 1 | 0 | 1 | 1 | 2 | 1 | 1 |
| 4  | 2 | 1 | 1 | 0 | 0 | 0 | 1 |
| 2  | 1 | 0 | 0 | 0 | 1 | 0 | 0 |
| 2  | 0 | 0 | 0 | 0 | 0 | 0 | 0 |
| 2  | 0 | 0 | 0 | 0 | 0 | 0 | 0 |
| 3  | 1 | 0 | 0 | 0 | 2 | 0 | 0 |
| 4  | 1 | 0 | 0 | 0 | 0 | 0 | 0 |
| 3  | 1 | 0 | 0 | 0 | 1 | 0 | 0 |
| 4  | 0 | 0 | 0 | 0 | 1 | 0 | 0 |
| 2  | 2 | 1 | 2 | 2 | 2 | 1 | 2 |
| 4  | 1 | 0 | 0 | 0 | 2 | 1 | 1 |
| 4  | 0 | 0 | 0 | 0 | 2 | 0 | 0 |
| 4  | 0 | 0 | 0 | 0 | 0 | 0 | 0 |
| 4  | 1 | 1 | 1 | 1 | 1 | 1 | 2 |
| 3  | 1 | 0 | 0 | 0 | 2 | 0 | 0 |
| 3  | 1 | 1 | 1 | 1 | 1 | 1 | 1 |
| 4  | 1 | 0 | 0 | 0 | 0 | 0 | 0 |
| 4  | 1 | 0 | 1 | 2 | 2 | 0 | 0 |
| 2  | 1 | 0 | 0 | 0 | 2 | 0 | 0 |
| 3  | 0 | 0 | 0 | 0 | 0 | 0 | 0 |
| 99 | 0 | 0 | 0 | 0 | 0 | 0 | 0 |
| 4  | 0 | 0 | 0 | 0 | 1 | 0 | 0 |
| 3  | 0 | 0 | 2 | 2 | 0 | 0 | 0 |

|    |    |    |    |    |    |    |
|----|----|----|----|----|----|----|
| 4  | 1  | 0  | 0  | 1  | 0  | 0  |
| 4  | 0  | 0  | 0  | 1  | 1  | 0  |
| 4  | 0  | 0  | 0  | 1  | 2  | 2  |
| 99 | 99 | 99 | 99 | 99 | 99 | 99 |
| 3  | 2  | 2  | 2  | 2  | 1  | 1  |
| 4  | 0  | 0  | 0  | 0  | 0  | 0  |
| 2  | 0  | 0  | 0  | 1  | 0  | 0  |
| 3  | 1  | 0  | 0  | 1  | 0  | 1  |
| 3  | 0  | 0  | 0  | 1  | 0  | 0  |
| 3  | 0  | 0  | 0  | 1  | 0  | 0  |
| 99 | 0  | 0  | 0  | 0  | 0  | 0  |
| 2  | 1  | 0  | 1  | 2  | 0  | 0  |
| 99 | 2  | 1  | 1  | 2  | 0  | 2  |
| 4  | 0  | 0  | 0  | 1  | 0  | 0  |
| 2  | 0  | 0  | 0  | 2  | 0  | 1  |
| 4  | 1  | 1  | 2  | 1  | 0  | 0  |
| 3  | 1  | 0  | 0  | 2  | 1  | 1  |
| 2  | 0  | 0  | 0  | 2  | 0  | 0  |
| 3  | 2  | 0  | 1  | 2  | 1  | 2  |
| 2  | 1  | 0  | 1  | 2  | 0  | 1  |
| 2  | 2  | 1  | 1  | 1  | 1  | 0  |
| 3  | 0  | 0  | 0  | 1  | 0  | 0  |
| 99 | 1  | 0  | 0  | 1  | 0  | 0  |
| 2  | 2  | 2  | 0  | 2  | 0  | 0  |
| 2  | 1  | 1  | 1  | 1  | 0  | 0  |
| 4  | 2  | 1  | 0  | 2  | 0  | 1  |
| 3  | 2  | 0  | 2  | 2  | 1  | 1  |
| 4  | 1  | 0  | 1  | 0  | 0  | 0  |
| 3  | 2  | 1  | 2  | 0  | 1  | 0  |
| 4  | 2  | 2  | 99 | 2  | 0  | 0  |
| 3  | 0  | 0  | 0  | 1  | 0  | 0  |
| 2  | 2  | 1  | 1  | 2  | 0  | 1  |
| 1  | 1  | 0  | 0  | 1  | 0  | 0  |
| 3  | 0  | 0  | 0  | 0  | 0  | 0  |
| 4  | 2  | 2  | 0  | 2  | 2  | 2  |
| 2  | 1  | 0  | 1  | 2  | 1  | 0  |
| 4  | 1  | 1  | 0  | 0  | 0  | 0  |
| 3  | 0  | 0  | 2  | 0  | 0  | 0  |
| 1  | 1  | 0  | 0  | 1  | 0  | 0  |
| 2  | 0  | 0  | 0  | 2  | 0  | 0  |
| 4  | 0  | 0  | 0  | 0  | 0  | 0  |
| 4  | 0  | 0  | 0  | 1  | 0  | 0  |
| 4  | 0  | 0  | 0  | 2  | 0  | 0  |
| 1  | 0  | 0  | 0  | 0  | 0  | 0  |
| 3  | 1  | 0  | 0  | 1  | 0  | 0  |
| 3  | 2  | 0  | 1  | 2  | 0  | 1  |
| 3  | 1  | 1  | 2  | 2  | 1  | 1  |
| 2  | 1  | 0  | 0  | 2  | 0  | 1  |

|    |    |    |    |    |    |    |    |
|----|----|----|----|----|----|----|----|
| 99 | 0  | 0  | 0  | 0  | 0  | 0  | 0  |
| 4  | 0  | 0  | 0  | 0  | 2  | 0  | 0  |
| 3  | 1  | 0  | 2  | 1  | 1  | 1  | 1  |
| 2  | 1  | 1  | 1  | 1  | 1  | 0  | 1  |
| 3  | 1  | 0  | 0  | 0  | 1  | 0  | 0  |
| 3  | 0  | 0  | 0  | 0  | 0  | 0  | 0  |
| 4  | 2  | 1  | 1  | 1  | 1  | 0  | 0  |
| 4  | 1  | 1  | 0  | 0  | 1  | 0  | 0  |
| 2  | 0  | 0  | 0  | 0  | 1  | 0  | 0  |
| 1  | 1  | 0  | 0  | 0  | 1  | 0  | 0  |
| 99 | 1  | 1  | 1  | 1  | 2  | 0  | 0  |
| 99 | 2  | 2  | 2  | 2  | 2  | 2  | 2  |
| 2  | 1  | 0  | 0  | 0  | 2  | 0  | 2  |
| 2  | 1  | 1  | 2  | 2  | 2  | 1  | 2  |
| 4  | 0  | 0  | 2  | 2  | 99 | 0  | 2  |
| 4  | 1  | 1  | 1  | 1  | 1  | 0  | 0  |
| 99 | 99 | 99 | 99 | 99 | 99 | 99 | 99 |
| 4  | 0  | 0  | 0  | 0  | 0  | 0  | 0  |
| 3  | 1  | 0  | 0  | 0  | 1  | 0  | 0  |
| 2  | 2  | 2  | 1  | 1  | 1  | 0  | 0  |
| 3  | 2  | 1  | 2  | 2  | 2  | 1  | 1  |
| 4  | 0  | 0  | 0  | 0  | 1  | 0  | 0  |
| 4  | 2  | 1  | 1  | 1  | 2  | 2  | 1  |
| 3  | 1  | 0  | 1  | 1  | 1  | 0  | 1  |
| 2  | 2  | 1  | 2  | 1  | 1  | 0  | 0  |
| 2  | 0  | 0  | 0  | 0  | 0  | 0  | 0  |
| 99 | 1  | 99 | 99 | 99 | 1  | 99 | 99 |
| 2  | 0  | 0  | 0  | 0  | 1  | 0  | 0  |
| 3  | 1  | 0  | 1  | 1  | 1  | 1  | 0  |
| 2  | 0  | 0  | 0  | 0  | 0  | 0  | 0  |
| 3  | 1  | 0  | 1  | 1  | 1  | 1  | 0  |
| 4  | 0  | 99 | 99 | 1  | 1  | 0  | 0  |
| 3  | 1  | 0  | 0  | 0  | 1  | 0  | 0  |
| 4  | 1  | 1  | 1  | 1  | 2  | 0  | 0  |
| 4  | 0  | 0  | 0  | 0  | 1  | 0  | 0  |
| 3  | 1  | 1  | 0  | 0  | 2  | 2  | 1  |
| 3  | 0  | 0  | 0  | 0  | 1  | 0  | 1  |
| 4  | 1  | 1  | 0  | 0  | 1  | 1  | 0  |
| 4  | 0  | 1  | 0  | 0  | 0  | 0  | 0  |
| 3  | 0  | 0  | 0  | 0  | 0  | 0  | 0  |
| 3  | 1  | 0  | 1  | 1  | 1  | 1  | 1  |
| 4  | 0  | 0  | 0  | 0  | 0  | 0  | 0  |
| 99 | 0  | 0  | 0  | 0  | 99 | 0  | 0  |
| 3  | 0  | 0  | 0  | 0  | 0  | 0  | 0  |
| 2  | 0  | 0  | 0  | 0  | 0  | 0  | 0  |
| 4  | 0  | 0  | 0  | 0  | 1  | 99 | 1  |
| 4  | 0  | 1  | 0  | 0  | 0  | 0  | 1  |
| 4  | 0  | 0  | 0  | 0  | 1  | 0  | 1  |

|    |    |    |    |    |    |    |
|----|----|----|----|----|----|----|
| 4  | 0  | 0  | 0  | 2  | 0  | 0  |
| 3  | 1  | 0  | 1  | 2  | 0  | 1  |
| 3  | 0  | 0  | 0  | 0  | 0  | 0  |
| 4  | 0  | 0  | 0  | 1  | 0  | 0  |
| 2  | 1  | 0  | 1  | 2  | 0  | 1  |
| 3  | 0  | 0  | 0  | 1  | 0  | 0  |
| 3  | 0  | 0  | 0  | 0  | 0  | 1  |
| 1  | 0  | 0  | 0  | 1  | 0  | 0  |
| 4  | 0  | 0  | 0  | 0  | 0  | 0  |
| 1  | 1  | 0  | 0  | 2  | 0  | 0  |
| 2  | 1  | 1  | 1  | 2  | 2  | 1  |
| 99 | 1  | 1  | 1  | 2  | 2  | 1  |
| 1  | 0  | 0  | 0  | 2  | 0  | 0  |
| 3  | 0  | 0  | 0  | 1  | 0  | 0  |
| 1  | 1  | 0  | 1  | 2  | 0  | 0  |
| 3  | 2  | 2  | 0  | 2  | 0  | 0  |
| 2  | 0  | 1  | 0  | 0  | 0  | 0  |
| 1  | 1  | 0  | 1  | 1  | 1  | 0  |
| 3  | 0  | 0  | 0  | 0  | 0  | 0  |
| 4  | 0  | 0  | 0  | 0  | 0  | 0  |
| 4  | 0  | 0  | 0  | 0  | 0  | 0  |
| 4  | 0  | 0  | 0  | 0  | 0  | 0  |
| 99 | 99 | 99 | 99 | 99 | 99 | 99 |
| 3  | 99 | 0  | 0  | 0  | 0  | 0  |
| 3  | 1  | 0  | 1  | 0  | 0  | 0  |
| 4  | 1  | 1  | 2  | 2  | 0  | 1  |
| 2  | 1  | 1  | 1  | 2  | 1  | 0  |
| 1  | 0  | 0  | 0  | 0  | 0  | 0  |
| 3  | 1  | 1  | 0  | 1  | 0  | 1  |
| 3  | 2  | 1  | 99 | 1  | 1  | 99 |
| 99 | 99 | 99 | 99 | 99 | 99 | 99 |
| 99 | 0  | 0  | 2  | 0  | 0  | 0  |
| 3  | 2  | 0  | 1  | 1  | 1  | 1  |
| 3  | 0  | 0  | 0  | 2  | 0  | 0  |
| 2  | 2  | 1  | 2  | 2  | 2  | 2  |
| 3  | 0  | 0  | 0  | 2  | 0  | 0  |
| 4  | 1  | 0  | 0  | 2  | 0  | 0  |
| 2  | 0  | 0  | 0  | 0  | 0  | 0  |
| 3  | 2  | 1  | 1  | 2  | 2  | 1  |
| 3  | 0  | 1  | 0  | 1  | 0  | 0  |
| 1  | 0  | 0  | 0  | 1  | 0  | 0  |
| 3  | 0  | 0  | 0  | 0  | 0  | 0  |
| 2  | 1  | 1  | 1  | 2  | 0  | 2  |
| 99 | 1  | 1  | 0  | 0  | 0  | 0  |
| 4  | 0  | 0  | 0  | 0  | 0  | 0  |
| 1  | 1  | 0  | 0  | 1  | 1  | 1  |
| 3  | 2  | 2  | 2  | 2  | 2  | 1  |

|    |   |   |    |   |    |   |
|----|---|---|----|---|----|---|
| 4  | 1 | 0 | 0  | 1 | 0  | 0 |
| 4  | 1 | 1 | 1  | 1 | 1  | 1 |
| 4  | 1 | 0 | 1  | 1 | 1  | 1 |
| 3  | 1 | 1 | 1  | 1 | 1  | 0 |
| 3  | 2 | 1 | 2  | 2 | 2  | 1 |
| 2  | 1 | 0 | 0  | 2 | 0  | 0 |
| 4  | 0 | 0 | 0  | 0 | 0  | 0 |
| 4  | 0 | 0 | 0  | 0 | 0  | 0 |
| 2  | 0 | 0 | 1  | 2 | 99 | 0 |
| 2  | 0 | 0 | 0  | 1 | 0  | 0 |
| 2  | 1 | 1 | 0  | 1 | 0  | 0 |
| 2  | 0 | 0 | 0  | 0 | 0  | 0 |
| 1  | 1 | 0 | 0  | 0 | 0  | 0 |
| 99 | 1 | 1 | 1  | 2 | 0  | 0 |
| 2  | 1 | 1 | 1  | 2 | 1  | 2 |
| 4  | 1 | 0 | 0  | 1 | 1  | 1 |
| 1  | 1 | 1 | 1  | 1 | 1  | 1 |
| 3  | 2 | 2 | 0  | 2 | 1  | 0 |
| 1  | 2 | 1 | 2  | 2 | 0  | 0 |
| 3  | 2 | 1 | 2  | 1 | 1  | 0 |
| 3  | 0 | 0 | 0  | 0 | 0  | 0 |
| 4  | 1 | 0 | 1  | 2 | 0  | 0 |
| 4  | 0 | 0 | 0  | 2 | 0  | 0 |
| 4  | 1 | 1 | 0  | 2 | 1  | 1 |
| 1  | 1 | 0 | 0  | 1 | 0  | 1 |
| 2  | 0 | 0 | 0  | 1 | 0  | 0 |
| 3  | 1 | 0 | 0  | 1 | 0  | 0 |
| 3  | 0 | 0 | 0  | 1 | 0  | 0 |
| 3  | 1 | 0 | 99 | 1 | 0  | 1 |
| 2  | 1 | 0 | 0  | 2 | 0  | 0 |
| 1  | 2 | 0 | 1  | 2 | 1  | 1 |
| 4  | 1 | 1 | 0  | 0 | 0  | 0 |
| 3  | 0 | 0 | 0  | 1 | 0  | 0 |
| 1  | 2 | 0 | 1  | 2 | 0  | 1 |
| 4  | 0 | 0 | 1  | 1 | 0  | 0 |
| 2  | 0 | 0 | 0  | 0 | 0  | 0 |
| 3  | 0 | 0 | 0  | 0 | 0  | 0 |
| 4  | 1 | 1 | 0  | 1 | 0  | 1 |
| 3  | 0 | 0 | 0  | 0 | 0  | 0 |
| 2  | 0 | 0 | 1  | 0 | 0  | 0 |
| 2  | 1 | 1 | 2  | 2 | 0  | 1 |
| 3  | 1 | 0 | 0  | 0 | 0  | 0 |
| 3  | 1 | 0 | 2  | 2 | 0  | 0 |
| 3  | 0 | 0 | 0  | 0 | 0  | 0 |
| 3  | 0 | 0 | 0  | 0 | 0  | 0 |
| 4  | 1 | 0 | 0  | 1 | 0  | 1 |
| 3  | 0 | 0 | 0  | 0 | 0  | 0 |
| 3  | 0 | 0 | 0  | 0 | 0  | 0 |

|    |    |    |    |    |    |    |
|----|----|----|----|----|----|----|
| 3  | 1  | 0  | 99 | 99 | 1  | 1  |
| 4  | 1  | 0  | 0  | 2  | 0  | 0  |
| 1  | 2  | 1  | 0  | 2  | 1  | 1  |
| 3  | 2  | 2  | 0  | 2  | 2  | 2  |
| 3  | 1  | 0  | 1  | 1  | 0  | 0  |
| 2  | 0  | 0  | 0  | 1  | 0  | 0  |
| 4  | 0  | 0  | 0  | 0  | 99 | 0  |
| 1  | 2  | 1  | 1  | 2  | 1  | 0  |
| 4  | 0  | 0  | 0  | 0  | 0  | 0  |
| 3  | 0  | 0  | 0  | 1  | 0  | 0  |
| 3  | 0  | 0  | 0  | 99 | 0  | 1  |
| 4  | 1  | 0  | 0  | 1  | 0  | 0  |
| 4  | 2  | 2  | 2  | 2  | 2  | 2  |
| 4  | 0  | 0  | 0  | 0  | 0  | 0  |
| 99 | 99 | 99 | 0  | 99 | 99 | 99 |
| 2  | 0  | 0  | 0  | 1  | 0  | 0  |
| 4  | 0  | 0  | 2  | 2  | 0  | 1  |
| 4  | 0  | 0  | 0  | 1  | 0  | 0  |
| 4  | 0  | 99 | 0  | 0  | 0  | 0  |
| 99 | 99 | 99 | 99 | 99 | 99 | 99 |
| 2  | 1  | 0  | 0  | 0  | 0  | 1  |
| 4  | 1  | 0  | 0  | 2  | 0  | 0  |
| 2  | 0  | 0  | 0  | 1  | 0  | 0  |
| 3  | 2  | 2  | 2  | 2  | 2  | 2  |
| 1  | 0  | 0  | 0  | 1  | 0  | 0  |
| 3  | 0  | 0  | 0  | 0  | 0  | 0  |
| 2  | 2  | 0  | 1  | 2  | 1  | 0  |
| 2  | 1  | 0  | 0  | 2  | 0  | 0  |
| 3  | 1  | 0  | 0  | 1  | 0  | 0  |
| 3  | 1  | 0  | 0  | 1  | 0  | 0  |
| 2  | 2  | 1  | 1  | 2  | 1  | 1  |
| 1  | 0  | 0  | 0  | 2  | 0  | 0  |
| 4  | 2  | 0  | 2  | 2  | 0  | 2  |
| 2  | 1  | 1  | 0  | 2  | 1  | 1  |
| 1  | 2  | 2  | 2  | 2  | 2  | 2  |
| 1  | 0  | 0  | 1  | 2  | 0  | 0  |
| 2  | 1  | 1  | 1  | 1  | 1  | 0  |
| 2  | 1  | 0  | 0  | 2  | 1  | 1  |
| 3  | 2  | 0  | 1  | 2  | 0  | 2  |
| 3  | 2  | 0  | 0  | 1  | 0  | 0  |
| 4  | 0  | 0  | 0  | 2  | 0  | 0  |
| 4  | 0  | 99 | 0  | 1  | 0  | 99 |
| 2  | 0  | 0  | 0  | 1  | 1  | 0  |
| 2  | 1  | 0  | 2  | 1  | 1  | 2  |
| 2  | 2  | 0  | 0  | 0  | 1  | 2  |
| 2  | 1  | 0  | 0  | 1  | 0  | 0  |
| 99 | 0  | 0  | 0  | 1  | 0  | 0  |
| 4  | 2  | 2  | 1  | 2  | 2  | 1  |

|    |   |   |   |   |   |   |    |
|----|---|---|---|---|---|---|----|
| 4  | 1 | 1 | 1 | 1 | 1 | 1 | 1  |
| 3  | 1 | 0 | 0 | 0 | 1 | 0 | 0  |
| 3  | 0 | 0 | 0 | 0 | 0 | 0 | 0  |
| 2  | 1 | 0 | 0 | 0 | 1 | 0 | 0  |
| 4  | 1 | 0 | 0 | 0 | 1 | 0 | 0  |
| 3  | 2 | 0 | 0 | 0 | 1 | 2 | 0  |
| 4  | 2 | 0 | 2 | 2 | 2 | 1 | 99 |
| 4  | 0 | 0 | 0 | 0 | 0 | 0 | 0  |
| 1  | 0 | 0 | 0 | 0 | 0 | 0 | 0  |
| 99 | 2 | 2 | 0 | 2 | 2 | 2 | 0  |
| 1  | 1 | 0 | 2 | 1 | 2 | 2 | 99 |
| 4  | 2 | 2 | 2 | 2 | 2 | 2 | 2  |
| 4  | 1 | 0 | 0 | 0 | 2 | 0 | 0  |
| 1  | 2 | 1 | 0 | 1 | 1 | 0 | 0  |
| 2  | 2 | 2 | 2 | 2 | 2 | 2 | 2  |
| 3  | 1 | 1 | 1 | 1 | 1 | 1 | 0  |
| 4  | 2 | 1 | 0 | 0 | 1 | 0 | 1  |
| 4  | 0 | 0 | 0 | 0 | 2 | 0 | 0  |
| 4  | 1 | 1 | 0 | 0 | 0 | 0 | 0  |
| 2  | 0 | 0 | 0 | 0 | 0 | 0 | 0  |
| 4  | 0 | 0 | 0 | 0 | 0 | 0 | 0  |
| 2  | 1 | 0 | 1 | 1 | 1 | 0 | 0  |
| 4  | 0 | 0 | 0 | 0 | 1 | 0 | 0  |
| 2  | 1 | 0 | 1 | 1 | 1 | 2 | 0  |
| 4  | 0 | 0 | 1 | 1 | 1 | 0 | 0  |
| 2  | 0 | 0 | 0 | 0 | 0 | 0 | 0  |
| 3  | 1 | 0 | 0 | 0 | 1 | 1 | 2  |
| 3  | 0 | 0 | 0 | 0 | 1 | 0 | 0  |
| 4  | 0 | 0 | 0 | 0 | 1 | 0 | 0  |
| 3  | 2 | 1 | 1 | 1 | 2 | 0 | 0  |
| 4  | 0 | 0 | 0 | 0 | 0 | 0 | 0  |
| 3  | 1 | 1 | 1 | 1 | 1 | 1 | 1  |
| 3  | 0 | 0 | 2 | 0 | 0 | 0 | 0  |
| 3  | 1 | 1 | 1 | 1 | 0 | 0 | 1  |
| 4  | 0 | 0 | 0 | 0 | 2 | 0 | 0  |
| 1  | 2 | 1 | 2 | 2 | 2 | 0 | 0  |
| 3  | 1 | 0 | 0 | 0 | 0 | 0 | 0  |
| 4  | 1 | 1 | 0 | 2 | 2 | 0 | 1  |
| 2  | 1 | 1 | 1 | 1 | 1 | 0 | 1  |
| 4  | 1 | 1 | 1 | 1 | 2 | 1 | 1  |
| 1  | 1 | 2 | 2 | 2 | 2 | 0 | 0  |
| 1  | 2 | 2 | 2 | 2 | 2 | 2 | 2  |
| 4  | 1 | 1 | 1 | 1 | 1 | 1 | 1  |
| 2  | 1 | 1 | 1 | 1 | 2 | 0 | 0  |
| 2  | 1 | 1 | 1 | 1 | 2 | 0 | 0  |
| 3  | 1 | 0 | 0 | 0 | 2 | 0 | 0  |
| 2  | 1 | 0 | 1 | 1 | 1 | 1 | 0  |
| 2  | 0 | 0 | 0 | 0 | 1 | 0 | 0  |



|    |   |   |    |    |    |    |
|----|---|---|----|----|----|----|
| 3  | 2 | 1 | 2  | 0  | 0  | 0  |
| 2  | 2 | 1 | 2  | 2  | 0  | 0  |
| 4  | 1 | 1 | 0  | 2  | 1  | 2  |
| 4  | 1 | 1 | 1  | 1  | 1  | 1  |
| 4  | 1 | 1 | 1  | 2  | 1  | 2  |
| 2  | 1 | 0 | 0  | 1  | 0  | 0  |
| 4  | 0 | 0 | 0  | 1  | 0  | 0  |
| 4  | 0 | 1 | 0  | 1  | 0  | 0  |
| 3  | 1 | 2 | 1  | 1  | 0  | 1  |
| 4  | 0 | 0 | 0  | 0  | 0  | 0  |
| 2  | 0 | 0 | 0  | 1  | 0  | 0  |
| 99 | 0 | 0 | 0  | 0  | 0  | 0  |
| 2  | 0 | 0 | 0  | 1  | 0  | 0  |
| 99 | 0 | 0 | 0  | 0  | 0  | 0  |
| 2  | 0 | 0 | 0  | 1  | 0  | 0  |
| 99 | 0 | 0 | 0  | 0  | 0  | 0  |
| 4  | 0 | 0 | 0  | 1  | 0  | 0  |
| 4  | 1 | 1 | 99 | 1  | 1  | 0  |
| 2  | 0 | 0 | 0  | 1  | 0  | 1  |
| 4  | 1 | 2 | 2  | 2  | 2  | 2  |
| 4  | 1 | 1 | 1  | 1  | 0  | 1  |
| 2  | 0 | 1 | 0  | 2  | 0  | 0  |
| 1  | 1 | 1 | 0  | 1  | 0  | 0  |
| 99 | 0 | 1 | 0  | 2  | 0  | 1  |
| 4  | 2 | 2 | 2  | 2  | 2  | 0  |
| 2  | 0 | 1 | 0  | 1  | 0  | 0  |
| 3  | 0 | 0 | 2  | 0  | 0  | 0  |
| 3  | 0 | 0 | 0  | 1  | 0  | 0  |
| 3  | 1 | 1 | 1  | 0  | 0  | 0  |
| 2  | 0 | 0 | 0  | 2  | 1  | 2  |
| 2  | 1 | 1 | 1  | 2  | 0  | 1  |
| 3  | 1 | 0 | 1  | 2  | 0  | 0  |
| 99 | 0 | 0 | 0  | 0  | 0  | 0  |
| 2  | 1 | 1 | 0  | 2  | 0  | 2  |
| 3  | 1 | 1 | 1  | 2  | 0  | 1  |
| 3  | 1 | 0 | 1  | 2  | 0  | 0  |
| 99 | 0 | 0 | 0  | 99 | 99 | 99 |
| 3  | 0 | 0 | 0  | 1  | 0  | 0  |
| 2  | 0 | 1 | 0  | 1  | 0  | 0  |
| 4  | 0 | 0 | 0  | 0  | 0  | 0  |
| 4  | 0 | 0 | 0  | 0  | 0  | 0  |
| 1  | 1 | 1 | 0  | 2  | 0  | 1  |
| 2  | 2 | 1 | 1  | 2  | 1  | 1  |
| 3  | 1 | 1 | 1  | 1  | 0  | 0  |
| 1  | 1 | 0 | 1  | 2  | 1  | 1  |
| 3  | 2 | 1 | 2  | 2  | 2  | 1  |
| 4  | 0 | 1 | 1  | 1  | 0  | 0  |
| 3  | 0 | 0 | 0  | 0  | 0  | 0  |

|    |   |    |    |   |   |    |
|----|---|----|----|---|---|----|
| 2  | 1 | 0  | 1  | 1 | 0 | 0  |
| 4  | 1 | 0  | 0  | 1 | 0 | 1  |
| 2  | 2 | 1  | 1  | 2 | 1 | 1  |
| 4  | 0 | 0  | 0  | 1 | 0 | 1  |
| 2  | 0 | 0  | 0  | 1 | 0 | 0  |
| 2  | 1 | 0  | 0  | 2 | 0 | 0  |
| 3  | 0 | 0  | 0  | 1 | 1 | 0  |
| 2  | 1 | 1  | 0  | 1 | 1 | 99 |
| 3  | 1 | 1  | 1  | 1 | 2 | 2  |
| 99 | 0 | 0  | 0  | 0 | 0 | 0  |
| 3  | 1 | 0  | 0  | 2 | 0 | 0  |
| 3  | 0 | 0  | 0  | 0 | 0 | 0  |
| 2  | 2 | 2  | 2  | 2 | 2 | 2  |
| 4  | 0 | 0  | 0  | 0 | 0 | 0  |
| 1  | 1 | 0  | 0  | 2 | 0 | 0  |
| 3  | 0 | 0  | 0  | 2 | 0 | 0  |
| 4  | 0 | 0  | 0  | 1 | 0 | 0  |
| 4  | 1 | 2  | 1  | 2 | 0 | 2  |
| 2  | 1 | 0  | 1  | 2 | 1 | 1  |
| 3  | 0 | 1  | 0  | 1 | 0 | 0  |
| 3  | 1 | 0  | 0  | 1 | 0 | 1  |
| 2  | 1 | 0  | 2  | 1 | 0 | 0  |
| 3  | 0 | 0  | 0  | 1 | 0 | 0  |
| 3  | 1 | 1  | 0  | 2 | 0 | 1  |
| 4  | 0 | 0  | 0  | 0 | 0 | 0  |
| 2  | 1 | 0  | 1  | 2 | 0 | 0  |
| 4  | 1 | 0  | 1  | 1 | 0 | 1  |
| 3  | 2 | 1  | 1  | 1 | 1 | 1  |
| 3  | 2 | 1  | 1  | 1 | 0 | 1  |
| 2  | 2 | 1  | 2  | 2 | 1 | 1  |
| 2  | 1 | 1  | 1  | 1 | 1 | 1  |
| 3  | 1 | 1  | 1  | 1 | 0 | 1  |
| 4  | 0 | 0  | 0  | 1 | 0 | 0  |
| 4  | 2 | 0  | 2  | 2 | 2 | 1  |
| 3  | 1 | 1  | 0  | 2 | 1 | 1  |
| 4  | 0 | 0  | 0  | 1 | 0 | 0  |
| 2  | 1 | 99 | 1  | 2 | 1 | 1  |
| 4  | 2 | 2  | 1  | 2 | 2 | 2  |
| 1  | 0 | 0  | 0  | 0 | 0 | 0  |
| 2  | 2 | 1  | 1  | 2 | 1 | 0  |
| 1  | 0 | 0  | 0  | 0 | 0 | 0  |
| 4  | 2 | 1  | 0  | 1 | 0 | 2  |
| 3  | 0 | 0  | 0  | 0 | 0 | 0  |
| 2  | 0 | 0  | 99 | 1 | 0 | 0  |
| 2  | 0 | 0  | 0  | 0 | 0 | 0  |
| 4  | 1 | 0  | 0  | 1 | 0 | 1  |
| 4  | 2 | 0  | 0  | 2 | 0 | 0  |
| 3  | 1 | 1  | 1  | 1 | 0 | 1  |

|    |    |    |    |   |    |    |    |
|----|----|----|----|---|----|----|----|
| 4  | 0  | 0  | 0  | 0 | 0  | 0  | 0  |
| 2  | 0  | 0  | 0  | 0 | 1  | 0  | 0  |
| 2  | 0  | 0  | 0  | 0 | 1  | 0  | 0  |
| 2  | 1  | 0  | 1  | 0 | 0  | 0  | 1  |
| 3  | 0  | 0  | 0  | 0 | 0  | 0  | 0  |
| 3  | 0  | 0  | 0  | 0 | 1  | 0  | 0  |
| 2  | 1  | 0  | 0  | 0 | 1  | 0  | 1  |
| 4  | 1  | 0  | 1  | 0 | 0  | 0  | 0  |
| 1  | 1  | 0  | 0  | 0 | 0  | 0  | 0  |
| 4  | 1  | 0  | 1  | 1 | 1  | 0  | 1  |
| 4  | 1  | 0  | 0  | 0 | 1  | 0  | 1  |
| 4  | 1  | 0  | 1  | 1 | 1  | 0  | 1  |
| 4  | 0  | 0  | 0  | 0 | 0  | 0  | 0  |
| 4  | 0  | 1  | 0  | 0 | 1  | 0  | 0  |
| 3  | 1  | 0  | 0  | 0 | 2  | 0  | 0  |
| 3  | 2  | 2  | 99 | 1 | 99 | 1  | 1  |
| 4  | 0  | 0  | 0  | 0 | 1  | 0  | 0  |
| 3  | 0  | 0  | 0  | 0 | 0  | 0  | 0  |
| 4  | 0  | 0  | 0  | 0 | 1  | 0  | 1  |
| 4  | 0  | 0  | 0  | 0 | 0  | 0  | 0  |
| 4  | 0  | 0  | 1  | 2 | 0  | 0  | 0  |
| 2  | 0  | 0  | 0  | 0 | 1  | 0  | 0  |
| 3  | 2  | 1  | 1  | 1 | 1  | 2  | 0  |
| 4  | 0  | 0  | 0  | 0 | 1  | 0  | 0  |
| 4  | 1  | 0  | 1  | 1 | 1  | 0  | 0  |
| 1  | 1  | 0  | 0  | 0 | 99 | 1  | 1  |
| 1  | 0  | 0  | 0  | 0 | 1  | 0  | 0  |
| 3  | 0  | 0  | 0  | 0 | 0  | 0  | 0  |
| 99 | 0  | 0  | 0  | 0 | 0  | 0  | 0  |
| 3  | 0  | 0  | 0  | 0 | 0  | 0  | 0  |
| 4  | 0  | 0  | 0  | 0 | 0  | 0  | 0  |
| 3  | 0  | 0  | 0  | 0 | 1  | 0  | 0  |
| 4  | 0  | 0  | 0  | 0 | 0  | 0  | 0  |
| 4  | 99 | 99 | 2  | 2 | 99 | 99 | 99 |
| 2  | 1  | 1  | 0  | 1 | 1  | 0  | 0  |
| 3  | 0  | 0  | 0  | 2 | 0  | 0  | 0  |
| 4  | 1  | 0  | 0  | 0 | 0  | 0  | 0  |
| 2  | 0  | 0  | 0  | 2 | 0  | 0  | 1  |
| 4  | 0  | 99 | 0  | 2 | 0  | 0  | 0  |
| 3  | 0  | 0  | 0  | 0 | 0  | 0  | 0  |
| 4  | 1  | 0  | 0  | 1 | 0  | 0  | 0  |
| 4  | 0  | 0  | 0  | 0 | 0  | 0  | 0  |
| 3  | 0  | 0  | 0  | 0 | 0  | 0  | 0  |
| 4  | 1  | 1  | 1  | 1 | 1  | 1  | 1  |
| 3  | 2  | 1  | 2  | 1 | 1  | 1  | 1  |
| 2  | 1  | 1  | 1  | 2 | 0  | 0  | 0  |
| 2  | 0  | 0  | 0  | 1 | 0  | 0  | 0  |
| 99 | 1  | 0  | 0  | 1 | 0  | 0  | 0  |

|    |    |    |    |    |    |    |
|----|----|----|----|----|----|----|
| 1  | 0  | 0  | 99 | 1  | 0  | 0  |
| 4  | 1  | 1  | 1  | 1  | 1  | 1  |
| 3  | 0  | 0  | 0  | 1  | 0  | 0  |
| 4  | 0  | 0  | 0  | 0  | 0  | 0  |
| 2  | 1  | 0  | 2  | 2  | 0  | 0  |
| 99 | 1  | 1  | 0  | 1  | 0  | 0  |
| 4  | 0  | 1  | 0  | 0  | 0  | 0  |
| 2  | 1  | 0  | 0  | 2  | 1  | 1  |
| 4  | 1  | 0  | 0  | 1  | 0  | 1  |
| 1  | 0  | 0  | 0  | 1  | 0  | 0  |
| 2  | 1  | 1  | 1  | 2  | 0  | 2  |
| 3  | 0  | 0  | 1  | 1  | 0  | 0  |
| 99 | 1  | 0  | 99 | 1  | 0  | 1  |
| 4  | 2  | 2  | 2  | 2  | 2  | 1  |
| 4  | 1  | 1  | 0  | 1  | 1  | 1  |
| 3  | 0  | 0  | 0  | 1  | 0  | 0  |
| 3  | 0  | 0  | 0  | 0  | 0  | 0  |
| 3  | 1  | 0  | 0  | 1  | 0  | 0  |
| 3  | 1  | 1  | 1  | 2  | 0  | 0  |
| 2  | 1  | 0  | 0  | 2  | 0  | 1  |
| 2  | 1  | 0  | 0  | 1  | 0  | 0  |
| 2  | 1  | 0  | 0  | 1  | 0  | 2  |
| 2  | 2  | 2  | 1  | 1  | 2  | 1  |
| 2  | 1  | 1  | 1  | 1  | 1  | 1  |
| 4  | 1  | 1  | 0  | 1  | 1  | 0  |
| 2  | 0  | 0  | 0  | 0  | 0  | 0  |
| 3  | 0  | 1  | 0  | 0  | 0  | 0  |
| 2  | 1  | 0  | 0  | 2  | 1  | 1  |
| 2  | 1  | 1  | 1  | 2  | 1  | 1  |
| 2  | 99 | 0  | 1  | 1  | 0  | 0  |
| 2  | 1  | 0  | 0  | 2  | 0  | 1  |
| 2  | 2  | 1  | 0  | 2  | 0  | 0  |
| 4  | 1  | 2  | 1  | 2  | 1  | 2  |
| 99 | 0  | 1  | 0  | 2  | 0  | 2  |
| 4  | 1  | 1  | 0  | 1  | 1  | 2  |
| 3  | 1  | 1  | 0  | 1  | 0  | 1  |
| 99 | 99 | 99 | 99 | 99 | 99 | 99 |
| 1  | 0  | 0  | 0  | 1  | 0  | 0  |
| 4  | 0  | 0  | 0  | 0  | 0  | 0  |
| 4  | 1  | 1  | 1  | 1  | 1  | 0  |
| 2  | 1  | 0  | 0  | 2  | 1  | 1  |
| 2  | 2  | 2  | 2  | 1  | 2  | 1  |
| 2  | 1  | 0  | 0  | 0  | 1  | 1  |
| 1  | 0  | 0  | 0  | 0  | 0  | 0  |
| 1  | 0  | 0  | 0  | 1  | 0  | 0  |
| 4  | 0  | 0  | 0  | 1  | 0  | 0  |
| 3  | 0  | 0  | 0  | 0  | 0  | 1  |
| 2  | 1  | 0  | 0  | 1  | 1  | 0  |

|    |    |    |    |    |    |    |
|----|----|----|----|----|----|----|
| 2  | 0  | 0  | 0  | 1  | 0  | 0  |
| 3  | 0  | 0  | 0  | 1  | 0  | 0  |
| 2  | 0  | 0  | 0  | 0  | 0  | 0  |
| 3  | 0  | 0  | 0  | 1  | 0  | 0  |
| 3  | 1  | 0  | 0  | 0  | 0  | 0  |
| 3  | 0  | 0  | 0  | 0  | 0  | 0  |
| 1  | 1  | 0  | 0  | 1  | 0  | 0  |
| 3  | 0  | 0  | 0  | 0  | 0  | 0  |
| 2  | 1  | 1  | 0  | 0  | 0  | 0  |
| 2  | 0  | 0  | 0  | 0  | 0  | 0  |
| 1  | 0  | 0  | 0  | 0  | 0  | 0  |
| 3  | 0  | 0  | 0  | 0  | 0  | 0  |
| 4  | 0  | 0  | 0  | 0  | 0  | 0  |
| 3  | 0  | 0  | 0  | 0  | 0  | 0  |
| 3  | 1  | 0  | 1  | 1  | 0  | 0  |
| 4  | 0  | 0  | 0  | 0  | 0  | 0  |
| 4  | 2  | 1  | 2  | 2  | 1  | 1  |
| 3  | 0  | 0  | 0  | 0  | 0  | 0  |
| 2  | 1  | 0  | 0  | 1  | 0  | 1  |
| 4  | 1  | 0  | 0  | 0  | 0  | 0  |
| 4  | 0  | 0  | 0  | 1  | 0  | 0  |
| 3  | 0  | 0  | 0  | 1  | 0  | 0  |
| 99 | 99 | 99 | 99 | 99 | 99 | 99 |
| 99 | 0  | 0  | 0  | 1  | 0  | 0  |
| 1  | 1  | 0  | 1  | 2  | 0  | 1  |
| 3  | 1  | 0  | 1  | 2  | 0  | 0  |
| 4  | 2  | 1  | 0  | 2  | 1  | 0  |
| 3  | 1  | 0  | 0  | 0  | 0  | 0  |
| 3  | 0  | 0  | 0  | 0  | 0  | 0  |
| 3  | 0  | 0  | 0  | 0  | 0  | 0  |
| 2  | 0  | 0  | 0  | 0  | 0  | 0  |
| 4  | 0  | 0  | 0  | 0  | 0  | 0  |
| 2  | 1  | 0  | 0  | 1  | 1  | 0  |
| 3  | 0  | 0  | 0  | 0  | 0  | 0  |
| 3  | 0  | 0  | 0  | 2  | 1  | 1  |
| 2  | 0  | 0  | 0  | 2  | 0  | 0  |
| 2  | 0  | 0  | 0  | 0  | 0  | 0  |
| 99 | 99 | 99 | 99 | 99 | 99 | 99 |
| 1  | 1  | 1  | 1  | 1  | 0  | 0  |
| 3  | 2  | 1  | 2  | 2  | 1  | 1  |
| 3  | 0  | 0  | 0  | 0  | 0  | 0  |
| 4  | 2  | 0  | 1  | 2  | 2  | 2  |
| 3  | 1  | 0  | 1  | 2  | 1  | 0  |
| 3  | 0  | 0  | 0  | 1  | 0  | 0  |
| 4  | 0  | 1  | 0  | 0  | 0  | 0  |
| 3  | 2  | 1  | 2  | 2  | 0  | 1  |
| 3  | 0  | 1  | 0  | 1  | 0  | 0  |
| 2  | 0  | 0  | 0  | 1  | 0  | 0  |

|    |    |    |    |    |    |    |
|----|----|----|----|----|----|----|
| 99 | 99 | 99 | 99 | 99 | 99 | 99 |
| 3  | 1  | 1  | 1  | 1  | 1  | 99 |
| 3  | 1  | 0  | 2  | 1  | 0  | 0  |
| 4  | 0  | 0  | 0  | 0  | 0  | 0  |
| 3  | 1  | 0  | 1  | 2  | 0  | 0  |
| 3  | 0  | 0  | 0  | 1  | 0  | 0  |
| 99 | 1  | 99 | 99 | 1  | 99 | 99 |
| 2  | 0  | 0  | 0  | 1  | 0  | 0  |
| 2  | 1  | 0  | 0  | 1  | 0  | 0  |
| 4  | 1  | 0  | 0  | 2  | 0  | 0  |
| 3  | 0  | 0  | 1  | 1  | 0  | 0  |
| 3  | 2  | 2  | 99 | 2  | 0  | 0  |
| 3  | 1  | 0  | 1  | 2  | 0  | 0  |
| 4  | 0  | 0  | 0  | 0  | 0  | 0  |
| 1  | 1  | 1  | 0  | 2  | 1  | 1  |
| 4  | 0  | 1  | 1  | 1  | 1  | 1  |
| 2  | 0  | 1  | 0  | 1  | 0  | 0  |
| 3  | 1  | 2  | 2  | 1  | 0  | 0  |
| 3  | 0  | 0  | 0  | 0  | 0  | 0  |
| 1  | 1  | 2  | 2  | 2  | 2  | 1  |
| 4  | 1  | 1  | 0  | 2  | 1  | 0  |
| 2  | 1  | 1  | 1  | 1  | 1  | 1  |
| 99 | 0  | 0  | 99 | 2  | 99 | 99 |
| 4  | 1  | 0  | 0  | 1  | 0  | 0  |
| 3  | 1  | 0  | 0  | 2  | 1  | 1  |
| 4  | 1  | 0  | 0  | 1  | 0  | 1  |
| 3  | 0  | 0  | 0  | 0  | 0  | 0  |
| 99 | 1  | 2  | 1  | 2  | 1  | 2  |
| 3  | 1  | 1  | 1  | 1  | 0  | 0  |
| 3  | 0  | 0  | 0  | 0  | 0  | 0  |
| 3  | 0  | 0  | 0  | 2  | 0  | 0  |
| 4  | 0  | 0  | 0  | 2  | 0  | 0  |
| 4  | 0  | 0  | 0  | 1  | 0  | 0  |
| 3  | 0  | 0  | 0  | 1  | 0  | 0  |
| 1  | 1  | 1  | 1  | 1  | 1  | 1  |
| 2  | 0  | 0  | 99 | 2  | 0  | 0  |
| 3  | 1  | 0  | 0  | 1  | 0  | 0  |
| 3  | 99 | 99 | 99 | 1  | 99 | 99 |
| 4  | 0  | 0  | 0  | 0  | 0  | 0  |
| 4  | 0  | 0  | 1  | 2  | 1  | 0  |
| 4  | 2  | 2  | 1  | 0  | 1  | 1  |
| 1  | 2  | 1  | 1  | 1  | 2  | 1  |
| 3  | 1  | 0  | 0  | 1  | 1  | 0  |
| 4  | 0  | 0  | 0  | 0  | 0  | 0  |
| 3  | 1  | 1  | 0  | 1  | 2  | 0  |
| 4  | 0  | 0  | 0  | 0  | 0  | 0  |
| 99 | 0  | 0  | 99 | 99 | 99 | 99 |
| 4  | 2  | 1  | 2  | 2  | 1  | 0  |

|    |    |    |    |    |    |    |
|----|----|----|----|----|----|----|
| 3  | 0  | 0  | 1  | 2  | 0  | 0  |
| 99 | 2  | 2  | 2  | 2  | 2  | 1  |
| 2  | 0  | 0  | 0  | 0  | 0  | 0  |
| 3  | 0  | 1  | 0  | 2  | 0  | 1  |
| 1  | 1  | 1  | 1  | 1  | 1  | 1  |
| 4  | 0  | 0  | 0  | 0  | 0  | 0  |
| 4  | 0  | 1  | 1  | 0  | 0  | 0  |
| 4  | 1  | 0  | 0  | 2  | 1  | 1  |
| 3  | 1  | 1  | 0  | 1  | 1  | 0  |
| 4  | 1  | 1  | 0  | 1  | 0  | 0  |
| 4  | 0  | 0  | 0  | 0  | 0  | 0  |
| 3  | 0  | 0  | 0  | 0  | 0  | 0  |
| 3  | 1  | 0  | 0  | 1  | 0  | 0  |
| 2  | 0  | 0  | 0  | 0  | 0  | 0  |
| 2  | 0  | 0  | 0  | 0  | 0  | 1  |
| 2  | 0  | 0  | 0  | 1  | 0  | 0  |
| 3  | 1  | 1  | 0  | 1  | 0  | 1  |
| 3  | 1  | 0  | 0  | 2  | 0  | 0  |
| 4  | 0  | 0  | 0  | 0  | 0  | 0  |
| 4  | 0  | 0  | 0  | 1  | 0  | 0  |
| 4  | 0  | 0  | 0  | 1  | 0  | 0  |
| 99 | 0  | 0  | 0  | 0  | 0  | 0  |
| 2  | 1  | 1  | 0  | 2  | 0  | 0  |
| 4  | 0  | 99 | 0  | 0  | 0  | 0  |
| 2  | 1  | 0  | 2  | 1  | 0  | 0  |
| 3  | 2  | 1  | 99 | 2  | 1  | 1  |
| 3  | 0  | 0  | 0  | 1  | 0  | 0  |
| 4  | 0  | 0  | 0  | 0  | 0  | 0  |
| 1  | 2  | 2  | 2  | 2  | 2  | 2  |
| 3  | 0  | 0  | 0  | 0  | 0  | 0  |
| 3  | 1  | 1  | 0  | 1  | 0  | 0  |
| 1  | 1  | 0  | 1  | 0  | 2  | 2  |
| 3  | 1  | 0  | 1  | 2  | 0  | 0  |
| 3  | 1  | 0  | 1  | 0  | 0  | 0  |
| 4  | 0  | 0  | 0  | 1  | 0  | 1  |
| 2  | 0  | 0  | 0  | 0  | 0  | 0  |
| 4  | 0  | 0  | 0  | 0  | 0  | 0  |
| 4  | 1  | 0  | 1  | 1  | 1  | 1  |
| 4  | 99 | 99 | 99 | 99 | 99 | 99 |
| 1  | 0  | 0  | 0  | 0  | 0  | 0  |
| 4  | 0  | 0  | 0  | 0  | 0  | 0  |
| 4  | 1  | 0  | 0  | 0  | 0  | 1  |
| 3  | 1  | 1  | 1  | 1  | 0  | 0  |
| 2  | 0  | 0  | 0  | 0  | 0  | 0  |
| 4  | 0  | 0  | 0  | 1  | 0  | 0  |
| 4  | 0  | 0  | 1  | 1  | 0  | 0  |
| 4  | 2  | 1  | 2  | 1  | 1  | 2  |
| 3  | 1  | 0  | 0  | 2  | 0  | 1  |

|    |    |    |    |    |    |    |
|----|----|----|----|----|----|----|
| 3  | 0  | 0  | 1  | 2  | 1  | 1  |
| 2  | 0  | 0  | 0  | 1  | 0  | 1  |
| 3  | 1  | 1  | 0  | 2  | 0  | 0  |
| 3  | 1  | 2  | 1  | 2  | 0  | 0  |
| 4  | 1  | 1  | 2  | 2  | 0  | 1  |
| 3  | 0  | 0  | 0  | 1  | 0  | 0  |
| 4  | 1  | 1  | 1  | 2  | 1  | 1  |
| 99 | 0  | 0  | 0  | 1  | 0  | 0  |
| 3  | 0  | 0  | 0  | 0  | 0  | 0  |
| 3  | 1  | 1  | 1  | 2  | 1  | 1  |
| 1  | 2  | 1  | 0  | 1  | 0  | 0  |
| 4  | 1  | 0  | 0  | 1  | 0  | 0  |
| 4  | 0  | 1  | 0  | 1  | 1  | 0  |
| 2  | 0  | 1  | 0  | 1  | 0  | 1  |
| 3  | 1  | 0  | 0  | 1  | 0  | 0  |
| 1  | 2  | 1  | 1  | 2  | 0  | 2  |
| 4  | 0  | 0  | 0  | 1  | 0  | 0  |
| 4  | 0  | 0  | 0  | 1  | 0  | 0  |
| 2  | 1  | 1  | 2  | 1  | 1  | 0  |
| 99 | 1  | 0  | 0  | 1  | 0  | 0  |
| 1  | 2  | 1  | 2  | 0  | 1  | 0  |
| 4  | 1  | 0  | 2  | 2  | 0  | 1  |
| 3  | 0  | 0  | 0  | 1  | 0  | 0  |
| 4  | 1  | 1  | 2  | 1  | 2  | 1  |
| 2  | 1  | 1  | 1  | 1  | 0  | 1  |
| 2  | 1  | 99 | 0  | 2  | 1  | 2  |
| 4  | 0  | 0  | 0  | 1  | 0  | 0  |
| 4  | 1  | 0  | 1  | 2  | 1  | 2  |
| 1  | 2  | 2  | 2  | 2  | 0  | 1  |
| 99 | 99 | 99 | 99 | 99 | 99 | 99 |
| 3  | 0  | 0  | 0  | 1  | 0  | 0  |
| 4  | 1  | 0  | 0  | 2  | 1  | 2  |
| 1  | 1  | 1  | 1  | 2  | 0  | 0  |
| 3  | 0  | 0  | 0  | 0  | 0  | 0  |
| 3  | 0  | 0  | 0  | 2  | 0  | 0  |
| 4  | 0  | 0  | 0  | 0  | 0  | 0  |
| 4  | 0  | 0  | 0  | 1  | 0  | 0  |
| 4  | 1  | 2  | 0  | 2  | 0  | 0  |
| 4  | 0  | 0  | 0  | 0  | 0  | 0  |
| 3  | 0  | 0  | 0  | 2  | 0  | 0  |
| 1  | 0  | 0  | 0  | 0  | 0  | 0  |
| 3  | 1  | 0  | 1  | 2  | 0  | 0  |
| 4  | 1  | 1  | 1  | 99 | 99 | 1  |
| 4  | 0  | 0  | 0  | 0  | 0  | 0  |
| 4  | 1  | 0  | 0  | 0  | 0  | 0  |
| 4  | 1  | 0  | 1  | 1  | 0  | 0  |
| 4  | 1  | 1  | 1  | 1  | 1  | 1  |
| 3  | 1  | 0  | 0  | 1  | 0  | 0  |



|    |   |   |   |   |   |    |
|----|---|---|---|---|---|----|
| 3  | 2 | 0 | 1 | 1 | 0 | 0  |
| 3  | 1 | 0 | 0 | 2 | 0 | 0  |
| 2  | 2 | 2 | 0 | 2 | 0 | 0  |
| 1  | 0 | 0 | 0 | 0 | 0 | 0  |
| 2  | 1 | 0 | 0 | 1 | 0 | 0  |
| 4  | 1 | 1 | 0 | 1 | 0 | 0  |
| 2  | 0 | 1 | 0 | 1 | 0 | 0  |
| 4  | 1 | 0 | 0 | 1 | 0 | 0  |
| 4  | 1 | 0 | 0 | 1 | 0 | 0  |
| 4  | 0 | 0 | 1 | 0 | 1 | 0  |
| 2  | 0 | 0 | 0 | 0 | 0 | 0  |
| 3  | 1 | 0 | 1 | 0 | 0 | 0  |
| 4  | 0 | 0 | 0 | 1 | 0 | 99 |
| 4  | 1 | 1 | 0 | 0 | 0 | 1  |
| 2  | 0 | 0 | 0 | 1 | 0 | 0  |
| 4  | 0 | 0 | 0 | 1 | 0 | 1  |
| 2  | 0 | 0 | 0 | 1 | 0 | 0  |
| 4  | 1 | 1 | 2 | 0 | 0 | 0  |
| 2  | 0 | 0 | 0 | 0 | 0 | 0  |
| 4  | 0 | 0 | 1 | 2 | 0 | 0  |
| 2  | 2 | 1 | 1 | 0 | 0 | 0  |
| 4  | 2 | 1 | 2 | 2 | 1 | 0  |
| 3  | 1 | 1 | 1 | 1 | 0 | 1  |
| 1  | 1 | 2 | 0 | 1 | 0 | 0  |
| 4  | 1 | 1 | 0 | 2 | 0 | 0  |
| 3  | 0 | 0 | 0 | 1 | 0 | 0  |
| 3  | 0 | 0 | 0 | 1 | 0 | 0  |
| 2  | 0 | 0 | 0 | 0 | 0 | 0  |
| 99 | 0 | 0 | 0 | 1 | 0 | 0  |
| 4  | 1 | 0 | 0 | 0 | 0 | 0  |
| 3  | 2 | 1 | 2 | 1 | 0 | 1  |
| 4  | 0 | 0 | 0 | 0 | 0 | 0  |
| 2  | 1 | 1 | 2 | 2 | 1 | 1  |
| 3  | 1 | 0 | 0 | 2 | 0 | 0  |
| 4  | 1 | 0 | 0 | 1 | 0 | 0  |
| 2  | 0 | 0 | 1 | 1 | 0 | 0  |
| 1  | 0 | 1 | 1 | 0 | 1 | 1  |
| 2  | 1 | 0 | 1 | 2 | 1 | 2  |
| 1  | 0 | 0 | 0 | 1 | 1 | 1  |
| 2  | 1 | 1 | 1 | 2 | 2 | 1  |
| 2  | 0 | 0 | 0 | 1 | 0 | 0  |
| 4  | 1 | 0 | 2 | 2 | 0 | 0  |
| 2  | 0 | 0 | 0 | 1 | 0 | 0  |
| 2  | 1 | 1 | 1 | 0 | 0 | 0  |
| 3  | 1 | 0 | 0 | 0 | 0 | 0  |
| 3  | 1 | 1 | 0 | 2 | 0 | 0  |
| 2  | 2 | 2 | 2 | 2 | 2 | 2  |
| 3  | 1 | 1 | 1 | 2 | 1 | 0  |

|    |    |    |    |    |    |    |
|----|----|----|----|----|----|----|
| 4  | 2  | 0  | 1  | 2  | 0  | 0  |
| 2  | 0  | 0  | 0  | 1  | 0  | 0  |
| 4  | 1  | 0  | 1  | 0  | 0  | 0  |
| 2  | 2  | 2  | 2  | 2  | 2  | 2  |
| 3  | 1  | 1  | 1  | 2  | 1  | 1  |
| 3  | 1  | 0  | 1  | 1  | 0  | 0  |
| 1  | 0  | 0  | 0  | 1  | 0  | 1  |
| 4  | 0  | 2  | 1  | 1  | 2  | 2  |
| 4  | 1  | 1  | 1  | 1  | 1  | 1  |
| 2  | 99 | 1  | 0  | 0  | 0  | 0  |
| 2  | 1  | 1  | 1  | 1  | 1  | 2  |
| 3  | 1  | 0  | 1  | 1  | 1  | 2  |
| 2  | 1  | 1  | 1  | 2  | 0  | 1  |
| 2  | 0  | 0  | 0  | 2  | 0  | 1  |
| 2  | 1  | 1  | 1  | 1  | 1  | 1  |
| 1  | 0  | 0  | 0  | 2  | 0  | 1  |
| 4  | 0  | 0  | 0  | 2  | 1  | 0  |
| 2  | 0  | 0  | 0  | 1  | 0  | 0  |
| 99 | 1  | 99 | 99 | 2  | 99 | 99 |
| 2  | 1  | 0  | 1  | 2  | 1  | 1  |
| 4  | 0  | 0  | 0  | 0  | 0  | 0  |
| 2  | 1  | 1  | 0  | 2  | 1  | 0  |
| 4  | 0  | 0  | 0  | 1  | 0  | 0  |
| 3  | 1  | 0  | 0  | 1  | 0  | 0  |
| 4  | 1  | 0  | 0  | 0  | 0  | 0  |
| 3  | 1  | 99 | 99 | 1  | 0  | 99 |
| 2  | 1  | 1  | 0  | 2  | 0  | 0  |
| 2  | 0  | 0  | 0  | 0  | 0  | 0  |
| 2  | 0  | 0  | 0  | 2  | 0  | 0  |
| 3  | 2  | 2  | 2  | 2  | 2  | 2  |
| 99 | 0  | 0  | 0  | 0  | 0  | 0  |
| 3  | 0  | 0  | 0  | 1  | 0  | 0  |
| 2  | 0  | 0  | 0  | 0  | 0  | 0  |
| 99 | 1  | 0  | 0  | 1  | 1  | 1  |
| 3  | 0  | 0  | 0  | 0  | 0  | 0  |
| 4  | 1  | 0  | 2  | 1  | 2  | 2  |
| 4  | 1  | 0  | 1  | 2  | 2  | 0  |
| 1  | 1  | 2  | 1  | 2  | 1  | 1  |
| 2  | 0  | 0  | 0  | 0  | 0  | 0  |
| 4  | 1  | 0  | 1  | 2  | 0  | 0  |
| 4  | 0  | 0  | 1  | 0  | 0  | 1  |
| 4  | 0  | 99 | 99 | 1  | 0  | 0  |
| 3  | 1  | 1  | 0  | 1  | 0  | 0  |
| 4  | 0  | 1  | 0  | 0  | 0  | 0  |
| 1  | 1  | 0  | 0  | 2  | 0  | 1  |
| 4  | 0  | 0  | 0  | 99 | 0  | 0  |
| 4  | 0  | 0  | 0  | 0  | 0  | 0  |
| 2  | 2  | 0  | 2  | 2  | 0  | 0  |

|    |    |    |    |    |    |    |
|----|----|----|----|----|----|----|
| 4  | 1  | 0  | 0  | 2  | 0  | 1  |
| 99 | 1  | 0  | 0  | 1  | 0  | 0  |
| 4  | 1  | 0  | 0  | 0  | 0  | 0  |
| 4  | 2  | 0  | 1  | 1  | 0  | 0  |
| 2  | 1  | 0  | 0  | 1  | 1  | 1  |
| 99 | 0  | 0  | 0  | 0  | 0  | 0  |
| 4  | 1  | 0  | 2  | 2  | 0  | 0  |
| 3  | 0  | 1  | 0  | 2  | 0  | 1  |
| 2  | 1  | 1  | 1  | 2  | 1  | 0  |
| 4  | 1  | 1  | 1  | 1  | 0  | 1  |
| 2  | 99 | 99 | 99 | 99 | 99 | 99 |
| 4  | 2  | 2  | 2  | 2  | 2  | 1  |
| 4  | 1  | 1  | 0  | 1  | 0  | 0  |
| 3  | 1  | 1  | 0  | 2  | 0  | 1  |
| 3  | 1  | 1  | 1  | 0  | 1  | 0  |
| 4  | 0  | 0  | 0  | 1  | 0  | 0  |
| 2  | 0  | 0  | 0  | 1  | 0  | 0  |
| 3  | 0  | 0  | 0  | 0  | 0  | 0  |
| 3  | 1  | 1  | 0  | 2  | 2  | 1  |
| 2  | 2  | 1  | 2  | 0  | 0  | 1  |
| 4  | 1  | 0  | 2  | 1  | 1  | 1  |
| 4  | 0  | 1  | 0  | 0  | 0  | 0  |
| 2  | 1  | 1  | 1  | 0  | 0  | 0  |
| 3  | 1  | 0  | 2  | 2  | 2  | 0  |
| 4  | 2  | 1  | 1  | 2  | 0  | 0  |
| 1  | 2  | 1  | 2  | 2  | 1  | 1  |
| 99 | 0  | 1  | 0  | 1  | 0  | 1  |
| 3  | 0  | 0  | 0  | 0  | 0  | 1  |
| 1  | 1  | 1  | 0  | 0  | 0  | 1  |
| 2  | 2  | 2  | 2  | 2  | 2  | 2  |
| 4  | 1  | 1  | 0  | 2  | 0  | 0  |
| 4  | 1  | 1  | 0  | 1  | 0  | 0  |
| 2  | 0  | 0  | 0  | 0  | 0  | 0  |
| 2  | 0  | 0  | 0  | 1  | 0  | 2  |
| 3  | 1  | 1  | 2  | 2  | 1  | 0  |
| 2  | 2  | 1  | 2  | 1  | 1  | 1  |
| 2  | 0  | 0  | 0  | 1  | 1  | 0  |
| 3  | 0  | 1  | 0  | 2  | 0  | 0  |
| 2  | 0  | 0  | 2  | 2  | 1  | 1  |
| 2  | 1  | 0  | 0  | 2  | 0  | 0  |
| 2  | 1  | 0  | 0  | 1  | 0  | 0  |
| 4  | 0  | 0  | 0  | 2  | 0  | 1  |
| 2  | 1  | 1  | 1  | 1  | 1  | 1  |
| 3  | 2  | 1  | 1  | 2  | 0  | 2  |
| 1  | 0  | 0  | 0  | 1  | 0  | 0  |
| 4  | 0  | 0  | 1  | 0  | 0  | 0  |
| 2  | 0  | 0  | 0  | 1  | 0  | 0  |
| 3  | 0  | 0  | 0  | 1  | 0  | 1  |

|    |    |    |    |    |    |    |    |
|----|----|----|----|----|----|----|----|
| 4  | 0  | 0  | 0  | 0  | 0  | 0  | 0  |
| 2  | 2  | 0  | 0  | 0  | 1  | 0  | 1  |
| 4  | 0  | 0  | 0  | 0  | 1  | 0  | 0  |
| 4  | 1  | 1  | 1  | 1  | 2  | 1  | 1  |
| 2  | 0  | 0  | 0  | 0  | 2  | 0  | 0  |
| 2  | 1  | 0  | 0  | 0  | 1  | 0  | 0  |
| 99 | 1  | 0  | 0  | 0  | 1  | 1  | 1  |
| 3  | 1  | 0  | 99 | 1  | 1  | 1  | 1  |
| 99 | 1  | 0  | 1  | 1  | 1  | 1  | 1  |
| 2  | 0  | 0  | 0  | 1  | 1  | 0  | 0  |
| 2  | 1  | 0  | 1  | 2  | 1  | 1  | 0  |
| 4  | 1  | 0  | 0  | 0  | 1  | 0  | 0  |
| 3  | 2  | 1  | 1  | 2  | 2  | 1  | 1  |
| 3  | 0  | 0  | 0  | 0  | 0  | 0  | 0  |
| 3  | 0  | 0  | 0  | 0  | 1  | 0  | 0  |
| 4  | 0  | 0  | 0  | 0  | 1  | 0  | 0  |
| 2  | 0  | 0  | 0  | 0  | 0  | 0  | 0  |
| 2  | 0  | 0  | 0  | 0  | 1  | 0  | 0  |
| 3  | 0  | 0  | 1  | 1  | 1  | 0  | 0  |
| 3  | 0  | 0  | 0  | 0  | 0  | 0  | 0  |
| 4  | 0  | 0  | 0  | 0  | 0  | 0  | 0  |
| 4  | 1  | 1  | 0  | 0  | 1  | 0  | 0  |
| 4  | 1  | 0  | 0  | 0  | 2  | 0  | 1  |
| 1  | 99 | 99 | 99 | 99 | 99 | 99 | 99 |
| 2  | 1  | 0  | 1  | 2  | 2  | 0  | 0  |
| 3  | 2  | 1  | 2  | 1  | 1  | 0  | 1  |
| 2  | 0  | 0  | 0  | 0  | 0  | 0  | 0  |
| 1  | 1  | 0  | 0  | 0  | 2  | 0  | 1  |
| 3  | 0  | 0  | 0  | 0  | 1  | 0  | 0  |
| 4  | 0  | 0  | 0  | 0  | 0  | 0  | 0  |
| 1  | 0  | 0  | 0  | 0  | 2  | 1  | 0  |
| 4  | 2  | 1  | 1  | 1  | 2  | 2  | 2  |
| 1  | 0  | 0  | 0  | 0  | 2  | 0  | 0  |
| 3  | 0  | 1  | 0  | 0  | 1  | 0  | 0  |
| 2  | 1  | 2  | 2  | 2  | 1  | 2  | 99 |
| 3  | 1  | 1  | 1  | 1  | 1  | 1  | 2  |
| 3  | 2  | 1  | 0  | 0  | 2  | 0  | 2  |
| 4  | 1  | 1  | 0  | 0  | 1  | 0  | 1  |
| 2  | 0  | 0  | 0  | 0  | 2  | 0  | 0  |
| 1  | 1  | 1  | 1  | 1  | 1  | 0  | 1  |
| 3  | 0  | 0  | 0  | 0  | 0  | 0  | 0  |
| 1  | 2  | 0  | 2  | 2  | 2  | 2  | 1  |
| 4  | 0  | 0  | 0  | 0  | 0  | 0  | 0  |
| 4  | 1  | 1  | 1  | 0  | 0  | 0  | 0  |
| 3  | 1  | 99 | 99 | 1  | 1  | 0  | 0  |
| 2  | 1  | 0  | 0  | 0  | 1  | 1  | 0  |
| 3  | 1  | 0  | 0  | 0  | 1  | 0  | 0  |
| 2  | 2  | 0  | 2  | 2  | 2  | 2  | 2  |

|   |   |    |    |    |    |    |
|---|---|----|----|----|----|----|
| 2 | 0 | 0  | 0  | 2  | 0  | 0  |
| 3 | 0 | 0  | 0  | 0  | 0  | 0  |
| 1 | 1 | 0  | 1  | 2  | 1  | 1  |
| 3 | 0 | 99 | 99 | 99 | 99 | 99 |
| 4 | 1 | 0  | 0  | 1  | 0  | 0  |
| 2 | 0 | 0  | 0  | 1  | 0  | 0  |
| 4 | 2 | 2  | 2  | 2  | 2  | 2  |
| 2 | 1 | 0  | 0  | 1  | 0  | 0  |
| 4 | 0 | 0  | 0  | 0  | 0  | 0  |
| 4 | 2 | 0  | 0  | 2  | 0  | 0  |
| 2 | 2 | 1  | 1  | 2  | 1  | 2  |
| 3 | 1 | 0  | 0  | 1  | 0  | 0  |
| 3 | 1 | 0  | 1  | 2  | 1  | 0  |
| 4 | 0 | 0  | 0  | 1  | 0  | 0  |
| 2 | 1 | 0  | 1  | 2  | 0  | 1  |
| 3 | 2 | 2  | 2  | 2  | 2  | 2  |
| 3 | 2 | 2  | 2  | 2  | 2  | 2  |
| 2 | 1 | 1  | 1  | 1  | 1  | 1  |
| 4 | 1 | 1  | 1  | 1  | 1  | 1  |
| 3 | 1 | 0  | 0  | 2  | 0  | 0  |
| 4 | 2 | 0  | 2  | 2  | 2  | 2  |
| 4 | 0 | 0  | 0  | 0  | 0  | 0  |
| 4 | 0 | 0  | 1  | 1  | 1  | 1  |
| 1 | 0 | 0  | 0  | 1  | 1  | 1  |
| 4 | 0 | 0  | 0  | 1  | 0  | 0  |
| 4 | 1 | 1  | 1  | 2  | 1  | 1  |
| 2 | 2 | 2  | 1  | 2  | 1  | 2  |
| 2 | 1 | 1  | 1  | 2  | 1  | 1  |
| 4 | 1 | 1  | 0  | 2  | 0  | 0  |
| 4 | 0 | 0  | 0  | 1  | 0  | 0  |
| 4 | 0 | 0  | 0  | 0  | 0  | 0  |
| 4 | 1 | 0  | 0  | 2  | 0  | 1  |
| 2 | 1 | 1  | 1  | 2  | 1  | 1  |
| 4 | 0 | 0  | 0  | 1  | 0  | 0  |
| 3 | 2 | 1  | 1  | 2  | 1  | 1  |
| 2 | 1 | 1  | 0  | 1  | 0  | 0  |
| 2 | 2 | 2  | 2  | 2  | 2  | 2  |
| 4 | 0 | 0  | 0  | 0  | 0  | 0  |
| 4 | 1 | 0  | 0  | 1  | 0  | 0  |
| 2 | 1 | 1  | 1  | 1  | 1  | 1  |
| 3 | 0 | 0  | 0  | 0  | 0  | 0  |
| 2 | 1 | 0  | 0  | 1  | 0  | 0  |
| 4 | 1 | 0  | 0  | 1  | 2  | 2  |
| 3 | 1 | 0  | 0  | 2  | 0  | 0  |
| 2 | 0 | 0  | 0  | 1  | 0  | 0  |
| 4 | 0 | 0  | 0  | 0  | 0  | 0  |
| 3 | 1 | 0  | 0  | 0  | 0  | 0  |
| 4 | 1 | 1  | 0  | 1  | 0  | 0  |

|    |   |   |   |   |   |   |   |
|----|---|---|---|---|---|---|---|
| 4  | 1 | 0 | 0 | 0 | 0 | 0 | 0 |
| 1  | 2 | 0 | 0 | 0 | 1 | 0 | 1 |
| 2  | 1 | 0 | 0 | 0 | 0 | 0 | 0 |
| 2  | 0 | 1 | 0 | 0 | 1 | 0 | 0 |
| 3  | 0 | 0 | 0 | 0 | 1 | 0 | 0 |
| 3  | 0 | 0 | 0 | 0 | 0 | 0 | 0 |
| 99 | 0 | 0 | 0 | 0 | 0 | 0 | 0 |
| 3  | 0 | 0 | 0 | 0 | 0 | 0 | 0 |
| 4  | 0 | 0 | 0 | 0 | 0 | 0 | 0 |
| 3  | 1 | 0 | 0 | 0 | 1 | 1 | 0 |
| 4  | 1 | 0 | 0 | 0 | 0 | 2 | 0 |
| 2  | 0 | 0 | 0 | 0 | 1 | 0 | 2 |
| 2  | 0 | 0 | 0 | 0 | 2 | 1 | 0 |
| 3  | 0 | 0 | 0 | 0 | 0 | 0 | 0 |
| 4  | 0 | 0 | 0 | 0 | 0 | 0 | 0 |
| 4  | 0 | 1 | 0 | 0 | 1 | 0 | 0 |
| 2  | 1 | 0 | 1 | 1 | 1 | 1 | 0 |
| 3  | 0 | 1 | 1 | 1 | 2 | 0 | 0 |
| 1  | 0 | 0 | 0 | 0 | 1 | 0 | 0 |
| 4  | 1 | 1 | 0 | 0 | 2 | 0 | 1 |
| 4  | 1 | 0 | 0 | 0 | 1 | 0 | 1 |
| 2  | 1 | 1 | 2 | 2 | 2 | 1 | 1 |
| 4  | 1 | 0 | 0 | 0 | 1 | 0 | 1 |
| 2  | 0 | 0 | 0 | 0 | 0 | 0 | 0 |
| 2  | 0 | 0 | 2 | 2 | 1 | 0 | 1 |
| 3  | 0 | 0 | 0 | 0 | 1 | 0 | 0 |
| 2  | 1 | 0 | 0 | 0 | 1 | 2 | 0 |
| 4  | 0 | 0 | 0 | 0 | 0 | 0 | 0 |
| 3  | 0 | 0 | 0 | 0 | 1 | 0 | 1 |
| 1  | 0 | 0 | 0 | 0 | 0 | 0 | 0 |
| 3  | 2 | 0 | 0 | 0 | 1 | 0 | 0 |
| 2  | 0 | 0 | 0 | 0 | 0 | 0 | 0 |
| 3  | 1 | 1 | 1 | 1 | 2 | 0 | 1 |
| 4  | 0 | 0 | 0 | 0 | 0 | 0 | 0 |
| 99 | 1 | 0 | 0 | 0 | 1 | 0 | 0 |
| 3  | 1 | 0 | 0 | 0 | 2 | 0 | 0 |
| 4  | 0 | 0 | 0 | 0 | 0 | 0 | 0 |
| 3  | 1 | 0 | 1 | 1 | 1 | 0 | 0 |
| 3  | 1 | 0 | 0 | 0 | 1 | 0 | 0 |
| 3  | 1 | 0 | 1 | 1 | 2 | 0 | 1 |
| 3  | 0 | 0 | 0 | 0 | 0 | 0 | 0 |
| 4  | 0 | 0 | 0 | 0 | 1 | 0 | 0 |
| 4  | 2 | 1 | 1 | 1 | 2 | 1 | 1 |
| 4  | 2 | 1 | 1 | 1 | 1 | 0 | 0 |
| 4  | 1 | 1 | 0 | 0 | 2 | 0 | 0 |
| 3  | 1 | 0 | 1 | 1 | 1 | 1 | 1 |
| 1  | 1 | 0 | 0 | 0 | 1 | 0 | 0 |
| 2  | 1 | 1 | 1 | 1 | 0 | 0 | 0 |

|    |   |   |    |    |    |    |   |
|----|---|---|----|----|----|----|---|
| 4  | 0 | 0 | 0  | 0  | 0  | 0  | 0 |
| 2  | 2 | 2 | 1  | 2  | 0  | 1  |   |
| 4  | 0 | 0 | 0  | 0  | 0  | 0  |   |
| 2  | 1 | 0 | 99 | 1  | 0  | 1  |   |
| 4  | 1 | 1 | 0  | 0  | 0  | 0  |   |
| 3  | 1 | 0 | 0  | 1  | 0  | 0  |   |
| 2  | 1 | 1 | 1  | 2  | 0  | 0  |   |
| 2  | 1 | 1 | 1  | 2  | 0  | 0  |   |
| 3  | 1 | 0 | 0  | 2  | 1  | 2  |   |
| 3  | 2 | 2 | 2  | 2  | 2  | 2  |   |
| 2  | 1 | 2 | 2  | 1  | 2  | 1  |   |
| 4  | 1 | 1 | 1  | 0  | 0  | 0  |   |
| 3  | 1 | 1 | 1  | 2  | 1  | 0  |   |
| 3  | 0 | 0 | 0  | 1  | 0  | 0  |   |
| 2  | 2 | 1 | 2  | 2  | 2  | 2  |   |
| 99 | 1 | 1 | 1  | 1  | 1  | 1  |   |
| 4  | 1 | 0 | 0  | 1  | 0  | 0  |   |
| 3  | 0 | 0 | 0  | 0  | 0  | 0  |   |
| 4  | 0 | 0 | 0  | 1  | 0  | 0  |   |
| 1  | 0 | 0 | 0  | 1  | 0  | 0  |   |
| 1  | 0 | 0 | 0  | 1  | 0  | 0  |   |
| 4  | 1 | 0 | 0  | 1  | 0  | 0  |   |
| 99 | 2 | 1 | 2  | 2  | 2  | 99 |   |
| 4  | 0 | 0 | 0  | 0  | 0  | 0  |   |
| 99 | 0 | 0 | 0  | 1  | 0  | 0  |   |
| 4  | 0 | 1 | 0  | 2  | 0  | 0  |   |
| 3  | 0 | 0 | 0  | 1  | 0  | 0  |   |
| 4  | 0 | 0 | 0  | 1  | 0  | 0  |   |
| 3  | 1 | 0 | 1  | 2  | 0  | 0  |   |
| 4  | 0 | 0 | 0  | 0  | 0  | 1  |   |
| 2  | 1 | 1 | 1  | 1  | 1  | 1  |   |
| 2  | 1 | 1 | 0  | 2  | 1  | 1  |   |
| 3  | 1 | 0 | 0  | 1  | 0  | 0  |   |
| 4  | 0 | 0 | 0  | 0  | 0  | 0  |   |
| 4  | 1 | 1 | 0  | 2  | 1  | 1  |   |
| 3  | 1 | 1 | 2  | 2  | 1  | 0  |   |
| 2  | 0 | 0 | 0  | 0  | 0  | 0  |   |
| 3  | 1 | 1 | 0  | 2  | 0  | 2  |   |
| 3  | 1 | 0 | 0  | 1  | 0  | 0  |   |
| 3  | 0 | 0 | 0  | 0  | 0  | 0  |   |
| 2  | 0 | 0 | 0  | 1  | 0  | 0  |   |
| 99 | 0 | 0 | 99 | 99 | 99 | 99 |   |
| 4  | 1 | 0 | 1  | 2  | 1  | 0  |   |
| 3  | 1 | 1 | 2  | 2  | 0  | 1  |   |
| 3  | 0 | 0 | 0  | 0  | 0  | 0  |   |
| 2  | 1 | 1 | 0  | 2  | 1  | 2  |   |
| 4  | 1 | 0 | 1  | 1  | 0  | 1  |   |
| 3  | 0 | 1 | 99 | 99 | 0  | 0  |   |

|    |   |   |    |   |   |   |
|----|---|---|----|---|---|---|
| 4  | 0 | 0 | 0  | 1 | 0 | 0 |
| 3  | 1 | 2 | 0  | 2 | 0 | 1 |
| 4  | 2 | 1 | 2  | 2 | 1 | 1 |
| 4  | 0 | 0 | 0  | 0 | 0 | 0 |
| 4  | 0 | 0 | 0  | 0 | 0 | 0 |
| 3  | 2 | 1 | 2  | 1 | 2 | 0 |
| 3  | 0 | 0 | 0  | 0 | 0 | 0 |
| 3  | 0 | 0 | 0  | 1 | 0 | 0 |
| 4  | 0 | 0 | 0  | 0 | 0 | 1 |
| 4  | 2 | 2 | 2  | 2 | 2 | 2 |
| 4  | 0 | 0 | 0  | 0 | 0 | 0 |
| 4  | 0 | 0 | 0  | 0 | 0 | 0 |
| 4  | 0 | 0 | 0  | 2 | 0 | 1 |
| 1  | 0 | 0 | 0  | 0 | 0 | 0 |
| 4  | 1 | 1 | 2  | 1 | 1 | 0 |
| 3  | 0 | 0 | 0  | 0 | 0 | 0 |
| 4  | 1 | 2 | 1  | 2 | 0 | 0 |
| 3  | 1 | 0 | 1  | 1 | 0 | 0 |
| 99 | 0 | 1 | 0  | 1 | 0 | 0 |
| 4  | 0 | 0 | 0  | 0 | 0 | 0 |
| 1  | 1 | 1 | 1  | 2 | 1 | 2 |
| 2  | 0 | 0 | 1  | 1 | 0 | 0 |
| 3  | 0 | 0 | 0  | 1 | 0 | 1 |
| 99 | 1 | 1 | 1  | 1 | 0 | 0 |
| 3  | 0 | 0 | 0  | 0 | 0 | 0 |
| 2  | 1 | 1 | 1  | 2 | 1 | 0 |
| 4  | 0 | 0 | 0  | 0 | 0 | 0 |
| 3  | 1 | 1 | 1  | 2 | 1 | 2 |
| 3  | 1 | 0 | 1  | 2 | 0 | 1 |
| 3  | 1 | 0 | 0  | 1 | 0 | 0 |
| 4  | 0 | 0 | 0  | 2 | 0 | 0 |
| 3  | 1 | 1 | 0  | 0 | 0 | 0 |
| 4  | 0 | 0 | 0  | 0 | 0 | 0 |
| 1  | 0 | 1 | 0  | 0 | 0 | 0 |
| 3  | 1 | 1 | 2  | 1 | 2 | 2 |
| 4  | 1 | 1 | 1  | 2 | 0 | 0 |
| 4  | 0 | 0 | 99 | 2 | 0 | 0 |
| 3  | 1 | 0 | 0  | 0 | 0 | 0 |
| 2  | 1 | 1 | 1  | 2 | 1 | 1 |
| 3  | 0 | 0 | 0  | 1 | 0 | 1 |
| 1  | 1 | 1 | 1  | 2 | 2 | 0 |
| 4  | 2 | 2 | 1  | 1 | 1 | 1 |
| 4  | 0 | 0 | 0  | 1 | 0 | 0 |
| 3  | 1 | 0 | 1  | 0 | 0 | 0 |
| 3  | 1 | 2 | 1  | 1 | 1 | 2 |
| 1  | 0 | 0 | 99 | 2 | 2 | 0 |
| 3  | 1 | 1 | 2  | 2 | 1 | 0 |
| 3  | 1 | 1 | 1  | 1 | 1 | 1 |



|        |   |   |   |   |   |   |
|--------|---|---|---|---|---|---|
| 2      | 1 | 0 | 0 | 1 | 0 | 0 |
| 1      | 1 | 0 | 0 | 1 | 0 | 0 |
| 4      | 1 | 1 | 1 | 1 | 1 | 1 |
| #NULL! | 0 | 0 | 0 | 0 | 0 | 0 |
| #NULL! | 2 | 1 | 2 | 1 | 0 | 2 |
| #NULL! | 0 | 1 | 0 | 1 | 0 | 0 |
| #NULL! | 0 | 0 | 0 | 0 | 0 | 0 |
| #NULL! | 1 | 0 | 0 | 0 | 0 | 0 |
| #NULL! | 1 | 0 | 0 | 2 | 0 | 0 |
| #NULL! | 1 | 0 | 0 | 2 | 0 | 0 |
| #NULL! | 1 | 0 | 1 | 1 | 1 | 0 |
| #NULL! | 2 | 1 | 1 | 2 | 1 | 1 |
| #NULL! | 2 | 2 | 1 | 2 | 1 | 1 |
| #NULL! | 1 | 1 | 1 | 1 | 0 | 1 |
| #NULL! | 1 | 1 | 1 | 2 | 1 | 0 |
| #NULL! | 1 | 0 | 1 | 2 | 1 | 0 |
| #NULL! | 0 | 0 | 1 | 1 | 0 | 0 |
| #NULL! | 1 | 0 | 1 | 2 | 1 | 0 |
| #NULL! | 1 | 1 | 1 | 0 | 0 | 0 |
| #NULL! | 2 | 1 | 2 | 2 | 0 | 0 |
| #NULL! | 2 | 1 | 2 | 2 | 0 | 0 |
| #NULL! | 2 | 1 | 2 | 2 | 1 | 1 |
| #NULL! | 1 | 1 | 2 | 2 | 1 | 1 |
| #NULL! | 0 | 0 | 0 | 0 | 0 | 0 |
| #NULL! | 0 | 0 | 0 | 2 | 0 | 0 |
| #NULL! | 1 | 1 | 1 | 1 | 1 | 1 |
| #NULL! | 1 | 1 | 1 | 1 | 1 | 0 |
| #NULL! | 0 | 0 | 0 | 1 | 0 | 0 |
| #NULL! | 1 | 0 | 0 | 2 | 0 | 0 |
| #NULL! | 1 | 0 | 0 | 0 | 0 | 0 |
| #NULL! | 0 | 0 | 0 | 0 | 0 | 0 |
| #NULL! | 1 | 2 | 2 | 2 | 2 | 2 |
| #NULL! | 2 | 2 | 2 | 2 | 0 | 0 |
| #NULL! | 1 | 1 | 0 | 1 | 0 | 0 |
| #NULL! | 1 | 0 | 1 | 2 | 0 | 0 |
| #NULL! | 2 | 1 | 2 | 2 | 0 | 0 |
| #NULL! | 0 | 0 | 0 | 0 | 0 | 0 |
| #NULL! | 1 | 0 | 0 | 0 | 0 | 0 |
| #NULL! | 2 | 1 | 0 | 2 | 0 | 0 |
| #NULL! | 0 | 0 | 0 | 0 | 0 | 0 |
| #NULL! | 0 | 0 | 0 | 0 | 0 | 0 |
| #NULL! | 0 | 0 | 0 | 1 | 0 | 0 |
| #NULL! | 1 | 1 | 0 | 2 | 0 | 0 |
| #NULL! | 0 | 0 | 0 | 1 | 0 | 0 |
| #NULL! | 0 | 0 | 0 | 0 | 0 | 0 |
| #NULL! | 1 | 1 | 1 | 1 | 1 | 1 |
| #NULL! | 0 | 0 | 0 | 1 | 0 | 0 |
| #NULL! | 0 | 0 | 0 | 2 | 0 | 0 |

|        |        |        |        |        |        |        |        |
|--------|--------|--------|--------|--------|--------|--------|--------|
| #NULL! | 0      | 0      | 0      | 0      | 0      | 0      | 0      |
| #NULL! | 1      | 1      | 0      | 1      | 0      | 0      | 0      |
| #NULL! | 0      | 0      | 0      | 1      | 0      | 0      | 0      |
| #NULL! | 0      | 0      | 0      | 1      | 0      | 0      | 0      |
| #NULL! | 0      | 0      | 0      | 2      | 0      | 0      | 0      |
| #NULL! | 0      | 0      | 0      | 0      | 0      | 0      | 0      |
| #NULL! | 1      | 1      | 0      | 2      | 0      | 0      | 1      |
| #NULL! | 0      | 0      | 0      | 0      | 0      | 0      | 0      |
| #NULL! | 0      | 0      | 0      | 1      | 0      | 0      | 0      |
| #NULL! | 1      | 1      | 1      | 1      | 0      | 0      | 1      |
| #NULL! | 0      | 0      | 0      | 1      | 0      | 0      | 0      |
| #NULL! | 0      | 0      | 0      | 0      | 0      | 0      | 0      |
| #NULL! | #NULL! | #NULL! | #NULL! | #NULL! | #NULL! | #NULL! | #NULL! |
| #NULL! | 1      | 0      | 0      | 1      | 0      | 0      | 1      |
| #NULL! | 0      | 0      | 0      | 2      | 0      | 0      | 0      |
| #NULL! | 0      | 0      | 0      | 0      | 0      | 0      | 0      |
| #NULL! | 0      | 0      | 0      | 2      | 0      | 0      | 0      |
| #NULL! | 0      | 0      | 0      | 0      | 1      | 0      | 0      |
| #NULL! | 1      | 0      | 0      | 1      | 0      | 0      | 0      |
| #NULL! | 1      | 0      | 0      | 1      | 0      | 0      | 0      |
| #NULL! | 0      | 0      | 0      | 0      | 0      | 0      | 0      |
| #NULL! | 2      | 2      | 1      | 2      | 1      | 1      | 1      |
| #NULL! | 0      | 0      | 0      | 0      | 0      | 0      | 0      |
| #NULL! | 0      | 0      | 0      | 0      | 0      | 0      | 0      |
| #NULL! | 1      | 1      | 1      | 1      | 0      | 0      | 1      |
| #NULL! | 0      | 0      | 0      | 1      | 0      | 0      | 0      |
| #NULL! | 1      | 0      | 0      | 2      | 1      | 1      | 1      |
| #NULL! | 0      | 0      | 0      | 0      | 0      | 0      | 0      |
| #NULL! | 0      | 0      | 0      | 1      | 0      | 0      | 0      |
| #NULL! | 0      | 0      | 0      | 0      | 0      | 0      | 0      |
| #NULL! | 0      | 0      | 0      | 0      | 0      | 0      | 0      |
| #NULL! | 0      | 0      | 0      | 2      | 0      | 0      | 0      |
| #NULL! | 1      | 0      | 0      | 1      | 0      | 0      | 1      |
| #NULL! | 0      | 0      | 0      | 0      | 0      | 0      | 0      |
| #NULL! | 1      | 0      | 0      | 1      | 0      | 0      | 0      |
| #NULL! | 0      | 0      | 0      | 1      | 0      | 0      | 0      |
| #NULL! | 0      | 0      | 0      | 0      | 0      | 0      | 0      |
| #NULL! | 0      | 0      | 0      | 1      | 0      | 0      | 0      |
| #NULL! | 0      | 0      | 0      | 1      | 0      | 0      | 0      |
| #NULL! | 0      | 0      | 0      | 1      | 0      | 0      | 0      |
| #NULL! | 1      | 0      | 0      | 1      | 0      | 0      | 0      |
| #NULL! | 0      | 0      | 0      | 0      | 0      | 0      | 0      |
| #NULL! | 1      | 0      | 0      | 1      | 0      | 0      | 0      |
| #NULL! | 0      | 0      | 0      | 0      | 0      | 0      | 0      |
| #NULL! | 0      | 0      | 0      | 2      | 0      | 0      | 0      |
| #NULL! | 1      | 1      | 1      | 1      | 0      | 0      | 1      |
| #NULL! | 1      | 0      | 1      | 2      | 0      | 0      | 0      |
| #NULL! | 0      | 0      | 1      | 0      | 0      | 0      | 0      |

|        |        |        |        |        |        |        |
|--------|--------|--------|--------|--------|--------|--------|
| #NULL! | 0      | 0      | 2      | 2      | 0      | 0      |
| #NULL! | 1      | 0      | 0      | 1      | 0      | 0      |
| #NULL! | 0      | 1      | 1      | 2      | 0      | 0      |
| #NULL! | 0      | 0      | 0      | 0      | 0      | 0      |
| #NULL! | 1      | 0      | 1      | 2      | 0      | 0      |
| #NULL! | 1      | 0      | 1      | 2      | 0      | 0      |
| #NULL! | 0      | 0      | 0      | 2      | 0      | 0      |
| #NULL! | 0      | 0      | 0      | 2      | 0      | 0      |
| #NULL! | 0      | 0      | 0      | 1      | 0      | 0      |
| #NULL! | 1      | 0      | 1      | 2      | 1      | 2      |
| #NULL! | 0      | 0      | 0      | 2      | 0      | 0      |
| #NULL! | 0      | 0      | 0      | 1      | 0      | 0      |
| #NULL! | 1      | 0      | 0      | 1      | 0      | 0      |
| #NULL! | 1      | 1      | 0      | 1      | 1      | 2      |
| #NULL! | 1      | 1      | 0      | 2      | 0      | 0      |
| #NULL! | 0      | 0      | 0      | 1      | 0      | 0      |
| #NULL! | #NULL! | #NULL! | #NULL! | #NULL! | #NULL! | #NULL! |
| #NULL! | 2      | 2      | 2      | 2      | 2      | 2      |
| #NULL! | 1      | 1      | 1      | 2      | 0      | 1      |
| #NULL! | 1      | 0      | 0      | 1      | 0      | 0      |
| #NULL! | 0      | 0      | 0      | 0      | 0      | 0      |

| pccommg_pre | pccommh_pre | pccommi_pre | pccommj_pre | pccommk_pre | bullya_pre | bullyb_pre |
|-------------|-------------|-------------|-------------|-------------|------------|------------|
| 0           | 0           | 0           | 0           | 0           | 0          | 0          |
| 0           | 0           | 0           | 0           | 0           | 0          | 0          |
| 0           | 0           | 0           | 0           | 0           | 0          | 1          |
| 1           | 0           | 0           | 0           | 0           | 1          | 4          |
| 0           | 0           | 0           | 0           | 0           | 2          | 0          |
| 99          | 99          | 99          | 99          | 99          | 99         | 99         |
| 1           | 2           | 2           | 2           | 2           | 2          | 0          |
| 0           | 0           | 1           | 0           | 0           | 0          | 1          |
| 99          | 99          | 99          | 99          | 99          | 99         | 99         |
| 0           | 0           | 2           | 1           | 1           | 1          | 0          |
| 0           | 0           | 0           | 0           | 0           | 2          | 0          |
| 0           | 0           | 1           | 0           | 2           | 2          | 0          |
| 0           | 0           | 0           | 0           | 1           | 2          | 2          |
| 0           | 0           | 0           | 0           | 0           | 0          | 2          |
| 0           | 0           | 0           | 0           | 0           | 2          | 99         |
| 0           | 0           | 0           | 0           | 0           | 0          | 0          |
| 0           | 1           | 1           | 1           | 2           | 1          | 1          |
| 0           | 0           | 0           | 0           | 0           | 0          | 0          |
| 0           | 0           | 0           | 0           | 0           | 0          | 1          |
| 2           | 0           | 2           | 2           | 2           | 1          | 99         |
| 0           | 1           | 2           | 1           | 2           | 4          | 3          |
| 99          | 99          | 99          | 99          | 99          | 99         | 99         |
| 0           | 0           | 0           | 0           | 0           | 0          | 0          |
| 0           | 0           | 0           | 0           | 0           | 0          | 0          |
| 1           | 0           | 1           | 0           | 2           | 0          | 0          |
| 0           | 0           | 1           | 0           | 2           | 0          | 0          |
| 0           | 0           | 0           | 0           | 0           | 0          | 1          |
| 0           | 0           | 0           | 0           | 0           | 0          | 1          |
| 0           | 0           | 0           | 0           | 0           | 1          | 2          |
| 0           | 0           | 1           | 0           | 0           | 0          | 0          |
| 99          | 0           | 0           | 0           | 0           | 2          | 1          |
| 0           | 0           | 0           | 1           | 0           | 1          | 3          |
| 1           | 1           | 1           | 0           | 2           | 2          | 0          |
| 0           | 0           | 0           | 0           | 0           | 2          | 1          |
| 0           | 0           | 0           | 0           | 0           | 0          | 0          |
| 99          | 0           | 0           | 0           | 0           | 99         | 1          |
| 1           | 0           | 1           | 1           | 2           | 4          | 4          |
| 0           | 0           | 0           | 0           | 1           | 1          | 1          |
| 0           | 0           | 0           | 0           | 0           | 2          | 2          |
| 0           | 0           | 1           | 0           | 2           | 4          | 4          |
| 0           | 1           | 1           | 1           | 2           | 3          | 3          |
| 0           | 0           | 0           | 0           | 1           | 3          | 3          |
| 0           | 0           | 0           | 0           | 0           | 0          | 0          |
| 1           | 0           | 1           | 1           | 0           | 99         | 99         |
| 0           | 0           | 0           | 0           | 0           | 1          | 0          |
| 0           | 0           | 2           | 1           | 2           | 0          | 0          |
| 0           | 0           | 1           | 1           | 2           | 0          | 3          |
| 0           | 0           | 0           | 0           | 0           | 2          | 0          |

|    |   |   |   |   |   |   |
|----|---|---|---|---|---|---|
| 0  | 0 | 0 | 1 | 2 | 0 | 0 |
| 0  | 0 | 1 | 1 | 1 | 2 | 0 |
| 0  | 0 | 2 | 2 | 2 | 0 | 0 |
| 1  | 0 | 1 | 1 | 1 | 3 | 3 |
| 0  | 0 | 1 | 1 | 0 | 2 | 2 |
| 0  | 0 | 1 | 1 | 1 | 1 | 0 |
| 0  | 0 | 0 | 0 | 1 | 0 | 0 |
| 0  | 1 | 0 | 0 | 1 | 1 | 0 |
| 0  | 0 | 0 | 0 | 0 | 0 | 0 |
| 0  | 0 | 1 | 0 | 0 | 0 | 1 |
| 0  | 0 | 0 | 0 | 0 | 1 | 0 |
| 0  | 0 | 0 | 0 | 1 | 0 | 0 |
| 0  | 0 | 0 | 0 | 0 | 1 | 1 |
| 1  | 0 | 2 | 1 | 2 | 2 | 2 |
| 0  | 0 | 0 | 0 | 0 | 1 | 0 |
| 0  | 1 | 2 | 0 | 2 | 1 | 4 |
| 2  | 1 | 1 | 1 | 2 | 4 | 2 |
| 0  | 0 | 2 | 1 | 2 | 1 | 0 |
| 0  | 0 | 1 | 0 | 0 | 4 | 3 |
| 0  | 0 | 1 | 0 | 0 | 2 | 1 |
| 1  | 0 | 2 | 0 | 1 | 1 | 1 |
| 0  | 0 | 2 | 2 | 2 | 2 | 0 |
| 0  | 0 | 0 | 0 | 1 | 4 | 4 |
| 0  | 0 | 2 | 0 | 0 | 4 | 4 |
| 1  | 0 | 1 | 1 | 2 | 1 | 0 |
| 0  | 0 | 0 | 0 | 0 | 0 | 0 |
| 0  | 0 | 0 | 0 | 0 | 2 | 1 |
| 2  | 2 | 2 | 2 | 2 | 0 | 0 |
| 0  | 0 | 0 | 0 | 1 | 1 | 1 |
| 0  | 0 | 1 | 0 | 2 | 1 | 0 |
| 0  | 0 | 2 | 0 | 0 | 4 | 0 |
| 0  | 0 | 1 | 0 | 2 | 2 | 3 |
| 99 | 0 | 2 | 2 | 1 | 2 | 0 |
| 0  | 0 | 2 | 2 | 2 | 3 | 2 |
| 0  | 0 | 1 | 0 | 2 | 4 | 2 |
| 0  | 0 | 0 | 0 | 0 | 1 | 0 |
| 0  | 0 | 0 | 0 | 0 | 2 | 4 |
| 0  | 1 | 1 | 1 | 2 | 3 | 0 |
| 0  | 1 | 2 | 2 | 1 | 3 | 2 |
| 2  | 0 | 2 | 0 | 2 | 2 | 0 |
| 1  | 0 | 1 | 2 | 1 | 2 | 0 |
| 0  | 0 | 0 | 0 | 0 | 1 | 0 |
| 0  | 0 | 1 | 1 | 1 | 2 | 2 |
| 0  | 0 | 0 | 0 | 0 | 0 | 0 |
| 1  | 1 | 1 | 1 | 2 | 0 | 0 |
| 0  | 0 | 0 | 0 | 0 | 0 | 0 |
| 0  | 0 | 0 | 0 | 0 | 1 | 1 |
| 1  | 0 | 1 | 0 | 0 | 3 | 0 |

|    |    |    |    |    |    |    |
|----|----|----|----|----|----|----|
| 0  | 0  | 1  | 1  | 1  | 2  | 0  |
| 0  | 0  | 1  | 1  | 0  | 2  | 2  |
| 0  | 1  | 1  | 1  | 1  | 0  | 0  |
| 0  | 0  | 1  | 1  | 2  | 2  | 0  |
| 0  | 0  | 2  | 2  | 1  | 0  | 0  |
| 0  | 0  | 1  | 0  | 1  | 0  | 0  |
| 2  | 0  | 1  | 1  | 2  | 2  | 3  |
| 0  | 0  | 2  | 0  | 0  | 1  | 0  |
| 0  | 0  | 1  | 0  | 0  | 4  | 3  |
| 2  | 2  | 2  | 2  | 2  | 4  | 4  |
| 0  | 0  | 0  | 1  | 1  | 1  | 1  |
| 0  | 0  | 0  | 0  | 0  | 1  | 0  |
| 2  | 0  | 2  | 2  | 2  | 4  | 1  |
| 0  | 0  | 2  | 1  | 2  | 2  | 2  |
| 0  | 0  | 0  | 2  | 2  | 0  | 0  |
| 2  | 0  | 0  | 0  | 2  | 1  | 4  |
| 2  | 1  | 2  | 2  | 2  | 2  | 2  |
| 0  | 0  | 1  | 0  | 2  | 0  | 2  |
| 1  | 1  | 1  | 1  | 2  | 0  | 0  |
| 0  | 0  | 1  | 0  | 0  | 0  | 0  |
| 0  | 0  | 2  | 2  | 2  | 4  | 1  |
| 1  | 1  | 1  | 2  | 2  | 1  | 3  |
| 0  | 0  | 0  | 0  | 0  | 0  | 0  |
| 2  | 0  | 0  | 0  | 1  | 4  | 4  |
| 2  | 2  | 2  | 2  | 2  | 1  | 0  |
| 1  | 1  | 1  | 1  | 1  | 4  | 0  |
| 99 | 1  | 1  | 1  | 1  | 3  | 4  |
| 0  | 0  | 1  | 0  | 0  | 1  | 0  |
| 0  | 0  | 0  | 0  | 2  | 0  | 0  |
| 0  | 0  | 1  | 1  | 1  | 1  | 0  |
| 0  | 0  | 0  | 0  | 1  | 99 | 99 |
| 0  | 0  | 1  | 0  | 0  | 4  | 2  |
| 99 | 99 | 99 | 99 | 99 | 99 | 99 |
| 1  | 0  | 1  | 1  | 99 | 99 | 0  |
| 1  | 1  | 1  | 1  | 1  | 0  | 0  |
| 0  | 0  | 0  | 0  | 2  | 1  | 3  |
| 0  | 0  | 0  | 0  | 0  | 0  | 0  |
| 1  | 1  | 1  | 1  | 2  | 3  | 0  |
| 0  | 0  | 1  | 1  | 2  | 2  | 2  |
| 0  | 0  | 0  | 0  | 0  | 4  | 3  |
| 0  | 0  | 0  | 0  | 2  | 0  | 1  |
| 2  | 2  | 2  | 2  | 2  | 3  | 0  |
| 0  | 0  | 0  | 2  | 2  | 2  | 4  |
| 0  | 0  | 0  | 0  | 0  | 1  | 2  |
| 0  | 0  | 1  | 0  | 1  | 0  | 1  |
| 0  | 0  | 0  | 0  | 0  | 99 | 99 |
| 0  | 0  | 1  | 1  | 2  | 4  | 4  |
| 0  | 0  | 1  | 1  | 2  | 3  | 4  |

|    |    |    |    |    |    |    |
|----|----|----|----|----|----|----|
| 0  | 0  | 1  | 0  | 1  | 1  | 0  |
| 2  | 2  | 1  | 1  | 2  | 0  | 0  |
| 0  | 0  | 1  | 0  | 2  | 1  | 0  |
| 1  | 1  | 1  | 1  | 2  | 2  | 1  |
| 0  | 0  | 0  | 1  | 1  | 0  | 0  |
| 99 | 99 | 99 | 99 | 99 | 99 | 99 |
| 0  | 0  | 0  | 0  | 0  | 0  | 0  |
| 0  | 0  | 0  | 0  | 0  | 1  | 0  |
| 0  | 0  | 0  | 0  | 0  | 3  | 0  |
| 0  | 0  | 0  | 0  | 1  | 4  | 2  |
| 0  | 0  | 1  | 0  | 1  | 1  | 1  |
| 0  | 0  | 0  | 0  | 0  | 0  | 0  |
| 0  | 0  | 0  | 0  | 0  | 1  | 0  |
| 0  | 0  | 0  | 0  | 0  | 2  | 2  |
| 0  | 0  | 1  | 1  | 1  | 2  | 0  |
| 0  | 1  | 2  | 1  | 1  | 2  | 0  |
| 0  | 0  | 1  | 0  | 0  | 1  | 0  |
| 0  | 0  | 1  | 1  | 0  | 1  | 0  |
| 0  | 0  | 2  | 0  | 2  | 4  | 2  |
| 1  | 0  | 0  | 0  | 0  | 0  | 0  |
| 0  | 0  | 0  | 0  | 0  | 2  | 0  |
| 0  | 0  | 0  | 0  | 0  | 0  | 0  |
| 1  | 1  | 1  | 1  | 1  | 0  | 0  |
| 0  | 0  | 1  | 0  | 1  | 1  | 0  |
| 0  | 0  | 0  | 0  | 1  | 0  | 0  |
| 0  | 0  | 0  | 0  | 1  | 1  | 0  |
| 0  | 0  | 0  | 0  | 1  | 3  | 2  |
| 0  | 99 | 99 | 0  | 0  | 4  | 0  |
| 0  | 0  | 0  | 0  | 0  | 2  | 1  |
| 0  | 0  | 1  | 0  | 0  | 0  | 0  |
| 0  | 0  | 0  | 0  | 0  | 1  | 0  |
| 0  | 0  | 0  | 0  | 99 | 0  | 1  |
| 0  | 0  | 0  | 0  | 0  | 0  | 0  |
| 0  | 0  | 0  | 0  | 0  | 0  | 0  |
| 0  | 0  | 1  | 0  | 0  | 2  | 3  |
| 0  | 0  | 1  | 1  | 1  | 2  | 1  |
| 0  | 0  | 0  | 0  | 0  | 0  | 0  |
| 0  | 0  | 0  | 0  | 0  | 1  | 0  |
| 0  | 0  | 0  | 0  | 0  | 4  | 0  |
| 0  | 0  | 1  | 1  | 0  | 1  | 0  |
| 0  | 0  | 1  | 1  | 1  | 0  | 1  |
| 0  | 0  | 0  | 1  | 0  | 2  | 2  |
| 0  | 1  | 2  | 1  | 2  | 4  | 4  |
| 1  | 0  | 0  | 0  | 2  | 4  | 3  |
| 0  | 0  | 1  | 0  | 0  | 1  | 2  |
| 1  | 1  | 2  | 1  | 2  | 0  | 0  |
| 0  | 1  | 1  | 1  | 1  | 1  | 1  |
| 0  | 0  | 1  | 0  | 1  | 0  | 0  |

|    |    |    |    |    |    |    |
|----|----|----|----|----|----|----|
| 0  | 0  | 0  | 0  | 0  | 2  | 3  |
| 0  | 0  | 1  | 0  | 0  | 0  | 1  |
| 0  | 0  | 0  | 0  | 0  | 4  | 4  |
| 0  | 0  | 0  | 0  | 1  | 0  | 0  |
| 0  | 0  | 0  | 0  | 2  | 3  | 0  |
| 0  | 0  | 0  | 0  | 0  | 2  | 0  |
| 0  | 0  | 0  | 0  | 0  | 2  | 2  |
| 0  | 2  | 2  | 2  | 2  | 3  | 0  |
| 0  | 0  | 0  | 0  | 0  | 0  | 0  |
| 0  | 0  | 1  | 1  | 2  | 4  | 3  |
| 0  | 0  | 0  | 0  | 0  | 1  | 1  |
| 0  | 0  | 1  | 1  | 0  | 2  | 0  |
| 0  | 2  | 1  | 0  | 2  | 3  | 2  |
| 99 | 99 | 99 | 99 | 99 | 99 | 99 |
| 1  | 1  | 1  | 1  | 1  | 1  | 0  |
| 2  | 2  | 2  | 2  | 1  | 2  | 2  |
| 1  | 0  | 1  | 0  | 0  | 0  | 0  |
| 0  | 0  | 0  | 0  | 0  | 0  | 0  |
| 1  | 0  | 2  | 1  | 1  | 2  | 2  |
| 1  | 0  | 0  | 0  | 1  | 0  | 0  |
| 0  | 0  | 0  | 0  | 0  | 0  | 0  |
| 0  | 0  | 0  | 0  | 0  | 0  | 0  |
| 0  | 2  | 1  | 2  | 0  | 0  | 0  |
| 0  | 0  | 0  | 0  | 0  | 0  | 0  |
| 0  | 0  | 1  | 0  | 1  | 4  | 4  |
| 0  | 0  | 2  | 2  | 0  | 3  | 4  |
| 0  | 0  | 0  | 0  | 0  | 3  | 4  |
| 0  | 0  | 1  | 0  | 2  | 4  | 0  |
| 0  | 0  | 1  | 0  | 2  | 4  | 4  |
| 0  | 0  | 0  | 0  | 0  | 0  | 0  |
| 2  | 0  | 2  | 2  | 2  | 2  | 0  |
| 1  | 0  | 1  | 1  | 1  | 4  | 0  |
| 2  | 2  | 2  | 2  | 2  | 2  | 0  |
| 2  | 0  | 1  | 0  | 2  | 0  | 0  |
| 2  | 1  | 1  | 2  | 2  | 3  | 2  |
| 2  | 0  | 2  | 0  | 0  | 4  | 4  |
| 0  | 0  | 0  | 0  | 0  | 0  | 1  |
| 0  | 0  | 0  | 0  | 0  | 2  | 0  |
| 0  | 0  | 0  | 0  | 0  | 0  | 0  |
| 2  | 1  | 2  | 1  | 2  | 2  | 1  |
| 0  | 0  | 0  | 0  | 0  | 2  | 2  |
| 0  | 0  | 0  | 0  | 0  | 1  | 0  |
| 1  | 1  | 1  | 1  | 1  | 1  | 0  |
| 0  | 0  | 1  | 0  | 0  | 1  | 0  |
| 0  | 0  | 0  | 0  | 0  | 1  | 1  |
| 0  | 0  | 2  | 0  | 0  | 2  | 0  |
| 0  | 0  | 0  | 0  | 0  | 0  | 0  |
| 0  | 0  | 0  | 0  | 0  | 3  | 0  |



|   |   |   |    |   |   |   |
|---|---|---|----|---|---|---|
| 0 | 0 | 0 | 0  | 1 | 2 | 1 |
| 1 | 1 | 1 | 1  | 2 | 4 | 4 |
| 0 | 0 | 0 | 0  | 0 | 4 | 1 |
| 0 | 0 | 0 | 0  | 0 | 0 | 0 |
| 0 | 0 | 2 | 1  | 1 | 3 | 3 |
| 0 | 0 | 0 | 0  | 1 | 0 | 0 |
| 1 | 0 | 1 | 0  | 0 | 4 | 4 |
| 0 | 0 | 1 | 99 | 0 | 4 | 2 |
| 0 | 1 | 1 | 2  | 2 | 1 | 1 |
| 0 | 0 | 0 | 1  | 0 | 1 | 1 |
| 0 | 0 | 0 | 0  | 0 | 0 | 0 |
| 0 | 0 | 0 | 0  | 1 | 3 | 0 |
| 0 | 1 | 0 | 1  | 2 | 0 | 1 |
| 0 | 0 | 0 | 0  | 0 | 1 | 0 |
| 1 | 0 | 2 | 1  | 2 | 1 | 2 |
| 0 | 0 | 0 | 0  | 1 | 4 | 4 |
| 0 | 0 | 0 | 0  | 0 | 1 | 1 |
| 0 | 1 | 1 | 1  | 2 | 4 | 4 |
| 1 | 0 | 1 | 1  | 0 | 0 | 0 |
| 0 | 0 | 0 | 1  | 2 | 1 | 1 |
| 1 | 0 | 0 | 0  | 2 | 4 | 4 |
| 0 | 0 | 0 | 0  | 1 | 1 | 0 |
| 0 | 0 | 0 | 0  | 0 | 2 | 1 |
| 0 | 0 | 0 | 0  | 0 | 4 | 3 |
| 0 | 0 | 1 | 0  | 1 | 2 | 0 |
| 0 | 0 | 0 | 0  | 0 | 1 | 0 |
| 0 | 1 | 1 | 0  | 0 | 1 | 1 |
| 2 | 1 | 1 | 1  | 2 | 2 | 1 |
| 0 | 0 | 0 | 0  | 0 | 2 | 0 |
| 0 | 0 | 2 | 0  | 2 | 2 | 1 |
| 0 | 0 | 1 | 0  | 0 | 3 | 4 |
| 0 | 0 | 1 | 1  | 1 | 2 | 0 |
| 0 | 0 | 2 | 2  | 2 | 1 | 0 |
| 0 | 0 | 0 | 0  | 2 | 0 | 0 |
| 0 | 1 | 0 | 0  | 1 | 0 | 0 |
| 0 | 0 | 0 | 1  | 0 | 2 | 1 |
| 0 | 0 | 1 | 0  | 1 | 2 | 1 |
| 1 | 2 | 2 | 2  | 2 | 1 | 4 |
| 1 | 0 | 1 | 0  | 2 | 2 | 2 |
| 0 | 0 | 0 | 0  | 0 | 0 | 0 |
| 1 | 0 | 1 | 0  | 0 | 0 | 3 |
| 0 | 0 | 0 | 0  | 0 | 0 | 0 |
| 0 | 0 | 2 | 0  | 0 | 1 | 0 |
| 1 | 0 | 0 | 0  | 2 | 4 | 0 |
| 0 | 0 | 1 | 0  | 0 | 1 | 0 |
| 2 | 0 | 2 | 1  | 2 | 2 | 0 |

|    |   |   |   |   |   |   |
|----|---|---|---|---|---|---|
| 0  | 0 | 1 | 0 | 0 | 0 | 0 |
| 0  | 0 | 1 | 0 | 0 | 2 | 1 |
| 0  | 0 | 1 | 0 | 0 | 1 | 2 |
| 0  | 0 | 0 | 0 | 0 | 1 | 0 |
| 0  | 0 | 1 | 0 | 2 | 2 | 0 |
| 0  | 0 | 0 | 0 | 0 | 1 | 0 |
| 0  | 0 | 1 | 0 | 0 | 1 | 0 |
| 0  | 0 | 0 | 0 | 0 | 2 | 0 |
| 0  | 1 | 2 | 2 | 2 | 1 | 1 |
| 0  | 1 | 1 | 2 | 2 | 2 | 4 |
| 0  | 0 | 1 | 0 | 0 | 0 | 0 |
| 0  | 0 | 0 | 0 | 0 | 0 | 0 |
| 0  | 0 | 1 | 1 | 1 | 2 | 1 |
| 1  | 0 | 1 | 0 | 1 | 1 | 2 |
| 0  | 0 | 1 | 0 | 0 | 4 | 3 |
| 1  | 0 | 1 | 0 | 1 | 0 | 0 |
| 0  | 0 | 1 | 0 | 1 | 0 | 0 |
| 0  | 0 | 2 | 2 | 1 | 3 | 1 |
| 1  | 1 | 2 | 2 | 1 | 0 | 0 |
| 1  | 0 | 2 | 2 | 2 | 3 | 3 |
| 1  | 0 | 2 | 1 | 2 | 3 | 2 |
| 0  | 0 | 2 | 0 | 2 | 3 | 2 |
| 0  | 1 | 0 | 1 | 1 | 0 | 0 |
| 1  | 1 | 2 | 1 | 1 | 0 | 0 |
| 0  | 1 | 2 | 1 | 0 | 2 | 2 |
| 0  | 0 | 0 | 0 | 0 | 0 | 0 |
| 0  | 0 | 0 | 0 | 2 | 1 | 1 |
| 0  | 0 | 1 | 1 | 1 | 4 | 4 |
| 99 | 0 | 0 | 0 | 2 | 2 | 0 |
| 0  | 0 | 0 | 0 | 0 | 1 | 1 |
| 2  | 0 | 1 | 2 | 2 | 0 | 1 |
| 0  | 0 | 0 | 0 | 0 | 2 | 1 |
| 0  | 1 | 2 | 2 | 1 | 4 | 4 |
| 0  | 0 | 0 | 0 | 0 | 0 | 0 |
| 0  | 0 | 0 | 0 | 0 | 0 | 2 |
| 0  | 0 | 0 | 0 | 1 | 4 | 0 |
| 0  | 0 | 0 | 0 | 1 | 2 | 2 |
| 0  | 0 | 0 | 0 | 0 | 0 | 0 |
| 0  | 0 | 1 | 0 | 0 | 0 | 0 |
| 0  | 0 | 0 | 0 | 0 | 2 | 2 |
| 0  | 2 | 2 | 2 | 0 | 2 | 2 |
| 0  | 0 | 0 | 0 | 2 | 1 | 0 |
| 0  | 0 | 0 | 0 | 0 | 0 | 0 |
| 0  | 0 | 0 | 1 | 2 | 4 | 1 |
| 0  | 1 | 1 | 1 | 1 | 2 | 1 |
| 0  | 0 | 1 | 1 | 2 | 2 | 2 |
| 0  | 0 | 0 | 0 | 1 | 4 | 0 |
| 0  | 0 | 0 | 0 | 0 | 0 | 0 |

|    |    |    |    |    |   |    |
|----|----|----|----|----|---|----|
| 0  | 0  | 1  | 0  | 2  | 1 | 0  |
| 0  | 0  | 1  | 1  | 1  | 2 | 1  |
| 0  | 0  | 1  | 2  | 2  | 1 | 2  |
| 1  | 0  | 1  | 1  | 1  | 2 | 0  |
| 0  | 0  | 1  | 0  | 2  | 1 | 2  |
| 0  | 0  | 0  | 0  | 0  | 0 | 99 |
| 0  | 0  | 0  | 0  | 0  | 4 | 4  |
| 0  | 0  | 2  | 2  | 1  | 0 | 1  |
| 0  | 2  | 2  | 2  | 2  | 0 | 0  |
| 0  | 0  | 2  | 2  | 2  | 4 | 0  |
| 0  | 1  | 1  | 1  | 2  | 0 | 1  |
| 0  | 0  | 1  | 1  | 0  | 0 | 0  |
| 0  | 0  | 0  | 0  | 1  | 1 | 1  |
| 2  | 0  | 0  | 2  | 2  | 4 | 2  |
| 0  | 0  | 1  | 1  | 1  | 2 | 2  |
| 0  | 2  | 2  | 2  | 2  | 1 | 1  |
| 0  | 0  | 0  | 0  | 0  | 3 | 1  |
| 1  | 1  | 1  | 1  | 1  | 2 | 1  |
| 0  | 0  | 0  | 0  | 1  | 0 | 2  |
| 0  | 0  | 1  | 0  | 0  | 0 | 0  |
| 0  | 0  | 0  | 1  | 1  | 1 | 1  |
| 0  | 0  | 1  | 0  | 0  | 1 | 3  |
| 1  | 0  | 1  | 0  | 2  | 1 | 0  |
| 1  | 0  | 1  | 1  | 0  | 1 | 1  |
| 0  | 1  | 1  | 1  | 1  | 4 | 3  |
| 0  | 0  | 1  | 0  | 1  | 2 | 1  |
| 0  | 0  | 1  | 2  | 2  | 0 | 0  |
| 99 | 99 | 99 | 99 | 99 | 0 | 0  |
| 0  | 0  | 0  | 0  | 1  | 0 | 0  |
| 0  | 0  | 1  | 1  | 1  | 0 | 0  |
| 1  | 0  | 1  | 0  | 0  | 0 | 4  |
| 0  | 0  | 1  | 1  | 0  | 1 | 0  |
| 0  | 0  | 1  | 0  | 1  | 0 | 0  |
| 0  | 0  | 0  | 0  | 1  | 1 | 1  |
| 0  | 0  | 0  | 0  | 0  | 3 | 4  |
| 1  | 0  | 0  | 0  | 1  | 0 | 1  |
| 0  | 2  | 1  | 1  | 0  | 4 | 3  |
| 0  | 1  | 2  | 0  | 2  | 0 | 0  |
| 1  | 2  | 2  | 2  | 2  | 0 | 1  |
| 1  | 0  | 0  | 0  | 2  | 1 | 2  |
| 0  | 0  | 1  | 0  | 0  | 0 | 0  |
| 0  | 0  | 0  | 0  | 0  | 0 | 3  |
| 0  | 0  | 0  | 0  | 0  | 1 | 1  |
| 1  | 0  | 1  | 0  | 2  | 2 | 1  |
| 0  | 0  | 0  | 1  | 2  | 4 | 4  |
| 0  | 0  | 0  | 0  | 0  | 0 | 0  |
| 0  | 0  | 1  | 0  | 1  | 1 | 1  |
| 0  | 0  | 0  | 0  | 0  | 0 | 0  |

|    |    |    |    |    |    |    |
|----|----|----|----|----|----|----|
| 0  | 0  | 1  | 0  | 1  | 0  | 0  |
| 0  | 0  | 0  | 0  | 0  | 0  | 0  |
| 2  | 0  | 1  | 2  | 2  | 0  | 0  |
| 0  | 0  | 1  | 0  | 1  | 4  | 2  |
| 0  | 0  | 0  | 0  | 0  | 4  | 4  |
| 2  | 0  | 2  | 0  | 2  | 0  | 0  |
| 1  | 0  | 1  | 0  | 0  | 1  | 2  |
| 0  | 1  | 1  | 1  | 2  | 4  | 4  |
| 0  | 0  | 1  | 0  | 0  | 3  | 0  |
| 0  | 0  | 1  | 0  | 0  | 4  | 4  |
| 0  | 0  | 1  | 0  | 0  | 0  | 0  |
| 0  | 2  | 2  | 2  | 2  | 2  | 2  |
| 0  | 0  | 2  | 1  | 1  | 1  | 0  |
| 0  | 0  | 2  | 0  | 0  | 0  | 0  |
| 0  | 0  | 0  | 0  | 2  | 0  | 0  |
| 0  | 0  | 0  | 0  | 1  | 4  | 2  |
| 0  | 0  | 2  | 2  | 1  | 4  | 4  |
| 0  | 0  | 0  | 0  | 1  | 2  | 2  |
| 0  | 0  | 0  | 0  | 0  | 1  | 0  |
| 0  | 0  | 1  | 0  | 0  | 2  | 1  |
| 0  | 0  | 0  | 0  | 0  | 2  | 2  |
| 0  | 1  | 0  | 0  | 1  | 4  | 2  |
| 0  | 1  | 1  | 1  | 2  | 1  | 1  |
| 0  | 0  | 0  | 99 | 1  | 1  | 0  |
| 0  | 0  | 0  | 0  | 0  | 4  | 4  |
| 0  | 99 | 2  | 2  | 2  | 1  | 1  |
| 1  | 0  | 1  | 0  | 0  | 2  | 1  |
| 1  | 1  | 0  | 1  | 1  | 0  | 0  |
| 0  | 0  | 0  | 0  | 0  | 0  | 0  |
| 0  | 0  | 0  | 0  | 0  | 1  | 0  |
| 1  | 0  | 0  | 0  | 2  | 1  | 1  |
| 1  | 1  | 1  | 1  | 1  | 1  | 1  |
| 0  | 0  | 0  | 0  | 0  | 2  | 3  |
| 0  | 0  | 1  | 0  | 1  | 3  | 2  |
| 0  | 1  | 1  | 1  | 0  | 0  | 3  |
| 1  | 0  | 1  | 1  | 2  | 0  | 0  |
| 2  | 2  | 2  | 2  | 2  | 3  | 0  |
| 0  | 0  | 1  | 1  | 1  | 4  | 4  |
| 0  | 0  | 1  | 2  | 2  | 0  | 1  |
| 0  | 0  | 0  | 0  | 0  | 0  | 0  |
| 2  | 2  | 2  | 2  | 2  | 4  | 4  |
| 0  | 0  | 0  | 0  | 0  | 4  | 4  |
| 0  | 2  | 1  | 2  | 2  | 0  | 0  |
| 99 | 99 | 99 | 99 | 99 | 99 | 99 |
| 1  | 1  | 2  | 2  | 2  | 2  | 2  |
| 0  | 0  | 2  | 1  | 2  | 4  | 2  |
| 2  | 0  | 1  | 0  | 2  | 0  | 0  |
| 0  | 2  | 1  | 0  | 2  | 4  | 2  |

|   |   |   |   |   |   |   |
|---|---|---|---|---|---|---|
| 0 | 0 | 0 | 0 | 2 | 2 | 0 |
| 0 | 0 | 1 | 0 | 2 | 3 | 2 |
| 0 | 0 | 0 | 1 | 2 | 0 | 0 |
| 0 | 0 | 0 | 0 | 0 | 2 | 0 |
| 0 | 0 | 0 | 0 | 1 | 0 | 1 |
| 0 | 0 | 0 | 0 | 2 | 3 | 1 |
| 0 | 0 | 0 | 0 | 0 | 0 | 0 |
| 1 | 0 | 1 | 1 | 1 | 3 | 2 |
| 2 | 0 | 0 | 0 | 2 | 3 | 3 |
| 1 | 1 | 1 | 1 | 1 | 0 | 0 |
| 2 | 2 | 2 | 2 | 2 | 3 | 2 |
| 1 | 1 | 1 | 1 | 1 | 2 | 1 |
| 0 | 2 | 2 | 2 | 2 | 0 | 0 |
| 2 | 2 | 2 | 2 | 2 | 2 | 1 |
| 0 | 1 | 1 | 1 | 1 | 1 | 4 |
| 0 | 0 | 1 | 2 | 2 | 2 | 1 |
| 0 | 0 | 0 | 0 | 0 | 1 | 0 |
| 0 | 0 | 0 | 0 | 0 | 1 | 0 |
| 0 | 0 | 2 | 2 | 0 | 4 | 2 |
| 1 | 1 | 1 | 1 | 1 | 2 | 1 |
| 1 | 1 | 1 | 1 | 1 | 0 | 0 |
| 2 | 1 | 1 | 0 | 1 | 2 | 2 |
| 1 | 1 | 1 | 1 | 2 | 1 | 2 |
| 0 | 0 | 1 | 1 | 1 | 0 | 0 |
| 0 | 2 | 2 | 2 | 2 | 2 | 1 |
| 0 | 0 | 0 | 0 | 1 | 3 | 2 |
| 0 | 2 | 2 | 2 | 2 | 4 | 3 |
| 0 | 0 | 0 | 0 | 0 | 3 | 3 |
| 0 | 0 | 0 | 0 | 0 | 0 | 1 |
| 1 | 0 | 1 | 0 | 2 | 2 | 2 |
| 0 | 0 | 0 | 0 | 0 | 4 | 4 |
| 1 | 0 | 2 | 2 | 2 | 3 | 0 |
| 1 | 1 | 1 | 1 | 2 | 0 | 1 |
| 2 | 1 | 2 | 2 | 2 | 2 | 3 |
| 2 | 0 | 2 | 1 | 1 | 4 | 1 |
| 0 | 0 | 0 | 0 | 2 | 0 | 0 |
| 0 | 2 | 2 | 2 | 2 | 3 | 2 |
| 0 | 0 | 0 | 2 | 1 | 0 | 1 |
| 1 | 0 | 1 | 1 | 1 | 0 | 0 |
| 0 | 0 | 2 | 1 | 2 | 3 | 0 |
| 1 | 0 | 0 | 0 | 1 | 3 | 4 |
| 0 | 0 | 1 | 1 | 0 | 1 | 0 |
| 2 | 1 | 2 | 0 | 2 | 0 | 2 |
| 0 | 2 | 2 | 2 | 0 | 2 | 1 |
| 0 | 0 | 1 | 1 | 2 | 0 | 0 |
| 0 | 0 | 0 | 0 | 0 | 0 | 0 |
| 0 | 0 | 1 | 0 | 1 | 0 | 0 |
| 0 | 0 | 2 | 0 | 2 | 2 | 4 |

|    |    |    |    |    |    |    |
|----|----|----|----|----|----|----|
| 1  | 0  | 2  | 1  | 0  | 4  | 2  |
| 0  | 0  | 1  | 0  | 2  | 2  | 1  |
| 0  | 0  | 1  | 1  | 1  | 3  | 1  |
| 0  | 0  | 0  | 0  | 0  | 1  | 0  |
| 1  | 0  | 2  | 2  | 2  | 2  | 1  |
| 2  | 0  | 0  | 1  | 99 | 2  | 4  |
| 0  | 0  | 1  | 0  | 0  | 1  | 0  |
| 0  | 0  | 2  | 1  | 2  | 2  | 1  |
| 1  | 2  | 2  | 2  | 2  | 1  | 1  |
| 0  | 0  | 0  | 0  | 0  | 0  | 0  |
| 2  | 0  | 1  | 1  | 1  | 2  | 0  |
| 2  | 2  | 2  | 2  | 2  | 0  | 0  |
| 0  | 0  | 1  | 0  | 0  | 0  | 1  |
| 0  | 0  | 0  | 0  | 2  | 1  | 2  |
| 0  | 0  | 0  | 0  | 0  | 0  | 0  |
| 0  | 0  | 0  | 0  | 0  | 0  | 0  |
| 0  | 0  | 0  | 0  | 0  | 0  | 0  |
| 0  | 0  | 0  | 0  | 0  | 0  | 0  |
| 0  | 0  | 1  | 1  | 0  | 0  | 1  |
| 0  | 0  | 2  | 1  | 0  | 0  | 0  |
| 0  | 0  | 0  | 0  | 0  | 0  | 0  |
| 0  | 0  | 0  | 0  | 1  | 0  | 99 |
| 0  | 0  | 0  | 0  | 1  | 0  | 0  |
| 0  | 0  | 1  | 1  | 1  | 3  | 0  |
| 99 | 99 | 99 | 99 | 99 | 99 | 99 |
| 0  | 0  | 1  | 0  | 2  | 3  | 4  |
| 0  | 0  | 0  | 0  | 0  | 2  | 2  |
| 2  | 0  | 2  | 0  | 0  | 2  | 2  |
| 0  | 0  | 1  | 0  | 1  | 2  | 2  |
| 0  | 0  | 0  | 0  | 1  | 1  | 0  |
| 2  | 0  | 1  | 1  | 1  | 2  | 0  |
| 0  | 0  | 1  | 0  | 0  | 1  | 0  |
| 0  | 0  | 1  | 0  | 1  | 1  | 1  |
| 0  | 0  | 1  | 1  | 1  | 1  | 0  |
| 0  | 0  | 0  | 0  | 0  | 0  | 0  |
| 0  | 0  | 2  | 2  | 2  | 1  | 0  |
| 0  | 0  | 0  | 0  | 0  | 3  | 4  |
| 0  | 0  | 0  | 0  | 0  | 2  | 4  |
| 0  | 1  | 2  | 2  | 1  | 2  | 1  |
| 0  | 1  | 1  | 2  | 1  | 1  | 0  |
| 0  | 0  | 1  | 0  | 2  | 4  | 1  |
| 0  | 0  | 0  | 0  | 0  | 0  | 0  |
| 0  | 0  | 1  | 0  | 2  | 1  | 1  |
| 0  | 0  | 1  | 1  | 2  | 0  | 1  |
| 2  | 2  | 2  | 2  | 1  | 4  | 4  |
| 0  | 0  | 2  | 0  | 2  | 2  | 0  |
| 2  | 0  | 1  | 1  | 2  | 2  | 0  |
| 0  | 0  | 0  | 0  | 0  | 0  | 0  |

|    |    |    |    |    |    |    |
|----|----|----|----|----|----|----|
| 1  | 0  | 0  | 0  | 2  | 1  | 0  |
| 0  | 0  | 2  | 0  | 0  | 4  | 2  |
| 0  | 0  | 1  | 0  | 2  | 4  | 0  |
| 0  | 1  | 2  | 2  | 1  | 3  | 2  |
| 0  | 0  | 2  | 1  | 2  | 4  | 3  |
| 1  | 0  | 1  | 0  | 0  | 0  | 0  |
| 0  | 0  | 0  | 0  | 0  | 1  | 0  |
| 0  | 0  | 0  | 0  | 2  | 0  | 0  |
| 0  | 0  | 0  | 1  | 2  | 1  | 0  |
| 0  | 0  | 0  | 0  | 1  | 2  | 2  |
| 99 | 0  | 1  | 0  | 0  | 4  | 3  |
| 0  | 0  | 0  | 0  | 2  | 0  | 0  |
| 1  | 0  | 1  | 1  | 0  | 1  | 0  |
| 0  | 0  | 0  | 0  | 1  | 1  | 0  |
| 99 | 99 | 99 | 99 | 99 | 99 | 99 |
| 0  | 0  | 0  | 0  | 2  | 1  | 0  |
| 0  | 0  | 0  | 0  | 0  | 3  | 0  |
| 1  | 0  | 1  | 0  | 1  | 1  | 1  |
| 0  | 0  | 2  | 2  | 2  | 2  | 0  |
| 1  | 1  | 1  | 2  | 2  | 2  | 2  |
| 0  | 0  | 0  | 0  | 0  | 1  | 0  |
| 0  | 0  | 1  | 0  | 0  | 2  | 0  |
| 0  | 0  | 0  | 0  | 0  | 4  | 4  |
| 1  | 2  | 0  | 0  | 2  | 4  | 3  |
| 2  | 0  | 1  | 2  | 2  | 3  | 2  |
| 0  | 0  | 0  | 0  | 0  | 99 | 99 |
| 2  | 0  | 1  | 2  | 2  | 4  | 4  |
| 1  | 0  | 1  | 1  | 2  | 2  | 2  |
| 0  | 0  | 0  | 0  | 2  | 4  | 4  |
| 0  | 0  | 1  | 2  | 0  | 0  | 0  |
| 2  | 0  | 2  | 2  | 2  | 0  | 0  |
| 0  | 0  | 0  | 0  | 2  | 0  | 0  |
| 0  | 0  | 0  | 0  | 0  | 0  | 0  |
| 2  | 0  | 2  | 2  | 1  | 1  | 0  |
| 1  | 0  | 1  | 0  | 1  | 0  | 0  |
| 0  | 0  | 0  | 0  | 0  | 0  | 0  |
| 0  | 0  | 0  | 1  | 0  | 1  | 1  |
| 0  | 0  | 1  | 2  | 1  | 2  | 3  |
| 2  | 2  | 2  | 2  | 2  | 4  | 3  |
| 1  | 1  | 2  | 2  | 2  | 1  | 0  |
| 0  | 0  | 0  | 0  | 0  | 0  | 0  |
| 0  | 0  | 2  | 1  | 2  | 4  | 2  |
| 1  | 2  | 2  | 2  | 2  | 0  | 0  |
| 1  | 0  | 1  | 0  | 1  | 2  | 1  |
| 0  | 0  | 0  | 0  | 0  | 0  | 0  |
| 0  | 0  | 0  | 0  | 0  | 0  | 0  |
| 1  | 1  | 1  | 1  | 1  | 0  | 0  |
| 0  | 0  | 1  | 0  | 0  | 0  | 0  |

|    |    |    |    |    |    |    |    |
|----|----|----|----|----|----|----|----|
| 0  | 0  | 0  | 0  | 0  | 0  | 0  | 0  |
| 0  | 0  | 1  | 1  | 0  | 2  | 0  | 0  |
| 0  | 0  | 1  | 0  | 2  | 1  | 0  | 0  |
| 0  | 0  | 1  | 1  | 2  | 4  | 3  | 0  |
| 1  | 0  | 1  | 1  | 2  | 0  | 0  | 0  |
| 2  | 0  | 1  | 2  | 1  | 2  | 2  | 2  |
| 0  | 0  | 0  | 0  | 0  | 0  | 0  | 0  |
| 0  | 0  | 0  | 1  | 1  | 0  | 0  | 0  |
| 0  | 0  | 2  | 0  | 0  | 2  | 2  | 2  |
| 0  | 0  | 1  | 1  | 0  | 2  | 1  | 1  |
| 0  | 0  | 1  | 0  | 2  | 0  | 0  | 0  |
| 0  | 0  | 0  | 0  | 0  | 0  | 0  | 1  |
| 0  | 0  | 1  | 0  | 99 | 2  | 4  | 4  |
| 0  | 0  | 0  | 2  | 0  | 1  | 4  | 4  |
| 0  | 0  | 2  | 1  | 99 | 0  | 1  | 1  |
| 0  | 0  | 1  | 0  | 99 | 2  | 2  | 2  |
| 0  | 0  | 1  | 0  | 99 | 1  | 0  | 0  |
| 1  | 0  | 1  | 0  | 99 | 1  | 0  | 0  |
| 0  | 1  | 1  | 1  | 99 | 4  | 4  | 4  |
| 0  | 0  | 1  | 0  | 99 | 2  | 0  | 0  |
| 0  | 0  | 1  | 1  | 99 | 3  | 0  | 0  |
| 0  | 1  | 1  | 1  | 99 | 3  | 0  | 0  |
| 0  | 0  | 0  | 0  | 0  | 2  | 2  | 2  |
| 0  | 0  | 0  | 0  | 0  | 0  | 0  | 0  |
| 0  | 0  | 1  | 1  | 99 | 4  | 1  | 1  |
| 0  | 0  | 1  | 0  | 99 | 0  | 0  | 0  |
| 99 | 99 | 99 | 99 | 99 | 99 | 99 | 99 |
| 0  | 1  | 2  | 0  | 99 | 0  | 0  | 0  |
| 1  | 1  | 1  | 1  | 99 | 2  | 1  | 1  |
| 0  | 0  | 0  | 1  | 0  | 0  | 0  | 0  |
| 99 | 99 | 99 | 99 | 99 | 99 | 99 | 99 |
| 0  | 0  | 0  | 0  | 99 | 0  | 0  | 0  |
| 0  | 0  | 0  | 1  | 0  | 0  | 0  | 0  |
| 0  | 0  | 0  | 0  | 0  | 2  | 1  | 1  |
| 0  | 0  | 0  | 0  | 0  | 0  | 0  | 0  |
| 0  | 0  | 0  | 0  | 0  | 0  | 0  | 0  |
| 0  | 0  | 0  | 0  | 0  | 0  | 0  | 0  |
| 0  | 0  | 2  | 0  | 99 | 4  | 4  | 4  |
| 0  | 0  | 0  | 0  | 99 | 1  | 0  | 0  |
| 0  | 0  | 0  | 0  | 0  | 2  | 0  | 0  |
| 0  | 0  | 0  | 0  | 0  | 0  | 0  | 0  |
| 0  | 99 | 99 | 0  | 99 | 0  | 1  | 1  |
| 0  | 0  | 0  | 0  | 0  | 1  | 1  | 1  |
| 0  | 0  | 1  | 0  | 99 | 2  | 2  | 2  |
| 0  | 1  | 0  | 0  | 99 | 2  | 0  | 0  |
| 1  | 0  | 1  | 1  | 99 | 1  | 0  | 0  |
| 0  | 0  | 0  | 0  | 99 | 0  | 0  | 0  |
| 0  | 0  | 0  | 0  | 0  | 0  | 0  | 0  |



|    |    |    |    |    |   |   |
|----|----|----|----|----|---|---|
| 0  | 0  | 0  | 0  | 0  | 1 | 0 |
| 0  | 2  | 2  | 2  | 99 | 0 | 1 |
| 0  | 0  | 1  | 0  | 99 | 0 | 0 |
| 0  | 0  | 0  | 1  | 99 | 1 | 1 |
| 0  | 0  | 0  | 0  | 1  | 3 | 0 |
| 0  | 0  | 0  | 0  | 0  | 0 | 0 |
| 1  | 0  | 1  | 1  | 99 | 0 | 0 |
| 1  | 0  | 1  | 1  | 99 | 3 | 1 |
| 0  | 0  | 0  | 1  | 1  | 2 | 1 |
| 0  | 1  | 1  | 1  | 99 | 0 | 0 |
| 0  | 0  | 0  | 0  | 99 | 1 | 0 |
| 0  | 0  | 0  | 1  | 99 | 2 | 3 |
| 2  | 0  | 2  | 2  | 99 | 0 | 0 |
| 0  | 99 | 99 | 1  | 99 | 1 | 2 |
| 0  | 0  | 0  | 0  | 0  | 0 | 0 |
| 1  | 0  | 0  | 2  | 99 | 2 | 2 |
| 99 | 99 | 99 | 99 | 99 | 4 | 4 |
| 0  | 0  | 0  | 0  | 99 | 0 | 2 |
| 1  | 0  | 1  | 1  | 99 | 1 | 0 |
| 0  | 2  | 2  | 2  | 99 | 2 | 2 |
| 0  | 0  | 0  | 0  | 99 | 4 | 4 |
| 0  | 0  | 1  | 0  | 99 | 0 | 0 |
| 0  | 0  | 0  | 0  | 99 | 0 | 0 |
| 0  | 0  | 0  | 0  | 0  | 0 | 0 |
| 0  | 0  | 1  | 2  | 99 | 1 | 0 |
| 0  | 0  | 0  | 0  | 0  | 0 | 0 |
| 0  | 0  | 0  | 2  | 0  | 4 | 4 |
| 0  | 0  | 0  | 0  | 99 | 0 | 0 |
| 0  | 0  | 0  | 0  | 99 | 0 | 0 |
| 2  | 0  | 2  | 0  | 99 | 4 | 1 |
| 0  | 0  | 2  | 0  | 99 | 2 | 2 |
| 0  | 0  | 0  | 0  | 99 | 0 | 0 |
| 0  | 0  | 1  | 0  | 99 | 0 | 0 |
| 1  | 1  | 2  | 2  | 99 | 0 | 0 |
| 1  | 0  | 1  | 1  | 99 | 0 | 0 |
| 0  | 0  | 1  | 0  | 99 | 0 | 0 |
| 0  | 0  | 0  | 0  | 99 | 0 | 0 |
| 2  | 0  | 2  | 0  | 99 | 0 | 0 |
| 0  | 0  | 0  | 1  | 99 | 0 | 0 |
| 0  | 0  | 1  | 1  | 99 | 0 | 0 |
| 2  | 1  | 2  | 2  | 99 | 3 | 4 |
| 0  | 0  | 0  | 0  | 99 | 0 | 0 |
| 1  | 1  | 1  | 0  | 99 | 0 | 0 |
| 2  | 0  | 1  | 1  | 99 | 2 | 2 |
| 0  | 0  | 0  | 0  | 99 | 0 | 0 |
| 0  | 0  | 1  | 0  | 99 | 0 | 0 |
| 1  | 1  | 0  | 0  | 99 | 1 | 0 |
| 0  | 0  | 1  | 0  | 99 | 2 | 1 |

|    |    |    |    |    |    |    |
|----|----|----|----|----|----|----|
| 0  | 0  | 0  | 0  | 0  | 1  | 0  |
| 0  | 0  | 0  | 0  | 99 | 0  | 0  |
| 0  | 0  | 0  | 0  | 99 | 0  | 0  |
| 0  | 0  | 2  | 2  | 99 | 0  | 0  |
| 0  | 0  | 1  | 0  | 99 | 0  | 0  |
| 0  | 0  | 1  | 0  | 99 | 1  | 0  |
| 0  | 0  | 0  | 0  | 99 | 1  | 0  |
| 0  | 1  | 1  | 1  | 99 | 2  | 1  |
| 0  | 0  | 2  | 2  | 99 | 2  | 2  |
| 0  | 0  | 2  | 0  | 99 | 0  | 0  |
| 0  | 2  | 2  | 2  | 99 | 0  | 0  |
| 1  | 2  | 2  | 2  | 99 | 2  | 3  |
| 0  | 1  | 1  | 0  | 99 | 3  | 1  |
| 0  | 0  | 1  | 0  | 99 | 0  | 0  |
| 0  | 0  | 0  | 1  | 99 | 1  | 1  |
| 99 | 99 | 99 | 99 | 99 | 99 | 99 |
| 0  | 0  | 0  | 0  | 99 | 2  | 2  |
| 0  | 1  | 2  | 2  | 99 | 4  | 4  |
| 2  | 0  | 0  | 1  | 99 | 2  | 1  |
| 0  | 0  | 1  | 0  | 99 | 2  | 0  |
| 0  | 0  | 1  | 1  | 99 | 2  | 0  |
| 1  | 1  | 2  | 2  | 99 | 0  | 0  |
| 0  | 0  | 0  | 0  | 99 | 0  | 0  |
| 0  | 0  | 1  | 0  | 99 | 0  | 0  |
| 0  | 0  | 1  | 0  | 99 | 2  | 4  |
| 0  | 0  | 0  | 0  | 0  | 99 | 99 |
| 0  | 0  | 0  | 0  | 1  | 2  | 0  |
| 0  | 0  | 0  | 0  | 0  | 2  | 1  |
| 2  | 0  | 1  | 1  | 2  | 4  | 2  |
| 0  | 0  | 0  | 0  | 0  | 0  | 1  |
| 0  | 0  | 0  | 0  | 1  | 0  | 0  |
| 0  | 0  | 0  | 0  | 1  | 1  | 2  |
| 0  | 0  | 0  | 0  | 0  | 1  | 1  |
| 99 | 99 | 99 | 99 | 99 | 99 | 99 |
| 0  | 1  | 0  | 0  | 0  | 1  | 0  |
| 99 | 0  | 1  | 0  | 2  | 1  | 0  |
| 0  | 0  | 1  | 0  | 0  | 2  | 1  |
| 0  | 0  | 0  | 0  | 0  | 1  | 1  |
| 0  | 0  | 1  | 1  | 2  | 1  | 0  |
| 0  | 0  | 0  | 0  | 0  | 4  | 0  |
| 0  | 1  | 1  | 0  | 1  | 3  | 2  |
| 0  | 1  | 2  | 2  | 2  | 3  | 1  |
| 2  | 2  | 2  | 1  | 2  | 4  | 4  |
| 0  | 0  | 2  | 1  | 2  | 1  | 0  |
| 99 | 99 | 99 | 99 | 99 | 0  | 0  |
| 0  | 0  | 0  | 0  | 0  | 4  | 4  |
| 99 | 99 | 0  | 0  | 0  | 1  | 0  |
| 0  | 0  | 2  | 0  | 2  | 3  | 1  |

|    |    |    |    |    |   |   |
|----|----|----|----|----|---|---|
| 0  | 0  | 0  | 0  | 0  | 2 | 2 |
| 0  | 0  | 0  | 1  | 0  | 1 | 1 |
| 0  | 0  | 0  | 0  | 2  | 3 | 3 |
| 1  | 99 | 1  | 2  | 0  | 4 | 4 |
| 0  | 0  | 0  | 0  | 0  | 1 | 1 |
| 0  | 0  | 0  | 0  | 0  | 4 | 0 |
| 0  | 0  | 0  | 1  | 1  | 0 | 0 |
| 1  | 0  | 0  | 0  | 2  | 3 | 1 |
| 0  | 0  | 0  | 0  | 2  | 2 | 1 |
| 0  | 0  | 1  | 0  | 2  | 4 | 4 |
| 0  | 0  | 1  | 1  | 2  | 1 | 0 |
| 1  | 0  | 1  | 1  | 0  | 3 | 2 |
| 0  | 0  | 0  | 0  | 1  | 4 | 2 |
| 1  | 0  | 2  | 2  | 2  | 4 | 4 |
| 99 | 99 | 2  | 1  | 0  | 2 | 4 |
| 0  | 0  | 1  | 0  | 0  | 4 | 3 |
| 0  | 0  | 1  | 0  | 0  | 1 | 1 |
| 99 | 0  | 0  | 0  | 0  | 2 | 0 |
| 0  | 0  | 0  | 0  | 0  | 2 | 0 |
| 99 | 99 | 99 | 99 | 99 | 0 | 0 |
| 1  | 0  | 2  | 2  | 2  | 4 | 4 |
| 0  | 0  | 1  | 0  | 1  | 0 | 0 |
| 0  | 0  | 1  | 0  | 2  | 0 | 4 |
| 0  | 0  | 1  | 0  | 2  | 2 | 2 |
| 0  | 0  | 0  | 1  | 1  | 0 | 0 |
| 2  | 1  | 2  | 1  | 2  | 2 | 3 |
| 0  | 1  | 0  | 1  | 1  | 2 | 2 |
| 0  | 0  | 1  | 0  | 2  | 0 | 0 |
| 0  | 0  | 0  | 0  | 0  | 0 | 0 |
| 0  | 0  | 2  | 1  | 2  | 4 | 2 |
| 0  | 0  | 0  | 0  | 1  | 0 | 0 |
| 0  | 0  | 1  | 1  | 1  | 2 | 1 |
| 0  | 0  | 0  | 0  | 0  | 2 | 1 |
| 2  | 1  | 2  | 2  | 2  | 0 | 1 |
| 0  | 0  | 0  | 0  | 2  | 0 | 1 |
| 0  | 0  | 0  | 0  | 1  | 2 | 1 |
| 0  | 0  | 0  | 0  | 0  | 0 | 0 |
| 0  | 0  | 0  | 0  | 1  | 4 | 4 |
| 0  | 0  | 0  | 0  | 0  | 0 | 0 |
| 0  | 0  | 1  | 0  | 2  | 4 | 4 |
| 0  | 0  | 0  | 0  | 1  | 4 | 1 |
| 1  | 1  | 1  | 2  | 0  | 2 | 2 |
| 0  | 0  | 1  | 0  | 2  | 0 | 0 |
| 0  | 0  | 0  | 0  | 1  | 2 | 1 |
| 0  | 0  | 1  | 0  | 0  | 0 | 0 |
| 0  | 0  | 1  | 0  | 1  | 1 | 0 |
| 0  | 0  | 1  | 0  | 1  | 1 | 1 |
| 0  | 0  | 1  | 0  | 1  | 3 | 3 |

|    |    |    |    |    |    |    |
|----|----|----|----|----|----|----|
| 0  | 0  | 2  | 1  | 0  | 0  | 0  |
| 0  | 0  | 0  | 0  | 0  | 1  | 0  |
| 0  | 0  | 1  | 0  | 1  | 1  | 1  |
| 0  | 0  | 1  | 0  | 0  | 0  | 0  |
| 2  | 0  | 2  | 2  | 2  | 2  | 3  |
| 1  | 0  | 1  | 0  | 2  | 2  | 2  |
| 0  | 0  | 0  | 1  | 2  | 0  | 0  |
| 0  | 0  | 0  | 0  | 1  | 4  | 0  |
| 0  | 0  | 0  | 0  | 0  | 0  | 0  |
| 0  | 0  | 2  | 0  | 2  | 4  | 1  |
| 0  | 0  | 1  | 1  | 1  | 1  | 0  |
| 2  | 2  | 2  | 2  | 2  | 0  | 0  |
| 99 | 99 | 99 | 99 | 99 | 99 | 99 |
| 0  | 0  | 0  | 0  | 0  | 2  | 0  |
| 0  | 0  | 0  | 0  | 0  | 0  | 0  |
| 0  | 0  | 2  | 1  | 2  | 2  | 1  |
| 1  | 0  | 2  | 2  | 2  | 2  | 2  |
| 0  | 0  | 1  | 0  | 0  | 1  | 0  |
| 0  | 0  | 1  | 0  | 2  | 2  | 2  |
| 1  | 1  | 2  | 2  | 2  | 0  | 0  |
| 0  | 0  | 0  | 0  | 1  | 2  | 1  |
| 0  | 0  | 0  | 0  | 1  | 1  | 1  |
| 0  | 0  | 0  | 0  | 2  | 1  | 1  |
| 1  | 0  | 2  | 2  | 2  | 2  | 0  |
| 1  | 0  | 0  | 2  | 0  | 2  | 3  |
| 0  | 0  | 1  | 0  | 1  | 2  | 0  |
| 2  | 2  | 2  | 2  | 2  | 3  | 0  |
| 0  | 1  | 1  | 1  | 1  | 1  | 2  |
| 0  | 0  | 0  | 0  | 2  | 0  | 0  |
| 0  | 0  | 0  | 0  | 0  | 1  | 1  |
| 0  | 0  | 2  | 2  | 1  | 4  | 4  |
| 0  | 0  | 0  | 0  | 2  | 2  | 3  |
| 0  | 0  | 1  | 0  | 0  | 1  | 0  |
| 1  | 1  | 2  | 1  | 2  | 2  | 0  |
| 0  | 0  | 1  | 0  | 1  | 1  | 0  |
| 0  | 0  | 0  | 0  | 0  | 0  | 0  |
| 0  | 0  | 2  | 0  | 2  | 1  | 0  |
| 0  | 0  | 0  | 0  | 1  | 1  | 0  |
| 0  | 0  | 2  | 0  | 2  | 2  | 0  |
| 0  | 0  | 0  | 0  | 0  | 0  | 0  |
| 0  | 0  | 2  | 1  | 2  | 2  | 1  |
| 0  | 0  | 1  | 0  | 0  | 0  | 0  |
| 0  | 0  | 0  | 0  | 1  | 2  | 1  |
| 0  | 0  | 1  | 0  | 0  | 0  | 0  |
| 0  | 0  | 0  | 0  | 0  | 1  | 0  |
| 0  | 0  | 0  | 0  | 0  | 1  | 1  |
| 0  | 0  | 1  | 1  | 1  | 0  | 0  |
| 0  | 0  | 0  | 0  | 1  | 4  | 1  |

|    |    |   |   |   |   |   |
|----|----|---|---|---|---|---|
| 0  | 0  | 1 | 0 | 0 | 1 | 0 |
| 2  | 1  | 1 | 2 | 2 | 2 | 3 |
| 0  | 1  | 0 | 0 | 0 | 1 | 1 |
| 0  | 0  | 1 | 0 | 0 | 1 | 0 |
| 0  | 0  | 1 | 1 | 0 | 0 | 1 |
| 0  | 0  | 0 | 0 | 0 | 2 | 1 |
| 0  | 0  | 0 | 0 | 0 | 2 | 1 |
| 0  | 0  | 1 | 0 | 0 | 0 | 0 |
| 0  | 0  | 0 | 0 | 1 | 0 | 0 |
| 0  | 0  | 0 | 0 | 0 | 1 | 0 |
| 0  | 0  | 1 | 1 | 1 | 2 | 2 |
| 0  | 0  | 1 | 1 | 1 | 3 | 2 |
| 0  | 0  | 1 | 1 | 2 | 2 | 1 |
| 0  | 0  | 0 | 0 | 0 | 0 | 0 |
| 0  | 0  | 0 | 0 | 0 | 0 | 0 |
| 0  | 0  | 1 | 0 | 2 | 2 | 4 |
| 0  | 0  | 1 | 1 | 1 | 1 | 0 |
| 0  | 0  | 1 | 0 | 2 | 4 | 1 |
| 0  | 0  | 2 | 1 | 1 | 0 | 0 |
| 99 | 99 | 0 | 0 | 0 | 4 | 4 |
| 0  | 0  | 0 | 1 | 2 | 2 | 1 |
| 0  | 0  | 2 | 0 | 0 | 4 | 4 |
| 0  | 0  | 0 | 0 | 1 | 4 | 1 |
| 0  | 1  | 1 | 1 | 1 | 0 | 0 |
| 0  | 0  | 1 | 0 | 1 | 4 | 0 |
| 0  | 0  | 1 | 0 | 2 | 2 | 2 |
| 0  | 0  | 0 | 0 | 0 | 2 | 1 |
| 1  | 0  | 1 | 0 | 2 | 0 | 0 |
| 0  | 0  | 1 | 1 | 1 | 4 | 2 |
| 0  | 1  | 2 | 1 | 1 | 1 | 1 |
| 0  | 0  | 2 | 2 | 1 | 2 | 2 |
| 0  | 0  | 0 | 0 | 1 | 4 | 4 |
| 0  | 0  | 0 | 0 | 0 | 0 | 0 |
| 0  | 1  | 2 | 2 | 2 | 2 | 2 |
| 0  | 0  | 1 | 1 | 1 | 1 | 0 |
| 1  | 0  | 1 | 1 | 1 | 1 | 1 |
| 0  | 0  | 1 | 1 | 0 | 0 | 0 |
| 1  | 1  | 1 | 1 | 1 | 2 | 4 |
| 1  | 0  | 1 | 0 | 1 | 2 | 1 |
| 1  | 0  | 0 | 1 | 2 | 0 | 2 |
| 0  | 0  | 0 | 0 | 0 | 0 | 0 |
| 0  | 0  | 0 | 0 | 2 | 2 | 0 |
| 0  | 0  | 0 | 0 | 2 | 1 | 0 |
| 0  | 0  | 1 | 0 | 2 | 2 | 2 |
| 0  | 0  | 0 | 0 | 1 | 1 | 3 |
| 0  | 0  | 2 | 0 | 0 | 0 | 0 |
| 1  | 1  | 2 | 2 | 0 | 2 | 1 |
| 2  | 2  | 2 | 2 | 2 | 2 | 0 |

|    |   |    |   |   |   |    |
|----|---|----|---|---|---|----|
| 0  | 0 | 1  | 0 | 2 | 2 | 1  |
| 0  | 0 | 0  | 0 | 1 | 0 | 2  |
| 0  | 0 | 1  | 0 | 0 | 2 | 4  |
| 0  | 1 | 0  | 0 | 0 | 2 | 0  |
| 0  | 0 | 0  | 0 | 0 | 4 | 0  |
| 1  | 2 | 2  | 2 | 2 | 1 | 0  |
| 0  | 0 | 0  | 0 | 0 | 0 | 0  |
| 0  | 0 | 1  | 1 | 1 | 3 | 3  |
| 0  | 0 | 1  | 0 | 1 | 2 | 2  |
| 0  | 0 | 0  | 0 | 0 | 2 | 1  |
| 0  | 0 | 1  | 0 | 1 | 2 | 0  |
| 1  | 1 | 1  | 1 | 1 | 3 | 2  |
| 0  | 1 | 2  | 2 | 2 | 0 | 0  |
| 0  | 0 | 1  | 1 | 0 | 2 | 2  |
| 2  | 1 | 2  | 1 | 1 | 3 | 2  |
| 1  | 0 | 1  | 1 | 1 | 3 | 4  |
| 0  | 0 | 1  | 0 | 1 | 1 | 0  |
| 0  | 1 | 1  | 0 | 0 | 0 | 0  |
| 1  | 0 | 2  | 2 | 2 | 4 | 4  |
| 1  | 0 | 1  | 1 | 2 | 4 | 1  |
| 1  | 1 | 1  | 1 | 1 | 0 | 0  |
| 0  | 0 | 0  | 0 | 0 | 0 | 0  |
| 0  | 0 | 0  | 0 | 1 | 0 | 0  |
| 0  | 0 | 0  | 0 | 0 | 0 | 0  |
| 0  | 1 | 1  | 1 | 1 | 2 | 99 |
| 1  | 1 | 2  | 1 | 0 | 0 | 0  |
| 0  | 0 | 0  | 0 | 1 | 0 | 0  |
| 2  | 2 | 2  | 2 | 1 | 2 | 2  |
| 0  | 1 | 1  | 1 | 1 | 0 | 0  |
| 0  | 0 | 2  | 2 | 2 | 0 | 0  |
| 1  | 1 | 2  | 1 | 2 | 0 | 2  |
| 0  | 0 | 0  | 0 | 2 | 1 | 0  |
| 0  | 1 | 1  | 0 | 0 | 1 | 0  |
| 0  | 1 | 1  | 0 | 1 | 0 | 0  |
| 0  | 0 | 1  | 1 | 1 | 4 | 4  |
| 0  | 0 | 1  | 1 | 0 | 2 | 0  |
| 0  | 0 | 0  | 0 | 0 | 0 | 0  |
| 0  | 0 | 1  | 1 | 1 | 1 | 0  |
| 0  | 0 | 1  | 2 | 2 | 2 | 2  |
| 0  | 0 | 1  | 0 | 0 | 0 | 0  |
| 2  | 2 | 2  | 2 | 2 | 1 | 1  |
| 1  | 1 | 2  | 2 | 2 | 4 | 4  |
| 99 |   | 99 | 0 | 1 | 1 | 4  |
| 1  | 1 | 2  | 1 | 2 | 2 | 1  |
| 0  | 0 | 1  | 0 | 2 | 2 | 0  |
| 0  | 2 | 2  | 1 | 2 | 3 | 3  |
| 0  | 0 | 1  | 0 | 0 | 1 | 0  |
| 1  | 0 | 2  | 2 | 1 | 0 | 0  |

|    |    |    |    |    |    |    |
|----|----|----|----|----|----|----|
| 0  | 0  | 1  | 1  | 0  | 4  | 1  |
| 0  | 0  | 0  | 0  | 0  | 0  | 0  |
| 0  | 0  | 1  | 1  | 1  | 0  | 0  |
| 0  | 0  | 0  | 0  | 0  | 1  | 1  |
| 99 | 99 | 99 | 99 | 99 | 99 | 99 |
| 1  | 1  | 2  | 1  | 2  | 0  | 4  |
| 0  | 99 | 2  | 2  | 0  | 2  | 3  |
| 0  | 0  | 0  | 0  | 0  | 1  | 0  |
| 99 | 0  | 1  | 0  | 0  | 2  | 1  |
| 0  | 0  | 0  | 0  | 0  | 0  | 0  |
| 1  | 0  | 1  | 1  | 1  | 4  | 1  |
| 0  | 0  | 0  | 0  | 1  | 1  | 0  |
| 1  | 0  | 0  | 0  | 2  | 4  | 0  |
| 0  | 0  | 0  | 0  | 0  | 0  | 0  |
| 0  | 0  | 0  | 0  | 0  | 0  | 99 |
| 2  | 2  | 2  | 2  | 0  | 4  | 4  |
| 99 | 0  | 2  | 0  | 0  | 1  | 2  |
| 0  | 1  | 1  | 0  | 0  | 2  | 4  |
| 2  | 0  | 1  | 1  | 2  | 0  | 0  |
| 0  | 0  | 1  | 1  | 1  | 2  | 4  |
| 0  | 0  | 1  | 0  | 0  | 3  | 2  |
| 0  | 0  | 0  | 0  | 1  | 1  | 1  |
| 0  | 0  | 1  | 1  | 1  | 2  | 1  |
| 1  | 0  | 1  | 1  | 1  | 1  | 1  |
| 0  | 0  | 1  | 0  | 0  | 4  | 3  |
| 0  | 0  | 1  | 1  | 1  | 1  | 0  |
| 0  | 0  | 1  | 1  | 1  | 0  | 0  |
| 0  | 0  | 1  | 0  | 1  | 2  | 1  |
| 0  | 0  | 0  | 0  | 2  | 4  | 2  |
| 0  | 0  | 1  | 0  | 0  | 2  | 1  |
| 0  | 1  | 0  | 0  | 1  | 0  | 0  |
| 0  | 0  | 0  | 2  | 0  | 1  | 0  |
| 0  | 0  | 0  | 0  | 2  | 0  | 1  |
| 0  | 0  | 0  | 0  | 0  | 0  | 4  |
| 99 | 0  | 0  | 0  | 1  | 0  | 3  |
| 0  | 0  | 1  | 0  | 0  | 1  | 0  |
| 0  | 0  | 0  | 0  | 0  | 3  | 1  |
| 0  | 0  | 2  | 1  | 0  | 2  | 2  |
| 0  | 0  | 1  | 0  | 0  | 2  | 0  |
| 0  | 1  | 0  | 0  | 0  | 0  | 0  |
| 0  | 0  | 1  | 1  | 0  | 1  | 1  |
| 0  | 0  | 0  | 0  | 0  | 0  | 0  |
| 0  | 0  | 0  | 1  | 1  | 2  | 0  |
| 0  | 0  | 1  | 1  | 1  | 1  | 2  |
| 0  | 0  | 1  | 0  | 0  | 0  | 1  |
| 0  | 0  | 0  | 0  | 0  | 2  | 99 |
| 0  | 0  | 1  | 0  | 1  | 2  | 1  |
| 0  | 0  | 1  | 0  | 0  | 0  | 1  |

|    |   |   |   |    |   |    |
|----|---|---|---|----|---|----|
| 1  | 0 | 1 | 2 | 2  | 1 | 0  |
| 0  | 0 | 0 | 0 | 2  | 4 | 4  |
| 0  | 0 | 0 | 0 | 0  | 0 | 1  |
| 0  | 0 | 2 | 1 | 1  | 2 | 3  |
| 0  | 1 | 1 | 1 | 0  | 3 | 2  |
| 0  | 0 | 0 | 0 | 0  | 2 | 2  |
| 0  | 0 | 1 | 1 | 0  | 2 | 0  |
| 0  | 0 | 1 | 1 | 1  | 3 | 2  |
| 0  | 0 | 0 | 0 | 0  | 0 | 1  |
| 0  | 0 | 1 | 0 | 1  | 0 | 0  |
| 0  | 0 | 0 | 0 | 0  | 2 | 2  |
| 0  | 0 | 0 | 1 | 0  | 2 | 2  |
| 0  | 0 | 1 | 2 | 2  | 2 | 1  |
| 2  | 0 | 2 | 2 | 2  | 3 | 4  |
| 0  | 0 | 0 | 0 | 0  | 1 | 0  |
| 0  | 0 | 1 | 0 | 1  | 1 | 0  |
| 0  | 0 | 1 | 0 | 1  | 0 | 0  |
| 99 | 0 | 0 | 1 | 99 | 4 | 1  |
| 0  | 0 | 1 | 0 | 0  | 0 | 0  |
| 0  | 0 | 1 | 0 | 0  | 1 | 0  |
| 0  | 0 | 0 | 1 | 0  | 0 | 0  |
| 0  | 1 | 2 | 2 | 2  | 1 | 4  |
| 99 | 0 | 1 | 1 | 1  | 1 | 1  |
| 2  | 2 | 2 | 2 | 2  | 4 | 4  |
| 0  | 0 | 0 | 0 | 2  | 0 | 0  |
| 0  | 0 | 0 | 0 | 0  | 1 | 99 |
| 0  | 0 | 0 | 0 | 0  | 0 | 2  |
| 1  | 0 | 1 | 0 | 0  | 4 | 0  |
| 1  | 1 | 1 | 2 | 1  | 3 | 4  |
| 0  | 0 | 1 | 0 | 99 | 0 | 1  |
| 0  | 0 | 0 | 0 | 0  | 0 | 0  |
| 0  | 0 | 0 | 0 | 99 | 4 | 2  |
| 0  | 0 | 0 | 0 | 0  | 0 | 0  |
| 0  | 0 | 1 | 2 | 99 | 4 | 4  |
| 0  | 0 | 0 | 0 | 0  | 1 | 0  |
| 1  | 0 | 1 | 0 | 2  | 2 | 0  |
| 0  | 0 | 0 | 0 | 0  | 0 | 0  |
| 1  | 0 | 1 | 1 | 1  | 2 | 3  |
| 0  | 0 | 0 | 0 | 2  | 0 | 0  |
| 1  | 0 | 1 | 1 | 1  | 1 | 1  |
| 0  | 0 | 1 | 0 | 1  | 1 | 0  |
| 0  | 0 | 1 | 0 | 0  | 2 | 2  |
| 0  | 0 | 0 | 0 | 2  | 1 | 2  |
| 0  | 0 | 1 | 0 | 2  | 0 | 0  |
| 0  | 1 | 2 | 2 | 2  | 2 | 0  |
| 0  | 0 | 1 | 0 | 0  | 2 | 0  |
| 0  | 0 | 0 | 0 | 1  | 2 | 3  |
| 0  | 0 | 1 | 0 | 1  | 0 | 1  |



|    |    |    |    |    |    |    |
|----|----|----|----|----|----|----|
| 0  | 1  | 1  | 1  | 1  | 0  | 1  |
| 0  | 0  | 2  | 0  | 2  | 0  | 2  |
| 0  | 0  | 1  | 1  | 1  | 0  | 0  |
| 1  | 0  | 0  | 0  | 1  | 1  | 0  |
| 99 | 99 | 99 | 99 | 99 | 99 | 99 |
| 99 | 0  | 1  | 1  | 99 | 0  | 0  |
| 2  | 2  | 2  | 2  | 2  | 0  | 0  |
| 0  | 0  | 0  | 0  | 0  | 0  | 0  |
| 0  | 0  | 1  | 1  | 1  | 0  | 0  |
| 0  | 0  | 0  | 0  | 1  | 2  | 1  |
| 0  | 0  | 0  | 1  | 99 | 1  | 0  |
| 0  | 1  | 1  | 1  | 99 | 3  | 4  |
| 0  | 0  | 1  | 1  | 99 | 0  | 0  |
| 2  | 2  | 2  | 2  | 99 | 99 | 99 |
| 0  | 0  | 1  | 0  | 99 | 0  | 0  |
| 1  | 2  | 2  | 2  | 99 | 1  | 0  |
| 0  | 0  | 0  | 0  | 0  | 1  | 1  |
| 0  | 0  | 0  | 0  | 0  | 4  | 4  |
| 0  | 0  | 0  | 0  | 1  | 2  | 0  |
| 0  | 1  | 1  | 1  | 99 | 0  | 0  |
| 0  | 0  | 0  | 0  | 0  | 0  | 0  |
| 0  | 0  | 1  | 2  | 99 | 4  | 0  |
| 0  | 0  | 0  | 1  | 99 | 0  | 0  |
| 1  | 0  | 2  | 2  | 99 | 0  | 3  |
| 1  | 0  | 2  | 0  | 99 | 2  | 1  |
| 2  | 1  | 2  | 2  | 99 | 4  | 4  |
| 0  | 0  | 0  | 0  | 99 | 0  | 0  |
| 0  | 0  | 0  | 0  | 0  | 0  | 0  |
| 0  | 0  | 1  | 0  | 99 | 4  | 4  |
| 0  | 0  | 1  | 1  | 99 | 0  | 0  |
| 1  | 1  | 1  | 1  | 99 | 1  | 0  |
| 0  | 0  | 1  | 1  | 99 | 0  | 0  |
| 0  | 0  | 2  | 1  | 99 | 4  | 3  |
| 0  | 0  | 0  | 0  | 99 | 3  | 1  |
| 0  | 0  | 0  | 0  | 99 | 2  | 2  |
| 0  | 0  | 0  | 0  | 0  | 4  | 4  |
| 2  | 1  | 1  | 1  | 99 | 2  | 2  |
| 1  | 0  | 2  | 2  | 99 | 2  | 2  |
| 0  | 0  | 0  | 0  | 0  | 2  | 2  |
| 0  | 0  | 2  | 1  | 99 | 3  | 1  |
| 1  | 1  | 1  | 1  | 99 | 2  | 2  |
| 2  | 0  | 1  | 0  | 99 | 1  | 2  |
| 0  | 0  | 0  | 1  | 99 | 1  | 1  |
| 1  | 1  | 1  | 1  | 1  | 2  | 1  |
| 0  | 0  | 2  | 2  | 99 | 0  | 0  |
| 1  | 1  | 1  | 1  | 99 | 2  | 1  |
| 1  | 0  | 1  | 0  | 99 | 0  | 0  |
| 0  | 0  | 0  | 0  | 2  | 0  | 0  |

|    |    |    |    |    |    |    |
|----|----|----|----|----|----|----|
| 0  | 0  | 1  | 0  | 1  | 4  | 2  |
| 0  | 0  | 0  | 0  | 0  | 0  | 0  |
| 0  | 0  | 0  | 0  | 1  | 0  | 1  |
| 0  | 0  | 0  | 0  | 2  | 1  | 1  |
| 0  | 0  | 0  | 0  | 0  | 0  | 0  |
| 0  | 0  | 1  | 0  | 2  | 3  | 1  |
| 0  | 0  | 0  | 0  | 0  | 0  | 0  |
| 0  | 0  | 0  | 0  | 1  | 3  | 2  |
| 0  | 0  | 1  | 0  | 1  | 0  | 0  |
| 0  | 1  | 2  | 2  | 2  | 4  | 3  |
| 0  | 0  | 0  | 2  | 2  | 1  | 0  |
| 0  | 0  | 1  | 0  | 1  | 3  | 3  |
| 1  | 1  | 1  | 1  | 1  | 1  | 0  |
| 0  | 0  | 1  | 0  | 1  | 2  | 1  |
| 0  | 0  | 0  | 0  | 0  | 1  | 1  |
| 0  | 0  | 0  | 0  | 0  | 1  | 3  |
| 0  | 0  | 0  | 0  | 2  | 2  | 0  |
| 0  | 0  | 0  | 0  | 0  | 3  | 0  |
| 0  | 0  | 0  | 0  | 2  | 2  | 3  |
| 0  | 0  | 0  | 0  | 0  | 2  | 0  |
| 0  | 1  | 2  | 2  | 2  | 2  | 2  |
| 0  | 0  | 0  | 0  | 0  | 1  | 0  |
| 0  | 1  | 1  | 0  | 2  | 0  | 0  |
| 0  | 0  | 1  | 0  | 0  | 2  | 3  |
| 0  | 0  | 1  | 0  | 0  | 0  | 0  |
| 0  | 0  | 1  | 0  | 2  | 2  | 4  |
| 0  | 1  | 2  | 2  | 2  | 0  | 0  |
| 1  | 1  | 1  | 1  | 1  | 1  | 1  |
| 0  | 0  | 1  | 0  | 0  | 0  | 0  |
| 0  | 0  | 1  | 0  | 1  | 4  | 2  |
| 0  | 0  | 0  | 0  | 1  | 1  | 0  |
| 2  | 0  | 1  | 2  | 1  | 1  | 2  |
| 0  | 0  | 2  | 1  | 2  | 4  | 2  |
| 1  | 1  | 1  | 1  | 1  | 2  | 2  |
| 0  | 0  | 2  | 0  | 2  | 3  | 0  |
| 0  | 0  | 0  | 0  | 1  | 2  | 2  |
| 0  | 0  | 1  | 0  | 2  | 4  | 0  |
| 1  | 0  | 2  | 2  | 2  | 1  | 2  |
| 1  | 0  | 2  | 0  | 0  | 2  | 0  |
| 0  | 1  | 2  | 2  | 2  | 2  | 2  |
| 1  | 0  | 1  | 0  | 0  | 3  | 1  |
| 0  | 0  | 2  | 2  | 0  | 4  | 0  |
| 99 | 99 | 99 | 99 | 99 | 99 | 99 |
| 1  | 0  | 2  | 1  | 0  | 2  | 99 |
| 0  | 0  | 1  | 0  | 1  | 2  | 0  |
| 0  | 0  | 0  | 0  | 0  | 2  | 0  |
| 0  | 0  | 1  | 0  | 2  | 0  | 0  |
| 0  | 0  | 1  | 1  | 2  | 2  | 4  |

|    |    |    |    |    |    |    |
|----|----|----|----|----|----|----|
| 0  | 0  | 0  | 0  | 1  | 2  | 2  |
| 0  | 0  | 1  | 0  | 1  | 0  | 0  |
| 0  | 0  | 0  | 0  | 1  | 2  | 1  |
| 0  | 0  | 2  | 2  | 2  | 2  | 2  |
| 1  | 0  | 0  | 0  | 2  | 3  | 4  |
| 0  | 0  | 1  | 0  | 2  | 1  | 0  |
| 0  | 0  | 0  | 0  | 1  | 2  | 1  |
| 2  | 2  | 2  | 2  | 2  | 0  | 0  |
| 0  | 0  | 2  | 0  | 2  | 0  | 0  |
| 0  | 0  | 1  | 0  | 2  | 1  | 0  |
| 0  | 0  | 0  | 0  | 0  | 0  | 0  |
| 0  | 0  | 1  | 1  | 2  | 2  | 1  |
| 1  | 0  | 1  | 0  | 0  | 3  | 0  |
| 0  | 0  | 0  | 0  | 0  | 0  | 0  |
| 0  | 1  | 1  | 1  | 1  | 1  | 1  |
| 0  | 1  | 1  | 1  | 1  | 1  | 1  |
| 0  | 0  | 0  | 0  | 2  | 4  | 2  |
| 0  | 0  | 0  | 0  | 0  | 0  | 0  |
| 1  | 0  | 2  | 0  | 2  | 1  | 0  |
| 1  | 1  | 1  | 0  | 0  | 2  | 1  |
| 0  | 0  | 1  | 1  | 0  | 0  | 0  |
| 99 | 99 | 99 | 99 | 1  | 4  | 2  |
| 0  | 1  | 0  | 0  | 0  | 0  | 0  |
| 0  | 0  | 2  | 2  | 2  | 4  | 0  |
| 0  | 0  | 1  | 0  | 1  | 3  | 2  |
| 0  | 0  | 0  | 0  | 0  | 0  | 0  |
| 1  | 0  | 0  | 0  | 0  | 2  | 1  |
| 99 | 99 | 99 | 99 | 99 | 99 | 99 |
| 0  | 0  | 0  | 0  | 1  | 1  | 0  |
| 0  | 0  | 1  | 0  | 2  | 0  | 0  |
| 99 | 99 | 99 | 99 | 99 | 99 | 99 |
| 2  | 0  | 1  | 1  | 2  | 0  | 0  |
| 0  | 0  | 1  | 0  | 0  | 1  | 0  |
| 0  | 1  | 2  | 1  | 1  | 3  | 2  |
| 0  | 1  | 1  | 1  | 2  | 0  | 0  |
| 0  | 0  | 1  | 0  | 2  | 2  | 2  |
| 2  | 0  | 1  | 1  | 1  | 4  | 4  |
| 0  | 0  | 2  | 1  | 2  | 0  | 0  |
| 1  | 0  | 1  | 2  | 2  | 99 | 99 |
| 0  | 0  | 1  | 0  | 0  | 0  | 1  |
| 1  | 1  | 1  | 1  | 1  | 1  | 0  |
| 2  | 2  | 2  | 2  | 2  | 0  | 0  |
| 1  | 0  | 0  | 0  | 1  | 1  | 1  |
| 2  | 0  | 1  | 1  | 2  | 2  | 2  |
| 0  | 1  | 1  | 1  | 1  | 1  | 0  |
| 1  | 0  | 1  | 0  | 2  | 1  | 1  |
| 0  | 2  | 2  | 2  | 2  | 1  | 0  |
| 1  | 0  | 0  | 0  | 2  | 1  | 0  |

|    |    |   |   |   |   |   |
|----|----|---|---|---|---|---|
| 0  | 0  | 1 | 0 | 1 | 3 | 2 |
| 0  | 2  | 2 | 2 | 1 | 0 | 0 |
| 0  | 0  | 0 | 0 | 0 | 4 | 4 |
| 0  | 0  | 0 | 0 | 0 | 2 | 0 |
| 2  | 1  | 2 | 2 | 1 | 4 | 4 |
| 1  | 2  | 0 | 1 | 2 | 4 | 0 |
| 0  | 0  | 0 | 0 | 0 | 0 | 0 |
| 1  | 1  | 1 | 1 | 1 | 1 | 1 |
| 99 | 99 | 0 | 0 | 0 | 0 | 0 |
| 0  | 0  | 0 | 0 | 0 | 0 | 0 |
| 0  | 1  | 1 | 0 | 0 | 3 | 2 |
| 1  | 0  | 2 | 0 | 2 | 2 | 1 |
| 0  | 1  | 1 | 2 | 2 | 2 | 0 |
| 1  | 1  | 1 | 0 | 2 | 1 | 0 |
| 1  | 0  | 1 | 1 | 1 | 1 | 1 |
| 0  | 0  | 1 | 0 | 0 | 2 | 1 |
| 0  | 0  | 2 | 2 | 0 | 4 | 4 |
| 0  | 0  | 1 | 1 | 2 | 1 | 2 |
| 0  | 0  | 1 | 1 | 0 | 1 | 0 |
| 0  | 0  | 0 | 0 | 0 | 1 | 0 |
| 1  | 1  | 2 | 1 | 2 | 2 | 1 |
| 1  | 0  | 1 | 2 | 0 | 0 | 0 |
| 1  | 0  | 1 | 1 | 1 | 1 | 0 |
| 0  | 0  | 1 | 1 | 1 | 1 | 1 |
| 0  | 0  | 1 | 0 | 0 | 3 | 3 |
| 1  | 0  | 2 | 2 | 1 | 0 | 0 |
| 0  | 0  | 1 | 0 | 0 | 0 | 0 |
| 2  | 0  | 2 | 2 | 0 | 0 | 1 |
| 0  | 0  | 1 | 0 | 0 | 4 | 4 |
| 0  | 0  | 0 | 0 | 1 | 1 | 0 |
| 0  | 0  | 1 | 0 | 1 | 2 | 2 |
| 0  | 0  | 0 | 0 | 0 | 0 | 0 |
| 2  | 0  | 1 | 1 | 2 | 4 | 4 |
| 0  | 0  | 0 | 0 | 2 | 2 | 0 |
| 1  | 0  | 0 | 0 | 0 | 1 | 0 |
| 2  | 1  | 2 | 0 | 2 | 4 | 1 |
| 0  | 0  | 1 | 1 | 1 | 4 | 4 |
| 0  | 0  | 0 | 0 | 1 | 1 | 1 |
| 0  | 0  | 1 | 0 | 0 | 1 | 0 |
| 0  | 0  | 1 | 1 | 1 | 1 | 0 |
| 2  | 2  | 2 | 2 | 2 | 4 | 4 |
| 0  | 0  | 1 | 0 | 0 | 0 | 0 |
| 1  | 0  | 1 | 1 | 2 | 2 | 1 |
| 0  | 0  | 2 | 2 | 2 | 3 | 0 |
| 0  | 0  | 0 | 0 | 0 | 2 | 0 |
| 0  | 0  | 1 | 0 | 0 | 3 | 4 |
| 0  | 0  | 1 | 0 | 1 | 0 | 0 |
| 1  | 0  | 0 | 1 | 2 | 0 | 0 |

|    |    |    |    |    |   |    |
|----|----|----|----|----|---|----|
| 2  | 0  | 2  | 1  | 2  | 4 | 4  |
| 0  | 0  | 0  | 0  | 0  | 0 | 1  |
| 0  | 0  | 0  | 0  | 1  | 1 | 1  |
| 0  | 1  | 2  | 2  | 2  | 3 | 3  |
| 0  | 0  | 0  | 0  | 0  | 0 | 0  |
| 1  | 0  | 1  | 1  | 2  | 0 | 1  |
| 0  | 0  | 1  | 0  | 0  | 0 | 0  |
| 2  | 0  | 1  | 0  | 0  | 4 | 4  |
| 2  | 2  | 2  | 2  | 0  | 0 | 4  |
| 0  | 0  | 2  | 2  | 1  | 3 | 0  |
| 1  | 99 | 2  | 2  | 2  | 3 | 2  |
| 0  | 0  | 0  | 0  | 0  | 0 | 0  |
| 0  | 0  | 0  | 0  | 1  | 0 | 0  |
| 0  | 0  | 1  | 1  | 0  | 1 | 0  |
| 0  | 0  | 1  | 1  | 1  | 3 | 2  |
| 1  | 2  | 1  | 2  | 2  | 3 | 1  |
| 0  | 0  | 1  | 0  | 2  | 2 | 1  |
| 0  | 0  | 0  | 0  | 0  | 1 | 0  |
| 0  | 0  | 0  | 0  | 1  | 4 | 3  |
| 1  | 0  | 1  | 1  | 2  | 2 | 1  |
| 0  | 0  | 0  | 0  | 2  | 0 | 0  |
| 0  | 0  | 1  | 1  | 2  | 2 | 3  |
| 2  | 0  | 0  | 0  | 0  | 3 | 99 |
| 0  | 0  | 0  | 0  | 2  | 1 | 0  |
| 0  | 0  | 0  | 0  | 0  | 1 | 0  |
| 0  | 0  | 0  | 0  | 0  | 0 | 0  |
| 0  | 0  | 0  | 0  | 0  | 0 | 0  |
| 1  | 0  | 0  | 0  | 1  | 0 | 0  |
| 0  | 0  | 1  | 0  | 0  | 0 | 0  |
| 0  | 0  | 0  | 0  | 0  | 1 | 0  |
| 2  | 0  | 1  | 0  | 2  | 1 | 0  |
| 0  | 0  | 0  | 0  | 0  | 0 | 0  |
| 0  | 0  | 1  | 1  | 2  | 4 | 3  |
| 0  | 0  | 0  | 0  | 0  | 4 | 3  |
| 0  | 0  | 1  | 2  | 0  | 1 | 0  |
| 0  | 1  | 0  | 0  | 1  | 0 | 0  |
| 0  | 0  | 0  | 0  | 2  | 0 | 0  |
| 1  | 0  | 1  | 0  | 1  | 1 | 3  |
| 99 | 99 | 99 | 99 | 99 | 0 | 0  |
| 0  | 0  | 1  | 1  | 1  | 1 | 1  |
| 0  | 0  | 0  | 0  | 0  | 4 | 4  |
| 0  | 2  | 2  | 2  | 2  | 0 | 1  |
| 2  | 2  | 2  | 2  | 2  | 2 | 2  |
| 2  | 2  | 2  | 2  | 2  | 1 | 0  |
| 0  | 0  | 0  | 0  | 0  | 0 | 0  |
| 0  | 2  | 2  | 0  | 2  | 0 | 0  |
| 0  | 0  | 1  | 0  | 2  | 3 | 3  |
| 1  | 0  | 2  | 0  | 2  | 1 | 4  |

|    |   |   |   |   |   |   |
|----|---|---|---|---|---|---|
| 0  | 0 | 0 | 2 | 2 | 0 | 0 |
| 1  | 1 | 1 | 1 | 1 | 0 | 0 |
| 0  | 0 | 0 | 1 | 1 | 0 | 0 |
| 0  | 0 | 0 | 0 | 2 | 0 | 0 |
| 1  | 1 | 1 | 1 | 1 | 2 | 0 |
| 0  | 0 | 0 | 0 | 0 | 0 | 0 |
| 0  | 0 | 0 | 0 | 0 | 0 | 0 |
| 1  | 0 | 0 | 0 | 2 | 1 | 0 |
| 0  | 0 | 2 | 2 | 0 | 3 | 0 |
| 1  | 1 | 1 | 1 | 1 | 1 | 1 |
| 1  | 0 | 1 | 1 | 1 | 2 | 3 |
| 1  | 0 | 1 | 2 | 2 | 4 | 3 |
| 0  | 0 | 2 | 1 | 2 | 2 | 2 |
| 0  | 0 | 1 | 1 | 1 | 3 | 3 |
| 0  | 0 | 2 | 2 | 2 | 2 | 1 |
| 0  | 0 | 0 | 1 | 1 | 1 | 0 |
| 2  | 2 | 2 | 2 | 2 | 2 | 2 |
| 1  | 0 | 1 | 2 | 2 | 2 | 2 |
| 0  | 0 | 1 | 0 | 0 | 4 | 4 |
| 0  | 0 | 1 | 0 | 2 | 3 | 3 |
| 2  | 0 | 1 | 0 | 0 | 0 | 0 |
| 0  | 0 | 2 | 1 | 2 | 0 | 0 |
| 0  | 0 | 1 | 1 | 0 | 2 | 2 |
| 0  | 1 | 1 | 1 | 0 | 1 | 2 |
| 0  | 1 | 1 | 1 | 0 | 1 | 2 |
| 0  | 0 | 1 | 1 | 2 | 3 | 4 |
| 0  | 0 | 1 | 1 | 1 | 3 | 4 |
| 0  | 0 | 0 | 0 | 1 | 1 | 4 |
| 0  | 0 | 0 | 0 | 0 | 2 | 4 |
| 0  | 0 | 0 | 0 | 0 | 4 | 4 |
| 0  | 0 | 0 | 0 | 0 | 0 | 4 |
| 0  | 0 | 0 | 0 | 0 | 4 | 0 |
| 0  | 0 | 1 | 0 | 0 | 1 | 2 |
| 0  | 0 | 0 | 0 | 0 | 1 | 1 |
| 1  | 1 | 1 | 1 | 1 | 2 | 4 |
| 0  | 0 | 0 | 0 | 0 | 1 | 1 |
| 0  | 0 | 0 | 0 | 0 | 1 | 0 |
| 99 | 1 | 2 | 2 | 2 | 0 | 0 |
| 0  | 0 | 0 | 0 | 0 | 0 | 0 |
| 0  | 0 | 0 | 0 | 0 | 0 | 0 |
| 0  | 0 | 0 | 0 | 0 | 0 | 1 |
| 0  | 0 | 0 | 0 | 0 | 1 | 2 |
| 0  | 0 | 0 | 0 | 0 | 1 | 0 |
| 0  | 0 | 1 | 1 | 1 | 1 | 0 |
| 0  | 0 | 1 | 0 | 0 | 0 | 0 |
| 0  | 0 | 0 | 0 | 0 | 0 | 0 |
| 0  | 0 | 0 | 0 | 0 | 0 | 0 |
| 0  | 0 | 0 | 0 | 0 | 0 | 0 |
| 0  | 0 | 1 | 0 | 0 | 2 | 0 |
| 0  | 0 | 0 | 0 | 0 | 0 | 0 |
| 0  | 0 | 1 | 0 | 0 | 0 | 0 |
| 0  | 0 | 1 | 0 | 0 | 0 | 1 |
| 1  | 0 | 2 | 2 | 2 | 1 | 0 |

|   |    |    |    |        |   |    |
|---|----|----|----|--------|---|----|
| 0 | 0  | 1  | 0  | #NULL! | 0 | 0  |
| 0 | 0  | 0  | 0  | #NULL! | 2 | 1  |
| 0 | 0  | 0  | 0  | #NULL! | 0 | 0  |
| 0 | 0  | 0  | 0  | #NULL! | 0 | 0  |
| 0 | 1  | 1  | 99 | #NULL! | 1 | 1  |
| 0 | 0  | 0  | 0  | #NULL! | 1 | 1  |
| 2 | 1  | 2  | 2  | #NULL! | 2 | 0  |
| 0 | 0  | 1  | 1  | #NULL! | 1 | 0  |
| 0 | 0  | 0  | 0  | #NULL! | 1 | 0  |
| 0 | 0  | 2  | 0  | #NULL! | 1 | 2  |
| 0 | 0  | 0  | 0  | #NULL! | 4 | 4  |
| 0 | 0  | 0  | 0  | #NULL! | 0 | 0  |
| 0 | 0  | 99 | 0  | #NULL! | 0 | 0  |
| 0 | 0  | 0  | 0  | #NULL! | 0 | 0  |
| 0 | 0  | 0  | 0  | #NULL! | 1 | 0  |
| 1 | 0  | 1  | 0  | #NULL! | 1 | 0  |
| 0 | 0  | 1  | 1  | #NULL! | 2 | 1  |
| 1 | 0  | 0  | 2  | #NULL! | 2 | 1  |
| 1 | 0  | 1  | 1  | #NULL! | 3 | 1  |
| 0 | 0  | 2  | 2  | #NULL! | 0 | 1  |
| 0 | 0  | 0  | 0  | #NULL! | 0 | 0  |
| 0 | 0  | 0  | 0  | #NULL! | 0 | 1  |
| 0 | 0  | 1  | 1  | #NULL! | 2 | 3  |
| 0 | 99 | 99 | 1  | #NULL! | 2 | 1  |
| 0 | 0  | 0  | 0  | #NULL! | 0 | 0  |
| 2 | 0  | 2  | 2  | #NULL! | 1 | 0  |
| 0 | 0  | 0  | 0  | #NULL! | 2 | 0  |
| 0 | 0  | 0  | 0  | #NULL! | 0 | 1  |
| 0 | 0  | 0  | 0  | #NULL! | 0 | 0  |
| 0 | 0  | 0  | 0  | #NULL! | 0 | 0  |
| 0 | 0  | 0  | 0  | #NULL! | 0 | 0  |
| 1 | 1  | 1  | 1  | #NULL! | 0 | 0  |
| 0 | 0  | 1  | 1  | #NULL! | 1 | 2  |
| 0 | 0  | 0  | 1  | #NULL! | 1 | 0  |
| 0 | 0  | 1  | 0  | #NULL! | 1 | 0  |
| 0 | 0  | 0  | 0  | #NULL! | 0 | 0  |
| 0 | 0  | 0  | 0  | #NULL! | 0 | 0  |
| 2 | 2  | 2  | 2  | #NULL! | 0 | 0  |
| 0 | 1  | 0  | 0  | #NULL! | 4 | 99 |
| 0 | 0  | 0  | 0  | #NULL! | 2 | 0  |
| 0 | 0  | 0  | 0  | #NULL! | 0 | 0  |
| 0 | 1  | 0  | 1  | #NULL! | 0 | 0  |
| 0 | 0  | 1  | 1  | #NULL! | 2 | 3  |
| 1 | 0  | 2  | 1  | #NULL! | 1 | 0  |
| 0 | 0  | 2  | 1  | #NULL! | 2 | 1  |
| 0 | 0  | 2  | 0  | #NULL! | 0 | 2  |
| 0 | 0  | 0  | 0  | #NULL! | 0 | 0  |
| 2 | 1  | 1  | 2  | #NULL! | 1 | 0  |

|   |   |   |    |        |    |    |
|---|---|---|----|--------|----|----|
| 0 | 0 | 0 | 0  | #NULL! | 0  | 0  |
| 0 | 0 | 0 | 0  | #NULL! | 0  | 3  |
| 0 | 0 | 0 | 0  | #NULL! | 99 | 99 |
| 0 | 0 | 0 | 0  | #NULL! | 0  | 0  |
| 0 | 0 | 0 | 0  | #NULL! | 1  | 1  |
| 0 | 0 | 0 | 1  | #NULL! | 1  | 0  |
| 0 | 0 | 0 | 0  | #NULL! | 0  | 0  |
| 0 | 0 | 0 | 0  | #NULL! | 1  | 0  |
| 1 | 1 | 1 | 1  | #NULL! | 0  | 0  |
| 0 | 0 | 1 | 0  | #NULL! | 2  | 1  |
| 1 | 0 | 2 | 0  | #NULL! | 0  | 1  |
| 1 | 0 | 2 | 2  | #NULL! | 4  | 1  |
| 0 | 0 | 0 | 0  | #NULL! | 0  | 0  |
| 1 | 0 | 1 | 1  | #NULL! | 1  | 0  |
| 0 | 1 | 1 | 1  | #NULL! | 0  | 0  |
| 1 | 0 | 1 | 1  | #NULL! | 0  | 0  |
| 1 | 1 | 1 | 1  | #NULL! | 0  | 0  |
| 0 | 0 | 0 | 0  | #NULL! | 2  | 1  |
| 0 | 0 | 0 | 0  | #NULL! | 0  | 0  |
| 1 | 0 | 0 | 99 | #NULL! | 2  | 1  |
| 0 | 0 | 0 | 0  | #NULL! | 1  | 0  |
| 0 | 0 | 0 | 0  | #NULL! | 0  | 0  |
| 0 | 0 | 0 | 0  | #NULL! | 0  | 0  |
| 1 | 1 | 1 | 1  | #NULL! | 2  | 1  |
| 0 | 0 | 0 | 0  | #NULL! | 0  | 0  |
| 0 | 0 | 0 | 0  | #NULL! | 0  | 0  |
| 0 | 0 | 0 | 0  | #NULL! | 0  | 4  |
| 0 | 0 | 0 | 0  | #NULL! | 0  | 0  |
| 0 | 0 | 0 | 0  | #NULL! | 0  | 0  |
| 0 | 0 | 1 | 1  | #NULL! | 0  | 0  |
| 2 | 0 | 0 | 2  | #NULL! | 2  | 0  |
| 0 | 0 | 0 | 0  | #NULL! | 0  | 0  |
| 0 | 1 | 1 | 1  | #NULL! | 2  | 1  |
| 0 | 1 | 0 | 1  | #NULL! | 0  | 0  |
| 2 | 2 | 2 | 2  | #NULL! | 2  | 3  |
| 1 | 2 | 2 | 2  | #NULL! | 4  | 2  |
| 0 | 0 | 1 | 1  | #NULL! | 2  | 1  |
| 0 | 0 | 0 | 0  | #NULL! | 0  | 1  |
| 0 | 0 | 1 | 0  | #NULL! | 1  | 0  |
| 1 | 1 | 1 | 1  | #NULL! | 2  | 3  |
| 0 | 0 | 1 | 0  | #NULL! | 2  | 0  |
| 0 | 0 | 0 | 0  | #NULL! | 0  | 0  |
| 1 | 0 | 1 | 1  | #NULL! | 4  | 3  |
| 0 | 0 | 0 | 0  | #NULL! | 0  | 0  |
| 0 | 0 | 0 | 0  | #NULL! | 0  | 0  |
| 1 | 1 | 1 | 1  | #NULL! | 0  | 0  |
| 0 | 1 | 1 | 1  | #NULL! | 2  | 1  |
| 0 | 0 | 1 | 0  | #NULL! | 2  | 2  |



|   |   |   |   |        |   |   |
|---|---|---|---|--------|---|---|
| 0 | 0 | 0 | 0 | #NULL! | 0 | 0 |
| 0 | 0 | 0 | 0 | #NULL! | 1 | 0 |
| 0 | 0 | 0 | 0 | #NULL! | 0 | 0 |
| 0 | 0 | 1 | 0 | #NULL! | 3 | 3 |
| 0 | 0 | 0 | 0 | #NULL! | 0 | 0 |
| 0 | 0 | 0 | 0 | #NULL! | 1 | 1 |
| 0 | 0 | 0 | 0 | #NULL! | 2 | 3 |
| 0 | 0 | 1 | 0 | #NULL! | 3 | 2 |
| 1 | 0 | 0 | 0 | #NULL! | 4 | 1 |
| 1 | 0 | 0 | 0 | #NULL! | 1 | 0 |
| 0 | 0 | 0 | 0 | #NULL! | 4 | 2 |
| 0 | 0 | 0 | 0 | #NULL! | 1 | 0 |
| 0 | 0 | 1 | 0 | #NULL! | 1 | 4 |
| 1 | 1 | 2 | 2 | #NULL! | 2 | 3 |
| 0 | 0 | 0 | 0 | #NULL! | 1 | 1 |
| 0 | 0 | 0 | 0 | #NULL! | 2 | 1 |
| 0 | 0 | 1 | 1 | #NULL! | 3 | 3 |
| 0 | 0 | 0 | 0 | #NULL! | 0 | 0 |
| 1 | 1 | 2 | 2 | #NULL! | 3 | 0 |
| 0 | 0 | 0 | 0 | #NULL! | 4 | 2 |
| 0 | 0 | 1 | 0 | #NULL! | 2 | 2 |
| 0 | 0 | 0 | 0 | #NULL! | 2 | 2 |
| 0 | 0 | 1 | 0 | #NULL! | 1 | 0 |
| 0 | 0 | 0 | 1 | #NULL! | 4 | 1 |
| 0 | 0 | 0 | 0 | #NULL! | 1 | 0 |
| 0 | 0 | 1 | 0 | #NULL! | 1 | 1 |
| 0 | 0 | 0 | 1 | #NULL! | 4 | 2 |
| 0 | 0 | 0 | 0 | #NULL! | 1 | 0 |
| 0 | 0 | 0 | 0 | #NULL! | 2 | 1 |
| 0 | 0 | 1 | 1 | #NULL! | 1 | 1 |
| 0 | 0 | 1 | 0 | #NULL! | 1 | 1 |
| 0 | 0 | 0 | 0 | #NULL! | 1 | 0 |
| 0 | 0 | 0 | 0 | #NULL! | 4 | 2 |
| 0 | 0 | 1 | 0 | #NULL! | 0 | 0 |
| 0 | 0 | 0 | 0 | #NULL! | 1 | 0 |
| 0 | 0 | 0 | 0 | #NULL! | 1 | 1 |
| 0 | 0 | 0 | 0 | #NULL! | 1 | 4 |
| 0 | 0 | 0 | 0 | #NULL! | 1 | 0 |
| 0 | 0 | 0 | 0 | #NULL! | 1 | 0 |
| 0 | 0 | 0 | 0 | #NULL! | 0 | 0 |
| 0 | 1 | 0 | 0 | #NULL! | 4 | 0 |
| 0 | 0 | 1 | 0 | #NULL! | 0 | 1 |
| 0 | 0 | 1 | 0 | #NULL! | 0 | 0 |
| 1 | 0 | 2 | 2 | #NULL! | 2 | 0 |
| 0 | 0 | 2 | 0 | #NULL! | 0 | 1 |
| 0 | 0 | 0 | 0 | #NULL! | 3 | 3 |
| 0 | 0 | 0 | 0 | #NULL! | 0 | 0 |
| 1 | 2 | 2 | 0 | #NULL! | 2 | 1 |

|    |    |    |    |        |   |    |
|----|----|----|----|--------|---|----|
| 0  | 0  | 1  | 0  | #NULL! | 1 | 0  |
| 1  | 0  | 0  | 2  | #NULL! | 1 | 0  |
| 1  | 1  | 1  | 1  | #NULL! | 1 | 1  |
| 0  | 1  | 1  | 1  | #NULL! | 4 | 1  |
| 0  | 0  | 0  | 0  | #NULL! | 0 | 0  |
| 0  | 1  | 2  | 2  | #NULL! | 0 | 0  |
| 0  | 0  | 0  | 1  | #NULL! | 1 | 0  |
| 1  | 0  | 0  | 0  | #NULL! | 1 | 1  |
| 0  | 0  | 0  | 0  | #NULL! | 0 | 0  |
| 0  | 1  | 1  | 1  | #NULL! | 2 | 99 |
| 1  | 0  | 0  | 0  | #NULL! | 2 | 3  |
| 0  | 0  | 0  | 0  | #NULL! | 0 | 0  |
| 0  | 0  | 1  | 1  | #NULL! | 1 | 1  |
| 1  | 1  | 2  | 1  | #NULL! | 2 | 1  |
| 0  | 0  | 0  | 0  | #NULL! | 0 | 0  |
| 2  | 2  | 2  | 2  | #NULL! | 0 | 1  |
| 0  | 0  | 1  | 0  | #NULL! | 1 | 0  |
| 0  | 0  | 2  | 0  | #NULL! | 2 | 0  |
| 1  | 0  | 0  | 1  | #NULL! | 4 | 2  |
| 1  | 0  | 1  | 0  | #NULL! | 0 | 0  |
| 0  | 2  | 2  | 2  | #NULL! | 4 | 3  |
| 0  | 1  | 1  | 1  | #NULL! | 0 | 0  |
| 0  | 0  | 0  | 0  | #NULL! | 0 | 0  |
| 0  | 0  | 1  | 0  | #NULL! | 2 | 1  |
| 1  | 0  | 1  | 1  | #NULL! | 2 | 3  |
| 99 | 99 | 99 | 99 | #NULL! | 0 | 0  |
| 1  | 2  | 2  | 2  | #NULL! | 3 | 4  |
| 0  | 0  | 0  | 0  | #NULL! | 2 | 2  |
| 0  | 0  | 1  | 2  | #NULL! | 4 | 2  |
| 0  | 0  | 0  | 0  | #NULL! | 0 | 1  |
| 1  | 0  | 2  | 2  | #NULL! | 2 | 1  |
| 0  | 0  | 0  | 0  | #NULL! | 0 | 0  |
| 0  | 0  | 0  | 0  | #NULL! | 2 | 0  |
| 1  | 0  | 0  | 1  | #NULL! | 2 | 0  |
| 0  | 0  | 2  | 2  | #NULL! | 0 | 0  |
| 0  | 0  | 1  | 0  | #NULL! | 0 | 0  |
| 0  | 1  | 1  | 1  | #NULL! | 2 | 0  |
| 0  | 2  | 2  | 2  | #NULL! | 2 | 2  |
| 0  | 0  | 0  | 0  | #NULL! | 0 | 0  |
| 0  | 0  | 1  | 1  | #NULL! | 1 | 1  |
| 0  | 0  | 2  | 0  | #NULL! | 4 | 2  |
| 1  | 1  | 1  | 1  | #NULL! | 0 | 0  |
| 0  | 0  | 1  | 1  | #NULL! | 1 | 1  |
| 2  | 0  | 2  | 2  | #NULL! | 0 | 2  |
| 0  | 0  | 0  | 1  | #NULL! | 0 | 0  |
| 1  | 1  | 1  | 1  | #NULL! | 0 | 0  |
| 0  | 0  | 2  | 1  | #NULL! | 1 | 1  |
| 0  | 0  | 1  | 1  | #NULL! | 4 | 1  |

|   |   |   |   |        |   |   |
|---|---|---|---|--------|---|---|
| 0 | 0 | 1 | 0 | #NULL! | 1 | 0 |
| 0 | 0 | 1 | 1 | #NULL! | 2 | 1 |
| 0 | 0 | 1 | 0 | #NULL! | 2 | 0 |
| 0 | 1 | 2 | 2 | #NULL! | 0 | 0 |
| 0 | 0 | 1 | 0 | #NULL! | 0 | 0 |
| 0 | 0 | 0 | 0 | #NULL! | 0 | 0 |
| 0 | 0 | 2 | 2 | #NULL! | 2 | 1 |
| 1 | 0 | 1 | 1 | #NULL! | 0 | 0 |
| 1 | 0 | 1 | 2 | #NULL! | 4 | 2 |
| 0 | 0 | 1 | 1 | #NULL! | 1 | 1 |
| 0 | 0 | 2 | 2 | #NULL! | 0 | 0 |
| 0 | 1 | 0 | 1 | #NULL! | 0 | 1 |
| 0 | 0 | 0 | 0 | #NULL! | 0 | 0 |
| 1 | 2 | 2 | 2 | #NULL! | 0 | 0 |
| 0 | 0 | 2 | 2 | #NULL! | 2 | 0 |
| 0 | 0 | 1 | 1 | #NULL! | 2 | 3 |
| 0 | 0 | 0 | 0 | #NULL! | 0 | 0 |
| 0 | 0 | 0 | 0 | #NULL! | 0 | 0 |
| 0 | 0 | 2 | 0 | #NULL! | 4 | 4 |
| 1 | 0 | 1 | 1 | #NULL! | 2 | 3 |
| 0 | 0 | 0 | 0 | #NULL! | 1 | 0 |
| 0 | 0 | 0 | 1 | #NULL! | 2 | 1 |
| 0 | 0 | 0 | 0 | #NULL! | 2 | 3 |
| 1 | 0 | 2 | 2 | #NULL! | 3 | 3 |
| 0 | 0 | 0 | 0 | #NULL! | 2 | 1 |
| 0 | 0 | 2 | 0 | #NULL! | 3 | 1 |
| 0 | 0 | 1 | 2 | #NULL! | 2 | 0 |
| 0 | 1 | 2 | 2 | #NULL! | 2 | 1 |
| 0 | 0 | 0 | 0 | #NULL! | 0 | 1 |
| 0 | 0 | 0 | 0 | #NULL! | 0 | 1 |
| 0 | 0 | 1 | 0 | #NULL! | 0 | 0 |
| 0 | 0 | 1 | 1 | #NULL! | 2 | 1 |
| 0 | 1 | 1 | 1 | #NULL! | 4 | 0 |
| 0 | 0 | 1 | 0 | #NULL! | 2 | 0 |
| 1 | 0 | 2 | 2 | #NULL! | 3 | 1 |
| 0 | 0 | 1 | 2 | #NULL! | 3 | 2 |
| 0 | 0 | 1 | 0 | #NULL! | 2 | 1 |
| 0 | 0 | 0 | 0 | #NULL! | 0 | 0 |
| 0 | 0 | 2 | 2 | #NULL! | 3 | 4 |
| 0 | 0 | 0 | 1 | #NULL! | 3 | 2 |
| 1 | 1 | 1 | 1 | #NULL! | 1 | 0 |
| 0 | 0 | 0 | 0 | #NULL! | 1 | 0 |
| 0 | 0 | 1 | 2 | #NULL! | 0 | 0 |
| 0 | 0 | 0 | 0 | #NULL! | 2 | 2 |
| 0 | 0 | 0 | 0 | #NULL! | 1 | 0 |
| 0 | 0 | 0 | 0 | #NULL! | 1 | 0 |
| 0 | 0 | 1 | 0 | #NULL! | 2 | 4 |
| 0 | 0 | 0 | 0 | #NULL! | 4 | 0 |

|    |    |    |    |        |    |    |
|----|----|----|----|--------|----|----|
| 1  | 1  | 1  | 1  | #NULL! | 1  | 0  |
| 0  | 0  | 2  | 1  | #NULL! | 1  | 0  |
| 0  | 0  | 0  | 2  | #NULL! | 0  | 0  |
| 99 | 99 | 99 | 99 | #NULL! | 99 | 99 |
| 1  | 0  | 1  | 1  | #NULL! | 0  | 1  |
| 0  | 0  | 1  | 0  | #NULL! | 2  | 1  |
| 0  | 0  | 1  | 0  | #NULL! | 1  | 0  |
| 0  | 0  | 1  | 0  | #NULL! | 1  | 3  |
| 0  | 0  | 0  | 0  | #NULL! | 0  | 0  |
| 0  | 0  | 0  | 0  | #NULL! | 2  | 2  |
| 0  | 0  | 0  | 0  | #NULL! | 0  | 0  |
| 0  | 0  | 0  | 0  | #NULL! | 1  | 1  |
| 2  | 1  | 2  | 2  | #NULL! | 99 | 99 |
| 0  | 0  | 0  | 0  | #NULL! | 1  | 2  |
| 0  | 1  | 2  | 2  | #NULL! | 2  | 4  |
| 0  | 0  | 2  | 2  | #NULL! | 1  | 0  |
| 0  | 0  | 1  | 0  | #NULL! | 0  | 0  |
| 1  | 0  | 2  | 0  | #NULL! | 3  | 2  |
| 0  | 0  | 2  | 2  | #NULL! | 1  | 0  |
| 1  | 0  | 1  | 0  | #NULL! | 1  | 1  |
| 0  | 0  | 2  | 0  | #NULL! | 0  | 0  |
| 0  | 0  | 1  | 0  | #NULL! | 2  | 1  |
| 0  | 0  | 2  | 2  | #NULL! | 1  | 3  |
| 1  | 0  | 0  | 0  | #NULL! | 1  | 0  |
| 0  | 0  | 1  | 1  | #NULL! | 0  | 0  |
| 0  | 0  | 0  | 0  | #NULL! | 3  | 1  |
| 1  | 0  | 1  | 2  | #NULL! | 4  | 4  |
| 0  | 0  | 1  | 0  | #NULL! | 0  | 0  |
| 2  | 0  | 0  | 2  | #NULL! | 3  | 2  |
| 0  | 0  | 1  | 0  | #NULL! | 1  | 0  |
| 0  | 0  | 0  | 0  | #NULL! | 0  | 0  |
| 0  | 2  | 2  | 0  | #NULL! | 0  | 0  |
| 1  | 0  | 1  | 1  | #NULL! | 2  | 4  |
| 0  | 0  | 0  | 0  | #NULL! | 0  | 0  |
| 1  | 2  | 2  | 2  | #NULL! | 0  | 1  |
| 0  | 0  | 0  | 0  | #NULL! | 4  | 1  |
| 0  | 0  | 0  | 0  | #NULL! | 0  | 0  |
| 0  | 1  | 1  | 0  | #NULL! | 2  | 1  |
| 0  | 0  | 1  | 0  | #NULL! | 1  | 1  |
| 0  | 0  | 0  | 0  | #NULL! | 1  | 1  |
| 0  | 0  | 0  | 0  | #NULL! | 2  | 3  |
| 0  | 0  | 1  | 0  | #NULL! | 0  | 0  |
| 0  | 0  | 2  | 0  | #NULL! | 0  | 0  |
| 0  | 0  | 0  | 0  | #NULL! | 0  | 0  |
| 0  | 0  | 1  | 0  | #NULL! | 1  | 0  |
| 1  | 99 | 2  | 2  | #NULL! | 0  | 2  |
| 0  | 0  | 1  | 1  | #NULL! | 1  | 0  |
| 0  | 0  | 0  | 0  | #NULL! | 2  | 2  |

|    |    |    |    |        |    |    |
|----|----|----|----|--------|----|----|
| 0  | 0  | 0  | 0  | #NULL! | 99 | 99 |
| 0  | 0  | 0  | 0  | #NULL! | 0  | 0  |
| 1  | 0  | 1  | 0  | #NULL! | 0  | 0  |
| 1  | 1  | 1  | 1  | #NULL! | 2  | 2  |
| 0  | 0  | 1  | 0  | #NULL! | 3  | 3  |
| 0  | 0  | 0  | 0  | #NULL! | 0  | 0  |
| 0  | 0  | 2  | 1  | #NULL! | 0  | 0  |
| 1  | 0  | 0  | 0  | #NULL! | 0  | 0  |
| 0  | 0  | 1  | 1  | #NULL! | 0  | 0  |
| 0  | 1  | 1  | 1  | #NULL! | 2  | 2  |
| 0  | 1  | 1  | 1  | #NULL! | 3  | 3  |
| 2  | 2  | 2  | 2  | #NULL! | 0  | 1  |
| 0  | 0  | 2  | 0  | #NULL! | 2  | 0  |
| 0  | 0  | 1  | 1  | #NULL! | 3  | 3  |
| 2  | 0  | 0  | 0  | #NULL! | 2  | 4  |
| 0  | 0  | 1  | 0  | #NULL! | 1  | 0  |
| 99 | 99 | 99 | 99 | #NULL! | 99 | 99 |
| 0  | 0  | 0  | 0  | #NULL! | 1  | 0  |
| 0  | 0  | 0  | 1  | #NULL! | 0  | 0  |
| 0  | 1  | 2  | 1  | #NULL! | 2  | 2  |
| 0  | 1  | 2  | 2  | #NULL! | 0  | 0  |
| 0  | 0  | 0  | 0  | #NULL! | 1  | 1  |
| 0  | 1  | 1  | 0  | #NULL! | 2  | 4  |
| 0  | 1  | 1  | 1  | #NULL! | 0  | 0  |
| 1  | 0  | 2  | 1  | #NULL! | 0  | 0  |
| 0  | 0  | 0  | 0  | #NULL! | 1  | 0  |
| 99 | 99 | 1  | 99 | #NULL! | 99 | 99 |
| 0  | 0  | 0  | 0  | #NULL! | 0  | 0  |
| 0  | 0  | 0  | 1  | #NULL! | 4  | 3  |
| 0  | 0  | 0  | 0  | #NULL! | 0  | 0  |
| 0  | 0  | 1  | 0  | #NULL! | 2  | 0  |
| 99 | 0  | 0  | 0  | #NULL! | 3  | 0  |
| 0  | 0  | 1  | 1  | #NULL! | 99 | 99 |
| 2  | 0  | 2  | 0  | #NULL! | 3  | 2  |
| 0  | 0  | 1  | 0  | #NULL! | 1  | 0  |
| 0  | 0  | 2  | 1  | #NULL! | 3  | 2  |
| 0  | 0  | 0  | 0  | #NULL! | 0  | 0  |
| 0  | 0  | 1  | 1  | #NULL! | 2  | 0  |
| 0  | 0  | 1  | 0  | #NULL! | 1  | 0  |
| 0  | 0  | 0  | 0  | #NULL! | 2  | 0  |
| 0  | 1  | 1  | 1  | #NULL! | 3  | 3  |
| 0  | 0  | 0  | 0  | #NULL! | 1  | 0  |
| 0  | 99 | 99 | 99 | #NULL! | 1  | 0  |
| 0  | 0  | 0  | 0  | #NULL! | 1  | 0  |
| 0  | 0  | 0  | 0  | #NULL! | 0  | 0  |
| 0  | 0  | 0  | 0  | #NULL! | 1  | 0  |
| 0  | 0  | 1  | 0  | #NULL! | 1  | 1  |
| 0  | 0  | 0  | 0  | #NULL! | 3  | 1  |

|    |    |    |    |        |    |    |
|----|----|----|----|--------|----|----|
| 0  | 0  | 2  | 0  | #NULL! | 4  | 1  |
| 1  | 0  | 1  | 1  | #NULL! | 4  | 1  |
| 0  | 0  | 0  | 0  | #NULL! | 0  | 0  |
| 0  | 0  | 0  | 0  | #NULL! | 0  | 0  |
| 1  | 0  | 1  | 1  | #NULL! | 2  | 2  |
| 0  | 0  | 0  | 0  | #NULL! | 2  | 0  |
| 0  | 0  | 0  | 0  | #NULL! | 0  | 0  |
| 0  | 0  | 0  | 0  | #NULL! | 1  | 1  |
| 0  | 0  | 0  | 0  | #NULL! | 1  | 0  |
| 0  | 0  | 1  | 2  | #NULL! | 4  | 4  |
| 1  | 1  | 2  | 2  | #NULL! | 1  | 2  |
| 1  | 1  | 2  | 2  | #NULL! | 1  | 99 |
| 0  | 0  | 0  | 0  | #NULL! | 3  | 1  |
| 0  | 0  | 0  | 0  | #NULL! | 1  | 1  |
| 0  | 0  | 1  | 0  | #NULL! | 0  | 0  |
| 0  | 2  | 2  | 2  | #NULL! | 1  | 0  |
| 0  | 0  | 0  | 1  | #NULL! | 0  | 1  |
| 1  | 0  | 1  | 0  | #NULL! | 0  | 4  |
| 0  | 0  | 0  | 0  | #NULL! | 2  | 1  |
| 0  | 0  | 0  | 0  | #NULL! | 2  | 0  |
| 0  | 0  | 1  | 0  | #NULL! | 1  | 0  |
| 0  | 0  | 0  | 0  | #NULL! | 0  | 0  |
| 0  | 0  | 1  | 0  | #NULL! | 0  | 0  |
| 99 | 99 | 99 | 99 | #NULL! | 99 | 99 |
| 0  | 0  | 0  | 0  | #NULL! | 0  | 1  |
| 0  | 0  | 0  | 0  | #NULL! | 3  | 1  |
| 0  | 0  | 2  | 0  | #NULL! | 2  | 4  |
| 0  | 1  | 1  | 1  | #NULL! | 2  | 2  |
| 0  | 0  | 0  | 0  | #NULL! | 0  | 0  |
| 0  | 0  | 1  | 0  | #NULL! | 0  | 0  |
| 0  | 1  | 99 | 1  | #NULL! | 4  | 2  |
| 99 | 99 | 99 | 99 | #NULL! | 99 | 99 |
| 0  | 0  | 0  | 0  | #NULL! | 0  | 0  |
| 0  | 0  | 1  | 2  | #NULL! | 2  | 2  |
| 0  | 0  | 1  | 0  | #NULL! | 0  | 0  |
| 1  | 0  | 2  | 2  | #NULL! | 2  | 1  |
| 0  | 0  | 0  | 0  | #NULL! | 0  | 0  |
| 0  | 0  | 1  | 0  | #NULL! | 0  | 0  |
| 0  | 0  | 0  | 0  | #NULL! | 0  | 0  |
| 0  | 1  | 2  | 2  | #NULL! | 1  | 0  |
| 0  | 0  | 0  | 1  | #NULL! | 0  | 0  |
| 1  | 0  | 1  | 0  | #NULL! | 4  | 1  |
| 0  | 0  | 0  | 0  | #NULL! | 0  | 0  |
| 1  | 0  | 1  | 1  | #NULL! | 3  | 4  |
| 1  | 0  | 1  | 1  | #NULL! | 0  | 1  |
| 0  | 0  | 0  | 0  | #NULL! | 2  | 2  |
| 0  | 0  | 0  | 1  | #NULL! | 3  | 2  |
| 1  | 1  | 2  | 2  | #NULL! | 1  | 0  |



|    |    |    |    |        |    |    |
|----|----|----|----|--------|----|----|
| 99 | 0  | 0  | 0  | #NULL! | 0  | 0  |
| 0  | 0  | 0  | 1  | #NULL! | 4  | 4  |
| 1  | 1  | 2  | 2  | #NULL! | 2  | 2  |
| 2  | 2  | 2  | 2  | #NULL! | 1  | 0  |
| 0  | 0  | 1  | 1  | #NULL! | 2  | 1  |
| 0  | 0  | 0  | 0  | #NULL! | 4  | 2  |
| 0  | 0  | 0  | 0  | #NULL! | 1  | 1  |
| 0  | 1  | 2  | 0  | #NULL! | 0  | 0  |
| 0  | 0  | 0  | 0  | #NULL! | 1  | 1  |
| 0  | 0  | 0  | 0  | #NULL! | 1  | 1  |
| 0  | 0  | 0  | 1  | #NULL! | 1  | 0  |
| 0  | 1  | 1  | 0  | #NULL! | 2  | 2  |
| 2  | 1  | 2  | 2  | #NULL! | 4  | 4  |
| 0  | 0  | 0  | 0  | #NULL! | 0  | 1  |
| 99 | 99 | 99 | 99 | #NULL! | 0  | 0  |
| 0  | 0  | 1  | 0  | #NULL! | 4  | 0  |
| 0  | 0  | 2  | 1  | #NULL! | 0  | 0  |
| 0  | 0  | 0  | 0  | #NULL! | 4  | 0  |
| 0  | 0  | 0  | 0  | #NULL! | 0  | 0  |
| 99 | 99 | 99 | 99 | #NULL! | 99 | 99 |
| 0  | 0  | 1  | 1  | #NULL! | 0  | 0  |
| 0  | 0  | 1  | 0  | #NULL! | 0  | 1  |
| 0  | 0  | 0  | 0  | #NULL! | 2  | 4  |
| 1  | 0  | 2  | 2  | #NULL! | 3  | 2  |
| 0  | 0  | 1  | 1  | #NULL! | 1  | 0  |
| 0  | 0  | 0  | 0  | #NULL! | 2  | 1  |
| 0  | 1  | 1  | 1  | #NULL! | 1  | 0  |
| 0  | 0  | 0  | 0  | #NULL! | 2  | 2  |
| 0  | 0  | 0  | 0  | #NULL! | 0  | 0  |
| 0  | 0  | 0  | 0  | #NULL! | 2  | 2  |
| 2  | 2  | 2  | 2  | #NULL! | 0  | 0  |
| 0  | 0  | 0  | 0  | #NULL! | 0  | 0  |
| 2  | 0  | 1  | 1  | #NULL! | 3  | 3  |
| 1  | 1  | 1  | 1  | #NULL! | 2  | 0  |
| 2  | 2  | 2  | 2  | #NULL! | 0  | 0  |
| 0  | 0  | 1  | 0  | #NULL! | 4  | 4  |
| 0  | 0  | 1  | 0  | #NULL! | 1  | 3  |
| 0  | 0  | 1  | 1  | #NULL! | 2  | 1  |
| 0  | 0  | 1  | 2  | #NULL! | 0  | 1  |
| 0  | 0  | 0  | 0  | #NULL! | 2  | 0  |
| 0  | 0  | 0  | 0  | #NULL! | 0  | 0  |
| 99 | 1  | 0  | 0  | #NULL! | 1  | 0  |
| 0  | 0  | 0  | 0  | #NULL! | 1  | 0  |
| 0  | 0  | 2  | 2  | #NULL! | 0  | 0  |
| 0  | 0  | 2  | 2  | #NULL! | 0  | 0  |
| 0  | 0  | 1  | 0  | #NULL! | 4  | 4  |
| 0  | 0  | 1  | 0  | #NULL! | 4  | 0  |
| 1  | 2  | 2  | 2  | #NULL! | 3  | 4  |



|    |   |   |   |        |   |    |
|----|---|---|---|--------|---|----|
| 1  | 0 | 2 | 1 | #NULL! | 4 | 4  |
| 0  | 0 | 0 | 0 | #NULL! | 0 | 0  |
| 0  | 0 | 0 | 0 | #NULL! | 1 | 0  |
| 0  | 0 | 0 | 1 | #NULL! | 2 | 2  |
| 0  | 0 | 1 | 1 | #NULL! | 0 | 1  |
| 0  | 0 | 1 | 0 | #NULL! | 4 | 0  |
| 0  | 0 | 0 | 0 | #NULL! | 1 | 0  |
| 0  | 0 | 0 | 0 | #NULL! | 3 | 4  |
| 0  | 0 | 0 | 0 | #NULL! | 0 | 0  |
| 0  | 0 | 2 | 2 | #NULL! | 2 | 0  |
| 99 | 0 | 2 | 2 | #NULL! | 2 | 1  |
| 0  | 2 | 2 | 2 | #NULL! | 1 | 1  |
| 0  | 1 | 0 | 0 | #NULL! | 1 | 0  |
| 0  | 0 | 1 | 0 | #NULL! | 3 | 4  |
| 0  | 0 | 2 | 2 | #NULL! | 1 | 2  |
| 0  | 0 | 1 | 0 | #NULL! | 2 | 2  |
| 0  | 0 | 1 | 0 | #NULL! | 0 | 0  |
| 0  | 0 | 0 | 0 | #NULL! | 2 | 1  |
| 0  | 0 | 1 | 1 | #NULL! | 0 | 0  |
| 0  | 0 | 2 | 1 | #NULL! | 0 | 0  |
| 0  | 0 | 0 | 0 | #NULL! | 1 | 2  |
| 0  | 0 | 0 | 1 | #NULL! | 1 | 0  |
| 0  | 0 | 0 | 0 | #NULL! | 3 | 0  |
| 0  | 0 | 2 | 2 | #NULL! | 2 | 3  |
| 0  | 0 | 1 | 1 | #NULL! | 0 | 0  |
| 0  | 0 | 0 | 0 | #NULL! | 0 | 0  |
| 0  | 0 | 1 | 1 | #NULL! | 0 | 0  |
| 0  | 0 | 0 | 0 | #NULL! | 0 | 0  |
| 0  | 0 | 0 | 0 | #NULL! | 0 | 0  |
| 0  | 0 | 0 | 0 | #NULL! | 3 | 1  |
| 0  | 0 | 1 | 0 | #NULL! | 2 | 99 |
| 0  | 0 | 0 | 0 | #NULL! | 0 | 0  |
| 1  | 0 | 1 | 1 | #NULL! | 0 | 0  |
| 0  | 0 | 0 | 1 | #NULL! | 1 | 1  |
| 0  | 0 | 0 | 1 | #NULL! | 2 | 2  |
| 0  | 0 | 1 | 1 | #NULL! | 2 | 2  |
| 0  | 0 | 2 | 1 | #NULL! | 2 | 3  |
| 0  | 0 | 1 | 0 | #NULL! | 1 | 0  |
| 0  | 0 | 1 | 1 | #NULL! | 2 | 1  |
| 0  | 0 | 1 | 1 | #NULL! | 0 | 0  |
| 1  | 1 | 1 | 1 | #NULL! | 0 | 99 |
| 0  | 0 | 2 | 2 | #NULL! | 4 | 2  |
| 2  | 0 | 2 | 0 | #NULL! | 4 | 4  |
| 1  | 1 | 1 | 1 | #NULL! | 4 | 2  |
| 0  | 0 | 2 | 1 | #NULL! | 2 | 1  |
| 1  | 0 | 2 | 1 | #NULL! | 2 | 0  |
| 0  | 0 | 1 | 0 | #NULL! | 2 | 0  |
| 0  | 1 | 1 | 0 | #NULL! | 4 | 1  |
| 0  | 0 | 0 | 0 | #NULL! | 0 | 0  |

|    |    |    |    |        |    |    |
|----|----|----|----|--------|----|----|
| 2  | 0  | 2  | 2  | #NULL! | 2  | 0  |
| 0  | 0  | 1  | 1  | #NULL! | 2  | 1  |
| 0  | 0  | 1  | 0  | #NULL! | 0  | 0  |
| 0  | 0  | 1  | 1  | #NULL! | 0  | 0  |
| 1  | 0  | 1  | 2  | #NULL! | 4  | 1  |
| 0  | 0  | 1  | 0  | #NULL! | 1  | 0  |
| 0  | 0  | 0  | 0  | #NULL! | 2  | 0  |
| 0  | 0  | 1  | 0  | #NULL! | 0  | 0  |
| 2  | 0  | 2  | 2  | #NULL! | 3  | 0  |
| 0  | 0  | 1  | 1  | #NULL! | 1  | 0  |
| 0  | 0  | 1  | 0  | #NULL! | 0  | 0  |
| 0  | 0  | 0  | 0  | #NULL! | 2  | 4  |
| 0  | 0  | 0  | 0  | #NULL! | 1  | 0  |
| 0  | 0  | 0  | 0  | #NULL! | 0  | 0  |
| 0  | 0  | 0  | 0  | #NULL! | 3  | 1  |
| 0  | 0  | 0  | 0  | #NULL! | 0  | 0  |
| 0  | 0  | 0  | 0  | #NULL! | 4  | 1  |
| 0  | 0  | 99 | 1  | #NULL! | 1  | 0  |
| 0  | 0  | 0  | 0  | #NULL! | 1  | 1  |
| 0  | 1  | 2  | 2  | #NULL! | 1  | 1  |
| 0  | 1  | 1  | 1  | #NULL! | 2  | 2  |
| 0  | 0  | 0  | 0  | #NULL! | 2  | 1  |
| 1  | 0  | 2  | 1  | #NULL! | 0  | 1  |
| 0  | 1  | 0  | 0  | #NULL! | 4  | 4  |
| 99 | 0  | 0  | 0  | #NULL! | 2  | 0  |
| 0  | 0  | 0  | 0  | #NULL! | 2  | 0  |
| 0  | 0  | 0  | 1  | #NULL! | 2  | 0  |
| 0  | 0  | 0  | 0  | #NULL! | 2  | 1  |
| 0  | 0  | 1  | 0  | #NULL! | 1  | 0  |
| 1  | 0  | 2  | 1  | #NULL! | 4  | 3  |
| 1  | 0  | 1  | 1  | #NULL! | 3  | 3  |
| 0  | 0  | 1  | 0  | #NULL! | 1  | 1  |
| 0  | 0  | 0  | 0  | #NULL! | 4  | 4  |
| 0  | 1  | 1  | 2  | #NULL! | 0  | 1  |
| 1  | 0  | 1  | 1  | #NULL! | 4  | 3  |
| 0  | 0  | 1  | 0  | #NULL! | 2  | 0  |
| 99 | 99 | 99 | 99 | #NULL! | 99 | 99 |
| 0  | 0  | 0  | 0  | #NULL! | 2  | 0  |
| 0  | 0  | 0  | 1  | #NULL! | 1  | 0  |
| 0  | 0  | 0  | 0  | #NULL! | 1  | 0  |
| 0  | 0  | 1  | 0  | #NULL! | 0  | 0  |
| 0  | 0  | 2  | 2  | #NULL! | 3  | 0  |
| 1  | 1  | 2  | 2  | #NULL! | 2  | 0  |
| 1  | 0  | 0  | 0  | #NULL! | 0  | 0  |
| 0  | 0  | 1  | 1  | #NULL! | 3  | 4  |
| 0  | 0  | 2  | 2  | #NULL! | 3  | 2  |
| 0  | 0  | 1  | 0  | #NULL! | 1  | 0  |
| 0  | 0  | 0  | 0  | #NULL! | 1  | 0  |

|   |   |    |   |        |   |    |
|---|---|----|---|--------|---|----|
| 0 | 0 | 0  | 0 | #NULL! | 4 | 4  |
| 0 | 0 | 0  | 1 | #NULL! | 2 | 99 |
| 0 | 0 | 1  | 1 | #NULL! | 2 | 1  |
| 0 | 0 | 0  | 0 | #NULL! | 4 | 1  |
| 0 | 0 | 0  | 0 | #NULL! | 4 | 3  |
| 1 | 0 | 1  | 2 | #NULL! | 2 | 0  |
| 0 | 0 | 1  | 0 | #NULL! | 1 | 0  |
| 0 | 0 | 1  | 1 | #NULL! | 1 | 0  |
| 1 | 1 | 1  | 1 | #NULL! | 0 | 0  |
| 0 | 0 | 99 | 0 | #NULL! | 1 | 0  |
| 1 | 0 | 1  | 0 | #NULL! | 3 | 0  |
| 0 | 0 | 0  | 0 | #NULL! | 0 | 0  |
| 2 | 2 | 2  | 2 | #NULL! | 2 | 2  |
| 0 | 0 | 0  | 0 | #NULL! | 0 | 0  |
| 0 | 0 | 1  | 0 | #NULL! | 2 | 4  |
| 0 | 0 | 0  | 0 | #NULL! | 2 | 0  |
| 0 | 0 | 0  | 0 | #NULL! | 1 | 0  |
| 1 | 0 | 2  | 0 | #NULL! | 3 | 3  |
| 0 | 0 | 0  | 0 | #NULL! | 0 | 1  |
| 0 | 0 | 0  | 1 | #NULL! | 1 | 1  |
| 0 | 0 | 1  | 1 | #NULL! | 0 | 0  |
| 0 | 0 | 1  | 1 | #NULL! | 1 | 0  |
| 0 | 0 | 0  | 0 | #NULL! | 2 | 1  |
| 0 | 0 | 0  | 1 | #NULL! | 2 | 1  |
| 0 | 0 | 0  | 0 | #NULL! | 0 | 0  |
| 0 | 0 | 0  | 1 | #NULL! | 2 | 0  |
| 0 | 0 | 1  | 1 | #NULL! | 2 | 2  |
| 1 | 0 | 1  | 1 | #NULL! | 0 | 0  |
| 1 | 0 | 1  | 0 | #NULL! | 4 | 3  |
| 0 | 0 | 2  | 2 | #NULL! | 2 | 2  |
| 1 | 1 | 1  | 1 | #NULL! | 0 | 0  |
| 0 | 0 | 0  | 1 | #NULL! | 1 | 0  |
| 0 | 0 | 0  | 0 | #NULL! | 0 | 0  |
| 0 | 1 | 1  | 2 | #NULL! | 2 | 3  |
| 0 | 1 | 1  | 1 | #NULL! | 0 | 0  |
| 0 | 1 | 1  | 1 | #NULL! | 2 | 1  |
| 1 | 0 | 1  | 1 | #NULL! | 0 | 2  |
| 1 | 1 | 1  | 1 | #NULL! | 2 | 0  |
| 0 | 0 | 0  | 0 | #NULL! | 0 | 0  |
| 1 | 1 | 1  | 0 | #NULL! | 1 | 0  |
| 0 | 0 | 0  | 0 | #NULL! | 2 | 0  |
| 1 | 0 | 1  | 2 | #NULL! | 4 | 0  |
| 0 | 0 | 0  | 0 | #NULL! | 0 | 0  |
| 0 | 0 | 1  | 0 | #NULL! | 2 | 1  |
| 0 | 0 | 0  | 0 | #NULL! | 0 | 0  |
| 0 | 0 | 1  | 0 | #NULL! | 1 | 0  |
| 0 | 2 | 2  | 2 | #NULL! | 2 | 0  |
| 0 | 0 | 2  | 2 | #NULL! | 2 | 2  |

|    |    |   |    |        |   |   |
|----|----|---|----|--------|---|---|
| 0  | 0  | 0 | 0  | #NULL! | 0 | 0 |
| 0  | 0  | 1 | 1  | #NULL! | 2 | 2 |
| 0  | 0  | 0 | 0  | #NULL! | 0 | 0 |
| 0  | 0  | 1 | 0  | #NULL! | 0 | 0 |
| 0  | 0  | 0 | 0  | #NULL! | 0 | 0 |
| 99 | 0  | 0 | 0  | #NULL! | 0 | 0 |
| 0  | 1  | 2 | 1  | #NULL! | 4 | 3 |
| 0  | 0  | 1 | 1  | #NULL! | 2 | 0 |
| 0  | 0  | 0 | 0  | #NULL! | 0 | 0 |
| 0  | 0  | 1 | 1  | #NULL! | 1 | 0 |
| 0  | 0  | 1 | 1  | #NULL! | 0 | 0 |
| 0  | 0  | 1 | 0  | #NULL! | 0 | 0 |
| 0  | 0  | 0 | 0  | #NULL! | 4 | 1 |
| 0  | 0  | 1 | 0  | #NULL! | 2 | 1 |
| 0  | 0  | 0 | 0  | #NULL! | 3 | 3 |
| 1  | 0  | 1 | 0  | #NULL! | 0 | 0 |
| 0  | 0  | 0 | 0  | #NULL! | 0 | 1 |
| 0  | 0  | 0 | 0  | #NULL! | 2 | 1 |
| 0  | 0  | 0 | 0  | #NULL! | 0 | 0 |
| 0  | 0  | 0 | 0  | #NULL! | 4 | 0 |
| 0  | 0  | 0 | 0  | #NULL! | 1 | 1 |
| 0  | 0  | 0 | 0  | #NULL! | 0 | 1 |
| 0  | 1  | 1 | 0  | #NULL! | 4 | 4 |
| 0  | 0  | 0 | 0  | #NULL! | 4 | 3 |
| 0  | 0  | 1 | 1  | #NULL! | 0 | 0 |
| 0  | 0  | 0 | 0  | #NULL! | 1 | 0 |
| 0  | 0  | 1 | 0  | #NULL! | 1 | 1 |
| 0  | 0  | 0 | 0  | #NULL! | 0 | 0 |
| 0  | 0  | 0 | 0  | #NULL! | 1 | 0 |
| 0  | 0  | 0 | 0  | #NULL! | 1 | 2 |
| 0  | 0  | 0 | 0  | #NULL! | 3 | 2 |
| 0  | 0  | 0 | 0  | #NULL! | 0 | 0 |
| 0  | 0  | 0 | 0  | #NULL! | 0 | 0 |
| 99 | 99 | 1 | 99 | #NULL! | 2 | 0 |
| 0  | 0  | 1 | 1  | #NULL! | 0 | 1 |
| 0  | 0  | 0 | 0  | #NULL! | 2 | 0 |
| 0  | 0  | 0 | 0  | #NULL! | 0 | 1 |
| 0  | 0  | 1 | 0  | #NULL! | 1 | 0 |
| 0  | 0  | 1 | 1  | #NULL! | 0 | 0 |
| 0  | 0  | 0 | 0  | #NULL! | 1 | 2 |
| 1  | 0  | 1 | 0  | #NULL! | 0 | 0 |
| 0  | 0  | 0 | 0  | #NULL! | 0 | 0 |
| 0  | 0  | 0 | 0  | #NULL! | 0 | 0 |
| 0  | 0  | 0 | 0  | #NULL! | 0 | 0 |
| 1  | 1  | 2 | 2  | #NULL! | 2 | 0 |
| 1  | 0  | 1 | 1  | #NULL! | 1 | 0 |
| 0  | 0  | 0 | 0  | #NULL! | 2 | 0 |
| 0  | 0  | 0 | 1  | #NULL! | 0 | 0 |

|    |    |    |    |        |    |    |
|----|----|----|----|--------|----|----|
| 0  | 0  | 0  | 0  | #NULL! | 2  | 0  |
| 1  | 1  | 1  | 1  | #NULL! | 3  | 4  |
| 0  | 0  | 0  | 0  | #NULL! | 1  | 0  |
| 0  | 0  | 0  | 0  | #NULL! | 2  | 0  |
| 0  | 0  | 1  | 1  | #NULL! | 4  | 1  |
| 0  | 1  | 0  | 0  | #NULL! | 99 | 99 |
| 0  | 0  | 0  | 0  | #NULL! | 1  | 0  |
| 0  | 0  | 2  | 1  | #NULL! | 1  | 1  |
| 0  | 0  | 0  | 0  | #NULL! | 1  | 0  |
| 0  | 0  | 0  | 0  | #NULL! | 2  | 0  |
| 0  | 0  | 1  | 1  | #NULL! | 1  | 0  |
| 0  | 0  | 0  | 0  | #NULL! | 2  | 1  |
| 0  | 0  | 1  | 1  | #NULL! | 0  | 0  |
| 2  | 2  | 2  | 2  | #NULL! | 0  | 0  |
| 0  | 0  | 2  | 1  | #NULL! | 0  | 0  |
| 0  | 0  | 0  | 0  | #NULL! | 0  | 1  |
| 0  | 0  | 0  | 0  | #NULL! | 0  | 1  |
| 0  | 0  | 1  | 0  | #NULL! | 0  | 0  |
| 1  | 0  | 2  | 2  | #NULL! | 2  | 0  |
| 0  | 1  | 1  | 1  | #NULL! | 3  | 2  |
| 0  | 1  | 1  | 1  | #NULL! | 0  | 0  |
| 99 | 99 | 99 | 99 | #NULL! | 3  | 4  |
| 0  | 0  | 1  | 1  | #NULL! | 2  | 0  |
| 1  | 0  | 1  | 1  | #NULL! | 3  | 1  |
| 0  | 0  | 1  | 1  | #NULL! | 2  | 0  |
| 0  | 99 | 0  | 99 | #NULL! | 0  | 2  |
| 0  | 0  | 1  | 0  | #NULL! | 0  | 0  |
| 0  | 0  | 1  | 1  | #NULL! | 1  | 0  |
| 2  | 0  | 1  | 1  | #NULL! | 3  | 2  |
| 0  | 0  | 0  | 0  | #NULL! | 2  | 1  |
| 1  | 0  | 1  | 1  | #NULL! | 2  | 1  |
| 0  | 0  | 2  | 0  | #NULL! | 3  | 1  |
| 2  | 1  | 1  | 2  | #NULL! | 1  | 1  |
| 1  | 0  | 2  | 2  | #NULL! | 0  | 0  |
| 0  | 0  | 1  | 1  | #NULL! | 1  | 1  |
| 0  | 0  | 0  | 0  | #NULL! | 1  | 2  |
| 99 | 99 | 99 | 99 | #NULL! | 99 | 99 |
| 0  | 0  | 2  | 2  | #NULL! | 2  | 1  |
| 0  | 0  | 0  | 0  | #NULL! | 2  | 1  |
| 0  | 0  | 1  | 1  | #NULL! | 0  | 0  |
| 0  | 0  | 1  | 1  | #NULL! | 1  | 0  |
| 2  | 2  | 2  | 2  | #NULL! | 1  | 0  |
| 0  | 0  | 1  | 1  | #NULL! | 0  | 0  |
| 0  | 0  | 0  | 0  | #NULL! | 0  | 0  |
| 0  | 0  | 1  | 0  | #NULL! | 1  | 0  |
| 0  | 0  | 0  | 0  | #NULL! | 0  | 0  |
| 0  | 1  | 0  | 0  | #NULL! | 1  | 0  |
| 0  | 0  | 1  | 0  | #NULL! | 1  | 0  |

|    |    |    |    |        |    |    |
|----|----|----|----|--------|----|----|
| 0  | 99 | 0  | 0  | #NULL! | 2  | 3  |
| 0  | 0  | 0  | 0  | #NULL! | 1  | 0  |
| 0  | 0  | 0  | 0  | #NULL! | 0  | 0  |
| 0  | 0  | 1  | 0  | #NULL! | 0  | 0  |
| 0  | 0  | 0  | 0  | #NULL! | 2  | 0  |
| 0  | 0  | 0  | 0  | #NULL! | 0  | 0  |
| 0  | 0  | 0  | 0  | #NULL! | 2  | 2  |
| 0  | 0  | 0  | 0  | #NULL! | 3  | 2  |
| 0  | 0  | 0  | 0  | #NULL! | 0  | 0  |
| 0  | 0  | 0  | 0  | #NULL! | 0  | 0  |
| 0  | 0  | 0  | 0  | #NULL! | 0  | 0  |
| 0  | 0  | 0  | 1  | #NULL! | 1  | 1  |
| 1  | 0  | 1  | 0  | #NULL! | 2  | 0  |
| 0  | 0  | 0  | 0  | #NULL! | 1  | 1  |
| 0  | 0  | 1  | 1  | #NULL! | 2  | 1  |
| 0  | 0  | 0  | 0  | #NULL! | 0  | 1  |
| 1  | 0  | 0  | 1  | #NULL! | 0  | 0  |
| 0  | 0  | 0  | 0  | #NULL! | 1  | 0  |
| 0  | 0  | 1  | 0  | #NULL! | 0  | 1  |
| 0  | 0  | 0  | 0  | #NULL! | 0  | 0  |
| 0  | 0  | 0  | 0  | #NULL! | 0  | 0  |
| 0  | 0  | 0  | 0  | #NULL! | 0  | 0  |
| 99 | 99 | 99 | 99 | #NULL! | 99 | 99 |
| 0  | 0  | 0  | 0  | #NULL! | 0  | 0  |
| 0  | 0  | 0  | 0  | #NULL! | 4  | 4  |
| 0  | 0  | 1  | 0  | #NULL! | 2  | 0  |
| 1  | 1  | 2  | 1  | #NULL! | 0  | 0  |
| 0  | 0  | 1  | 0  | #NULL! | 2  | 1  |
| 0  | 0  | 0  | 0  | #NULL! | 2  | 2  |
| 0  | 0  | 0  | 0  | #NULL! | 0  | 0  |
| 0  | 0  | 0  | 0  | #NULL! | 0  | 0  |
| 0  | 0  | 0  | 0  | #NULL! | 0  | 0  |
| 0  | 0  | 1  | 0  | #NULL! | 1  | 0  |
| 0  | 0  | 0  | 0  | #NULL! | 0  | 0  |
| 0  | 1  | 1  | 2  | #NULL! | 1  | 1  |
| 2  | 0  | 1  | 0  | #NULL! | 3  | 1  |
| 0  | 0  | 0  | 0  | #NULL! | 0  | 0  |
| 99 | 99 | 99 | 99 | #NULL! | 99 | 99 |
| 0  | 0  | 1  | 1  | #NULL! | 2  | 1  |
| 1  | 0  | 2  | 2  | #NULL! | 2  | 0  |
| 0  | 0  | 0  | 0  | #NULL! | 2  | 2  |
| 0  | 0  | 0  | 2  | #NULL! | 2  | 2  |
| 2  | 0  | 1  | 1  | #NULL! | 2  | 2  |
| 0  | 0  | 0  | 0  | #NULL! | 2  | 2  |
| 0  | 0  | 0  | 0  | #NULL! | 0  | 0  |
| 1  | 0  | 2  | 1  | #NULL! | 2  | 0  |
| 0  | 0  | 0  | 0  | #NULL! | 4  | 0  |
| 0  | 0  | 0  | 0  | #NULL! | 3  | 2  |

|    |    |    |    |        |    |    |
|----|----|----|----|--------|----|----|
| 99 | 99 | 99 | 99 | #NULL! | 99 | 99 |
| 0  | 1  | 1  | 1  | #NULL! | 0  | 0  |
| 0  | 0  | 1  | 0  | #NULL! | 1  | 0  |
| 0  | 0  | 0  | 0  | #NULL! | 0  | 99 |
| 0  | 0  | 1  | 0  | #NULL! | 2  | 0  |
| 0  | 0  | 0  | 1  | #NULL! | 0  | 0  |
| 99 | 99 | 1  | 1  | #NULL! | 0  | 0  |
| 0  | 0  | 1  | 1  | #NULL! | 1  | 1  |
| 0  | 0  | 1  | 1  | #NULL! | 1  | 1  |
| 0  | 0  | 1  | 0  | #NULL! | 1  | 0  |
| 0  | 0  | 0  | 0  | #NULL! | 2  | 1  |
| 0  | 0  | 1  | 1  | #NULL! | 1  | 0  |
| 0  | 0  | 1  | 0  | #NULL! | 1  | 0  |
| 0  | 0  | 0  | 0  | #NULL! | 0  | 0  |
| 0  | 1  | 1  | 2  | #NULL! | 1  | 0  |
| 0  | 0  | 1  | 1  | #NULL! | 3  | 3  |
| 0  | 0  | 0  | 0  | #NULL! | 0  | 0  |
| 1  | 0  | 2  | 0  | #NULL! | 4  | 4  |
| 0  | 0  | 0  | 0  | #NULL! | 1  | 1  |
| 2  | 2  | 2  | 2  | #NULL! | 4  | 0  |
| 1  | 0  | 1  | 2  | #NULL! | 1  | 0  |
| 1  | 1  | 1  | 1  | #NULL! | 2  | 2  |
| 99 | 99 | 99 | 99 | #NULL! | 99 | 99 |
| 0  | 0  | 0  | 0  | #NULL! | 0  | 0  |
| 0  | 0  | 1  | 1  | #NULL! | 3  | 3  |
| 0  | 0  | 0  | 1  | #NULL! | 2  | 0  |
| 0  | 0  | 0  | 0  | #NULL! | 2  | 99 |
| 1  | 1  | 2  | 1  | #NULL! | 1  | 0  |
| 0  | 0  | 1  | 0  | #NULL! | 3  | 3  |
| 0  | 0  | 0  | 0  | #NULL! | 0  | 0  |
| 0  | 0  | 0  | 0  | #NULL! | 0  | 0  |
| 1  | 0  | 0  | 0  | #NULL! | 99 | 0  |
| 0  | 0  | 0  | 0  | #NULL! | 4  | 3  |
| 0  | 0  | 1  | 0  | #NULL! | 4  | 4  |
| 1  | 0  | 1  | 1  | #NULL! | 3  | 2  |
| 0  | 0  | 1  | 0  | #NULL! | 0  | 0  |
| 0  | 0  | 0  | 0  | #NULL! | 1  | 1  |
| 99 | 99 | 99 | 99 | #NULL! | 0  | 0  |
| 0  | 0  | 0  | 0  | #NULL! | 0  | 1  |
| 0  | 0  | 2  | 0  | #NULL! | 4  | 4  |
| 1  | 0  | 2  | 2  | #NULL! | 1  | 0  |
| 2  | 2  | 2  | 2  | #NULL! | 2  | 4  |
| 0  | 0  | 1  | 1  | #NULL! | 4  | 3  |
| 0  | 0  | 0  | 0  | #NULL! | 0  | 0  |
| 1  | 1  | 1  | 1  | #NULL! | 3  | 3  |
| 0  | 0  | 0  | 0  | #NULL! | 0  | 0  |
| 99 | 99 | 99 | 99 | #NULL! | 99 | 99 |
| 2  | 1  | 2  | 2  | #NULL! | 1  | 0  |

|    |    |    |    |        |    |    |
|----|----|----|----|--------|----|----|
| 0  | 0  | 0  | 0  | #NULL! | 4  | 4  |
| 0  | 2  | 2  | 2  | #NULL! | 4  | 2  |
| 0  | 0  | 0  | 0  | #NULL! | 1  | 1  |
| 1  | 0  | 1  | 0  | #NULL! | 0  | 4  |
| 0  | 0  | 1  | 0  | #NULL! | 4  | 3  |
| 0  | 0  | 0  | 0  | #NULL! | 0  | 0  |
| 1  | 0  | 0  | 0  | #NULL! | 0  | 0  |
| 0  | 0  | 0  | 0  | #NULL! | 3  | 0  |
| 0  | 1  | 1  | 99 | #NULL! | 2  | 1  |
| 0  | 0  | 2  | 0  | #NULL! | 4  | 1  |
| 0  | 0  | 1  | 1  | #NULL! | 2  | 1  |
| 0  | 0  | 0  | 0  | #NULL! | 0  | 0  |
| 0  | 0  | 0  | 0  | #NULL! | 1  | 1  |
| 0  | 0  | 0  | 0  | #NULL! | 0  | 0  |
| 0  | 0  | 1  | 1  | #NULL! | 1  | 0  |
| 0  | 0  | 0  | 0  | #NULL! | 4  | 2  |
| 0  | 0  | 1  | 1  | #NULL! | 0  | 0  |
| 0  | 0  | 0  | 0  | #NULL! | 2  | 0  |
| 0  | 0  | 0  | 0  | #NULL! | 0  | 0  |
| 0  | 0  | 0  | 0  | #NULL! | 2  | 2  |
| 0  | 0  | 1  | 1  | #NULL! | 1  | 0  |
| 0  | 0  | 0  | 0  | #NULL! | 0  | 2  |
| 0  | 0  | 1  | 0  | #NULL! | 1  | 0  |
| 0  | 0  | 0  | 0  | #NULL! | 0  | 0  |
| 0  | 0  | 0  | 0  | #NULL! | 4  | 3  |
| 1  | 1  | 2  | 1  | #NULL! | 1  | 1  |
| 0  | 0  | 0  | 0  | #NULL! | 0  | 0  |
| 0  | 0  | 1  | 0  | #NULL! | 0  | 0  |
| 1  | 0  | 2  | 2  | #NULL! | 0  | 0  |
| 0  | 0  | 0  | 0  | #NULL! | 0  | 0  |
| 0  | 0  | 1  | 1  | #NULL! | 1  | 1  |
| 0  | 0  | 0  | 1  | #NULL! | 0  | 0  |
| 0  | 0  | 1  | 1  | #NULL! | 2  | 1  |
| 0  | 0  | 1  | 0  | #NULL! | 2  | 0  |
| 0  | 0  | 1  | 0  | #NULL! | 2  | 1  |
| 0  | 0  | 0  | 0  | #NULL! | 0  | 3  |
| 0  | 0  | 0  | 0  | #NULL! | 1  | 99 |
| 1  | 0  | 1  | 1  | #NULL! | 0  | 0  |
| 99 | 99 | 99 | 99 | #NULL! | 99 | 99 |
| 0  | 0  | 0  | 0  | #NULL! | 0  | 0  |
| 0  | 0  | 0  | 0  | #NULL! | 0  | 0  |
| 0  | 0  | 1  | 1  | #NULL! | 3  | 2  |
| 0  | 0  | 0  | 1  | #NULL! | 0  | 0  |
| 0  | 0  | 0  | 0  | #NULL! | 0  | 0  |
| 0  | 0  | 0  | 0  | #NULL! | 0  | 0  |
| 0  | 0  | 0  | 0  | #NULL! | 0  | 0  |
| 0  | 0  | 0  | 0  | #NULL! | 0  | 0  |
| 1  | 0  | 2  | 1  | #NULL! | 2  | 0  |
| 0  | 1  | 0  | 0  | #NULL! | 1  | 0  |



|    |    |    |    |        |    |    |
|----|----|----|----|--------|----|----|
| 0  | 1  | 2  | 2  | #NULL! | 0  | 2  |
| 1  | 0  | 0  | 0  | #NULL! | 1  | 1  |
| 0  | 1  | 1  | 1  | #NULL! | 2  | 0  |
| 0  | 0  | 2  | 1  | #NULL! | 0  | 0  |
| 2  | 99 | 0  | 1  | #NULL! | 2  | 1  |
| 0  | 0  | 0  | 0  | #NULL! | 1  | 1  |
| 0  | 0  | 1  | 1  | #NULL! | 2  | 1  |
| 0  | 0  | 0  | 0  | #NULL! | 4  | 1  |
| 0  | 0  | 0  | 0  | #NULL! | 0  | 0  |
| 0  | 0  | 1  | 1  | #NULL! | 0  | 0  |
| 0  | 0  | 0  | 0  | #NULL! | 4  | 4  |
| 0  | 1  | 1  | 1  | #NULL! | 0  | 1  |
| 0  | 1  | 1  | 0  | #NULL! | 2  | 1  |
| 0  | 0  | 1  | 1  | #NULL! | 1  | 1  |
| 0  | 1  | 1  | 1  | #NULL! | 0  | 0  |
| 0  | 0  | 2  | 1  | #NULL! | 4  | 3  |
| 0  | 0  | 0  | 0  | #NULL! | 0  | 0  |
| 1  | 0  | 1  | 0  | #NULL! | 3  | 2  |
| 1  | 0  | 1  | 1  | #NULL! | 2  | 3  |
| 1  | 1  | 1  | 1  | #NULL! | 0  | 0  |
| 0  | 0  | 1  | 0  | #NULL! | 3  | 4  |
| 0  | 0  | 1  | 2  | #NULL! | 2  | 0  |
| 0  | 0  | 1  | 0  | #NULL! | 0  | 0  |
| 0  | 2  | 1  | 2  | #NULL! | 0  | 0  |
| 0  | 0  | 1  | 1  | #NULL! | 1  | 1  |
| 0  | 1  | 1  | 1  | #NULL! | 1  | 0  |
| 0  | 0  | 1  | 0  | #NULL! | 99 | 99 |
| 1  | 0  | 1  | 2  | #NULL! | 4  | 4  |
| 2  | 0  | 2  | 2  | #NULL! | 2  | 2  |
| 99 | 99 | 99 | 99 | #NULL! | 2  | 2  |
| 99 | 0  | 2  | 1  | #NULL! | 1  | 1  |
| 0  | 0  | 1  | 0  | #NULL! | 3  | 0  |
| 1  | 0  | 2  | 0  | #NULL! | 0  | 0  |
| 0  | 0  | 0  | 0  | #NULL! | 1  | 0  |
| 0  | 0  | 0  | 0  | #NULL! | 1  | 1  |
| 0  | 0  | 0  | 0  | #NULL! | 0  | 0  |
| 0  | 0  | 0  | 0  | #NULL! | 1  | 4  |
| 0  | 0  | 2  | 0  | #NULL! | 0  | 1  |
| 0  | 0  | 0  | 0  | #NULL! | 1  | 0  |
| 0  | 0  | 2  | 1  | #NULL! | 1  | 0  |
| 0  | 0  | 2  | 2  | #NULL! | 1  | 1  |
| 99 | 99 | 2  | 99 | #NULL! | 99 | 99 |
| 1  | 99 | 1  | 99 | #NULL! | 0  | 0  |
| 0  | 0  | 1  | 1  | #NULL! | 0  | 0  |
| 0  | 0  | 1  | 2  | #NULL! | 0  | 0  |
| 1  | 0  | 1  | 0  | #NULL! | 2  | 1  |
| 1  | 1  | 1  | 1  | #NULL! | 2  | 1  |
| 0  | 0  | 0  | 1  | #NULL! | 2  | 2  |

|   |   |   |   |        |    |    |
|---|---|---|---|--------|----|----|
| 0 | 0 | 1 | 0 | #NULL! | 0  | 0  |
| 0 | 0 | 2 | 2 | #NULL! | 3  | 2  |
| 0 | 0 | 1 | 0 | #NULL! | 0  | 0  |
| 0 | 0 | 1 | 1 | #NULL! | 2  | 0  |
| 0 | 0 | 0 | 0 | #NULL! | 1  | 0  |
| 0 | 0 | 1 | 1 | #NULL! | 1  | 1  |
| 1 | 0 | 0 | 0 | #NULL! | 0  | 0  |
| 0 | 0 | 0 | 1 | #NULL! | 4  | 4  |
| 0 | 0 | 0 | 0 | #NULL! | 0  | 0  |
| 0 | 0 | 1 | 0 | #NULL! | 1  | 0  |
| 0 | 0 | 1 | 0 | #NULL! | 2  | 1  |
| 0 | 0 | 0 | 0 | #NULL! | 0  | 0  |
| 0 | 0 | 1 | 0 | #NULL! | 2  | 1  |
| 0 | 0 | 2 | 1 | #NULL! | 2  | 2  |
| 0 | 0 | 0 | 1 | #NULL! | 0  | 0  |
| 0 | 0 | 0 | 1 | #NULL! | 2  | 2  |
| 0 | 0 | 0 | 0 | #NULL! | 0  | 1  |
| 1 | 1 | 1 | 1 | #NULL! | 1  | 3  |
| 0 | 0 | 0 | 0 | #NULL! | 0  | 0  |
| 0 | 0 | 1 | 1 | #NULL! | 3  | 4  |
| 2 | 1 | 1 | 2 | #NULL! | 0  | 1  |
| 0 | 0 | 2 | 1 | #NULL! | 3  | 1  |
| 0 | 0 | 1 | 0 | #NULL! | 4  | 2  |
| 0 | 0 | 1 | 2 | #NULL! | 0  | 0  |
| 0 | 0 | 0 | 0 | #NULL! | 2  | 1  |
| 0 | 0 | 0 | 0 | #NULL! | 2  | 0  |
| 0 | 0 | 1 | 0 | #NULL! | 0  | 0  |
| 0 | 0 | 0 | 0 | #NULL! | 1  | 0  |
| 0 | 0 | 0 | 0 | #NULL! | 0  | 0  |
| 0 | 0 | 1 | 0 | #NULL! | 3  | 2  |
| 0 | 1 | 1 | 2 | #NULL! | 2  | 0  |
| 0 | 0 | 1 | 0 | #NULL! | 0  | 1  |
| 1 | 0 | 2 | 1 | #NULL! | 0  | 0  |
| 0 | 0 | 1 | 0 | #NULL! | 2  | 0  |
| 0 | 0 | 1 | 0 | #NULL! | 0  | 0  |
| 0 | 0 | 0 | 0 | #NULL! | 1  | 0  |
| 2 | 1 | 2 | 1 | #NULL! | 1  | 0  |
| 1 | 0 | 1 | 2 | #NULL! | 1  | 1  |
| 0 | 0 | 1 | 0 | #NULL! | 99 | 99 |
| 0 | 1 | 1 | 2 | #NULL! | 0  | 0  |
| 0 | 0 | 0 | 2 | #NULL! | 1  | 0  |
| 0 | 0 | 2 | 0 | #NULL! | 3  | 3  |
| 0 | 0 | 0 | 0 | #NULL! | 3  | 2  |
| 0 | 0 | 1 | 1 | #NULL! | 3  | 4  |
| 0 | 0 | 0 | 0 | #NULL! | 1  | 0  |
| 0 | 0 | 2 | 1 | #NULL! | 2  | 2  |
| 2 | 1 | 2 | 2 | #NULL! | 0  | 0  |
| 1 | 0 | 2 | 1 | #NULL! | 3  | 3  |

|    |    |    |    |        |   |    |
|----|----|----|----|--------|---|----|
| 1  | 0  | 2  | 1  | #NULL! | 4 | 2  |
| 0  | 0  | 2  | 0  | #NULL! | 4 | 4  |
| 0  | 0  | 1  | 0  | #NULL! | 1 | 3  |
| 1  | 0  | 2  | 2  | #NULL! | 3 | 2  |
| 1  | 1  | 1  | 1  | #NULL! | 2 | 1  |
| 2  | 0  | 2  | 0  | #NULL! | 2 | 0  |
| 0  | 0  | 1  | 1  | #NULL! | 1 | 0  |
| 2  | 2  | 0  | 2  | #NULL! | 2 | 2  |
| 1  | 0  | 1  | 1  | #NULL! | 2 | 2  |
| 0  | 0  | 0  | 1  | #NULL! | 0 | 0  |
| 0  | 0  | 1  | 1  | #NULL! | 2 | 0  |
| 0  | 0  | 0  | 0  | #NULL! | 2 | 1  |
| 1  | 0  | 1  | 1  | #NULL! | 1 | 0  |
| 0  | 1  | 2  | 1  | #NULL! | 1 | 0  |
| 1  | 1  | 1  | 2  | #NULL! | 2 | 3  |
| 0  | 1  | 2  | 1  | #NULL! | 4 | 3  |
| 0  | 1  | 2  | 0  | #NULL! | 3 | 2  |
| 0  | 0  | 0  | 0  | #NULL! | 0 | 0  |
| 99 | 99 | 99 | 2  | #NULL! | 1 | 99 |
| 0  | 1  | 1  | 0  | #NULL! | 1 | 1  |
| 0  | 0  | 1  | 0  | #NULL! | 0 | 1  |
| 1  | 0  | 2  | 0  | #NULL! | 2 | 2  |
| 0  | 0  | 0  | 0  | #NULL! | 0 | 1  |
| 0  | 0  | 0  | 0  | #NULL! | 0 | 0  |
| 0  | 0  | 0  | 0  | #NULL! | 0 | 0  |
| 99 | 0  | 0  | 0  | #NULL! | 0 | 0  |
| 0  | 0  | 1  | 2  | #NULL! | 0 | 0  |
| 0  | 0  | 0  | 0  | #NULL! | 1 | 1  |
| 0  | 0  | 0  | 0  | #NULL! | 2 | 1  |
| 2  | 2  | 2  | 2  | #NULL! | 4 | 4  |
| 0  | 0  | 0  | 0  | #NULL! | 0 | 0  |
| 0  | 0  | 0  | 0  | #NULL! | 0 | 1  |
| 0  | 0  | 0  | 0  | #NULL! | 0 | 0  |
| 0  | 0  | 0  | 0  | #NULL! | 0 | 0  |
| 0  | 0  | 0  | 0  | #NULL! | 0 | 0  |
| 1  | 0  | 1  | 0  | #NULL! | 2 | 1  |
| 0  | 0  | 1  | 2  | #NULL! | 0 | 0  |
| 1  | 1  | 2  | 2  | #NULL! | 0 | 0  |
| 0  | 0  | 0  | 0  | #NULL! | 1 | 0  |
| 0  | 0  | 0  | 0  | #NULL! | 2 | 0  |
| 0  | 0  | 1  | 0  | #NULL! | 0 | 0  |
| 0  | 0  | 0  | 0  | #NULL! | 0 | 0  |
| 0  | 0  | 1  | 0  | #NULL! | 2 | 2  |
| 1  | 0  | 0  | 0  | #NULL! | 1 | 1  |
| 0  | 0  | 0  | 1  | #NULL! | 4 | 2  |
| 0  | 0  | 2  | 99 | #NULL! | 4 | 0  |
| 0  | 0  | 1  | 0  | #NULL! | 0 | 0  |
| 0  | 2  | 0  | 1  | #NULL! | 4 | 4  |

|    |    |    |    |        |    |    |
|----|----|----|----|--------|----|----|
| 0  | 0  | 0  | 2  | #NULL! | 1  | 0  |
| 0  | 0  | 1  | 1  | #NULL! | 0  | 0  |
| 0  | 0  | 0  | 1  | #NULL! | 0  | 0  |
| 0  | 0  | 2  | 0  | #NULL! | 3  | 2  |
| 0  | 1  | 1  | 1  | #NULL! | 0  | 0  |
| 0  | 0  | 1  | 0  | #NULL! | 2  | 2  |
| 0  | 0  | 1  | 0  | #NULL! | 4  | 3  |
| 0  | 0  | 1  | 0  | #NULL! | 2  | 0  |
| 0  | 1  | 2  | 2  | #NULL! | 2  | 0  |
| 0  | 0  | 0  | 0  | #NULL! | 1  | 0  |
| 99 | 99 | 99 | 99 | #NULL! | 99 | 99 |
| 1  | 0  | 2  | 2  | #NULL! | 2  | 2  |
| 0  | 0  | 1  | 0  | #NULL! | 0  | 0  |
| 0  | 0  | 1  | 1  | #NULL! | 2  | 0  |
| 1  | 1  | 1  | 0  | #NULL! | 0  | 0  |
| 0  | 0  | 1  | 0  | #NULL! | 3  | 1  |
| 0  | 0  | 0  | 0  | #NULL! | 2  | 2  |
| 0  | 0  | 0  | 0  | #NULL! | 0  | 0  |
| 0  | 1  | 1  | 2  | #NULL! | 1  | 0  |
| 0  | 0  | 2  | 0  | #NULL! | 3  | 2  |
| 2  | 0  | 1  | 1  | #NULL! | 3  | 2  |
| 0  | 0  | 0  | 0  | #NULL! | 1  | 2  |
| 0  | 0  | 1  | 0  | #NULL! | 0  | 0  |
| 2  | 2  | 2  | 0  | #NULL! | 2  | 2  |
| 0  | 0  | 2  | 1  | #NULL! | 0  | 0  |
| 2  | 2  | 2  | 2  | #NULL! | 2  | 4  |
| 0  | 0  | 0  | 0  | #NULL! | 0  | 0  |
| 0  | 0  | 0  | 0  | #NULL! | 4  | 4  |
| 1  | 0  | 2  | 0  | #NULL! | 4  | 1  |
| 2  | 1  | 2  | 2  | #NULL! | 2  | 0  |
| 0  | 0  | 2  | 0  | #NULL! | 2  | 3  |
| 0  | 0  | 0  | 1  | #NULL! | 4  | 2  |
| 0  | 0  | 0  | 0  | #NULL! | 3  | 2  |
| 0  | 1  | 1  | 2  | #NULL! | 2  | 1  |
| 0  | 0  | 0  | 1  | #NULL! | 2  | 2  |
| 0  | 0  | 2  | 1  | #NULL! | 1  | 0  |
| 0  | 0  | 0  | 2  | #NULL! | 1  | 0  |
| 0  | 0  | 1  | 1  | #NULL! | 1  | 1  |
| 0  | 0  | 1  | 2  | #NULL! | 0  | 0  |
| 0  | 0  | 2  | 0  | #NULL! | 0  | 0  |
| 0  | 0  | 1  | 0  | #NULL! | 0  | 0  |
| 0  | 0  | 0  | 0  | #NULL! | 1  | 0  |
| 1  | 0  | 1  | 1  | #NULL! | 0  | 0  |
| 1  | 0  | 1  | 1  | #NULL! | 2  | 0  |
| 0  | 0  | 1  | 0  | #NULL! | 2  | 1  |
| 0  | 0  | 0  | 0  | #NULL! | 4  | 4  |
| 0  | 0  | 1  | 0  | #NULL! | 1  | 2  |
| 0  | 0  | 0  | 2  | #NULL! | 2  | 1  |

|    |    |    |    |        |   |   |
|----|----|----|----|--------|---|---|
| 0  | 0  | 0  | 0  | #NULL! | 0 | 0 |
| 1  | 0  | 1  | 2  | #NULL! | 1 | 0 |
| 0  | 0  | 0  | 1  | #NULL! | 2 | 2 |
| 0  | 1  | 1  | 1  | #NULL! | 4 | 4 |
| 0  | 2  | 2  | 2  | #NULL! | 4 | 4 |
| 0  | 0  | 1  | 1  | #NULL! | 0 | 0 |
| 0  | 0  | 0  | 0  | #NULL! | 0 | 0 |
| 0  | 1  | 2  | 1  | #NULL! | 0 | 0 |
| 1  | 0  | 1  | 1  | #NULL! | 0 | 0 |
| 0  | 0  | 1  | 1  | #NULL! | 4 | 0 |
| 0  | 0  | 0  | 0  | #NULL! | 3 | 2 |
| 0  | 0  | 2  | 0  | #NULL! | 1 | 1 |
| 0  | 1  | 1  | 2  | #NULL! | 0 | 1 |
| 0  | 0  | 0  | 0  | #NULL! | 1 | 1 |
| 0  | 1  | 1  | 1  | #NULL! | 1 | 2 |
| 0  | 0  | 0  | 1  | #NULL! | 1 | 1 |
| 0  | 0  | 0  | 0  | #NULL! | 0 | 0 |
| 0  | 0  | 1  | 1  | #NULL! | 1 | 1 |
| 0  | 0  | 0  | 0  | #NULL! | 0 | 0 |
| 0  | 0  | 0  | 0  | #NULL! | 0 | 0 |
| 0  | 0  | 0  | 0  | #NULL! | 0 | 0 |
| 0  | 0  | 0  | 0  | #NULL! | 0 | 1 |
| 1  | 0  | 1  | 1  | #NULL! | 2 | 2 |
| 0  | 0  | 1  | 0  | #NULL! | 2 | 2 |
| 99 | 99 | 99 | 99 | #NULL! | 0 | 0 |
| 0  | 0  | 2  | 1  | #NULL! | 2 | 2 |
| 0  | 0  | 1  | 1  | #NULL! | 2 | 1 |
| 0  | 0  | 0  | 1  | #NULL! | 4 | 1 |
| 0  | 0  | 1  | 0  | #NULL! | 1 | 0 |
| 0  | 0  | 0  | 0  | #NULL! | 3 | 2 |
| 0  | 0  | 0  | 0  | #NULL! | 0 | 0 |
| 0  | 0  | 1  | 2  | #NULL! | 2 | 1 |
| 0  | 0  | 2  | 2  | #NULL! | 2 | 0 |
| 0  | 0  | 1  | 0  | #NULL! | 0 | 0 |
| 0  | 0  | 0  | 0  | #NULL! | 3 | 1 |
| 1  | 1  | 2  | 0  | #NULL! | 1 | 0 |
| 0  | 0  | 1  | 1  | #NULL! | 2 | 0 |
| 1  | 0  | 2  | 2  | #NULL! | 4 | 4 |
| 0  | 0  | 0  | 1  | #NULL! | 2 | 1 |
| 0  | 0  | 0  | 0  | #NULL! | 2 | 3 |
| 0  | 0  | 1  | 1  | #NULL! | 1 | 2 |
| 0  | 0  | 0  | 0  | #NULL! | 2 | 0 |
| 0  | 0  | 2  | 2  | #NULL! | 4 | 2 |
| 0  | 0  | 0  | 0  | #NULL! | 0 | 0 |
| 0  | 1  | 1  | 1  | #NULL! | 3 | 1 |
| 0  | 0  | 1  | 0  | #NULL! | 0 | 0 |
| 0  | 1  | 1  | 1  | #NULL! | 2 | 2 |
| 0  | 0  | 1  | 1  | #NULL! | 0 | 0 |
| 2  | 2  | 2  | 2  | #NULL! | 0 | 0 |

|    |    |    |    |        |   |   |
|----|----|----|----|--------|---|---|
| 0  | 0  | 99 | 0  | #NULL! | 2 | 1 |
| 0  | 0  | 1  | 0  | #NULL! | 2 | 1 |
| 0  | 0  | 1  | 0  | #NULL! | 0 | 0 |
| 99 | 99 | 99 | 99 | #NULL! | 2 | 1 |
| 0  | 0  | 0  | 0  | #NULL! | 0 | 0 |
| 0  | 0  | 0  | 0  | #NULL! | 0 | 0 |
| 2  | 2  | 2  | 2  | #NULL! | 2 | 1 |
| 1  | 0  | 1  | 0  | #NULL! | 2 | 4 |
| 0  | 0  | 0  | 0  | #NULL! | 0 | 0 |
| 0  | 1  | 0  | 0  | #NULL! | 2 | 0 |
| 0  | 0  | 1  | 2  | #NULL! | 4 | 3 |
| 0  | 1  | 1  | 1  | #NULL! | 2 | 1 |
| 0  | 0  | 1  | 0  | #NULL! | 0 | 0 |
| 0  | 0  | 0  | 1  | #NULL! | 1 | 0 |
| 0  | 0  | 99 | 0  | #NULL! | 1 | 0 |
| 2  | 2  | 2  | 2  | #NULL! | 1 | 1 |
| 2  | 1  | 2  | 1  | #NULL! | 0 | 0 |
| 1  | 1  | 1  | 1  | #NULL! | 1 | 0 |
| 1  | 1  | 1  | 1  | #NULL! | 1 | 2 |
| 0  | 0  | 1  | 1  | #NULL! | 1 | 4 |
| 1  | 0  | 0  | 1  | #NULL! | 0 | 0 |
| 0  | 0  | 0  | 0  | #NULL! | 0 | 0 |
| 1  | 0  | 0  | 1  | #NULL! | 1 | 1 |
| 1  | 0  | 2  | 1  | #NULL! | 2 | 0 |
| 0  | 0  | 1  | 0  | #NULL! | 3 | 1 |
| 1  | 1  | 2  | 1  | #NULL! | 2 | 2 |
| 1  | 1  | 1  | 2  | #NULL! | 0 | 0 |
| 0  | 1  | 1  | 1  | #NULL! | 0 | 0 |
| 0  | 0  | 1  | 1  | #NULL! | 4 | 4 |
| 0  | 0  | 0  | 0  | #NULL! | 1 | 0 |
| 0  | 0  | 1  | 0  | #NULL! | 3 | 4 |
| 0  | 0  | 1  | 1  | #NULL! | 2 | 1 |
| 0  | 1  | 1  | 1  | #NULL! | 1 | 2 |
| 0  | 0  | 0  | 0  | #NULL! | 2 | 0 |
| 0  | 1  | 2  | 1  | #NULL! | 2 | 1 |
| 0  | 0  | 1  | 1  | #NULL! | 0 | 0 |
| 0  | 2  | 2  | 2  | #NULL! | 0 | 0 |
| 0  | 0  | 0  | 0  | #NULL! | 0 | 0 |
| 0  | 0  | 1  | 0  | #NULL! | 2 | 1 |
| 1  | 1  | 1  | 1  | #NULL! | 1 | 1 |
| 0  | 0  | 0  | 0  | #NULL! | 0 | 0 |
| 0  | 0  | 0  | 0  | #NULL! | 2 | 0 |
| 0  | 1  | 1  | 1  | #NULL! | 2 | 1 |
| 0  | 0  | 0  | 1  | #NULL! | 1 | 0 |
| 0  | 0  | 0  | 0  | #NULL! | 4 | 3 |
| 0  | 0  | 0  | 0  | #NULL! | 1 | 4 |
| 0  | 0  | 0  | 0  | #NULL! | 2 | 4 |
| 1  | 0  | 0  | 1  | #NULL! | 1 | 0 |

|   |   |    |   |        |   |   |
|---|---|----|---|--------|---|---|
| 0 | 0 | 0  | 0 | #NULL! | 1 | 4 |
| 2 | 2 | 0  | 2 | #NULL! | 0 | 0 |
| 0 | 0 | 0  | 0 | #NULL! | 2 | 1 |
| 0 | 0 | 0  | 0 | #NULL! | 0 | 0 |
| 0 | 0 | 0  | 0 | #NULL! | 2 | 1 |
| 0 | 0 | 0  | 0 | #NULL! | 0 | 0 |
| 0 | 0 | 0  | 0 | #NULL! | 0 | 0 |
| 0 | 0 | 0  | 0 | #NULL! | 1 | 0 |
| 0 | 0 | 0  | 0 | #NULL! | 1 | 0 |
| 0 | 0 | 0  | 0 | #NULL! | 3 | 0 |
| 0 | 0 | 0  | 2 | #NULL! | 1 | 0 |
| 0 | 1 | 0  | 1 | #NULL! | 1 | 0 |
| 0 | 0 | 0  | 0 | #NULL! | 1 | 0 |
| 0 | 0 | 0  | 0 | #NULL! | 0 | 0 |
| 0 | 0 | 0  | 0 | #NULL! | 1 | 1 |
| 0 | 1 | 1  | 0 | #NULL! | 2 | 2 |
| 0 | 0 | 1  | 0 | #NULL! | 0 | 0 |
| 0 | 0 | 2  | 0 | #NULL! | 2 | 2 |
| 0 | 0 | 1  | 0 | #NULL! | 2 | 4 |
| 0 | 0 | 1  | 1 | #NULL! | 2 | 0 |
| 0 | 0 | 1  | 0 | #NULL! | 2 | 1 |
| 2 | 0 | 2  | 2 | #NULL! | 4 | 2 |
| 0 | 0 | 1  | 1 | #NULL! | 0 | 0 |
| 0 | 0 | 0  | 0 | #NULL! | 0 | 0 |
| 0 | 0 | 0  | 0 | #NULL! | 0 | 0 |
| 0 | 0 | 0  | 0 | #NULL! | 1 | 0 |
| 0 | 0 | 0  | 1 | #NULL! | 1 | 0 |
| 0 | 0 | 0  | 0 | #NULL! | 0 | 0 |
| 0 | 1 | 0  | 0 | #NULL! | 0 | 0 |
| 0 | 0 | 0  | 0 | #NULL! | 2 | 2 |
| 2 | 0 | 2  | 2 | #NULL! | 4 | 4 |
| 0 | 0 | 0  | 0 | #NULL! | 0 | 1 |
| 0 | 0 | 1  | 1 | #NULL! | 3 | 2 |
| 0 | 0 | 0  | 0 | #NULL! | 3 | 4 |
| 0 | 0 | 1  | 0 | #NULL! | 1 | 0 |
| 0 | 0 | 0  | 0 | #NULL! | 0 | 0 |
| 0 | 0 | 1  | 2 | #NULL! | 0 | 2 |
| 0 | 1 | 1  | 1 | #NULL! | 2 | 2 |
| 0 | 0 | 0  | 0 | #NULL! | 2 | 2 |
| 0 | 0 | 2  | 1 | #NULL! | 0 | 0 |
| 0 | 0 | 0  | 0 | #NULL! | 2 | 0 |
| 0 | 0 | 0  | 0 | #NULL! | 2 | 0 |
| 0 | 0 | 0  | 0 | #NULL! | 4 | 3 |
| 0 | 0 | 1  | 1 | #NULL! | 1 | 1 |
| 0 | 0 | 2  | 1 | #NULL! | 4 | 4 |
| 0 | 1 | 0  | 1 | #NULL! | 0 | 0 |
| 0 | 0 | 0  | 0 | #NULL! | 0 | 0 |
| 0 | 1 | 99 | 1 | #NULL! | 2 | 2 |

|    |    |    |    |        |   |   |
|----|----|----|----|--------|---|---|
| 0  | 0  | 0  | 0  | #NULL! | 2 | 0 |
| 2  | 1  | 2  | 2  | #NULL! | 4 | 4 |
| 0  | 0  | 0  | 0  | #NULL! | 0 | 0 |
| 0  | 0  | 1  | 0  | #NULL! | 1 | 1 |
| 0  | 0  | 1  | 0  | #NULL! | 0 | 0 |
| 0  | 0  | 0  | 0  | #NULL! | 3 | 3 |
| 1  | 0  | 0  | 0  | #NULL! | 3 | 0 |
| 0  | 0  | 1  | 1  | #NULL! | 4 | 3 |
| 1  | 0  | 2  | 1  | #NULL! | 4 | 3 |
| 1  | 1  | 2  | 2  | #NULL! | 1 | 0 |
| 1  | 0  | 2  | 2  | #NULL! | 2 | 3 |
| 0  | 0  | 0  | 0  | #NULL! | 0 | 0 |
| 0  | 0  | 2  | 0  | #NULL! | 3 | 2 |
| 0  | 0  | 0  | 0  | #NULL! | 1 | 1 |
| 2  | 0  | 2  | 2  | #NULL! | 3 | 2 |
| 0  | 1  | 1  | 1  | #NULL! | 0 | 0 |
| 0  | 0  | 0  | 1  | #NULL! | 0 | 0 |
| 0  | 0  | 0  | 0  | #NULL! | 2 | 2 |
| 0  | 0  | 1  | 1  | #NULL! | 1 | 0 |
| 0  | 0  | 0  | 0  | #NULL! | 0 | 1 |
| 0  | 0  | 0  | 0  | #NULL! | 0 | 0 |
| 0  | 0  | 1  | 0  | #NULL! | 2 | 2 |
| 99 | 99 | 2  | 2  | #NULL! | 2 | 1 |
| 0  | 0  | 0  | 0  | #NULL! | 0 | 0 |
| 0  | 0  | 0  | 2  | #NULL! | 0 | 0 |
| 1  | 0  | 1  | 1  | #NULL! | 3 | 2 |
| 0  | 0  | 0  | 0  | #NULL! | 2 | 0 |
| 0  | 0  | 0  | 0  | #NULL! | 0 | 1 |
| 0  | 0  | 1  | 0  | #NULL! | 0 | 0 |
| 0  | 0  | 1  | 1  | #NULL! | 1 | 2 |
| 1  | 1  | 1  | 1  | #NULL! | 1 | 0 |
| 0  | 1  | 1  | 0  | #NULL! | 0 | 0 |
| 0  | 0  | 1  | 0  | #NULL! | 0 | 0 |
| 0  | 0  | 0  | 0  | #NULL! | 3 | 4 |
| 1  | 1  | 1  | 1  | #NULL! | 1 | 0 |
| 0  | 0  | 1  | 1  | #NULL! | 1 | 2 |
| 0  | 0  | 0  | 0  | #NULL! | 0 | 0 |
| 0  | 0  | 0  | 1  | #NULL! | 1 | 0 |
| 0  | 0  | 1  | 0  | #NULL! | 0 | 0 |
| 0  | 0  | 0  | 0  | #NULL! | 0 | 0 |
| 1  | 0  | 1  | 0  | #NULL! | 4 | 3 |
| 99 | 99 | 99 | 99 | #NULL! | 1 | 0 |
| 1  | 0  | 1  | 0  | #NULL! | 3 | 2 |
| 1  | 0  | 2  | 0  | #NULL! | 3 | 2 |
| 0  | 0  | 0  | 0  | #NULL! | 0 | 0 |
| 0  | 0  | 0  | 2  | #NULL! | 2 | 3 |
| 0  | 0  | 1  | 1  | #NULL! | 0 | 0 |
| 1  | 0  | 1  | 0  | #NULL! | 0 | 1 |



|   |   |    |   |        |   |   |
|---|---|----|---|--------|---|---|
| 0 | 1 | 1  | 0 | #NULL! | 4 | 2 |
| 0 | 0 | 2  | 1 | #NULL! | 1 | 0 |
| 0 | 0 | 1  | 2 | #NULL! | 2 | 1 |
| 0 | 0 | 0  | 0 | #NULL! | 3 | 3 |
| 0 | 0 | 0  | 0 | #NULL! | 0 | 1 |
| 1 | 0 | 2  | 2 | #NULL! | 4 | 4 |
| 0 | 0 | 0  | 0 | #NULL! | 0 | 0 |
| 0 | 0 | 0  | 0 | #NULL! | 0 | 0 |
| 0 | 0 | 1  | 1 | #NULL! | 0 | 0 |
| 2 | 2 | 1  | 2 | #NULL! | 0 | 0 |
| 0 | 0 | 0  | 0 | #NULL! | 0 | 0 |
| 0 | 0 | 1  | 0 | #NULL! | 0 | 0 |
| 0 | 0 | 1  | 0 | #NULL! | 0 | 0 |
| 0 | 0 | 0  | 0 | #NULL! | 2 | 1 |
| 0 | 1 | 1  | 1 | #NULL! | 3 | 4 |
| 0 | 0 | 0  | 0 | #NULL! | 1 | 0 |
| 2 | 1 | 2  | 2 | #NULL! | 2 | 0 |
| 0 | 0 | 0  | 0 | #NULL! | 2 | 3 |
| 0 | 0 | 0  | 0 | #NULL! | 0 | 0 |
| 0 | 0 | 1  | 1 | #NULL! | 0 | 0 |
| 0 | 0 | 2  | 1 | #NULL! | 1 | 0 |
| 0 | 0 | 0  | 1 | #NULL! | 2 | 2 |
| 0 | 0 | 0  | 1 | #NULL! | 0 | 0 |
| 0 | 0 | 1  | 1 | #NULL! | 2 | 0 |
| 0 | 0 | 0  | 0 | #NULL! | 2 | 0 |
| 0 | 0 | 1  | 0 | #NULL! | 3 | 1 |
| 0 | 0 | 0  | 0 | #NULL! | 0 | 0 |
| 0 | 1 | 1  | 1 | #NULL! | 2 | 1 |
| 0 | 0 | 1  | 0 | #NULL! | 0 | 0 |
| 0 | 0 | 0  | 0 | #NULL! | 0 | 0 |
| 0 | 0 | 1  | 0 | #NULL! | 1 | 2 |
| 1 | 0 | 1  | 1 | #NULL! | 0 | 0 |
| 0 | 0 | 1  | 0 | #NULL! | 1 | 2 |
| 0 | 0 | 0  | 1 | #NULL! | 3 | 2 |
| 1 | 0 | 2  | 2 | #NULL! | 4 | 3 |
| 0 | 0 | 1  | 1 | #NULL! | 0 | 0 |
| 0 | 0 | 0  | 0 | #NULL! | 0 | 0 |
| 0 | 0 | 0  | 0 | #NULL! | 1 | 1 |
| 0 | 0 | 2  | 2 | #NULL! | 3 | 2 |
| 0 | 0 | 1  | 0 | #NULL! | 0 | 0 |
| 0 | 1 | 99 | 2 | #NULL! | 0 | 0 |
| 0 | 2 | 1  | 2 | #NULL! | 3 | 2 |
| 0 | 0 | 0  | 0 | #NULL! | 1 | 0 |
| 0 | 0 | 1  | 0 | #NULL! | 2 | 1 |
| 0 | 0 | 2  | 2 | #NULL! | 2 | 2 |
| 0 | 2 | 2  | 2 | #NULL! | 0 | 0 |
| 1 | 0 | 1  | 2 | #NULL! | 3 | 1 |
| 1 | 1 | 1  | 1 | #NULL! | 0 | 0 |

|   |   |   |   |        |        |        |        |
|---|---|---|---|--------|--------|--------|--------|
| 0 | 0 | 1 | 0 | #NULL! | 3      | 3      |        |
| 0 | 0 | 1 | 0 | #NULL! | 1      | 0      |        |
| 0 | 0 | 1 | 1 | #NULL! | 2      | 0      |        |
| 0 | 0 | 0 | 0 | 0      | #NULL! | #NULL! |        |
| 0 | 0 | 2 | 1 | 2      | #NULL! | #NULL! |        |
| 0 | 0 | 0 | 0 | 0      | 1      | #NULL! | #NULL! |
| 0 | 0 | 0 | 0 | 0      | 0      | #NULL! | #NULL! |
| 2 | 0 | 1 | 0 | 1      | #NULL! | #NULL! |        |
| 0 | 0 | 2 | 2 | 2      | #NULL! | #NULL! |        |
| 0 | 0 | 2 | 2 | 2      | #NULL! | #NULL! |        |
| 1 | 0 | 1 | 1 | 1      | #NULL! | #NULL! |        |
| 1 | 1 | 2 | 2 | 1      | #NULL! | #NULL! |        |
| 2 | 2 | 2 | 2 | 2      | #NULL! | #NULL! |        |
| 1 | 0 | 1 | 0 | 1      | #NULL! | #NULL! |        |
| 2 | 0 | 1 | 1 | 2      | #NULL! | #NULL! |        |
| 0 | 0 | 1 | 1 | 1      | #NULL! | #NULL! |        |
| 0 | 0 | 1 | 0 | 1      | #NULL! | #NULL! |        |
| 1 | 0 | 2 | 2 | 2      | #NULL! | #NULL! |        |
| 0 | 0 | 1 | 1 | 0      | #NULL! | #NULL! |        |
| 2 | 0 | 2 | 2 | 1      | #NULL! | #NULL! |        |
| 2 | 1 | 2 | 2 | 2      | #NULL! | #NULL! |        |
| 0 | 0 | 2 | 1 | 2      | #NULL! | #NULL! |        |
| 0 | 2 | 2 | 1 | 1      | #NULL! | #NULL! |        |
| 0 | 0 | 0 | 0 | 0      | #NULL! | #NULL! |        |
| 0 | 0 | 0 | 0 | 2      | #NULL! | #NULL! |        |
| 1 | 1 | 1 | 1 | 1      | #NULL! | #NULL! |        |
| 0 | 0 | 1 | 1 | 1      | #NULL! | #NULL! |        |
| 0 | 0 | 0 | 0 | 2      | #NULL! | #NULL! |        |
| 0 | 0 | 1 | 0 | 0      | #NULL! | #NULL! |        |
| 0 | 0 | 0 | 0 | 1      | #NULL! | #NULL! |        |
| 0 | 0 | 0 | 0 | 0      | #NULL! | #NULL! |        |
| 2 | 2 | 2 | 2 | 2      | #NULL! | #NULL! |        |
| 1 | 0 | 2 | 2 | 2      | #NULL! | #NULL! |        |
| 0 | 0 | 1 | 0 | 0      | #NULL! | #NULL! |        |
| 0 | 0 | 2 | 0 | 0      | #NULL! | #NULL! |        |
| 2 | 0 | 2 | 2 | 2      | #NULL! | #NULL! |        |
| 0 | 0 | 0 | 0 | 0      | #NULL! | #NULL! |        |
| 0 | 0 | 0 | 0 | 0      | #NULL! | #NULL! |        |
| 0 | 0 | 1 | 0 | 0      | #NULL! | #NULL! |        |
| 0 | 0 | 0 | 0 | 0      | #NULL! | #NULL! |        |
| 0 | 0 | 0 | 0 | 0      | #NULL! | #NULL! |        |
| 0 | 0 | 0 | 0 | 0      | #NULL! | #NULL! |        |
| 0 | 1 | 1 | 1 | 1      | #NULL! | #NULL! |        |
| 2 | 0 | 2 | 0 | 2      | #NULL! | #NULL! |        |
| 0 | 0 | 0 | 0 | 0      | #NULL! | #NULL! |        |
| 1 | 0 | 0 | 0 | 0      | #NULL! | #NULL! |        |
| 1 | 1 | 1 | 1 | 1      | #NULL! | #NULL! |        |
| 0 | 0 | 0 | 0 | 0      | #NULL! | #NULL! |        |
| 0 | 0 | 0 | 0 | 1      | #NULL! | #NULL! |        |

|        |        |        |        |        |        |        |        |
|--------|--------|--------|--------|--------|--------|--------|--------|
|        | 0      | 0      | 1      | 0      | 0      | #NULL! | #NULL! |
|        | 0      | 0      | 1      | 0      | 0      | #NULL! | #NULL! |
|        | 1      | 0      | 0      | 0      | 1      | #NULL! | #NULL! |
|        | 0      | 0      | 0      | 0      | 2      | #NULL! | #NULL! |
| #NULL! |        | 0      | 1      | 0      | 1      | #NULL! | #NULL! |
|        | 0      | 0      | 0      | 0      | 0      | #NULL! | #NULL! |
|        | 1      | 0      | 1      | 0      | 1      | #NULL! | #NULL! |
|        | 0      | 0      | 0      | 0      | 0      | #NULL! | #NULL! |
|        | 0      | 0      | 0      | 0      | 0      | #NULL! | #NULL! |
|        | 0      | 0      | 1      | 0      | 2      | #NULL! | #NULL! |
|        | 0      | 0      | 0      | 0      | 0      | #NULL! | #NULL! |
|        | 0      | 0      | 0      | 0      | 0      | #NULL! | #NULL! |
| #NULL! | #NULL! | #NULL! | #NULL! | #NULL! | #NULL! | #NULL! | #NULL! |
|        | 0      | 0      | 1      | 0      | 1      | #NULL! | #NULL! |
|        | 1      | 0      | 0      | 0      | 2      | #NULL! | #NULL! |
|        | 0      | 0      | 0      | 0      | 0      | #NULL! | #NULL! |
|        | 0      | 0      | 0      | 0      | 2      | #NULL! | #NULL! |
|        | 0      | 1      | 2      | 2      | 2      | #NULL! | #NULL! |
|        | 0      | 0      | 0      | 0      | 0      | #NULL! | #NULL! |
|        | 0      | 0      | 1      | 0      | 2      | #NULL! | #NULL! |
|        | 0      | 0      | 0      | 0      | 2      | #NULL! | #NULL! |
|        | 1      | 0      | 0      | 0      | 2      | #NULL! | #NULL! |
|        | 0      | 0      | 0      | 0      | 0      | #NULL! | #NULL! |
|        | 0      | 0      | 0      | 0      | 1      | #NULL! | #NULL! |
|        | 0      | 0      | 1      | 0      | 1      | #NULL! | #NULL! |
|        | 0      | 0      | 0      | 0      | 1      | #NULL! | #NULL! |
|        | 2      | 1      | 1      | 1      | 2      | #NULL! | #NULL! |
|        | 0      | 0      | 0      | 0      | 2      | #NULL! | #NULL! |
|        | 0      | 0      | 0      | 0      | 0      | #NULL! | #NULL! |
|        | 0      | 0      | 0      | 0      | 0      | #NULL! | #NULL! |
|        | 0      | 0      | 1      | 0      | 1      | #NULL! | #NULL! |
|        | 0      | 0      | 0      | 0      | 0      | #NULL! | #NULL! |
|        | 1      | 0      | 1      | 1      | 1      | #NULL! | #NULL! |
|        | 0      | 0      | 0      | 0      | 0      | #NULL! | #NULL! |
|        | 0      | 0      | 1      | 0      | 1      | #NULL! | #NULL! |
|        | 0      | 0      | 0      | 0      | 0      | #NULL! | #NULL! |
|        | 0      | 0      | 1      | 0      | 0      | #NULL! | #NULL! |
|        | 0      | 0      | 0      | 0      | 0      | #NULL! | #NULL! |
|        | 0      | 0      | 0      | 0      | 0      | #NULL! | #NULL! |
|        | 0      | 0      | 1      | 0      | 1      | #NULL! | #NULL! |
|        | 0      | 0      | 0      | 0      | 0      | #NULL! | #NULL! |
|        | 0      | 0      | 0      | 0      | 0      | #NULL! | #NULL! |
|        | 0      | 0      | 0      | 0      | 1      | #NULL! | #NULL! |
|        | 0      | 0      | 0      | 0      | 0      | #NULL! | #NULL! |
|        | 0      | 0      | 0      | 0      | 1      | #NULL! | #NULL! |
|        | 0      | 0      | 0      | 0      | 0      | #NULL! | #NULL! |
|        | 0      | 0      | 0      | 0      | 0      | #NULL! | #NULL! |
|        | 2      | 0      | 1      | 1      | 1      | #NULL! | #NULL! |
|        | 0      | 0      | 2      | 0      | 2      | #NULL! | #NULL! |
|        | 0      | 0      | 0      | 0      | 1      | #NULL! | #NULL! |

|        |        |        |        |        |        |        |        |
|--------|--------|--------|--------|--------|--------|--------|--------|
| 0      | 0      | 0      | 0      | 2      | #NULL! | #NULL! |        |
| 0      | 0      | 0      | 0      | 0      | #NULL! | #NULL! |        |
| 0      | 0      | 1      | 0      | 0      | #NULL! | #NULL! |        |
| 0      | 0      | 0      | 0      | 0      | #NULL! | #NULL! |        |
| 0      | 0      | 0      | 0      | 2      | #NULL! | #NULL! |        |
| 0      | 0      | 0      | 0      | 2      | #NULL! | #NULL! |        |
| 0      | 0      | 0      | 0      | 2      | #NULL! | #NULL! |        |
| 0      | 0      | 0      | 0      | 2      | #NULL! | #NULL! |        |
| 0      | 0      | 0      | 0      | 1      | #NULL! | #NULL! |        |
| 0      | 0      | 1      | 1      | 0      | #NULL! | #NULL! |        |
| #NULL! | 0      | 0      | 0      | 0      | #NULL! | #NULL! |        |
| 0      | 0      | 0      | 0      | 1      | #NULL! | #NULL! |        |
| 0      | 0      | 0      | 0      | 0      | #NULL! | #NULL! |        |
| 1      | 0      | 1      | 1      | 2      | #NULL! | #NULL! |        |
| 0      | 0      | 2      | 0      | 2      | #NULL! | #NULL! |        |
| 0      | 0      | 0      | 0      | 0      | #NULL! | #NULL! |        |
| #NULL! | #NULL! | #NULL! | #NULL! | #NULL! | #NULL! | #NULL! |        |
| 2      | 2      | 2      | 2      | 2      | #NULL! | #NULL! |        |
| 0      | 0      | 0      | 0      | 1      | #NULL! | #NULL! |        |
| 0      | 0      | 0      | 0      | 0      | 2      | #NULL! | #NULL! |
| 0      | 0      | 0      | 0      | 0      | 0      | #NULL! | #NULL! |

| bullyc_pre | bullyd_pre | bullye_pre | bullyf_pre | pconnecta_pre | pconnectb_pre | pconnectc_pre |
|------------|------------|------------|------------|---------------|---------------|---------------|
| 0          | 0          | 0          | 0          | 4             | 4             | 4             |
| 0          | 0          | 0          | 0          | 99            | 99            | 99            |
| 4          | 0          | 0          | 0          | 1             | 1             | 0             |
| 1          | 2          | 4          | 4          | 4             | 4             | 3             |
| 0          | 0          | 0          | 0          | 4             | 4             | 4             |
| 99         | 99         | 99         | 99         | 99            | 99            | 99            |
| 0          | 0          | 0          | 0          | 4             | 4             | 4             |
| 0          | 2          | 0          | 0          | 2             | 3             | 0             |
| 99         | 99         | 99         | 99         | 99            | 99            | 99            |
| 2          | 0          | 0          | 0          | 3             | 2             | 2             |
| 1          | 1          | 0          | 0          | 99            | 99            | 99            |
| 0          | 1          | 0          | 0          | 3             | 4             | 3             |
| 0          | 0          | 0          | 0          | 4             | 4             | 3             |
| 0          | 2          | 0          | 1          | 0             | 1             | 0             |
| 0          | 0          | 0          | 0          | 4             | 4             | 4             |
| 1          | 1          | 0          | 0          | 0             | 0             | 0             |
| 0          | 0          | 0          | 0          | 4             | 4             | 4             |
| 0          | 1          | 1          | 0          | 1             | 4             | 4             |
| 0          | 1          | 0          | 0          | 3             | 4             | 4             |
| 0          | 2          | 0          | 0          | 2             | 4             | 2             |
| 99         | 99         | 99         | 99         | 99            | 99            | 99            |
| 0          | 0          | 0          | 0          | 0             | 99            | 4             |
| 0          | 0          | 0          | 0          | 3             | 4             | 99            |
| 0          | 0          | 0          | 0          | 4             | 4             | 4             |
| 0          | 0          | 0          | 0          | 4             | 4             | 4             |
| 0          | 0          | 0          | 0          | 4             | 4             | 4             |
| 0          | 0          | 0          | 0          | 4             | 4             | 4             |
| 0          | 0          | 0          | 0          | 4             | 4             | 4             |
| 0          | 1          | 0          | 0          | 4             | 2             | 1             |
| 0          | 0          | 0          | 0          | 4             | 4             | 3             |
| 0          | 99         | 1          | 0          | 4             | 4             | 4             |
| 0          | 2          | 0          | 0          | 4             | 4             | 4             |
| 0          | 4          | 0          | 0          | 4             | 4             | 2             |
| 1          | 0          | 1          | 0          | 4             | 4             | 4             |
| 0          | 0          | 0          | 0          | 4             | 4             | 4             |
| 0          | 0          | 1          | 0          | 1             | 99            | 99            |
| 0          | 0          | 0          | 0          | 4             | 4             | 2             |
| 0          | 0          | 2          | 0          | 4             | 3             | 4             |
| 0          | 0          | 1          | 0          | 4             | 4             | 2             |
| 2          | 0          | 0          | 0          | 4             | 4             | 4             |
| 0          | 4          | 4          | 0          | 4             | 3             | 2             |
| 0          | 1          | 2          | 4          | 4             | 4             | 4             |
| 0          | 1          | 0          | 0          | 4             | 4             | 4             |
| 99         | 99         | 99         | 99         | 3             | 2             | 3             |
| 0          | 0          | 0          | 0          | 4             | 4             | 4             |
| 0          | 0          | 0          | 0          | 4             | 4             | 4             |
| 0          | 1          | 0          | 0          | 3             | 4             | 4             |
| 0          | 2          | 1          | 0          | 2             | 3             | 3             |

|    |   |   |   |   |   |    |
|----|---|---|---|---|---|----|
| 0  | 2 | 0 | 0 | 4 | 2 | 1  |
| 0  | 1 | 1 | 0 | 4 | 4 | 4  |
| 0  | 0 | 0 | 0 | 3 | 4 | 4  |
| 3  | 4 | 2 | 0 | 3 | 3 | 99 |
| 3  | 2 | 3 | 0 | 4 | 4 | 4  |
| 0  | 2 | 3 | 3 | 2 | 2 | 2  |
| 0  | 0 | 0 | 0 | 4 | 4 | 4  |
| 2  | 1 | 2 | 0 | 2 | 4 | 3  |
| 0  | 0 | 0 | 0 | 4 | 4 | 4  |
| 0  | 0 | 0 | 0 | 4 | 4 | 4  |
| 0  | 0 | 0 | 0 | 0 | 3 | 0  |
| 0  | 1 | 0 | 0 | 4 | 4 | 4  |
| 0  | 0 | 0 | 0 | 1 | 4 | 1  |
| 0  | 0 | 0 | 0 | 1 | 1 | 1  |
| 0  | 0 | 0 | 0 | 4 | 4 | 4  |
| 0  | 1 | 4 | 0 | 2 | 1 | 0  |
| 1  | 2 | 3 | 0 | 4 | 4 | 3  |
| 0  | 4 | 1 | 1 | 4 | 3 | 4  |
| 0  | 0 | 0 | 0 | 2 | 1 | 2  |
| 0  | 0 | 0 | 0 | 4 | 3 | 4  |
| 1  | 0 | 0 | 0 | 2 | 2 | 2  |
| 0  | 0 | 0 | 0 | 4 | 4 | 4  |
| 1  | 2 | 2 | 0 | 3 | 3 | 2  |
| 3  | 4 | 0 | 0 | 4 | 2 | 0  |
| 0  | 0 | 0 | 0 | 4 | 4 | 4  |
| 0  | 0 | 0 | 0 | 4 | 4 | 4  |
| 0  | 4 | 1 | 0 | 4 | 4 | 4  |
| 0  | 0 | 0 | 0 | 2 | 2 | 2  |
| 0  | 3 | 1 | 0 | 3 | 2 | 3  |
| 0  | 1 | 0 | 0 | 4 | 4 | 4  |
| 0  | 0 | 0 | 0 | 4 | 4 | 4  |
| 0  | 2 | 1 | 0 | 4 | 4 | 4  |
| 0  | 1 | 1 | 0 | 4 | 4 | 4  |
| 2  | 2 | 0 | 1 | 3 | 4 | 2  |
| 0  | 0 | 0 | 0 | 4 | 2 | 3  |
| 0  | 1 | 0 | 0 | 0 | 0 | 0  |
| 0  | 0 | 0 | 0 | 2 | 1 | 1  |
| 1  | 2 | 0 | 0 | 4 | 4 | 3  |
| 2  | 3 | 2 | 0 | 4 | 4 | 3  |
| 0  | 0 | 0 | 0 | 4 | 4 | 4  |
| 0  | 1 | 0 | 0 | 3 | 4 | 2  |
| 0  | 0 | 0 | 0 | 3 | 4 | 4  |
| 1  | 2 | 0 | 2 | 3 | 4 | 4  |
| 0  | 0 | 0 | 0 | 4 | 4 | 4  |
| 0  | 0 | 0 | 0 | 3 | 4 | 4  |
| 0  | 0 | 0 | 0 | 4 | 4 | 4  |
| 0  | 1 | 0 | 0 | 4 | 4 | 4  |
| 99 | 1 | 0 | 0 | 2 | 2 | 1  |

|    |    |    |    |    |    |    |
|----|----|----|----|----|----|----|
| 1  | 0  | 0  | 0  | 1  | 2  | 2  |
| 2  | 2  | 2  | 2  | 2  | 2  | 2  |
| 0  | 1  | 0  | 0  | 4  | 4  | 4  |
| 0  | 1  | 0  | 0  | 4  | 4  | 4  |
| 0  | 0  | 0  | 0  | 4  | 4  | 4  |
| 0  | 0  | 0  | 0  | 4  | 4  | 4  |
| 0  | 0  | 0  | 0  | 4  | 4  | 2  |
| 0  | 0  | 0  | 0  | 4  | 4  | 4  |
| 0  | 4  | 2  | 0  | 4  | 4  | 4  |
| 4  | 4  | 4  | 4  | 2  | 2  | 1  |
| 0  | 1  | 0  | 0  | 4  | 4  | 4  |
| 2  | 0  | 4  | 0  | 3  | 3  | 2  |
| 0  | 0  | 0  | 0  | 3  | 3  | 3  |
| 1  | 0  | 0  | 0  | 3  | 4  | 3  |
| 0  | 0  | 0  | 0  | 0  | 4  | 0  |
| 3  | 4  | 0  | 0  | 2  | 2  | 0  |
| 0  | 1  | 3  | 3  | 4  | 4  | 4  |
| 3  | 0  | 0  | 0  | 3  | 4  | 3  |
| 0  | 0  | 0  | 0  | 4  | 4  | 4  |
| 0  | 0  | 0  | 0  | 0  | 2  | 2  |
| 4  | 2  | 0  | 0  | 4  | 4  | 4  |
| 0  | 2  | 0  | 0  | 4  | 4  | 4  |
| 0  | 0  | 0  | 0  | 0  | 0  | 0  |
| 2  | 3  | 4  | 0  | 4  | 4  | 4  |
| 0  | 0  | 0  | 0  | 4  | 4  | 4  |
| 2  | 0  | 0  | 0  | 2  | 2  | 2  |
| 1  | 0  | 2  | 2  | 3  | 3  | 4  |
| 0  | 0  | 0  | 0  | 4  | 4  | 4  |
| 4  | 0  | 0  | 0  | 4  | 4  | 4  |
| 0  | 1  | 0  | 0  | 3  | 4  | 4  |
| 0  | 2  | 0  | 0  | 99 | 99 | 2  |
| 2  | 0  | 0  | 0  | 3  | 2  | 3  |
| 99 | 99 | 99 | 99 | 99 | 99 | 99 |
| 0  | 99 | 0  | 0  | 4  | 4  | 4  |
| 0  | 0  | 0  | 0  | 4  | 4  | 4  |
| 0  | 0  | 0  | 0  | 4  | 4  | 4  |
| 0  | 0  | 0  | 0  | 4  | 4  | 3  |
| 0  | 1  | 0  | 0  | 1  | 4  | 2  |
| 0  | 3  | 2  | 1  | 2  | 3  | 3  |
| 0  | 4  | 2  | 0  | 3  | 4  | 3  |
| 0  | 0  | 0  | 0  | 4  | 4  | 4  |
| 0  | 0  | 3  | 0  | 4  | 4  | 3  |
| 0  | 2  | 2  | 2  | 4  | 4  | 4  |
| 0  | 2  | 0  | 0  | 2  | 3  | 2  |
| 0  | 0  | 0  | 0  | 4  | 4  | 4  |
| 99 | 99 | 99 | 99 | 99 | 99 | 99 |
| 4  | 4  | 4  | 4  | 3  | 2  | 2  |
| 0  | 1  | 2  | 2  | 1  | 3  | 2  |

|    |    |    |    |   |    |    |
|----|----|----|----|---|----|----|
| 0  | 0  | 0  | 0  | 2 | 3  | 3  |
| 0  | 0  | 0  | 0  | 4 | 4  | 4  |
| 0  | 1  | 0  | 0  | 4 | 4  | 4  |
| 0  | 2  | 1  | 2  | 4 | 4  | 4  |
| 0  | 1  | 0  | 0  | 4 | 4  | 4  |
| 99 | 99 | 99 | 99 | 3 | 4  | 4  |
| 0  | 0  | 0  | 0  | 0 | 0  | 0  |
| 0  | 0  | 0  | 0  | 4 | 4  | 4  |
| 0  | 0  | 1  | 0  | 4 | 4  | 4  |
| 1  | 0  | 0  | 0  | 2 | 1  | 1  |
| 0  | 1  | 0  | 0  | 4 | 4  | 4  |
| 0  | 0  | 0  | 0  | 0 | 0  | 0  |
| 0  | 1  | 0  | 0  | 2 | 3  | 3  |
| 0  | 1  | 0  | 0  | 4 | 4  | 4  |
| 0  | 0  | 0  | 0  | 4 | 4  | 3  |
| 0  | 0  | 0  | 0  | 4 | 4  | 3  |
| 0  | 0  | 2  | 0  | 4 | 4  | 4  |
| 0  | 0  | 0  | 0  | 3 | 4  | 3  |
| 0  | 2  | 1  | 0  | 3 | 1  | 1  |
| 0  | 0  | 0  | 0  | 3 | 4  | 99 |
| 4  | 0  | 0  | 0  | 1 | 1  | 2  |
| 0  | 0  | 0  | 0  | 4 | 4  | 4  |
| 0  | 0  | 0  | 0  | 4 | 4  | 4  |
| 0  | 0  | 0  | 0  | 4 | 4  | 4  |
| 0  | 0  | 0  | 0  | 4 | 4  | 4  |
| 0  | 0  | 0  | 0  | 4 | 4  | 4  |
| 0  | 0  | 0  | 0  | 4 | 4  | 4  |
| 0  | 0  | 0  | 0  | 4 | 4  | 4  |
| 0  | 0  | 0  | 0  | 4 | 4  | 4  |
| 0  | 0  | 0  | 0  | 4 | 4  | 4  |
| 0  | 1  | 0  | 0  | 3 | 99 | 99 |
| 2  | 3  | 4  | 0  | 4 | 4  | 4  |
| 0  | 0  | 0  | 0  | 3 | 4  | 0  |
| 0  | 0  | 0  | 0  | 4 | 4  | 4  |
| 0  | 0  | 0  | 0  | 0 | 0  | 0  |
| 0  | 0  | 0  | 0  | 4 | 4  | 4  |
| 0  | 0  | 0  | 0  | 4 | 4  | 0  |
| 0  | 0  | 0  | 0  | 4 | 4  | 4  |
| 0  | 0  | 0  | 0  | 4 | 4  | 4  |
| 0  | 0  | 0  | 0  | 4 | 4  | 4  |
| 0  | 0  | 0  | 0  | 4 | 4  | 4  |
| 2  | 0  | 0  | 0  | 4 | 4  | 3  |
| 0  | 0  | 0  | 0  | 4 | 4  | 4  |
| 0  | 1  | 0  | 0  | 4 | 4  | 0  |
| 0  | 3  | 0  | 2  | 4 | 4  | 4  |
| 0  | 0  | 0  | 0  | 4 | 4  | 4  |
| 0  | 0  | 0  | 0  | 4 | 4  | 4  |
| 0  | 0  | 0  | 0  | 4 | 4  | 4  |
| 1  | 0  | 0  | 0  | 4 | 4  | 4  |
| 0  | 0  | 0  | 0  | 4 | 4  | 4  |
| 0  | 0  | 0  | 0  | 4 | 4  | 3  |
| 0  | 0  | 0  | 0  | 3 | 2  | 1  |
| 0  | 0  | 0  | 0  | 4 | 4  | 4  |
| 0  | 0  | 0  | 0  | 4 | 4  | 4  |
| 0  | 0  | 0  | 0  | 4 | 4  | 4  |
| 0  | 1  | 0  | 0  | 2 | 4  | 3  |
| 0  | 0  | 0  | 0  | 4 | 4  | 4  |



|    |    |    |    |    |    |   |
|----|----|----|----|----|----|---|
| 0  | 0  | 0  | 0  | 4  | 4  | 4 |
| 0  | 0  | 0  | 0  | 4  | 4  | 4 |
| 2  | 0  | 1  | 0  | 4  | 4  | 4 |
| 0  | 1  | 0  | 0  | 4  | 4  | 2 |
| 0  | 3  | 3  | 0  | 3  | 4  | 1 |
| 2  | 0  | 0  | 0  | 3  | 3  | 3 |
| 0  | 0  | 0  | 0  | 4  | 4  | 3 |
| 1  | 0  | 0  | 0  | 2  | 2  | 1 |
| 0  | 0  | 0  | 0  | 0  | 0  | 0 |
| 4  | 3  | 99 | 0  | 1  | 2  | 2 |
| 0  | 0  | 0  | 0  | 4  | 4  | 4 |
| 0  | 0  | 0  | 0  | 4  | 4  | 4 |
| 0  | 2  | 0  | 0  | 2  | 4  | 1 |
| 99 | 99 | 99 | 99 | 4  | 4  | 4 |
| 0  | 0  | 0  | 0  | 3  | 3  | 4 |
| 0  | 0  | 0  | 0  | 4  | 4  | 4 |
| 0  | 0  | 0  | 0  | 4  | 4  | 4 |
| 0  | 0  | 0  | 0  | 0  | 99 | 1 |
| 1  | 0  | 0  | 0  | 4  | 4  | 4 |
| 0  | 0  | 0  | 0  | 1  | 2  | 2 |
| 0  | 0  | 0  | 0  | 4  | 4  | 4 |
| 0  | 0  | 0  | 0  | 4  | 4  | 4 |
| 0  | 0  | 0  | 0  | 2  | 0  | 2 |
| 0  | 0  | 0  | 0  | 2  | 1  | 2 |
| 4  | 4  | 4  | 4  | 4  | 4  | 2 |
| 1  | 0  | 4  | 1  | 4  | 4  | 4 |
| 1  | 0  | 0  | 0  | 2  | 1  | 3 |
| 2  | 1  | 2  | 0  | 2  | 2  | 0 |
| 3  | 2  | 0  | 0  | 0  | 0  | 0 |
| 4  | 0  | 0  | 0  | 4  | 4  | 4 |
| 1  | 0  | 0  | 0  | 4  | 4  | 4 |
| 0  | 0  | 0  | 0  | 4  | 3  | 4 |
| 0  | 0  | 0  | 0  | 4  | 4  | 4 |
| 0  | 0  | 0  | 0  | 99 | 2  | 2 |
| 1  | 4  | 4  | 4  | 4  | 4  | 4 |
| 1  | 4  | 4  | 0  | 1  | 2  | 0 |
| 0  | 0  | 0  | 0  | 1  | 2  | 2 |
| 0  | 0  | 0  | 0  | 3  | 4  | 2 |
| 0  | 0  | 0  | 0  | 3  | 3  | 3 |
| 1  | 0  | 0  | 0  | 4  | 3  | 4 |
| 1  | 2  | 99 | 99 | 2  | 2  | 1 |
| 2  | 0  | 0  | 0  | 3  | 3  | 3 |
| 0  | 0  | 0  | 0  | 4  | 4  | 4 |
| 0  | 0  | 0  | 0  | 4  | 4  | 4 |
| 0  | 1  | 0  | 0  | 0  | 1  | 0 |
| 0  | 0  | 0  | 0  | 2  | 1  | 3 |
| 0  | 0  | 0  | 0  | 4  | 4  | 4 |
| 0  | 0  | 0  | 0  | 3  | 4  | 0 |

|   |   |   |   |    |    |    |
|---|---|---|---|----|----|----|
| 1 | 1 | 1 | 1 | 3  | 4  | 4  |
| 1 | 4 | 1 | 0 | 4  | 4  | 4  |
| 0 | 0 | 0 | 0 | 2  | 2  | 3  |
| 0 | 0 | 0 | 0 | 3  | 3  | 4  |
| 2 | 1 | 0 | 0 | 4  | 4  | 4  |
| 0 | 1 | 0 | 0 | 4  | 4  | 4  |
| 3 | 4 | 4 | 2 | 4  | 4  | 4  |
| 2 | 1 | 0 | 0 | 4  | 4  | 4  |
| 0 | 2 | 1 | 1 | 3  | 4  | 3  |
| 0 | 0 | 0 | 0 | 4  | 4  | 4  |
| 0 | 1 | 0 | 0 | 2  | 4  | 4  |
| 0 | 0 | 0 | 0 | 4  | 4  | 4  |
| 0 | 0 | 4 | 0 | 4  | 4  | 3  |
| 0 | 0 | 0 | 0 | 3  | 4  | 3  |
| 0 | 0 | 0 | 0 | 4  | 4  | 4  |
| 2 | 0 | 0 | 0 | 3  | 4  | 3  |
| 4 | 2 | 0 | 0 | 0  | 1  | 1  |
| 1 | 1 | 0 | 2 | 4  | 4  | 4  |
| 3 | 2 | 2 | 2 | 99 | 99 | 99 |
| 0 | 0 | 0 | 0 | 4  | 4  | 3  |
| 0 | 1 | 1 | 0 | 4  | 4  | 4  |
| 3 | 4 | 3 | 0 | 3  | 3  | 3  |
| 0 | 2 | 1 | 1 | 4  | 4  | 3  |
| 1 | 0 | 0 | 0 | 3  | 4  | 3  |
| 2 | 3 | 0 | 0 | 3  | 4  | 3  |
| 0 | 1 | 0 | 0 | 4  | 4  | 4  |
| 0 | 0 | 0 | 0 | 4  | 4  | 4  |
| 0 | 0 | 0 | 0 | 4  | 4  | 3  |
| 1 | 0 | 0 | 0 | 4  | 3  | 3  |
| 0 | 0 | 0 | 0 | 4  | 4  | 4  |
| 0 | 0 | 0 | 0 | 3  | 4  | 3  |
| 0 | 1 | 0 | 0 | 4  | 3  | 3  |
| 0 | 1 | 0 | 0 | 4  | 3  | 4  |
| 0 | 0 | 0 | 0 | 4  | 4  | 4  |
| 0 | 0 | 0 | 0 | 2  | 4  | 4  |
| 0 | 0 | 0 | 0 | 3  | 4  | 3  |
| 1 | 1 | 0 | 1 | 3  | 3  | 3  |
| 0 | 0 | 0 | 0 | 4  | 4  | 4  |
| 0 | 2 | 2 | 0 | 4  | 4  | 4  |
| 0 | 4 | 0 | 0 | 4  | 4  | 4  |
| 2 | 3 | 2 | 2 | 2  | 2  | 0  |
| 0 | 0 | 0 | 0 | 3  | 3  | 3  |
| 0 | 1 | 2 | 0 | 3  | 2  | 1  |
| 0 | 0 | 0 | 0 | 4  | 4  | 3  |
| 0 | 2 | 1 | 0 | 4  | 4  | 4  |
| 0 | 1 | 3 | 1 | 1  | 0  | 2  |
| 1 | 2 | 1 | 0 | 4  | 4  | 4  |
| 0 | 1 | 0 | 0 | 4  | 4  | 3  |

|   |    |   |   |    |    |    |
|---|----|---|---|----|----|----|
| 0 | 0  | 0 | 0 | 4  | 4  | 4  |
| 1 | 1  | 0 | 0 | 4  | 4  | 4  |
| 0 | 0  | 1 | 0 | 3  | 3  | 3  |
| 0 | 1  | 0 | 0 | 99 | 99 | 99 |
| 0 | 0  | 0 | 0 | 4  | 4  | 4  |
| 0 | 0  | 0 | 0 | 1  | 4  | 0  |
| 1 | 0  | 0 | 0 | 4  | 3  | 3  |
| 0 | 1  | 0 | 0 | 4  | 4  | 4  |
| 0 | 0  | 0 | 0 | 4  | 4  | 4  |
| 2 | 0  | 0 | 0 | 4  | 4  | 4  |
| 0 | 0  | 0 | 0 | 4  | 4  | 4  |
| 0 | 0  | 0 | 0 | 3  | 3  | 3  |
| 0 | 0  | 0 | 0 | 3  | 4  | 2  |
| 1 | 1  | 0 | 0 | 4  | 4  | 3  |
| 3 | 0  | 2 | 0 | 3  | 4  | 3  |
| 0 | 0  | 0 | 0 | 4  | 4  | 4  |
| 0 | 0  | 0 | 0 | 4  | 4  | 4  |
| 0 | 2  | 0 | 0 | 4  | 4  | 4  |
| 0 | 0  | 0 | 0 | 4  | 4  | 4  |
| 2 | 0  | 0 | 0 | 4  | 4  | 4  |
| 1 | 0  | 0 | 0 | 2  | 4  | 3  |
| 1 | 3  | 1 | 0 | 4  | 4  | 3  |
| 0 | 0  | 0 | 0 | 1  | 3  | 2  |
| 0 | 1  | 0 | 0 | 3  | 4  | 4  |
| 1 | 99 | 1 | 0 | 1  | 2  | 2  |
| 0 | 0  | 0 | 0 | 4  | 4  | 4  |
| 1 | 0  | 1 | 0 | 4  | 4  | 2  |
| 1 | 2  | 2 | 1 | 4  | 4  | 4  |
| 0 | 2  | 2 | 0 | 2  | 3  | 3  |
| 0 | 0  | 0 | 0 | 4  | 4  | 4  |
| 0 | 1  | 0 | 0 | 4  | 4  | 4  |
| 0 | 1  | 0 | 0 | 2  | 2  | 0  |
| 2 | 3  | 3 | 3 | 4  | 4  | 4  |
| 0 | 0  | 0 | 0 | 4  | 3  | 4  |
| 0 | 0  | 0 | 0 | 4  | 4  | 4  |
| 0 | 0  | 0 | 0 | 4  | 4  | 4  |
| 0 | 0  | 0 | 0 | 3  | 4  | 2  |
| 0 | 0  | 0 | 0 | 3  | 2  | 4  |
| 0 | 0  | 0 | 0 | 4  | 4  | 3  |
| 0 | 0  | 0 | 0 | 4  | 4  | 4  |
| 1 | 0  | 0 | 0 | 4  | 4  | 4  |
| 1 | 3  | 2 | 1 | 4  | 4  | 4  |
| 2 | 0  | 0 | 0 | 3  | 4  | 3  |
| 0 | 0  | 0 | 0 | 4  | 4  | 4  |
| 0 | 4  | 2 | 0 | 4  | 3  | 2  |
| 0 | 1  | 1 | 0 | 4  | 4  | 4  |
| 0 | 1  | 0 | 0 | 4  | 4  | 3  |
| 4 | 4  | 2 | 0 | 4  | 2  | 4  |
| 0 | 0  | 0 | 0 | 4  | 4  | 4  |

|    |    |    |    |    |    |    |
|----|----|----|----|----|----|----|
| 0  | 1  | 1  | 0  | 4  | 4  | 4  |
| 0  | 2  | 2  | 0  | 3  | 4  | 2  |
| 0  | 0  | 0  | 0  | 4  | 4  | 3  |
| 0  | 1  | 0  | 0  | 4  | 4  | 2  |
| 1  | 1  | 0  | 1  | 3  | 3  | 2  |
| 99 | 99 | 99 | 99 | 99 | 99 | 99 |
| 2  | 4  | 3  | 0  | 1  | 2  | 0  |
| 0  | 0  | 0  | 0  | 3  | 4  | 4  |
| 0  | 0  | 0  | 0  | 4  | 4  | 4  |
| 0  | 4  | 0  | 0  | 2  | 2  | 2  |
| 0  | 0  | 0  | 0  | 4  | 4  | 4  |
| 0  | 0  | 0  | 0  | 4  | 4  | 4  |
| 1  | 0  | 1  | 1  | 2  | 2  | 2  |
| 0  | 3  | 4  | 0  | 3  | 4  | 3  |
| 0  | 1  | 2  | 0  | 4  | 4  | 4  |
| 0  | 0  | 0  | 0  | 3  | 4  | 3  |
| 0  | 2  | 2  | 0  | 2  | 2  | 3  |
| 0  | 0  | 0  | 0  | 4  | 4  | 3  |
| 0  | 1  | 0  | 0  | 4  | 4  | 4  |
| 0  | 0  | 0  | 0  | 3  | 4  | 3  |
| 0  | 0  | 0  | 0  | 4  | 4  | 3  |
| 1  | 0  | 0  | 0  | 3  | 4  | 2  |
| 2  | 0  | 0  | 0  | 4  | 4  | 4  |
| 0  | 1  | 1  | 0  | 3  | 2  | 2  |
| 2  | 3  | 0  | 0  | 2  | 3  | 2  |
| 0  | 2  | 1  | 0  | 3  | 4  | 4  |
| 0  | 0  | 0  | 0  | 4  | 4  | 4  |
| 0  | 0  | 0  | 0  | 99 | 99 | 99 |
| 0  | 0  | 0  | 0  | 2  | 4  | 3  |
| 0  | 0  | 1  | 0  | 4  | 4  | 4  |
| 0  | 0  | 0  | 0  | 4  | 3  | 3  |
| 0  | 0  | 0  | 0  | 4  | 4  | 0  |
| 0  | 0  | 0  | 0  | 4  | 4  | 4  |
| 0  | 0  | 0  | 0  | 4  | 2  | 3  |
| 0  | 3  | 4  | 99 | 4  | 4  | 4  |
| 0  | 0  | 0  | 0  | 4  | 4  | 4  |
| 1  | 4  | 1  | 0  | 4  | 3  | 4  |
| 0  | 0  | 0  | 1  | 4  | 4  | 4  |
| 0  | 0  | 0  | 1  | 4  | 4  | 3  |
| 0  | 1  | 0  | 0  | 4  | 4  | 2  |
| 0  | 0  | 0  | 0  | 2  | 4  | 3  |
| 0  | 4  | 0  | 0  | 4  | 4  | 4  |
| 1  | 0  | 0  | 0  | 2  | 3  | 2  |
| 1  | 0  | 0  | 0  | 2  | 3  | 3  |
| 0  | 0  | 0  | 0  | 4  | 4  | 2  |
| 0  | 0  | 0  | 0  | 4  | 4  | 4  |
| 0  | 0  | 0  | 0  | 4  | 4  | 4  |
| 0  | 0  | 0  | 0  | 4  | 4  | 4  |

|    |    |    |    |    |    |    |
|----|----|----|----|----|----|----|
| 0  | 0  | 0  | 0  | 4  | 4  | 4  |
| 0  | 0  | 0  | 0  | 4  | 4  | 4  |
| 0  | 0  | 0  | 0  | 3  | 3  | 4  |
| 1  | 4  | 2  | 0  | 2  | 2  | 2  |
| 0  | 2  | 3  | 4  | 3  | 4  | 4  |
| 99 | 1  | 0  | 0  | 4  | 4  | 4  |
| 0  | 0  | 0  | 0  | 4  | 4  | 4  |
| 4  | 4  | 3  | 0  | 0  | 0  | 0  |
| 0  | 2  | 3  | 2  | 4  | 4  | 4  |
| 4  | 4  | 4  | 4  | 4  | 4  | 4  |
| 0  | 0  | 0  | 0  | 4  | 4  | 4  |
| 1  | 0  | 0  | 0  | 3  | 4  | 3  |
| 0  | 1  | 0  | 0  | 2  | 2  | 2  |
| 0  | 0  | 0  | 0  | 4  | 4  | 3  |
| 0  | 0  | 0  | 0  | 4  | 4  | 4  |
| 1  | 2  | 3  | 1  | 4  | 2  | 3  |
| 3  | 4  | 4  | 1  | 0  | 1  | 0  |
| 0  | 0  | 1  | 0  | 4  | 4  | 4  |
| 0  | 0  | 0  | 0  | 3  | 3  | 3  |
| 1  | 4  | 0  | 0  | 4  | 4  | 4  |
| 1  | 1  | 4  | 2  | 3  | 3  | 3  |
| 0  | 1  | 0  | 0  | 1  | 4  | 4  |
| 0  | 0  | 0  | 0  | 3  | 4  | 2  |
| 0  | 0  | 2  | 0  | 2  | 3  | 2  |
| 3  | 2  | 0  | 0  | 4  | 3  | 3  |
| 1  | 0  | 0  | 0  | 3  | 1  | 2  |
| 0  | 2  | 2  | 0  | 4  | 2  | 3  |
| 0  | 0  | 0  | 0  | 3  | 4  | 4  |
| 0  | 0  | 0  | 0  | 1  | 2  | 4  |
| 0  | 0  | 0  | 0  | 4  | 4  | 4  |
| 0  | 1  | 1  | 0  | 4  | 4  | 4  |
| 0  | 0  | 0  | 0  | 3  | 4  | 4  |
| 1  | 4  | 0  | 0  | 4  | 4  | 4  |
| 0  | 0  | 0  | 0  | 4  | 4  | 4  |
| 0  | 2  | 0  | 0  | 0  | 0  | 0  |
| 0  | 0  | 0  | 0  | 4  | 4  | 4  |
| 2  | 4  | 3  | 0  | 4  | 4  | 4  |
| 2  | 4  | 2  | 0  | 4  | 3  | 4  |
| 0  | 99 | 2  | 2  | 4  | 4  | 3  |
| 0  | 0  | 0  | 0  | 4  | 4  | 4  |
| 2  | 4  | 0  | 0  | 4  | 4  | 4  |
| 2  | 3  | 2  | 0  | 2  | 2  | 1  |
| 0  | 0  | 0  | 0  | 4  | 3  | 4  |
| 99 | 99 | 99 | 99 | 99 | 99 | 99 |
| 0  | 0  | 0  | 1  | 2  | 4  | 3  |
| 1  | 1  | 0  | 0  | 3  | 3  | 3  |
| 0  | 2  | 0  | 0  | 3  | 4  | 3  |
| 1  | 0  | 0  | 0  | 4  | 4  | 4  |

|   |    |    |    |    |    |    |
|---|----|----|----|----|----|----|
| 4 | 4  | 0  | 0  | 4  | 4  | 4  |
| 1 | 3  | 0  | 0  | 4  | 4  | 3  |
| 0 | 0  | 0  | 0  | 4  | 4  | 4  |
| 0 | 1  | 0  | 0  | 4  | 4  | 4  |
| 0 | 0  | 0  | 0  | 4  | 4  | 4  |
| 3 | 0  | 1  | 0  | 3  | 3  | 4  |
| 0 | 0  | 0  | 0  | 4  | 4  | 4  |
| 0 | 1  | 3  | 0  | 3  | 3  | 3  |
| 3 | 3  | 3  | 0  | 3  | 3  | 2  |
| 0 | 0  | 0  | 0  | 3  | 3  | 3  |
| 2 | 0  | 0  | 0  | 2  | 2  | 1  |
| 1 | 2  | 1  | 0  | 4  | 4  | 4  |
| 0 | 0  | 0  | 0  | 4  | 4  | 4  |
| 0 | 1  | 0  | 1  | 4  | 4  | 3  |
| 0 | 2  | 0  | 1  | 2  | 2  | 2  |
| 0 | 99 | 1  | 0  | 4  | 4  | 4  |
| 2 | 0  | 0  | 0  | 4  | 4  | 4  |
| 0 | 0  | 0  | 0  | 4  | 4  | 4  |
| 1 | 3  | 0  | 0  | 4  | 4  | 4  |
| 1 | 1  | 0  | 0  | 3  | 2  | 3  |
| 0 | 0  | 0  | 0  | 4  | 4  | 4  |
| 2 | 0  | 0  | 0  | 0  | 1  | 99 |
| 0 | 2  | 1  | 0  | 3  | 3  | 2  |
| 0 | 0  | 0  | 0  | 4  | 4  | 4  |
| 2 | 0  | 0  | 0  | 2  | 3  | 1  |
| 0 | 2  | 0  | 0  | 4  | 4  | 3  |
| 2 | 99 | 0  | 0  | 1  | 0  | 0  |
| 2 | 1  | 1  | 0  | 4  | 4  | 4  |
| 0 | 0  | 0  | 0  | 3  | 4  | 3  |
| 1 | 2  | 1  | 0  | 4  | 4  | 3  |
| 0 | 2  | 4  | 0  | 1  | 1  | 2  |
| 0 | 0  | 0  | 0  | 3  | 3  | 2  |
| 0 | 1  | 0  | 0  | 4  | 4  | 3  |
| 0 | 0  | 0  | 1  | 4  | 3  | 4  |
| 0 | 0  | 0  | 0  | 99 | 99 | 4  |
| 0 | 1  | 0  | 0  | 4  | 4  | 4  |
| 2 | 99 | 1  | 0  | 2  | 2  | 2  |
| 0 | 0  | 0  | 0  | 3  | 3  | 2  |
| 0 | 0  | 0  | 0  | 4  | 4  | 4  |
| 0 | 0  | 0  | 0  | 3  | 4  | 4  |
| 0 | 2  | 1  | 0  | 1  | 1  | 0  |
| 0 | 99 | 99 | 99 | 99 | 99 | 99 |
| 1 | 0  | 3  | 4  | 4  | 3  | 4  |
| 0 | 1  | 0  | 0  | 4  | 4  | 4  |
| 0 | 0  | 0  | 0  | 4  | 4  | 4  |
| 0 | 0  | 0  | 0  | 0  | 1  | 3  |
| 0 | 0  | 0  | 0  | 3  | 3  | 3  |
| 1 | 0  | 0  | 0  | 4  | 99 | 1  |

|    |    |   |    |    |    |    |
|----|----|---|----|----|----|----|
| 4  | 1  | 1 | 0  | 4  | 4  | 4  |
| 0  | 0  | 0 | 0  | 4  | 4  | 4  |
| 0  | 1  | 2 | 0  | 4  | 4  | 4  |
| 0  | 0  | 0 | 0  | 3  | 4  | 3  |
| 0  | 3  | 2 | 0  | 3  | 2  | 2  |
| 0  | 0  | 0 | 0  | 4  | 4  | 3  |
| 0  | 2  | 0 | 0  | 4  | 4  | 4  |
| 3  | 4  | 4 | 4  | 2  | 3  | 1  |
| 0  | 0  | 0 | 0  | 3  | 1  | 4  |
| 0  | 2  | 0 | 0  | 4  | 4  | 4  |
| 0  | 0  | 0 | 0  | 4  | 4  | 4  |
| 1  | 99 | 0 | 0  | 4  | 4  | 4  |
| 0  | 0  | 0 | 0  | 4  | 4  | 4  |
| 1  | 1  | 0 | 0  | 4  | 4  | 4  |
| 0  | 0  | 0 | 0  | 0  | 0  | 0  |
| 0  | 0  | 0 | 0  | 4  | 4  | 4  |
| 0  | 0  | 0 | 0  | 4  | 4  | 4  |
| 0  | 0  | 0 | 0  | 4  | 4  | 4  |
| 0  | 0  | 0 | 0  | 4  | 4  | 4  |
| 0  | 0  | 0 | 0  | 4  | 4  | 4  |
| 0  | 0  | 0 | 0  | 4  | 4  | 4  |
| 0  | 0  | 0 | 0  | 4  | 4  | 3  |
| 0  | 0  | 0 | 0  | 4  | 4  | 3  |
| 99 | 0  | 0 | 0  | 4  | 2  | 3  |
| 0  | 1  | 0 | 0  | 4  | 4  | 4  |
| 0  | 2  | 0 | 0  | 4  | 3  | 2  |
| 99 | 99 | 1 | 99 | 99 | 99 | 99 |
| 0  | 4  | 1 | 0  | 99 | 3  | 3  |
| 0  | 1  | 0 | 0  | 4  | 4  | 4  |
| 1  | 3  | 2 | 0  | 4  | 4  | 4  |
| 0  | 2  | 2 | 0  | 4  | 4  | 4  |
| 0  | 0  | 0 | 0  | 4  | 4  | 4  |
| 3  | 0  | 0 | 0  | 4  | 4  | 4  |
| 0  | 0  | 0 | 0  | 4  | 4  | 4  |
| 0  | 0  | 0 | 0  | 4  | 4  | 4  |
| 0  | 0  | 0 | 0  | 4  | 4  | 4  |
| 0  | 0  | 0 | 0  | 4  | 4  | 4  |
| 0  | 0  | 0 | 0  | 4  | 4  | 0  |
| 0  | 0  | 0 | 0  | 2  | 99 | 4  |
| 0  | 0  | 0 | 0  | 4  | 4  | 4  |
| 0  | 0  | 0 | 0  | 2  | 1  | 2  |
| 1  | 0  | 2 | 0  | 2  | 1  | 3  |
| 0  | 3  | 3 | 0  | 3  | 4  | 4  |
| 1  | 2  | 0 | 0  | 4  | 4  | 4  |
| 4  | 1  | 0 | 0  | 3  | 2  | 3  |
| 0  | 0  | 0 | 0  | 4  | 4  | 2  |
| 0  | 1  | 0 | 0  | 4  | 4  | 4  |
| 0  | 0  | 0 | 0  | 2  | 4  | 4  |
| 3  | 4  | 2 | 0  | 4  | 4  | 4  |
| 1  | 0  | 0 | 0  | 4  | 4  | 4  |
| 0  | 2  | 0 | 0  | 4  | 4  | 4  |
| 0  | 1  | 0 | 0  | 2  | 4  | 4  |

|    |    |    |    |    |    |    |
|----|----|----|----|----|----|----|
| 0  | 0  | 0  | 0  | 4  | 4  | 4  |
| 0  | 2  | 0  | 0  | 2  | 3  | 1  |
| 0  | 1  | 1  | 0  | 2  | 4  | 2  |
| 0  | 2  | 0  | 0  | 4  | 4  | 4  |
| 4  | 3  | 99 | 0  | 2  | 3  | 2  |
| 0  | 0  | 0  | 0  | 4  | 4  | 4  |
| 1  | 0  | 0  | 0  | 4  | 4  | 4  |
| 2  | 0  | 0  | 0  | 3  | 2  | 3  |
| 0  | 1  | 1  | 0  | 4  | 4  | 4  |
| 0  | 2  | 0  | 0  | 3  | 4  | 3  |
| 0  | 3  | 1  | 0  | 4  | 1  | 4  |
| 0  | 0  | 0  | 0  | 4  | 4  | 4  |
| 0  | 1  | 1  | 0  | 2  | 3  | 1  |
| 0  | 1  | 1  | 0  | 2  | 4  | 2  |
| 99 | 99 | 99 | 99 | 99 | 99 | 99 |
| 0  | 0  | 0  | 0  | 3  | 3  | 3  |
| 0  | 1  | 1  | 0  | 4  | 3  | 3  |
| 0  | 0  | 0  | 0  | 4  | 4  | 4  |
| 0  | 0  | 0  | 0  | 4  | 4  | 4  |
| 1  | 1  | 0  | 0  | 4  | 4  | 3  |
| 2  | 0  | 0  | 0  | 4  | 4  | 4  |
| 0  | 0  | 0  | 0  | 2  | 4  | 3  |
| 0  | 4  | 0  | 0  | 0  | 0  | 0  |
| 1  | 3  | 0  | 4  | 2  | 4  | 2  |
| 4  | 1  | 2  | 0  | 3  | 3  | 2  |
| 99 | 99 | 99 | 99 | 2  | 2  | 2  |
| 2  | 99 | 1  | 0  | 4  | 2  | 3  |
| 0  | 1  | 1  | 0  | 4  | 4  | 4  |
| 0  | 4  | 0  | 0  | 4  | 4  | 4  |
| 0  | 0  | 0  | 0  | 4  | 4  | 4  |
| 0  | 0  | 0  | 0  | 4  | 4  | 4  |
| 0  | 0  | 0  | 0  | 4  | 4  | 4  |
| 0  | 1  | 0  | 0  | 4  | 4  | 4  |
| 0  | 0  | 0  | 0  | 3  | 4  | 3  |
| 0  | 1  | 2  | 0  | 2  | 4  | 1  |
| 0  | 1  | 0  | 0  | 4  | 4  | 99 |
| 0  | 0  | 0  | 0  | 4  | 4  | 4  |
| 0  | 0  | 0  | 0  | 2  | 2  | 3  |
| 0  | 0  | 0  | 0  | 2  | 2  | 2  |
| 4  | 3  | 2  | 3  | 2  | 3  | 2  |
| 0  | 0  | 0  | 0  | 4  | 4  | 3  |
| 0  | 0  | 0  | 0  | 4  | 4  | 4  |
| 1  | 1  | 0  | 0  | 3  | 4  | 3  |
| 0  | 0  | 0  | 0  | 4  | 4  | 4  |
| 0  | 1  | 1  | 0  | 4  | 4  | 2  |
| 0  | 0  | 0  | 0  | 4  | 4  | 4  |
| 0  | 0  | 0  | 0  | 0  | 0  | 0  |
| 0  | 0  | 0  | 0  | 3  | 4  | 3  |
| 0  | 0  | 0  | 0  | 4  | 4  | 4  |



|    |    |    |    |    |    |    |
|----|----|----|----|----|----|----|
| 0  | 0  | 0  | 0  | 4  | 4  | 4  |
| 3  | 99 | 0  | 0  | 4  | 4  | 4  |
| 0  | 2  | 0  | 2  | 4  | 4  | 4  |
| 2  | 2  | 1  | 0  | 4  | 4  | 4  |
| 0  | 0  | 0  | 0  | 4  | 4  | 4  |
| 0  | 0  | 0  | 0  | 4  | 4  | 3  |
| 0  | 0  | 0  | 0  | 0  | 0  | 0  |
| 0  | 0  | 0  | 0  | 4  | 4  | 4  |
| 0  | 1  | 0  | 0  | 4  | 4  | 4  |
| 3  | 1  | 2  | 0  | 4  | 4  | 3  |
| 0  | 0  | 0  | 0  | 3  | 4  | 4  |
| 0  | 0  | 0  | 0  | 2  | 1  | 2  |
| 1  | 0  | 0  | 0  | 1  | 4  | 0  |
| 0  | 4  | 0  | 1  | 0  | 4  | 4  |
| 0  | 0  | 0  | 0  | 4  | 4  | 4  |
| 0  | 2  | 1  | 1  | 1  | 1  | 0  |
| 0  | 0  | 0  | 0  | 4  | 4  | 4  |
| 0  | 0  | 0  | 0  | 4  | 4  | 4  |
| 2  | 2  | 0  | 0  | 4  | 4  | 4  |
| 0  | 0  | 0  | 0  | 4  | 4  | 4  |
| 1  | 0  | 1  | 0  | 1  | 4  | 3  |
| 0  | 1  | 2  | 0  | 4  | 4  | 4  |
| 2  | 0  | 0  | 0  | 0  | 1  | 0  |
| 0  | 0  | 0  | 0  | 3  | 3  | 4  |
| 0  | 4  | 1  | 0  | 4  | 4  | 3  |
| 0  | 0  | 0  | 0  | 4  | 4  | 99 |
| 99 | 99 | 99 | 99 | 4  | 4  | 4  |
| 0  | 1  | 0  | 0  | 99 | 4  | 2  |
| 0  | 99 | 1  | 1  | 4  | 4  | 4  |
| 0  | 0  | 0  | 0  | 4  | 4  | 4  |
| 99 | 99 | 99 | 99 | 99 | 99 | 99 |
| 0  | 0  | 0  | 0  | 4  | 4  | 4  |
| 0  | 0  | 0  | 0  | 4  | 4  | 4  |
| 0  | 0  | 0  | 0  | 4  | 4  | 99 |
| 0  | 0  | 0  | 0  | 4  | 4  | 4  |
| 0  | 0  | 0  | 0  | 4  | 4  | 3  |
| 0  | 0  | 0  | 0  | 4  | 4  | 4  |
| 0  | 0  | 0  | 0  | 4  | 4  | 4  |
| 0  | 0  | 0  | 0  | 0  | 0  | 0  |
| 0  | 1  | 0  | 0  | 4  | 4  | 4  |
| 0  | 0  | 0  | 0  | 4  | 4  | 4  |
| 0  | 0  | 0  | 0  | 3  | 4  | 2  |
| 0  | 0  | 1  | 0  | 4  | 4  | 4  |
| 0  | 0  | 0  | 0  | 4  | 3  | 4  |
| 0  | 0  | 0  | 0  | 3  | 4  | 4  |
| 0  | 0  | 1  | 0  | 4  | 4  | 4  |
| 0  | 0  | 0  | 0  | 4  | 4  | 4  |
| 0  | 0  | 0  | 0  | 4  | 4  | 4  |

|    |   |   |   |    |    |    |
|----|---|---|---|----|----|----|
| 99 | 0 | 0 | 0 | 4  | 4  | 4  |
| 0  | 1 | 2 | 0 | 4  | 4  | 4  |
| 0  | 0 | 0 | 0 | 4  | 4  | 4  |
| 0  | 0 | 0 | 0 | 2  | 3  | 3  |
| 0  | 1 | 3 | 0 | 2  | 4  | 2  |
| 0  | 0 | 0 | 0 | 4  | 4  | 4  |
| 0  | 0 | 0 | 0 | 4  | 4  | 99 |
| 1  | 3 | 1 | 0 | 4  | 4  | 3  |
| 0  | 0 | 0 | 0 | 4  | 4  | 4  |
| 0  | 0 | 0 | 0 | 4  | 4  | 4  |
| 0  | 0 | 0 | 0 | 4  | 4  | 4  |
| 0  | 2 | 2 | 0 | 4  | 4  | 3  |
| 0  | 0 | 0 | 0 | 4  | 4  | 4  |
| 0  | 0 | 1 | 0 | 4  | 4  | 3  |
| 0  | 0 | 0 | 0 | 4  | 4  | 4  |
| 0  | 0 | 3 | 0 | 4  | 4  | 4  |
| 2  | 3 | 4 | 3 | 2  | 4  | 4  |
| 0  | 1 | 0 | 0 | 4  | 4  | 4  |
| 1  | 0 | 1 | 0 | 3  | 4  | 4  |
| 2  | 0 | 0 | 0 | 4  | 4  | 4  |
| 4  | 4 | 4 | 4 | 1  | 3  | 2  |
| 0  | 0 | 0 | 0 | 4  | 4  | 4  |
| 0  | 0 | 0 | 0 | 4  | 4  | 4  |
| 0  | 0 | 1 | 0 | 3  | 4  | 0  |
| 0  | 1 | 0 | 0 | 4  | 4  | 3  |
| 0  | 0 | 0 | 0 | 0  | 0  | 0  |
| 4  | 4 | 4 | 4 | 4  | 4  | 4  |
| 0  | 0 | 0 | 0 | 3  | 4  | 3  |
| 0  | 1 | 0 | 0 | 99 | 99 | 99 |
| 3  | 1 | 0 | 0 | 4  | 4  | 4  |
| 4  | 0 | 0 | 0 | 2  | 3  | 2  |
| 0  | 0 | 0 | 0 | 4  | 3  | 3  |
| 0  | 0 | 0 | 0 | 4  | 4  | 4  |
| 0  | 0 | 0 | 0 | 4  | 4  | 4  |
| 0  | 2 | 0 | 2 | 4  | 4  | 4  |
| 0  | 0 | 0 | 0 | 4  | 4  | 4  |
| 0  | 0 | 0 | 0 | 0  | 0  | 0  |
| 0  | 0 | 0 | 0 | 4  | 4  | 4  |
| 0  | 0 | 0 | 0 | 4  | 3  | 3  |
| 0  | 0 | 0 | 0 | 4  | 4  | 4  |
| 2  | 2 | 2 | 2 | 0  | 1  | 0  |
| 0  | 0 | 0 | 0 | 4  | 4  | 2  |
| 0  | 1 | 0 | 0 | 4  | 3  | 3  |
| 0  | 1 | 0 | 0 | 4  | 4  | 4  |
| 0  | 0 | 0 | 0 | 3  | 4  | 4  |
| 0  | 1 | 0 | 1 | 4  | 4  | 99 |
| 0  | 0 | 0 | 0 | 4  | 4  | 4  |
| 0  | 1 | 0 | 0 | 2  | 2  | 2  |

|    |    |    |    |    |    |    |
|----|----|----|----|----|----|----|
| 0  | 0  | 0  | 0  | 4  | 4  | 4  |
| 0  | 0  | 0  | 0  | 4  | 4  | 99 |
| 0  | 0  | 0  | 0  | 3  | 4  | 2  |
| 0  | 0  | 0  | 0  | 4  | 4  | 4  |
| 0  | 0  | 0  | 0  | 4  | 4  | 4  |
| 2  | 1  | 0  | 0  | 3  | 4  | 3  |
| 0  | 0  | 0  | 0  | 4  | 4  | 4  |
| 0  | 1  | 0  | 1  | 0  | 1  | 1  |
| 0  | 0  | 0  | 0  | 4  | 4  | 4  |
| 1  | 2  | 0  | 0  | 3  | 3  | 3  |
| 1  | 1  | 0  | 0  | 4  | 4  | 4  |
| 2  | 3  | 2  | 2  | 2  | 3  | 3  |
| 0  | 0  | 2  | 0  | 4  | 4  | 4  |
| 2  | 0  | 0  | 1  | 2  | 4  | 3  |
| 0  | 0  | 0  | 0  | 2  | 2  | 2  |
| 99 | 99 | 99 | 99 | 99 | 99 | 99 |
| 0  | 1  | 1  | 0  | 3  | 4  | 4  |
| 4  | 1  | 2  | 0  | 1  | 1  | 1  |
| 1  | 2  | 4  | 0  | 2  | 4  | 1  |
| 0  | 1  | 0  | 0  | 0  | 4  | 0  |
| 0  | 2  | 1  | 1  | 3  | 3  | 3  |
| 0  | 0  | 0  | 0  | 4  | 4  | 4  |
| 0  | 0  | 0  | 0  | 4  | 4  | 4  |
| 0  | 0  | 0  | 0  | 2  | 3  | 2  |
| 0  | 2  | 4  | 0  | 4  | 4  | 4  |
| 0  | 0  | 0  | 0  | 1  | 2  | 1  |
| 1  | 2  | 0  | 0  | 4  | 4  | 4  |
| 2  | 0  | 0  | 0  | 3  | 2  | 3  |
| 1  | 2  | 0  | 1  | 4  | 4  | 4  |
| 0  | 0  | 0  | 0  | 1  | 4  | 0  |
| 0  | 0  | 0  | 0  | 3  | 99 | 4  |
| 0  | 0  | 0  | 0  | 2  | 4  | 2  |
| 0  | 0  | 0  | 0  | 99 | 4  | 0  |
| 99 | 99 | 99 | 99 | 99 | 99 | 99 |
| 0  | 0  | 0  | 0  | 4  | 3  | 4  |
| 0  | 0  | 0  | 0  | 4  | 4  | 4  |
| 1  | 3  | 1  | 0  | 4  | 4  | 4  |
| 1  | 0  | 0  | 0  | 3  | 2  | 1  |
| 0  | 0  | 0  | 0  | 4  | 4  | 3  |
| 0  | 2  | 1  | 1  | 3  | 1  | 1  |
| 1  | 1  | 0  | 0  | 4  | 4  | 4  |
| 1  | 2  | 0  | 0  | 4  | 4  | 3  |
| 0  | 2  | 0  | 0  | 4  | 4  | 4  |
| 0  | 1  | 0  | 0  | 4  | 4  | 4  |
| 0  | 0  | 0  | 0  | 99 | 99 | 99 |
| 2  | 1  | 3  | 1  | 0  | 1  | 0  |
| 2  | 0  | 0  | 0  | 4  | 4  | 4  |
| 2  | 4  | 0  | 0  | 4  | 4  | 4  |

|   |   |    |   |    |    |    |
|---|---|----|---|----|----|----|
| 2 | 1 | 0  | 0 | 2  | 3  | 1  |
| 0 | 0 | 0  | 0 | 4  | 2  | 4  |
| 0 | 2 | 1  | 0 | 2  | 3  | 2  |
| 0 | 0 | 0  | 0 | 4  | 4  | 4  |
| 0 | 1 | 0  | 0 | 1  | 3  | 0  |
| 0 | 0 | 0  | 0 | 4  | 4  | 4  |
| 0 | 0 | 0  | 0 | 4  | 4  | 4  |
| 2 | 3 | 4  | 0 | 4  | 3  | 3  |
| 1 | 1 | 0  | 0 | 4  | 4  | 3  |
| 4 | 4 | 0  | 0 | 4  | 4  | 1  |
| 0 | 0 | 3  | 0 | 3  | 4  | 4  |
| 1 | 1 | 0  | 0 | 3  | 4  | 2  |
| 0 | 0 | 0  | 0 | 4  | 4  | 4  |
| 4 | 4 | 0  | 0 | 4  | 4  | 4  |
| 0 | 0 | 99 | 0 | 4  | 4  | 4  |
| 3 | 4 | 1  | 0 | 4  | 4  | 4  |
| 0 | 0 | 0  | 0 | 4  | 4  | 3  |
| 0 | 0 | 0  | 0 | 99 | 4  | 99 |
| 0 | 0 | 0  | 0 | 4  | 4  | 4  |
| 0 | 0 | 0  | 0 | 99 | 4  | 99 |
| 0 | 4 | 0  | 0 | 3  | 99 | 1  |
| 0 | 0 | 0  | 0 | 4  | 4  | 4  |
| 0 | 4 | 0  | 0 | 4  | 4  | 4  |
| 2 | 0 | 0  | 0 | 4  | 4  | 4  |
| 0 | 1 | 1  | 0 | 2  | 3  | 2  |
| 0 | 2 | 0  | 0 | 4  | 3  | 4  |
| 0 | 3 | 1  | 0 | 4  | 99 | 4  |
| 1 | 0 | 0  | 0 | 4  | 4  | 4  |
| 0 | 0 | 0  | 0 | 0  | 3  | 0  |
| 0 | 4 | 2  | 1 | 2  | 3  | 2  |
| 0 | 1 | 0  | 0 | 4  | 4  | 4  |
| 0 | 0 | 0  | 0 | 4  | 3  | 3  |
| 0 | 2 | 0  | 0 | 4  | 4  | 4  |
| 0 | 1 | 2  | 0 | 4  | 4  | 0  |
| 0 | 0 | 0  | 0 | 2  | 4  | 3  |
| 2 | 1 | 0  | 0 | 3  | 4  | 3  |
| 0 | 0 | 0  | 0 | 4  | 4  | 4  |
| 0 | 0 | 0  | 0 | 3  | 1  | 99 |
| 0 | 0 | 0  | 0 | 0  | 0  | 0  |
| 1 | 4 | 4  | 0 | 4  | 4  | 4  |
| 2 | 0 | 0  | 0 | 4  | 3  | 2  |
| 0 | 1 | 1  | 0 | 4  | 4  | 4  |
| 0 | 0 | 0  | 0 | 4  | 4  | 4  |
| 2 | 2 | 0  | 0 | 4  | 4  | 4  |
| 1 | 0 | 0  | 0 | 3  | 4  | 3  |
| 0 | 2 | 0  | 0 | 4  | 4  | 3  |
| 0 | 0 | 0  | 0 | 3  | 4  | 3  |
| 1 | 2 | 0  | 0 | 3  | 2  | 2  |

|    |    |    |    |    |    |    |
|----|----|----|----|----|----|----|
| 0  | 0  | 0  | 0  | 4  | 4  | 4  |
| 0  | 0  | 0  | 0  | 3  | 3  | 4  |
| 0  | 0  | 0  | 0  | 4  | 4  | 4  |
| 0  | 0  | 0  | 0  | 4  | 4  | 3  |
| 0  | 4  | 4  | 0  | 3  | 4  | 3  |
| 0  | 2  | 0  | 0  | 4  | 3  | 4  |
| 0  | 1  | 0  | 0  | 4  | 4  | 4  |
| 0  | 4  | 2  | 0  | 4  | 4  | 3  |
| 0  | 0  | 0  | 0  | 4  | 4  | 4  |
| 0  | 2  | 0  | 0  | 2  | 4  | 2  |
| 0  | 0  | 0  | 0  | 4  | 4  | 4  |
| 0  | 0  | 0  | 0  | 0  | 0  | 0  |
| 99 | 99 | 99 | 99 | 99 | 99 | 99 |
| 0  | 2  | 2  | 0  | 4  | 4  | 4  |
| 0  | 0  | 0  | 0  | 4  | 4  | 4  |
| 1  | 1  | 2  | 1  | 3  | 4  | 3  |
| 0  | 0  | 2  | 0  | 3  | 2  | 2  |
| 0  | 0  | 0  | 0  | 3  | 3  | 3  |
| 2  | 3  | 0  | 0  | 4  | 3  | 4  |
| 0  | 0  | 0  | 0  | 2  | 4  | 2  |
| 0  | 0  | 1  | 1  | 4  | 4  | 4  |
| 1  | 1  | 1  | 1  | 4  | 4  | 4  |
| 2  | 3  | 1  | 1  | 4  | 4  | 4  |
| 0  | 1  | 1  | 0  | 4  | 4  | 4  |
| 1  | 4  | 0  | 0  | 4  | 3  | 2  |
| 0  | 1  | 0  | 0  | 4  | 4  | 3  |
| 99 | 0  | 0  | 0  | 0  | 0  | 0  |
| 0  | 4  | 0  | 0  | 4  | 4  | 4  |
| 0  | 0  | 0  | 0  | 2  | 4  | 3  |
| 0  | 1  | 0  | 0  | 4  | 4  | 1  |
| 4  | 4  | 4  | 4  | 4  | 4  | 4  |
| 2  | 0  | 0  | 0  | 4  | 4  | 4  |
| 0  | 0  | 1  | 0  | 4  | 4  | 2  |
| 0  | 2  | 1  | 0  | 2  | 1  | 3  |
| 1  | 0  | 0  | 0  | 4  | 4  | 4  |
| 0  | 0  | 1  | 0  | 3  | 4  | 3  |
| 0  | 1  | 0  | 0  | 1  | 3  | 4  |
| 1  | 1  | 0  | 0  | 2  | 2  | 4  |
| 0  | 4  | 0  | 0  | 4  | 4  | 4  |
| 0  | 0  | 0  | 0  | 0  | 4  | 0  |
| 1  | 0  | 1  | 0  | 4  | 3  | 2  |
| 0  | 0  | 0  | 0  | 4  | 4  | 4  |
| 1  | 1  | 0  | 0  | 4  | 4  | 4  |
| 1  | 0  | 1  | 0  | 4  | 4  | 4  |
| 0  | 0  | 0  | 0  | 4  | 3  | 3  |
| 0  | 0  | 0  | 0  | 4  | 4  | 4  |
| 0  | 1  | 0  | 0  | 4  | 4  | 4  |
| 2  | 0  | 0  | 0  | 1  | 3  | 0  |

|   |   |   |   |   |   |    |
|---|---|---|---|---|---|----|
| 0 | 1 | 0 | 0 | 4 | 4 | 2  |
| 1 | 0 | 3 | 0 | 3 | 4 | 3  |
| 1 | 0 | 0 | 0 | 1 | 4 | 4  |
| 0 | 0 | 0 | 0 | 4 | 4 | 4  |
| 0 | 0 | 0 | 0 | 4 | 4 | 4  |
| 0 | 0 | 1 | 0 | 3 | 4 | 0  |
| 0 | 0 | 0 | 0 | 2 | 2 | 2  |
| 0 | 0 | 0 | 0 | 4 | 4 | 0  |
| 0 | 0 | 0 | 0 | 4 | 4 | 4  |
| 0 | 0 | 0 | 0 | 4 | 4 | 4  |
| 0 | 1 | 0 | 0 | 4 | 4 | 4  |
| 0 | 2 | 2 | 0 | 3 | 4 | 3  |
| 0 | 1 | 0 | 0 | 2 | 3 | 2  |
| 1 | 4 | 0 | 0 | 4 | 4 | 4  |
| 0 | 0 | 0 | 0 | 4 | 4 | 4  |
| 3 | 2 | 0 | 1 | 4 | 4 | 3  |
| 0 | 0 | 0 | 0 | 0 | 0 | 0  |
| 0 | 1 | 0 | 0 | 4 | 3 | 4  |
| 0 | 2 | 0 | 0 | 3 | 2 | 3  |
| 1 | 4 | 0 | 0 | 0 | 2 | 0  |
| 0 | 1 | 0 | 0 | 4 | 3 | 2  |
| 4 | 4 | 4 | 4 | 4 | 4 | 4  |
| 1 | 0 | 0 | 0 | 4 | 4 | 4  |
| 0 | 0 | 0 | 0 | 2 | 4 | 4  |
| 0 | 4 | 0 | 0 | 1 | 3 | 1  |
| 2 | 1 | 1 | 0 | 0 | 1 | 1  |
| 0 | 0 | 1 | 0 | 4 | 4 | 3  |
| 0 | 0 | 0 | 0 | 4 | 4 | 4  |
| 0 | 1 | 0 | 0 | 3 | 2 | 3  |
| 0 | 0 | 0 | 0 | 4 | 4 | 4  |
| 1 | 3 | 3 | 1 | 4 | 4 | 4  |
| 3 | 2 | 3 | 0 | 3 | 2 | 4  |
| 1 | 0 | 0 | 0 | 4 | 4 | 99 |
| 0 | 2 | 0 | 0 | 3 | 2 | 2  |
| 0 | 0 | 0 | 0 | 4 | 3 | 3  |
| 0 | 1 | 0 | 0 | 4 | 4 | 4  |
| 0 | 2 | 0 | 0 | 4 | 4 | 4  |
| 1 | 1 | 0 | 0 | 3 | 3 | 3  |
| 0 | 0 | 1 | 0 | 4 | 3 | 2  |
| 0 | 0 | 2 | 0 | 4 | 3 | 4  |
| 0 | 0 | 0 | 0 | 4 | 4 | 4  |
| 0 | 0 | 0 | 0 | 4 | 4 | 4  |
| 0 | 0 | 0 | 0 | 2 | 4 | 4  |
| 0 | 2 | 2 | 0 | 4 | 4 | 4  |
| 2 | 0 | 0 | 0 | 3 | 4 | 3  |
| 0 | 0 | 0 | 0 | 4 | 4 | 4  |
| 0 | 1 | 1 | 0 | 4 | 3 | 3  |
| 1 | 0 | 0 | 0 | 4 | 4 | 4  |

|    |   |   |   |   |   |   |
|----|---|---|---|---|---|---|
| 0  | 2 | 0 | 0 | 3 | 4 | 3 |
| 2  | 0 | 0 | 0 | 0 | 1 | 0 |
| 0  | 0 | 0 | 0 | 4 | 4 | 4 |
| 0  | 0 | 0 | 0 | 3 | 2 | 2 |
| 2  | 0 | 0 | 0 | 3 | 3 | 2 |
| 1  | 0 | 0 | 0 | 4 | 4 | 4 |
| 0  | 0 | 0 | 0 | 3 | 4 | 4 |
| 3  | 1 | 0 | 0 | 1 | 3 | 1 |
| 1  | 0 | 0 | 0 | 4 | 4 | 3 |
| 0  | 0 | 1 | 0 | 3 | 4 | 3 |
| 0  | 0 | 0 | 0 | 4 | 3 | 4 |
| 0  | 1 | 1 | 0 | 2 | 2 | 2 |
| 1  | 1 | 0 | 0 | 4 | 4 | 4 |
| 1  | 1 | 3 | 0 | 4 | 4 | 4 |
| 0  | 0 | 0 | 0 | 4 | 4 | 4 |
| 1  | 4 | 3 | 0 | 3 | 4 | 4 |
| 99 | 1 | 0 | 1 | 2 | 3 | 2 |
| 0  | 0 | 0 | 0 | 0 | 0 | 0 |
| 3  | 2 | 2 | 0 | 4 | 4 | 4 |
| 1  | 0 | 0 | 0 | 4 | 4 | 4 |
| 0  | 0 | 0 | 0 | 2 | 3 | 2 |
| 0  | 0 | 0 | 0 | 4 | 3 | 4 |
| 0  | 0 | 0 | 0 | 2 | 3 | 2 |
| 0  | 0 | 0 | 0 | 0 | 0 | 0 |
| 1  | 0 | 0 | 0 | 2 | 4 | 4 |
| 0  | 0 | 0 | 0 | 4 | 4 | 4 |
| 0  | 0 | 0 | 0 | 2 | 1 | 2 |
| 1  | 2 | 1 | 0 | 4 | 4 | 4 |
| 0  | 0 | 0 | 0 | 3 | 3 | 3 |
| 0  | 0 | 0 | 0 | 4 | 4 | 3 |
| 1  | 1 | 0 | 0 | 4 | 4 | 3 |
| 1  | 0 | 0 | 0 | 3 | 4 | 3 |
| 0  | 0 | 0 | 0 | 3 | 4 | 4 |
| 0  | 0 | 0 | 0 | 4 | 4 | 4 |
| 4  | 4 | 1 | 0 | 4 | 4 | 4 |
| 0  | 1 | 0 | 0 | 2 | 3 | 1 |
| 0  | 0 | 0 | 0 | 0 | 0 | 0 |
| 0  | 1 | 0 | 0 | 4 | 4 | 4 |
| 2  | 4 | 2 | 0 | 4 | 4 | 2 |
| 0  | 0 | 0 | 0 | 4 | 4 | 4 |
| 0  | 1 | 1 | 1 | 4 | 4 | 4 |
| 3  | 2 | 2 | 0 | 2 | 2 | 2 |
| 2  | 4 | 3 | 3 | 0 | 1 | 2 |
| 0  | 0 | 0 | 1 | 4 | 4 | 4 |
| 0  | 0 | 0 | 0 | 4 | 4 | 4 |
| 2  | 1 | 4 | 0 | 4 | 4 | 3 |
| 0  | 0 | 0 | 1 | 4 | 4 | 4 |
| 0  | 0 | 0 | 0 | 4 | 4 | 4 |

|    |    |    |    |    |    |    |
|----|----|----|----|----|----|----|
| 0  | 2  | 2  | 0  | 4  | 4  | 4  |
| 0  | 0  | 0  | 0  | 0  | 2  | 0  |
| 0  | 0  | 0  | 0  | 4  | 4  | 3  |
| 0  | 0  | 0  | 0  | 4  | 4  | 3  |
| 99 | 99 | 99 | 99 | 99 | 99 | 99 |
| 0  | 2  | 0  | 0  | 4  | 4  | 3  |
| 0  | 0  | 0  | 0  | 4  | 4  | 4  |
| 0  | 0  | 0  | 0  | 4  | 4  | 4  |
| 2  | 2  | 0  | 0  | 4  | 4  | 4  |
| 0  | 0  | 0  | 0  | 4  | 4  | 4  |
| 2  | 4  | 0  | 0  | 4  | 4  | 4  |
| 0  | 1  | 0  | 0  | 4  | 4  | 4  |
| 2  | 0  | 0  | 0  | 4  | 4  | 4  |
| 0  | 1  | 0  | 0  | 4  | 4  | 4  |
| 99 | 0  | 0  | 0  | 0  | 4  | 0  |
| 0  | 4  | 4  | 3  | 4  | 4  | 4  |
| 0  | 4  | 0  | 0  | 2  | 4  | 99 |
| 3  | 2  | 2  | 0  | 1  | 0  | 1  |
| 1  | 1  | 0  | 0  | 4  | 4  | 4  |
| 0  | 0  | 0  | 0  | 4  | 4  | 3  |
| 0  | 4  | 0  | 0  | 2  | 2  | 1  |
| 4  | 0  | 0  | 0  | 4  | 4  | 4  |
| 0  | 2  | 1  | 0  | 4  | 4  | 4  |
| 0  | 0  | 0  | 0  | 4  | 4  | 4  |
| 4  | 4  | 0  | 0  | 4  | 4  | 2  |
| 0  | 0  | 0  | 0  | 4  | 4  | 4  |
| 0  | 0  | 0  | 0  | 4  | 3  | 4  |
| 0  | 1  | 1  | 0  | 4  | 4  | 4  |
| 1  | 4  | 0  | 0  | 3  | 2  | 3  |
| 0  | 0  | 0  | 0  | 4  | 4  | 4  |
| 0  | 0  | 0  | 0  | 4  | 4  | 4  |
| 1  | 1  | 0  | 0  | 4  | 4  | 99 |
| 0  | 0  | 0  | 0  | 4  | 4  | 4  |
| 0  | 0  | 0  | 0  | 4  | 4  | 3  |
| 1  | 4  | 2  | 0  | 2  | 0  | 1  |
| 0  | 0  | 0  | 0  | 3  | 1  | 3  |
| 0  | 2  | 0  | 0  | 2  | 4  | 2  |
| 0  | 1  | 0  | 0  | 4  | 4  | 3  |
| 1  | 0  | 1  | 0  | 3  | 3  | 4  |
| 0  | 0  | 1  | 0  | 3  | 3  | 0  |
| 0  | 2  | 0  | 0  | 4  | 4  | 4  |
| 0  | 0  | 0  | 0  | 4  | 4  | 4  |
| 0  | 0  | 0  | 0  | 4  | 4  | 4  |
| 0  | 0  | 0  | 0  | 4  | 4  | 4  |
| 0  | 0  | 0  | 0  | 3  | 4  | 3  |
| 2  | 4  | 4  | 0  | 4  | 4  | 4  |
| 0  | 1  | 0  | 0  | 4  | 4  | 3  |
| 1  | 0  | 0  | 0  | 4  | 4  | 3  |



|   |    |   |   |    |    |    |
|---|----|---|---|----|----|----|
| 0 | 1  | 0 | 0 | 4  | 4  | 4  |
| 0 | 2  | 0 | 0 | 4  | 4  | 3  |
| 0 | 1  | 0 | 2 | 4  | 4  | 4  |
| 1 | 2  | 2 | 0 | 4  | 4  | 3  |
| 0 | 2  | 2 | 0 | 4  | 4  | 4  |
| 0 | 4  | 0 | 0 | 4  | 4  | 2  |
| 0 | 0  | 0 | 0 | 4  | 4  | 4  |
| 2 | 3  | 3 | 4 | 4  | 4  | 4  |
| 1 | 1  | 3 | 1 | 0  | 1  | 1  |
| 0 | 0  | 0 | 0 | 4  | 4  | 4  |
| 0 | 1  | 0 | 0 | 4  | 4  | 4  |
| 1 | 0  | 0 | 0 | 99 | 99 | 99 |
| 0 | 0  | 0 | 0 | 4  | 3  | 3  |
| 2 | 2  | 4 | 0 | 1  | 2  | 1  |
| 0 | 0  | 0 | 0 | 4  | 4  | 4  |
| 0 | 1  | 0 | 0 | 3  | 4  | 3  |
| 0 | 0  | 0 | 0 | 4  | 4  | 4  |
| 1 | 99 | 0 | 0 | 2  | 4  | 2  |
| 0 | 0  | 0 | 0 | 4  | 4  | 4  |
| 0 | 0  | 0 | 0 | 4  | 4  | 3  |
| 0 | 0  | 0 | 0 | 4  | 4  | 4  |
| 0 | 0  | 0 | 0 | 4  | 4  | 4  |
| 0 | 1  | 0 | 0 | 2  | 3  | 2  |
| 4 | 4  | 4 | 3 | 4  | 4  | 4  |
| 0 | 0  | 0 | 0 | 4  | 4  | 4  |
| 0 | 1  | 1 | 0 | 4  | 4  | 4  |
| 2 | 0  | 0 | 0 | 2  | 4  | 2  |
| 0 | 0  | 0 | 0 | 4  | 4  | 4  |
| 1 | 1  | 2 | 0 | 3  | 4  | 1  |
| 0 | 0  | 0 | 0 | 4  | 4  | 4  |
| 0 | 0  | 0 | 0 | 4  | 4  | 4  |
| 3 | 4  | 2 | 4 | 4  | 4  | 4  |
| 0 | 0  | 0 | 0 | 3  | 4  | 3  |
| 4 | 0  | 0 | 0 | 0  | 1  | 1  |
| 0 | 0  | 2 | 0 | 4  | 4  | 0  |
| 0 | 1  | 2 | 0 | 4  | 4  | 4  |
| 0 | 0  | 0 | 0 | 4  | 4  | 4  |
| 1 | 4  | 1 | 0 | 2  | 3  | 3  |
| 0 | 0  | 0 | 0 | 3  | 4  | 3  |
| 0 | 0  | 0 | 0 | 2  | 2  | 1  |
| 0 | 0  | 0 | 0 | 4  | 4  | 4  |
| 0 | 0  | 0 | 0 | 4  | 4  | 4  |
| 0 | 1  | 0 | 0 | 4  | 3  | 4  |
| 0 | 0  | 0 | 0 | 2  | 4  | 2  |
| 0 | 1  | 0 | 0 | 4  | 4  | 3  |
| 0 | 2  | 2 | 0 | 4  | 4  | 4  |
| 0 | 0  | 0 | 0 | 1  | 1  | 1  |
| 0 | 0  | 0 | 0 | 4  | 4  | 4  |

|    |    |    |    |    |    |    |
|----|----|----|----|----|----|----|
| 99 | 99 | 0  | 0  | 4  | 4  | 3  |
| 2  | 3  | 3  | 0  | 3  | 3  | 3  |
| 0  | 0  | 0  | 0  | 2  | 2  | 2  |
| 0  | 0  | 0  | 0  | 2  | 3  | 2  |
| 99 | 99 | 99 | 99 | 99 | 99 | 99 |
| 0  | 0  | 0  | 0  | 4  | 4  | 4  |
| 0  | 0  | 0  | 0  | 4  | 4  | 4  |
| 0  | 0  | 0  | 0  | 0  | 0  | 0  |
| 0  | 0  | 0  | 0  | 2  | 3  | 3  |
| 1  | 0  | 1  | 0  | 4  | 4  | 4  |
| 0  | 0  | 0  | 0  | 4  | 4  | 3  |
| 0  | 99 | 2  | 0  | 2  | 1  | 1  |
| 0  | 1  | 0  | 0  | 4  | 4  | 3  |
| 0  | 1  | 4  | 0  | 0  | 4  | 4  |
| 0  | 0  | 0  | 0  | 0  | 4  | 1  |
| 0  | 0  | 0  | 0  | 3  | 3  | 3  |
| 0  | 1  | 0  | 1  | 0  | 0  | 0  |
| 0  | 4  | 3  | 0  | 4  | 4  | 4  |
| 4  | 3  | 3  | 1  | 0  | 2  | 1  |
| 0  | 0  | 0  | 0  | 4  | 4  | 3  |
| 0  | 0  | 0  | 0  | 99 | 99 | 99 |
| 0  | 2  | 0  | 0  | 3  | 4  | 4  |
| 0  | 0  | 0  | 0  | 4  | 4  | 4  |
| 0  | 0  | 0  | 0  | 4  | 4  | 4  |
| 0  | 0  | 0  | 0  | 4  | 4  | 4  |
| 4  | 3  | 1  | 0  | 2  | 4  | 1  |
| 0  | 0  | 0  | 0  | 4  | 4  | 4  |
| 0  | 0  | 0  | 0  | 2  | 4  | 3  |
| 0  | 1  | 0  | 0  | 4  | 4  | 4  |
| 0  | 0  | 0  | 0  | 4  | 4  | 3  |
| 1  | 2  | 1  | 0  | 3  | 4  | 4  |
| 0  | 1  | 0  | 0  | 2  | 3  | 3  |
| 2  | 2  | 4  | 0  | 3  | 2  | 2  |
| 0  | 1  | 0  | 0  | 4  | 4  | 4  |
| 0  | 0  | 0  | 0  | 2  | 3  | 2  |
| 4  | 0  | 0  | 0  | 0  | 2  | 3  |
| 1  | 0  | 2  | 0  | 4  | 4  | 4  |
| 0  | 0  | 0  | 0  | 4  | 4  | 4  |
| 1  | 0  | 0  | 0  | 3  | 4  | 4  |
| 0  | 1  | 0  | 0  | 4  | 4  | 4  |
| 1  | 0  | 0  | 0  | 0  | 1  | 0  |
| 0  | 2  | 0  | 0  | 4  | 3  | 4  |
| 0  | 2  | 0  | 0  | 3  | 3  | 3  |
| 0  | 0  | 0  | 0  | 3  | 3  | 2  |
| 0  | 1  | 0  | 0  | 2  | 1  | 4  |
| 0  | 2  | 2  | 3  | 2  | 1  | 3  |
| 2  | 4  | 2  | 0  | 1  | 1  | 1  |
| 0  | 0  | 0  | 0  | 3  | 4  | 3  |

|    |    |    |    |   |   |   |
|----|----|----|----|---|---|---|
| 2  | 0  | 0  | 0  | 1 | 2 | 2 |
| 0  | 1  | 1  | 0  | 3 | 4 | 3 |
| 0  | 0  | 0  | 0  | 3 | 4 | 4 |
| 0  | 1  | 0  | 0  | 3 | 4 | 0 |
| 0  | 0  | 0  | 0  | 4 | 4 | 4 |
| 2  | 2  | 0  | 0  | 3 | 4 | 3 |
| 0  | 0  | 0  | 0  | 4 | 4 | 4 |
| 0  | 1  | 0  | 0  | 2 | 2 | 1 |
| 0  | 1  | 0  | 0  | 4 | 4 | 4 |
| 99 | 4  | 4  | 4  | 4 | 3 | 2 |
| 4  | 0  | 0  | 0  | 4 | 4 | 2 |
| 1  | 1  | 1  | 0  | 2 | 1 | 1 |
| 4  | 0  | 0  | 0  | 4 | 4 | 4 |
| 1  | 0  | 0  | 0  | 4 | 4 | 3 |
| 0  | 0  | 1  | 0  | 4 | 2 | 2 |
| 3  | 1  | 0  | 0  | 3 | 2 | 4 |
| 1  | 0  | 0  | 0  | 3 | 4 | 2 |
| 0  | 1  | 0  | 0  | 4 | 4 | 4 |
| 1  | 2  | 1  | 1  | 4 | 4 | 4 |
| 0  | 99 | 0  | 0  | 4 | 4 | 4 |
| 0  | 1  | 1  | 0  | 4 | 4 | 4 |
| 0  | 0  | 0  | 0  | 4 | 4 | 4 |
| 0  | 0  | 0  | 0  | 4 | 4 | 4 |
| 0  | 0  | 2  | 0  | 4 | 4 | 4 |
| 0  | 0  | 0  | 0  | 3 | 4 | 3 |
| 2  | 4  | 2  | 1  | 4 | 4 | 3 |
| 0  | 0  | 0  | 0  | 2 | 3 | 2 |
| 0  | 0  | 0  | 0  | 4 | 4 | 4 |
| 0  | 0  | 0  | 0  | 4 | 4 | 4 |
| 0  | 1  | 0  | 0  | 4 | 4 | 3 |
| 0  | 2  | 0  | 0  | 4 | 4 | 4 |
| 0  | 2  | 0  | 0  | 3 | 4 | 2 |
| 1  | 0  | 1  | 0  | 2 | 4 | 1 |
| 3  | 0  | 0  | 0  | 3 | 4 | 3 |
| 2  | 2  | 2  | 0  | 3 | 3 | 2 |
| 0  | 0  | 1  | 0  | 3 | 3 | 2 |
| 0  | 1  | 2  | 0  | 4 | 4 | 4 |
| 0  | 0  | 4  | 0  | 2 | 4 | 2 |
| 0  | 2  | 0  | 0  | 3 | 4 | 2 |
| 2  | 2  | 2  | 0  | 4 | 4 | 4 |
| 2  | 2  | 0  | 0  | 3 | 2 | 1 |
| 0  | 0  | 0  | 0  | 4 | 4 | 4 |
| 0  | 0  | 4  | 4  | 0 | 2 | 0 |
| 99 | 99 | 99 | 99 | 1 | 1 | 1 |
| 0  | 3  | 0  | 0  | 4 | 4 | 3 |
| 0  | 2  | 0  | 0  | 4 | 4 | 4 |
| 1  | 0  | 0  | 0  | 4 | 4 | 4 |
| 0  | 0  | 0  | 0  | 3 | 4 | 3 |
| 2  | 3  | 1  | 2  | 4 | 4 | 4 |

|    |    |    |    |   |   |    |
|----|----|----|----|---|---|----|
| 2  | 1  | 2  | 0  | 3 | 2 | 2  |
| 0  | 0  | 0  | 0  | 4 | 4 | 4  |
| 2  | 3  | 3  | 0  | 4 | 4 | 3  |
| 4  | 4  | 2  | 0  | 2 | 3 | 2  |
| 0  | 1  | 1  | 0  | 3 | 3 | 3  |
| 0  | 2  | 0  | 0  | 3 | 4 | 4  |
| 0  | 0  | 0  | 0  | 4 | 4 | 4  |
| 0  | 0  | 1  | 0  | 4 | 4 | 4  |
| 0  | 0  | 0  | 0  | 4 | 4 | 4  |
| 0  | 1  | 0  | 0  | 4 | 4 | 4  |
| 0  | 0  | 0  | 0  | 0 | 0 | 0  |
| 0  | 3  | 2  | 0  | 4 | 4 | 4  |
| 2  | 0  | 0  | 0  | 1 | 3 | 1  |
| 1  | 1  | 0  | 0  | 3 | 3 | 4  |
| 0  | 2  | 0  | 1  | 2 | 2 | 2  |
| 0  | 1  | 0  | 1  | 2 | 2 | 2  |
| 0  | 2  | 2  | 0  | 3 | 4 | 2  |
| 0  | 1  | 0  | 0  | 4 | 4 | 4  |
| 0  | 1  | 0  | 1  | 4 | 4 | 4  |
| 4  | 2  | 1  | 2  | 4 | 1 | 99 |
| 0  | 0  | 0  | 0  | 3 | 4 | 3  |
| 4  | 2  | 2  | 0  | 4 | 4 | 3  |
| 0  | 0  | 0  | 0  | 3 | 3 | 3  |
| 0  | 4  | 0  | 0  | 4 | 4 | 4  |
| 2  | 2  | 2  | 0  | 4 | 4 | 4  |
| 0  | 0  | 0  | 0  | 4 | 2 | 2  |
| 0  | 0  | 0  | 0  | 2 | 2 | 2  |
| 99 | 99 | 99 | 99 | 3 | 4 | 4  |
| 2  | 0  | 0  | 0  | 3 | 3 | 3  |
| 0  | 0  | 0  | 0  | 4 | 4 | 4  |
| 99 | 99 | 99 | 99 | 4 | 3 | 3  |
| 0  | 0  | 1  | 0  | 4 | 4 | 4  |
| 0  | 0  | 0  | 0  | 3 | 2 | 3  |
| 0  | 0  | 0  | 0  | 3 | 3 | 3  |
| 3  | 2  | 0  | 2  | 2 | 2 | 4  |
| 0  | 0  | 1  | 0  | 4 | 4 | 4  |
| 1  | 2  | 2  | 0  | 4 | 4 | 4  |
| 0  | 0  | 0  | 0  | 4 | 4 | 4  |
| 99 | 99 | 99 | 99 | 4 | 4 | 4  |
| 0  | 0  | 0  | 0  | 3 | 4 | 3  |
| 0  | 0  | 0  | 0  | 4 | 4 | 4  |
| 0  | 0  | 0  | 0  | 0 | 0 | 0  |
| 0  | 1  | 1  | 0  | 3 | 4 | 3  |
| 4  | 0  | 0  | 0  | 4 | 4 | 4  |
| 0  | 0  | 0  | 0  | 3 | 4 | 4  |
| 0  | 0  | 0  | 0  | 4 | 4 | 4  |
| 0  | 1  | 0  | 0  | 4 | 4 | 4  |
| 0  | 0  | 0  | 0  | 4 | 4 | 4  |

|   |   |   |   |   |   |    |
|---|---|---|---|---|---|----|
| 2 | 0 | 0 | 0 | 4 | 3 | 3  |
| 0 | 4 | 0 | 0 | 4 | 4 | 4  |
| 1 | 4 | 4 | 4 | 2 | 0 | 4  |
| 1 | 1 | 0 | 0 | 3 | 4 | 4  |
| 3 | 1 | 0 | 0 | 2 | 1 | 2  |
| 2 | 3 | 3 | 0 | 1 | 4 | 2  |
| 0 | 0 | 0 | 0 | 4 | 4 | 4  |
| 1 | 1 | 1 | 1 | 0 | 0 | 0  |
| 0 | 0 | 0 | 0 | 2 | 2 | 2  |
| 0 | 0 | 0 | 0 | 0 | 0 | 0  |
| 3 | 2 | 2 | 0 | 3 | 4 | 2  |
| 0 | 2 | 1 | 0 | 2 | 4 | 1  |
| 0 | 0 | 1 | 0 | 4 | 4 | 4  |
| 0 | 1 | 1 | 0 | 2 | 2 | 2  |
| 0 | 1 | 2 | 0 | 4 | 4 | 3  |
| 2 | 0 | 0 | 0 | 2 | 3 | 2  |
| 1 | 4 | 2 | 2 | 0 | 1 | 0  |
| 0 | 1 | 0 | 0 | 4 | 4 | 4  |
| 0 | 0 | 0 | 0 | 3 | 4 | 4  |
| 2 | 0 | 0 | 0 | 4 | 4 | 4  |
| 0 | 2 | 2 | 0 | 4 | 4 | 4  |
| 0 | 1 | 0 | 0 | 4 | 4 | 4  |
| 0 | 0 | 0 | 0 | 4 | 4 | 3  |
| 0 | 0 | 0 | 0 | 4 | 3 | 2  |
| 0 | 0 | 0 | 0 | 2 | 2 | 2  |
| 0 | 0 | 0 | 0 | 3 | 4 | 2  |
| 0 | 0 | 0 | 0 | 4 | 4 | 4  |
| 0 | 1 | 0 | 0 | 4 | 4 | 4  |
| 0 | 4 | 4 | 4 | 2 | 0 | 99 |
| 0 | 0 | 0 | 0 | 4 | 4 | 4  |
| 0 | 2 | 0 | 0 | 4 | 4 | 4  |
| 0 | 0 | 0 | 0 | 4 | 4 | 4  |
| 2 | 1 | 4 | 1 | 2 | 3 | 2  |
| 0 | 0 | 0 | 0 | 4 | 4 | 4  |
| 0 | 0 | 0 | 0 | 3 | 4 | 3  |
| 0 | 4 | 2 | 0 | 4 | 4 | 4  |
| 1 | 4 | 0 | 0 | 4 | 4 | 3  |
| 0 | 0 | 0 | 0 | 4 | 4 | 4  |
| 1 | 0 | 2 | 0 | 2 | 4 | 4  |
| 0 | 0 | 0 | 0 | 4 | 4 | 4  |
| 4 | 4 | 1 | 4 | 4 | 4 | 4  |
| 0 | 0 | 0 | 0 | 4 | 4 | 4  |
| 0 | 0 | 2 | 0 | 2 | 4 | 3  |
| 1 | 2 | 1 | 3 | 4 | 3 | 4  |
| 0 | 0 | 0 | 0 | 3 | 4 | 3  |
| 1 | 2 | 0 | 0 | 4 | 4 | 3  |
| 2 | 1 | 0 | 0 | 4 | 4 | 4  |
| 0 | 1 | 0 | 0 | 4 | 4 | 4  |

|   |   |    |   |    |   |    |
|---|---|----|---|----|---|----|
| 0 | 4 | 4  | 4 | 0  | 0 | 0  |
| 3 | 1 | 0  | 0 | 4  | 4 | 1  |
| 0 | 1 | 0  | 0 | 4  | 4 | 4  |
| 0 | 1 | 0  | 0 | 4  | 4 | 4  |
| 0 | 0 | 0  | 0 | 4  | 4 | 4  |
| 0 | 0 | 0  | 0 | 99 | 4 | 3  |
| 0 | 0 | 0  | 0 | 0  | 0 | 0  |
| 2 | 4 | 4  | 0 | 0  | 1 | 0  |
| 4 | 4 | 4  | 0 | 1  | 0 | 4  |
| 0 | 0 | 0  | 0 | 4  | 4 | 3  |
| 0 | 2 | 2  | 0 | 4  | 4 | 4  |
| 0 | 0 | 0  | 0 | 4  | 4 | 4  |
| 0 | 0 | 0  | 0 | 3  | 4 | 3  |
| 0 | 0 | 99 | 0 | 3  | 3 | 3  |
| 1 | 0 | 0  | 0 | 4  | 4 | 4  |
| 0 | 0 | 0  | 0 | 2  | 1 | 1  |
| 0 | 1 | 2  | 0 | 4  | 4 | 4  |
| 0 | 0 | 0  | 0 | 3  | 2 | 3  |
| 2 | 2 | 4  | 0 | 3  | 3 | 3  |
| 0 | 0 | 0  | 0 | 4  | 4 | 3  |
| 4 | 0 | 0  | 0 | 4  | 3 | 2  |
| 0 | 2 | 2  | 0 | 3  | 4 | 3  |
| 2 | 3 | 2  | 0 | 3  | 3 | 3  |
| 0 | 1 | 0  | 0 | 4  | 4 | 4  |
| 0 | 0 | 0  | 0 | 4  | 4 | 3  |
| 0 | 0 | 0  | 1 | 4  | 4 | 4  |
| 0 | 0 | 0  | 0 | 4  | 4 | 4  |
| 0 | 0 | 0  | 0 | 4  | 4 | 4  |
| 0 | 0 | 0  | 0 | 4  | 4 | 4  |
| 0 | 0 | 0  | 0 | 4  | 4 | 4  |
| 0 | 0 | 1  | 0 | 4  | 4 | 4  |
| 0 | 0 | 0  | 0 | 4  | 4 | 4  |
| 0 | 2 | 1  | 0 | 3  | 3 | 2  |
| 0 | 0 | 0  | 0 | 4  | 4 | 4  |
| 0 | 4 | 0  | 0 | 4  | 4 | 4  |
| 0 | 0 | 0  | 0 | 2  | 3 | 3  |
| 0 | 0 | 0  | 0 | 4  | 4 | 4  |
| 0 | 0 | 1  | 0 | 2  | 2 | 0  |
| 1 | 1 | 0  | 0 | 4  | 4 | 4  |
| 0 | 1 | 1  | 1 | 3  | 3 | 4  |
| 0 | 3 | 2  | 0 | 1  | 4 | 2  |
| 2 | 3 | 0  | 0 | 4  | 4 | 4  |
| 0 | 2 | 0  | 0 | 0  | 1 | 0  |
| 1 | 1 | 1  | 0 | 4  | 4 | 4  |
| 0 | 0 | 0  | 0 | 1  | 1 | 1  |
| 0 | 0 | 0  | 0 | 4  | 4 | 99 |
| 0 | 0 | 1  | 0 | 3  | 3 | 1  |
| 0 | 1 | 0  | 0 | 4  | 4 | 4  |

|    |    |   |   |    |    |    |
|----|----|---|---|----|----|----|
| 0  | 0  | 0 | 0 | 4  | 4  | 4  |
| 0  | 0  | 0 | 0 | 3  | 3  | 3  |
| 0  | 0  | 0 | 0 | 4  | 4  | 4  |
| 0  | 0  | 0 | 0 | 4  | 4  | 4  |
| 0  | 2  | 1 | 0 | 4  | 4  | 4  |
| 0  | 0  | 0 | 0 | 0  | 0  | 0  |
| 0  | 0  | 0 | 0 | 0  | 0  | 0  |
| 0  | 0  | 0 | 0 | 4  | 4  | 4  |
| 0  | 0  | 0 | 0 | 4  | 4  | 4  |
| 1  | 0  | 0 | 0 | 4  | 4  | 4  |
| 0  | 2  | 1 | 0 | 2  | 3  | 3  |
| 2  | 2  | 3 | 0 | 3  | 4  | 3  |
| 0  | 0  | 0 | 0 | 3  | 4  | 3  |
| 1  | 1  | 0 | 0 | 3  | 4  | 3  |
| 0  | 0  | 0 | 0 | 3  | 4  | 3  |
| 0  | 0  | 0 | 0 | 4  | 4  | 4  |
| 2  | 2  | 2 | 2 | 4  | 4  | 4  |
| 0  | 2  | 2 | 0 | 3  | 4  | 3  |
| 99 | 2  | 3 | 0 | 1  | 4  | 4  |
| 4  | 2  | 0 | 0 | 2  | 0  | 2  |
| 0  | 1  | 0 | 0 | 2  | 2  | 2  |
| 0  | 0  | 0 | 0 | 4  | 4  | 4  |
| 2  | 2  | 0 | 0 | 4  | 4  | 4  |
| 0  | 0  | 1 | 0 | 2  | 4  | 4  |
| 0  | 0  | 0 | 0 | 2  | 4  | 4  |
| 0  | 1  | 2 | 0 | 4  | 4  | 4  |
| 2  | 0  | 1 | 0 | 4  | 4  | 3  |
| 2  | 1  | 3 | 3 | 4  | 4  | 4  |
| 0  | 0  | 0 | 0 | 4  | 4  | 2  |
| 2  | 0  | 2 | 0 | 4  | 4  | 0  |
| 99 | 99 | 2 | 0 | 4  | 4  | 4  |
| 0  | 0  | 0 | 0 | 3  | 4  | 4  |
| 0  | 2  | 0 | 0 | 4  | 4  | 4  |
| 0  | 0  | 0 | 0 | 4  | 4  | 4  |
| 1  | 0  | 1 | 0 | 3  | 4  | 2  |
| 0  | 0  | 0 | 0 | 4  | 4  | 4  |
| 0  | 0  | 0 | 0 | 4  | 4  | 4  |
| 0  | 0  | 0 | 0 | 4  | 4  | 4  |
| 0  | 0  | 0 | 0 | 99 | 99 | 99 |
| 1  | 1  | 0 | 0 | 3  | 2  | 3  |
| 0  | 0  | 0 | 0 | 3  | 3  | 3  |
| 0  | 1  | 0 | 0 | 4  | 4  | 4  |
| 0  | 0  | 0 | 0 | 4  | 4  | 4  |
| 0  | 0  | 0 | 0 | 4  | 4  | 4  |
| 0  | 0  | 0 | 0 | 4  | 4  | 4  |
| 4  | 0  | 1 | 0 | 4  | 4  | 3  |
| 0  | 0  | 0 | 0 | 4  | 4  | 4  |
| 1  | 0  | 0 | 0 | 4  | 4  | 4  |
| 0  | 0  | 0 | 0 | 4  | 4  | 4  |

|    |   |   |   |   |   |    |
|----|---|---|---|---|---|----|
| 0  | 0 | 0 | 0 | 4 | 4 | 3  |
| 0  | 0 | 0 | 0 | 4 | 4 | 4  |
| 0  | 0 | 0 | 0 | 4 | 4 | 4  |
| 0  | 1 | 0 | 0 | 4 | 4 | 4  |
| 0  | 0 | 0 | 0 | 4 | 4 | 4  |
| 0  | 0 | 0 | 0 | 3 | 4 | 3  |
| 0  | 0 | 1 | 0 | 4 | 4 | 4  |
| 0  | 1 | 0 | 0 | 3 | 4 | 3  |
| 0  | 0 | 1 | 0 | 2 | 2 | 0  |
| 1  | 1 | 1 | 1 | 4 | 3 | 3  |
| 4  | 4 | 4 | 0 | 4 | 4 | 4  |
| 0  | 0 | 0 | 0 | 4 | 4 | 3  |
| 99 | 0 | 0 | 0 | 4 | 4 | 99 |
| 0  | 0 | 0 | 0 | 4 | 4 | 99 |
| 0  | 1 | 0 | 0 | 4 | 4 | 4  |
| 0  | 1 | 0 | 0 | 4 | 4 | 3  |
| 1  | 1 | 1 | 0 | 4 | 4 | 4  |
| 4  | 1 | 0 | 0 | 4 | 4 | 99 |
| 0  | 2 | 1 | 2 | 3 | 3 | 4  |
| 0  | 0 | 0 | 0 | 4 | 2 | 4  |
| 0  | 0 | 0 | 0 | 4 | 4 | 4  |
| 0  | 0 | 0 | 0 | 4 | 4 | 3  |
| 2  | 1 | 1 | 0 | 3 | 3 | 3  |
| 3  | 0 | 2 | 0 | 3 | 4 | 1  |
| 0  | 0 | 0 | 0 | 0 | 0 | 0  |
| 0  | 0 | 0 | 0 | 4 | 4 | 4  |
| 0  | 0 | 0 | 0 | 4 | 4 | 4  |
| 1  | 0 | 0 | 0 | 4 | 4 | 4  |
| 0  | 0 | 0 | 0 | 4 | 4 | 4  |
| 0  | 0 | 0 | 0 | 4 | 4 | 4  |
| 0  | 0 | 0 | 0 | 4 | 4 | 4  |
| 0  | 0 | 0 | 0 | 4 | 4 | 4  |
| 0  | 0 | 0 | 0 | 4 | 4 | 4  |
| 0  | 0 | 1 | 0 | 4 | 4 | 4  |
| 0  | 0 | 0 | 0 | 4 | 4 | 4  |
| 0  | 1 | 0 | 0 | 4 | 3 | 4  |
| 0  | 0 | 0 | 0 | 4 | 4 | 3  |
| 0  | 0 | 0 | 0 | 3 | 1 | 0  |
| 0  | 0 | 0 | 0 | 4 | 4 | 4  |
| 99 | 0 | 0 | 0 | 3 | 2 | 3  |
| 0  | 0 | 0 | 0 | 4 | 4 | 4  |
| 0  | 0 | 0 | 0 | 4 | 4 | 4  |
| 0  | 0 | 0 | 0 | 4 | 4 | 4  |
| 2  | 1 | 0 | 0 | 4 | 4 | 4  |
| 0  | 1 | 0 | 0 | 4 | 4 | 4  |
| 3  | 3 | 1 | 0 | 2 | 3 | 2  |
| 0  | 0 | 0 | 0 | 4 | 4 | 4  |
| 0  | 0 | 0 | 0 | 4 | 4 | 3  |
| 0  | 0 | 0 | 0 | 3 | 4 | 3  |



|    |    |    |    |   |   |   |
|----|----|----|----|---|---|---|
| 0  | 0  | 0  | 0  | 4 | 4 | 4 |
| 0  | 0  | 0  | 0  | 4 | 4 | 4 |
| 99 | 99 | 99 | 99 | 4 | 4 | 4 |
| 0  | 0  | 0  | 0  | 4 | 4 | 4 |
| 0  | 1  | 1  | 0  | 4 | 4 | 4 |
| 0  | 1  | 0  | 0  | 3 | 4 | 4 |
| 0  | 0  | 0  | 0  | 4 | 4 | 4 |
| 0  | 1  | 1  | 1  | 4 | 4 | 4 |
| 0  | 0  | 0  | 0  | 4 | 4 | 3 |
| 0  | 0  | 0  | 0  | 4 | 4 | 4 |
| 2  | 0  | 0  | 0  | 1 | 3 | 1 |
| 0  | 0  | 3  | 0  | 2 | 3 | 1 |
| 0  | 0  | 0  | 0  | 2 | 2 | 0 |
| 0  | 0  | 0  | 0  | 4 | 4 | 4 |
| 0  | 0  | 0  | 0  | 4 | 4 | 4 |
| 0  | 0  | 0  | 0  | 4 | 4 | 4 |
| 0  | 0  | 0  | 0  | 4 | 4 | 4 |
| 0  | 1  | 1  | 0  | 4 | 4 | 4 |
| 1  | 0  | 0  | 0  | 2 | 4 | 1 |
| 1  | 0  | 0  | 0  | 4 | 4 | 4 |
| 1  | 1  | 0  | 0  | 4 | 4 | 4 |
| 0  | 2  | 0  | 0  | 4 | 4 | 4 |
| 0  | 0  | 0  | 0  | 4 | 4 | 4 |
| 0  | 0  | 0  | 0  | 4 | 4 | 4 |
| 1  | 1  | 1  | 1  | 1 | 4 | 1 |
| 0  | 0  | 0  | 0  | 0 | 0 | 0 |
| 0  | 0  | 0  | 0  | 4 | 4 | 4 |
| 1  | 2  | 0  | 2  | 4 | 4 | 4 |
| 0  | 0  | 0  | 0  | 4 | 4 | 4 |
| 0  | 0  | 0  | 0  | 4 | 4 | 4 |
| 0  | 0  | 0  | 0  | 4 | 4 | 4 |
| 1  | 1  | 0  | 1  | 3 | 4 | 4 |
| 0  | 0  | 0  | 0  | 2 | 2 | 0 |
| 0  | 0  | 0  | 0  | 3 | 3 | 3 |
| 0  | 0  | 0  | 0  | 4 | 4 | 4 |
| 1  | 0  | 0  | 0  | 4 | 4 | 4 |
| 4  | 4  | 2  | 0  | 2 | 3 | 1 |
| 0  | 0  | 0  | 0  | 4 | 4 | 4 |
| 0  | 0  | 0  | 0  | 3 | 4 | 3 |
| 0  | 2  | 0  | 0  | 4 | 4 | 4 |
| 1  | 0  | 2  | 0  | 4 | 4 | 4 |
| 1  | 2  | 2  | 0  | 4 | 4 | 4 |
| 0  | 0  | 0  | 0  | 3 | 3 | 3 |
| 1  | 3  | 2  | 0  | 2 | 4 | 2 |
| 0  | 0  | 0  | 0  | 2 | 2 | 2 |
| 0  | 0  | 0  | 0  | 4 | 4 | 4 |
| 0  | 0  | 0  | 0  | 4 | 4 | 4 |
| 1  | 1  | 1  | 1  | 4 | 3 | 3 |
| 1  | 2  | 0  | 0  | 3 | 3 | 2 |

|   |   |   |   |   |   |   |
|---|---|---|---|---|---|---|
| 0 | 0 | 0 | 0 | 4 | 4 | 4 |
| 0 | 0 | 0 | 0 | 4 | 4 | 4 |
| 0 | 0 | 0 | 0 | 4 | 4 | 4 |
| 1 | 3 | 0 | 0 | 4 | 4 | 4 |
| 0 | 0 | 0 | 0 | 0 | 0 | 0 |
| 1 | 1 | 1 | 1 | 1 | 4 | 3 |
| 1 | 2 | 0 | 0 | 4 | 4 | 4 |
| 0 | 0 | 0 | 0 | 4 | 4 | 4 |
| 1 | 1 | 0 | 0 | 4 | 4 | 4 |
| 1 | 1 | 2 | 0 | 4 | 4 | 3 |
| 0 | 1 | 0 | 0 | 4 | 4 | 4 |
| 0 | 0 | 0 | 0 | 4 | 3 | 3 |
| 0 | 0 | 0 | 0 | 4 | 4 | 3 |
| 0 | 0 | 0 | 0 | 4 | 4 | 4 |
| 0 | 0 | 0 | 0 | 4 | 4 | 4 |
| 1 | 2 | 0 | 0 | 4 | 4 | 4 |
| 0 | 4 | 3 | 0 | 2 | 4 | 3 |
| 2 | 0 | 0 | 0 | 4 | 4 | 4 |
| 0 | 3 | 1 | 0 | 4 | 4 | 4 |
| 2 | 4 | 0 | 0 | 3 | 4 | 2 |
| 0 | 0 | 0 | 0 | 4 | 4 | 4 |
| 0 | 0 | 0 | 0 | 4 | 4 | 4 |
| 0 | 0 | 0 | 0 | 4 | 4 | 4 |
| 0 | 0 | 0 | 0 | 4 | 3 | 3 |
| 0 | 0 | 0 | 0 | 4 | 4 | 4 |
| 0 | 0 | 0 | 0 | 4 | 4 | 4 |
| 0 | 2 | 0 | 0 | 4 | 4 | 4 |
| 0 | 4 | 3 | 0 | 4 | 4 | 4 |
| 0 | 0 | 0 | 0 | 2 | 4 | 0 |
| 1 | 3 | 2 | 0 | 4 | 4 | 4 |
| 0 | 0 | 0 | 0 | 4 | 4 | 3 |
| 0 | 0 | 0 | 0 | 4 | 4 | 3 |
| 0 | 1 | 1 | 0 | 4 | 4 | 4 |
| 1 | 2 | 0 | 0 | 0 | 0 | 0 |
| 1 | 0 | 0 | 0 | 4 | 4 | 4 |
| 0 | 1 | 0 | 0 | 2 | 4 | 4 |
| 0 | 1 | 0 | 0 | 4 | 4 | 4 |
| 0 | 0 | 0 | 0 | 4 | 4 | 4 |
| 0 | 0 | 0 | 0 | 4 | 4 | 4 |
| 0 | 0 | 0 | 0 | 3 | 4 | 3 |
| 0 | 0 | 0 | 0 | 4 | 4 | 3 |
| 0 | 4 | 0 | 0 | 4 | 4 | 4 |
| 0 | 0 | 0 | 0 | 4 | 4 | 4 |
| 0 | 0 | 0 | 0 | 4 | 4 | 4 |
| 0 | 0 | 0 | 0 | 3 | 4 | 3 |
| 2 | 0 | 0 | 0 | 4 | 4 | 4 |
| 0 | 2 | 0 | 0 | 4 | 4 | 4 |
| 2 | 0 | 0 | 1 | 4 | 4 | 4 |
| 1 | 0 | 0 | 0 | 4 | 4 | 4 |
| 2 | 0 | 0 | 0 | 1 | 2 | 3 |

|    |   |   |   |    |    |    |
|----|---|---|---|----|----|----|
| 0  | 4 | 3 | 0 | 4  | 2  | 4  |
| 0  | 0 | 0 | 0 | 4  | 4  | 4  |
| 1  | 0 | 1 | 1 | 4  | 3  | 3  |
| 3  | 2 | 1 | 0 | 4  | 4  | 99 |
| 0  | 0 | 0 | 0 | 3  | 3  | 99 |
| 0  | 0 | 0 | 0 | 4  | 4  | 4  |
| 0  | 1 | 0 | 0 | 4  | 3  | 4  |
| 0  | 0 | 0 | 0 | 4  | 4  | 4  |
| 0  | 0 | 0 | 0 | 4  | 4  | 4  |
| 99 | 0 | 0 | 0 | 4  | 4  | 4  |
| 0  | 0 | 2 | 0 | 2  | 3  | 1  |
| 0  | 0 | 0 | 0 | 4  | 4  | 4  |
| 0  | 0 | 1 | 0 | 4  | 4  | 3  |
| 0  | 0 | 0 | 0 | 3  | 4  | 3  |
| 0  | 0 | 0 | 0 | 2  | 4  | 4  |
| 0  | 1 | 0 | 0 | 4  | 4  | 4  |
| 0  | 1 | 0 | 0 | 4  | 4  | 4  |
| 0  | 1 | 1 | 0 | 4  | 4  | 4  |
| 2  | 2 | 3 | 0 | 3  | 4  | 3  |
| 0  | 1 | 0 | 0 | 4  | 4  | 4  |
| 4  | 2 | 1 | 4 | 1  | 2  | 0  |
| 0  | 2 | 0 | 0 | 2  | 2  | 2  |
| 0  | 0 | 0 | 0 | 4  | 4  | 4  |
| 2  | 1 | 0 | 0 | 3  | 4  | 4  |
| 1  | 0 | 0 | 0 | 1  | 1  | 1  |
| 0  | 0 | 0 | 0 | 99 | 99 | 99 |
| 0  | 4 | 3 | 0 | 4  | 4  | 4  |
| 0  | 1 | 0 | 0 | 4  | 4  | 99 |
| 0  | 1 | 2 | 0 | 4  | 3  | 3  |
| 1  | 0 | 0 | 0 | 4  | 4  | 4  |
| 0  | 1 | 1 | 0 | 4  | 4  | 4  |
| 0  | 0 | 0 | 0 | 4  | 4  | 4  |
| 1  | 2 | 2 | 0 | 2  | 2  | 2  |
| 0  | 0 | 1 | 0 | 4  | 4  | 4  |
| 0  | 0 | 0 | 0 | 4  | 4  | 3  |
| 0  | 0 | 0 | 0 | 4  | 4  | 4  |
| 0  | 2 | 0 | 2 | 4  | 4  | 4  |
| 2  | 1 | 1 | 0 | 4  | 4  | 4  |
| 0  | 0 | 0 | 0 | 3  | 4  | 4  |
| 1  | 0 | 0 | 0 | 4  | 4  | 4  |
| 1  | 1 | 1 | 1 | 3  | 4  | 2  |
| 0  | 0 | 0 | 0 | 4  | 4  | 3  |
| 0  | 1 | 0 | 0 | 4  | 4  | 4  |
| 0  | 1 | 0 | 0 | 3  | 2  | 2  |
| 0  | 0 | 0 | 0 | 1  | 3  | 2  |
| 0  | 0 | 0 | 0 | 3  | 3  | 2  |
| 0  | 1 | 1 | 0 | 4  | 4  | 4  |
| 0  | 0 | 0 | 0 | 4  | 3  | 99 |

|   |    |   |   |   |   |    |
|---|----|---|---|---|---|----|
| 0 | 0  | 0 | 0 | 4 | 4 | 4  |
| 0 | 1  | 0 | 0 | 3 | 3 | 3  |
| 0 | 0  | 0 | 0 | 4 | 4 | 4  |
| 0 | 0  | 0 | 0 | 2 | 3 | 2  |
| 0 | 0  | 0 | 0 | 4 | 4 | 3  |
| 0 | 0  | 0 | 0 | 4 | 4 | 4  |
| 0 | 0  | 0 | 0 | 3 | 3 | 2  |
| 0 | 0  | 0 | 0 | 0 | 2 | 2  |
| 2 | 1  | 1 | 0 | 4 | 4 | 4  |
| 0 | 0  | 0 | 0 | 3 | 2 | 3  |
| 1 | 0  | 0 | 0 | 4 | 4 | 4  |
| 0 | 2  | 0 | 0 | 4 | 4 | 4  |
| 0 | 0  | 0 | 0 | 4 | 4 | 4  |
| 0 | 0  | 0 | 0 | 4 | 4 | 4  |
| 0 | 0  | 0 | 0 | 4 | 4 | 4  |
| 0 | 0  | 0 | 0 | 3 | 3 | 4  |
| 1 | 0  | 0 | 0 | 3 | 4 | 3  |
| 0 | 0  | 0 | 0 | 0 | 4 | 0  |
| 0 | 1  | 0 | 0 | 4 | 4 | 4  |
| 0 | 4  | 0 | 0 | 4 | 4 | 4  |
| 4 | 4  | 1 | 1 | 4 | 4 | 3  |
| 1 | 1  | 0 | 0 | 1 | 3 | 2  |
| 1 | 0  | 0 | 0 | 3 | 4 | 2  |
| 0 | 4  | 0 | 0 | 4 | 4 | 4  |
| 4 | 4  | 4 | 0 | 4 | 4 | 4  |
| 0 | 0  | 1 | 0 | 3 | 4 | 3  |
| 1 | 2  | 0 | 1 | 4 | 4 | 4  |
| 0 | 0  | 0 | 0 | 3 | 4 | 3  |
| 2 | 2  | 3 | 1 | 4 | 2 | 3  |
| 0 | 0  | 0 | 0 | 1 | 1 | 0  |
| 0 | 0  | 0 | 0 | 4 | 4 | 3  |
| 1 | 4  | 1 | 0 | 0 | 4 | 4  |
| 0 | 0  | 0 | 0 | 4 | 4 | 4  |
| 0 | 0  | 0 | 0 | 4 | 4 | 4  |
| 0 | 0  | 0 | 0 | 4 | 4 | 4  |
| 0 | 0  | 0 | 0 | 4 | 4 | 4  |
| 0 | 99 | 1 | 0 | 4 | 4 | 3  |
| 0 | 2  | 1 | 0 | 3 | 3 | 2  |
| 0 | 0  | 0 | 0 | 4 | 4 | 2  |
| 0 | 0  | 0 | 0 | 4 | 4 | 4  |
| 0 | 4  | 0 | 0 | 4 | 4 | 4  |
| 1 | 2  | 2 | 0 | 3 | 3 | 1  |
| 0 | 0  | 0 | 0 | 4 | 4 | 4  |
| 1 | 0  | 0 | 0 | 0 | 1 | 0  |
| 0 | 0  | 0 | 0 | 4 | 4 | 4  |
| 0 | 2  | 1 | 0 | 4 | 4 | 2  |
| 1 | 0  | 0 | 0 | 2 | 1 | 2  |
| 0 | 0  | 0 | 0 | 4 | 4 | 99 |
| 0 | 0  | 1 | 1 | 3 | 3 | 3  |
| 0 | 3  | 0 | 0 | 4 | 4 | 0  |

|    |    |    |    |    |    |    |
|----|----|----|----|----|----|----|
| 0  | 1  | 1  | 2  | 2  | 2  | 2  |
| 1  | 0  | 0  | 0  | 2  | 2  | 1  |
| 0  | 1  | 0  | 0  | 4  | 4  | 4  |
| 99 | 99 | 99 | 99 | 99 | 99 | 99 |
| 0  | 0  | 0  | 0  | 4  | 4  | 4  |
| 0  | 0  | 1  | 0  | 0  | 4  | 0  |
| 0  | 1  | 1  | 0  | 4  | 3  | 3  |
| 0  | 2  | 1  | 0  | 2  | 3  | 3  |
| 0  | 0  | 0  | 0  | 2  | 3  | 4  |
| 4  | 2  | 2  | 2  | 4  | 2  | 2  |
| 0  | 0  | 0  | 0  | 99 | 99 | 99 |
| 0  | 1  | 0  | 0  | 4  | 4  | 4  |
| 99 | 99 | 99 | 99 | 1  | 3  | 99 |
| 0  | 99 | 0  | 0  | 4  | 4  | 4  |
| 0  | 4  | 2  | 0  | 3  | 3  | 3  |
| 0  | 0  | 0  | 0  | 4  | 4  | 4  |
| 0  | 0  | 0  | 0  | 4  | 4  | 4  |
| 0  | 0  | 0  | 0  | 4  | 4  | 4  |
| 0  | 3  | 4  | 0  | 3  | 2  | 2  |
| 0  | 1  | 0  | 0  | 2  | 3  | 2  |
| 0  | 0  | 0  | 0  | 4  | 4  | 4  |
| 0  | 0  | 0  | 0  | 4  | 4  | 4  |
| 2  | 0  | 0  | 0  | 4  | 4  | 3  |
| 0  | 2  | 2  | 0  | 2  | 0  | 2  |
| 0  | 2  | 1  | 1  | 2  | 4  | 2  |
| 0  | 0  | 0  | 0  | 2  | 3  | 2  |
| 0  | 0  | 0  | 0  | 4  | 4  | 2  |
| 2  | 0  | 2  | 0  | 2  | 4  | 3  |
| 0  | 0  | 0  | 0  | 4  | 4  | 4  |
| 0  | 4  | 1  | 0  | 2  | 2  | 1  |
| 0  | 0  | 0  | 0  | 4  | 4  | 99 |
| 0  | 0  | 0  | 0  | 3  | 4  | 4  |
| 0  | 0  | 0  | 0  | 4  | 4  | 4  |
| 0  | 1  | 1  | 0  | 4  | 4  | 4  |
| 0  | 0  | 0  | 0  | 4  | 4  | 4  |
| 0  | 0  | 0  | 0  | 2  | 4  | 2  |
| 0  | 2  | 0  | 0  | 1  | 1  | 1  |
| 0  | 0  | 0  | 0  | 4  | 4  | 4  |
| 99 | 1  | 4  | 0  | 3  | 2  | 99 |
| 0  | 2  | 0  | 0  | 3  | 3  | 2  |
| 0  | 0  | 0  | 0  | 4  | 4  | 3  |
| 0  | 1  | 0  | 0  | 3  | 4  | 2  |
| 0  | 0  | 0  | 0  | 4  | 4  | 4  |
| 0  | 0  | 0  | 0  | 4  | 4  | 4  |
| 0  | 0  | 0  | 0  | 4  | 4  | 4  |
| 1  | 1  | 0  | 0  | 3  | 3  | 3  |
| 2  | 1  | 2  | 2  | 2  | 3  | 1  |
| 0  | 0  | 0  | 0  | 4  | 4  | 3  |
| 0  | 2  | 2  | 0  | 4  | 4  | 4  |

|    |    |    |    |    |    |    |
|----|----|----|----|----|----|----|
| 99 | 99 | 99 | 99 | 99 | 99 | 99 |
| 0  | 0  | 0  | 0  | 0  | 0  | 0  |
| 0  | 0  | 0  | 0  | 3  | 4  | 3  |
| 1  | 0  | 0  | 0  | 4  | 4  | 4  |
| 2  | 0  | 0  | 0  | 4  | 4  | 4  |
| 0  | 0  | 0  | 0  | 4  | 3  | 4  |
| 0  | 0  | 0  | 0  | 4  | 4  | 4  |
| 0  | 0  | 0  | 0  | 4  | 3  | 3  |
| 0  | 0  | 0  | 0  | 4  | 4  | 4  |
| 0  | 0  | 0  | 0  | 4  | 4  | 3  |
| 0  | 1  | 0  | 0  | 3  | 4  | 3  |
| 0  | 0  | 0  | 0  | 4  | 4  | 4  |
| 0  | 2  | 0  | 0  | 2  | 2  | 2  |
| 0  | 2  | 3  | 0  | 4  | 4  | 4  |
| 99 | 1  | 1  | 2  | 3  | 4  | 0  |
| 0  | 2  | 0  | 0  | 2  | 3  | 4  |
| 99 | 99 | 99 | 99 | 99 | 99 | 99 |
| 0  | 0  | 0  | 0  | 4  | 3  | 4  |
| 0  | 0  | 0  | 0  | 4  | 4  | 3  |
| 0  | 1  | 1  | 0  | 4  | 4  | 4  |
| 0  | 0  | 0  | 0  | 4  | 4  | 4  |
| 0  | 1  | 0  | 0  | 4  | 4  | 4  |
| 3  | 4  | 1  | 4  | 4  | 3  | 4  |
| 0  | 0  | 0  | 0  | 4  | 4  | 4  |
| 0  | 0  | 0  | 0  | 4  | 4  | 4  |
| 0  | 0  | 0  | 0  | 4  | 3  | 3  |
| 99 | 99 | 99 | 99 | 99 | 4  | 3  |
| 0  | 0  | 0  | 0  | 4  | 4  | 4  |
| 0  | 1  | 0  | 0  | 4  | 4  | 4  |
| 0  | 0  | 0  | 0  | 0  | 0  | 0  |
| 0  | 0  | 0  | 0  | 4  | 4  | 4  |
| 0  | 1  | 0  | 0  | 4  | 4  | 4  |
| 0  | 0  | 0  | 0  | 2  | 4  | 0  |
| 0  | 2  | 0  | 0  | 4  | 4  | 4  |
| 1  | 4  | 0  | 0  | 2  | 4  | 3  |
| 1  | 0  | 3  | 0  | 3  | 4  | 3  |
| 0  | 0  | 0  | 0  | 3  | 3  | 3  |
| 0  | 0  | 0  | 0  | 4  | 4  | 4  |
| 0  | 0  | 0  | 0  | 4  | 4  | 4  |
| 0  | 0  | 0  | 0  | 4  | 4  | 4  |
| 3  | 2  | 2  | 2  | 4  | 4  | 3  |
| 0  | 1  | 0  | 1  | 4  | 4  | 4  |
| 0  | 0  | 0  | 0  | 99 | 4  | 99 |
| 0  | 0  | 0  | 0  | 3  | 4  | 2  |
| 0  | 0  | 0  | 0  | 1  | 4  | 0  |
| 0  | 0  | 0  | 0  | 3  | 3  | 3  |
| 0  | 0  | 0  | 0  | 4  | 4  | 4  |
| 0  | 2  | 0  | 0  | 2  | 2  | 1  |

|    |    |    |    |    |    |    |
|----|----|----|----|----|----|----|
| 4  | 0  | 0  | 0  | 4  | 4  | 4  |
| 0  | 1  | 0  | 0  | 4  | 4  | 3  |
| 0  | 0  | 0  | 0  | 4  | 4  | 3  |
| 0  | 0  | 0  | 0  | 4  | 4  | 4  |
| 0  | 2  | 2  | 1  | 4  | 4  | 4  |
| 0  | 0  | 0  | 1  | 4  | 4  | 3  |
| 0  | 0  | 0  | 0  | 4  | 4  | 4  |
| 0  | 0  | 0  | 0  | 2  | 4  | 1  |
| 0  | 0  | 0  | 0  | 1  | 99 | 0  |
| 0  | 99 | 99 | 0  | 4  | 4  | 3  |
| 0  | 0  | 0  | 0  | 4  | 4  | 4  |
| 0  | 0  | 0  | 0  | 4  | 4  | 4  |
| 3  | 3  | 0  | 4  | 0  | 1  | 1  |
| 0  | 0  | 0  | 0  | 4  | 4  | 4  |
| 0  | 0  | 0  | 0  | 4  | 4  | 3  |
| 0  | 0  | 0  | 0  | 4  | 4  | 4  |
| 0  | 0  | 2  | 0  | 4  | 4  | 3  |
| 4  | 4  | 1  | 4  | 4  | 4  | 0  |
| 0  | 0  | 0  | 0  | 0  | 1  | 0  |
| 0  | 0  | 0  | 0  | 4  | 4  | 4  |
| 0  | 0  | 0  | 0  | 4  | 4  | 3  |
| 0  | 0  | 0  | 0  | 4  | 4  | 4  |
| 0  | 0  | 0  | 0  | 4  | 4  | 4  |
| 99 | 99 | 99 | 99 | 99 | 99 | 99 |
| 0  | 0  | 0  | 0  | 3  | 3  | 3  |
| 0  | 1  | 0  | 0  | 1  | 2  | 2  |
| 1  | 1  | 0  | 0  | 4  | 2  | 3  |
| 0  | 1  | 1  | 0  | 4  | 4  | 4  |
| 0  | 0  | 0  | 0  | 4  | 4  | 4  |
| 0  | 0  | 0  | 0  | 3  | 4  | 3  |
| 1  | 99 | 0  | 0  | 1  | 3  | 99 |
| 99 | 99 | 99 | 99 | 99 | 99 | 99 |
| 0  | 0  | 0  | 0  | 2  | 2  | 3  |
| 0  | 1  | 0  | 0  | 4  | 4  | 4  |
| 0  | 0  | 0  | 0  | 4  | 4  | 4  |
| 2  | 4  | 1  | 0  | 4  | 4  | 4  |
| 0  | 0  | 0  | 0  | 4  | 4  | 4  |
| 0  | 0  | 0  | 0  | 4  | 4  | 4  |
| 0  | 0  | 0  | 0  | 4  | 4  | 3  |
| 0  | 0  | 0  | 0  | 4  | 3  | 3  |
| 0  | 0  | 0  | 0  | 4  | 4  | 4  |
| 1  | 2  | 1  | 0  | 1  | 2  | 0  |
| 0  | 0  | 0  | 0  | 4  | 4  | 4  |
| 1  | 4  | 3  | 0  | 4  | 4  | 4  |
| 0  | 0  | 0  | 0  | 4  | 4  | 4  |
| 1  | 1  | 0  | 0  | 4  | 4  | 3  |
| 0  | 3  | 0  | 0  | 2  | 2  | 2  |
| 0  | 1  | 2  | 0  | 4  | 4  | 4  |

|   |   |   |   |   |   |    |
|---|---|---|---|---|---|----|
| 0 | 0 | 0 | 0 | 3 | 2 | 1  |
| 0 | 1 | 0 | 0 | 3 | 4 | 3  |
| 0 | 0 | 0 | 0 | 4 | 4 | 4  |
| 2 | 0 | 0 | 0 | 3 | 4 | 3  |
| 0 | 0 | 0 | 0 | 4 | 4 | 4  |
| 0 | 0 | 0 | 0 | 1 | 1 | 2  |
| 0 | 0 | 0 | 0 | 4 | 4 | 4  |
| 4 | 4 | 0 | 0 | 4 | 4 | 4  |
| 2 | 2 | 2 | 0 | 3 | 4 | 3  |
| 2 | 2 | 2 | 0 | 3 | 4 | 3  |
| 0 | 1 | 0 | 0 | 2 | 3 | 2  |
| 0 | 0 | 0 | 0 | 2 | 4 | 3  |
| 0 | 0 | 0 | 0 | 2 | 4 | 2  |
| 1 | 4 | 1 | 2 | 2 | 1 | 1  |
| 0 | 1 | 1 | 0 | 4 | 4 | 99 |
| 1 | 0 | 0 | 0 | 3 | 4 | 3  |
| 4 | 2 | 2 | 0 | 3 | 3 | 2  |
| 3 | 2 | 2 | 2 | 3 | 4 | 2  |
| 0 | 4 | 2 | 0 | 4 | 4 | 3  |
| 1 | 2 | 1 | 3 | 3 | 4 | 3  |
| 0 | 0 | 0 | 0 | 3 | 3 | 3  |
| 0 | 2 | 0 | 0 | 4 | 4 | 4  |
| 0 | 0 | 0 | 0 | 2 | 2 | 2  |
| 0 | 0 | 0 | 0 | 3 | 3 | 3  |
| 0 | 1 | 0 | 0 | 2 | 4 | 3  |
| 0 | 0 | 0 | 0 | 2 | 4 | 3  |
| 0 | 0 | 0 | 0 | 1 | 1 | 1  |
| 0 | 1 | 0 | 0 | 3 | 3 | 3  |
| 2 | 3 | 0 | 0 | 4 | 4 | 4  |
| 0 | 0 | 0 | 0 | 3 | 4 | 4  |
| 2 | 1 | 1 | 0 | 4 | 4 | 4  |
| 0 | 4 | 0 | 0 | 3 | 2 | 3  |
| 0 | 0 | 0 | 0 | 4 | 4 | 3  |
| 0 | 1 | 1 | 0 | 0 | 1 | 2  |
| 0 | 0 | 0 | 0 | 4 | 4 | 4  |
| 0 | 0 | 0 | 0 | 3 | 3 | 3  |
| 0 | 0 | 0 | 0 | 3 | 3 | 2  |
| 0 | 0 | 0 | 0 | 4 | 4 | 4  |
| 0 | 0 | 0 | 0 | 4 | 4 | 4  |
| 0 | 0 | 0 | 0 | 4 | 4 | 4  |
| 0 | 0 | 0 | 0 | 0 | 2 | 0  |
| 1 | 2 | 0 | 0 | 2 | 2 | 1  |
| 0 | 0 | 0 | 0 | 4 | 4 | 0  |
| 0 | 0 | 0 | 0 | 4 | 4 | 4  |
| 0 | 0 | 0 | 0 | 2 | 2 | 0  |
| 0 | 1 | 0 | 0 | 0 | 3 | 2  |
| 0 | 0 | 0 | 0 | 4 | 4 | 4  |
| 0 | 0 | 0 | 0 | 4 | 4 | 4  |
| 0 | 0 | 0 | 0 | 4 | 4 | 4  |



|    |    |    |    |    |    |    |
|----|----|----|----|----|----|----|
| 0  | 0  | 0  | 0  | 3  | 4  | 99 |
| 1  | 2  | 0  | 0  | 4  | 2  | 4  |
| 99 | 1  | 0  | 0  | 4  | 4  | 4  |
| 0  | 0  | 0  | 0  | 4  | 4  | 4  |
| 0  | 1  | 0  | 0  | 2  | 3  | 1  |
| 99 | 1  | 0  | 0  | 4  | 4  | 2  |
| 0  | 0  | 0  | 0  | 2  | 4  | 0  |
| 0  | 1  | 0  | 0  | 4  | 4  | 3  |
| 0  | 0  | 0  | 0  | 4  | 4  | 2  |
| 0  | 0  | 1  | 0  | 4  | 4  | 3  |
| 2  | 2  | 1  | 0  | 3  | 4  | 2  |
| 1  | 2  | 0  | 0  | 4  | 4  | 4  |
| 3  | 4  | 3  | 3  | 4  | 4  | 4  |
| 0  | 0  | 0  | 0  | 3  | 4  | 4  |
| 0  | 1  | 0  | 0  | 3  | 2  | 2  |
| 0  | 0  | 0  | 0  | 4  | 4  | 4  |
| 2  | 4  | 0  | 2  | 3  | 4  | 2  |
| 1  | 4  | 4  | 0  | 4  | 3  | 4  |
| 0  | 4  | 0  | 4  | 4  | 4  | 4  |
| 99 | 99 | 99 | 99 | 99 | 99 | 99 |
| 0  | 0  | 1  | 0  | 4  | 3  | 3  |
| 0  | 1  | 0  | 0  | 4  | 4  | 3  |
| 1  | 1  | 2  | 0  | 1  | 4  | 3  |
| 3  | 2  | 0  | 0  | 4  | 4  | 3  |
| 0  | 0  | 0  | 0  | 4  | 4  | 3  |
| 1  | 2  | 0  | 0  | 4  | 4  | 4  |
| 0  | 0  | 0  | 0  | 4  | 3  | 4  |
| 0  | 2  | 1  | 0  | 4  | 4  | 4  |
| 0  | 0  | 0  | 0  | 4  | 4  | 4  |
| 0  | 4  | 2  | 0  | 4  | 4  | 4  |
| 1  | 2  | 0  | 0  | 2  | 3  | 4  |
| 0  | 0  | 0  | 0  | 4  | 3  | 4  |
| 2  | 0  | 1  | 0  | 4  | 4  | 4  |
| 0  | 1  | 1  | 0  | 4  | 4  | 4  |
| 0  | 0  | 0  | 0  | 4  | 4  | 4  |
| 0  | 2  | 2  | 0  | 4  | 4  | 3  |
| 1  | 99 | 0  | 0  | 4  | 4  | 4  |
| 0  | 2  | 1  | 0  | 4  | 4  | 4  |
| 1  | 0  | 0  | 0  | 4  | 3  | 3  |
| 0  | 1  | 1  | 0  | 4  | 3  | 2  |
| 0  | 0  | 0  | 0  | 4  | 4  | 4  |
| 0  | 0  | 0  | 0  | 4  | 4  | 99 |
| 0  | 1  | 0  | 0  | 4  | 4  | 4  |
| 0  | 0  | 0  | 0  | 4  | 4  | 4  |
| 0  | 1  | 0  | 0  | 4  | 4  | 4  |
| 0  | 4  | 2  | 0  | 4  | 4  | 4  |
| 2  | 1  | 0  | 0  | 2  | 3  | 2  |
| 1  | 4  | 3  | 1  | 1  | 2  | 1  |

|   |   |   |   |   |   |   |
|---|---|---|---|---|---|---|
| 0 | 2 | 0 | 0 | 4 | 4 | 4 |
| 0 | 0 | 0 | 0 | 4 | 4 | 4 |
| 0 | 1 | 0 | 0 | 0 | 2 | 1 |
| 0 | 0 | 0 | 0 | 4 | 4 | 3 |
| 1 | 0 | 1 | 0 | 4 | 3 | 2 |
| 2 | 0 | 0 | 0 | 3 | 4 | 4 |
| 1 | 1 | 1 | 2 | 3 | 2 | 3 |
| 1 | 2 | 3 | 1 | 4 | 4 | 0 |
| 0 | 0 | 0 | 0 | 4 | 4 | 4 |
| 0 | 2 | 0 | 0 | 3 | 4 | 4 |
| 3 | 1 | 0 | 0 | 4 | 1 | 1 |
| 1 | 2 | 0 | 0 | 0 | 2 | 0 |
| 0 | 3 | 0 | 0 | 4 | 4 | 0 |
| 1 | 2 | 4 | 2 | 4 | 4 | 3 |
| 0 | 0 | 0 | 0 | 4 | 4 | 4 |
| 1 | 2 | 2 | 0 | 4 | 4 | 3 |
| 0 | 0 | 0 | 0 | 4 | 4 | 4 |
| 1 | 1 | 1 | 0 | 4 | 4 | 3 |
| 0 | 1 | 0 | 0 | 4 | 4 | 4 |
| 0 | 0 | 0 | 0 | 3 | 4 | 3 |
| 0 | 0 | 0 | 0 | 4 | 4 | 4 |
| 0 | 0 | 0 | 0 | 4 | 4 | 4 |
| 1 | 1 | 1 | 0 | 4 | 4 | 4 |
| 0 | 0 | 1 | 0 | 3 | 4 | 3 |
| 0 | 1 | 0 | 0 | 4 | 3 | 3 |
| 0 | 0 | 0 | 0 | 0 | 0 | 0 |
| 0 | 0 | 0 | 0 | 3 | 4 | 3 |
| 0 | 0 | 0 | 0 | 0 | 4 | 0 |
| 0 | 0 | 0 | 0 | 2 | 2 | 2 |
| 0 | 0 | 0 | 0 | 4 | 3 | 4 |
| 0 | 0 | 0 | 0 | 4 | 4 | 4 |
| 0 | 0 | 0 | 0 | 3 | 4 | 4 |
| 1 | 1 | 0 | 0 | 2 | 2 | 2 |
| 0 | 0 | 0 | 0 | 4 | 4 | 4 |
| 0 | 1 | 2 | 0 | 3 | 4 | 4 |
| 0 | 4 | 0 | 0 | 4 | 4 | 0 |
| 1 | 0 | 0 | 0 | 4 | 4 | 4 |
| 0 | 2 | 2 | 0 | 4 | 4 | 4 |
| 0 | 3 | 0 | 0 | 2 | 2 | 2 |
| 2 | 0 | 0 | 0 | 3 | 3 | 3 |
| 0 | 4 | 4 | 0 | 4 | 4 | 4 |
| 4 | 4 | 4 | 4 | 4 | 4 | 4 |
| 1 | 0 | 0 | 0 | 4 | 4 | 4 |
| 0 | 1 | 0 | 0 | 2 | 4 | 2 |
| 0 | 0 | 0 | 0 | 2 | 3 | 1 |
| 0 | 1 | 0 | 0 | 2 | 3 | 2 |
| 0 | 2 | 0 | 0 | 2 | 2 | 2 |
| 0 | 0 | 0 | 0 | 4 | 4 | 3 |

|    |    |   |   |    |    |    |
|----|----|---|---|----|----|----|
| 2  | 0  | 0 | 0 | 4  | 4  | 4  |
| 0  | 0  | 0 | 0 | 4  | 4  | 4  |
| 0  | 0  | 0 | 0 | 4  | 4  | 4  |
| 0  | 0  | 0 | 0 | 4  | 4  | 4  |
| 0  | 2  | 1 | 0 | 4  | 4  | 4  |
| 1  | 1  | 1 | 0 | 3  | 3  | 2  |
| 0  | 0  | 0 | 0 | 4  | 4  | 4  |
| 0  | 0  | 0 | 0 | 4  | 4  | 3  |
| 3  | 2  | 0 | 0 | 4  | 4  | 4  |
| 0  | 1  | 0 | 0 | 4  | 4  | 4  |
| 0  | 1  | 0 | 0 | 0  | 1  | 3  |
| 0  | 0  | 0 | 0 | 99 | 4  | 99 |
| 0  | 0  | 0 | 0 | 4  | 4  | 4  |
| 0  | 0  | 0 | 0 | 4  | 4  | 4  |
| 3  | 0  | 0 | 0 | 4  | 4  | 4  |
| 0  | 0  | 0 | 0 | 2  | 99 | 2  |
| 0  | 1  | 0 | 0 | 4  | 4  | 3  |
| 0  | 1  | 2 | 0 | 4  | 4  | 3  |
| 0  | 0  | 0 | 0 | 4  | 4  | 3  |
| 0  | 1  | 1 | 1 | 4  | 4  | 4  |
| 1  | 0  | 0 | 0 | 4  | 4  | 4  |
| 2  | 1  | 0 | 0 | 3  | 4  | 3  |
| 0  | 0  | 0 | 0 | 4  | 4  | 4  |
| 3  | 0  | 0 | 0 | 2  | 4  | 0  |
| 0  | 1  | 0 | 0 | 4  | 4  | 4  |
| 0  | 1  | 0 | 0 | 4  | 4  | 4  |
| 0  | 1  | 2 | 0 | 3  | 4  | 3  |
| 2  | 1  | 0 | 0 | 3  | 4  | 3  |
| 0  | 1  | 1 | 0 | 4  | 4  | 4  |
| 2  | 3  | 2 | 1 | 2  | 4  | 3  |
| 2  | 2  | 2 | 0 | 4  | 4  | 4  |
| 1  | 1  | 1 | 1 | 4  | 4  | 2  |
| 0  | 4  | 0 | 0 | 4  | 4  | 4  |
| 0  | 0  | 0 | 0 | 4  | 4  | 4  |
| 3  | 2  | 3 | 0 | 3  | 3  | 3  |
| 0  | 1  | 0 | 0 | 4  | 4  | 2  |
| 99 | 99 | 0 | 0 | 99 | 99 | 99 |
| 0  | 2  | 1 | 0 | 1  | 4  | 2  |
| 0  | 0  | 0 | 0 | 4  | 4  | 4  |
| 1  | 0  | 0 | 0 | 4  | 3  | 4  |
| 0  | 0  | 0 | 0 | 4  | 4  | 99 |
| 1  | 0  | 1 | 0 | 4  | 4  | 3  |
| 0  | 0  | 0 | 0 | 4  | 4  | 3  |
| 0  | 3  | 3 | 0 | 4  | 4  | 4  |
| 0  | 3  | 1 | 0 | 4  | 4  | 4  |
| 2  | 3  | 2 | 1 | 3  | 3  | 2  |
| 0  | 0  | 0 | 0 | 4  | 4  | 4  |
| 0  | 0  | 0 | 0 | 2  | 3  | 1  |

|    |    |   |   |   |   |   |
|----|----|---|---|---|---|---|
| 1  | 3  | 4 | 0 | 3 | 4 | 3 |
| 1  | 1  | 1 | 0 | 4 | 4 | 4 |
| 0  | 4  | 2 | 0 | 2 | 3 | 2 |
| 2  | 2  | 0 | 0 | 4 | 4 | 2 |
| 1  | 1  | 0 | 0 | 4 | 4 | 4 |
| 0  | 1  | 2 | 0 | 3 | 4 | 4 |
| 0  | 1  | 0 | 1 | 4 | 4 | 4 |
| 0  | 0  | 0 | 0 | 4 | 4 | 4 |
| 0  | 1  | 0 | 0 | 2 | 4 | 3 |
| 0  | 0  | 0 | 0 | 4 | 4 | 4 |
| 0  | 1  | 0 | 0 | 4 | 4 | 4 |
| 0  | 0  | 0 | 0 | 4 | 4 | 4 |
| 2  | 2  | 2 | 0 | 4 | 4 | 4 |
| 0  | 1  | 0 | 0 | 4 | 4 | 4 |
| 0  | 1  | 0 | 0 | 3 | 4 | 3 |
| 0  | 0  | 0 | 0 | 4 | 4 | 4 |
| 0  | 0  | 0 | 0 | 3 | 4 | 3 |
| 2  | 0  | 0 | 0 | 4 | 4 | 4 |
| 0  | 2  | 0 | 0 | 2 | 3 | 3 |
| 1  | 1  | 0 | 1 | 1 | 2 | 2 |
| 0  | 0  | 0 | 0 | 4 | 4 | 4 |
| 0  | 1  | 0 | 0 | 4 | 3 | 3 |
| 0  | 1  | 1 | 0 | 4 | 4 | 4 |
| 0  | 1  | 1 | 0 | 3 | 4 | 3 |
| 0  | 0  | 0 | 0 | 0 | 0 | 0 |
| 2  | 3  | 0 | 0 | 4 | 4 | 4 |
| 2  | 0  | 0 | 0 | 3 | 2 | 2 |
| 0  | 0  | 0 | 0 | 4 | 4 | 4 |
| 3  | 1  | 0 | 0 | 4 | 4 | 4 |
| 0  | 0  | 0 | 0 | 4 | 4 | 4 |
| 0  | 0  | 0 | 0 | 4 | 4 | 4 |
| 0  | 0  | 0 | 0 | 3 | 3 | 3 |
| 0  | 0  | 0 | 0 | 3 | 4 | 3 |
| 0  | 0  | 0 | 0 | 3 | 3 | 3 |
| 0  | 3  | 0 | 0 | 4 | 4 | 4 |
| 0  | 0  | 0 | 0 | 4 | 4 | 4 |
| 1  | 0  | 0 | 0 | 4 | 4 | 4 |
| 0  | 4  | 0 | 0 | 4 | 4 | 3 |
| 2  | 2  | 1 | 0 | 3 | 4 | 3 |
| 0  | 0  | 0 | 0 | 4 | 4 | 4 |
| 2  | 0  | 0 | 0 | 4 | 4 | 4 |
| 0  | 2  | 2 | 0 | 4 | 4 | 4 |
| 4  | 1  | 4 | 0 | 4 | 4 | 4 |
| 0  | 0  | 0 | 0 | 4 | 2 | 3 |
| 1  | 0  | 0 | 0 | 4 | 4 | 4 |
| 99 | 99 | 0 | 0 | 3 | 4 | 3 |
| 1  | 99 | 0 | 1 | 2 | 4 | 2 |
| 0  | 1  | 0 | 0 | 4 | 4 | 4 |
| 0  | 2  | 2 | 0 | 3 | 3 | 3 |

|   |   |   |   |    |    |    |
|---|---|---|---|----|----|----|
| 0 | 0 | 0 | 0 | 4  | 4  | 4  |
| 2 | 1 | 0 | 0 | 2  | 4  | 2  |
| 0 | 0 | 0 | 0 | 3  | 4  | 2  |
| 0 | 0 | 0 | 0 | 4  | 4  | 4  |
| 0 | 0 | 0 | 0 | 4  | 4  | 4  |
| 0 | 0 | 0 | 0 | 4  | 4  | 4  |
| 4 | 4 | 4 | 1 | 2  | 4  | 1  |
| 0 | 0 | 0 | 0 | 3  | 4  | 3  |
| 0 | 0 | 0 | 0 | 3  | 4  | 4  |
| 0 | 1 | 0 | 1 | 1  | 1  | 3  |
| 0 | 0 | 0 | 0 | 4  | 4  | 4  |
| 0 | 0 | 0 | 0 | 4  | 4  | 4  |
| 0 | 0 | 4 | 0 | 4  | 4  | 4  |
| 0 | 3 | 3 | 1 | 3  | 4  | 1  |
| 1 | 0 | 0 | 0 | 4  | 4  | 2  |
| 0 | 0 | 0 | 0 | 4  | 4  | 4  |
| 0 | 0 | 0 | 0 | 2  | 4  | 0  |
| 0 | 2 | 0 | 0 | 4  | 4  | 3  |
| 0 | 0 | 0 | 0 | 4  | 4  | 4  |
| 0 | 1 | 0 | 0 | 2  | 2  | 2  |
| 0 | 0 | 0 | 0 | 3  | 4  | 1  |
| 0 | 0 | 0 | 0 | 2  | 3  | 2  |
| 4 | 4 | 4 | 4 | 3  | 99 | 99 |
| 0 | 1 | 2 | 1 | 4  | 4  | 4  |
| 1 | 0 | 0 | 0 | 4  | 4  | 4  |
| 0 | 0 | 0 | 0 | 4  | 4  | 4  |
| 1 | 0 | 0 | 0 | 4  | 4  | 0  |
| 0 | 0 | 0 | 0 | 4  | 4  | 4  |
| 0 | 0 | 0 | 0 | 4  | 4  | 4  |
| 0 | 3 | 0 | 0 | 4  | 4  | 4  |
| 0 | 0 | 0 | 0 | 4  | 3  | 4  |
| 1 | 0 | 0 | 0 | 4  | 4  | 4  |
| 0 | 0 | 0 | 0 | 4  | 4  | 4  |
| 0 | 0 | 0 | 0 | 4  | 4  | 4  |
| 0 | 0 | 0 | 0 | 4  | 4  | 4  |
| 0 | 1 | 2 | 0 | 3  | 2  | 1  |
| 0 | 0 | 0 | 0 | 4  | 4  | 4  |
| 0 | 0 | 0 | 0 | 2  | 4  | 1  |
| 0 | 0 | 0 | 0 | 4  | 4  | 3  |
| 0 | 0 | 0 | 0 | 4  | 4  | 4  |
| 0 | 0 | 0 | 0 | 4  | 4  | 4  |
| 0 | 0 | 0 | 0 | 3  | 4  | 3  |
| 0 | 0 | 0 | 0 | 4  | 4  | 3  |
| 0 | 0 | 0 | 0 | 4  | 4  | 4  |
| 0 | 0 | 0 | 0 | 4  | 4  | 4  |
| 0 | 0 | 0 | 0 | 99 | 99 | 99 |
| 0 | 0 | 0 | 0 | 2  | 3  | 2  |
| 0 | 0 | 0 | 0 | 4  | 4  | 4  |
| 0 | 0 | 0 | 0 | 4  | 3  | 3  |
| 0 | 0 | 0 | 0 | 4  | 4  | 4  |
| 2 | 1 | 0 | 0 | 4  | 4  | 4  |
| 0 | 0 | 0 | 0 | 4  | 4  | 4  |

|    |    |    |    |    |    |    |
|----|----|----|----|----|----|----|
| 0  | 0  | 1  | 0  | 4  | 4  | 4  |
| 0  | 2  | 2  | 0  | 3  | 4  | 3  |
| 1  | 0  | 0  | 0  | 4  | 4  | 3  |
| 0  | 0  | 0  | 0  | 4  | 4  | 4  |
| 1  | 4  | 1  | 0  | 2  | 2  | 2  |
| 99 | 99 | 99 | 99 | 99 | 99 | 99 |
| 0  | 0  | 0  | 0  | 4  | 3  | 4  |
| 0  | 1  | 0  | 0  | 4  | 4  | 4  |
| 0  | 0  | 1  | 0  | 4  | 4  | 4  |
| 0  | 0  | 0  | 0  | 4  | 4  | 4  |
| 0  | 0  | 0  | 0  | 4  | 4  | 4  |
| 0  | 0  | 1  | 0  | 4  | 4  | 4  |
| 0  | 1  | 0  | 0  | 4  | 4  | 99 |
| 0  | 0  | 0  | 0  | 0  | 0  | 0  |
| 0  | 1  | 0  | 0  | 4  | 4  | 4  |
| 0  | 0  | 0  | 0  | 4  | 4  | 4  |
| 0  | 0  | 0  | 0  | 4  | 4  | 4  |
| 0  | 0  | 0  | 0  | 4  | 4  | 4  |
| 0  | 0  | 0  | 2  | 4  | 4  | 4  |
| 0  | 1  | 0  | 0  | 4  | 4  | 4  |
| 1  | 3  | 3  | 2  | 2  | 3  | 3  |
| 0  | 0  | 0  | 0  | 3  | 4  | 4  |
| 2  | 3  | 1  | 0  | 2  | 99 | 99 |
| 0  | 0  | 1  | 0  | 4  | 4  | 4  |
| 1  | 2  | 1  | 0  | 4  | 4  | 4  |
| 0  | 1  | 1  | 0  | 4  | 4  | 4  |
| 0  | 0  | 0  | 0  | 0  | 0  | 0  |
| 0  | 0  | 0  | 0  | 0  | 4  | 0  |
| 0  | 0  | 0  | 0  | 99 | 99 | 99 |
| 1  | 0  | 1  | 0  | 4  | 4  | 3  |
| 0  | 2  | 0  | 0  | 4  | 4  | 3  |
| 1  | 1  | 2  | 0  | 4  | 4  | 4  |
| 2  | 0  | 0  | 0  | 0  | 2  | 0  |
| 0  | 0  | 0  | 0  | 4  | 4  | 4  |
| 0  | 0  | 0  | 0  | 4  | 4  | 4  |
| 0  | 0  | 1  | 0  | 4  | 4  | 4  |
| 1  | 2  | 0  | 0  | 4  | 4  | 4  |
| 99 | 99 | 99 | 99 | 99 | 99 | 99 |
| 0  | 2  | 0  | 0  | 3  | 3  | 4  |
| 0  | 0  | 0  | 0  | 4  | 4  | 4  |
| 0  | 1  | 0  | 0  | 4  | 4  | 4  |
| 0  | 0  | 0  | 0  | 3  | 4  | 3  |
| 1  | 0  | 0  | 0  | 4  | 4  | 4  |
| 0  | 0  | 0  | 0  | 4  | 4  | 4  |
| 0  | 1  | 0  | 0  | 3  | 4  | 4  |
| 0  | 0  | 0  | 0  | 4  | 4  | 4  |
| 0  | 0  | 0  | 0  | 4  | 4  | 4  |
| 0  | 0  | 0  | 0  | 1  | 1  | 1  |
| 0  | 0  | 0  | 0  | 4  | 4  | 4  |

|    |    |    |    |    |    |    |
|----|----|----|----|----|----|----|
| 0  | 1  | 0  | 0  | 4  | 3  | 3  |
| 0  | 1  | 0  | 0  | 4  | 4  | 99 |
| 0  | 0  | 0  | 0  | 3  | 3  | 3  |
| 0  | 0  | 0  | 0  | 4  | 4  | 4  |
| 0  | 0  | 0  | 0  | 4  | 2  | 3  |
| 0  | 0  | 0  | 0  | 4  | 4  | 4  |
| 1  | 0  | 2  | 1  | 4  | 4  | 4  |
| 3  | 2  | 0  | 0  | 4  | 4  | 4  |
| 0  | 1  | 0  | 0  | 4  | 4  | 4  |
| 0  | 0  | 0  | 0  | 4  | 4  | 4  |
| 0  | 0  | 0  | 0  | 0  | 99 | 0  |
| 0  | 0  | 0  | 0  | 4  | 4  | 4  |
| 2  | 2  | 0  | 0  | 4  | 4  | 3  |
| 0  | 0  | 0  | 0  | 4  | 4  | 4  |
| 0  | 0  | 0  | 0  | 4  | 4  | 4  |
| 0  | 0  | 0  | 0  | 4  | 4  | 4  |
| 0  | 0  | 0  | 0  | 4  | 4  | 4  |
| 1  | 1  | 0  | 0  | 2  | 1  | 1  |
| 1  | 1  | 1  | 0  | 3  | 3  | 3  |
| 0  | 0  | 0  | 0  | 99 | 4  | 99 |
| 0  | 0  | 0  | 0  | 4  | 4  | 4  |
| 0  | 0  | 0  | 0  | 3  | 3  | 2  |
| 99 | 99 | 99 | 99 | 4  | 4  | 4  |
| 0  | 1  | 0  | 0  | 2  | 3  | 3  |
| 2  | 1  | 2  | 0  | 3  | 4  | 2  |
| 0  | 2  | 1  | 1  | 4  | 4  | 4  |
| 0  | 0  | 0  | 0  | 4  | 4  | 4  |
| 0  | 0  | 0  | 0  | 3  | 4  | 3  |
| 0  | 1  | 1  | 0  | 4  | 4  | 4  |
| 0  | 0  | 0  | 0  | 4  | 4  | 4  |
| 0  | 0  | 0  | 0  | 3  | 4  | 3  |
| 0  | 0  | 0  | 0  | 4  | 4  | 3  |
| 0  | 0  | 0  | 0  | 4  | 4  | 4  |
| 0  | 0  | 0  | 0  | 4  | 3  | 3  |
| 0  | 1  | 1  | 0  | 4  | 4  | 3  |
| 1  | 1  | 2  | 0  | 2  | 99 | 2  |
| 0  | 0  | 0  | 0  | 4  | 4  | 4  |
| 99 | 99 | 99 | 99 | 99 | 99 | 99 |
| 0  | 2  | 0  | 0  | 4  | 4  | 3  |
| 0  | 1  | 0  | 0  | 3  | 4  | 2  |
| 2  | 0  | 0  | 0  | 4  | 3  | 2  |
| 0  | 0  | 1  | 1  | 4  | 4  | 4  |
| 0  | 1  | 0  | 0  | 2  | 2  | 2  |
| 0  | 0  | 0  | 0  | 4  | 4  | 3  |
| 0  | 0  | 0  | 0  | 3  | 4  | 4  |
| 0  | 0  | 0  | 0  | 3  | 4  | 4  |
| 0  | 4  | 0  | 0  | 2  | 1  | 0  |
| 0  | 2  | 1  | 0  | 3  | 4  | 4  |

|    |    |    |    |    |    |    |
|----|----|----|----|----|----|----|
| 99 | 99 | 99 | 99 | 4  | 4  | 99 |
| 0  | 1  | 0  | 0  | 1  | 0  | 1  |
| 1  | 0  | 0  | 0  | 4  | 4  | 4  |
| 0  | 0  | 0  | 0  | 99 | 4  | 99 |
| 0  | 0  | 0  | 0  | 4  | 4  | 4  |
| 0  | 1  | 99 | 0  | 2  | 4  | 2  |
| 0  | 0  | 0  | 0  | 4  | 4  | 4  |
| 0  | 1  | 0  | 0  | 3  | 2  | 2  |
| 0  | 1  | 0  | 0  | 3  | 3  | 2  |
| 0  | 1  | 0  | 0  | 4  | 4  | 4  |
| 0  | 2  | 2  | 0  | 4  | 4  | 4  |
| 0  | 1  | 0  | 0  | 4  | 4  | 4  |
| 0  | 0  | 0  | 0  | 4  | 4  | 4  |
| 1  | 0  | 0  | 0  | 2  | 1  | 2  |
| 0  | 1  | 0  | 0  | 4  | 4  | 4  |
| 1  | 0  | 2  | 0  | 2  | 4  | 3  |
| 0  | 0  | 0  | 0  | 4  | 4  | 4  |
| 0  | 1  | 0  | 0  | 4  | 4  | 4  |
| 4  | 99 | 1  | 0  | 4  | 4  | 4  |
| 1  | 2  | 1  | 0  | 4  | 4  | 4  |
| 0  | 1  | 0  | 0  | 4  | 4  | 3  |
| 0  | 2  | 1  | 0  | 3  | 4  | 4  |
| 99 | 99 | 99 | 99 | 4  | 4  | 99 |
| 0  | 0  | 0  | 0  | 4  | 2  | 3  |
| 1  | 3  | 3  | 1  | 1  | 1  | 0  |
| 0  | 0  | 2  | 0  | 4  | 4  | 4  |
| 99 | 99 | 99 | 99 | 99 | 99 | 99 |
| 0  | 0  | 0  | 0  | 4  | 4  | 4  |
| 3  | 2  | 2  | 2  | 2  | 3  | 2  |
| 0  | 0  | 0  | 0  | 0  | 0  | 0  |
| 0  | 0  | 0  | 0  | 3  | 4  | 2  |
| 0  | 99 | 0  | 0  | 3  | 4  | 3  |
| 0  | 3  | 0  | 0  | 0  | 4  | 0  |
| 1  | 4  | 1  | 0  | 3  | 3  | 2  |
| 1  | 1  | 0  | 0  | 4  | 4  | 4  |
| 0  | 0  | 0  | 0  | 0  | 0  | 0  |
| 0  | 99 | 0  | 0  | 4  | 4  | 4  |
| 0  | 0  | 0  | 0  | 4  | 4  | 4  |
| 0  | 0  | 0  | 0  | 3  | 3  | 3  |
| 4  | 4  | 4  | 4  | 0  | 1  | 0  |
| 0  | 0  | 0  | 0  | 4  | 4  | 4  |
| 1  | 0  | 0  | 0  | 4  | 3  | 4  |
| 2  | 2  | 0  | 0  | 4  | 4  | 3  |
| 0  | 0  | 0  | 0  | 4  | 4  | 4  |
| 3  | 2  | 1  | 0  | 4  | 4  | 3  |
| 0  | 0  | 0  | 0  | 0  | 2  | 0  |
| 99 | 99 | 99 | 99 | 99 | 99 | 99 |
| 2  | 1  | 0  | 0  | 3  | 2  | 3  |



|    |    |    |    |    |    |    |
|----|----|----|----|----|----|----|
| 0  | 2  | 0  | 0  | 2  | 4  | 1  |
| 0  | 0  | 0  | 0  | 4  | 4  | 4  |
| 0  | 0  | 0  | 0  | 0  | 0  | 0  |
| 0  | 0  | 0  | 0  | 3  | 4  | 3  |
| 0  | 1  | 0  | 0  | 4  | 4  | 4  |
| 0  | 0  | 0  | 0  | 4  | 4  | 4  |
| 0  | 0  | 0  | 0  | 4  | 4  | 4  |
| 0  | 1  | 0  | 0  | 4  | 4  | 4  |
| 2  | 0  | 0  | 0  | 4  | 4  | 99 |
| 2  | 2  | 0  | 0  | 4  | 4  | 4  |
| 0  | 0  | 0  | 0  | 3  | 4  | 3  |
| 0  | 0  | 0  | 0  | 4  | 4  | 0  |
| 0  | 0  | 0  | 0  | 4  | 4  | 4  |
| 0  | 0  | 0  | 0  | 0  | 4  | 4  |
| 0  | 1  | 0  | 0  | 4  | 4  | 4  |
| 1  | 1  | 0  | 0  | 4  | 4  | 4  |
| 0  | 0  | 0  | 0  | 4  | 4  | 4  |
| 0  | 0  | 0  | 0  | 4  | 4  | 3  |
| 0  | 0  | 0  | 0  | 4  | 4  | 4  |
| 0  | 0  | 0  | 0  | 4  | 4  | 4  |
| 0  | 0  | 0  | 0  | 4  | 4  | 4  |
| 0  | 0  | 0  | 0  | 3  | 2  | 1  |
| 0  | 0  | 0  | 0  | 4  | 4  | 4  |
| 0  | 0  | 0  | 0  | 2  | 4  | 4  |
| 1  | 0  | 0  | 0  | 4  | 4  | 99 |
| 0  | 4  | 0  | 1  | 4  | 2  | 3  |
| 1  | 1  | 0  | 0  | 4  | 4  | 4  |
| 0  | 0  | 0  | 0  | 4  | 3  | 3  |
| 0  | 0  | 0  | 0  | 4  | 4  | 4  |
| 0  | 0  | 0  | 0  | 4  | 4  | 4  |
| 0  | 0  | 0  | 0  | 4  | 4  | 4  |
| 0  | 0  | 0  | 0  | 2  | 2  | 3  |
| 0  | 0  | 0  | 0  | 3  | 3  | 3  |
| 0  | 0  | 0  | 0  | 4  | 4  | 4  |
| 0  | 0  | 0  | 0  | 4  | 4  | 4  |
| 0  | 1  | 0  | 0  | 4  | 4  | 4  |
| 2  | 1  | 0  | 0  | 4  | 4  | 4  |
| 0  | 0  | 0  | 0  | 4  | 4  | 4  |
| 99 | 99 | 1  | 0  | 4  | 4  | 3  |
| 0  | 0  | 0  | 0  | 3  | 3  | 4  |
| 99 | 99 | 99 | 99 | 99 | 99 | 99 |
| 0  | 0  | 0  | 0  | 4  | 4  | 4  |
| 0  | 0  | 0  | 0  | 4  | 4  | 4  |
| 1  | 2  | 2  | 0  | 4  | 4  | 4  |
| 0  | 2  | 0  | 0  | 3  | 4  | 3  |
| 0  | 0  | 0  | 0  | 1  | 3  | 3  |
| 0  | 0  | 0  | 0  | 1  | 1  | 1  |
| 0  | 0  | 0  | 0  | 3  | 4  | 4  |
| 0  | 0  | 0  | 0  | 4  | 4  | 4  |
| 0  | 1  | 0  | 0  | 4  | 4  | 2  |

|    |    |    |    |    |    |    |
|----|----|----|----|----|----|----|
| 0  | 0  | 0  | 0  | 4  | 4  | 4  |
| 0  | 2  | 1  | 1  | 4  | 4  | 4  |
| 0  | 2  | 0  | 0  | 4  | 4  | 4  |
| 0  | 0  | 0  | 0  | 4  | 4  | 4  |
| 0  | 2  | 2  | 0  | 4  | 4  | 4  |
| 0  | 0  | 0  | 0  | 4  | 4  | 4  |
| 0  | 2  | 1  | 0  | 4  | 4  | 4  |
| 0  | 4  | 0  | 0  | 4  | 4  | 3  |
| 0  | 0  | 0  | 0  | 4  | 4  | 3  |
| 0  | 0  | 0  | 0  | 4  | 4  | 4  |
| 4  | 4  | 4  | 0  | 1  | 1  | 0  |
| 0  | 1  | 1  | 0  | 3  | 4  | 3  |
| 0  | 0  | 0  | 0  | 4  | 4  | 4  |
| 0  | 0  | 0  | 0  | 3  | 3  | 2  |
| 1  | 2  | 0  | 0  | 2  | 4  | 4  |
| 2  | 1  | 2  | 0  | 4  | 4  | 2  |
| 0  | 0  | 0  | 0  | 4  | 3  | 4  |
| 0  | 1  | 2  | 0  | 3  | 4  | 4  |
| 0  | 4  | 0  | 0  | 4  | 4  | 4  |
| 0  | 0  | 0  | 0  | 4  | 4  | 4  |
| 4  | 1  | 2  | 0  | 0  | 0  | 0  |
| 0  | 2  | 2  | 0  | 4  | 4  | 4  |
| 0  | 0  | 0  | 0  | 3  | 4  | 2  |
| 0  | 0  | 0  | 0  | 4  | 4  | 4  |
| 0  | 0  | 0  | 0  | 4  | 4  | 4  |
| 0  | 0  | 0  | 0  | 4  | 4  | 4  |
| 99 | 99 | 99 | 99 | 99 | 4  | 99 |
| 3  | 3  | 1  | 0  | 4  | 4  | 4  |
| 2  | 0  | 0  | 0  | 3  | 4  | 3  |
| 0  | 0  | 0  | 0  | 2  | 4  | 4  |
| 3  | 2  | 0  | 0  | 3  | 4  | 4  |
| 0  | 1  | 0  | 0  | 4  | 4  | 4  |
| 0  | 1  | 0  | 0  | 4  | 4  | 4  |
| 0  | 0  | 0  | 0  | 4  | 4  | 4  |
| 0  | 0  | 0  | 0  | 3  | 4  | 2  |
| 0  | 0  | 0  | 0  | 4  | 4  | 4  |
| 3  | 2  | 0  | 0  | 4  | 4  | 4  |
| 1  | 0  | 0  | 0  | 4  | 4  | 4  |
| 1  | 0  | 0  | 0  | 4  | 4  | 3  |
| 0  | 1  | 0  | 0  | 4  | 4  | 99 |
| 2  | 0  | 0  | 0  | 4  | 4  | 4  |
| 99 | 99 | 99 | 99 | 99 | 99 | 99 |
| 0  | 0  | 0  | 0  | 4  | 4  | 4  |
| 0  | 0  | 0  | 0  | 2  | 3  | 3  |
| 0  | 0  | 0  | 0  | 4  | 4  | 4  |
| 0  | 0  | 0  | 0  | 4  | 4  | 4  |
| 1  | 0  | 0  | 0  | 4  | 4  | 4  |
| 1  | 3  | 1  | 0  | 3  | 2  | 3  |

|    |    |    |    |   |   |   |
|----|----|----|----|---|---|---|
| 1  | 0  | 0  | 0  | 4 | 4 | 4 |
| 1  | 2  | 2  | 0  | 4 | 4 | 4 |
| 0  | 0  | 0  | 0  | 4 | 4 | 4 |
| 0  | 0  | 0  | 0  | 0 | 2 | 0 |
| 0  | 2  | 0  | 0  | 4 | 4 | 3 |
| 0  | 0  | 0  | 0  | 4 | 4 | 4 |
| 0  | 1  | 0  | 0  | 0 | 0 | 3 |
| 2  | 2  | 4  | 0  | 1 | 0 | 3 |
| 0  | 0  | 0  | 0  | 4 | 4 | 4 |
| 0  | 0  | 0  | 0  | 3 | 4 | 3 |
| 3  | 1  | 1  | 0  | 1 | 1 | 2 |
| 0  | 0  | 0  | 0  | 4 | 4 | 4 |
| 0  | 1  | 1  | 0  | 3 | 4 | 3 |
| 0  | 0  | 0  | 0  | 3 | 4 | 3 |
| 0  | 0  | 0  | 0  | 2 | 4 | 2 |
| 0  | 0  | 1  | 0  | 4 | 4 | 4 |
| 0  | 0  | 1  | 0  | 4 | 4 | 3 |
| 0  | 0  | 0  | 0  | 3 | 4 | 2 |
| 0  | 0  | 0  | 0  | 2 | 4 | 2 |
| 0  | 4  | 0  | 0  | 4 | 4 | 2 |
| 0  | 0  | 1  | 99 | 4 | 4 | 3 |
| 0  | 2  | 1  | 1  | 4 | 4 | 3 |
| 1  | 4  | 1  | 0  | 4 | 4 | 3 |
| 0  | 0  | 2  | 1  | 4 | 4 | 4 |
| 0  | 2  | 2  | 0  | 4 | 4 | 4 |
| 0  | 1  | 0  | 0  | 3 | 4 | 4 |
| 0  | 1  | 0  | 0  | 3 | 4 | 2 |
| 0  | 2  | 0  | 1  | 1 | 0 | 4 |
| 0  | 0  | 0  | 0  | 4 | 4 | 4 |
| 0  | 0  | 0  | 0  | 4 | 4 | 4 |
| 0  | 0  | 0  | 0  | 4 | 4 | 4 |
| 0  | 1  | 0  | 0  | 3 | 4 | 4 |
| 0  | 0  | 0  | 0  | 4 | 4 | 4 |
| 0  | 0  | 0  | 0  | 4 | 4 | 3 |
| 0  | 1  | 1  | 1  | 4 | 4 | 3 |
| 0  | 0  | 0  | 0  | 4 | 4 | 4 |
| 0  | 0  | 0  | 0  | 4 | 4 | 4 |
| 1  | 2  | 0  | 0  | 4 | 4 | 4 |
| 0  | 1  | 0  | 0  | 3 | 4 | 4 |
| 0  | 99 | 99 | 99 | 3 | 4 | 3 |
| 0  | 1  | 0  | 0  | 4 | 4 | 4 |
| 0  | 2  | 0  | 0  | 3 | 4 | 2 |
| 1  | 4  | 0  | 0  | 4 | 4 | 3 |
| 99 | 2  | 0  | 0  | 4 | 4 | 4 |
| 0  | 4  | 3  | 1  | 4 | 4 | 4 |
| 0  | 0  | 0  | 0  | 4 | 4 | 4 |
| 0  | 1  | 1  | 0  | 3 | 2 | 3 |
| 0  | 0  | 0  | 0  | 4 | 4 | 4 |
| 0  | 1  | 1  | 0  | 4 | 4 | 3 |

|    |    |    |    |    |    |    |
|----|----|----|----|----|----|----|
| 0  | 0  | 0  | 0  | 4  | 4  | 4  |
| 2  | 3  | 0  | 0  | 4  | 4  | 4  |
| 0  | 0  | 0  | 0  | 4  | 4  | 4  |
| 1  | 99 | 0  | 0  | 4  | 4  | 4  |
| 0  | 0  | 0  | 0  | 4  | 4  | 3  |
| 0  | 0  | 2  | 0  | 3  | 4  | 2  |
| 0  | 0  | 0  | 0  | 4  | 4  | 4  |
| 2  | 2  | 2  | 0  | 4  | 3  | 4  |
| 2  | 0  | 0  | 0  | 4  | 4  | 4  |
| 0  | 0  | 0  | 0  | 3  | 4  | 4  |
| 0  | 1  | 0  | 0  | 3  | 4  | 4  |
| 0  | 99 | 2  | 0  | 3  | 4  | 3  |
| 0  | 1  | 0  | 0  | 4  | 4  | 4  |
| 0  | 2  | 1  | 0  | 4  | 4  | 3  |
| 0  | 1  | 0  | 0  | 4  | 4  | 4  |
| 0  | 0  | 0  | 0  | 4  | 4  | 4  |
| 0  | 3  | 2  | 2  | 4  | 4  | 4  |
| 0  | 0  | 0  | 0  | 3  | 3  | 3  |
| 99 | 99 | 99 | 99 | 0  | 99 | 99 |
| 0  | 0  | 0  | 0  | 0  | 0  | 0  |
| 0  | 1  | 0  | 0  | 4  | 4  | 3  |
| 2  | 3  | 0  | 0  | 3  | 4  | 4  |
| 0  | 0  | 0  | 0  | 2  | 4  | 2  |
| 0  | 0  | 0  | 0  | 4  | 4  | 4  |
| 0  | 0  | 0  | 0  | 4  | 4  | 4  |
| 0  | 1  | 0  | 0  | 99 | 1  | 1  |
| 0  | 0  | 0  | 0  | 3  | 4  | 3  |
| 0  | 1  | 0  | 0  | 4  | 4  | 0  |
| 1  | 0  | 0  | 0  | 2  | 4  | 3  |
| 3  | 4  | 4  | 4  | 4  | 4  | 3  |
| 0  | 0  | 0  | 0  | 0  | 0  | 0  |
| 0  | 1  | 0  | 0  | 4  | 4  | 4  |
| 0  | 1  | 0  | 0  | 4  | 4  | 3  |
| 0  | 0  | 0  | 0  | 4  | 4  | 4  |
| 0  | 0  | 0  | 0  | 4  | 4  | 4  |
| 0  | 1  | 1  | 0  | 4  | 4  | 4  |
| 0  | 0  | 0  | 0  | 4  | 4  | 4  |
| 0  | 0  | 0  | 0  | 4  | 4  | 4  |
| 0  | 0  | 0  | 0  | 4  | 4  | 4  |
| 0  | 0  | 0  | 0  | 99 | 4  | 0  |
| 0  | 0  | 1  | 0  | 4  | 4  | 2  |
| 0  | 0  | 0  | 0  | 4  | 4  | 4  |
| 0  | 0  | 0  | 0  | 4  | 4  | 99 |
| 1  | 0  | 0  | 0  | 3  | 2  | 3  |
| 0  | 0  | 0  | 0  | 4  | 4  | 4  |
| 0  | 0  | 2  | 4  | 4  | 4  | 3  |
| 0  | 0  | 0  | 0  | 4  | 4  | 4  |
| 0  | 0  | 0  | 0  | 4  | 4  | 4  |
| 2  | 1  | 3  | 0  | 0  | 0  | 1  |

|    |    |    |    |    |    |    |
|----|----|----|----|----|----|----|
| 0  | 0  | 0  | 0  | 4  | 4  | 4  |
| 0  | 1  | 0  | 0  | 4  | 4  | 4  |
| 0  | 1  | 0  | 0  | 4  | 4  | 4  |
| 0  | 0  | 2  | 0  | 4  | 4  | 3  |
| 0  | 0  | 0  | 1  | 3  | 4  | 4  |
| 0  | 0  | 2  | 0  | 1  | 1  | 0  |
| 0  | 4  | 2  | 0  | 4  | 4  | 4  |
| 2  | 0  | 0  | 0  | 4  | 4  | 3  |
| 2  | 3  | 0  | 0  | 4  | 4  | 4  |
| 0  | 0  | 0  | 0  | 4  | 3  | 4  |
| 99 | 99 | 99 | 99 | 99 | 99 | 99 |
| 0  | 2  | 2  | 0  | 4  | 4  | 4  |
| 0  | 0  | 0  | 0  | 4  | 4  | 4  |
| 1  | 1  | 1  | 0  | 4  | 4  | 4  |
| 0  | 0  | 0  | 1  | 4  | 4  | 3  |
| 2  | 1  | 0  | 0  | 4  | 4  | 4  |
| 0  | 1  | 0  | 0  | 4  | 4  | 4  |
| 0  | 0  | 0  | 0  | 4  | 4  | 4  |
| 0  | 0  | 0  | 1  | 4  | 4  | 3  |
| 1  | 4  | 0  | 0  | 0  | 1  | 0  |
| 1  | 2  | 0  | 0  | 4  | 4  | 3  |
| 0  | 1  | 2  | 0  | 4  | 4  | 4  |
| 0  | 0  | 0  | 0  | 4  | 4  | 4  |
| 2  | 2  | 2  | 2  | 0  | 1  | 0  |
| 0  | 0  | 0  | 0  | 4  | 4  | 4  |
| 2  | 2  | 2  | 0  | 2  | 2  | 2  |
| 0  | 2  | 0  | 0  | 4  | 4  | 4  |
| 0  | 4  | 3  | 0  | 2  | 3  | 2  |
| 1  | 0  | 0  | 0  | 4  | 4  | 4  |
| 1  | 1  | 0  | 0  | 4  | 4  | 4  |
| 0  | 4  | 4  | 0  | 3  | 3  | 3  |
| 2  | 4  | 4  | 0  | 4  | 4  | 1  |
| 0  | 2  | 1  | 0  | 3  | 3  | 3  |
| 0  | 1  | 0  | 0  | 4  | 4  | 4  |
| 0  | 2  | 2  | 0  | 4  | 4  | 4  |
| 0  | 0  | 0  | 0  | 4  | 4  | 4  |
| 0  | 0  | 0  | 0  | 4  | 4  | 4  |
| 0  | 0  | 0  | 0  | 4  | 4  | 4  |
| 0  | 0  | 0  | 0  | 4  | 4  | 4  |
| 0  | 0  | 0  | 0  | 4  | 4  | 4  |
| 0  | 0  | 0  | 0  | 4  | 4  | 4  |
| 0  | 1  | 0  | 0  | 0  | 4  | 4  |
| 0  | 0  | 0  | 0  | 4  | 4  | 3  |
| 1  | 2  | 0  | 0  | 3  | 3  | 4  |
| 0  | 2  | 0  | 0  | 0  | 1  | 4  |
| 0  | 0  | 0  | 0  | 4  | 4  | 4  |
| 0  | 2  | 2  | 0  | 2  | 2  | 2  |
| 0  | 3  | 0  | 0  | 4  | 4  | 4  |
| 3  | 99 | 0  | 0  | 4  | 4  | 4  |
| 1  | 3  | 1  | 0  | 1  | 2  | 1  |

|   |    |    |    |   |   |    |
|---|----|----|----|---|---|----|
| 0 | 0  | 0  | 0  | 4 | 4 | 4  |
| 0 | 1  | 0  | 0  | 4 | 4 | 2  |
| 1 | 2  | 2  | 0  | 4 | 4 | 4  |
| 1 | 4  | 0  | 0  | 2 | 2 | 3  |
| 0 | 1  | 3  | 0  | 4 | 4 | 4  |
| 0 | 0  | 0  | 0  | 2 | 3 | 2  |
| 0 | 0  | 0  | 0  | 3 | 4 | 3  |
| 0 | 0  | 0  | 0  | 4 | 4 | 4  |
| 0 | 0  | 0  | 0  | 0 | 0 | 0  |
| 0 | 1  | 2  | 0  | 4 | 4 | 4  |
| 1 | 3  | 4  | 1  | 3 | 4 | 4  |
| 1 | 0  | 0  | 0  | 3 | 4 | 4  |
| 0 | 0  | 0  | 0  | 4 | 4 | 4  |
| 0 | 0  | 0  | 0  | 0 | 0 | 0  |
| 1 | 0  | 0  | 0  | 4 | 4 | 99 |
| 0 | 4  | 0  | 0  | 4 | 4 | 4  |
| 0 | 0  | 0  | 0  | 0 | 0 | 0  |
| 0 | 0  | 1  | 0  | 4 | 3 | 99 |
| 0 | 0  | 0  | 0  | 4 | 4 | 0  |
| 1 | 0  | 0  | 0  | 3 | 4 | 2  |
| 1 | 0  | 0  | 0  | 0 | 0 | 0  |
| 1 | 1  | 0  | 0  | 4 | 4 | 4  |
| 0 | 1  | 0  | 0  | 4 | 4 | 3  |
| 0 | 99 | 99 | 99 | 4 | 4 | 0  |
| 0 | 1  | 1  | 0  | 3 | 3 | 2  |
| 0 | 2  | 2  | 1  | 3 | 4 | 2  |
| 0 | 1  | 1  | 0  | 4 | 4 | 4  |
| 0 | 0  | 0  | 0  | 4 | 4 | 4  |
| 0 | 3  | 0  | 0  | 4 | 3 | 3  |
| 0 | 0  | 0  | 0  | 2 | 3 | 3  |
| 0 | 3  | 0  | 4  | 4 | 4 | 4  |
| 0 | 0  | 0  | 0  | 4 | 4 | 4  |
| 1 | 2  | 0  | 0  | 4 | 4 | 4  |
| 4 | 0  | 0  | 0  | 2 | 3 | 1  |
| 2 | 0  | 0  | 0  | 4 | 4 | 3  |
| 0 | 3  | 0  | 1  | 3 | 3 | 4  |
| 1 | 4  | 0  | 0  | 1 | 2 | 1  |
| 0 | 0  | 0  | 0  | 3 | 4 | 2  |
| 4 | 1  | 0  | 0  | 3 | 3 | 3  |
| 0 | 0  | 0  | 0  | 4 | 4 | 4  |
| 0 | 0  | 0  | 0  | 4 | 4 | 4  |
| 1 | 1  | 0  | 0  | 4 | 4 | 4  |
| 0 | 0  | 0  | 0  | 4 | 4 | 4  |
| 1 | 3  | 2  | 0  | 4 | 3 | 3  |
| 0 | 0  | 0  | 0  | 3 | 3 | 3  |
| 1 | 1  | 2  | 0  | 4 | 4 | 3  |
| 0 | 0  | 0  | 0  | 4 | 4 | 4  |
| 0 | 0  | 0  | 0  | 4 | 4 | 4  |

|    |    |   |   |    |    |    |
|----|----|---|---|----|----|----|
| 0  | 3  | 1 | 0 | 4  | 4  | 4  |
| 3  | 1  | 0 | 0 | 4  | 4  | 4  |
| 0  | 0  | 0 | 0 | 4  | 4  | 4  |
| 0  | 0  | 0 | 0 | 4  | 4  | 99 |
| 0  | 0  | 0 | 0 | 4  | 4  | 4  |
| 0  | 0  | 0 | 0 | 3  | 4  | 2  |
| 1  | 1  | 0 | 0 | 3  | 4  | 4  |
| 1  | 0  | 2 | 2 | 4  | 4  | 4  |
| 2  | 0  | 0 | 0 | 4  | 4  | 4  |
| 2  | 0  | 0 | 0 | 4  | 4  | 4  |
| 0  | 4  | 4 | 0 | 4  | 3  | 4  |
| 1  | 0  | 0 | 0 | 4  | 4  | 4  |
| 0  | 0  | 0 | 0 | 4  | 4  | 4  |
| 0  | 0  | 0 | 0 | 4  | 4  | 3  |
| 0  | 4  | 0 | 0 | 2  | 3  | 2  |
| 0  | 1  | 1 | 0 | 4  | 4  | 4  |
| 2  | 2  | 0 | 0 | 2  | 4  | 3  |
| 0  | 0  | 0 | 0 | 4  | 4  | 4  |
| 2  | 0  | 0 | 0 | 4  | 4  | 4  |
| 0  | 0  | 0 | 0 | 4  | 4  | 4  |
| 0  | 0  | 0 | 0 | 99 | 99 | 99 |
| 0  | 0  | 0 | 0 | 4  | 4  | 4  |
| 0  | 0  | 0 | 0 | 4  | 4  | 4  |
| 2  | 2  | 2 | 2 | 3  | 4  | 3  |
| 0  | 0  | 0 | 0 | 2  | 4  | 2  |
| 1  | 2  | 1 | 0 | 4  | 4  | 4  |
| 0  | 0  | 0 | 0 | 4  | 4  | 4  |
| 0  | 0  | 0 | 0 | 4  | 4  | 4  |
| 0  | 0  | 0 | 0 | 4  | 4  | 4  |
| 0  | 0  | 0 | 0 | 4  | 4  | 4  |
| 0  | 0  | 2 | 0 | 4  | 3  | 3  |
| 0  | 0  | 0 | 0 | 3  | 4  | 3  |
| 99 | 99 | 0 | 0 | 4  | 4  | 4  |
| 99 | 1  | 0 | 1 | 3  | 2  | 3  |
| 0  | 0  | 0 | 0 | 3  | 3  | 3  |
| 1  | 0  | 0 | 0 | 4  | 4  | 4  |
| 0  | 0  | 0 | 0 | 4  | 4  | 4  |
| 0  | 0  | 0 | 0 | 2  | 3  | 2  |
| 0  | 0  | 0 | 0 | 2  | 0  | 0  |
| 0  | 0  | 0 | 0 | 0  | 0  | 0  |
| 0  | 0  | 0 | 0 | 4  | 4  | 4  |
| 0  | 0  | 0 | 0 | 4  | 4  | 4  |
| 1  | 1  | 1 | 0 | 4  | 4  | 4  |
| 0  | 1  | 0 | 0 | 4  | 4  | 4  |
| 0  | 2  | 0 | 0 | 4  | 4  | 4  |
| 0  | 2  | 0 | 0 | 4  | 4  | 4  |
| 0  | 0  | 0 | 0 | 3  | 3  | 3  |
| 0  | 3  | 1 | 0 | 4  | 2  | 1  |
| 0  | 0  | 0 | 0 | 99 | 4  | 4  |
| 0  | 0  | 0 | 0 | 4  | 4  | 99 |
| 0  | 1  | 0 | 0 | 2  | 2  | 3  |

|   |    |   |   |    |    |    |
|---|----|---|---|----|----|----|
| 0 | 0  | 0 | 0 | 4  | 4  | 3  |
| 0 | 0  | 0 | 0 | 4  | 4  | 4  |
| 0 | 1  | 0 | 0 | 0  | 1  | 0  |
| 0 | 0  | 0 | 0 | 3  | 3  | 2  |
| 0 | 0  | 0 | 0 | 4  | 4  | 4  |
| 0 | 0  | 0 | 0 | 4  | 4  | 4  |
| 0 | 0  | 0 | 0 | 4  | 4  | 4  |
| 0 | 2  | 0 | 2 | 4  | 4  | 4  |
| 0 | 1  | 0 | 0 | 4  | 4  | 4  |
| 0 | 1  | 0 | 0 | 4  | 4  | 4  |
| 0 | 0  | 0 | 0 | 2  | 4  | 1  |
| 4 | 99 | 2 | 0 | 99 | 99 | 99 |
| 0 | 4  | 0 | 0 | 4  | 4  | 4  |
| 0 | 0  | 0 | 0 | 4  | 4  | 4  |
| 0 | 0  | 1 | 0 | 99 | 4  | 0  |
| 2 | 2  | 2 | 0 | 4  | 4  | 4  |
| 0 | 0  | 0 | 0 | 4  | 4  | 4  |
| 0 | 1  | 0 | 0 | 3  | 4  | 4  |
| 0 | 0  | 1 | 0 | 4  | 4  | 4  |
| 0 | 0  | 0 | 0 | 4  | 4  | 4  |
| 0 | 0  | 0 | 0 | 4  | 4  | 4  |
| 1 | 0  | 2 | 0 | 4  | 4  | 4  |
| 0 | 0  | 0 | 0 | 3  | 4  | 4  |
| 0 | 0  | 0 | 0 | 4  | 4  | 4  |
| 0 | 0  | 0 | 0 | 3  | 4  | 3  |
| 0 | 1  | 0 | 1 | 2  | 4  | 0  |
| 0 | 0  | 1 | 0 | 1  | 1  | 0  |
| 0 | 0  | 0 | 0 | 0  | 99 | 0  |
| 0 | 0  | 0 | 0 | 1  | 1  | 0  |
| 1 | 3  | 1 | 3 | 4  | 4  | 4  |
| 1 | 4  | 1 | 2 | 4  | 4  | 4  |
| 0 | 0  | 1 | 0 | 4  | 3  | 4  |
| 0 | 0  | 2 | 0 | 4  | 4  | 4  |
| 2 | 2  | 2 | 0 | 4  | 4  | 4  |
| 0 | 0  | 0 | 0 | 4  | 4  | 4  |
| 1 | 0  | 0 | 0 | 0  | 2  | 0  |
| 0 | 0  | 1 | 0 | 1  | 2  | 3  |
| 0 | 2  | 0 | 0 | 4  | 4  | 3  |
| 0 | 0  | 0 | 0 | 3  | 3  | 2  |
| 0 | 0  | 0 | 0 | 4  | 4  | 4  |
| 0 | 0  | 0 | 0 | 3  | 3  | 3  |
| 1 | 0  | 0 | 0 | 3  | 4  | 3  |
| 3 | 3  | 3 | 2 | 4  | 4  | 4  |
| 0 | 0  | 0 | 0 | 4  | 4  | 4  |
| 0 | 4  | 4 | 0 | 3  | 4  | 3  |
| 0 | 0  | 0 | 0 | 4  | 4  | 4  |
| 0 | 0  | 0 | 0 | 4  | 4  | 4  |
| 2 | 2  | 1 | 0 | 2  | 2  | 2  |



|    |    |   |   |   |   |   |
|----|----|---|---|---|---|---|
| 0  | 0  | 0 | 0 | 4 | 4 | 3 |
| 0  | 4  | 4 | 0 | 2 | 2 | 2 |
| 0  | 0  | 0 | 0 | 4 | 4 | 4 |
| 0  | 0  | 0 | 0 | 4 | 4 | 4 |
| 0  | 0  | 0 | 0 | 4 | 4 | 4 |
| 3  | 3  | 3 | 0 | 4 | 4 | 4 |
| 1  | 0  | 1 | 0 | 4 | 4 | 4 |
| 0  | 4  | 3 | 0 | 4 | 4 | 3 |
| 1  | 2  | 4 | 0 | 2 | 3 | 2 |
| 0  | 2  | 0 | 0 | 4 | 4 | 4 |
| 1  | 0  | 1 | 0 | 3 | 4 | 4 |
| 0  | 0  | 0 | 0 | 4 | 4 | 3 |
| 1  | 1  | 1 | 0 | 4 | 4 | 3 |
| 1  | 2  | 1 | 0 | 3 | 4 | 3 |
| 0  | 2  | 1 | 1 | 4 | 4 | 4 |
| 0  | 0  | 0 | 0 | 4 | 4 | 3 |
| 0  | 0  | 0 | 0 | 4 | 4 | 4 |
| 0  | 2  | 0 | 0 | 3 | 3 | 3 |
| 0  | 1  | 0 | 0 | 4 | 4 | 3 |
| 0  | 0  | 0 | 0 | 4 | 4 | 4 |
| 0  | 1  | 0 | 1 | 4 | 4 | 3 |
| 0  | 2  | 2 | 0 | 1 | 4 | 2 |
| 99 | 99 | 0 | 0 | 4 | 4 | 1 |
| 0  | 0  | 0 | 0 | 4 | 4 | 4 |
| 0  | 0  | 0 | 0 | 4 | 4 | 4 |
| 99 | 1  | 1 | 0 | 3 | 3 | 2 |
| 1  | 0  | 2 | 0 | 4 | 2 | 3 |
| 0  | 0  | 0 | 0 | 4 | 4 | 4 |
| 0  | 0  | 0 | 0 | 4 | 4 | 4 |
| 0  | 0  | 0 | 0 | 4 | 4 | 4 |
| 0  | 1  | 0 | 0 | 4 | 4 | 3 |
| 0  | 0  | 0 | 0 | 4 | 4 | 4 |
| 0  | 0  | 0 | 0 | 4 | 4 | 4 |
| 0  | 0  | 0 | 0 | 4 | 4 | 4 |
| 0  | 0  | 0 | 0 | 4 | 4 | 4 |
| 0  | 0  | 0 | 0 | 4 | 4 | 4 |
| 1  | 0  | 0 | 0 | 4 | 4 | 4 |
| 0  | 0  | 1 | 0 | 4 | 4 | 4 |
| 0  | 0  | 0 | 0 | 0 | 1 | 0 |
| 0  | 1  | 0 | 0 | 4 | 4 | 4 |
| 0  | 1  | 0 | 0 | 4 | 3 | 4 |
| 0  | 0  | 0 | 0 | 4 | 4 | 3 |
| 0  | 4  | 2 | 1 | 2 | 4 | 1 |
| 0  | 0  | 1 | 0 | 3 | 4 | 4 |
| 1  | 4  | 3 | 0 | 4 | 4 | 2 |
| 3  | 2  | 0 | 0 | 4 | 4 | 3 |
| 0  | 0  | 0 | 0 | 4 | 4 | 4 |
| 4  | 1  | 2 | 0 | 3 | 3 | 2 |
| 0  | 0  | 0 | 0 | 4 | 4 | 4 |
| 0  | 0  | 0 | 0 | 3 | 3 | 3 |

|   |   |   |   |    |    |    |
|---|---|---|---|----|----|----|
| 1 | 3 | 2 | 0 | 3  | 3  | 1  |
| 0 | 0 | 0 | 0 | 3  | 4  | 4  |
| 4 | 2 | 1 | 0 | 3  | 3  | 2  |
| 0 | 0 | 0 | 0 | 4  | 4  | 4  |
| 0 | 1 | 0 | 0 | 4  | 4  | 4  |
| 2 | 3 | 4 | 3 | 3  | 4  | 4  |
| 0 | 0 | 0 | 0 | 4  | 4  | 4  |
| 0 | 0 | 0 | 0 | 4  | 4  | 4  |
| 0 | 0 | 0 | 0 | 4  | 4  | 4  |
| 0 | 2 | 0 | 0 | 4  | 4  | 4  |
| 0 | 0 | 0 | 0 | 4  | 4  | 4  |
| 0 | 0 | 0 | 0 | 4  | 4  | 4  |
| 0 | 0 | 0 | 0 | 4  | 4  | 4  |
| 0 | 0 | 0 | 0 | 4  | 4  | 4  |
| 0 | 2 | 0 | 0 | 3  | 3  | 2  |
| 0 | 0 | 0 | 0 | 4  | 4  | 4  |
| 0 | 2 | 0 | 0 | 3  | 3  | 3  |
| 1 | 3 | 0 | 0 | 0  | 4  | 0  |
| 0 | 0 | 0 | 0 | 99 | 99 | 99 |
| 0 | 0 | 0 | 0 | 4  | 4  | 4  |
| 1 | 0 | 0 | 0 | 4  | 4  | 4  |
| 0 | 4 | 1 | 0 | 4  | 4  | 4  |
| 0 | 1 | 0 | 0 | 4  | 4  | 4  |
| 0 | 0 | 0 | 0 | 3  | 4  | 3  |
| 0 | 0 | 2 | 0 | 0  | 2  | 0  |
| 0 | 2 | 0 | 0 | 4  | 2  | 3  |
| 0 | 1 | 0 | 0 | 1  | 4  | 1  |
| 0 | 1 | 0 | 0 | 4  | 4  | 4  |
| 0 | 0 | 0 | 0 | 4  | 4  | 4  |
| 0 | 0 | 0 | 0 | 4  | 4  | 4  |
| 0 | 0 | 0 | 0 | 4  | 4  | 4  |
| 0 | 0 | 0 | 0 | 4  | 4  | 4  |
| 1 | 0 | 0 | 0 | 4  | 4  | 4  |
| 1 | 3 | 1 | 0 | 4  | 4  | 4  |
| 0 | 1 | 3 | 0 | 2  | 2  | 3  |
| 0 | 0 | 0 | 0 | 4  | 4  | 3  |
| 0 | 0 | 0 | 0 | 4  | 4  | 4  |
| 2 | 0 | 0 | 0 | 4  | 4  | 4  |
| 0 | 0 | 0 | 0 | 3  | 3  | 2  |
| 2 | 2 | 2 | 1 | 4  | 4  | 4  |
| 0 | 0 | 0 | 0 | 4  | 4  | 4  |
| 0 | 2 | 0 | 0 | 4  | 4  | 4  |
| 0 | 1 | 0 | 0 | 4  | 4  | 4  |
| 1 | 0 | 1 | 0 | 3  | 3  | 3  |
| 0 | 0 | 0 | 0 | 4  | 4  | 4  |
| 1 | 2 | 0 | 0 | 4  | 4  | 4  |
| 0 | 1 | 0 | 2 | 3  | 4  | 3  |
| 2 | 0 | 0 | 0 | 4  | 4  | 4  |
| 0 | 0 | 0 | 0 | 3  | 4  | 2  |
| 0 | 0 | 0 | 0 | 4  | 4  | 4  |

|        |        |        |        |   |   |   |
|--------|--------|--------|--------|---|---|---|
| 0      | 0      | 0      | 0      | 2 | 2 | 2 |
| 0      | 1      | 1      | 0      | 4 | 4 | 4 |
| 0      | 0      | 0      | 0      | 4 | 4 | 4 |
| #NULL! | #NULL! | #NULL! | #NULL! | 2 | 4 | 4 |
| #NULL! | #NULL! | #NULL! | #NULL! | 4 | 4 | 4 |
| #NULL! | #NULL! | #NULL! | #NULL! | 4 | 4 | 3 |
| #NULL! | #NULL! | #NULL! | #NULL! | 4 | 4 | 4 |
| #NULL! | #NULL! | #NULL! | #NULL! | 1 | 1 | 1 |
| #NULL! | #NULL! | #NULL! | #NULL! | 2 | 2 | 1 |
| #NULL! | #NULL! | #NULL! | #NULL! | 2 | 2 | 1 |
| #NULL! | #NULL! | #NULL! | #NULL! | 4 | 4 | 3 |
| #NULL! | #NULL! | #NULL! | #NULL! | 0 | 2 | 0 |
| #NULL! | #NULL! | #NULL! | #NULL! | 4 | 4 | 4 |
| #NULL! | #NULL! | #NULL! | #NULL! | 4 | 4 | 3 |
| #NULL! | #NULL! | #NULL! | #NULL! | 3 | 4 | 3 |
| #NULL! | #NULL! | #NULL! | #NULL! | 2 | 4 | 3 |
| #NULL! | #NULL! | #NULL! | #NULL! | 2 | 3 | 2 |
| #NULL! | #NULL! | #NULL! | #NULL! | 4 | 4 | 3 |
| #NULL! | #NULL! | #NULL! | #NULL! | 4 | 4 | 4 |
| #NULL! | #NULL! | #NULL! | #NULL! | 2 | 4 | 3 |
| #NULL! | #NULL! | #NULL! | #NULL! | 4 | 4 | 4 |
| #NULL! | #NULL! | #NULL! | #NULL! | 4 | 4 | 4 |
| #NULL! | #NULL! | #NULL! | #NULL! | 4 | 4 | 4 |
| #NULL! | #NULL! | #NULL! | #NULL! | 3 | 4 | 4 |
| #NULL! | #NULL! | #NULL! | #NULL! | 0 | 0 | 0 |
| #NULL! | #NULL! | #NULL! | #NULL! | 4 | 4 | 4 |
| #NULL! | #NULL! | #NULL! | #NULL! | 4 | 4 | 4 |
| #NULL! | #NULL! | #NULL! | #NULL! | 4 | 4 | 4 |
| #NULL! | #NULL! | #NULL! | #NULL! | 4 | 4 | 4 |
| #NULL! | #NULL! | #NULL! | #NULL! | 4 | 4 | 4 |
| #NULL! | #NULL! | #NULL! | #NULL! | 4 | 4 | 4 |
| #NULL! | #NULL! | #NULL! | #NULL! | 4 | 4 | 4 |
| #NULL! | #NULL! | #NULL! | #NULL! | 4 | 4 | 4 |
| #NULL! | #NULL! | #NULL! | #NULL! | 4 | 4 | 4 |
| #NULL! | #NULL! | #NULL! | #NULL! | 1 | 2 | 2 |
| #NULL! | #NULL! | #NULL! | #NULL! | 3 | 4 | 3 |
| #NULL! | #NULL! | #NULL! | #NULL! | 4 | 4 | 4 |
| #NULL! | #NULL! | #NULL! | #NULL! | 4 | 4 | 4 |
| #NULL! | #NULL! | #NULL! | #NULL! | 4 | 3 | 4 |
| #NULL! | #NULL! | #NULL! | #NULL! | 2 | 1 | 2 |
| #NULL! | #NULL! | #NULL! | #NULL! | 2 | 2 | 2 |
| #NULL! | #NULL! | #NULL! | #NULL! | 4 | 4 | 4 |
| #NULL! | #NULL! | #NULL! | #NULL! | 4 | 4 | 4 |
| #NULL! | #NULL! | #NULL! | #NULL! | 4 | 4 | 4 |
| #NULL! | #NULL! | #NULL! | #NULL! | 1 | 2 | 1 |
| #NULL! | #NULL! | #NULL! | #NULL! | 1 | 2 | 1 |
| #NULL! | #NULL! | #NULL! | #NULL! | 0 | 0 | 0 |
| #NULL! | #NULL! | #NULL! | #NULL! | 4 | 4 | 4 |
| #NULL! | #NULL! | #NULL! | #NULL! | 4 | 4 | 4 |
| #NULL! | #NULL! | #NULL! | #NULL! | 0 | 4 | 2 |
| #NULL! | #NULL! | #NULL! | #NULL! | 4 | 2 | 4 |
| #NULL! | #NULL! | #NULL! | #NULL! | 3 | 4 | 3 |
| #NULL! | #NULL! | #NULL! | #NULL! | 3 | 4 | 2 |
| #NULL! | #NULL! | #NULL! | #NULL! | 4 | 4 | 3 |



|        |        |        |        |        |        |        |
|--------|--------|--------|--------|--------|--------|--------|
| #NULL! | #NULL! | #NULL! | #NULL! | 4      | 3      | 4      |
| #NULL! | #NULL! | #NULL! | #NULL! | 4      | 4      | 4      |
| #NULL! | #NULL! | #NULL! | #NULL! | 4      | 4      | 4      |
| #NULL! | #NULL! | #NULL! | #NULL! | 4      | 4      | 4      |
| #NULL! | #NULL! | #NULL! | #NULL! | 4      | 4      | 4      |
| #NULL! | #NULL! | #NULL! | #NULL! | 3      | 4      | 4      |
| #NULL! | #NULL! | #NULL! | #NULL! | 4      | 4      | 4      |
| #NULL! | #NULL! | #NULL! | #NULL! | 4      | 4      | 4      |
| #NULL! | #NULL! | #NULL! | #NULL! | 4      | 4      | 4      |
| #NULL! | #NULL! | #NULL! | #NULL! | 4      | 4      | 4      |
| #NULL! | #NULL! | #NULL! | #NULL! | 4      | 4      | 3      |
| #NULL! | #NULL! | #NULL! | #NULL! | 4      | 4      | 4      |
| #NULL! | #NULL! | #NULL! | #NULL! | 4      | 4      | 4      |
| #NULL! | #NULL! | #NULL! | #NULL! | 4      | 4      | 4      |
| #NULL! | #NULL! | #NULL! | #NULL! | 4      | 4      | 4      |
| #NULL! | #NULL! | #NULL! | #NULL! | 2      | 4      | 2      |
| #NULL! | #NULL! | #NULL! | #NULL! | 3      | 4      | 3      |
| #NULL! | #NULL! | #NULL! | #NULL! | #NULL! | #NULL! | #NULL! |
| #NULL! | #NULL! | #NULL! | #NULL! | 4      | 4      | 4      |
| #NULL! | #NULL! | #NULL! | #NULL! | 4      | 4      | 4      |
| #NULL! | #NULL! | #NULL! | #NULL! | 4      | 4      | 4      |
| #NULL! | #NULL! | #NULL! | #NULL! | 3      | 4      | 3      |

| pconnectd_pre | pconnecte_pre | sconnecta_pre | sconnectb_pre | sconnectc_pre | sconnectd_pre |
|---------------|---------------|---------------|---------------|---------------|---------------|
| 4             | 4             | 2             | 3             | 3             | 3             |
| 99            | 99            | 99            | 4             | 4             | 4             |
| 0             | 1             | 1             | 3             | 1             | 3             |
| 4             | 4             | 3             | 4             | 3             | 2             |
| 4             | 4             | 3             | 4             | 4             | 4             |
| 99            | 99            | 99            | 99            | 99            | 99            |
| 4             | 4             | 99            | 4             | 4             | 4             |
| 0             | 0             | 2             | 1             | 2             | 2             |
| 99            | 99            | 99            | 99            | 99            | 99            |
| 3             | 2             | 3             | 3             | 3             | 2             |
| 99            | 99            | 3             | 4             | 2             | 2             |
| 4             | 4             | 3             | 3             | 3             | 3             |
| 4             | 4             | 3             | 3             | 3             | 3             |
| 1             | 0             | 3             | 3             | 3             | 3             |
| 4             | 4             | 99            | 4             | 4             | 4             |
| 0             | 0             | 2             | 3             | 3             | 3             |
| 4             | 4             | 4             | 4             | 3             | 4             |
| 3             | 2             | 3             | 2             | 3             | 2             |
| 4             | 4             | 3             | 3             | 3             | 3             |
| 1             | 0             | 4             | 4             | 4             | 3             |
| 99            | 99            | 99            | 99            | 99            | 99            |
| 4             | 4             | 1             | 4             | 4             | 4             |
| 4             | 3             | 3             | 4             | 4             | 3             |
| 4             | 4             | 4             | 3             | 3             | 3             |
| 4             | 4             | 3             | 4             | 3             | 4             |
| 4             | 4             | 3             | 3             | 3             | 3             |
| 4             | 4             | 3             | 3             | 3             | 3             |
| 2             | 1             | 2             | 3             | 4             | 4             |
| 4             | 4             | 3             | 3             | 4             | 3             |
| 4             | 4             | 2             | 3             | 3             | 3             |
| 4             | 4             | 4             | 4             | 4             | 2             |
| 3             | 3             | 2             | 3             | 3             | 2             |
| 4             | 2             | 3             | 2             | 3             | 3             |
| 4             | 4             | 3             | 3             | 3             | 3             |
| 99            | 99            | 4             | 4             | 4             | 4             |
| 3             | 3             | 1             | 3             | 1             | 4             |
| 3             | 4             | 3             | 3             | 3             | 4             |
| 3             | 4             | 4             | 2             | 3             | 3             |
| 4             | 2             | 3             | 3             | 3             | 3             |
| 3             | 3             | 3             | 3             | 3             | 3             |
| 4             | 4             | 3             | 3             | 3             | 3             |
| 4             | 99            | 2             | 3             | 3             | 3             |
| 4             | 0             | 2             | 2             | 2             | 3             |
| 4             | 4             | 3             | 3             | 3             | 4             |
| 4             | 4             | 2             | 4             | 4             | 4             |
| 4             | 4             | 3             | 3             | 3             | 3             |
| 3             | 3             | 3             | 3             | 1             | 1             |

|    |    |    |   |    |   |
|----|----|----|---|----|---|
| 1  | 1  | 3  | 3 | 1  | 1 |
| 4  | 4  | 4  | 4 | 3  | 4 |
| 4  | 4  | 2  | 3 | 2  | 3 |
| 4  | 4  | 2  | 3 | 2  | 3 |
| 4  | 4  | 3  | 3 | 3  | 2 |
| 2  | 2  | 2  | 3 | 2  | 3 |
| 4  | 4  | 3  | 3 | 3  | 3 |
| 4  | 4  | 3  | 2 | 2  | 3 |
| 4  | 4  | 3  | 3 | 1  | 2 |
| 4  | 4  | 4  | 4 | 3  | 2 |
| 3  | 2  | 3  | 3 | 3  | 3 |
| 4  | 4  | 3  | 4 | 4  | 4 |
| 0  | 3  | 3  | 3 | 4  | 3 |
| 2  | 1  | 2  | 2 | 2  | 4 |
| 3  | 3  | 4  | 3 | 99 | 2 |
| 4  | 3  | 3  | 3 | 1  | 2 |
| 4  | 4  | 3  | 3 | 2  | 3 |
| 4  | 4  | 4  | 4 | 3  | 1 |
| 1  | 2  | 2  | 2 | 3  | 2 |
| 4  | 3  | 3  | 3 | 99 | 4 |
| 2  | 2  | 3  | 3 | 99 | 1 |
| 4  | 4  | 2  | 3 | 3  | 4 |
| 3  | 3  | 1  | 1 | 1  | 3 |
| 2  | 1  | 4  | 1 | 3  | 1 |
| 4  | 4  | 4  | 3 | 3  | 4 |
| 4  | 4  | 4  | 4 | 3  | 4 |
| 4  | 4  | 4  | 4 | 4  | 4 |
| 2  | 2  | 4  | 3 | 2  | 2 |
| 99 | 99 | 99 | 1 | 1  | 1 |
| 4  | 4  | 3  | 2 | 2  | 3 |
| 4  | 4  | 4  | 4 | 4  | 4 |
| 4  | 4  | 2  | 2 | 3  | 3 |
| 4  | 4  | 3  | 3 | 3  | 3 |
| 3  | 3  | 2  | 2 | 2  | 2 |
| 4  | 4  | 3  | 2 | 2  | 3 |
| 0  | 0  | 3  | 3 | 3  | 3 |
| 1  | 1  | 3  | 1 | 1  | 1 |
| 4  | 4  | 2  | 2 | 3  | 2 |
| 4  | 3  | 3  | 3 | 2  | 2 |
| 4  | 4  | 4  | 4 | 4  | 3 |
| 3  | 3  | 3  | 3 | 3  | 2 |
| 4  | 4  | 3  | 3 | 3  | 2 |
| 4  | 0  | 3  | 1 | 1  | 1 |
| 4  | 4  | 3  | 3 | 1  | 1 |
| 4  | 4  | 2  | 2 | 2  | 3 |
| 4  | 4  | 3  | 3 | 3  | 4 |
| 4  | 4  | 3  | 4 | 99 | 4 |
| 2  | 1  | 3  | 3 | 3  | 3 |

|    |    |    |    |    |    |
|----|----|----|----|----|----|
| 3  | 3  | 4  | 2  | 2  | 3  |
| 2  | 1  | 2  | 2  | 3  | 3  |
| 3  | 3  | 3  | 3  | 3  | 2  |
| 4  | 4  | 3  | 3  | 3  | 3  |
| 4  | 4  | 3  | 3  | 3  | 4  |
| 4  | 4  | 3  | 3  | 3  | 4  |
| 4  | 4  | 3  | 2  | 1  | 4  |
| 4  | 4  | 3  | 3  | 3  | 2  |
| 4  | 4  | 3  | 3  | 3  | 3  |
| 1  | 1  | 3  | 3  | 2  | 2  |
| 4  | 4  | 3  | 3  | 3  | 3  |
| 3  | 3  | 3  | 1  | 1  | 1  |
| 2  | 3  | 2  | 3  | 2  | 3  |
| 3  | 3  | 3  | 2  | 3  | 3  |
| 4  | 0  | 2  | 4  | 2  | 4  |
| 1  | 1  | 3  | 1  | 3  | 3  |
| 3  | 4  | 4  | 3  | 4  | 3  |
| 4  | 4  | 3  | 1  | 1  | 1  |
| 4  | 4  | 3  | 3  | 3  | 3  |
| 2  | 2  | 3  | 3  | 3  | 3  |
| 4  | 4  | 3  | 3  | 3  | 1  |
| 4  | 4  | 3  | 3  | 1  | 1  |
| 0  | 0  | 4  | 4  | 4  | 4  |
| 4  | 4  | 2  | 1  | 1  | 3  |
| 4  | 4  | 4  | 4  | 4  | 4  |
| 2  | 2  | 3  | 3  | 3  | 3  |
| 3  | 4  | 3  | 4  | 1  | 4  |
| 4  | 4  | 3  | 3  | 3  | 3  |
| 4  | 4  | 3  | 3  | 2  | 2  |
| 4  | 4  | 3  | 3  | 2  | 3  |
| 99 | 99 | 99 | 99 | 99 | 99 |
| 4  | 3  | 1  | 1  | 1  | 2  |
| 99 | 99 | 99 | 99 | 99 | 99 |
| 4  | 4  | 3  | 3  | 3  | 3  |
| 4  | 4  | 3  | 3  | 3  | 3  |
| 4  | 4  | 3  | 3  | 3  | 3  |
| 4  | 3  | 3  | 3  | 3  | 3  |
| 2  | 2  | 3  | 3  | 3  | 3  |
| 3  | 3  | 3  | 2  | 3  | 3  |
| 4  | 3  | 2  | 2  | 2  | 3  |
| 4  | 4  | 3  | 3  | 2  | 3  |
| 4  | 4  | 2  | 3  | 2  | 2  |
| 4  | 4  | 3  | 3  | 3  | 2  |
| 2  | 2  | 3  | 3  | 3  | 3  |
| 4  | 4  | 3  | 3  | 3  | 1  |
| 99 | 99 | 99 | 99 | 99 | 99 |
| 2  | 2  | 3  | 3  | 3  | 3  |
| 3  | 3  | 3  | 2  | 1  | 1  |



|    |    |   |   |   |   |
|----|----|---|---|---|---|
| 4  | 4  | 3 | 3 | 1 | 1 |
| 4  | 4  | 3 | 4 | 2 | 2 |
| 4  | 4  | 3 | 3 | 2 | 4 |
| 4  | 4  | 3 | 3 | 2 | 2 |
| 4  | 4  | 3 | 3 | 2 | 2 |
| 4  | 4  | 3 | 3 | 2 | 2 |
| 0  | 0  | 3 | 3 | 3 | 3 |
| 4  | 4  | 3 | 3 | 3 | 3 |
| 4  | 4  | 2 | 3 | 4 | 4 |
| 3  | 0  | 2 | 2 | 1 | 2 |
| 4  | 4  | 4 | 4 | 4 | 4 |
| 0  | 0  | 4 | 4 | 4 | 4 |
| 3  | 3  | 2 | 3 | 2 | 3 |
| 4  | 4  | 2 | 2 | 3 | 2 |
| 4  | 4  | 3 | 3 | 3 | 3 |
| 4  | 4  | 3 | 3 | 3 | 3 |
| 4  | 4  | 3 | 3 | 2 | 3 |
| 1  | 1  | 4 | 4 | 4 | 4 |
| 3  | 1  | 4 | 3 | 4 | 3 |
| 99 | 3  | 3 | 2 | 3 | 3 |
| 1  | 0  | 4 | 4 | 3 | 3 |
| 4  | 99 | 3 | 3 | 3 | 3 |
| 4  | 4  | 4 | 4 | 1 | 4 |
| 4  | 4  | 3 | 4 | 3 | 3 |
| 4  | 4  | 2 | 3 | 3 | 3 |
| 4  | 4  | 2 | 2 | 2 | 2 |
| 4  | 3  | 2 | 3 | 3 | 3 |
| 4  | 4  | 3 | 2 | 3 | 2 |
| 4  | 0  | 2 | 3 | 4 | 4 |
| 4  | 4  | 3 | 4 | 4 | 4 |
| 0  | 0  | 4 | 4 | 4 | 4 |
| 4  | 4  | 3 | 2 | 3 | 2 |
| 4  | 2  | 3 | 3 | 3 | 3 |
| 4  | 4  | 3 | 3 | 4 | 4 |
| 4  | 4  | 4 | 4 | 4 | 3 |
| 4  | 99 | 3 | 3 | 2 | 4 |
| 4  | 4  | 3 | 3 | 4 | 4 |
| 0  | 0  | 3 | 3 | 3 | 3 |
| 4  | 4  | 4 | 4 | 3 | 4 |
| 4  | 4  | 3 | 3 | 3 | 4 |
| 4  | 4  | 3 | 3 | 3 | 3 |
| 4  | 4  | 3 | 3 | 3 | 4 |
| 3  | 2  | 1 | 2 | 1 | 2 |
| 4  | 4  | 3 | 3 | 2 | 3 |
| 4  | 4  | 1 | 1 | 1 | 1 |
| 4  | 3  | 3 | 4 | 3 | 3 |
| 4  | 4  | 4 | 4 | 4 | 4 |

|    |    |    |   |    |    |
|----|----|----|---|----|----|
| 3  | 3  | 3  | 3 | 4  | 4  |
| 4  | 3  | 3  | 3 | 3  | 3  |
| 4  | 4  | 1  | 4 | 4  | 4  |
| 3  | 2  | 3  | 2 | 2  | 2  |
| 3  | 3  | 3  | 3 | 4  | 2  |
| 3  | 3  | 4  | 4 | 1  | 1  |
| 4  | 4  | 3  | 2 | 3  | 3  |
| 2  | 1  | 3  | 2 | 1  | 2  |
| 0  | 0  | 99 | 3 | 3  | 3  |
| 2  | 1  | 1  | 3 | 4  | 2  |
| 4  | 4  | 3  | 3 | 3  | 3  |
| 4  | 4  | 4  | 3 | 1  | 1  |
| 3  | 3  | 3  | 3 | 3  | 3  |
| 4  | 4  | 2  | 3 | 2  | 2  |
| 3  | 3  | 4  | 4 | 99 | 4  |
| 4  | 4  | 4  | 3 | 3  | 3  |
| 4  | 4  | 3  | 3 | 3  | 3  |
| 1  | 2  | 3  | 3 | 4  | 99 |
| 4  | 4  | 3  | 3 | 3  | 3  |
| 2  | 2  | 3  | 2 | 3  | 2  |
| 4  | 4  | 4  | 4 | 4  | 4  |
| 4  | 4  | 4  | 4 | 4  | 4  |
| 0  | 0  | 2  | 4 | 4  | 4  |
| 2  | 2  | 3  | 3 | 3  | 3  |
| 2  | 1  | 4  | 2 | 1  | 1  |
| 1  | 0  | 2  | 2 | 2  | 3  |
| 1  | 1  | 3  | 3 | 2  | 2  |
| 2  | 1  | 4  | 4 | 3  | 3  |
| 0  | 0  | 1  | 1 | 1  | 2  |
| 4  | 4  | 3  | 4 | 4  | 4  |
| 4  | 4  | 4  | 4 | 4  | 3  |
| 4  | 3  | 3  | 2 | 2  | 3  |
| 4  | 4  | 4  | 4 | 4  | 4  |
| 2  | 2  | 3  | 3 | 2  | 99 |
| 4  | 4  | 2  | 1 | 2  | 2  |
| 2  | 1  | 3  | 2 | 3  | 4  |
| 2  | 2  | 3  | 3 | 3  | 3  |
| 2  | 2  | 3  | 3 | 3  | 3  |
| 2  | 2  | 2  | 1 | 2  | 2  |
| 3  | 3  | 3  | 2 | 3  | 2  |
| 1  | 1  | 2  | 2 | 2  | 3  |
| 99 | 99 | 3  | 2 | 1  | 2  |
| 4  | 4  | 4  | 4 | 4  | 4  |
| 4  | 4  | 3  | 3 | 3  | 3  |
| 3  | 4  | 3  | 2 | 1  | 1  |
| 1  | 1  | 3  | 2 | 1  | 2  |
| 4  | 4  | 3  | 3 | 3  | 2  |
| 4  | 0  | 4  | 4 | 4  | 4  |

|    |    |    |    |    |    |
|----|----|----|----|----|----|
| 4  | 4  | 3  | 2  | 3  | 4  |
| 4  | 4  | 2  | 3  | 2  | 2  |
| 2  | 3  | 3  | 2  | 1  | 3  |
| 3  | 3  | 4  | 4  | 4  | 3  |
| 4  | 4  | 3  | 99 | 4  | 3  |
| 4  | 4  | 3  | 3  | 4  | 4  |
| 4  | 4  | 2  | 3  | 4  | 4  |
| 4  | 4  | 2  | 3  | 1  | 3  |
| 4  | 4  | 2  | 3  | 1  | 2  |
| 4  | 4  | 2  | 2  | 3  | 3  |
| 4  | 99 | 99 | 2  | 3  | 3  |
| 4  | 4  | 3  | 3  | 3  | 3  |
| 3  | 2  | 3  | 2  | 2  | 2  |
| 2  | 2  | 3  | 3  | 2  | 2  |
| 4  | 4  | 4  | 4  | 3  | 3  |
| 4  | 2  | 2  | 3  | 1  | 2  |
| 0  | 0  | 4  | 4  | 4  | 3  |
| 4  | 4  | 3  | 3  | 2  | 3  |
| 99 | 99 | 2  | 3  | 3  | 2  |
| 4  | 4  | 4  | 3  | 4  | 2  |
| 4  | 4  | 3  | 3  | 2  | 2  |
| 3  | 3  | 1  | 1  | 1  | 2  |
| 4  | 4  | 3  | 3  | 2  | 2  |
| 3  | 3  | 3  | 3  | 3  | 3  |
| 3  | 1  | 2  | 2  | 2  | 2  |
| 4  | 4  | 4  | 3  | 3  | 4  |
| 4  | 4  | 4  | 4  | 4  | 4  |
| 2  | 4  | 2  | 4  | 4  | 2  |
| 4  | 3  | 3  | 3  | 3  | 2  |
| 4  | 4  | 2  | 3  | 3  | 3  |
| 3  | 0  | 3  | 1  | 1  | 3  |
| 4  | 3  | 2  | 99 | 3  | 3  |
| 3  | 3  | 3  | 3  | 3  | 2  |
| 4  | 4  | 3  | 3  | 3  | 3  |
| 4  | 2  | 99 | 1  | 99 | 99 |
| 4  | 4  | 4  | 3  | 4  | 1  |
| 4  | 3  | 2  | 2  | 2  | 3  |
| 4  | 4  | 3  | 2  | 2  | 3  |
| 4  | 4  | 3  | 3  | 3  | 3  |
| 4  | 4  | 3  | 3  | 3  | 1  |
| 0  | 4  | 2  | 1  | 1  | 2  |
| 3  | 3  | 3  | 3  | 3  | 4  |
| 0  | 3  | 2  | 3  | 2  | 2  |
| 3  | 3  | 3  | 3  | 3  | 3  |
| 4  | 4  | 3  | 3  | 3  | 99 |
| 1  | 0  | 4  | 4  | 3  | 2  |
| 4  | 4  | 2  | 99 | 3  | 2  |
| 4  | 4  | 4  | 4  | 4  | 4  |

|    |    |    |    |    |    |
|----|----|----|----|----|----|
| 4  | 4  | 3  | 3  | 3  | 2  |
| 4  | 4  | 4  | 4  | 4  | 4  |
| 3  | 3  | 3  | 3  | 3  | 3  |
| 99 | 99 | 99 | 99 | 99 | 99 |
| 4  | 4  | 4  | 4  | 3  | 4  |
| 4  | 4  | 3  | 3  | 3  | 3  |
| 3  | 2  | 3  | 3  | 2  | 2  |
| 4  | 4  | 2  | 3  | 3  | 3  |
| 4  | 4  | 3  | 2  | 3  | 1  |
| 4  | 4  | 2  | 3  | 3  | 2  |
| 4  | 4  | 4  | 3  | 3  | 3  |
| 3  | 3  | 3  | 3  | 3  | 3  |
| 3  | 2  | 3  | 3  | 3  | 2  |
| 4  | 4  | 3  | 2  | 3  | 4  |
| 4  | 2  | 4  | 3  | 2  | 2  |
| 4  | 4  | 3  | 4  | 3  | 3  |
| 4  | 4  | 3  | 3  | 2  | 3  |
| 4  | 3  | 4  | 4  | 3  | 3  |
| 4  | 4  | 4  | 4  | 3  | 4  |
| 4  | 4  | 2  | 3  | 4  | 3  |
| 4  | 4  | 3  | 3  | 4  | 2  |
| 2  | 1  | 2  | 1  | 1  | 2  |
| 4  | 4  | 2  | 1  | 1  | 3  |
| 1  | 1  | 3  | 3  | 3  | 3  |
| 4  | 4  | 3  | 3  | 3  | 3  |
| 2  | 2  | 3  | 3  | 3  | 2  |
| 4  | 4  | 3  | 3  | 2  | 2  |
| 3  | 3  | 2  | 2  | 2  | 1  |
| 4  | 4  | 4  | 4  | 99 | 4  |
| 0  | 0  | 3  | 3  | 3  | 2  |
| 4  | 4  | 3  | 3  | 3  | 3  |
| 2  | 3  | 2  | 2  | 3  | 99 |
| 4  | 4  | 2  | 3  | 2  | 3  |
| 2  | 2  | 2  | 3  | 3  | 3  |
| 4  | 4  | 3  | 3  | 3  | 3  |
| 3  | 2  | 4  | 1  | 1  | 1  |
| 3  | 4  | 2  | 2  | 2  | 3  |
| 3  | 4  | 4  | 3  | 3  | 3  |
| 4  | 4  | 4  | 4  | 4  | 4  |
| 4  | 4  | 4  | 4  | 3  | 3  |
| 4  | 4  | 4  | 3  | 3  | 1  |
| 4  | 4  | 1  | 3  | 2  | 2  |
| 2  | 2  | 3  | 3  | 3  | 2  |
| 3  | 2  | 3  | 3  | 2  | 1  |
| 4  | 4  | 3  | 3  | 3  | 1  |
| 3  | 3  | 4  | 3  | 3  | 2  |
| 2  | 1  | 3  | 3  | 3  | 1  |
| 4  | 4  | 3  | 3  | 2  | 3  |

|    |    |    |    |    |    |
|----|----|----|----|----|----|
| 4  | 4  | 1  | 3  | 99 | 3  |
| 4  | 3  | 3  | 2  | 2  | 3  |
| 4  | 4  | 99 | 99 | 99 | 99 |
| 1  | 0  | 2  | 2  | 3  | 3  |
| 3  | 4  | 3  | 3  | 3  | 2  |
| 99 | 99 | 99 | 99 | 99 | 99 |
| 1  | 1  | 1  | 1  | 1  | 1  |
| 3  | 3  | 3  | 3  | 1  | 3  |
| 4  | 4  | 4  | 3  | 2  | 1  |
| 0  | 0  | 4  | 4  | 4  | 4  |
| 4  | 4  | 4  | 4  | 1  | 2  |
| 4  | 4  | 4  | 1  | 1  | 1  |
| 2  | 1  | 3  | 2  | 3  | 1  |
| 4  | 4  | 3  | 3  | 2  | 2  |
| 4  | 4  | 2  | 3  | 3  | 3  |
| 4  | 3  | 3  | 2  | 2  | 2  |
| 2  | 3  | 3  | 3  | 2  | 3  |
| 4  | 4  | 4  | 4  | 3  | 4  |
| 4  | 4  | 3  | 3  | 3  | 1  |
| 3  | 99 | 3  | 3  | 3  | 2  |
| 4  | 4  | 3  | 3  | 2  | 3  |
| 2  | 2  | 2  | 1  | 3  | 3  |
| 4  | 4  | 3  | 4  | 4  | 3  |
| 2  | 2  | 2  | 2  | 2  | 2  |
| 2  | 2  | 3  | 3  | 3  | 99 |
| 4  | 4  | 3  | 3  | 3  | 3  |
| 4  | 4  | 4  | 4  | 4  | 3  |
| 99 | 99 | 4  | 4  | 4  | 4  |
| 4  | 4  | 3  | 3  | 3  | 3  |
| 4  | 4  | 3  | 3  | 3  | 4  |
| 4  | 4  | 3  | 3  | 2  | 2  |
| 3  | 0  | 4  | 4  | 4  | 4  |
| 4  | 4  | 4  | 4  | 4  | 3  |
| 4  | 3  | 2  | 2  | 3  | 3  |
| 4  | 3  | 2  | 2  | 2  | 2  |
| 4  | 4  | 3  | 3  | 4  | 3  |
| 4  | 3  | 2  | 1  | 3  | 3  |
| 4  | 4  | 3  | 4  | 4  | 2  |
| 3  | 2  | 3  | 3  | 3  | 3  |
| 4  | 2  | 3  | 2  | 3  | 2  |
| 4  | 4  | 4  | 4  | 4  | 4  |
| 4  | 4  | 3  | 3  | 3  | 2  |
| 3  | 2  | 3  | 3  | 4  | 3  |
| 4  | 2  | 2  | 2  | 2  | 4  |
| 4  | 2  | 4  | 4  | 4  | 4  |
| 4  | 4  | 4  | 4  | 4  | 1  |
| 4  | 4  | 3  | 4  | 4  | 4  |
| 4  | 4  | 3  | 3  | 3  | 3  |

|    |    |    |    |    |    |
|----|----|----|----|----|----|
| 4  | 4  | 3  | 3  | 3  | 3  |
| 4  | 4  | 3  | 3  | 3  | 4  |
| 4  | 4  | 3  | 2  | 3  | 2  |
| 1  | 0  | 3  | 3  | 3  | 99 |
| 4  | 2  | 1  | 3  | 3  | 4  |
| 4  | 4  | 4  | 4  | 3  | 3  |
| 4  | 4  | 4  | 3  | 4  | 2  |
| 0  | 0  | 4  | 2  | 1  | 4  |
| 4  | 4  | 3  | 3  | 3  | 3  |
| 4  | 4  | 4  | 4  | 4  | 4  |
| 4  | 4  | 2  | 2  | 1  | 1  |
| 2  | 4  | 4  | 4  | 4  | 3  |
| 3  | 3  | 4  | 3  | 3  | 3  |
| 4  | 4  | 3  | 3  | 3  | 3  |
| 4  | 4  | 3  | 3  | 2  | 2  |
| 2  | 2  | 3  | 2  | 1  | 3  |
| 0  | 2  | 3  | 3  | 3  | 3  |
| 4  | 4  | 2  | 2  | 1  | 1  |
| 3  | 3  | 3  | 3  | 3  | 2  |
| 4  | 4  | 3  | 4  | 4  | 4  |
| 3  | 3  | 3  | 3  | 3  | 1  |
| 4  | 3  | 3  | 3  | 1  | 2  |
| 2  | 2  | 2  | 2  | 2  | 2  |
| 2  | 2  | 3  | 3  | 3  | 3  |
| 3  | 3  | 3  | 1  | 1  | 1  |
| 2  | 2  | 3  | 1  | 1  | 1  |
| 3  | 3  | 3  | 2  | 2  | 2  |
| 4  | 4  | 4  | 4  | 3  | 3  |
| 3  | 1  | 3  | 3  | 99 | 4  |
| 4  | 4  | 3  | 3  | 3  | 3  |
| 4  | 4  | 3  | 3  | 3  | 3  |
| 4  | 4  | 3  | 3  | 3  | 2  |
| 4  | 4  | 2  | 3  | 3  | 3  |
| 4  | 3  | 3  | 3  | 3  | 3  |
| 0  | 0  | 1  | 1  | 1  | 3  |
| 4  | 4  | 3  | 3  | 4  | 3  |
| 4  | 3  | 4  | 4  | 2  | 1  |
| 2  | 3  | 3  | 4  | 4  | 4  |
| 4  | 4  | 3  | 1  | 1  | 3  |
| 4  | 4  | 4  | 4  | 2  | 4  |
| 4  | 4  | 3  | 2  | 2  | 4  |
| 2  | 1  | 3  | 1  | 2  | 2  |
| 4  | 4  | 4  | 4  | 4  | 2  |
| 99 | 99 | 99 | 99 | 99 | 99 |
| 2  | 2  | 2  | 2  | 2  | 2  |
| 2  | 2  | 2  | 2  | 3  | 2  |
| 4  | 4  | 3  | 3  | 3  | 2  |
| 4  | 2  | 3  | 2  | 99 | 3  |

|    |    |    |    |    |    |
|----|----|----|----|----|----|
| 4  | 4  | 3  | 3  | 2  | 3  |
| 3  | 4  | 1  | 2  | 3  | 3  |
| 4  | 4  | 3  | 3  | 4  | 3  |
| 4  | 4  | 2  | 4  | 4  | 4  |
| 4  | 4  | 3  | 3  | 3  | 3  |
| 4  | 2  | 3  | 3  | 3  | 3  |
| 4  | 4  | 3  | 3  | 2  | 1  |
| 2  | 2  | 2  | 1  | 2  | 2  |
| 3  | 2  | 3  | 3  | 3  | 3  |
| 3  | 3  | 3  | 3  | 2  | 2  |
| 0  | 0  | 3  | 3  | 3  | 3  |
| 4  | 3  | 3  | 2  | 3  | 2  |
| 4  | 4  | 4  | 2  | 1  | 2  |
| 4  | 4  | 2  | 1  | 1  | 1  |
| 2  | 2  | 3  | 3  | 2  | 3  |
| 4  | 4  | 3  | 3  | 3  | 2  |
| 4  | 4  | 3  | 1  | 1  | 3  |
| 4  | 4  | 4  | 4  | 1  | 4  |
| 4  | 4  | 4  | 2  | 4  | 4  |
| 2  | 3  | 3  | 2  | 2  | 2  |
| 4  | 4  | 1  | 1  | 1  | 1  |
| 99 | 99 | 99 | 99 | 99 | 99 |
| 3  | 3  | 3  | 3  | 3  | 2  |
| 4  | 4  | 4  | 4  | 3  | 2  |
| 2  | 2  | 2  | 3  | 2  | 2  |
| 3  | 2  | 2  | 2  | 1  | 2  |
| 1  | 3  | 2  | 3  | 2  | 3  |
| 4  | 3  | 2  | 1  | 1  | 1  |
| 3  | 3  | 2  | 3  | 3  | 2  |
| 4  | 4  | 3  | 3  | 3  | 3  |
| 1  | 2  | 2  | 1  | 1  | 1  |
| 3  | 3  | 3  | 1  | 1  | 2  |
| 4  | 4  | 3  | 3  | 2  | 2  |
| 4  | 4  | 4  | 2  | 1  | 1  |
| 99 | 99 | 4  | 4  | 1  | 3  |
| 4  | 4  | 4  | 4  | 4  | 2  |
| 2  | 2  | 2  | 2  | 2  | 2  |
| 2  | 2  | 3  | 3  | 3  | 1  |
| 4  | 4  | 3  | 3  | 3  | 3  |
| 3  | 3  | 3  | 3  | 3  | 2  |
| 0  | 1  | 3  | 2  | 3  | 3  |
| 99 | 99 | 99 | 99 | 99 | 99 |
| 4  | 3  | 3  | 2  | 3  | 2  |
| 4  | 4  | 3  | 3  | 3  | 2  |
| 4  | 4  | 4  | 4  | 4  | 1  |
| 3  | 1  | 4  | 3  | 1  | 1  |
| 3  | 3  | 3  | 3  | 2  | 2  |
| 4  | 0  | 4  | 4  | 4  | 3  |

|    |    |    |    |    |    |
|----|----|----|----|----|----|
| 4  | 4  | 3  | 2  | 3  | 1  |
| 4  | 2  | 3  | 3  | 3  | 2  |
| 4  | 4  | 3  | 3  | 3  | 2  |
| 3  | 3  | 1  | 3  | 3  | 99 |
| 0  | 0  | 4  | 3  | 1  | 1  |
| 4  | 3  | 3  | 3  | 2  | 3  |
| 4  | 99 | 99 | 99 | 3  | 4  |
| 3  | 2  | 2  | 1  | 1  | 2  |
| 0  | 2  | 4  | 4  | 3  | 1  |
| 4  | 4  | 4  | 4  | 1  | 99 |
| 4  | 4  | 3  | 3  | 1  | 3  |
| 4  | 4  | 4  | 4  | 1  | 1  |
| 4  | 4  | 3  | 3  | 2  | 3  |
| 4  | 4  | 4  | 3  | 3  | 3  |
| 0  | 0  | 1  | 1  | 1  | 1  |
| 4  | 4  | 4  | 4  | 4  | 4  |
| 4  | 4  | 3  | 2  | 3  | 1  |
| 4  | 4  | 2  | 3  | 3  | 3  |
| 4  | 4  | 3  | 4  | 4  | 3  |
| 4  | 2  | 4  | 3  | 2  | 2  |
| 4  | 4  | 3  | 3  | 1  | 2  |
| 2  | 1  | 3  | 2  | 1  | 2  |
| 4  | 4  | 3  | 4  | 4  | 4  |
| 2  | 2  | 4  | 3  | 3  | 1  |
| 99 | 99 | 99 | 99 | 99 | 99 |
| 3  | 2  | 3  | 99 | 2  | 2  |
| 3  | 3  | 2  | 3  | 2  | 3  |
| 4  | 4  | 2  | 1  | 2  | 1  |
| 4  | 4  | 3  | 3  | 4  | 4  |
| 4  | 2  | 3  | 1  | 3  | 1  |
| 4  | 4  | 3  | 3  | 3  | 2  |
| 4  | 4  | 3  | 3  | 3  | 3  |
| 2  | 2  | 3  | 3  | 2  | 2  |
| 4  | 2  | 3  | 2  | 1  | 1  |
| 2  | 4  | 4  | 4  | 99 | 1  |
| 4  | 4  | 3  | 3  | 3  | 4  |
| 1  | 2  | 3  | 2  | 3  | 3  |
| 2  | 4  | 3  | 3  | 4  | 3  |
| 4  | 2  | 1  | 3  | 2  | 4  |
| 4  | 4  | 3  | 2  | 1  | 1  |
| 3  | 2  | 3  | 3  | 2  | 3  |
| 3  | 2  | 2  | 3  | 3  | 2  |
| 4  | 4  | 3  | 3  | 1  | 2  |
| 4  | 4  | 3  | 3  | 3  | 3  |
| 4  | 4  | 2  | 2  | 3  | 2  |
| 4  | 4  | 3  | 3  | 3  | 4  |
| 4  | 4  | 2  | 2  | 2  | 3  |
| 4  | 4  | 3  | 3  | 3  | 3  |



|    |    |    |    |    |    |
|----|----|----|----|----|----|
| 4  | 4  | 3  | 3  | 3  | 1  |
| 2  | 2  | 4  | 3  | 3  | 4  |
| 3  | 4  | 99 | 3  | 99 | 3  |
| 4  | 4  | 3  | 3  | 3  | 3  |
| 1  | 2  | 3  | 3  | 3  | 3  |
| 4  | 4  | 3  | 3  | 3  | 3  |
| 4  | 4  | 3  | 3  | 3  | 3  |
| 2  | 2  | 1  | 1  | 1  | 2  |
| 4  | 4  | 3  | 3  | 3  | 3  |
| 4  | 3  | 2  | 3  | 3  | 3  |
| 1  | 3  | 3  | 3  | 2  | 2  |
| 4  | 4  | 3  | 3  | 3  | 4  |
| 3  | 3  | 4  | 4  | 4  | 3  |
| 3  | 4  | 2  | 2  | 1  | 3  |
| 99 | 99 | 99 | 99 | 99 | 99 |
| 3  | 3  | 3  | 3  | 3  | 3  |
| 3  | 3  | 3  | 3  | 3  | 3  |
| 4  | 4  | 3  | 4  | 99 | 3  |
| 4  | 4  | 3  | 3  | 3  | 3  |
| 4  | 4  | 3  | 4  | 4  | 3  |
| 4  | 4  | 4  | 4  | 3  | 3  |
| 4  | 4  | 3  | 3  | 4  | 4  |
| 0  | 0  | 1  | 1  | 1  | 4  |
| 0  | 3  | 4  | 3  | 2  | 1  |
| 2  | 1  | 2  | 2  | 1  | 2  |
| 99 | 99 | 1  | 1  | 2  | 3  |
| 2  | 1  | 3  | 2  | 3  | 3  |
| 4  | 4  | 3  | 3  | 2  | 2  |
| 4  | 4  | 3  | 3  | 3  | 3  |
| 4  | 4  | 3  | 3  | 3  | 2  |
| 4  | 4  | 3  | 3  | 3  | 2  |
| 4  | 4  | 4  | 3  | 1  | 2  |
| 2  | 3  | 3  | 2  | 1  | 2  |
| 2  | 3  | 3  | 3  | 3  | 2  |
| 4  | 4  | 3  | 3  | 2  | 2  |
| 4  | 4  | 4  | 1  | 1  | 1  |
| 3  | 2  | 3  | 3  | 2  | 99 |
| 3  | 3  | 2  | 2  | 2  | 3  |
| 3  | 3  | 3  | 3  | 1  | 1  |
| 4  | 4  | 3  | 4  | 4  | 4  |
| 4  | 4  | 3  | 3  | 1  | 1  |
| 3  | 3  | 3  | 3  | 3  | 2  |
| 3  | 3  | 3  | 1  | 2  | 2  |
| 4  | 3  | 3  | 3  | 2  | 2  |
| 3  | 3  | 3  | 3  | 99 | 99 |
| 0  | 0  | 4  | 4  | 4  | 4  |
| 3  | 3  | 99 | 3  | 3  | 2  |
| 4  | 4  | 3  | 2  | 1  | 3  |

|    |    |    |    |    |    |
|----|----|----|----|----|----|
| 4  | 4  | 3  | 2  | 1  | 2  |
| 4  | 4  | 1  | 1  | 1  | 3  |
| 4  | 4  | 3  | 1  | 1  | 2  |
| 4  | 4  | 3  | 3  | 2  | 2  |
| 4  | 4  | 3  | 3  | 3  | 2  |
| 4  | 4  | 3  | 3  | 4  | 4  |
| 0  | 0  | 4  | 4  | 4  | 4  |
| 4  | 4  | 3  | 3  | 2  | 3  |
| 4  | 4  | 3  | 1  | 3  | 2  |
| 4  | 4  | 1  | 2  | 3  | 2  |
| 4  | 3  | 4  | 3  | 1  | 2  |
| 3  | 4  | 2  | 2  | 3  | 3  |
| 2  | 2  | 4  | 3  | 2  | 3  |
| 4  | 4  | 3  | 4  | 4  | 4  |
| 4  | 4  | 3  | 2  | 3  | 3  |
| 0  | 0  | 4  | 3  | 3  | 3  |
| 4  | 4  | 3  | 3  | 3  | 3  |
| 4  | 4  | 3  | 4  | 4  | 3  |
| 4  | 4  | 3  | 3  | 2  | 3  |
| 4  | 4  | 4  | 4  | 4  | 4  |
| 4  | 4  | 3  | 3  | 3  | 3  |
| 4  | 4  | 3  | 4  | 4  | 4  |
| 0  | 99 | 4  | 3  | 4  | 4  |
| 3  | 3  | 2  | 3  | 3  | 3  |
| 4  | 4  | 3  | 3  | 3  | 3  |
| 4  | 4  | 4  | 4  | 4  | 4  |
| 4  | 4  | 99 | 99 | 99 | 99 |
| 4  | 4  | 3  | 3  | 3  | 3  |
| 4  | 4  | 3  | 1  | 1  | 1  |
| 4  | 4  | 4  | 4  | 4  | 4  |
| 99 | 99 | 99 | 99 | 99 | 99 |
| 4  | 4  | 2  | 3  | 3  | 4  |
| 4  | 4  | 3  | 4  | 3  | 3  |
| 4  | 4  | 3  | 3  | 4  | 4  |
| 4  | 4  | 3  | 3  | 3  | 4  |
| 3  | 3  | 3  | 2  | 3  | 99 |
| 4  | 4  | 2  | 3  | 4  | 3  |
| 4  | 3  | 4  | 4  | 4  | 4  |
| 0  | 0  | 4  | 4  | 4  | 4  |
| 4  | 4  | 3  | 4  | 4  | 4  |
| 4  | 4  | 3  | 3  | 4  | 4  |
| 4  | 3  | 4  | 4  | 3  | 4  |
| 4  | 4  | 3  | 3  | 3  | 3  |
| 3  | 3  | 4  | 4  | 4  | 4  |
| 4  | 4  | 3  | 4  | 4  | 4  |
| 4  | 4  | 4  | 4  | 4  | 4  |
| 4  | 4  | 4  | 4  | 4  | 4  |
| 4  | 4  | 4  | 4  | 4  | 4  |

|    |    |    |    |   |    |
|----|----|----|----|---|----|
| 4  | 4  | 3  | 4  | 4 | 4  |
| 4  | 4  | 3  | 3  | 3 | 3  |
| 4  | 4  | 4  | 4  | 4 | 4  |
| 4  | 2  | 3  | 3  | 3 | 3  |
| 2  | 99 | 3  | 3  | 3 | 3  |
| 4  | 4  | 3  | 4  | 4 | 4  |
| 99 | 99 | 3  | 4  | 4 | 4  |
| 4  | 4  | 3  | 3  | 3 | 3  |
| 4  | 4  | 4  | 3  | 4 | 4  |
| 4  | 4  | 3  | 4  | 3 | 4  |
| 4  | 4  | 2  | 3  | 3 | 3  |
| 4  | 4  | 3  | 3  | 3 | 3  |
| 4  | 4  | 2  | 3  | 4 | 4  |
| 3  | 4  | 3  | 3  | 2 | 3  |
| 4  | 4  | 3  | 3  | 3 | 3  |
| 4  | 4  | 2  | 2  | 3 | 1  |
| 4  | 4  | 1  | 1  | 1 | 4  |
| 4  | 4  | 3  | 3  | 2 | 2  |
| 4  | 4  | 3  | 3  | 3 | 3  |
| 4  | 4  | 4  | 2  | 2 | 2  |
| 2  | 2  | 1  | 1  | 1 | 3  |
| 4  | 4  | 4  | 4  | 3 | 3  |
| 4  | 4  | 3  | 2  | 3 | 3  |
| 4  | 0  | 4  | 4  | 3 | 4  |
| 4  | 4  | 2  | 1  | 3 | 4  |
| 0  | 0  | 3  | 4  | 4 | 3  |
| 4  | 4  | 1  | 1  | 1 | 1  |
| 4  | 4  | 1  | 2  | 3 | 3  |
| 99 | 99 | 3  | 4  | 4 | 4  |
| 4  | 4  | 3  | 3  | 2 | 3  |
| 2  | 2  | 4  | 4  | 3 | 3  |
| 3  | 3  | 3  | 3  | 3 | 3  |
| 4  | 4  | 4  | 2  | 2 | 2  |
| 4  | 4  | 3  | 3  | 3 | 3  |
| 4  | 4  | 3  | 2  | 2 | 99 |
| 4  | 4  | 3  | 3  | 1 | 1  |
| 0  | 0  | 2  | 2  | 2 | 2  |
| 4  | 4  | 4  | 4  | 4 | 4  |
| 4  | 4  | 4  | 3  | 4 | 4  |
| 4  | 4  | 3  | 4  | 3 | 4  |
| 0  | 1  | 99 | 99 | 3 | 1  |
| 4  | 4  | 3  | 3  | 3 | 3  |
| 3  | 4  | 3  | 2  | 1 | 2  |
| 4  | 4  | 2  | 4  | 4 | 3  |
| 4  | 4  | 4  | 4  | 4 | 4  |
| 99 | 0  | 3  | 3  | 3 | 2  |
| 4  | 4  | 2  | 3  | 3 | 3  |
| 2  | 2  | 3  | 3  | 3 | 3  |

|    |    |    |    |    |    |
|----|----|----|----|----|----|
| 4  | 4  | 3  | 4  | 3  | 3  |
| 4  | 4  | 4  | 4  | 4  | 4  |
| 3  | 2  | 3  | 2  | 3  | 2  |
| 4  | 4  | 3  | 3  | 3  | 3  |
| 4  | 4  | 4  | 3  | 1  | 1  |
| 4  | 4  | 3  | 2  | 3  | 1  |
| 4  | 4  | 3  | 4  | 3  | 4  |
| 2  | 0  | 4  | 3  | 3  | 2  |
| 4  | 4  | 3  | 3  | 3  | 2  |
| 3  | 3  | 3  | 3  | 2  | 2  |
| 4  | 4  | 3  | 1  | 1  | 1  |
| 2  | 3  | 4  | 3  | 3  | 2  |
| 4  | 4  | 3  | 2  | 4  | 3  |
| 3  | 2  | 3  | 3  | 3  | 3  |
| 2  | 2  | 3  | 3  | 3  | 3  |
| 99 | 99 | 99 | 99 | 99 | 99 |
| 4  | 4  | 3  | 3  | 3  | 3  |
| 1  | 1  | 2  | 2  | 2  | 1  |
| 3  | 2  | 2  | 3  | 2  | 1  |
| 4  | 0  | 3  | 3  | 3  | 3  |
| 3  | 3  | 1  | 1  | 1  | 3  |
| 4  | 4  | 3  | 3  | 3  | 3  |
| 4  | 4  | 3  | 3  | 3  | 3  |
| 3  | 0  | 2  | 3  | 3  | 3  |
| 4  | 4  | 3  | 3  | 3  | 3  |
| 0  | 1  | 4  | 3  | 99 | 4  |
| 4  | 0  | 3  | 2  | 2  | 3  |
| 4  | 2  | 2  | 2  | 2  | 3  |
| 4  | 4  | 3  | 3  | 3  | 4  |
| 4  | 4  | 2  | 4  | 4  | 4  |
| 3  | 3  | 4  | 3  | 3  | 3  |
| 2  | 2  | 3  | 2  | 2  | 3  |
| 99 | 99 | 2  | 2  | 3  | 3  |
| 99 | 99 | 99 | 99 | 99 | 99 |
| 4  | 4  | 3  | 3  | 3  | 3  |
| 4  | 4  | 3  | 4  | 3  | 4  |
| 4  | 3  | 2  | 3  | 3  | 3  |
| 2  | 2  | 2  | 2  | 2  | 2  |
| 4  | 4  | 3  | 4  | 4  | 4  |
| 1  | 1  | 3  | 2  | 2  | 2  |
| 4  | 4  | 3  | 3  | 3  | 4  |
| 4  | 2  | 3  | 4  | 3  | 2  |
| 3  | 4  | 2  | 1  | 2  | 2  |
| 4  | 4  | 4  | 4  | 4  | 4  |
| 99 | 99 | 99 | 3  | 3  | 3  |
| 1  | 1  | 2  | 4  | 4  | 4  |
| 4  | 4  | 4  | 4  | 4  | 4  |
| 3  | 4  | 2  | 2  | 3  | 4  |

|   |    |    |   |    |    |
|---|----|----|---|----|----|
| 2 | 1  | 3  | 3 | 3  | 3  |
| 2 | 1  | 3  | 4 | 4  | 4  |
| 3 | 3  | 2  | 3 | 2  | 3  |
| 4 | 4  | 4  | 4 | 4  | 4  |
| 1 | 2  | 3  | 4 | 4  | 3  |
| 4 | 4  | 3  | 4 | 4  | 4  |
| 4 | 4  | 3  | 4 | 4  | 4  |
| 4 | 3  | 3  | 2 | 3  | 3  |
| 4 | 4  | 3  | 3 | 3  | 3  |
| 0 | 4  | 4  | 4 | 4  | 4  |
| 4 | 4  | 3  | 3 | 4  | 3  |
| 3 | 2  | 3  | 3 | 2  | 3  |
| 4 | 3  | 2  | 3 | 3  | 3  |
| 4 | 4  | 2  | 1 | 2  | 2  |
| 3 | 3  | 3  | 2 | 2  | 3  |
| 4 | 4  | 4  | 2 | 4  | 3  |
| 4 | 4  | 3  | 3 | 3  | 4  |
| 4 | 99 | 3  | 3 | 3  | 3  |
| 4 | 4  | 3  | 3 | 2  | 3  |
| 4 | 4  | 99 | 4 | 3  | 4  |
| 2 | 1  | 3  | 2 | 4  | 3  |
| 3 | 3  | 3  | 3 | 3  | 3  |
| 4 | 4  | 1  | 1 | 1  | 1  |
| 4 | 4  | 4  | 4 | 4  | 4  |
| 3 | 3  | 3  | 3 | 3  | 3  |
| 3 | 4  | 2  | 2 | 3  | 3  |
| 3 | 3  | 2  | 3 | 3  | 3  |
| 4 | 4  | 4  | 4 | 3  | 2  |
| 2 | 3  | 3  | 3 | 2  | 3  |
| 1 | 2  | 2  | 3 | 1  | 1  |
| 4 | 4  | 3  | 2 | 2  | 3  |
| 3 | 3  | 3  | 3 | 3  | 3  |
| 4 | 4  | 99 | 3 | 99 | 99 |
| 4 | 4  | 4  | 4 | 4  | 4  |
| 4 | 4  | 4  | 4 | 4  | 4  |
| 4 | 4  | 4  | 4 | 3  | 1  |
| 4 | 4  | 3  | 4 | 4  | 4  |
| 2 | 2  | 3  | 1 | 1  | 1  |
| 0 | 0  | 3  | 3 | 3  | 2  |
| 4 | 4  | 2  | 2 | 2  | 3  |
| 2 | 2  | 3  | 3 | 99 | 2  |
| 4 | 4  | 3  | 3 | 3  | 3  |
| 4 | 4  | 3  | 3 | 4  | 4  |
| 4 | 4  | 3  | 2 | 3  | 3  |
| 4 | 4  | 4  | 4 | 3  | 2  |
| 2 | 2  | 4  | 3 | 99 | 99 |
| 4 | 3  | 3  | 2 | 2  | 3  |
| 1 | 1  | 3  | 2 | 3  | 2  |

|    |    |    |    |    |    |
|----|----|----|----|----|----|
| 4  | 4  | 3  | 3  | 2  | 2  |
| 4  | 3  | 3  | 3  | 2  | 2  |
| 4  | 4  | 3  | 99 | 2  | 99 |
| 4  | 4  | 3  | 2  | 2  | 3  |
| 4  | 4  | 2  | 2  | 2  | 1  |
| 2  | 1  | 3  | 3  | 2  | 3  |
| 4  | 4  | 3  | 3  | 3  | 1  |
| 4  | 4  | 3  | 4  | 3  | 1  |
| 4  | 4  | 3  | 4  | 2  | 3  |
| 3  | 3  | 3  | 3  | 2  | 1  |
| 4  | 4  | 3  | 1  | 2  | 2  |
| 0  | 0  | 4  | 4  | 4  | 4  |
| 99 | 99 | 99 | 99 | 99 | 99 |
| 4  | 4  | 4  | 4  | 4  | 4  |
| 4  | 4  | 4  | 4  | 4  | 4  |
| 4  | 4  | 3  | 3  | 3  | 3  |
| 1  | 2  | 2  | 2  | 2  | 2  |
| 3  | 4  | 3  | 3  | 2  | 3  |
| 4  | 4  | 3  | 3  | 2  | 3  |
| 3  | 3  | 3  | 2  | 2  | 1  |
| 4  | 4  | 2  | 2  | 2  | 2  |
| 4  | 4  | 3  | 2  | 2  | 3  |
| 4  | 4  | 2  | 2  | 2  | 1  |
| 4  | 4  | 3  | 3  | 2  | 3  |
| 3  | 2  | 3  | 3  | 4  | 2  |
| 4  | 3  | 3  | 2  | 1  | 2  |
| 0  | 0  | 4  | 4  | 4  | 4  |
| 4  | 4  | 2  | 3  | 3  | 3  |
| 3  | 4  | 4  | 4  | 4  | 3  |
| 0  | 0  | 2  | 3  | 3  | 3  |
| 4  | 4  | 1  | 4  | 4  | 4  |
| 4  | 4  | 3  | 3  | 3  | 2  |
| 4  | 4  | 3  | 3  | 3  | 3  |
| 4  | 4  | 3  | 3  | 2  | 1  |
| 4  | 4  | 4  | 4  | 4  | 1  |
| 3  | 3  | 3  | 3  | 3  | 3  |
| 3  | 4  | 2  | 3  | 2  | 2  |
| 4  | 4  | 2  | 2  | 1  | 2  |
| 4  | 4  | 2  | 3  | 1  | 4  |
| 0  | 4  | 3  | 4  | 3  | 4  |
| 3  | 4  | 2  | 2  | 3  | 2  |
| 4  | 4  | 3  | 3  | 3  | 3  |
| 4  | 4  | 3  | 4  | 3  | 99 |
| 4  | 4  | 4  | 4  | 4  | 4  |
| 3  | 3  | 3  | 2  | 1  | 2  |
| 4  | 4  | 3  | 4  | 3  | 4  |
| 4  | 4  | 3  | 3  | 4  | 3  |
| 4  | 3  | 3  | 2  | 3  | 3  |

|   |   |    |    |    |   |
|---|---|----|----|----|---|
| 4 | 3 | 3  | 3  | 2  | 3 |
| 4 | 2 | 2  | 3  | 3  | 3 |
| 4 | 4 | 2  | 3  | 3  | 3 |
| 4 | 4 | 3  | 4  | 3  | 4 |
| 4 | 4 | 3  | 3  | 3  | 2 |
| 1 | 1 | 3  | 2  | 2  | 3 |
| 2 | 2 | 99 | 3  | 2  | 2 |
| 4 | 4 | 4  | 4  | 4  | 4 |
| 4 | 4 | 3  | 4  | 4  | 4 |
| 4 | 4 | 3  | 3  | 2  | 3 |
| 4 | 4 | 3  | 3  | 3  | 3 |
| 3 | 3 | 3  | 3  | 3  | 3 |
| 3 | 3 | 3  | 99 | 3  | 2 |
| 4 | 4 | 3  | 3  | 3  | 3 |
| 4 | 4 | 3  | 3  | 3  | 3 |
| 4 | 2 | 3  | 2  | 2  | 1 |
| 0 | 0 | 3  | 3  | 3  | 3 |
| 4 | 4 | 3  | 3  | 2  | 3 |
| 3 | 3 | 3  | 2  | 99 | 1 |
| 3 | 2 | 4  | 4  | 2  | 4 |
| 3 | 1 | 3  | 3  | 4  | 2 |
| 4 | 4 | 4  | 4  | 4  | 1 |
| 2 | 2 | 2  | 3  | 2  | 2 |
| 3 | 3 | 3  | 2  | 3  | 2 |
| 2 | 2 | 2  | 1  | 1  | 3 |
| 4 | 4 | 4  | 2  | 1  | 1 |
| 3 | 3 | 3  | 3  | 3  | 3 |
| 4 | 4 | 3  | 3  | 3  | 3 |
| 2 | 3 | 3  | 2  | 2  | 3 |
| 4 | 4 | 4  | 3  | 3  | 3 |
| 4 | 4 | 1  | 1  | 1  | 1 |
| 4 | 4 | 3  | 2  | 2  | 2 |
| 4 | 4 | 99 | 3  | 2  | 3 |
| 2 | 2 | 3  | 3  | 3  | 2 |
| 3 | 4 | 3  | 2  | 2  | 2 |
| 4 | 4 | 3  | 2  | 2  | 2 |
| 4 | 4 | 1  | 1  | 1  | 4 |
| 2 | 2 | 1  | 1  | 3  | 1 |
| 3 | 3 | 2  | 2  | 1  | 1 |
| 4 | 4 | 3  | 3  | 4  | 3 |
| 4 | 4 | 4  | 3  | 3  | 2 |
| 3 | 4 | 3  | 3  | 3  | 1 |
| 4 | 4 | 3  | 3  | 3  | 3 |
| 4 | 4 | 3  | 3  | 2  | 2 |
| 4 | 3 | 4  | 3  | 2  | 3 |
| 4 | 4 | 3  | 3  | 3  | 3 |
| 1 | 2 | 4  | 1  | 1  | 2 |
| 4 | 4 | 4  | 4  | 4  | 3 |

|   |    |    |   |    |    |
|---|----|----|---|----|----|
| 4 | 3  | 4  | 3 | 4  | 2  |
| 0 | 0  | 1  | 1 | 1  | 1  |
| 4 | 4  | 2  | 3 | 3  | 3  |
| 2 | 2  | 3  | 3 | 1  | 2  |
| 3 | 3  | 2  | 2 | 1  | 1  |
| 4 | 4  | 4  | 3 | 1  | 1  |
| 4 | 3  | 3  | 3 | 2  | 2  |
| 2 | 1  | 3  | 2 | 1  | 2  |
| 4 | 4  | 4  | 4 | 4  | 3  |
| 4 | 99 | 3  | 1 | 3  | 4  |
| 3 | 3  | 3  | 3 | 2  | 2  |
| 2 | 2  | 2  | 2 | 1  | 3  |
| 4 | 4  | 2  | 3 | 2  | 3  |
| 4 | 4  | 3  | 3 | 3  | 2  |
| 4 | 4  | 3  | 3 | 3  | 3  |
| 4 | 4  | 3  | 3 | 2  | 2  |
| 3 | 3  | 2  | 2 | 2  | 2  |
| 0 | 0  | 4  | 4 | 4  | 1  |
| 4 | 1  | 3  | 3 | 2  | 1  |
| 4 | 4  | 3  | 3 | 3  | 3  |
| 2 | 2  | 3  | 3 | 2  | 2  |
| 4 | 4  | 3  | 2 | 2  | 3  |
| 4 | 2  | 3  | 3 | 3  | 3  |
| 0 | 0  | 2  | 3 | 3  | 3  |
| 3 | 4  | 99 | 4 | 1  | 2  |
| 4 | 4  | 4  | 4 | 4  | 4  |
| 0 | 0  | 4  | 1 | 4  | 4  |
| 4 | 4  | 2  | 1 | 1  | 3  |
| 3 | 3  | 3  | 3 | 2  | 1  |
| 4 | 4  | 4  | 2 | 3  | 4  |
| 4 | 3  | 3  | 3 | 4  | 2  |
| 4 | 3  | 3  | 3 | 3  | 2  |
| 4 | 4  | 3  | 2 | 2  | 3  |
| 4 | 4  | 3  | 3 | 3  | 3  |
| 4 | 4  | 2  | 1 | 1  | 1  |
| 3 | 2  | 3  | 3 | 3  | 1  |
| 0 | 0  | 3  | 3 | 3  | 3  |
| 4 | 4  | 2  | 3 | 2  | 2  |
| 4 | 3  | 4  | 3 | 4  | 1  |
| 4 | 4  | 3  | 3 | 3  | 3  |
| 4 | 4  | 3  | 3 | 2  | 2  |
| 2 | 2  | 99 | 2 | 99 | 99 |
| 3 | 4  | 4  | 3 | 2  | 1  |
| 4 | 4  | 3  | 3 | 2  | 1  |
| 4 | 4  | 4  | 4 | 3  | 3  |
| 3 | 2  | 2  | 2 | 3  | 2  |
| 4 | 4  | 3  | 3 | 3  | 3  |
| 4 | 4  | 2  | 3 | 3  | 99 |



|    |    |    |    |    |    |
|----|----|----|----|----|----|
| 4  | 4  | 3  | 3  | 3  | 3  |
| 1  | 0  | 3  | 3  | 3  | 3  |
| 3  | 4  | 3  | 3  | 2  | 3  |
| 3  | 99 | 3  | 2  | 3  | 2  |
| 99 | 99 | 99 | 99 | 99 | 99 |
| 3  | 3  | 2  | 2  | 1  | 2  |
| 4  | 4  | 3  | 3  | 3  | 3  |
| 4  | 4  | 3  | 3  | 3  | 3  |
| 4  | 4  | 3  | 3  | 4  | 3  |
| 4  | 4  | 3  | 4  | 3  | 4  |
| 4  | 4  | 3  | 2  | 2  | 3  |
| 4  | 4  | 3  | 4  | 4  | 3  |
| 4  | 4  | 3  | 3  | 3  | 2  |
| 4  | 4  | 3  | 3  | 3  | 3  |
| 1  | 2  | 2  | 3  | 3  | 2  |
| 4  | 4  | 4  | 4  | 4  | 4  |
| 4  | 3  | 3  | 4  | 4  | 4  |
| 1  | 1  | 1  | 2  | 1  | 3  |
| 3  | 4  | 2  | 3  | 3  | 3  |
| 4  | 4  | 4  | 3  | 3  | 4  |
| 2  | 2  | 2  | 2  | 3  | 2  |
| 4  | 4  | 3  | 3  | 3  | 3  |
| 4  | 4  | 2  | 3  | 3  | 2  |
| 4  | 4  | 3  | 4  | 4  | 3  |
| 4  | 4  | 4  | 1  | 3  | 99 |
| 4  | 4  | 3  | 4  | 3  | 3  |
| 4  | 4  | 4  | 3  | 4  | 2  |
| 4  | 4  | 4  | 4  | 3  | 4  |
| 2  | 2  | 3  | 3  | 1  | 1  |
| 4  | 2  | 3  | 3  | 3  | 3  |
| 4  | 4  | 3  | 2  | 3  | 4  |
| 99 | 4  | 3  | 2  | 3  | 3  |
| 4  | 4  | 3  | 4  | 4  | 4  |
| 3  | 3  | 3  | 2  | 2  | 3  |
| 1  | 1  | 3  | 2  | 1  | 2  |
| 1  | 3  | 4  | 2  | 3  | 2  |
| 2  | 2  | 3  | 3  | 2  | 2  |
| 4  | 3  | 3  | 2  | 1  | 4  |
| 2  | 3  | 3  | 3  | 3  | 3  |
| 0  | 0  | 3  | 3  | 3  | 3  |
| 4  | 4  | 3  | 3  | 4  | 3  |
| 4  | 4  | 3  | 4  | 4  | 3  |
| 4  | 4  | 3  | 4  | 4  | 4  |
| 4  | 4  | 3  | 3  | 4  | 4  |
| 4  | 4  | 3  | 3  | 3  | 4  |
| 4  | 4  | 2  | 2  | 2  | 3  |
| 4  | 4  | 4  | 4  | 3  | 3  |
| 3  | 3  | 2  | 3  | 4  | 4  |

|    |    |    |    |   |    |
|----|----|----|----|---|----|
| 4  | 4  | 4  | 4  | 4 | 4  |
| 4  | 4  | 3  | 2  | 3 | 3  |
| 4  | 4  | 4  | 4  | 4 | 4  |
| 4  | 4  | 3  | 3  | 2 | 3  |
| 4  | 4  | 3  | 3  | 3 | 3  |
| 4  | 4  | 3  | 3  | 4 | 3  |
| 4  | 4  | 3  | 2  | 3 | 2  |
| 4  | 4  | 3  | 3  | 3 | 99 |
| 1  | 0  | 4  | 3  | 3 | 3  |
| 4  | 4  | 3  | 3  | 3 | 3  |
| 4  | 4  | 3  | 4  | 4 | 4  |
| 99 | 99 | 3  | 3  | 1 | 2  |
| 4  | 4  | 3  | 3  | 3 | 4  |
| 2  | 1  | 2  | 2  | 3 | 1  |
| 4  | 4  | 2  | 2  | 3 | 99 |
| 4  | 4  | 3  | 4  | 1 | 2  |
| 4  | 4  | 3  | 3  | 2 | 3  |
| 3  | 4  | 2  | 3  | 2 | 3  |
| 4  | 4  | 3  | 3  | 3 | 2  |
| 3  | 4  | 3  | 3  | 3 | 3  |
| 4  | 4  | 3  | 3  | 2 | 3  |
| 4  | 3  | 4  | 4  | 4 | 4  |
| 2  | 2  | 3  | 3  | 2 | 3  |
| 4  | 4  | 1  | 2  | 1 | 1  |
| 4  | 4  | 4  | 3  | 2 | 2  |
| 4  | 4  | 99 | 99 | 2 | 2  |
| 2  | 99 | 2  | 2  | 2 | 2  |
| 4  | 4  | 2  | 2  | 2 | 3  |
| 3  | 3  | 3  | 2  | 3 | 3  |
| 4  | 3  | 3  | 3  | 3 | 4  |
| 4  | 4  | 3  | 2  | 3 | 3  |
| 4  | 4  | 3  | 2  | 2 | 3  |
| 3  | 3  | 3  | 3  | 2 | 2  |
| 0  | 0  | 1  | 1  | 2 | 2  |
| 4  | 4  | 3  | 4  | 4 | 3  |
| 4  | 4  | 4  | 4  | 4 | 4  |
| 4  | 4  | 3  | 2  | 3 | 1  |
| 3  | 2  | 3  | 3  | 3 | 2  |
| 3  | 4  | 3  | 2  | 1 | 1  |
| 2  | 1  | 2  | 2  | 2 | 3  |
| 4  | 4  | 3  | 3  | 3 | 2  |
| 3  | 3  | 3  | 4  | 3 | 2  |
| 4  | 3  | 4  | 4  | 4 | 3  |
| 4  | 3  | 3  | 3  | 3 | 3  |
| 4  | 4  | 3  | 3  | 3 | 2  |
| 4  | 4  | 2  | 2  | 2 | 3  |
| 0  | 1  | 2  | 2  | 4 | 4  |
| 4  | 4  | 3  | 3  | 4 | 4  |

|    |    |    |    |    |    |
|----|----|----|----|----|----|
| 3  | 3  | 3  | 2  | 1  | 2  |
| 3  | 3  | 4  | 3  | 3  | 1  |
| 0  | 0  | 4  | 3  | 4  | 2  |
| 2  | 2  | 3  | 3  | 3  | 3  |
| 99 | 99 | 99 | 99 | 99 | 99 |
| 4  | 4  | 3  | 3  | 3  | 3  |
| 4  | 4  | 1  | 1  | 3  | 2  |
| 0  | 0  | 2  | 2  | 2  | 2  |
| 3  | 2  | 2  | 2  | 2  | 3  |
| 4  | 4  | 3  | 3  | 3  | 2  |
| 4  | 4  | 3  | 3  | 3  | 3  |
| 2  | 3  | 3  | 3  | 1  | 3  |
| 4  | 4  | 3  | 3  | 3  | 3  |
| 4  | 4  | 1  | 3  | 3  | 2  |
| 2  | 0  | 4  | 4  | 3  | 3  |
| 2  | 2  | 2  | 2  | 2  | 3  |
| 0  | 0  | 3  | 2  | 3  | 2  |
| 4  | 4  | 3  | 3  | 3  | 3  |
| 2  | 3  | 4  | 4  | 4  | 2  |
| 3  | 4  | 4  | 3  | 2  | 3  |
| 99 | 99 | 4  | 4  | 4  | 4  |
| 3  | 3  | 4  | 4  | 3  | 3  |
| 4  | 4  | 4  | 4  | 3  | 3  |
| 4  | 4  | 2  | 3  | 2  | 2  |
| 4  | 4  | 2  | 2  | 3  | 3  |
| 2  | 2  | 2  | 2  | 2  | 3  |
| 4  | 4  | 3  | 3  | 99 | 3  |
| 3  | 3  | 4  | 3  | 3  | 3  |
| 4  | 4  | 4  | 4  | 4  | 4  |
| 4  | 4  | 3  | 3  | 3  | 3  |
| 4  | 4  | 2  | 3  | 2  | 99 |
| 3  | 3  | 2  | 3  | 2  | 2  |
| 3  | 2  | 2  | 3  | 4  | 3  |
| 4  | 4  | 3  | 3  | 3  | 4  |
| 2  | 2  | 1  | 3  | 3  | 3  |
| 2  | 2  | 3  | 2  | 2  | 1  |
| 4  | 4  | 3  | 4  | 3  | 3  |
| 4  | 4  | 3  | 3  | 3  | 3  |
| 4  | 4  | 3  | 3  | 2  | 3  |
| 4  | 4  | 3  | 3  | 2  | 2  |
| 3  | 2  | 3  | 2  | 4  | 2  |
| 3  | 4  | 3  | 2  | 2  | 4  |
| 4  | 4  | 3  | 2  | 1  | 3  |
| 1  | 2  | 2  | 3  | 3  | 3  |
| 4  | 4  | 4  | 4  | 1  | 1  |
| 2  | 2  | 2  | 2  | 1  | 1  |
| 1  | 1  | 4  | 1  | 1  | 1  |
| 3  | 4  | 3  | 3  | 3  | 3  |

|   |   |   |   |   |    |
|---|---|---|---|---|----|
| 3 | 4 | 4 | 3 | 4 | 2  |
| 4 | 3 | 3 | 3 | 2 | 3  |
| 4 | 4 | 2 | 2 | 3 | 2  |
| 2 | 1 | 3 | 2 | 3 | 4  |
| 4 | 4 | 4 | 4 | 4 | 4  |
| 3 | 4 | 4 | 4 | 4 | 3  |
| 4 | 4 | 1 | 1 | 1 | 1  |
| 2 | 2 | 2 | 2 | 3 | 2  |
| 4 | 4 | 3 | 4 | 3 | 4  |
| 1 | 2 | 3 | 2 | 1 | 2  |
| 1 | 3 | 3 | 4 | 3 | 3  |
| 0 | 1 | 3 | 3 | 4 | 4  |
| 4 | 4 | 4 | 4 | 4 | 4  |
| 4 | 4 | 3 | 3 | 3 | 2  |
| 1 | 4 | 3 | 3 | 3 | 3  |
| 3 | 2 | 4 | 4 | 1 | 1  |
| 3 | 4 | 4 | 3 | 1 | 4  |
| 4 | 4 | 4 | 4 | 4 | 4  |
| 4 | 4 | 3 | 2 | 2 | 3  |
| 4 | 4 | 3 | 3 | 4 | 3  |
| 4 | 4 | 4 | 4 | 3 | 4  |
| 4 | 4 | 3 | 3 | 3 | 3  |
| 3 | 3 | 3 | 3 | 3 | 2  |
| 3 | 3 | 3 | 4 | 4 | 4  |
| 3 | 4 | 4 | 4 | 1 | 4  |
| 2 | 1 | 4 | 4 | 3 | 3  |
| 4 | 4 | 3 | 3 | 2 | 3  |
| 4 | 4 | 3 | 3 | 3 | 3  |
| 4 | 4 | 3 | 3 | 3 | 3  |
| 4 | 4 | 3 | 3 | 4 | 2  |
| 4 | 4 | 3 | 2 | 1 | 4  |
| 3 | 3 | 4 | 3 | 4 | 3  |
| 3 | 3 | 3 | 3 | 3 | 2  |
| 2 | 3 | 3 | 2 | 3 | 1  |
| 3 | 2 | 3 | 3 | 2 | 2  |
| 4 | 4 | 2 | 2 | 3 | 3  |
| 3 | 3 | 4 | 3 | 3 | 3  |
| 4 | 4 | 3 | 1 | 2 | 1  |
| 4 | 4 | 3 | 3 | 2 | 2  |
| 1 | 1 | 2 | 2 | 1 | 1  |
| 4 | 4 | 3 | 3 | 3 | 2  |
| 4 | 1 | 4 | 3 | 4 | 4  |
| 1 | 1 | 1 | 2 | 1 | 99 |
| 4 | 4 | 3 | 4 | 4 | 2  |
| 4 | 4 | 3 | 3 | 3 | 4  |
| 4 | 4 | 2 | 3 | 1 | 3  |
| 4 | 4 | 4 | 4 | 3 | 2  |
| 4 | 0 | 3 | 2 | 1 | 1  |

|   |   |   |   |   |    |
|---|---|---|---|---|----|
| 2 | 2 | 3 | 3 | 2 | 2  |
| 4 | 4 | 3 | 3 | 3 | 99 |
| 4 | 4 | 2 | 1 | 2 | 3  |
| 1 | 1 | 3 | 2 | 2 | 1  |
| 2 | 2 | 3 | 1 | 3 | 1  |
| 3 | 4 | 4 | 1 | 1 | 1  |
| 4 | 3 | 3 | 3 | 2 | 2  |
| 4 | 4 | 4 | 1 | 4 | 2  |
| 4 | 4 | 4 | 2 | 3 | 3  |
| 4 | 4 | 3 | 3 | 4 | 2  |
| 0 | 0 | 1 | 1 | 1 | 1  |
| 4 | 4 | 3 | 2 | 3 | 3  |
| 1 | 1 | 3 | 3 | 3 | 3  |
| 4 | 3 | 3 | 3 | 3 | 1  |
| 2 | 2 | 3 | 3 | 3 | 3  |
| 2 | 2 | 3 | 3 | 3 | 3  |
| 4 | 4 | 4 | 4 | 4 | 2  |
| 4 | 4 | 3 | 2 | 2 | 2  |
| 4 | 4 | 2 | 2 | 2 | 3  |
| 2 | 2 | 3 | 2 | 1 | 99 |
| 4 | 4 | 3 | 3 | 2 | 2  |
| 4 | 4 | 2 | 2 | 2 | 3  |
| 3 | 3 | 2 | 2 | 2 | 3  |
| 4 | 4 | 3 | 2 | 2 | 2  |
| 3 | 4 | 3 | 2 | 1 | 3  |
| 2 | 2 | 3 | 2 | 1 | 2  |
| 2 | 2 | 3 | 3 | 3 | 3  |
| 4 | 4 | 4 | 3 | 2 | 3  |
| 3 | 3 | 2 | 2 | 2 | 2  |
| 4 | 4 | 3 | 3 | 2 | 2  |
| 3 | 3 | 3 | 3 | 3 | 3  |
| 4 | 4 | 4 | 4 | 4 | 2  |
| 3 | 2 | 4 | 2 | 2 | 3  |
| 1 | 2 | 3 | 3 | 2 | 1  |
| 1 | 1 | 1 | 2 | 1 | 1  |
| 4 | 4 | 3 | 3 | 2 | 3  |
| 4 | 4 | 2 | 2 | 1 | 4  |
| 4 | 4 | 3 | 2 | 2 | 3  |
| 3 | 4 | 2 | 4 | 4 | 3  |
| 3 | 4 | 3 | 3 | 1 | 2  |
| 4 | 4 | 3 | 3 | 3 | 3  |
| 0 | 0 | 3 | 3 | 3 | 3  |
| 4 | 4 | 3 | 3 | 2 | 1  |
| 4 | 4 | 3 | 1 | 2 | 3  |
| 4 | 4 | 2 | 3 | 2 | 2  |
| 4 | 4 | 3 | 2 | 2 | 3  |
| 4 | 4 | 3 | 3 | 3 | 3  |
| 4 | 4 | 4 | 3 | 3 | 2  |

|   |   |    |   |    |   |
|---|---|----|---|----|---|
| 3 | 3 | 4  | 4 | 4  | 4 |
| 3 | 3 | 3  | 3 | 3  | 1 |
| 0 | 0 | 1  | 1 | 1  | 1 |
| 4 | 4 | 2  | 2 | 2  | 3 |
| 1 | 1 | 3  | 3 | 2  | 3 |
| 3 | 3 | 2  | 3 | 3  | 2 |
| 4 | 4 | 3  | 3 | 3  | 2 |
| 0 | 0 | 99 | 4 | 99 | 2 |
| 2 | 2 | 3  | 3 | 2  | 3 |
| 0 | 0 | 4  | 4 | 4  | 4 |
| 2 | 2 | 2  | 2 | 2  | 2 |
| 4 | 2 | 3  | 3 | 1  | 1 |
| 2 | 2 | 2  | 2 | 1  | 2 |
| 1 | 1 | 4  | 4 | 3  | 3 |
| 3 | 3 | 2  | 3 | 2  | 3 |
| 2 | 2 | 2  | 2 | 3  | 3 |
| 0 | 2 | 3  | 3 | 3  | 4 |
| 4 | 4 | 4  | 3 | 3  | 2 |
| 4 | 4 | 3  | 3 | 3  | 2 |
| 4 | 4 | 3  | 3 | 2  | 3 |
| 4 | 4 | 3  | 3 | 4  | 4 |
| 4 | 4 | 2  | 3 | 3  | 3 |
| 2 | 2 | 3  | 3 | 3  | 3 |
| 3 | 2 | 3  | 2 | 3  | 2 |
| 2 | 2 | 2  | 2 | 3  | 2 |
| 3 | 2 | 1  | 3 | 2  | 4 |
| 4 | 3 | 3  | 3 | 3  | 3 |
| 4 | 0 | 1  | 3 | 3  | 4 |
| 0 | 2 | 1  | 1 | 1  | 1 |
| 4 | 4 | 4  | 4 | 4  | 4 |
| 4 | 4 | 4  | 3 | 3  | 2 |
| 4 | 4 | 3  | 4 | 3  | 3 |
| 1 | 1 | 1  | 2 | 2  | 3 |
| 4 | 4 | 3  | 3 | 2  | 3 |
| 4 | 4 | 2  | 3 | 2  | 3 |
| 4 | 3 | 3  | 3 | 3  | 2 |
| 3 | 2 | 2  | 2 | 2  | 3 |
| 4 | 4 | 3  | 3 | 3  | 3 |
| 4 | 3 | 3  | 3 | 3  | 3 |
| 4 | 4 | 3  | 3 | 2  | 3 |
| 4 | 4 | 4  | 1 | 1  | 1 |
| 4 | 4 | 4  | 3 | 2  | 2 |
| 4 | 3 | 1  | 3 | 3  | 4 |
| 3 | 3 | 4  | 4 | 3  | 2 |
| 4 | 4 | 4  | 3 | 4  | 3 |
| 3 | 4 | 1  | 1 | 1  | 4 |
| 4 | 4 | 4  | 3 | 3  | 1 |
| 4 | 4 | 3  | 2 | 3  | 3 |

|   |   |    |   |    |    |
|---|---|----|---|----|----|
| 1 | 0 | 2  | 1 | 3  | 1  |
| 4 | 3 | 2  | 2 | 1  | 1  |
| 4 | 4 | 2  | 2 | 2  | 1  |
| 4 | 4 | 3  | 3 | 4  | 3  |
| 3 | 3 | 3  | 4 | 3  | 4  |
| 4 | 4 | 99 | 4 | 3  | 2  |
| 0 | 0 | 3  | 3 | 3  | 3  |
| 1 | 1 | 2  | 2 | 1  | 1  |
| 2 | 4 | 99 | 3 | 3  | 1  |
| 3 | 3 | 3  | 1 | 1  | 3  |
| 4 | 4 | 3  | 3 | 3  | 3  |
| 4 | 4 | 3  | 4 | 4  | 4  |
| 3 | 4 | 3  | 3 | 99 | 99 |
| 3 | 3 | 3  | 3 | 3  | 2  |
| 4 | 4 | 99 | 2 | 99 | 4  |
| 0 | 0 | 3  | 1 | 1  | 3  |
| 4 | 4 | 3  | 3 | 3  | 3  |
| 3 | 3 | 3  | 3 | 3  | 3  |
| 3 | 3 | 3  | 2 | 1  | 1  |
| 4 | 4 | 3  | 3 | 1  | 2  |
| 3 | 3 | 4  | 4 | 3  | 3  |
| 2 | 3 | 3  | 3 | 2  | 2  |
| 3 | 4 | 2  | 2 | 3  | 2  |
| 4 | 4 | 2  | 2 | 2  | 2  |
| 4 | 4 | 3  | 3 | 3  | 3  |
| 4 | 4 | 3  | 3 | 3  | 3  |
| 4 | 4 | 3  | 2 | 1  | 3  |
| 4 | 4 | 4  | 4 | 4  | 2  |
| 4 | 4 | 3  | 3 | 3  | 4  |
| 4 | 4 | 2  | 3 | 2  | 3  |
| 4 | 4 | 4  | 4 | 4  | 3  |
| 4 | 4 | 4  | 4 | 4  | 1  |
| 3 | 3 | 2  | 2 | 3  | 3  |
| 4 | 4 | 3  | 2 | 3  | 3  |
| 3 | 3 | 1  | 1 | 2  | 3  |
| 3 | 4 | 2  | 2 | 2  | 2  |
| 4 | 4 | 4  | 4 | 4  | 3  |
| 2 | 2 | 3  | 1 | 1  | 2  |
| 4 | 4 | 2  | 2 | 1  | 2  |
| 4 | 4 | 3  | 3 | 2  | 2  |
| 4 | 4 | 1  | 1 | 1  | 1  |
| 4 | 4 | 2  | 1 | 1  | 2  |
| 1 | 1 | 1  | 3 | 1  | 3  |
| 4 | 4 | 4  | 4 | 4  | 3  |
| 1 | 1 | 3  | 3 | 3  | 3  |
| 4 | 4 | 3  | 3 | 3  | 3  |
| 2 | 2 | 2  | 3 | 99 | 99 |
| 4 | 4 | 3  | 2 | 1  | 3  |

|    |    |    |    |   |    |
|----|----|----|----|---|----|
| 4  | 4  | 4  | 3  | 3 | 2  |
| 3  | 3  | 4  | 4  | 4 | 4  |
| 4  | 4  | 2  | 2  | 3 | 2  |
| 4  | 4  | 3  | 3  | 1 | 3  |
| 4  | 4  | 3  | 4  | 3 | 2  |
| 0  | 0  | 4  | 4  | 4 | 4  |
| 0  | 0  | 1  | 1  | 1 | 1  |
| 4  | 4  | 4  | 4  | 4 | 2  |
| 4  | 4  | 3  | 3  | 2 | 1  |
| 4  | 4  | 3  | 3  | 3 | 3  |
| 3  | 2  | 2  | 2  | 3 | 2  |
| 4  | 3  | 3  | 2  | 2 | 2  |
| 3  | 3  | 1  | 2  | 1 | 1  |
| 4  | 4  | 3  | 2  | 1 | 1  |
| 4  | 4  | 3  | 3  | 2 | 3  |
| 4  | 4  | 3  | 3  | 3 | 3  |
| 4  | 4  | 4  | 4  | 4 | 4  |
| 4  | 3  | 3  | 3  | 3 | 2  |
| 2  | 2  | 3  | 2  | 1 | 1  |
| 1  | 0  | 4  | 3  | 3 | 4  |
| 2  | 2  | 3  | 3  | 3 | 3  |
| 4  | 4  | 4  | 4  | 3 | 3  |
| 4  | 4  | 4  | 4  | 4 | 4  |
| 4  | 4  | 3  | 3  | 3 | 3  |
| 4  | 4  | 3  | 2  | 2 | 2  |
| 4  | 4  | 2  | 2  | 3 | 3  |
| 4  | 4  | 3  | 3  | 2 | 2  |
| 4  | 4  | 4  | 3  | 3 | 3  |
| 0  | 4  | 1  | 1  | 1 | 1  |
| 4  | 4  | 1  | 3  | 3 | 3  |
| 4  | 4  | 3  | 4  | 4 | 4  |
| 3  | 4  | 3  | 3  | 3 | 3  |
| 4  | 4  | 2  | 3  | 3 | 3  |
| 4  | 4  | 3  | 3  | 3 | 3  |
| 4  | 4  | 3  | 3  | 4 | 4  |
| 4  | 4  | 3  | 4  | 4 | 4  |
| 4  | 4  | 3  | 3  | 3 | 3  |
| 99 | 99 | 99 | 99 | 3 | 99 |
| 2  | 2  | 3  | 3  | 3 | 4  |
| 3  | 4  | 4  | 4  | 4 | 4  |
| 4  | 4  | 3  | 4  | 4 | 3  |
| 4  | 3  | 4  | 4  | 3 | 3  |
| 4  | 4  | 4  | 4  | 4 | 4  |
| 4  | 0  | 4  | 4  | 4 | 4  |
| 2  | 2  | 3  | 4  | 4 | 3  |
| 4  | 4  | 4  | 4  | 4 | 4  |
| 4  | 4  | 4  | 4  | 4 | 4  |
| 4  | 3  | 3  | 4  | 4 | 4  |



|    |    |    |    |    |    |
|----|----|----|----|----|----|
| 4  | 4  | 2  | 2  | 3  | 3  |
| 4  | 4  | 3  | 1  | 4  | 4  |
| 4  | 4  | 3  | 3  | 4  | 4  |
| 4  | 4  | 3  | 4  | 4  | 4  |
| 3  | 4  | 3  | 3  | 3  | 3  |
| 4  | 3  | 3  | 3  | 3  | 3  |
| 4  | 4  | 3  | 4  | 4  | 4  |
| 4  | 4  | 2  | 3  | 3  | 3  |
| 2  | 0  | 3  | 3  | 3  | 3  |
| 4  | 3  | 3  | 3  | 3  | 3  |
| 4  | 4  | 4  | 4  | 4  | 4  |
| 3  | 4  | 3  | 3  | 4  | 4  |
| 99 | 99 | 99 | 2  | 4  | 3  |
| 4  | 4  | 3  | 3  | 3  | 3  |
| 4  | 4  | 3  | 1  | 3  | 3  |
| 4  | 3  | 3  | 3  | 3  | 3  |
| 4  | 4  | 3  | 3  | 3  | 3  |
| 4  | 2  | 99 | 99 | 99 | 99 |
| 3  | 2  | 3  | 3  | 4  | 3  |
| 2  | 4  | 4  | 4  | 4  | 1  |
| 4  | 4  | 3  | 3  | 4  | 2  |
| 4  | 4  | 3  | 3  | 3  | 4  |
| 3  | 3  | 3  | 4  | 4  | 3  |
| 3  | 4  | 3  | 3  | 4  | 3  |
| 0  | 0  | 2  | 4  | 4  | 4  |
| 4  | 4  | 3  | 3  | 2  | 3  |
| 4  | 4  | 4  | 4  | 4  | 3  |
| 4  | 4  | 3  | 4  | 4  | 4  |
| 4  | 4  | 4  | 4  | 3  | 4  |
| 4  | 4  | 3  | 3  | 2  | 2  |
| 4  | 4  | 4  | 4  | 4  | 4  |
| 4  | 4  | 3  | 3  | 3  | 2  |
| 4  | 4  | 3  | 3  | 3  | 3  |
| 4  | 4  | 3  | 3  | 3  | 3  |
| 4  | 4  | 4  | 3  | 3  | 3  |
| 4  | 3  | 4  | 4  | 4  | 4  |
| 0  | 0  | 4  | 4  | 4  | 4  |
| 4  | 4  | 3  | 4  | 2  | 3  |
| 1  | 0  | 4  | 1  | 4  | 1  |
| 4  | 4  | 4  | 4  | 4  | 4  |
| 4  | 4  | 3  | 3  | 3  | 3  |
| 4  | 4  | 4  | 4  | 4  | 4  |
| 4  | 4  | 3  | 3  | 3  | 2  |
| 4  | 4  | 3  | 3  | 3  | 3  |
| 2  | 1  | 3  | 3  | 1  | 3  |
| 1  | 4  | 3  | 2  | 3  | 4  |
| 4  | 4  | 2  | 2  | 2  | 3  |
| 3  | 3  | 3  | 3  | 1  | 2  |

|   |   |    |    |    |   |
|---|---|----|----|----|---|
| 4 | 4 | 3  | 3  | 4  | 4 |
| 4 | 4 | 4  | 4  | 4  | 4 |
| 4 | 4 | 4  | 4  | 3  | 2 |
| 4 | 4 | 4  | 4  | 4  | 4 |
| 4 | 4 | 3  | 3  | 3  | 3 |
| 4 | 3 | 3  | 3  | 3  | 3 |
| 4 | 4 | 4  | 4  | 4  | 3 |
| 4 | 4 | 3  | 3  | 3  | 3 |
| 4 | 4 | 4  | 4  | 4  | 4 |
| 4 | 4 | 3  | 4  | 2  | 3 |
| 2 | 2 | 2  | 3  | 4  | 4 |
| 2 | 2 | 3  | 3  | 4  | 3 |
| 0 | 0 | 3  | 3  | 3  | 3 |
| 4 | 2 | 4  | 4  | 4  | 3 |
| 4 | 4 | 3  | 3  | 3  | 3 |
| 3 | 4 | 3  | 3  | 3  | 3 |
| 4 | 4 | 3  | 2  | 3  | 3 |
| 3 | 4 | 3  | 4  | 2  | 1 |
| 4 | 4 | 3  | 3  | 2  | 3 |
| 4 | 3 | 3  | 3  | 3  | 3 |
| 4 | 4 | 2  | 99 | 99 | 2 |
| 4 | 4 | 4  | 4  | 4  | 4 |
| 4 | 4 | 4  | 4  | 4  | 4 |
| 4 | 4 | 2  | 4  | 3  | 3 |
| 0 | 0 | 4  | 4  | 4  | 4 |
| 4 | 4 | 3  | 3  | 3  | 3 |
| 4 | 4 | 3  | 3  | 3  | 2 |
| 4 | 4 | 3  | 4  | 3  | 4 |
| 4 | 4 | 4  | 4  | 4  | 4 |
| 4 | 4 | 3  | 3  | 3  | 3 |
| 3 | 4 | 3  | 3  | 2  | 2 |
| 0 | 0 | 3  | 3  | 3  | 3 |
| 3 | 3 | 3  | 3  | 3  | 3 |
| 4 | 4 | 2  | 3  | 4  | 4 |
| 4 | 3 | 2  | 1  | 1  | 3 |
| 4 | 3 | 99 | 1  | 3  | 2 |
| 4 | 4 | 4  | 4  | 4  | 4 |
| 4 | 4 | 3  | 3  | 3  | 4 |
| 4 | 4 | 3  | 3  | 3  | 3 |
| 4 | 4 | 3  | 3  | 3  | 3 |
| 4 | 4 | 2  | 3  | 3  | 3 |
| 3 | 3 | 3  | 3  | 3  | 3 |
| 3 | 3 | 3  | 3  | 3  | 2 |
| 2 | 2 | 3  | 2  | 2  | 3 |
| 4 | 4 | 3  | 2  | 2  | 2 |
| 4 | 4 | 4  | 4  | 4  | 3 |
| 3 | 3 | 3  | 3  | 2  | 1 |
| 2 | 1 | 2  | 3  | 3  | 3 |

|   |   |   |   |    |   |
|---|---|---|---|----|---|
| 4 | 4 | 3 | 3 | 3  | 3 |
| 4 | 4 | 3 | 3 | 2  | 2 |
| 4 | 4 | 3 | 3 | 4  | 3 |
| 3 | 3 | 1 | 1 | 1  | 3 |
| 0 | 0 | 2 | 3 | 3  | 3 |
| 3 | 2 | 3 | 3 | 3  | 3 |
| 4 | 4 | 4 | 4 | 4  | 4 |
| 4 | 4 | 3 | 3 | 3  | 3 |
| 4 | 4 | 3 | 4 | 4  | 4 |
| 4 | 4 | 4 | 3 | 4  | 4 |
| 2 | 3 | 4 | 3 | 99 | 4 |
| 4 | 4 | 2 | 3 | 1  | 3 |
| 3 | 3 | 3 | 3 | 1  | 3 |
| 4 | 4 | 4 | 3 | 2  | 3 |
| 4 | 4 | 4 | 4 | 3  | 3 |
| 4 | 4 | 4 | 4 | 4  | 4 |
| 4 | 4 | 4 | 4 | 4  | 4 |
| 4 | 4 | 4 | 1 | 1  | 3 |
| 4 | 0 | 2 | 3 | 4  | 4 |
| 4 | 4 | 4 | 3 | 4  | 4 |
| 4 | 4 | 4 | 2 | 2  | 2 |
| 4 | 4 | 4 | 4 | 3  | 3 |
| 2 | 3 | 4 | 4 | 3  | 4 |
| 4 | 4 | 3 | 3 | 3  | 3 |
| 3 | 3 | 3 | 2 | 2  | 2 |
| 4 | 3 | 4 | 4 | 4  | 4 |
| 4 | 4 | 2 | 3 | 3  | 3 |
| 4 | 4 | 3 | 3 | 3  | 3 |
| 4 | 4 | 3 | 3 | 3  | 4 |
| 1 | 1 | 2 | 3 | 3  | 3 |
| 4 | 4 | 3 | 4 | 3  | 4 |
| 4 | 4 | 4 | 4 | 3  | 3 |
| 2 | 2 | 2 | 3 | 3  | 3 |
| 4 | 4 | 3 | 3 | 3  | 2 |
| 0 | 0 | 3 | 3 | 3  | 3 |
| 4 | 4 | 4 | 4 | 3  | 3 |
| 4 | 4 | 3 | 3 | 3  | 3 |
| 4 | 4 | 3 | 3 | 4  | 4 |
| 4 | 4 | 1 | 1 | 1  | 4 |
| 4 | 4 | 3 | 4 | 1  | 1 |
| 4 | 4 | 2 | 3 | 4  | 3 |
| 4 | 4 | 4 | 3 | 3  | 2 |
| 4 | 4 | 4 | 1 | 1  | 4 |
| 4 | 4 | 3 | 2 | 3  | 3 |
| 4 | 3 | 4 | 4 | 3  | 2 |
| 4 | 4 | 3 | 3 | 3  | 3 |
| 3 | 4 | 4 | 3 | 4  | 2 |
| 4 | 4 | 3 | 2 | 1  | 3 |
| 4 | 4 | 4 | 4 | 2  | 2 |
| 4 | 1 | 3 | 4 | 1  | 2 |

|    |    |    |    |    |    |
|----|----|----|----|----|----|
| 2  | 2  | 3  | 2  | 99 | 1  |
| 4  | 4  | 1  | 1  | 1  | 1  |
| 4  | 4  | 3  | 2  | 3  | 2  |
| 4  | 3  | 3  | 3  | 3  | 2  |
| 99 | 2  | 4  | 4  | 3  | 3  |
| 4  | 4  | 4  | 4  | 2  | 2  |
| 3  | 3  | 3  | 3  | 3  | 3  |
| 4  | 4  | 2  | 2  | 2  | 1  |
| 4  | 4  | 3  | 3  | 99 | 99 |
| 4  | 4  | 3  | 2  | 1  | 1  |
| 2  | 1  | 1  | 2  | 2  | 3  |
| 4  | 4  | 4  | 4  | 4  | 3  |
| 3  | 3  | 3  | 3  | 3  | 3  |
| 4  | 4  | 3  | 3  | 3  | 3  |
| 4  | 2  | 3  | 2  | 2  | 3  |
| 4  | 4  | 4  | 2  | 3  | 2  |
| 4  | 4  | 3  | 4  | 4  | 3  |
| 4  | 4  | 4  | 4  | 4  | 2  |
| 4  | 4  | 2  | 3  | 3  | 2  |
| 4  | 4  | 3  | 3  | 2  | 2  |
| 0  | 1  | 4  | 4  | 4  | 1  |
| 1  | 0  | 4  | 3  | 2  | 1  |
| 4  | 4  | 3  | 4  | 3  | 3  |
| 3  | 1  | 4  | 4  | 3  | 4  |
| 1  | 0  | 2  | 2  | 1  | 1  |
| 99 | 99 | 99 | 99 | 99 | 99 |
| 4  | 4  | 2  | 3  | 2  | 1  |
| 4  | 4  | 3  | 1  | 1  | 2  |
| 3  | 3  | 3  | 2  | 2  | 2  |
| 4  | 4  | 3  | 3  | 3  | 3  |
| 4  | 4  | 3  | 3  | 3  | 2  |
| 4  | 4  | 2  | 3  | 3  | 2  |
| 2  | 1  | 3  | 2  | 3  | 3  |
| 4  | 4  | 3  | 3  | 3  | 2  |
| 4  | 4  | 2  | 2  | 2  | 2  |
| 4  | 4  | 4  | 4  | 4  | 3  |
| 4  | 4  | 3  | 3  | 3  | 3  |
| 2  | 2  | 2  | 2  | 2  | 2  |
| 4  | 3  | 3  | 2  | 3  | 2  |
| 4  | 4  | 3  | 3  | 3  | 3  |
| 3  | 3  | 2  | 2  | 2  | 3  |
| 4  | 3  | 3  | 2  | 3  | 3  |
| 4  | 4  | 1  | 2  | 3  | 3  |
| 3  | 3  | 3  | 4  | 3  | 4  |
| 3  | 2  | 3  | 2  | 1  | 2  |
| 3  | 3  | 3  | 2  | 2  | 2  |
| 4  | 4  | 3  | 3  | 3  | 2  |
| 3  | 3  | 3  | 3  | 3  | 99 |

|    |   |   |    |    |    |
|----|---|---|----|----|----|
| 4  | 4 | 3 | 3  | 3  | 3  |
| 3  | 3 | 3 | 3  | 3  | 2  |
| 4  | 4 | 3 | 3  | 2  | 1  |
| 4  | 4 | 3 | 2  | 2  | 2  |
| 4  | 3 | 4 | 4  | 3  | 3  |
| 4  | 4 | 4 | 4  | 4  | 4  |
| 3  | 4 | 4 | 4  | 4  | 3  |
| 2  | 2 | 3 | 3  | 3  | 3  |
| 4  | 4 | 3 | 2  | 1  | 1  |
| 2  | 1 | 3 | 3  | 3  | 3  |
| 4  | 4 | 4 | 4  | 3  | 3  |
| 4  | 4 | 3 | 3  | 2  | 2  |
| 4  | 4 | 3 | 3  | 99 | 99 |
| 4  | 4 | 2 | 2  | 3  | 3  |
| 3  | 3 | 3 | 3  | 99 | 99 |
| 3  | 3 | 3 | 4  | 3  | 3  |
| 1  | 0 | 2 | 3  | 3  | 3  |
| 4  | 4 | 3 | 3  | 3  | 3  |
| 4  | 4 | 4 | 4  | 4  | 1  |
| 3  | 4 | 3 | 3  | 2  | 2  |
| 3  | 3 | 2 | 2  | 3  | 2  |
| 4  | 3 | 3 | 3  | 4  | 3  |
| 4  | 4 | 3 | 3  | 3  | 3  |
| 3  | 4 | 4 | 3  | 1  | 2  |
| 3  | 2 | 3 | 2  | 2  | 2  |
| 4  | 4 | 4 | 4  | 2  | 2  |
| 3  | 4 | 3 | 3  | 1  | 3  |
| 2  | 3 | 3 | 2  | 99 | 2  |
| 0  | 0 | 2 | 1  | 4  | 4  |
| 4  | 3 | 3 | 3  | 3  | 2  |
| 4  | 3 | 1 | 99 | 99 | 4  |
| 4  | 4 | 3 | 4  | 3  | 4  |
| 4  | 4 | 3 | 3  | 3  | 3  |
| 4  | 4 | 2 | 3  | 3  | 3  |
| 4  | 4 | 3 | 2  | 3  | 3  |
| 3  | 1 | 3 | 3  | 2  | 2  |
| 3  | 4 | 4 | 4  | 4  | 3  |
| 4  | 4 | 3 | 3  | 3  | 3  |
| 4  | 4 | 3 | 3  | 1  | 3  |
| 2  | 2 | 3 | 3  | 3  | 3  |
| 4  | 4 | 3 | 2  | 2  | 3  |
| 3  | 3 | 4 | 3  | 3  | 3  |
| 4  | 4 | 3 | 3  | 3  | 2  |
| 4  | 0 | 3 | 2  | 3  | 2  |
| 99 | 0 | 3 | 3  | 3  | 3  |
| 4  | 4 | 1 | 3  | 3  | 3  |
| 3  | 3 | 2 | 1  | 2  | 1  |
| 4  | 4 | 3 | 4  | 4  | 2  |

|    |    |    |    |    |    |
|----|----|----|----|----|----|
| 2  | 2  | 3  | 3  | 3  | 3  |
| 2  | 2  | 3  | 2  | 2  | 3  |
| 4  | 4  | 4  | 4  | 3  | 3  |
| 99 | 99 | 99 | 99 | 99 | 99 |
| 4  | 4  | 3  | 4  | 4  | 4  |
| 0  | 3  | 2  | 4  | 4  | 4  |
| 3  | 2  | 3  | 3  | 2  | 2  |
| 4  | 3  | 4  | 3  | 2  | 2  |
| 4  | 3  | 3  | 3  | 3  | 2  |
| 4  | 4  | 4  | 4  | 3  | 1  |
| 99 | 99 | 99 | 99 | 1  | 99 |
| 4  | 4  | 3  | 4  | 3  | 2  |
| 3  | 99 | 1  | 1  | 1  | 1  |
| 4  | 4  | 1  | 1  | 1  | 2  |
| 3  | 3  | 2  | 2  | 2  | 2  |
| 4  | 4  | 3  | 3  | 3  | 2  |
| 4  | 4  | 3  | 3  | 1  | 3  |
| 3  | 3  | 3  | 3  | 2  | 1  |
| 2  | 3  | 4  | 4  | 4  | 1  |
| 4  | 4  | 2  | 2  | 2  | 4  |
| 4  | 4  | 2  | 3  | 1  | 2  |
| 4  | 4  | 3  | 3  | 2  | 2  |
| 0  | 0  | 3  | 1  | 1  | 1  |
| 2  | 2  | 3  | 2  | 99 | 2  |
| 4  | 0  | 2  | 4  | 3  | 3  |
| 4  | 4  | 3  | 3  | 3  | 3  |
| 4  | 2  | 3  | 2  | 2  | 2  |
| 4  | 4  | 4  | 4  | 4  | 2  |
| 2  | 1  | 3  | 2  | 2  | 3  |
| 4  | 99 | 3  | 3  | 3  | 2  |
| 4  | 4  | 3  | 3  | 3  | 3  |
| 4  | 99 | 3  | 3  | 2  | 1  |
| 4  | 4  | 3  | 2  | 1  | 2  |
| 4  | 4  | 3  | 2  | 1  | 3  |
| 4  | 4  | 2  | 1  | 1  | 3  |
| 1  | 1  | 4  | 4  | 4  | 4  |
| 4  | 4  | 3  | 3  | 3  | 2  |
| 2  | 1  | 3  | 1  | 1  | 1  |
| 3  | 3  | 3  | 2  | 2  | 1  |
| 4  | 4  | 3  | 3  | 2  | 3  |
| 3  | 3  | 2  | 99 | 2  | 99 |
| 4  | 4  | 4  | 4  | 4  | 4  |
| 4  | 4  | 4  | 4  | 1  | 1  |
| 4  | 4  | 4  | 4  | 3  | 1  |
| 3  | 3  | 3  | 3  | 3  | 3  |
| 3  | 2  | 3  | 4  | 2  | 3  |
| 4  | 4  | 3  | 3  | 3  | 4  |
| 3  | 2  | 3  | 99 | 2  | 2  |

|    |    |    |    |    |    |
|----|----|----|----|----|----|
| 99 | 99 | 99 | 99 | 99 | 99 |
| 0  | 0  | 4  | 4  | 4  | 4  |
| 3  | 4  | 3  | 3  | 2  | 3  |
| 4  | 4  | 3  | 4  | 3  | 4  |
| 4  | 4  | 3  | 3  | 1  | 1  |
| 3  | 4  | 2  | 1  | 2  | 1  |
| 4  | 4  | 3  | 3  | 1  | 3  |
| 4  | 4  | 2  | 99 | 1  | 2  |
| 4  | 4  | 3  | 3  | 3  | 2  |
| 3  | 4  | 1  | 3  | 4  | 3  |
| 4  | 3  | 2  | 3  | 99 | 1  |
| 4  | 4  | 4  | 4  | 4  | 4  |
| 2  | 2  | 3  | 2  | 2  | 1  |
| 4  | 4  | 3  | 3  | 2  | 3  |
| 2  | 0  | 1  | 1  | 1  | 4  |
| 4  | 4  | 3  | 2  | 1  | 1  |
| 99 | 99 | 99 | 99 | 99 | 99 |
| 4  | 4  | 2  | 2  | 1  | 1  |
| 3  | 3  | 3  | 3  | 3  | 3  |
| 3  | 3  | 3  | 3  | 3  | 3  |
| 4  | 4  | 3  | 4  | 3  | 1  |
| 4  | 4  | 3  | 4  | 4  | 3  |
| 3  | 3  | 3  | 3  | 3  | 2  |
| 4  | 4  | 4  | 3  | 3  | 3  |
| 4  | 4  | 2  | 3  | 3  | 3  |
| 3  | 4  | 3  | 3  | 2  | 1  |
| 4  | 3  | 3  | 99 | 99 | 99 |
| 4  | 4  | 3  | 2  | 2  | 3  |
| 4  | 3  | 3  | 3  | 3  | 3  |
| 0  | 0  | 1  | 1  | 1  | 3  |
| 4  | 4  | 3  | 3  | 3  | 3  |
| 4  | 4  | 3  | 3  | 3  | 3  |
| 1  | 1  | 2  | 3  | 3  | 3  |
| 4  | 4  | 3  | 2  | 2  | 3  |
| 4  | 4  | 3  | 4  | 4  | 3  |
| 4  | 2  | 3  | 3  | 3  | 2  |
| 3  | 2  | 3  | 3  | 4  | 4  |
| 4  | 4  | 4  | 4  | 4  | 3  |
| 4  | 4  | 4  | 4  | 4  | 4  |
| 4  | 4  | 4  | 4  | 3  | 4  |
| 2  | 2  | 4  | 3  | 2  | 1  |
| 4  | 4  | 4  | 4  | 4  | 2  |
| 4  | 4  | 3  | 4  | 3  | 3  |
| 2  | 3  | 3  | 3  | 3  | 3  |
| 3  | 1  | 2  | 3  | 3  | 2  |
| 4  | 3  | 4  | 3  | 3  | 2  |
| 4  | 4  | 4  | 4  | 4  | 4  |
| 99 | 99 | 4  | 2  | 3  | 2  |

|    |    |    |    |    |    |
|----|----|----|----|----|----|
| 4  | 4  | 3  | 1  | 1  | 2  |
| 4  | 4  | 3  | 3  | 3  | 2  |
| 4  | 4  | 3  | 3  | 3  | 3  |
| 4  | 4  | 4  | 4  | 4  | 3  |
| 4  | 4  | 3  | 3  | 3  | 2  |
| 4  | 4  | 3  | 3  | 3  | 3  |
| 4  | 4  | 3  | 3  | 3  | 3  |
| 4  | 3  | 3  | 3  | 1  | 2  |
| 1  | 0  | 2  | 3  | 3  | 3  |
| 4  | 4  | 1  | 2  | 1  | 1  |
| 4  | 4  | 3  | 3  | 3  | 2  |
| 4  | 4  | 3  | 3  | 3  | 2  |
| 1  | 1  | 4  | 3  | 3  | 3  |
| 4  | 4  | 3  | 3  | 4  | 4  |
| 4  | 3  | 4  | 3  | 2  | 3  |
| 4  | 4  | 4  | 2  | 1  | 2  |
| 4  | 4  | 3  | 4  | 4  | 4  |
| 4  | 4  | 2  | 1  | 2  | 2  |
| 0  | 1  | 2  | 3  | 2  | 3  |
| 4  | 4  | 4  | 4  | 4  | 3  |
| 4  | 3  | 3  | 3  | 3  | 3  |
| 4  | 4  | 1  | 3  | 4  | 4  |
| 4  | 4  | 2  | 3  | 2  | 3  |
| 99 | 99 | 99 | 99 | 99 | 99 |
| 3  | 3  | 3  | 3  | 3  | 3  |
| 2  | 1  | 2  | 2  | 2  | 1  |
| 2  | 3  | 1  | 2  | 4  | 3  |
| 4  | 4  | 3  | 3  | 3  | 2  |
| 4  | 4  | 4  | 4  | 4  | 1  |
| 4  | 4  | 3  | 3  | 4  | 3  |
| 0  | 0  | 2  | 3  | 3  | 3  |
| 99 | 99 | 99 | 99 | 99 | 99 |
| 2  | 2  | 2  | 3  | 3  | 3  |
| 4  | 4  | 2  | 2  | 3  | 3  |
| 4  | 4  | 4  | 4  | 4  | 4  |
| 4  | 3  | 3  | 3  | 3  | 3  |
| 4  | 4  | 3  | 3  | 3  | 3  |
| 4  | 4  | 3  | 4  | 3  | 3  |
| 4  | 4  | 3  | 2  | 2  | 2  |
| 3  | 2  | 3  | 2  | 3  | 3  |
| 4  | 4  | 3  | 3  | 3  | 3  |
| 2  | 2  | 4  | 4  | 3  | 1  |
| 4  | 4  | 3  | 2  | 3  | 3  |
| 4  | 4  | 2  | 2  | 2  | 99 |
| 4  | 4  | 3  | 3  | 2  | 3  |
| 4  | 4  | 1  | 3  | 3  | 3  |
| 2  | 1  | 4  | 3  | 4  | 2  |
| 4  | 4  | 3  | 3  | 3  | 2  |



|    |   |   |    |   |    |
|----|---|---|----|---|----|
| 0  | 1 | 4 | 1  | 1 | 1  |
| 4  | 4 | 4 | 4  | 3 | 4  |
| 4  | 4 | 4 | 4  | 3 | 3  |
| 2  | 3 | 3 | 2  | 2 | 2  |
| 4  | 4 | 4 | 4  | 4 | 3  |
| 1  | 1 | 3 | 3  | 2 | 2  |
| 4  | 4 | 4 | 4  | 4 | 4  |
| 4  | 4 | 4 | 4  | 1 | 4  |
| 99 | 3 | 3 | 2  | 1 | 99 |
| 2  | 2 | 3 | 2  | 2 | 2  |
| 3  | 2 | 1 | 2  | 1 | 2  |
| 4  | 4 | 3 | 2  | 2 | 3  |
| 4  | 4 | 3 | 3  | 3 | 3  |
| 0  | 0 | 2 | 2  | 3 | 3  |
| 4  | 4 | 3 | 3  | 3 | 2  |
| 4  | 4 | 3 | 3  | 2 | 1  |
| 3  | 1 | 2 | 1  | 1 | 3  |
| 3  | 2 | 3 | 1  | 1 | 1  |
| 4  | 2 | 3 | 3  | 3 | 1  |
| 4  | 3 | 3 | 3  | 2 | 1  |
| 3  | 3 | 4 | 4  | 3 | 3  |
| 4  | 4 | 2 | 2  | 2 | 3  |
| 1  | 2 | 3 | 3  | 3 | 2  |
| 3  | 3 | 3 | 3  | 3 | 3  |
| 4  | 4 | 2 | 2  | 1 | 3  |
| 3  | 0 | 3 | 3  | 2 | 2  |
| 1  | 1 | 3 | 3  | 3 | 3  |
| 4  | 3 | 4 | 4  | 4 | 4  |
| 4  | 3 | 3 | 2  | 2 | 2  |
| 4  | 4 | 2 | 3  | 3 | 3  |
| 4  | 4 | 3 | 3  | 2 | 3  |
| 3  | 2 | 4 | 4  | 4 | 1  |
| 4  | 4 | 3 | 3  | 3 | 3  |
| 3  | 4 | 2 | 3  | 4 | 1  |
| 4  | 4 | 3 | 2  | 1 | 3  |
| 3  | 2 | 3 | 3  | 1 | 2  |
| 3  | 3 | 3 | 1  | 1 | 1  |
| 4  | 4 | 3 | 3  | 2 | 3  |
| 4  | 4 | 4 | 4  | 4 | 4  |
| 0  | 0 | 3 | 3  | 3 | 3  |
| 2  | 2 | 2 | 2  | 2 | 2  |
| 4  | 4 | 3 | 3  | 3 | 3  |
| 4  | 4 | 4 | 3  | 3 | 2  |
| 2  | 2 | 3 | 3  | 3 | 3  |
| 2  | 2 | 3 | 99 | 3 | 3  |
| 4  | 4 | 4 | 4  | 4 | 3  |
| 4  | 4 | 4 | 4  | 4 | 3  |
| 4  | 4 | 3 | 3  | 4 | 3  |

|    |    |    |    |    |    |
|----|----|----|----|----|----|
| 99 | 99 | 3  | 3  | 2  | 3  |
| 1  | 1  | 2  | 2  | 3  | 2  |
| 4  | 4  | 3  | 3  | 2  | 2  |
| 4  | 4  | 4  | 4  | 4  | 1  |
| 0  | 3  | 3  | 3  | 3  | 2  |
| 2  | 2  | 3  | 2  | 3  | 2  |
| 2  | 2  | 3  | 3  | 2  | 3  |
| 4  | 4  | 3  | 1  | 1  | 1  |
| 4  | 4  | 3  | 4  | 4  | 4  |
| 4  | 99 | 3  | 3  | 3  | 99 |
| 4  | 4  | 3  | 99 | 99 | 1  |
| 4  | 4  | 3  | 3  | 3  | 3  |
| 4  | 4  | 1  | 1  | 2  | 1  |
| 4  | 4  | 4  | 4  | 4  | 4  |
| 2  | 3  | 3  | 3  | 2  | 3  |
| 3  | 4  | 1  | 1  | 4  | 3  |
| 2  | 2  | 4  | 3  | 3  | 2  |
| 4  | 4  | 3  | 3  | 3  | 3  |
| 4  | 4  | 99 | 99 | 99 | 2  |
| 99 | 99 | 99 | 99 | 99 | 99 |
| 3  | 4  | 3  | 3  | 2  | 2  |
| 4  | 4  | 3  | 3  | 3  | 2  |
| 3  | 4  | 3  | 3  | 3  | 2  |
| 4  | 4  | 3  | 3  | 3  | 3  |
| 4  | 3  | 3  | 3  | 3  | 3  |
| 4  | 4  | 3  | 2  | 3  | 2  |
| 3  | 3  | 3  | 1  | 2  | 2  |
| 4  | 4  | 3  | 2  | 2  | 3  |
| 4  | 4  | 3  | 3  | 3  | 3  |
| 3  | 4  | 3  | 3  | 3  | 3  |
| 4  | 2  | 3  | 3  | 2  | 2  |
| 4  | 4  | 3  | 4  | 4  | 4  |
| 4  | 4  | 3  | 4  | 4  | 2  |
| 4  | 4  | 3  | 3  | 3  | 2  |
| 4  | 4  | 4  | 4  | 4  | 2  |
| 4  | 3  | 3  | 3  | 1  | 2  |
| 4  | 4  | 3  | 3  | 3  | 3  |
| 4  | 4  | 2  | 2  | 2  | 3  |
| 4  | 4  | 2  | 2  | 2  | 3  |
| 2  | 2  | 2  | 3  | 2  | 2  |
| 4  | 4  | 4  | 4  | 4  | 2  |
| 4  | 4  | 2  | 4  | 4  | 3  |
| 4  | 4  | 3  | 3  | 3  | 2  |
| 4  | 3  | 4  | 3  | 3  | 4  |
| 4  | 4  | 3  | 3  | 3  | 2  |
| 4  | 4  | 3  | 2  | 3  | 3  |
| 2  | 2  | 4  | 1  | 1  | 2  |
| 99 | 1  | 2  | 3  | 1  | 2  |

|   |   |   |   |    |    |
|---|---|---|---|----|----|
| 3 | 2 | 2 | 2 | 3  | 3  |
| 4 | 4 | 2 | 3 | 3  | 3  |
| 0 | 0 | 2 | 2 | 2  | 3  |
| 4 | 4 | 3 | 2 | 1  | 1  |
| 3 | 3 | 3 | 3 | 2  | 2  |
| 4 | 4 | 3 | 3 | 3  | 3  |
| 3 | 2 | 2 | 1 | 1  | 1  |
| 3 | 2 | 2 | 3 | 3  | 2  |
| 4 | 4 | 4 | 4 | 4  | 4  |
| 4 | 4 | 3 | 3 | 2  | 1  |
| 2 | 0 | 4 | 4 | 1  | 1  |
| 0 | 0 | 2 | 2 | 1  | 3  |
| 4 | 4 | 2 | 4 | 2  | 3  |
| 4 | 3 | 4 | 4 | 4  | 4  |
| 4 | 4 | 4 | 4 | 4  | 3  |
| 3 | 3 | 3 | 3 | 99 | 99 |
| 4 | 4 | 3 | 3 | 3  | 2  |
| 4 | 4 | 3 | 3 | 2  | 3  |
| 4 | 3 | 3 | 2 | 3  | 3  |
| 3 | 4 | 2 | 3 | 99 | 99 |
| 4 | 4 | 3 | 3 | 4  | 4  |
| 4 | 4 | 3 | 3 | 3  | 3  |
| 4 | 4 | 4 | 4 | 4  | 3  |
| 4 | 4 | 2 | 3 | 3  | 3  |
| 3 | 3 | 2 | 3 | 1  | 2  |
| 0 | 0 | 3 | 2 | 2  | 3  |
| 3 | 4 | 3 | 3 | 3  | 3  |
| 0 | 0 | 2 | 3 | 3  | 2  |
| 2 | 1 | 3 | 3 | 3  | 3  |
| 4 | 3 | 2 | 2 | 2  | 3  |
| 4 | 4 | 2 | 3 | 2  | 2  |
| 4 | 3 | 3 | 3 | 3  | 3  |
| 2 | 2 | 3 | 2 | 2  | 3  |
| 4 | 4 | 3 | 3 | 3  | 3  |
| 4 | 4 | 4 | 4 | 4  | 3  |
| 2 | 0 | 4 | 4 | 4  | 4  |
| 3 | 4 | 4 | 3 | 3  | 2  |
| 4 | 4 | 2 | 2 | 1  | 1  |
| 2 | 2 | 1 | 1 | 1  | 1  |
| 3 | 3 | 3 | 2 | 1  | 3  |
| 4 | 4 | 2 | 2 | 2  | 1  |
| 4 | 4 | 1 | 1 | 1  | 1  |
| 4 | 4 | 4 | 4 | 4  | 4  |
| 3 | 3 | 3 | 3 | 3  | 2  |
| 2 | 1 | 2 | 2 | 1  | 2  |
| 2 | 2 | 4 | 3 | 3  | 2  |
| 2 | 2 | 3 | 2 | 2  | 3  |
| 4 | 4 | 3 | 4 | 1  | 1  |

|    |    |    |    |    |    |
|----|----|----|----|----|----|
| 4  | 3  | 2  | 3  | 1  | 3  |
| 4  | 4  | 3  | 3  | 3  | 2  |
| 4  | 4  | 2  | 2  | 3  | 3  |
| 4  | 4  | 3  | 4  | 3  | 4  |
| 4  | 4  | 3  | 4  | 3  | 3  |
| 3  | 3  | 2  | 2  | 2  | 3  |
| 4  | 4  | 3  | 3  | 3  | 3  |
| 4  | 4  | 3  | 3  | 3  | 99 |
| 4  | 4  | 4  | 4  | 4  | 3  |
| 4  | 4  | 4  | 4  | 3  | 3  |
| 4  | 3  | 4  | 4  | 2  | 2  |
| 3  | 99 | 99 | 3  | 2  | 3  |
| 4  | 4  | 4  | 4  | 4  | 3  |
| 4  | 4  | 3  | 3  | 3  | 3  |
| 4  | 4  | 3  | 3  | 3  | 3  |
| 4  | 2  | 2  | 2  | 3  | 3  |
| 4  | 4  | 4  | 4  | 3  | 1  |
| 4  | 4  | 2  | 3  | 2  | 3  |
| 4  | 4  | 3  | 3  | 4  | 3  |
| 4  | 4  | 4  | 4  | 3  | 4  |
| 4  | 4  | 4  | 3  | 3  | 3  |
| 3  | 3  | 4  | 3  | 3  | 4  |
| 4  | 4  | 4  | 4  | 4  | 3  |
| 99 | 2  | 99 | 1  | 1  | 99 |
| 4  | 4  | 4  | 4  | 4  | 4  |
| 3  | 3  | 3  | 3  | 2  | 3  |
| 4  | 4  | 2  | 3  | 3  | 3  |
| 2  | 1  | 3  | 3  | 3  | 3  |
| 4  | 4  | 3  | 3  | 3  | 4  |
| 2  | 4  | 3  | 4  | 4  | 4  |
| 4  | 4  | 3  | 3  | 3  | 3  |
| 4  | 4  | 3  | 3  | 2  | 3  |
| 4  | 4  | 3  | 4  | 4  | 4  |
| 4  | 4  | 2  | 2  | 3  | 4  |
| 3  | 3  | 2  | 2  | 2  | 2  |
| 2  | 3  | 3  | 3  | 1  | 3  |
| 99 | 99 | 99 | 99 | 99 | 99 |
| 4  | 3  | 3  | 3  | 3  | 3  |
| 4  | 4  | 3  | 3  | 2  | 3  |
| 3  | 3  | 4  | 4  | 2  | 2  |
| 4  | 4  | 3  | 4  | 4  | 4  |
| 4  | 4  | 4  | 4  | 4  | 4  |
| 3  | 3  | 3  | 3  | 3  | 3  |
| 4  | 4  | 4  | 4  | 4  | 3  |
| 4  | 4  | 4  | 4  | 4  | 4  |
| 4  | 4  | 3  | 3  | 2  | 3  |
| 4  | 4  | 3  | 3  | 4  | 3  |
| 3  | 2  | 1  | 2  | 3  | 3  |

|    |   |   |   |   |   |
|----|---|---|---|---|---|
| 3  | 4 | 2 | 2 | 1 | 1 |
| 4  | 4 | 3 | 3 | 3 | 3 |
| 2  | 3 | 2 | 2 | 1 | 1 |
| 2  | 4 | 2 | 2 | 2 | 1 |
| 4  | 4 | 2 | 2 | 3 | 3 |
| 4  | 4 | 3 | 4 | 4 | 3 |
| 4  | 4 | 3 | 3 | 3 | 3 |
| 4  | 4 | 4 | 3 | 3 | 2 |
| 4  | 3 | 4 | 4 | 2 | 3 |
| 4  | 4 | 3 | 3 | 3 | 2 |
| 4  | 4 | 3 | 3 | 3 | 4 |
| 4  | 4 | 3 | 2 | 3 | 2 |
| 4  | 4 | 2 | 2 | 2 | 2 |
| 4  | 4 | 4 | 4 | 4 | 3 |
| 2  | 3 | 3 | 3 | 2 | 2 |
| 4  | 4 | 3 | 3 | 3 | 3 |
| 4  | 3 | 2 | 4 | 4 | 4 |
| 4  | 4 | 3 | 3 | 3 | 3 |
| 4  | 3 | 3 | 3 | 2 | 3 |
| 2  | 2 | 3 | 3 | 2 | 2 |
| 4  | 4 | 2 | 3 | 3 | 3 |
| 4  | 4 | 4 | 4 | 2 | 2 |
| 4  | 4 | 4 | 2 | 3 | 2 |
| 4  | 4 | 4 | 2 | 4 | 3 |
| 0  | 0 | 1 | 1 | 1 | 1 |
| 3  | 4 | 3 | 3 | 3 | 2 |
| 2  | 2 | 3 | 3 | 4 | 4 |
| 4  | 4 | 4 | 4 | 3 | 3 |
| 4  | 4 | 3 | 3 | 3 | 3 |
| 4  | 4 | 3 | 3 | 3 | 3 |
| 3  | 3 | 3 | 3 | 3 | 1 |
| 4  | 4 | 2 | 3 | 2 | 2 |
| 3  | 3 | 3 | 4 | 3 | 3 |
| 4  | 4 | 2 | 2 | 2 | 2 |
| 4  | 4 | 3 | 3 | 3 | 2 |
| 4  | 4 | 3 | 3 | 3 | 2 |
| 4  | 3 | 2 | 2 | 1 | 2 |
| 3  | 2 | 3 | 2 | 3 | 3 |
| 4  | 4 | 3 | 3 | 3 | 3 |
| 4  | 4 | 4 | 3 | 3 | 3 |
| 4  | 4 | 3 | 2 | 3 | 3 |
| 4  | 4 | 2 | 1 | 1 | 1 |
| 4  | 4 | 3 | 2 | 2 | 3 |
| 4  | 4 | 3 | 3 | 3 | 3 |
| 3  | 2 | 2 | 2 | 3 | 1 |
| 99 | 2 | 3 | 1 | 2 | 2 |
| 4  | 4 | 3 | 4 | 3 | 3 |
| 3  | 3 | 3 | 3 | 3 | 4 |

|    |    |   |   |    |   |
|----|----|---|---|----|---|
| 4  | 4  | 4 | 4 | 4  | 3 |
| 2  | 2  | 3 | 2 | 2  | 2 |
| 3  | 2  | 4 | 3 | 4  | 2 |
| 4  | 4  | 2 | 3 | 2  | 3 |
| 4  | 4  | 4 | 4 | 4  | 4 |
| 4  | 4  | 3 | 3 | 4  | 4 |
| 4  | 4  | 4 | 3 | 3  | 2 |
| 3  | 3  | 3 | 3 | 3  | 3 |
| 4  | 4  | 4 | 4 | 4  | 4 |
| 4  | 4  | 3 | 2 | 3  | 3 |
| 4  | 4  | 4 | 4 | 4  | 4 |
| 4  | 4  | 4 | 3 | 4  | 4 |
| 4  | 1  | 4 | 4 | 4  | 4 |
| 4  | 3  | 2 | 3 | 2  | 3 |
| 4  | 4  | 4 | 4 | 4  | 4 |
| 4  | 3  | 3 | 4 | 4  | 4 |
| 4  | 3  | 4 | 4 | 4  | 4 |
| 4  | 4  | 4 | 3 | 4  | 4 |
| 4  | 4  | 3 | 3 | 3  | 3 |
| 1  | 1  | 4 | 3 | 4  | 4 |
| 3  | 0  | 2 | 3 | 4  | 3 |
| 4  | 3  | 3 | 3 | 3  | 4 |
| 1  | 0  | 1 | 1 | 99 | 3 |
| 4  | 4  | 2 | 3 | 3  | 3 |
| 4  | 4  | 3 | 4 | 4  | 4 |
| 4  | 4  | 4 | 4 | 4  | 4 |
| 4  | 4  | 4 | 4 | 4  | 4 |
| 4  | 4  | 3 | 3 | 4  | 4 |
| 4  | 4  | 3 | 3 | 3  | 3 |
| 4  | 3  | 3 | 3 | 2  | 3 |
| 4  | 4  | 4 | 4 | 4  | 4 |
| 4  | 4  | 3 | 4 | 3  | 4 |
| 4  | 4  | 2 | 2 | 3  | 3 |
| 1  | 1  | 2 | 3 | 2  | 3 |
| 4  | 4  | 4 | 3 | 4  | 2 |
| 1  | 3  | 4 | 4 | 4  | 3 |
| 3  | 4  | 3 | 2 | 1  | 2 |
| 4  | 4  | 3 | 2 | 2  | 3 |
| 4  | 4  | 4 | 4 | 4  | 3 |
| 4  | 4  | 3 | 3 | 3  | 3 |
| 4  | 4  | 4 | 4 | 3  | 3 |
| 99 | 99 | 4 | 4 | 4  | 4 |
| 2  | 3  | 3 | 3 | 3  | 3 |
| 4  | 4  | 4 | 4 | 4  | 4 |
| 3  | 4  | 3 | 3 | 3  | 4 |
| 4  | 4  | 4 | 3 | 3  | 3 |
| 4  | 4  | 3 | 3 | 3  | 3 |
| 4  | 4  | 3 | 3 | 3  | 3 |

|    |    |    |    |    |    |
|----|----|----|----|----|----|
| 4  | 4  | 3  | 4  | 3  | 2  |
| 4  | 4  | 2  | 2  | 3  | 2  |
| 4  | 4  | 3  | 3  | 3  | 3  |
| 4  | 4  | 4  | 4  | 4  | 4  |
| 1  | 1  | 3  | 3  | 3  | 3  |
| 99 | 99 | 99 | 99 | 99 | 99 |
| 4  | 4  | 3  | 3  | 3  | 3  |
| 4  | 4  | 3  | 3  | 4  | 4  |
| 4  | 4  | 3  | 3  | 3  | 3  |
| 4  | 4  | 4  | 4  | 4  | 4  |
| 4  | 4  | 3  | 3  | 4  | 4  |
| 4  | 4  | 3  | 3  | 3  | 2  |
| 4  | 99 | 3  | 3  | 3  | 3  |
| 0  | 0  | 2  | 2  | 3  | 3  |
| 4  | 4  | 4  | 4  | 4  | 4  |
| 4  | 4  | 3  | 3  | 3  | 2  |
| 4  | 4  | 3  | 3  | 3  | 3  |
| 4  | 4  | 4  | 4  | 4  | 4  |
| 4  | 4  | 3  | 3  | 3  | 3  |
| 3  | 4  | 3  | 2  | 2  | 2  |
| 4  | 4  | 3  | 3  | 3  | 3  |
| 99 | 99 | 3  | 3  | 3  | 3  |
| 4  | 4  | 3  | 3  | 3  | 3  |
| 3  | 3  | 4  | 3  | 3  | 3  |
| 4  | 4  | 3  | 3  | 3  | 4  |
| 0  | 0  | 2  | 2  | 2  | 2  |
| 3  | 0  | 2  | 3  | 3  | 3  |
| 99 | 99 | 99 | 99 | 99 | 99 |
| 4  | 3  | 2  | 2  | 3  | 3  |
| 4  | 3  | 3  | 2  | 3  | 3  |
| 4  | 4  | 3  | 3  | 3  | 2  |
| 2  | 0  | 4  | 4  | 3  | 2  |
| 4  | 4  | 2  | 1  | 1  | 2  |
| 4  | 4  | 3  | 3  | 3  | 3  |
| 4  | 4  | 3  | 3  | 4  | 3  |
| 4  | 4  | 3  | 4  | 3  | 3  |
| 99 | 99 | 99 | 99 | 99 | 99 |
| 3  | 2  | 3  | 3  | 3  | 3  |
| 4  | 4  | 99 | 3  | 3  | 3  |
| 4  | 4  | 3  | 3  | 2  | 3  |
| 3  | 3  | 3  | 2  | 2  | 2  |
| 4  | 4  | 3  | 3  | 4  | 4  |
| 4  | 4  | 3  | 4  | 4  | 4  |
| 4  | 4  | 2  | 3  | 3  | 3  |
| 4  | 4  | 3  | 3  | 3  | 3  |
| 4  | 4  | 4  | 4  | 4  | 4  |
| 3  | 4  | 3  | 4  | 4  | 3  |
| 4  | 4  | 2  | 3  | 3  | 4  |

|    |    |    |    |    |    |
|----|----|----|----|----|----|
| 3  | 3  | 3  | 3  | 99 | 4  |
| 99 | 4  | 2  | 3  | 4  | 3  |
| 3  | 3  | 3  | 3  | 4  | 4  |
| 4  | 99 | 3  | 3  | 3  | 3  |
| 3  | 2  | 3  | 3  | 3  | 4  |
| 4  | 4  | 3  | 4  | 3  | 3  |
| 4  | 4  | 3  | 4  | 3  | 3  |
| 4  | 4  | 3  | 4  | 3  | 2  |
| 4  | 4  | 3  | 3  | 3  | 3  |
| 4  | 4  | 1  | 1  | 1  | 1  |
| 4  | 99 | 3  | 4  | 4  | 4  |
| 4  | 4  | 4  | 4  | 4  | 4  |
| 4  | 4  | 4  | 4  | 4  | 2  |
| 4  | 4  | 3  | 2  | 2  | 3  |
| 4  | 4  | 3  | 3  | 3  | 3  |
| 4  | 4  | 1  | 1  | 1  | 1  |
| 4  | 3  | 4  | 4  | 4  | 4  |
| 0  | 1  | 4  | 3  | 3  | 2  |
| 4  | 3  | 3  | 3  | 4  | 3  |
| 4  | 4  | 2  | 4  | 4  | 4  |
| 4  | 4  | 3  | 4  | 4  | 3  |
| 3  | 2  | 4  | 3  | 3  | 2  |
| 4  | 4  | 2  | 99 | 99 | 99 |
| 3  | 3  | 3  | 2  | 3  | 3  |
| 4  | 4  | 3  | 1  | 3  | 3  |
| 4  | 4  | 3  | 3  | 3  | 2  |
| 4  | 4  | 4  | 4  | 4  | 4  |
| 4  | 4  | 2  | 3  | 3  | 3  |
| 4  | 4  | 3  | 3  | 3  | 3  |
| 4  | 4  | 3  | 3  | 3  | 3  |
| 3  | 3  | 3  | 3  | 3  | 3  |
| 4  | 4  | 3  | 3  | 3  | 3  |
| 4  | 4  | 4  | 4  | 4  | 4  |
| 2  | 3  | 3  | 3  | 4  | 3  |
| 4  | 3  | 3  | 3  | 3  | 3  |
| 99 | 2  | 3  | 3  | 3  | 2  |
| 4  | 4  | 3  | 3  | 3  | 3  |
| 99 | 99 | 99 | 99 | 99 | 99 |
| 3  | 3  | 3  | 3  | 3  | 3  |
| 3  | 4  | 3  | 3  | 4  | 1  |
| 3  | 2  | 3  | 3  | 3  | 2  |
| 4  | 99 | 3  | 2  | 2  | 1  |
| 2  | 2  | 3  | 4  | 2  | 3  |
| 4  | 3  | 3  | 3  | 3  | 3  |
| 3  | 2  | 3  | 2  | 1  | 2  |
| 4  | 3  | 3  | 3  | 3  | 3  |
| 0  | 0  | 4  | 4  | 4  | 3  |
| 4  | 3  | 4  | 4  | 3  | 2  |



|    |    |    |    |    |    |
|----|----|----|----|----|----|
| 99 | 3  | 99 | 99 | 99 | 99 |
| 1  | 3  | 3  | 3  | 3  | 3  |
| 4  | 4  | 4  | 4  | 4  | 4  |
| 99 | 99 | 99 | 99 | 4  | 4  |
| 4  | 4  | 4  | 4  | 3  | 3  |
| 4  | 2  | 3  | 3  | 3  | 2  |
| 4  | 4  | 3  | 3  | 4  | 4  |
| 3  | 2  | 2  | 3  | 3  | 3  |
| 3  | 2  | 2  | 3  | 3  | 3  |
| 4  | 4  | 4  | 4  | 3  | 3  |
| 3  | 3  | 3  | 3  | 3  | 3  |
| 4  | 4  | 3  | 3  | 3  | 3  |
| 4  | 4  | 4  | 4  | 3  | 3  |
| 2  | 1  | 3  | 3  | 3  | 2  |
| 3  | 4  | 3  | 3  | 2  | 3  |
| 3  | 3  | 3  | 3  | 2  | 2  |
| 4  | 4  | 4  | 4  | 4  | 4  |
| 4  | 2  | 4  | 2  | 2  | 3  |
| 4  | 4  | 2  | 2  | 2  | 1  |
| 4  | 4  | 3  | 2  | 3  | 3  |
| 4  | 4  | 3  | 3  | 4  | 3  |
| 4  | 4  | 4  | 3  | 2  | 3  |
| 99 | 99 | 99 | 99 | 99 | 99 |
| 4  | 3  | 3  | 3  | 4  | 3  |
| 0  | 0  | 3  | 3  | 2  | 3  |
| 4  | 4  | 3  | 3  | 3  | 3  |
| 99 | 99 | 99 | 99 | 99 | 99 |
| 4  | 4  | 3  | 3  | 2  | 3  |
| 3  | 1  | 2  | 2  | 3  | 3  |
| 0  | 0  | 2  | 3  | 3  | 3  |
| 2  | 3  | 4  | 4  | 4  | 2  |
| 3  | 4  | 4  | 4  | 3  | 4  |
| 2  | 3  | 4  | 4  | 4  | 4  |
| 2  | 2  | 2  | 2  | 2  | 99 |
| 4  | 4  | 3  | 4  | 4  | 4  |
| 0  | 0  | 4  | 4  | 4  | 4  |
| 3  | 3  | 4  | 3  | 4  | 3  |
| 4  | 4  | 2  | 3  | 3  | 3  |
| 3  | 3  | 4  | 1  | 4  | 3  |
| 0  | 4  | 3  | 1  | 1  | 1  |
| 4  | 4  | 3  | 3  | 4  | 4  |
| 4  | 3  | 3  | 3  | 3  | 3  |
| 4  | 4  | 3  | 2  | 4  | 3  |
| 4  | 4  | 4  | 4  | 4  | 4  |
| 3  | 3  | 3  | 3  | 3  | 3  |
| 0  | 0  | 4  | 4  | 4  | 4  |
| 99 | 99 | 99 | 99 | 99 | 99 |
| 4  | 3  | 2  | 2  | 1  | 3  |

|    |    |    |    |    |   |
|----|----|----|----|----|---|
| 4  | 2  | 2  | 3  | 4  | 3 |
| 4  | 4  | 4  | 4  | 4  | 2 |
| 0  | 0  | 2  | 3  | 3  | 3 |
| 4  | 3  | 3  | 4  | 3  | 4 |
| 4  | 4  | 3  | 4  | 3  | 4 |
| 4  | 4  | 4  | 4  | 4  | 4 |
| 4  | 4  | 4  | 4  | 4  | 4 |
| 4  | 4  | 3  | 3  | 4  | 2 |
| 4  | 4  | 2  | 3  | 3  | 2 |
| 4  | 4  | 3  | 4  | 3  | 4 |
| 4  | 4  | 3  | 3  | 3  | 4 |
| 4  | 99 | 2  | 3  | 3  | 3 |
| 4  | 4  | 3  | 3  | 4  | 4 |
| 4  | 0  | 4  | 4  | 4  | 2 |
| 4  | 4  | 3  | 3  | 3  | 3 |
| 4  | 4  | 3  | 3  | 99 | 3 |
| 4  | 4  | 4  | 4  | 3  | 2 |
| 3  | 3  | 3  | 3  | 3  | 2 |
| 4  | 4  | 3  | 3  | 3  | 2 |
| 4  | 4  | 4  | 4  | 4  | 1 |
| 2  | 3  | 3  | 2  | 1  | 2 |
| 4  | 4  | 3  | 3  | 3  | 3 |
| 4  | 4  | 3  | 2  | 2  | 2 |
| 3  | 4  | 2  | 99 | 2  | 3 |
| 3  | 3  | 3  | 2  | 3  | 4 |
| 4  | 4  | 3  | 2  | 1  | 2 |
| 3  | 4  | 3  | 4  | 3  | 3 |
| 4  | 4  | 2  | 3  | 4  | 4 |
| 4  | 4  | 3  | 3  | 3  | 3 |
| 2  | 2  | 2  | 3  | 2  | 3 |
| 4  | 4  | 3  | 3  | 3  | 3 |
| 4  | 2  | 3  | 4  | 4  | 1 |
| 4  | 4  | 3  | 3  | 3  | 3 |
| 4  | 4  | 4  | 3  | 3  | 2 |
| 4  | 4  | 3  | 4  | 4  | 3 |
| 4  | 3  | 3  | 4  | 4  | 4 |
| 4  | 3  | 3  | 4  | 4  | 4 |
| 3  | 3  | 4  | 4  | 4  | 4 |
| 99 | 99 | 99 | 99 | 99 | 2 |
| 4  | 4  | 3  | 3  | 3  | 3 |
| 4  | 4  | 4  | 4  | 4  | 4 |
| 4  | 4  | 3  | 4  | 4  | 3 |
| 4  | 3  | 3  | 3  | 2  | 3 |
| 3  | 3  | 3  | 3  | 3  | 3 |
| 1  | 1  | 3  | 3  | 2  | 2 |
| 4  | 4  | 2  | 3  | 3  | 3 |
| 4  | 4  | 4  | 4  | 3  | 3 |
| 4  | 3  | 3  | 2  | 1  | 2 |

|    |    |    |    |    |    |
|----|----|----|----|----|----|
| 4  | 3  | 3  | 3  | 3  | 2  |
| 4  | 4  | 2  | 3  | 3  | 2  |
| 4  | 4  | 3  | 3  | 3  | 3  |
| 4  | 4  | 4  | 3  | 3  | 3  |
| 4  | 4  | 4  | 4  | 4  | 4  |
| 4  | 4  | 4  | 3  | 3  | 3  |
| 4  | 4  | 3  | 3  | 3  | 2  |
| 3  | 3  | 99 | 2  | 2  | 99 |
| 3  | 3  | 3  | 3  | 3  | 2  |
| 4  | 4  | 3  | 2  | 3  | 1  |
| 1  | 1  | 1  | 1  | 1  | 2  |
| 2  | 2  | 4  | 3  | 4  | 4  |
| 4  | 4  | 3  | 2  | 2  | 2  |
| 3  | 4  | 2  | 3  | 3  | 3  |
| 4  | 4  | 3  | 3  | 3  | 2  |
| 3  | 4  | 2  | 1  | 1  | 1  |
| 4  | 4  | 4  | 4  | 4  | 3  |
| 4  | 3  | 2  | 3  | 2  | 2  |
| 3  | 4  | 3  | 4  | 4  | 2  |
| 4  | 4  | 3  | 3  | 3  | 3  |
| 0  | 0  | 3  | 2  | 2  | 3  |
| 4  | 4  | 3  | 3  | 3  | 3  |
| 2  | 3  | 3  | 3  | 3  | 4  |
| 4  | 4  | 3  | 2  | 3  | 3  |
| 4  | 4  | 3  | 3  | 4  | 4  |
| 4  | 4  | 3  | 3  | 3  | 3  |
| 99 | 99 | 3  | 3  | 3  | 3  |
| 4  | 4  | 2  | 3  | 3  | 3  |
| 4  | 2  | 2  | 3  | 99 | 2  |
| 4  | 4  | 3  | 2  | 2  | 2  |
| 3  | 4  | 3  | 4  | 4  | 1  |
| 4  | 4  | 3  | 3  | 2  | 4  |
| 4  | 4  | 3  | 3  | 3  | 3  |
| 4  | 4  | 3  | 3  | 2  | 2  |
| 2  | 2  | 3  | 3  | 3  | 3  |
| 4  | 4  | 3  | 3  | 3  | 3  |
| 4  | 4  | 3  | 3  | 3  | 3  |
| 4  | 3  | 3  | 3  | 3  | 4  |
| 4  | 3  | 3  | 3  | 2  | 2  |
| 4  | 4  | 4  | 3  | 4  | 2  |
| 4  | 4  | 3  | 3  | 3  | 4  |
| 99 | 99 | 99 | 99 | 99 | 99 |
| 4  | 4  | 4  | 4  | 4  | 4  |
| 4  | 3  | 2  | 3  | 3  | 3  |
| 4  | 4  | 3  | 3  | 3  | 3  |
| 4  | 4  | 4  | 4  | 4  | 4  |
| 4  | 4  | 3  | 4  | 2  | 3  |
| 2  | 2  | 3  | 3  | 2  | 2  |

|   |   |    |    |   |    |
|---|---|----|----|---|----|
| 4 | 4 | 4  | 4  | 4 | 2  |
| 4 | 3 | 3  | 3  | 3 | 2  |
| 4 | 4 | 4  | 4  | 3 | 4  |
| 4 | 1 | 3  | 3  | 3 | 3  |
| 4 | 3 | 3  | 3  | 3 | 3  |
| 4 | 4 | 3  | 3  | 3 | 3  |
| 4 | 1 | 2  | 2  | 3 | 2  |
| 0 | 0 | 1  | 1  | 1 | 3  |
| 4 | 4 | 4  | 3  | 4 | 3  |
| 4 | 3 | 3  | 3  | 3 | 3  |
| 1 | 2 | 2  | 2  | 3 | 2  |
| 4 | 4 | 3  | 3  | 2 | 3  |
| 4 | 4 | 3  | 4  | 4 | 4  |
| 4 | 2 | 2  | 3  | 3 | 1  |
| 4 | 4 | 3  | 3  | 3 | 3  |
| 4 | 4 | 3  | 3  | 4 | 4  |
| 4 | 4 | 3  | 3  | 3 | 4  |
| 3 | 4 | 99 | 99 | 3 | 3  |
| 4 | 4 | 2  | 2  | 2 | 3  |
| 4 | 4 | 3  | 3  | 3 | 3  |
| 4 | 4 | 4  | 3  | 2 | 3  |
| 3 | 3 | 3  | 3  | 4 | 4  |
| 4 | 4 | 2  | 1  | 1 | 3  |
| 4 | 4 | 4  | 4  | 4 | 3  |
| 4 | 4 | 3  | 4  | 4 | 3  |
| 4 | 4 | 3  | 3  | 3 | 3  |
| 3 | 3 | 4  | 3  | 3 | 2  |
| 4 | 4 | 3  | 4  | 3 | 4  |
| 4 | 4 | 3  | 3  | 3 | 3  |
| 4 | 4 | 3  | 3  | 3 | 4  |
| 3 | 3 | 4  | 4  | 4 | 4  |
| 4 | 4 | 2  | 2  | 4 | 4  |
| 4 | 4 | 2  | 4  | 1 | 2  |
| 3 | 3 | 3  | 3  | 3 | 3  |
| 4 | 4 | 4  | 4  | 4 | 4  |
| 4 | 4 | 3  | 3  | 4 | 3  |
| 2 | 4 | 4  | 3  | 4 | 4  |
| 4 | 4 | 4  | 4  | 4 | 3  |
| 3 | 4 | 3  | 3  | 3 | 99 |
| 4 | 4 | 3  | 3  | 3 | 3  |
| 2 | 4 | 4  | 4  | 4 | 2  |
| 4 | 4 | 3  | 4  | 2 | 99 |
| 4 | 4 | 4  | 4  | 4 | 4  |
| 4 | 4 | 3  | 3  | 3 | 2  |
| 4 | 4 | 3  | 3  | 3 | 2  |
| 2 | 2 | 4  | 3  | 3 | 2  |
| 4 | 4 | 4  | 4  | 3 | 3  |
| 4 | 3 | 2  | 3  | 2 | 2  |

|    |    |    |    |   |    |
|----|----|----|----|---|----|
| 4  | 4  | 3  | 4  | 3 | 4  |
| 4  | 4  | 1  | 1  | 1 | 1  |
| 4  | 4  | 3  | 4  | 4 | 3  |
| 4  | 4  | 3  | 3  | 3 | 4  |
| 3  | 4  | 3  | 3  | 2 | 3  |
| 4  | 3  | 1  | 1  | 1 | 3  |
| 4  | 4  | 3  | 3  | 3 | 3  |
| 4  | 0  | 2  | 2  | 1 | 1  |
| 4  | 4  | 3  | 3  | 3 | 3  |
| 4  | 4  | 2  | 3  | 2 | 4  |
| 4  | 4  | 3  | 3  | 3 | 3  |
| 2  | 2  | 2  | 4  | 2 | 3  |
| 4  | 4  | 2  | 2  | 3 | 4  |
| 3  | 4  | 4  | 1  | 3 | 3  |
| 4  | 4  | 3  | 3  | 3 | 3  |
| 4  | 4  | 4  | 1  | 4 | 3  |
| 4  | 4  | 4  | 2  | 4 | 3  |
| 4  | 3  | 3  | 3  | 3 | 3  |
| 99 | 99 | 99 | 99 | 2 | 99 |
| 0  | 0  | 4  | 4  | 4 | 4  |
| 4  | 3  | 3  | 3  | 3 | 2  |
| 4  | 3  | 4  | 3  | 3 | 1  |
| 3  | 3  | 3  | 3  | 3 | 3  |
| 4  | 4  | 1  | 4  | 4 | 4  |
| 4  | 4  | 3  | 4  | 4 | 4  |
| 1  | 2  | 3  | 3  | 3 | 3  |
| 4  | 4  | 3  | 3  | 3 | 2  |
| 4  | 4  | 2  | 3  | 4 | 3  |
| 4  | 4  | 4  | 4  | 4 | 3  |
| 4  | 4  | 2  | 3  | 4 | 4  |
| 0  | 0  | 1  | 1  | 1 | 1  |
| 4  | 99 | 3  | 2  | 3 | 2  |
| 4  | 4  | 4  | 4  | 4 | 3  |
| 4  | 4  | 3  | 3  | 4 | 4  |
| 4  | 4  | 3  | 3  | 4 | 4  |
| 4  | 4  | 3  | 3  | 2 | 4  |
| 4  | 4  | 3  | 4  | 3 | 3  |
| 4  | 4  | 4  | 4  | 4 | 2  |
| 1  | 1  | 4  | 4  | 3 | 4  |
| 4  | 4  | 3  | 3  | 3 | 3  |
| 4  | 4  | 4  | 3  | 3 | 3  |
| 4  | 3  | 4  | 4  | 2 | 99 |
| 2  | 3  | 2  | 3  | 3 | 3  |
| 4  | 4  | 2  | 3  | 3 | 4  |
| 4  | 4  | 3  | 2  | 1 | 3  |
| 4  | 4  | 4  | 4  | 1 | 1  |
| 4  | 4  | 2  | 3  | 3 | 4  |
| 1  | 0  | 2  | 2  | 1 | 1  |

|    |    |    |    |    |    |
|----|----|----|----|----|----|
| 4  | 4  | 3  | 4  | 3  | 3  |
| 4  | 4  | 3  | 3  | 3  | 99 |
| 4  | 4  | 4  | 4  | 4  | 4  |
| 4  | 4  | 3  | 3  | 3  | 2  |
| 4  | 4  | 3  | 3  | 3  | 3  |
| 4  | 4  | 4  | 4  | 4  | 2  |
| 4  | 4  | 4  | 3  | 2  | 2  |
| 4  | 2  | 3  | 4  | 3  | 3  |
| 4  | 3  | 3  | 3  | 3  | 2  |
| 4  | 4  | 2  | 3  | 1  | 99 |
| 99 | 99 | 99 | 99 | 99 | 99 |
| 2  | 1  | 3  | 3  | 3  | 3  |
| 4  | 4  | 3  | 3  | 3  | 2  |
| 4  | 4  | 3  | 3  | 3  | 3  |
| 4  | 4  | 4  | 99 | 3  | 3  |
| 4  | 4  | 3  | 2  | 1  | 3  |
| 4  | 4  | 2  | 3  | 3  | 3  |
| 4  | 4  | 3  | 3  | 3  | 4  |
| 3  | 4  | 2  | 3  | 4  | 4  |
| 1  | 0  | 3  | 3  | 3  | 3  |
| 4  | 4  | 3  | 3  | 3  | 3  |
| 4  | 4  | 4  | 4  | 4  | 3  |
| 4  | 4  | 1  | 1  | 1  | 1  |
| 1  | 0  | 3  | 3  | 3  | 3  |
| 4  | 4  | 4  | 3  | 3  | 4  |
| 2  | 2  | 3  | 1  | 1  | 3  |
| 4  | 4  | 3  | 3  | 3  | 99 |
| 3  | 2  | 3  | 2  | 1  | 2  |
| 4  | 4  | 2  | 2  | 3  | 2  |
| 4  | 4  | 2  | 3  | 2  | 1  |
| 2  | 2  | 3  | 1  | 1  | 1  |
| 2  | 2  | 3  | 2  | 1  | 1  |
| 3  | 2  | 4  | 3  | 4  | 3  |
| 4  | 4  | 3  | 3  | 3  | 2  |
| 4  | 4  | 3  | 3  | 3  | 3  |
| 4  | 4  | 4  | 3  | 3  | 99 |
| 4  | 4  | 2  | 3  | 3  | 3  |
| 4  | 4  | 3  | 4  | 3  | 3  |
| 4  | 4  | 3  | 4  | 4  | 4  |
| 3  | 4  | 3  | 3  | 3  | 4  |
| 4  | 4  | 2  | 2  | 3  | 3  |
| 3  | 3  | 3  | 3  | 3  | 3  |
| 1  | 1  | 3  | 3  | 3  | 3  |
| 4  | 4  | 4  | 4  | 4  | 4  |
| 2  | 2  | 3  | 2  | 1  | 3  |
| 4  | 4  | 2  | 1  | 2  | 2  |
| 4  | 4  | 3  | 3  | 3  | 3  |
| 1  | 3  | 3  | 2  | 1  | 2  |

|    |    |   |    |    |    |
|----|----|---|----|----|----|
| 4  | 4  | 1 | 4  | 1  | 3  |
| 4  | 4  | 2 | 3  | 2  | 2  |
| 4  | 4  | 4 | 2  | 4  | 2  |
| 4  | 3  | 3 | 4  | 2  | 3  |
| 4  | 4  | 3 | 3  | 4  | 2  |
| 2  | 2  | 3 | 3  | 3  | 3  |
| 4  | 4  | 3 | 3  | 3  | 3  |
| 4  | 4  | 3 | 3  | 3  | 3  |
| 0  | 0  | 3 | 3  | 3  | 3  |
| 99 | 3  | 3 | 3  | 3  | 3  |
| 2  | 4  | 3 | 3  | 2  | 2  |
| 4  | 2  | 3 | 3  | 3  | 2  |
| 4  | 4  | 4 | 4  | 3  | 4  |
| 0  | 0  | 2 | 3  | 3  | 3  |
| 99 | 99 | 3 | 1  | 1  | 1  |
| 4  | 4  | 3 | 3  | 4  | 4  |
| 0  | 0  | 3 | 3  | 3  | 2  |
| 3  | 99 | 3 | 99 | 3  | 2  |
| 4  | 4  | 4 | 4  | 1  | 4  |
| 3  | 2  | 3 | 1  | 1  | 2  |
| 0  | 0  | 4 | 4  | 3  | 2  |
| 4  | 4  | 3 | 3  | 3  | 3  |
| 4  | 3  | 3 | 4  | 3  | 3  |
| 4  | 4  | 4 | 1  | 1  | 1  |
| 3  | 3  | 3 | 3  | 2  | 2  |
| 4  | 4  | 3 | 3  | 3  | 3  |
| 4  | 4  | 2 | 3  | 3  | 3  |
| 4  | 4  | 4 | 4  | 2  | 4  |
| 4  | 3  | 3 | 3  | 3  | 2  |
| 3  | 2  | 2 | 3  | 3  | 4  |
| 4  | 3  | 4 | 3  | 3  | 3  |
| 4  | 4  | 3 | 3  | 4  | 4  |
| 4  | 4  | 4 | 2  | 4  | 4  |
| 2  | 3  | 4 | 4  | 3  | 4  |
| 4  | 4  | 3 | 2  | 2  | 3  |
| 4  | 3  | 2 | 2  | 2  | 3  |
| 0  | 4  | 4 | 2  | 4  | 4  |
| 2  | 1  | 2 | 3  | 2  | 3  |
| 3  | 3  | 4 | 3  | 3  | 1  |
| 4  | 4  | 3 | 3  | 99 | 99 |
| 4  | 4  | 4 | 3  | 3  | 2  |
| 4  | 4  | 3 | 4  | 2  | 1  |
| 4  | 4  | 4 | 4  | 4  | 3  |
| 3  | 4  | 4 | 3  | 3  | 3  |
| 3  | 3  | 4 | 3  | 3  | 2  |
| 4  | 4  | 3 | 3  | 3  | 3  |
| 99 | 99 | 3 | 2  | 3  | 2  |
| 4  | 4  | 3 | 3  | 3  | 2  |

|    |    |   |   |   |    |
|----|----|---|---|---|----|
| 4  | 4  | 3 | 3 | 1 | 3  |
| 4  | 4  | 3 | 3 | 4 | 3  |
| 4  | 4  | 4 | 4 | 4 | 4  |
| 4  | 99 | 3 | 3 | 2 | 3  |
| 4  | 4  | 3 | 3 | 3 | 4  |
| 3  | 99 | 3 | 3 | 4 | 2  |
| 4  | 4  | 3 | 2 | 1 | 3  |
| 4  | 4  | 2 | 2 | 3 | 3  |
| 4  | 4  | 3 | 3 | 4 | 4  |
| 4  | 4  | 4 | 4 | 4 | 4  |
| 3  | 2  | 2 | 2 | 2 | 2  |
| 4  | 4  | 3 | 3 | 3 | 3  |
| 4  | 4  | 3 | 4 | 4 | 3  |
| 4  | 3  | 4 | 4 | 4 | 3  |
| 3  | 2  | 3 | 3 | 2 | 99 |
| 4  | 4  | 1 | 1 | 1 | 1  |
| 4  | 4  | 4 | 2 | 1 | 3  |
| 4  | 4  | 3 | 1 | 2 | 1  |
| 4  | 4  | 2 | 4 | 4 | 4  |
| 99 | 99 | 2 | 2 | 3 | 3  |
| 4  | 4  | 3 | 4 | 3 | 4  |
| 4  | 4  | 4 | 4 | 4 | 4  |
| 4  | 4  | 2 | 2 | 2 | 3  |
| 2  | 2  | 2 | 2 | 2 | 3  |
| 4  | 4  | 3 | 3 | 4 | 2  |
| 4  | 4  | 3 | 4 | 4 | 3  |
| 4  | 4  | 3 | 3 | 3 | 1  |
| 4  | 4  | 4 | 3 | 4 | 3  |
| 2  | 2  | 2 | 1 | 1 | 1  |
| 3  | 3  | 3 | 2 | 3 | 2  |
| 4  | 4  | 2 | 3 | 2 | 3  |
| 4  | 4  | 4 | 2 | 2 | 2  |
| 2  | 1  | 2 | 2 | 2 | 3  |
| 4  | 4  | 4 | 4 | 3 | 3  |
| 4  | 4  | 3 | 3 | 3 | 3  |
| 2  | 2  | 3 | 3 | 3 | 3  |
| 0  | 0  | 3 | 3 | 3 | 3  |
| 0  | 0  | 3 | 4 | 4 | 4  |
| 4  | 4  | 2 | 3 | 3 | 3  |
| 4  | 4  | 4 | 3 | 1 | 2  |
| 4  | 4  | 4 | 4 | 4 | 4  |
| 4  | 4  | 3 | 3 | 4 | 3  |
| 4  | 4  | 4 | 4 | 4 | 4  |
| 2  | 4  | 3 | 2 | 2 | 2  |
| 1  | 1  | 3 | 2 | 2 | 2  |
| 99 | 99 | 4 | 1 | 1 | 1  |
| 99 | 99 | 1 | 3 | 3 | 4  |
| 2  | 2  | 3 | 3 | 3 | 3  |



|    |    |    |    |    |    |
|----|----|----|----|----|----|
| 4  | 2  | 3  | 3  | 3  | 3  |
| 4  | 4  | 3  | 3  | 3  | 4  |
| 0  | 0  | 2  | 3  | 3  | 4  |
| 2  | 0  | 3  | 3  | 3  | 3  |
| 4  | 4  | 3  | 4  | 4  | 4  |
| 4  | 4  | 3  | 3  | 3  | 2  |
| 4  | 4  | 99 | 99 | 99 | 99 |
| 4  | 4  | 3  | 3  | 3  | 3  |
| 4  | 4  | 4  | 4  | 4  | 4  |
| 4  | 4  | 3  | 3  | 2  | 4  |
| 3  | 99 | 4  | 4  | 4  | 3  |
| 99 | 99 | 2  | 4  | 4  | 4  |
| 4  | 4  | 4  | 4  | 4  | 3  |
| 4  | 4  | 3  | 3  | 3  | 3  |
| 4  | 99 | 3  | 2  | 1  | 99 |
| 4  | 4  | 2  | 2  | 4  | 4  |
| 4  | 4  | 3  | 3  | 3  | 2  |
| 4  | 4  | 4  | 4  | 4  | 2  |
| 4  | 4  | 3  | 2  | 3  | 2  |
| 4  | 4  | 4  | 3  | 3  | 1  |
| 4  | 4  | 3  | 3  | 2  | 3  |
| 4  | 3  | 3  | 3  | 3  | 2  |
| 4  | 4  | 3  | 3  | 4  | 3  |
| 4  | 4  | 4  | 2  | 2  | 2  |
| 4  | 4  | 3  | 3  | 3  | 3  |
| 4  | 4  | 3  | 3  | 3  | 2  |
| 1  | 0  | 4  | 4  | 2  | 3  |
| 1  | 1  | 4  | 4  | 3  | 4  |
| 1  | 1  | 3  | 3  | 3  | 3  |
| 4  | 4  | 99 | 99 | 1  | 1  |
| 4  | 4  | 3  | 2  | 2  | 3  |
| 3  | 4  | 3  | 3  | 3  | 3  |
| 4  | 4  | 3  | 3  | 99 | 99 |
| 4  | 4  | 3  | 3  | 2  | 1  |
| 4  | 4  | 3  | 3  | 2  | 3  |
| 0  | 0  | 4  | 2  | 4  | 4  |
| 2  | 2  | 3  | 4  | 2  | 3  |
| 4  | 4  | 3  | 3  | 3  | 3  |
| 3  | 3  | 3  | 3  | 3  | 4  |
| 4  | 4  | 3  | 3  | 3  | 2  |
| 4  | 3  | 3  | 3  | 3  | 2  |
| 4  | 4  | 3  | 3  | 3  | 2  |
| 4  | 4  | 3  | 4  | 3  | 2  |
| 4  | 4  | 4  | 4  | 4  | 2  |
| 4  | 4  | 2  | 2  | 2  | 1  |
| 4  | 4  | 4  | 4  | 4  | 4  |
| 4  | 4  | 4  | 4  | 3  | 3  |
| 1  | 1  | 3  | 2  | 4  | 2  |

|   |   |    |    |   |    |
|---|---|----|----|---|----|
| 4 | 3 | 3  | 2  | 3 | 3  |
| 2 | 2 | 3  | 3  | 2 | 2  |
| 4 | 4 | 4  | 4  | 3 | 3  |
| 4 | 4 | 3  | 3  | 3 | 3  |
| 4 | 4 | 3  | 4  | 4 | 4  |
| 4 | 4 | 2  | 2  | 3 | 3  |
| 3 | 4 | 3  | 3  | 3 | 3  |
| 4 | 4 | 3  | 3  | 3 | 4  |
| 3 | 2 | 3  | 3  | 2 | 2  |
| 4 | 4 | 3  | 3  | 4 | 4  |
| 4 | 4 | 3  | 3  | 2 | 2  |
| 3 | 3 | 1  | 1  | 1 | 1  |
| 4 | 2 | 2  | 2  | 2 | 2  |
| 3 | 3 | 4  | 4  | 2 | 1  |
| 4 | 4 | 4  | 4  | 4 | 4  |
| 3 | 3 | 3  | 3  | 3 | 3  |
| 4 | 4 | 2  | 3  | 3 | 3  |
| 3 | 3 | 3  | 3  | 3 | 3  |
| 4 | 4 | 4  | 4  | 3 | 3  |
| 4 | 4 | 3  | 4  | 3 | 3  |
| 4 | 2 | 1  | 3  | 1 | 2  |
| 4 | 3 | 4  | 3  | 2 | 3  |
| 4 | 4 | 99 | 99 | 3 | 99 |
| 4 | 4 | 4  | 4  | 3 | 3  |
| 4 | 4 | 4  | 4  | 4 | 4  |
| 2 | 2 | 4  | 3  | 2 | 3  |
| 2 | 4 | 3  | 3  | 3 | 3  |
| 4 | 4 | 3  | 4  | 3 | 2  |
| 4 | 3 | 3  | 4  | 2 | 4  |
| 4 | 4 | 3  | 4  | 4 | 4  |
| 4 | 4 | 4  | 4  | 3 | 2  |
| 3 | 3 | 3  | 2  | 1 | 2  |
| 4 | 4 | 3  | 3  | 3 | 2  |
| 4 | 4 | 1  | 1  | 4 | 4  |
| 3 | 4 | 3  | 3  | 2 | 3  |
| 4 | 4 | 3  | 4  | 4 | 4  |
| 0 | 0 | 3  | 4  | 4 | 4  |
| 4 | 4 | 3  | 3  | 3 | 3  |
| 4 | 2 | 4  | 2  | 1 | 3  |
| 4 | 3 | 4  | 3  | 4 | 4  |
| 4 | 3 | 3  | 3  | 2 | 2  |
| 4 | 4 | 3  | 3  | 3 | 3  |
| 4 | 2 | 3  | 4  | 4 | 3  |
| 4 | 3 | 3  | 3  | 2 | 4  |
| 4 | 4 | 3  | 3  | 3 | 3  |
| 4 | 2 | 3  | 3  | 4 | 4  |
| 4 | 4 | 3  | 4  | 3 | 3  |
| 3 | 3 | 3  | 3  | 3 | 3  |

|    |    |    |    |    |    |
|----|----|----|----|----|----|
| 3  | 2  | 3  | 3  | 3  | 3  |
| 4  | 4  | 3  | 3  | 2  | 3  |
| 0  | 3  | 3  | 3  | 2  | 2  |
| 4  | 4  | 2  | 3  | 2  | 1  |
| 4  | 4  | 2  | 2  | 1  | 2  |
| 3  | 2  | 2  | 2  | 4  | 4  |
| 4  | 4  | 3  | 3  | 3  | 3  |
| 4  | 4  | 3  | 3  | 3  | 3  |
| 4  | 4  | 2  | 3  | 2  | 3  |
| 3  | 3  | 3  | 3  | 3  | 3  |
| 4  | 4  | 2  | 2  | 4  | 4  |
| 4  | 4  | 3  | 1  | 1  | 1  |
| 4  | 4  | 4  | 4  | 4  | 3  |
| 4  | 4  | 4  | 4  | 3  | 3  |
| 4  | 3  | 3  | 2  | 2  | 1  |
| 3  | 2  | 2  | 3  | 3  | 3  |
| 2  | 2  | 99 | 1  | 1  | 2  |
| 1  | 4  | 3  | 2  | 4  | 2  |
| 99 | 99 | 99 | 99 | 99 | 99 |
| 4  | 4  | 3  | 3  | 4  | 4  |
| 4  | 4  | 4  | 4  | 4  | 3  |
| 4  | 4  | 1  | 2  | 4  | 4  |
| 4  | 4  | 3  | 4  | 3  | 3  |
| 3  | 3  | 3  | 3  | 3  | 3  |
| 0  | 2  | 2  | 3  | 3  | 3  |
| 2  | 2  | 3  | 3  | 2  | 2  |
| 4  | 4  | 4  | 3  | 4  | 3  |
| 4  | 4  | 3  | 3  | 3  | 3  |
| 4  | 4  | 3  | 3  | 3  | 3  |
| 4  | 4  | 3  | 2  | 3  | 3  |
| 4  | 4  | 4  | 3  | 3  | 3  |
| 4  | 4  | 3  | 3  | 3  | 3  |
| 3  | 2  | 3  | 4  | 1  | 3  |
| 4  | 3  | 3  | 2  | 1  | 2  |
| 4  | 3  | 2  | 2  | 3  | 2  |
| 4  | 4  | 4  | 3  | 3  | 4  |
| 4  | 4  | 3  | 2  | 2  | 3  |
| 2  | 2  | 2  | 3  | 2  | 2  |
| 4  | 4  | 2  | 2  | 2  | 2  |
| 4  | 4  | 4  | 4  | 4  | 4  |
| 4  | 4  | 4  | 3  | 3  | 3  |
| 3  | 1  | 2  | 2  | 3  | 4  |
| 4  | 4  | 3  | 3  | 2  | 3  |
| 4  | 4  | 3  | 3  | 3  | 3  |
| 4  | 3  | 3  | 4  | 3  | 4  |
| 4  | 4  | 2  | 3  | 2  | 3  |
| 3  | 3  | 3  | 2  | 3  | 3  |
| 4  | 4  | 4  | 4  | 4  | 4  |

|   |   |   |   |   |   |
|---|---|---|---|---|---|
| 1 | 3 | 3 | 3 | 3 | 3 |
| 4 | 4 | 3 | 3 | 3 | 2 |
| 4 | 4 | 4 | 4 | 1 | 1 |
| 4 | 4 | 1 | 3 | 1 | 2 |
| 4 | 4 | 2 | 3 | 3 | 3 |
| 4 | 3 | 3 | 4 | 4 | 3 |
| 4 | 4 | 4 | 4 | 3 | 4 |
| 1 | 1 | 2 | 2 | 2 | 2 |
| 2 | 2 | 3 | 3 | 2 | 3 |
| 2 | 2 | 3 | 3 | 2 | 3 |
| 4 | 4 | 3 | 2 | 1 | 3 |
| 0 | 0 | 3 | 3 | 2 | 3 |
| 4 | 4 | 3 | 3 | 3 | 4 |
| 4 | 4 | 3 | 3 | 3 | 3 |
| 3 | 4 | 3 | 3 | 3 | 2 |
| 4 | 3 | 2 | 2 | 3 | 3 |
| 2 | 2 | 3 | 3 | 3 | 2 |
| 4 | 4 | 3 | 3 | 3 | 3 |
| 4 | 4 | 3 | 3 | 3 | 2 |
| 3 | 4 | 3 | 4 | 3 | 3 |
| 4 | 4 | 4 | 4 | 4 | 4 |
| 4 | 1 | 3 | 3 | 3 | 4 |
| 3 | 3 | 3 | 4 | 1 | 2 |
| 0 | 0 | 1 | 1 | 1 | 1 |
| 4 | 4 | 4 | 3 | 3 | 3 |
| 4 | 4 | 3 | 3 | 3 | 3 |
| 4 | 3 | 4 | 4 | 3 | 3 |
| 4 | 4 | 3 | 3 | 3 | 3 |
| 4 | 4 | 3 | 3 | 3 | 3 |
| 1 | 2 | 3 | 3 | 3 | 2 |
| 4 | 4 | 3 | 3 | 3 | 3 |
| 4 | 4 | 3 | 3 | 2 | 2 |
| 4 | 4 | 3 | 3 | 3 | 1 |
| 4 | 4 | 2 | 1 | 2 | 1 |
| 1 | 3 | 3 | 3 | 3 | 4 |
| 2 | 3 | 2 | 3 | 2 | 3 |
| 2 | 3 | 4 | 4 | 4 | 4 |
| 4 | 4 | 3 | 3 | 3 | 3 |
| 1 | 1 | 4 | 4 | 4 | 3 |
| 1 | 1 | 2 | 2 | 3 | 3 |
| 0 | 0 | 4 | 4 | 4 | 4 |
| 4 | 4 | 3 | 3 | 3 | 2 |
| 1 | 1 | 1 | 1 | 1 | 1 |
| 2 | 2 | 3 | 3 | 3 | 3 |
| 2 | 2 | 4 | 4 | 2 | 4 |
| 4 | 4 | 3 | 4 | 2 | 4 |
| 2 | 2 | 1 | 3 | 2 | 3 |
| 3 | 3 | 3 | 4 | 4 | 4 |

|        |  |        |  |        |  |        |  |        |  |        |
|--------|--|--------|--|--------|--|--------|--|--------|--|--------|
| 4      |  | 4      |  | 3      |  | 3      |  | 3      |  | 3      |
| 4      |  | 4      |  | 3      |  | 3      |  | 3      |  | 3      |
| 2      |  | 2      |  | 2      |  | 2      |  | 2      |  | 3      |
| 3      |  | 2      |  | 2      |  | 2      |  | 2      |  | 3      |
| 2      |  | 2      |  | 3      |  | 3      |  | 2      |  | 3      |
| 2      |  | 2      |  | 2      |  | 3      |  | 3      |  | 3      |
| 3      |  | 3      |  | 3      |  | 3      |  | 4      |  | 4      |
| 0      |  | 0      |  | 4      |  | 4      |  | 4      |  | 4      |
| 4      |  | 0      |  | 4      |  | 4      |  | 1      |  | 3      |
| 4      |  | 4      |  | 4      |  | 4      |  | 4      |  | 4      |
| 4      |  | 4      |  | 3      |  | 4      |  | 4      |  | 4      |
| 1      |  | 1      |  | 4      |  | 4      |  | 4      |  | 4      |
| #NULL! |  | #NULL! |  | #NULL! |  | #NULL! |  | #NULL! |  | #NULL! |
| 4      |  | 4      |  | 2      |  | 2      |  | 1      |  | 3      |
| 3      |  | 1      |  | 2      |  | 1      |  | 1      |  | 2      |
| 4      |  | 4      |  | 3      |  | 3      |  | 3      |  | 3      |
| 4      |  | 4      |  | 4      |  | 1      |  | 1      |  | 4      |
| 3      |  | 3      |  | 3      |  | 3      |  | 3      |  | 1      |
| 4      |  | 4      |  | 4      |  | 3      |  | 3      |  | 2      |
| 4      |  | 4      |  | 3      |  | 2      |  | 3      |  | 4      |
| 3      |  | 3      |  | 3      |  | 3      |  | 3      |  | 3      |
| 4      |  | 4      |  | 1      |  | 1      |  | 1      |  | 1      |
| 0      |  | 0      |  | 2      |  | 3      |  | 2      |  | 3      |
| 4      |  | 4      |  | 2      |  | 3      |  | 3      |  | 3      |
| 4      |  | 4      |  | 1      |  | 1      |  | 1      |  | 3      |
| 4      |  | 4      |  | 3      |  | 3      |  | 2      |  | 3      |
| 2      |  | 1      |  | 3      |  | 2      |  | 1      |  | 3      |
| 4      |  | 3      |  | 3      |  | 2      |  | 3      |  | 3      |
| 3      |  | 3      |  | 2      |  | 3      |  | 3      |  | 3      |
| 4      |  | 4      |  | 2      |  | 3      |  | 4      |  | 3      |
| 3      |  | 2      |  | 1      |  | 1      |  | 1      |  | 3      |
| 4      |  | 4      |  | 3      |  | 3      |  | 3      |  | 2      |
| 4      |  | 4      |  | 4      |  | 4      |  | 4      |  | 4      |
| 2      |  | 3      |  | 3      |  | 3      |  | 2      |  | 4      |
| 4      |  | 3      |  | 4      |  | 3      |  | 2      |  | 4      |
| 4      |  | 4      |  | 3      |  | 3      |  | 3      |  | 3      |
| 4      |  | 4      |  | 3      |  | 3      |  | 1      |  | 3      |
| 4      |  | 4      |  | 3      |  | 3      |  | 3      |  | 3      |
| 4      |  | 4      |  | 4      |  | 4      |  | 4      |  | 4      |
| 4      |  | 4      |  | 3      |  | 3      |  | 3      |  | 4      |
| 4      |  | 4      |  | 4      |  | 4      |  | 4      |  | 4      |
| 4      |  | 4      |  | 4      |  | 2      |  | 4      |  | 4      |
| 4      |  | 4      |  | 3      |  | 3      |  | 3      |  | 3      |
| 3      |  | 3      |  | 2      |  | 3      |  | 2      |  | 3      |
| 1      |  | 3      |  | 1      |  | 1      |  | 1      |  | 4      |
| 3      |  | 3      |  | 2      |  | 2      |  | 2      |  | 3      |
| 4      |  | 4      |  | 4      |  | 4      |  | 3      |  | 3      |
| 4      |  | 4      |  | 4      |  | 4      |  | 4      |  | 4      |

|        |        |        |        |        |        |        |
|--------|--------|--------|--------|--------|--------|--------|
| 4      | 3      | 3      | 3      | 3      | 3      | 3      |
| 4      | 4      | 4      | 4      | 4      | 2      | 2      |
| 4      | 4      | 2      | 3      | 3      | 3      | 3      |
| 4      | 4      | 3      | 3      | 3      | 3      | 3      |
| 4      | 4      | 4      | 4      | 4      | 4      | 4      |
| 3      | 4      | 3      | 3      | 3      | 3      | 3      |
| 2      | 3      | 4      | 4      | 4      | 4      | 4      |
| 4      | 4      | 4      | 3      | 3      | 1      | 3      |
| 4      | 4      | 4      | 4      | 3      | 3      | 3      |
| 4      | 4      | 2      | 3      | 3      | 2      | 4      |
| 4      | 4      | 3      | 3      | 4      | 3      | 3      |
| 4      | 4      | 3      | 3      | 4      | 3      | 3      |
| 4      | 4      | 3      | 3      | 4      | 2      | 4      |
| 4      | 4      | 3      | 2      | 2      | 3      | 3      |
| 3      | 3      | 3      | 3      | 3      | 3      | 3      |
| 4      | 4      | 3      | 3      | 3      | 3      | 3      |
| #NULL! | #NULL! | #NULL! | #NULL! | #NULL! | #NULL! | #NULL! |
| 4      | 4      | 1      | 3      | 4      | 4      | 4      |
| 3      | 3      | 3      | 3      | 4      | 4      | 2      |
| 4      | 4      | 4      | 3      | 3      | 3      | 3      |
| 4      | 3      | 2      | 2      | 2      | 2      | 4      |

| sconnecte_pre | sexknowa_pre | sexknowb_pre | sexknowc_pre | sexknowd_pre | sexknowe_pre |
|---------------|--------------|--------------|--------------|--------------|--------------|
| 3             | 2            | 2            | 2            | 2            | 2            |
| 4             | 2            | 2            | 2            | 2            | 2            |
| 3             | 2            | 2            | 0            | 1            | 2            |
| 2             | 2            | 1            | 0            | 0            | 2            |
| 4             | 2            | 2            | 99           | 99           | 2            |
| 99            | 99           | 99           | 99           | 99           | 99           |
| 4             | 2            | 1            | 1            | 0            | 1            |
| 2             | 2            | 1            | 0            | 0            | 1            |
| 99            | 99           | 99           | 99           | 99           | 99           |
| 2             | 2            | 0            | 0            | 0            | 0            |
| 4             | 2            | 2            | 2            | 2            | 2            |
| 3             | 2            | 0            | 0            | 0            | 0            |
| 3             | 2            | 2            | 2            | 2            | 2            |
| 3             | 2            | 2            | 2            | 2            | 2            |
| 4             | 2            | 2            | 2            | 2            | 2            |
| 3             | 2            | 2            | 2            | 2            | 2            |
| 4             | 2            | 2            | 2            | 2            | 2            |
| 2             | 2            | 2            | 0            | 2            | 0            |
| 4             | 2            | 0            | 2            | 0            | 2            |
| 4             | 1            | 1            | 1            | 0            | 0            |
| 99            | 99           | 99           | 99           | 99           | 99           |
| 4             | 2            | 2            | 2            | 2            | 2            |
| 4             | 2            | 2            | 2            | 2            | 2            |
| 4             | 2            | 2            | 2            | 0            | 2            |
| 4             | 2            | 2            | 2            | 2            | 2            |
| 3             | 2            | 2            | 2            | 2            | 2            |
| 3             | 0            | 0            | 0            | 0            | 2            |
| 4             | 2            | 2            | 2            | 2            | 2            |
| 4             | 2            | 2            | 2            | 2            | 2            |
| 3             | 2            | 2            | 2            | 1            | 1            |
| 4             | 2            | 1            | 0            | 1            | 1            |
| 3             | 0            | 0            | 0            | 1            | 1            |
| 3             | 2            | 1            | 0            | 0            | 2            |
| 3             | 99           | 1            | 99           | 0            | 1            |
| 4             | 99           | 99           | 99           | 99           | 99           |
| 4             | 2            | 2            | 2            | 2            | 2            |
| 3             | 0            | 0            | 1            | 0            | 1            |
| 3             | 2            | 2            | 0            | 2            | 2            |
| 3             | 2            | 1            | 0            | 1            | 2            |
| 3             | 1            | 0            | 0            | 0            | 0            |
| 4             | 2            | 2            | 2            | 2            | 2            |
| 1             | 2            | 2            | 2            | 2            | 2            |
| 3             | 2            | 2            | 0            | 0            | 0            |
| 4             | 2            | 2            | 2            | 2            | 2            |
| 4             | 2            | 2            | 0            | 0            | 2            |
| 4             | 2            | 2            | 0            | 0            | 2            |
| 2             | 1            | 0            | 0            | 0            | 1            |

|    |   |   |   |   |   |
|----|---|---|---|---|---|
| 1  | 1 | 0 | 0 | 0 | 0 |
| 4  | 2 | 0 | 0 | 0 | 2 |
| 3  | 2 | 2 | 0 | 0 | 2 |
| 2  | 1 | 0 | 0 | 0 | 1 |
| 3  | 2 | 1 | 1 | 0 | 0 |
| 3  | 2 | 1 | 0 | 0 | 1 |
| 3  | 2 | 2 | 2 | 2 | 2 |
| 2  | 2 | 2 | 1 | 0 | 1 |
| 3  | 2 | 2 | 0 | 2 | 2 |
| 4  | 2 | 2 | 2 | 2 | 2 |
| 3  | 2 | 2 | 2 | 2 | 2 |
| 3  | 2 | 2 | 2 | 2 | 2 |
| 4  | 2 | 2 | 2 | 2 | 2 |
| 3  | 2 | 0 | 0 | 0 | 1 |
| 3  | 0 | 0 | 0 | 0 | 1 |
| 1  | 2 | 1 | 0 | 0 | 2 |
| 3  | 0 | 1 | 0 | 0 | 1 |
| 1  | 2 | 2 | 0 | 2 | 1 |
| 2  | 1 | 2 | 0 | 2 | 2 |
| 4  | 1 | 0 | 1 | 0 | 1 |
| 3  | 2 | 0 | 0 | 2 | 2 |
| 4  | 2 | 0 | 0 | 0 | 0 |
| 3  | 2 | 0 | 0 | 0 | 1 |
| 4  | 2 | 0 | 2 | 2 | 1 |
| 3  | 2 | 2 | 0 | 2 | 2 |
| 4  | 2 | 2 | 2 | 2 | 2 |
| 4  | 2 | 2 | 2 | 2 | 2 |
| 4  | 0 | 1 | 1 | 0 | 1 |
| 2  | 2 | 0 | 0 | 0 | 0 |
| 3  | 2 | 1 | 0 | 2 | 1 |
| 4  | 2 | 0 | 2 | 0 | 2 |
| 3  | 0 | 2 | 2 | 2 | 0 |
| 3  | 0 | 0 | 0 | 2 | 2 |
| 3  | 1 | 2 | 0 | 0 | 1 |
| 2  | 2 | 2 | 2 | 0 | 2 |
| 2  | 2 | 1 | 0 | 0 | 2 |
| 1  | 2 | 2 | 0 | 2 | 2 |
| 3  | 1 | 2 | 1 | 0 | 1 |
| 3  | 1 | 0 | 0 | 0 | 2 |
| 4  | 1 | 0 | 0 | 0 | 1 |
| 3  | 1 | 0 | 2 | 0 | 1 |
| 2  | 1 | 0 | 2 | 0 | 0 |
| 1  | 0 | 0 | 2 | 0 | 1 |
| 1  | 2 | 2 | 2 | 2 | 2 |
| 99 | 2 | 1 | 0 | 0 | 2 |
| 3  | 1 | 0 | 0 | 0 | 1 |
| 3  | 1 | 0 | 0 | 0 | 1 |
| 3  | 1 | 0 | 0 | 0 | 1 |



|    |    |    |    |    |    |
|----|----|----|----|----|----|
| 3  | 0  | 1  | 0  | 2  | 2  |
| 3  | 1  | 0  | 0  | 0  | 0  |
| 3  | 0  | 0  | 0  | 0  | 1  |
| 4  | 1  | 0  | 0  | 0  | 1  |
| 4  | 1  | 1  | 0  | 0  | 0  |
| 3  | 0  | 0  | 0  | 0  | 1  |
| 1  | 2  | 0  | 0  | 0  | 1  |
| 3  | 0  | 2  | 0  | 0  | 1  |
| 3  | 1  | 0  | 0  | 0  | 2  |
| 3  | 1  | 0  | 0  | 0  | 1  |
| 3  | 0  | 0  | 0  | 0  | 0  |
| 1  | 1  | 0  | 0  | 0  | 1  |
| 3  | 1  | 0  | 2  | 0  | 1  |
| 3  | 0  | 2  | 1  | 0  | 1  |
| 3  | 2  | 2  | 0  | 2  | 2  |
| 4  | 1  | 0  | 0  | 0  | 0  |
| 4  | 1  | 0  | 0  | 0  | 0  |
| 2  | 2  | 0  | 0  | 0  | 0  |
| 3  | 1  | 2  | 0  | 0  | 1  |
| 3  | 2  | 2  | 2  | 2  | 2  |
| 3  | 1  | 1  | 0  | 0  | 0  |
| 3  | 0  | 1  | 0  | 0  | 1  |
| 4  | 1  | 1  | 1  | 0  | 0  |
| 1  | 0  | 0  | 0  | 0  | 1  |
| 4  | 0  | 0  | 0  | 0  | 0  |
| 3  | 1  | 1  | 1  | 0  | 1  |
| 3  | 0  | 0  | 0  | 0  | 1  |
| 4  | 1  | 0  | 0  | 0  | 1  |
| 3  | 1  | 0  | 0  | 0  | 1  |
| 3  | 1  | 0  | 0  | 0  | 1  |
| 99 | 99 | 99 | 99 | 99 | 99 |
| 1  | 1  | 0  | 0  | 0  | 0  |
| 99 | 99 | 99 | 99 | 99 | 99 |
| 99 | 1  | 0  | 0  | 0  | 1  |
| 3  | 0  | 0  | 0  | 0  | 1  |
| 2  | 1  | 1  | 0  | 0  | 1  |
| 3  | 0  | 0  | 0  | 0  | 0  |
| 3  | 1  | 1  | 0  | 1  | 1  |
| 3  | 0  | 0  | 0  | 0  | 1  |
| 2  | 0  | 1  | 0  | 0  | 1  |
| 3  | 1  | 0  | 0  | 0  | 1  |
| 3  | 1  | 1  | 0  | 0  | 1  |
| 3  | 2  | 0  | 0  | 0  | 0  |
| 3  | 1  | 1  | 0  | 0  | 0  |
| 3  | 1  | 0  | 0  | 0  | 0  |
| 99 | 99 | 99 | 99 | 99 | 99 |
| 3  | 1  | 0  | 0  | 0  | 1  |
| 2  | 99 | 0  | 0  | 0  | 0  |

|   |    |    |    |    |    |
|---|----|----|----|----|----|
| 2 | 1  | 1  | 0  | 0  | 1  |
| 3 | 1  | 0  | 0  | 0  | 1  |
| 4 | 1  | 0  | 0  | 0  | 1  |
| 1 | 1  | 0  | 1  | 0  | 0  |
| 2 | 0  | 99 | 0  | 0  | 1  |
| 3 | 0  | 0  | 0  | 0  | 0  |
| 3 | 0  | 1  | 0  | 1  | 0  |
| 3 | 1  | 1  | 0  | 0  | 1  |
| 2 | 0  | 0  | 0  | 1  | 0  |
| 1 | 0  | 1  | 0  | 0  | 0  |
| 4 | 0  | 0  | 0  | 0  | 0  |
| 4 | 1  | 2  | 99 | 99 | 99 |
| 2 | 0  | 1  | 0  | 0  | 1  |
| 3 | 0  | 1  | 0  | 0  | 1  |
| 3 | 0  | 0  | 0  | 1  | 0  |
| 3 | 0  | 0  | 0  | 1  | 0  |
| 3 | 0  | 1  | 0  | 1  | 0  |
| 4 | 0  | 1  | 0  | 1  | 1  |
| 3 | 1  | 1  | 0  | 1  | 1  |
| 3 | 0  | 0  | 0  | 1  | 0  |
| 3 | 1  | 0  | 1  | 1  | 0  |
| 4 | 0  | 1  | 0  | 1  | 0  |
| 4 | 1  | 1  | 0  | 0  | 1  |
| 3 | 1  | 0  | 0  | 0  | 1  |
| 3 | 0  | 0  | 0  | 0  | 0  |
| 3 | 0  | 0  | 0  | 0  | 1  |
| 3 | 1  | 0  | 0  | 0  | 1  |
| 3 | 0  | 1  | 0  | 1  | 0  |
| 4 | 1  | 1  | 0  | 0  | 0  |
| 4 | 1  | 0  | 0  | 0  | 0  |
| 4 | 99 | 99 | 99 | 99 | 99 |
| 3 | 0  | 1  | 0  | 0  | 0  |
| 3 | 0  | 0  | 0  | 1  | 1  |
| 3 | 0  | 0  | 0  | 0  | 0  |
| 3 | 0  | 1  | 0  | 0  | 1  |
| 3 | 99 | 1  | 0  | 0  | 0  |
| 4 | 1  | 0  | 0  | 0  | 0  |
| 2 | 0  | 0  | 0  | 1  | 0  |
| 4 | 1  | 1  | 1  | 1  | 0  |
| 3 | 1  | 0  | 0  | 0  | 1  |
| 4 | 1  | 0  | 0  | 0  | 0  |
| 3 | 1  | 1  | 0  | 1  | 1  |
| 4 | 0  | 1  | 0  | 0  | 1  |
| 1 | 1  | 0  | 0  | 0  | 1  |
| 2 | 1  | 0  | 0  | 0  | 1  |
| 1 | 0  | 1  | 0  | 0  | 1  |
| 4 | 0  | 0  | 0  | 0  | 0  |
| 4 | 1  | 1  | 0  | 0  | 0  |

|    |    |    |    |   |    |
|----|----|----|----|---|----|
| 4  | 99 | 99 | 0  | 1 | 99 |
| 4  | 0  | 1  | 0  | 0 | 0  |
| 4  | 2  | 2  | 2  | 2 | 2  |
| 3  | 1  | 1  | 0  | 0 | 0  |
| 4  | 1  | 0  | 0  | 0 | 1  |
| 1  | 1  | 0  | 0  | 0 | 1  |
| 3  | 1  | 1  | 0  | 0 | 1  |
| 2  | 1  | 0  | 0  | 0 | 1  |
| 3  | 0  | 0  | 1  | 1 | 1  |
| 3  | 1  | 0  | 0  | 0 | 1  |
| 3  | 99 | 0  | 0  | 0 | 1  |
| 2  | 1  | 1  | 0  | 0 | 1  |
| 2  | 1  | 0  | 0  | 0 | 1  |
| 2  | 1  | 0  | 0  | 0 | 1  |
| 4  | 0  | 0  | 0  | 0 | 0  |
| 3  | 1  | 1  | 0  | 0 | 1  |
| 3  | 0  | 0  | 0  | 0 | 1  |
| 3  | 1  | 99 | 0  | 1 | 1  |
| 3  | 1  | 0  | 0  | 0 | 1  |
| 2  | 1  | 0  | 0  | 0 | 1  |
| 4  | 1  | 0  | 0  | 0 | 1  |
| 4  | 1  | 1  | 1  | 0 | 1  |
| 4  | 1  | 0  | 0  | 1 | 1  |
| 3  | 0  | 0  | 0  | 0 | 0  |
| 1  | 1  | 0  | 99 | 0 | 1  |
| 2  | 1  | 1  | 0  | 0 | 0  |
| 1  | 0  | 0  | 0  | 1 | 0  |
| 3  | 1  | 0  | 0  | 0 | 1  |
| 1  | 1  | 0  | 0  | 0 | 1  |
| 4  | 1  | 0  | 0  | 0 | 1  |
| 3  | 1  | 0  | 0  | 0 | 1  |
| 3  | 1  | 0  | 0  | 0 | 1  |
| 4  | 1  | 0  | 0  | 0 | 1  |
| 99 | 1  | 1  | 99 | 0 | 1  |
| 2  | 0  | 0  | 0  | 0 | 0  |
| 1  | 1  | 0  | 0  | 0 | 1  |
| 3  | 0  | 0  | 0  | 0 | 1  |
| 3  | 1  | 1  | 0  | 1 | 0  |
| 1  | 0  | 1  | 0  | 0 | 1  |
| 2  | 1  | 1  | 0  | 0 | 1  |
| 3  | 1  | 0  | 0  | 1 | 1  |
| 2  | 1  | 0  | 0  | 0 | 1  |
| 4  | 1  | 0  | 0  | 0 | 1  |
| 3  | 1  | 1  | 0  | 0 | 0  |
| 1  | 0  | 1  | 0  | 0 | 0  |
| 1  | 0  | 0  | 0  | 1 | 1  |
| 3  | 0  | 0  | 0  | 0 | 0  |
| 4  | 0  | 0  | 0  | 0 | 0  |

|    |    |    |    |    |    |
|----|----|----|----|----|----|
| 4  | 0  | 1  | 0  | 0  | 1  |
| 1  | 1  | 0  | 0  | 0  | 1  |
| 2  | 0  | 1  | 0  | 0  | 0  |
| 3  | 1  | 1  | 0  | 1  | 0  |
| 4  | 1  | 1  | 99 | 0  | 0  |
| 3  | 1  | 1  | 0  | 0  | 1  |
| 3  | 1  | 0  | 0  | 0  | 0  |
| 1  | 1  | 1  | 1  | 0  | 1  |
| 1  | 1  | 1  | 1  | 0  | 1  |
| 2  | 1  | 0  | 0  | 0  | 1  |
| 3  | 99 | 99 | 0  | 0  | 99 |
| 3  | 99 | 99 | 0  | 0  | 99 |
| 3  | 0  | 0  | 0  | 0  | 0  |
| 3  | 1  | 1  | 0  | 0  | 1  |
| 4  | 1  | 1  | 0  | 1  | 1  |
| 2  | 1  | 1  | 0  | 0  | 1  |
| 3  | 1  | 1  | 0  | 1  | 1  |
| 1  | 99 | 99 | 99 | 99 | 99 |
| 2  | 1  | 0  | 0  | 1  | 0  |
| 4  | 0  | 0  | 1  | 0  | 0  |
| 3  | 1  | 1  | 0  | 0  | 1  |
| 1  | 1  | 0  | 0  | 0  | 0  |
| 3  | 1  | 0  | 0  | 0  | 1  |
| 3  | 0  | 1  | 0  | 1  | 0  |
| 2  | 1  | 0  | 0  | 1  | 0  |
| 3  | 1  | 1  | 0  | 0  | 1  |
| 4  | 1  | 0  | 0  | 1  | 0  |
| 3  | 1  | 1  | 0  | 0  | 0  |
| 3  | 0  | 0  | 0  | 0  | 0  |
| 3  | 99 | 99 | 99 | 0  | 0  |
| 3  | 1  | 1  | 0  | 1  | 0  |
| 3  | 1  | 1  | 0  | 1  | 0  |
| 3  | 0  | 1  | 0  | 0  | 1  |
| 3  | 1  | 1  | 0  | 0  | 0  |
| 4  | 99 | 2  | 2  | 2  | 99 |
| 3  | 1  | 1  | 0  | 0  | 0  |
| 2  | 99 | 99 | 99 | 99 | 99 |
| 2  | 99 | 1  | 0  | 0  | 99 |
| 3  | 0  | 0  | 0  | 0  | 1  |
| 3  | 1  | 1  | 0  | 0  | 0  |
| 1  | 1  | 0  | 0  | 1  | 1  |
| 3  | 99 | 99 | 0  | 99 | 0  |
| 3  | 0  | 1  | 0  | 0  | 0  |
| 3  | 1  | 1  | 0  | 0  | 0  |
| 99 | 0  | 1  | 0  | 0  | 0  |
| 2  | 1  | 0  | 0  | 0  | 0  |
| 2  | 0  | 1  | 0  | 0  | 0  |
| 4  | 1  | 0  | 0  | 0  | 1  |

|    |    |    |    |    |    |
|----|----|----|----|----|----|
| 3  | 1  | 1  | 0  | 0  | 1  |
| 4  | 0  | 0  | 0  | 0  | 0  |
| 3  | 0  | 1  | 0  | 0  | 1  |
| 99 | 99 | 99 | 99 | 99 | 99 |
| 4  | 0  | 0  | 0  | 0  | 0  |
| 3  | 0  | 0  | 0  | 0  | 1  |
| 2  | 0  | 0  | 1  | 0  | 1  |
| 2  | 99 | 1  | 0  | 0  | 0  |
| 1  | 0  | 0  | 0  | 0  | 1  |
| 3  | 1  | 0  | 0  | 0  | 1  |
| 3  | 0  | 0  | 0  | 0  | 1  |
| 3  | 1  | 0  | 0  | 0  | 1  |
| 3  | 0  | 0  | 0  | 0  | 0  |
| 2  | 0  | 1  | 0  | 1  | 1  |
| 3  | 1  | 0  | 0  | 0  | 1  |
| 4  | 1  | 0  | 0  | 0  | 0  |
| 3  | 1  | 1  | 0  | 0  | 0  |
| 2  | 1  | 0  | 0  | 1  | 1  |
| 4  | 1  | 0  | 0  | 0  | 1  |
| 4  | 0  | 1  | 0  | 0  | 1  |
| 3  | 1  | 0  | 0  | 0  | 1  |
| 4  | 1  | 0  | 0  | 0  | 1  |
| 3  | 1  | 0  | 0  | 0  | 1  |
| 3  | 1  | 0  | 0  | 0  | 1  |
| 3  | 1  | 0  | 0  | 0  | 1  |
| 3  | 0  | 99 | 1  | 0  | 1  |
| 3  | 1  | 0  | 0  | 0  | 1  |
| 1  | 1  | 1  | 0  | 0  | 1  |
| 4  | 99 | 99 | 99 | 99 | 99 |
| 2  | 99 | 99 | 99 | 99 | 99 |
| 3  | 1  | 0  | 0  | 0  | 0  |
| 3  | 1  | 0  | 0  | 0  | 1  |
| 3  | 1  | 1  | 0  | 0  | 1  |
| 3  | 0  | 0  | 0  | 0  | 1  |
| 3  | 1  | 1  | 0  | 0  | 1  |
| 3  | 1  | 0  | 0  | 0  | 1  |
| 2  | 1  | 0  | 0  | 0  | 1  |
| 3  | 1  | 1  | 0  | 0  | 1  |
| 4  | 0  | 0  | 0  | 0  | 0  |
| 3  | 1  | 0  | 0  | 0  | 1  |
| 3  | 0  | 0  | 0  | 0  | 1  |
| 3  | 0  | 0  | 0  | 0  | 1  |
| 2  | 1  | 1  | 0  | 0  | 1  |
| 2  | 1  | 0  | 0  | 0  | 1  |
| 2  | 1  | 0  | 0  | 0  | 0  |
| 3  | 1  | 0  | 0  | 0  | 1  |
| 2  | 0  | 1  | 0  | 0  | 1  |
| 3  | 0  | 0  | 0  | 0  | 0  |

|    |    |    |    |    |    |
|----|----|----|----|----|----|
| 3  | 0  | 0  | 0  | 0  | 1  |
| 2  | 0  | 0  | 0  | 0  | 1  |
| 99 | 1  | 1  | 0  | 0  | 0  |
| 3  | 1  | 0  | 0  | 0  | 1  |
| 3  | 0  | 1  | 0  | 1  | 0  |
| 99 | 0  | 0  | 0  | 0  | 0  |
| 1  | 1  | 0  | 0  | 0  | 1  |
| 2  | 1  | 0  | 0  | 0  | 1  |
| 2  | 0  | 0  | 0  | 0  | 1  |
| 4  | 1  | 0  | 0  | 0  | 1  |
| 3  | 1  | 0  | 0  | 0  | 1  |
| 1  | 99 | 99 | 99 | 99 | 99 |
| 2  | 1  | 0  | 0  | 0  | 1  |
| 3  | 99 | 0  | 0  | 0  | 1  |
| 3  | 1  | 0  | 0  | 0  | 1  |
| 1  | 1  | 0  | 0  | 0  | 1  |
| 3  | 1  | 0  | 0  | 0  | 1  |
| 4  | 1  | 1  | 0  | 0  | 1  |
| 3  | 2  | 1  | 0  | 1  | 1  |
| 1  | 0  | 0  | 0  | 0  | 1  |
| 2  | 0  | 0  | 1  | 1  | 1  |
| 1  | 1  | 1  | 0  | 0  | 1  |
| 3  | 1  | 0  | 0  | 0  | 1  |
| 1  | 0  | 1  | 0  | 0  | 1  |
| 3  | 1  | 0  | 0  | 0  | 0  |
| 3  | 0  | 1  | 1  | 0  | 1  |
| 4  | 0  | 0  | 0  | 0  | 1  |
| 4  | 99 | 99 | 99 | 99 | 99 |
| 3  | 1  | 0  | 0  | 0  | 1  |
| 4  | 1  | 1  | 99 | 1  | 1  |
| 2  | 1  | 1  | 0  | 0  | 1  |
| 4  | 0  | 1  | 0  | 0  | 0  |
| 3  | 0  | 0  | 0  | 0  | 1  |
| 4  | 99 | 99 | 99 | 99 | 99 |
| 3  | 1  | 1  | 1  | 1  | 1  |
| 4  | 0  | 0  | 0  | 0  | 0  |
| 1  | 0  | 0  | 0  | 0  | 1  |
| 4  | 1  | 0  | 1  | 0  | 1  |
| 3  | 0  | 1  | 0  | 1  | 0  |
| 3  | 99 | 1  | 0  | 0  | 1  |
| 4  | 1  | 0  | 0  | 0  | 1  |
| 3  | 0  | 1  | 0  | 0  | 1  |
| 3  | 1  | 0  | 0  | 1  | 0  |
| 1  | 0  | 1  | 0  | 1  | 0  |
| 2  | 1  | 1  | 1  | 1  | 1  |
| 1  | 0  | 0  | 0  | 0  | 0  |
| 3  | 99 | 99 | 0  | 99 | 99 |
| 3  | 1  | 1  | 0  | 1  | 1  |

|    |    |    |    |    |    |
|----|----|----|----|----|----|
| 4  | 1  | 0  | 0  | 0  | 1  |
| 4  | 1  | 0  | 0  | 0  | 1  |
| 3  | 1  | 0  | 0  | 0  | 1  |
| 4  | 0  | 1  | 0  | 99 | 99 |
| 3  | 1  | 0  | 0  | 1  | 0  |
| 3  | 0  | 1  | 0  | 0  | 1  |
| 3  | 0  | 1  | 0  | 0  | 0  |
| 1  | 1  | 0  | 1  | 0  | 1  |
| 3  | 1  | 0  | 1  | 1  | 1  |
| 1  | 1  | 0  | 0  | 0  | 0  |
| 2  | 0  | 0  | 0  | 0  | 0  |
| 4  | 0  | 1  | 0  | 0  | 1  |
| 3  | 99 | 0  | 0  | 0  | 1  |
| 3  | 0  | 1  | 1  | 0  | 1  |
| 3  | 99 | 0  | 0  | 0  | 1  |
| 3  | 0  | 1  | 0  | 1  | 0  |
| 3  | 1  | 0  | 0  | 0  | 1  |
| 1  | 0  | 0  | 0  | 0  | 1  |
| 3  | 1  | 0  | 0  | 0  | 1  |
| 4  | 0  | 0  | 0  | 0  | 1  |
| 2  | 1  | 0  | 1  | 0  | 1  |
| 4  | 0  | 1  | 0  | 0  | 0  |
| 2  | 0  | 1  | 0  | 0  | 1  |
| 99 | 99 | 99 | 99 | 99 | 99 |
| 3  | 1  | 1  | 0  | 0  | 1  |
| 1  | 1  | 1  | 0  | 0  | 1  |
| 2  | 1  | 0  | 0  | 0  | 1  |
| 3  | 1  | 0  | 0  | 0  | 1  |
| 4  | 1  | 0  | 0  | 0  | 0  |
| 3  | 0  | 1  | 0  | 1  | 0  |
| 3  | 1  | 0  | 0  | 1  | 1  |
| 2  | 0  | 0  | 0  | 0  | 1  |
| 4  | 1  | 1  | 0  | 1  | 1  |
| 3  | 0  | 0  | 0  | 1  | 0  |
| 3  | 1  | 1  | 0  | 0  | 0  |
| 3  | 1  | 0  | 0  | 0  | 1  |
| 4  | 0  | 0  | 0  | 0  | 1  |
| 3  | 1  | 0  | 0  | 0  | 0  |
| 1  | 0  | 0  | 0  | 0  | 1  |
| 4  | 2  | 2  | 2  | 2  | 2  |
| 4  | 99 | 0  | 0  | 0  | 1  |
| 2  | 1  | 0  | 0  | 0  | 1  |
| 2  | 0  | 0  | 1  | 0  | 1  |
| 99 | 99 | 99 | 99 | 99 | 99 |
| 3  | 99 | 0  | 0  | 0  | 1  |
| 2  | 99 | 0  | 0  | 0  | 1  |
| 3  | 0  | 0  | 0  | 0  | 1  |
| 99 | 1  | 0  | 99 | 0  | 1  |

|    |    |    |    |    |    |
|----|----|----|----|----|----|
| 4  | 0  | 0  | 0  | 0  | 0  |
| 4  | 0  | 99 | 0  | 0  | 1  |
| 4  | 99 | 99 | 99 | 99 | 99 |
| 4  | 1  | 0  | 0  | 1  | 1  |
| 3  | 99 | 0  | 0  | 0  | 0  |
| 3  | 0  | 0  | 0  | 0  | 1  |
| 2  | 1  | 0  | 0  | 0  | 0  |
| 2  | 0  | 0  | 0  | 0  | 1  |
| 3  | 1  | 99 | 0  | 0  | 1  |
| 2  | 0  | 0  | 0  | 0  | 1  |
| 2  | 1  | 0  | 0  | 0  | 1  |
| 3  | 0  | 0  | 0  | 0  | 1  |
| 4  | 1  | 1  | 0  | 0  | 1  |
| 2  | 1  | 0  | 0  | 0  | 1  |
| 3  | 0  | 0  | 0  | 0  | 1  |
| 1  | 0  | 0  | 0  | 0  | 0  |
| 1  | 0  | 0  | 0  | 0  | 0  |
| 3  | 0  | 1  | 1  | 1  | 1  |
| 4  | 0  | 0  | 0  | 0  | 1  |
| 2  | 1  | 1  | 0  | 1  | 1  |
| 1  | 0  | 0  | 0  | 0  | 1  |
| 99 | 99 | 99 | 99 | 99 | 99 |
| 2  | 0  | 0  | 0  | 0  | 1  |
| 3  | 1  | 1  | 0  | 0  | 1  |
| 2  | 1  | 0  | 0  | 0  | 1  |
| 2  | 1  | 1  | 0  | 0  | 1  |
| 3  | 1  | 0  | 0  | 0  | 1  |
| 1  | 0  | 0  | 0  | 0  | 1  |
| 3  | 0  | 1  | 0  | 0  | 1  |
| 3  | 0  | 1  | 0  | 0  | 1  |
| 2  | 1  | 1  | 0  | 0  | 1  |
| 1  | 1  | 0  | 0  | 0  | 1  |
| 3  | 99 | 0  | 0  | 0  | 1  |
| 2  | 1  | 99 | 0  | 0  | 1  |
| 4  | 1  | 0  | 0  | 0  | 1  |
| 4  | 0  | 0  | 0  | 0  | 0  |
| 2  | 1  | 0  | 0  | 0  | 1  |
| 2  | 0  | 1  | 0  | 0  | 1  |
| 3  | 1  | 0  | 0  | 0  | 0  |
| 2  | 1  | 1  | 0  | 0  | 1  |
| 3  | 1  | 0  | 0  | 0  | 1  |
| 99 | 99 | 99 | 99 | 99 | 99 |
| 1  | 1  | 1  | 0  | 0  | 0  |
| 3  | 0  | 1  | 0  | 0  | 1  |
| 3  | 1  | 0  | 1  | 0  | 1  |
| 2  | 1  | 0  | 0  | 0  | 0  |
| 3  | 1  | 0  | 1  | 0  | 1  |
| 2  | 1  | 0  | 0  | 0  | 0  |



|    |    |    |    |    |    |
|----|----|----|----|----|----|
| 2  | 1  | 1  | 0  | 1  | 0  |
| 3  | 99 | 0  | 0  | 0  | 99 |
| 3  | 0  | 1  | 0  | 0  | 1  |
| 3  | 99 | 99 | 99 | 99 | 99 |
| 2  | 0  | 0  | 0  | 0  | 1  |
| 3  | 1  | 0  | 0  | 0  | 1  |
| 4  | 0  | 0  | 0  | 1  | 0  |
| 1  | 0  | 1  | 0  | 1  | 1  |
| 4  | 0  | 0  | 1  | 0  | 0  |
| 1  | 0  | 1  | 0  | 0  | 99 |
| 3  | 99 | 0  | 99 | 0  | 99 |
| 1  | 0  | 0  | 0  | 1  | 1  |
| 3  | 1  | 0  | 0  | 0  | 0  |
| 3  | 0  | 0  | 0  | 0  | 1  |
| 1  | 99 | 99 | 99 | 99 | 99 |
| 4  | 1  | 1  | 0  | 0  | 1  |
| 2  | 0  | 0  | 0  | 0  | 0  |
| 3  | 1  | 1  | 0  | 1  | 1  |
| 3  | 1  | 0  | 0  | 0  | 0  |
| 2  | 0  | 1  | 1  | 0  | 1  |
| 2  | 0  | 0  | 0  | 0  | 1  |
| 2  | 0  | 1  | 0  | 0  | 0  |
| 4  | 1  | 1  | 0  | 0  | 0  |
| 3  | 0  | 0  | 1  | 0  | 1  |
| 99 | 99 | 99 | 99 | 99 | 99 |
| 3  | 1  | 0  | 1  | 0  | 1  |
| 3  | 0  | 0  | 1  | 0  | 1  |
| 2  | 1  | 0  | 1  | 1  | 1  |
| 4  | 0  | 0  | 0  | 1  | 0  |
| 2  | 1  | 0  | 0  | 0  | 0  |
| 3  | 0  | 0  | 1  | 0  | 0  |
| 4  | 99 | 1  | 1  | 0  | 0  |
| 2  | 0  | 0  | 0  | 1  | 1  |
| 1  | 99 | 1  | 99 | 99 | 99 |
| 4  | 99 | 99 | 99 | 99 | 99 |
| 3  | 0  | 0  | 1  | 0  | 1  |
| 2  | 1  | 1  | 0  | 0  | 1  |
| 2  | 0  | 1  | 0  | 0  | 0  |
| 3  | 1  | 0  | 0  | 0  | 1  |
| 1  | 0  | 1  | 1  | 0  | 1  |
| 3  | 1  | 1  | 0  | 0  | 1  |
| 3  | 0  | 0  | 0  | 0  | 0  |
| 2  | 1  | 0  | 0  | 0  | 1  |
| 2  | 1  | 0  | 1  | 0  | 1  |
| 3  | 1  | 0  | 0  | 0  | 1  |
| 3  | 1  | 0  | 0  | 0  | 0  |
| 99 | 99 | 0  | 0  | 0  | 1  |
| 2  | 1  | 0  | 0  | 1  | 1  |

|    |    |    |    |    |    |
|----|----|----|----|----|----|
| 2  | 1  | 0  | 0  | 0  | 0  |
| 3  | 1  | 0  | 0  | 0  | 1  |
| 99 | 99 | 0  | 0  | 0  | 0  |
| 3  | 1  | 0  | 0  | 0  | 0  |
| 3  | 1  | 0  | 0  | 0  | 1  |
| 3  | 1  | 0  | 0  | 0  | 1  |
| 3  | 99 | 99 | 0  | 99 | 99 |
| 1  | 99 | 99 | 99 | 99 | 99 |
| 4  | 1  | 0  | 1  | 0  | 0  |
| 3  | 0  | 0  | 0  | 0  | 0  |
| 1  | 1  | 0  | 1  | 0  | 1  |
| 4  | 0  | 0  | 0  | 0  | 0  |
| 4  | 1  | 1  | 0  | 1  | 0  |
| 3  | 0  | 0  | 0  | 0  | 1  |
| 99 | 99 | 99 | 99 | 99 | 99 |
| 3  | 1  | 0  | 0  | 0  | 1  |
| 3  | 1  | 0  | 0  | 99 | 1  |
| 4  | 0  | 0  | 0  | 0  | 1  |
| 3  | 1  | 0  | 0  | 0  | 1  |
| 3  | 1  | 0  | 0  | 0  | 1  |
| 3  | 0  | 0  | 1  | 0  | 1  |
| 3  | 0  | 1  | 0  | 0  | 1  |
| 2  | 0  | 1  | 0  | 1  | 0  |
| 4  | 1  | 0  | 0  | 0  | 1  |
| 2  | 1  | 0  | 0  | 0  | 1  |
| 99 | 1  | 0  | 0  | 0  | 1  |
| 1  | 99 | 0  | 0  | 99 | 99 |
| 3  | 0  | 0  | 0  | 0  | 1  |
| 3  | 1  | 1  | 0  | 0  | 0  |
| 3  | 1  | 1  | 0  | 0  | 1  |
| 3  | 1  | 1  | 0  | 0  | 1  |
| 3  | 0  | 0  | 0  | 0  | 0  |
| 1  | 1  | 0  | 0  | 0  | 0  |
| 3  | 1  | 0  | 0  | 0  | 1  |
| 2  | 99 | 99 | 99 | 99 | 99 |
| 1  | 99 | 99 | 99 | 99 | 99 |
| 3  | 1  | 0  | 0  | 1  | 1  |
| 3  | 1  | 1  | 0  | 0  | 0  |
| 3  | 0  | 0  | 0  | 0  | 1  |
| 3  | 0  | 0  | 0  | 1  | 1  |
| 1  | 99 | 0  | 0  | 0  | 1  |
| 3  | 1  | 0  | 0  | 0  | 1  |
| 3  | 0  | 0  | 0  | 0  | 1  |
| 2  | 1  | 0  | 1  | 0  | 1  |
| 99 | 1  | 0  | 0  | 0  | 99 |
| 4  | 1  | 1  | 1  | 1  | 0  |
| 3  | 99 | 99 | 0  | 99 | 99 |
| 3  | 0  | 0  | 0  | 0  | 0  |

|    |    |    |    |    |    |    |
|----|----|----|----|----|----|----|
| 3  | 1  | 1  | 1  | 1  | 1  | 1  |
| 1  | 0  | 0  | 0  | 0  | 0  | 0  |
| 2  | 0  | 0  | 0  | 0  | 1  | 1  |
| 2  | 0  | 0  | 0  | 0  | 0  | 1  |
| 3  | 0  | 0  | 0  | 0  | 0  | 1  |
| 4  | 1  | 0  | 0  | 0  | 0  | 1  |
| 4  | 1  | 0  | 0  | 0  | 1  | 1  |
| 3  | 0  | 0  | 0  | 0  | 0  | 1  |
| 3  | 1  | 1  | 1  | 0  | 0  | 1  |
| 1  | 0  | 1  | 1  | 0  | 0  | 0  |
| 2  | 0  | 0  | 0  | 1  | 0  | 0  |
| 2  | 0  | 0  | 0  | 0  | 0  | 0  |
| 3  | 99 | 99 | 99 | 99 | 99 | 99 |
| 4  | 99 | 99 | 99 | 99 | 99 | 99 |
| 3  | 99 | 99 | 99 | 99 | 99 | 99 |
| 3  | 99 | 99 | 99 | 99 | 99 | 99 |
| 4  | 99 | 99 | 99 | 99 | 99 | 99 |
| 4  | 99 | 99 | 99 | 99 | 99 | 99 |
| 3  | 99 | 99 | 99 | 99 | 99 | 99 |
| 4  | 99 | 99 | 99 | 99 | 99 | 99 |
| 3  | 99 | 99 | 99 | 99 | 99 | 99 |
| 4  | 99 | 99 | 99 | 99 | 99 | 99 |
| 4  | 99 | 99 | 99 | 99 | 99 | 99 |
| 3  | 99 | 99 | 99 | 99 | 99 | 99 |
| 3  | 99 | 99 | 99 | 99 | 99 | 99 |
| 4  | 99 | 99 | 99 | 99 | 99 | 99 |
| 99 | 99 | 99 | 99 | 99 | 99 | 99 |
| 4  | 99 | 99 | 99 | 99 | 99 | 99 |
| 3  | 99 | 99 | 99 | 99 | 99 | 99 |
| 4  | 99 | 99 | 99 | 99 | 99 | 99 |
| 99 | 99 | 99 | 99 | 99 | 99 | 99 |
| 4  | 99 | 99 | 99 | 99 | 99 | 99 |
| 4  | 99 | 99 | 99 | 99 | 99 | 99 |
| 4  | 99 | 99 | 99 | 99 | 99 | 99 |
| 3  | 99 | 99 | 99 | 99 | 99 | 99 |
| 3  | 99 | 99 | 99 | 99 | 99 | 99 |
| 3  | 99 | 99 | 99 | 99 | 99 | 99 |
| 4  | 99 | 99 | 99 | 99 | 99 | 99 |
| 4  | 99 | 99 | 99 | 99 | 99 | 99 |
| 4  | 99 | 99 | 99 | 99 | 99 | 99 |
| 4  | 99 | 99 | 99 | 99 | 99 | 99 |
| 4  | 99 | 99 | 99 | 99 | 99 | 99 |
| 3  | 99 | 99 | 99 | 99 | 99 | 99 |
| 4  | 99 | 99 | 99 | 99 | 99 | 99 |
| 3  | 99 | 99 | 99 | 99 | 99 | 99 |
| 4  | 99 | 99 | 99 | 99 | 99 | 99 |
| 4  | 99 | 99 | 99 | 99 | 99 | 99 |
| 4  | 99 | 99 | 99 | 99 | 99 | 99 |

|    |    |    |    |    |    |
|----|----|----|----|----|----|
| 4  | 99 | 99 | 99 | 99 | 99 |
| 3  | 99 | 99 | 99 | 99 | 99 |
| 4  | 99 | 99 | 99 | 99 | 99 |
| 4  | 99 | 99 | 99 | 99 | 99 |
| 4  | 99 | 99 | 99 | 99 | 99 |
| 4  | 99 | 99 | 99 | 99 | 99 |
| 4  | 99 | 99 | 99 | 99 | 99 |
| 3  | 99 | 99 | 99 | 99 | 99 |
| 4  | 99 | 99 | 99 | 99 | 99 |
| 4  | 99 | 99 | 99 | 99 | 99 |
| 3  | 99 | 99 | 99 | 99 | 99 |
| 3  | 99 | 99 | 99 | 99 | 99 |
| 3  | 99 | 99 | 99 | 99 | 99 |
| 3  | 99 | 99 | 99 | 99 | 99 |
| 3  | 99 | 99 | 99 | 99 | 99 |
| 3  | 99 | 99 | 99 | 99 | 99 |
| 4  | 99 | 99 | 99 | 99 | 99 |
| 3  | 99 | 99 | 99 | 99 | 99 |
| 3  | 99 | 99 | 99 | 99 | 99 |
| 2  | 99 | 99 | 99 | 99 | 99 |
| 1  | 99 | 99 | 99 | 99 | 99 |
| 3  | 99 | 99 | 99 | 99 | 99 |
| 3  | 99 | 99 | 99 | 99 | 99 |
| 4  | 99 | 99 | 99 | 99 | 99 |
| 3  | 99 | 99 | 99 | 99 | 99 |
| 4  | 99 | 99 | 99 | 99 | 99 |
| 1  | 99 | 99 | 99 | 99 | 99 |
| 3  | 99 | 99 | 99 | 99 | 99 |
| 4  | 99 | 99 | 99 | 99 | 99 |
| 3  | 99 | 99 | 99 | 99 | 99 |
| 2  | 99 | 99 | 99 | 99 | 99 |
| 3  | 99 | 99 | 99 | 99 | 99 |
| 1  | 99 | 99 | 99 | 99 | 99 |
| 3  | 99 | 99 | 99 | 99 | 99 |
| 99 | 99 | 99 | 99 | 99 | 99 |
| 2  | 99 | 99 | 99 | 99 | 99 |
| 2  | 99 | 99 | 99 | 99 | 99 |
| 4  | 99 | 99 | 99 | 99 | 99 |
| 3  | 99 | 99 | 99 | 99 | 99 |
| 3  | 99 | 99 | 99 | 99 | 99 |
| 1  | 99 | 99 | 99 | 99 | 99 |
| 3  | 99 | 99 | 99 | 99 | 99 |
| 3  | 99 | 99 | 99 | 99 | 99 |
| 3  | 99 | 99 | 99 | 99 | 99 |
| 4  | 99 | 99 | 99 | 99 | 99 |
| 2  | 99 | 99 | 99 | 99 | 99 |
| 2  | 99 | 99 | 99 | 99 | 99 |
| 3  | 99 | 99 | 99 | 99 | 99 |

|    |    |    |    |    |    |
|----|----|----|----|----|----|
| 3  | 99 | 99 | 99 | 99 | 99 |
| 4  | 99 | 99 | 99 | 99 | 99 |
| 2  | 99 | 99 | 99 | 99 | 99 |
| 3  | 99 | 99 | 99 | 99 | 99 |
| 3  | 99 | 99 | 99 | 99 | 99 |
| 1  | 99 | 99 | 99 | 99 | 99 |
| 4  | 99 | 99 | 99 | 99 | 99 |
| 3  | 99 | 99 | 99 | 99 | 99 |
| 3  | 99 | 99 | 99 | 99 | 99 |
| 3  | 99 | 99 | 99 | 99 | 99 |
| 1  | 99 | 99 | 99 | 99 | 99 |
| 2  | 99 | 99 | 99 | 99 | 99 |
| 2  | 99 | 99 | 99 | 99 | 99 |
| 3  | 99 | 99 | 99 | 99 | 99 |
| 3  | 99 | 99 | 99 | 99 | 99 |
| 99 | 99 | 99 | 99 | 99 | 99 |
| 3  | 99 | 99 | 99 | 99 | 99 |
| 1  | 99 | 99 | 99 | 99 | 99 |
| 3  | 99 | 99 | 99 | 99 | 99 |
| 3  | 99 | 99 | 99 | 99 | 99 |
| 1  | 99 | 99 | 99 | 99 | 99 |
| 2  | 99 | 99 | 99 | 99 | 99 |
| 3  | 99 | 99 | 99 | 99 | 99 |
| 2  | 99 | 99 | 99 | 99 | 99 |
| 2  | 99 | 99 | 99 | 99 | 99 |
| 3  | 2  | 2  | 2  | 2  | 99 |
| 3  | 2  | 2  | 2  | 2  | 2  |
| 1  | 2  | 1  | 0  | 0  | 1  |
| 4  | 2  | 0  | 1  | 0  | 1  |
| 4  | 2  | 2  | 2  | 2  | 2  |
| 4  | 1  | 0  | 0  | 0  | 1  |
| 3  | 2  | 1  | 2  | 0  | 2  |
| 3  | 2  | 2  | 2  | 2  | 2  |
| 99 | 99 | 99 | 99 | 99 | 99 |
| 3  | 2  | 1  | 2  | 2  | 1  |
| 4  | 2  | 2  | 2  | 2  | 2  |
| 3  | 2  | 1  | 0  | 2  | 2  |
| 3  | 2  | 2  | 2  | 2  | 2  |
| 3  | 2  | 0  | 0  | 0  | 1  |
| 1  | 2  | 2  | 0  | 2  | 2  |
| 4  | 2  | 2  | 2  | 2  | 2  |
| 2  | 2  | 0  | 1  | 0  | 0  |
| 3  | 2  | 0  | 0  | 0  | 1  |
| 3  | 2  | 2  | 2  | 0  | 2  |
| 3  | 2  | 2  | 2  | 2  | 2  |
| 4  | 2  | 0  | 1  | 2  | 2  |
| 4  | 2  | 2  | 0  | 2  | 2  |
| 1  | 2  | 1  | 2  | 2  | 2  |

|    |   |   |   |   |   |   |
|----|---|---|---|---|---|---|
| 3  | 2 | 2 | 2 | 2 | 2 | 2 |
| 3  | 2 | 2 | 2 | 2 | 2 | 2 |
| 2  | 2 | 2 | 2 | 0 | 2 | 1 |
| 4  | 2 | 2 | 2 | 2 | 2 | 2 |
| 4  | 2 | 2 | 2 | 0 | 2 | 2 |
| 4  | 2 | 2 | 2 | 0 | 2 | 2 |
| 4  | 2 | 1 | 2 | 2 | 1 | 2 |
| 2  | 2 | 2 | 2 | 0 | 0 | 2 |
| 2  | 2 | 2 | 2 | 0 | 2 | 2 |
| 3  | 2 | 1 | 2 | 2 | 0 | 1 |
| 2  | 2 | 2 | 2 | 2 | 2 | 2 |
| 3  | 2 | 0 | 2 | 0 | 0 | 2 |
| 3  | 2 | 2 | 2 | 2 | 2 | 2 |
| 4  | 2 | 0 | 2 | 0 | 0 | 2 |
| 3  | 2 | 2 | 2 | 0 | 0 | 2 |
| 3  | 2 | 0 | 2 | 2 | 2 | 2 |
| 3  | 2 | 2 | 2 | 0 | 0 | 2 |
| 3  | 1 | 0 | 2 | 2 | 2 | 0 |
| 3  | 2 | 1 | 2 | 0 | 2 | 2 |
| 4  | 2 | 2 | 2 | 2 | 2 | 2 |
| 4  | 2 | 0 | 2 | 2 | 0 | 1 |
| 4  | 2 | 1 | 2 | 0 | 0 | 1 |
| 1  | 2 | 2 | 2 | 0 | 2 | 2 |
| 4  | 2 | 2 | 2 | 0 | 2 | 2 |
| 3  | 2 | 2 | 2 | 0 | 2 | 2 |
| 2  | 2 | 0 | 2 | 0 | 2 | 1 |
| 3  | 2 | 1 | 2 | 0 | 0 | 2 |
| 3  | 2 | 1 | 2 | 0 | 0 | 2 |
| 2  | 2 | 2 | 2 | 0 | 0 | 1 |
| 3  | 2 | 2 | 2 | 2 | 2 | 2 |
| 3  | 2 | 0 | 2 | 2 | 2 | 2 |
| 99 | 2 | 2 | 2 | 0 | 2 | 2 |
| 4  | 2 | 2 | 2 | 0 | 2 | 2 |
| 4  | 2 | 2 | 2 | 2 | 1 | 2 |
| 4  | 2 | 1 | 2 | 0 | 1 | 2 |
| 4  | 2 | 2 | 2 | 0 | 2 | 2 |
| 1  | 2 | 2 | 2 | 0 | 2 | 1 |
| 3  | 0 | 0 | 2 | 0 | 0 | 0 |
| 1  | 2 | 2 | 2 | 2 | 2 | 2 |
| 3  | 2 | 0 | 2 | 2 | 2 | 2 |
| 3  | 2 | 2 | 2 | 0 | 2 | 2 |
| 4  | 2 | 2 | 2 | 2 | 2 | 2 |
| 3  | 2 | 2 | 2 | 2 | 2 | 2 |
| 2  | 2 | 2 | 2 | 2 | 2 | 1 |
| 4  | 2 | 1 | 2 | 0 | 1 | 1 |
| 2  | 2 | 2 | 2 | 0 | 0 | 2 |
| 3  | 2 | 2 | 2 | 0 | 2 | 1 |

|    |    |    |    |    |    |
|----|----|----|----|----|----|
| 2  | 2  | 0  | 2  | 0  | 1  |
| 3  | 2  | 2  | 2  | 2  | 2  |
| 4  | 2  | 0  | 0  | 2  | 2  |
| 3  | 2  | 2  | 2  | 2  | 2  |
| 3  | 1  | 2  | 0  | 0  | 2  |
| 4  | 2  | 2  | 2  | 2  | 1  |
| 3  | 2  | 2  | 0  | 0  | 1  |
| 3  | 99 | 0  | 2  | 0  | 1  |
| 4  | 2  | 2  | 0  | 0  | 1  |
| 3  | 2  | 99 | 1  | 0  | 2  |
| 2  | 2  | 2  | 0  | 0  | 2  |
| 4  | 1  | 1  | 1  | 1  | 1  |
| 99 | 99 | 99 | 99 | 99 | 99 |
| 4  | 0  | 0  | 0  | 0  | 0  |
| 4  | 1  | 0  | 0  | 0  | 1  |
| 3  | 1  | 0  | 2  | 0  | 1  |
| 2  | 0  | 0  | 0  | 2  | 0  |
| 3  | 0  | 1  | 1  | 0  | 1  |
| 2  | 1  | 0  | 2  | 2  | 2  |
| 3  | 1  | 0  | 0  | 0  | 2  |
| 2  | 2  | 2  | 2  | 2  | 2  |
| 2  | 0  | 0  | 0  | 1  | 1  |
| 4  | 2  | 2  | 0  | 0  | 0  |
| 3  | 1  | 0  | 0  | 0  | 1  |
| 3  | 2  | 0  | 0  | 0  | 0  |
| 3  | 1  | 0  | 2  | 0  | 1  |
| 4  | 1  | 1  | 1  | 1  | 1  |
| 4  | 1  | 2  | 2  | 2  | 2  |
| 3  | 2  | 2  | 0  | 1  | 1  |
| 3  | 2  | 2  | 0  | 0  | 2  |
| 4  | 1  | 1  | 0  | 1  | 1  |
| 4  | 2  | 2  | 0  | 2  | 2  |
| 3  | 1  | 1  | 0  | 1  | 1  |
| 1  | 1  | 0  | 0  | 0  | 1  |
| 3  | 2  | 0  | 0  | 2  | 2  |
| 4  | 2  | 2  | 2  | 1  | 2  |
| 3  | 2  | 0  | 1  | 0  | 0  |
| 2  | 2  | 1  | 2  | 0  | 1  |
| 4  | 2  | 2  | 0  | 2  | 2  |
| 4  | 2  | 2  | 2  | 2  | 2  |
| 2  | 2  | 2  | 0  | 0  | 0  |
| 4  | 2  | 2  | 0  | 2  | 0  |
| 99 | 2  | 0  | 1  | 0  | 1  |
| 4  | 2  | 0  | 2  | 2  | 2  |
| 3  | 2  | 2  | 2  | 2  | 2  |
| 3  | 2  | 2  | 2  | 2  | 2  |
| 3  | 2  | 2  | 2  | 2  | 2  |
| 2  | 1  | 0  | 0  | 0  | 1  |

|   |    |    |    |    |    |
|---|----|----|----|----|----|
| 3 | 2  | 0  | 0  | 0  | 2  |
| 2 | 1  | 1  | 0  | 0  | 1  |
| 3 | 1  | 1  | 0  | 0  | 2  |
| 4 | 2  | 2  | 0  | 2  | 2  |
| 4 | 2  | 2  | 2  | 2  | 2  |
| 2 | 2  | 1  | 0  | 0  | 2  |
| 3 | 2  | 2  | 2  | 0  | 2  |
| 4 | 2  | 1  | 0  | 0  | 2  |
| 4 | 2  | 2  | 2  | 2  | 2  |
| 3 | 2  | 2  | 2  | 2  | 2  |
| 3 | 1  | 2  | 0  | 2  | 1  |
| 3 | 1  | 2  | 2  | 2  | 1  |
| 3 | 2  | 2  | 2  | 2  | 2  |
| 3 | 2  | 2  | 2  | 2  | 2  |
| 3 | 2  | 2  | 0  | 2  | 2  |
| 1 | 2  | 0  | 0  | 0  | 1  |
| 3 | 1  | 1  | 0  | 1  | 1  |
| 3 | 2  | 2  | 2  | 2  | 1  |
| 1 | 1  | 1  | 1  | 2  | 0  |
| 4 | 2  | 2  | 2  | 1  | 2  |
| 3 | 2  | 1  | 0  | 1  | 1  |
| 1 | 2  | 2  | 2  | 2  | 2  |
| 2 | 2  | 0  | 0  | 0  | 1  |
| 2 | 2  | 0  | 0  | 1  | 0  |
| 3 | 2  | 0  | 0  | 0  | 2  |
| 2 | 0  | 1  | 0  | 0  | 0  |
| 4 | 2  | 2  | 2  | 2  | 1  |
| 3 | 2  | 0  | 0  | 0  | 1  |
| 3 | 1  | 0  | 0  | 0  | 2  |
| 3 | 1  | 0  | 0  | 0  | 1  |
| 1 | 2  | 0  | 2  | 2  | 1  |
| 3 | 2  | 2  | 0  | 0  | 0  |
| 3 | 2  | 2  | 0  | 2  | 2  |
| 2 | 2  | 0  | 0  | 0  | 0  |
| 2 | 2  | 0  | 0  | 0  | 1  |
| 2 | 2  | 2  | 0  | 0  | 1  |
| 4 | 2  | 2  | 2  | 2  | 2  |
| 2 | 1  | 0  | 0  | 0  | 1  |
| 1 | 99 | 99 | 99 | 99 | 99 |
| 4 | 1  | 2  | 0  | 0  | 1  |
| 3 | 2  | 2  | 2  | 2  | 2  |
| 2 | 2  | 2  | 0  | 2  | 2  |
| 2 | 2  | 0  | 0  | 2  | 2  |
| 3 | 2  | 2  | 0  | 0  | 1  |
| 3 | 2  | 0  | 0  | 0  | 1  |
| 3 | 2  | 2  | 0  | 0  | 2  |
| 2 | 1  | 0  | 2  | 0  | 1  |
| 3 | 2  | 0  | 0  | 0  | 1  |



|    |    |    |    |    |    |
|----|----|----|----|----|----|
| 3  | 2  | 0  | 0  | 2  | 1  |
| 1  | 2  | 0  | 0  | 0  | 2  |
| 4  | 2  | 2  | 2  | 2  | 2  |
| 3  | 2  | 0  | 2  | 0  | 1  |
| 1  | 2  | 2  | 1  | 0  | 1  |
| 2  | 1  | 1  | 0  | 0  | 2  |
| 3  | 0  | 0  | 0  | 0  | 2  |
| 2  | 2  | 0  | 0  | 2  | 1  |
| 3  | 2  | 0  | 0  | 2  | 1  |
| 1  | 1  | 2  | 0  | 2  | 2  |
| 3  | 1  | 0  | 0  | 0  | 0  |
| 2  | 2  | 1  | 0  | 0  | 1  |
| 3  | 1  | 2  | 0  | 0  | 2  |
| 3  | 2  | 0  | 0  | 0  | 2  |
| 3  | 2  | 0  | 0  | 0  | 0  |
| 2  | 1  | 0  | 0  | 0  | 1  |
| 2  | 2  | 0  | 2  | 2  | 2  |
| 3  | 2  | 2  | 2  | 2  | 2  |
| 2  | 1  | 2  | 1  | 0  | 1  |
| 2  | 1  | 1  | 0  | 0  | 0  |
| 2  | 1  | 1  | 0  | 0  | 0  |
| 3  | 0  | 1  | 0  | 0  | 2  |
| 3  | 0  | 0  | 0  | 0  | 1  |
| 3  | 1  | 1  | 2  | 2  | 2  |
| 1  | 1  | 1  | 0  | 0  | 1  |
| 4  | 0  | 0  | 0  | 0  | 0  |
| 4  | 0  | 0  | 0  | 0  | 2  |
| 3  | 1  | 0  | 0  | 0  | 2  |
| 2  | 0  | 0  | 0  | 0  | 1  |
| 1  | 0  | 1  | 2  | 0  | 1  |
| 3  | 0  | 0  | 0  | 0  | 1  |
| 3  | 1  | 0  | 0  | 0  | 1  |
| 3  | 2  | 0  | 2  | 0  | 2  |
| 3  | 2  | 2  | 2  | 2  | 2  |
| 1  | 1  | 0  | 0  | 0  | 0  |
| 2  | 1  | 1  | 0  | 0  | 1  |
| 3  | 99 | 99 | 99 | 99 | 99 |
| 3  | 2  | 0  | 0  | 0  | 0  |
| 1  | 1  | 0  | 1  | 0  | 1  |
| 3  | 1  | 2  | 0  | 0  | 1  |
| 2  | 2  | 2  | 2  | 2  | 2  |
| 2  | 1  | 0  | 0  | 0  | 1  |
| 1  | 1  | 0  | 2  | 2  | 2  |
| 2  | 2  | 0  | 0  | 0  | 1  |
| 3  | 2  | 2  | 2  | 2  | 0  |
| 1  | 2  | 0  | 1  | 0  | 2  |
| 3  | 2  | 0  | 0  | 1  | 2  |
| 99 | 2  | 0  | 0  | 0  | 2  |

|    |   |    |   |   |   |
|----|---|----|---|---|---|
| 3  | 2 | 0  | 0 | 2 | 2 |
| 2  | 2 | 1  | 0 | 0 | 2 |
| 3  | 0 | 99 | 0 | 0 | 2 |
| 3  | 2 | 2  | 2 | 2 | 2 |
| 99 | 1 | 1  | 1 | 1 | 1 |
| 1  | 2 | 1  | 0 | 0 | 0 |
| 3  | 1 | 2  | 2 | 2 | 2 |
| 3  | 2 | 0  | 0 | 0 | 2 |
| 4  | 2 | 2  | 2 | 2 | 2 |
| 3  | 2 | 2  | 2 | 2 | 2 |
| 2  | 2 | 0  | 0 | 0 | 1 |
| 4  | 2 | 2  | 2 | 2 | 2 |
| 3  | 2 | 2  | 2 | 2 | 2 |
| 4  | 2 | 1  | 0 | 2 | 2 |
| 3  | 0 | 0  | 0 | 0 | 0 |
| 4  | 2 | 99 | 1 | 1 | 1 |
| 3  | 2 | 1  | 0 | 2 | 2 |
| 2  | 2 | 2  | 0 | 0 | 0 |
| 3  | 1 | 1  | 0 | 0 | 2 |
| 4  | 2 | 0  | 0 | 2 | 1 |
| 2  | 2 | 2  | 2 | 2 | 2 |
| 3  | 2 | 2  | 1 | 0 | 2 |
| 3  | 2 | 2  | 0 | 2 | 2 |
| 4  | 2 | 2  | 2 | 2 | 2 |
| 4  | 2 | 0  | 0 | 0 | 2 |
| 4  | 2 | 2  | 2 | 2 | 2 |
| 4  | 2 | 2  | 0 | 0 | 0 |
| 4  | 2 | 2  | 2 | 2 | 2 |
| 1  | 2 | 0  | 2 | 2 | 2 |
| 2  | 2 | 2  | 2 | 0 | 2 |
| 3  | 2 | 2  | 2 | 0 | 2 |
| 2  | 1 | 1  | 1 | 2 | 0 |
| 4  | 1 | 2  | 2 | 2 | 2 |
| 3  | 2 | 0  | 0 | 0 | 2 |
| 3  | 2 | 2  | 2 | 2 | 0 |
| 3  | 2 | 0  | 0 | 1 | 2 |
| 3  | 1 | 0  | 2 | 0 | 1 |
| 1  | 2 | 1  | 1 | 0 | 0 |
| 3  | 2 | 2  | 2 | 2 | 2 |
| 3  | 0 | 2  | 2 | 2 | 2 |
| 4  | 2 | 0  | 0 | 2 | 2 |
| 4  | 2 | 2  | 2 | 2 | 2 |
| 4  | 2 | 0  | 0 | 2 | 1 |
| 3  | 0 | 0  | 1 | 0 | 2 |
| 4  | 2 | 0  | 2 | 0 | 2 |
| 2  | 2 | 2  | 2 | 0 | 2 |
| 3  | 2 | 2  | 0 | 2 | 2 |
| 3  | 2 | 1  | 0 | 0 | 0 |

|    |    |    |    |    |    |
|----|----|----|----|----|----|
| 4  | 2  | 2  | 0  | 2  | 1  |
| 3  | 1  | 0  | 0  | 0  | 1  |
| 4  | 2  | 0  | 0  | 0  | 1  |
| 3  | 2  | 0  | 0  | 2  | 2  |
| 4  | 2  | 1  | 1  | 0  | 0  |
| 3  | 2  | 2  | 0  | 2  | 2  |
| 3  | 2  | 2  | 0  | 0  | 2  |
| 99 | 2  | 1  | 99 | 99 | 99 |
| 3  | 1  | 1  | 0  | 1  | 1  |
| 4  | 2  | 0  | 0  | 2  | 2  |
| 3  | 2  | 2  | 2  | 2  | 2  |
| 99 | 1  | 2  | 0  | 2  | 1  |
| 3  | 2  | 0  | 2  | 2  | 1  |
| 3  | 2  | 0  | 1  | 1  | 1  |
| 2  | 2  | 2  | 0  | 2  | 2  |
| 3  | 2  | 0  | 1  | 0  | 1  |
| 3  | 0  | 1  | 0  | 0  | 1  |
| 2  | 0  | 2  | 0  | 2  | 2  |
| 3  | 2  | 0  | 0  | 2  | 1  |
| 3  | 2  | 2  | 0  | 2  | 0  |
| 3  | 1  | 0  | 0  | 0  | 1  |
| 4  | 2  | 0  | 0  | 2  | 1  |
| 3  | 2  | 0  | 0  | 2  | 2  |
| 1  | 1  | 0  | 0  | 0  | 1  |
| 2  | 0  | 0  | 0  | 2  | 2  |
| 99 | 2  | 2  | 2  | 2  | 2  |
| 2  | 2  | 0  | 99 | 0  | 0  |
| 3  | 99 | 99 | 99 | 99 | 99 |
| 4  | 2  | 0  | 0  | 0  | 1  |
| 4  | 1  | 0  | 0  | 0  | 2  |
| 3  | 2  | 2  | 0  | 2  | 2  |
| 1  | 2  | 2  | 0  | 2  | 2  |
| 2  | 0  | 1  | 0  | 0  | 2  |
| 3  | 2  | 1  | 0  | 2  | 2  |
| 4  | 0  | 1  | 0  | 2  | 1  |
| 4  | 0  | 2  | 1  | 0  | 2  |
| 1  | 1  | 1  | 0  | 0  | 1  |
| 2  | 2  | 0  | 0  | 0  | 1  |
| 1  | 0  | 1  | 0  | 0  | 0  |
| 3  | 2  | 2  | 0  | 0  | 1  |
| 3  | 2  | 0  | 2  | 2  | 2  |
| 3  | 2  | 1  | 0  | 1  | 2  |
| 3  | 2  | 2  | 2  | 2  | 2  |
| 3  | 99 | 1  | 0  | 2  | 2  |
| 3  | 2  | 2  | 2  | 1  | 2  |
| 2  | 2  | 1  | 0  | 2  | 1  |
| 4  | 1  | 2  | 0  | 0  | 0  |
| 4  | 2  | 1  | 0  | 0  | 1  |

|    |    |    |    |    |    |
|----|----|----|----|----|----|
| 1  | 2  | 1  | 0  | 1  | 0  |
| 3  | 2  | 2  | 2  | 0  | 1  |
| 3  | 1  | 0  | 2  | 2  | 2  |
| 3  | 2  | 2  | 0  | 0  | 2  |
| 99 | 99 | 99 | 99 | 99 | 99 |
| 3  | 99 | 99 | 99 | 99 | 99 |
| 2  | 99 | 99 | 99 | 99 | 99 |
| 2  | 99 | 99 | 99 | 99 | 99 |
| 1  | 99 | 99 | 99 | 99 | 99 |
| 2  | 99 | 99 | 99 | 99 | 99 |
| 3  | 99 | 99 | 99 | 99 | 99 |
| 3  | 99 | 99 | 99 | 99 | 99 |
| 3  | 99 | 99 | 99 | 99 | 99 |
| 4  | 99 | 99 | 99 | 99 | 99 |
| 3  | 99 | 99 | 99 | 99 | 99 |
| 2  | 99 | 99 | 99 | 99 | 99 |
| 3  | 99 | 99 | 99 | 99 | 99 |
| 3  | 99 | 99 | 99 | 99 | 99 |
| 1  | 99 | 99 | 99 | 99 | 99 |
| 3  | 99 | 99 | 99 | 99 | 99 |
| 4  | 99 | 99 | 99 | 99 | 99 |
| 4  | 99 | 99 | 99 | 99 | 99 |
| 4  | 99 | 99 | 99 | 99 | 99 |
| 3  | 99 | 99 | 99 | 99 | 99 |
| 2  | 99 | 99 | 99 | 99 | 99 |
| 1  | 99 | 99 | 99 | 99 | 99 |
| 3  | 99 | 99 | 99 | 99 | 99 |
| 3  | 99 | 99 | 99 | 99 | 99 |
| 4  | 99 | 99 | 99 | 99 | 99 |
| 3  | 99 | 99 | 99 | 99 | 99 |
| 4  | 99 | 99 | 99 | 99 | 99 |
| 3  | 99 | 99 | 99 | 99 | 99 |
| 2  | 99 | 99 | 99 | 99 | 99 |
| 3  | 99 | 99 | 99 | 99 | 99 |
| 2  | 99 | 99 | 99 | 99 | 99 |
| 1  | 99 | 99 | 99 | 99 | 99 |
| 3  | 99 | 99 | 99 | 99 | 99 |
| 3  | 99 | 99 | 99 | 99 | 99 |
| 3  | 99 | 99 | 99 | 99 | 99 |
| 3  | 99 | 99 | 99 | 99 | 99 |
| 4  | 99 | 99 | 99 | 99 | 99 |
| 2  | 99 | 99 | 99 | 99 | 99 |
| 3  | 99 | 99 | 99 | 99 | 99 |
| 3  | 99 | 99 | 99 | 99 | 99 |
| 3  | 99 | 99 | 99 | 99 | 99 |
| 1  | 99 | 99 | 99 | 99 | 99 |
| 1  | 99 | 99 | 99 | 99 | 99 |
| 3  | 2  | 2  | 0  | 2  | 2  |

|    |   |   |   |   |   |
|----|---|---|---|---|---|
| 3  | 2 | 1 | 2 | 0 | 1 |
| 3  | 0 | 0 | 0 | 2 | 2 |
| 3  | 2 | 0 | 2 | 2 | 2 |
| 3  | 2 | 1 | 2 | 2 | 2 |
| 4  | 2 | 1 | 2 | 2 | 2 |
| 3  | 0 | 2 | 0 | 0 | 2 |
| 1  | 2 | 2 | 2 | 2 | 2 |
| 3  | 2 | 1 | 0 | 0 | 2 |
| 4  | 2 | 2 | 0 | 2 | 2 |
| 3  | 2 | 0 | 0 | 0 | 1 |
| 3  | 2 | 2 | 2 | 2 | 2 |
| 3  | 2 | 0 | 0 | 2 | 2 |
| 4  | 1 | 0 | 0 | 0 | 1 |
| 3  | 2 | 1 | 2 | 1 | 1 |
| 3  | 2 | 2 | 0 | 2 | 2 |
| 3  | 2 | 2 | 0 | 0 | 2 |
| 4  | 2 | 0 | 0 | 0 | 2 |
| 4  | 2 | 2 | 0 | 2 | 2 |
| 3  | 2 | 0 | 0 | 1 | 1 |
| 4  | 2 | 2 | 2 | 2 | 2 |
| 4  | 2 | 2 | 0 | 0 | 2 |
| 3  | 2 | 2 | 0 | 2 | 2 |
| 2  | 2 | 1 | 0 | 0 | 1 |
| 4  | 2 | 2 | 0 | 2 | 1 |
| 4  | 2 | 0 | 0 | 0 | 1 |
| 4  | 0 | 0 | 0 | 0 | 2 |
| 3  | 2 | 1 | 0 | 0 | 2 |
| 3  | 1 | 0 | 0 | 0 | 1 |
| 99 | 2 | 2 | 2 | 2 | 2 |
| 3  | 2 | 2 | 2 | 2 | 2 |
| 99 | 2 | 2 | 0 | 2 | 2 |
| 4  | 0 | 0 | 0 | 0 | 1 |
| 3  | 2 | 2 | 1 | 2 | 1 |
| 2  | 2 | 0 | 0 | 0 | 2 |
| 3  | 2 | 0 | 0 | 0 | 1 |
| 3  | 2 | 0 | 0 | 0 | 2 |
| 3  | 2 | 0 | 0 | 0 | 0 |
| 2  | 2 | 0 | 2 | 0 | 1 |
| 2  | 0 | 0 | 2 | 0 | 1 |
| 2  | 2 | 2 | 0 | 0 | 2 |
| 2  | 2 | 2 | 2 | 2 | 2 |
| 1  | 2 | 2 | 0 | 0 | 2 |
| 99 | 2 | 2 | 0 | 0 | 2 |
| 3  | 2 | 1 | 0 | 0 | 2 |
| 4  | 2 | 2 | 0 | 0 | 0 |
| 3  | 2 | 2 | 2 | 1 | 2 |
| 4  | 2 | 0 | 0 | 2 | 2 |
| 2  | 2 | 0 | 2 | 0 | 2 |

|    |    |    |    |    |    |    |
|----|----|----|----|----|----|----|
| 3  | 2  | 2  | 2  | 2  | 2  | 2  |
| 3  | 2  | 0  | 2  | 0  | 0  | 2  |
| 3  | 1  | 0  | 0  | 0  | 0  | 2  |
| 3  | 2  | 2  | 0  | 0  | 0  | 2  |
| 1  | 2  | 2  | 0  | 0  | 0  | 1  |
| 1  | 2  | 0  | 0  | 0  | 0  | 2  |
| 3  | 0  | 0  | 0  | 0  | 2  | 0  |
| 4  | 1  | 2  | 0  | 0  | 0  | 2  |
| 3  | 2  | 2  | 0  | 0  | 2  | 2  |
| 3  | 2  | 2  | 2  | 2  | 2  | 2  |
| 1  | 99 | 99 | 1  | 1  | 1  | 1  |
| 2  | 2  | 1  | 0  | 0  | 1  | 2  |
| 3  | 2  | 1  | 0  | 0  | 0  | 0  |
| 2  | 2  | 0  | 0  | 0  | 0  | 1  |
| 3  | 1  | 1  | 1  | 1  | 1  | 1  |
| 3  | 1  | 1  | 1  | 1  | 1  | 1  |
| 4  | 2  | 0  | 2  | 2  | 2  | 1  |
| 2  | 2  | 2  | 2  | 2  | 1  | 0  |
| 3  | 1  | 0  | 0  | 0  | 0  | 1  |
| 4  | 1  | 2  | 0  | 0  | 1  | 2  |
| 3  | 2  | 0  | 0  | 0  | 0  | 1  |
| 2  | 2  | 99 | 0  | 0  | 0  | 1  |
| 2  | 1  | 1  | 0  | 0  | 0  | 2  |
| 2  | 1  | 0  | 2  | 0  | 0  | 1  |
| 1  | 1  | 0  | 0  | 0  | 0  | 1  |
| 3  | 2  | 2  | 2  | 2  | 2  | 2  |
| 3  | 0  | 1  | 1  | 0  | 0  | 0  |
| 2  | 2  | 0  | 0  | 0  | 0  | 2  |
| 2  | 1  | 1  | 0  | 0  | 0  | 1  |
| 2  | 2  | 2  | 2  | 2  | 2  | 2  |
| 3  | 0  | 0  | 0  | 0  | 0  | 0  |
| 2  | 1  | 0  | 2  | 0  | 0  | 1  |
| 3  | 1  | 0  | 0  | 0  | 0  | 1  |
| 1  | 1  | 0  | 0  | 0  | 0  | 1  |
| 4  | 1  | 0  | 0  | 0  | 0  | 1  |
| 2  | 1  | 2  | 0  | 0  | 2  | 2  |
| 1  | 2  | 0  | 0  | 0  | 0  | 1  |
| 3  | 1  | 0  | 2  | 0  | 0  | 1  |
| 4  | 1  | 0  | 0  | 0  | 0  | 1  |
| 2  | 0  | 0  | 0  | 0  | 0  | 1  |
| 3  | 1  | 2  | 0  | 0  | 0  | 2  |
| 3  | 1  | 1  | 1  | 1  | 1  | 1  |
| 99 | 1  | 2  | 0  | 0  | 0  | 1  |
| 2  | 2  | 2  | 0  | 0  | 0  | 1  |
| 2  | 99 | 99 | 99 | 99 | 99 | 99 |
| 3  | 2  | 0  | 0  | 0  | 0  | 1  |
| 3  | 1  | 0  | 1  | 0  | 0  | 1  |
| 3  | 1  | 0  | 0  | 0  | 0  | 1  |

|   |   |    |   |   |   |
|---|---|----|---|---|---|
| 4 | 1 | 0  | 0 | 0 | 1 |
| 1 | 0 | 0  | 1 | 0 | 1 |
| 1 | 0 | 1  | 1 | 1 | 0 |
| 3 | 0 | 0  | 0 | 0 | 2 |
| 3 | 1 | 0  | 0 | 0 | 1 |
| 1 | 0 | 0  | 1 | 0 | 1 |
| 2 | 2 | 2  | 2 | 2 | 2 |
| 2 | 0 | 0  | 2 | 2 | 2 |
| 2 | 1 | 0  | 0 | 0 | 1 |
| 4 | 2 | 2  | 2 | 2 | 2 |
| 2 | 2 | 0  | 0 | 0 | 2 |
| 2 | 2 | 0  | 0 | 2 | 1 |
| 1 | 2 | 1  | 0 | 2 | 2 |
| 3 | 2 | 0  | 0 | 0 | 0 |
| 3 | 1 | 0  | 0 | 0 | 1 |
| 2 | 2 | 2  | 1 | 2 | 2 |
| 4 | 1 | 2  | 0 | 0 | 2 |
| 4 | 2 | 2  | 0 | 0 | 2 |
| 2 | 2 | 1  | 0 | 0 | 0 |
| 2 | 2 | 0  | 0 | 0 | 1 |
| 4 | 2 | 0  | 2 | 2 | 0 |
| 4 | 2 | 2  | 2 | 2 | 1 |
| 3 | 2 | 2  | 0 | 2 | 1 |
| 3 | 2 | 1  | 0 | 0 | 2 |
| 3 | 2 | 2  | 0 | 0 | 2 |
| 4 | 0 | 0  | 0 | 0 | 1 |
| 3 | 2 | 1  | 0 | 0 | 0 |
| 4 | 2 | 2  | 2 | 2 | 2 |
| 1 | 2 | 1  | 0 | 0 | 1 |
| 4 | 2 | 2  | 2 | 2 | 2 |
| 3 | 2 | 2  | 2 | 2 | 2 |
| 3 | 2 | 2  | 0 | 2 | 2 |
| 3 | 2 | 0  | 0 | 0 | 1 |
| 3 | 2 | 2  | 0 | 2 | 2 |
| 3 | 1 | 0  | 0 | 0 | 0 |
| 3 | 2 | 99 | 0 | 0 | 1 |
| 2 | 2 | 99 | 0 | 0 | 2 |
| 3 | 2 | 0  | 0 | 0 | 2 |
| 3 | 2 | 2  | 0 | 2 | 2 |
| 2 | 2 | 1  | 0 | 0 | 2 |
| 1 | 1 | 1  | 0 | 2 | 1 |
| 3 | 2 | 2  | 0 | 2 | 2 |
| 2 | 2 | 0  | 2 | 2 | 2 |
| 1 | 2 | 2  | 0 | 2 | 1 |
| 4 | 2 | 1  | 0 | 0 | 2 |
| 2 | 2 | 2  | 0 | 2 | 2 |
| 2 | 2 | 2  | 1 | 2 | 0 |
| 3 | 2 | 1  | 0 | 2 | 2 |

|    |    |    |    |    |    |
|----|----|----|----|----|----|
| 2  | 2  | 0  | 0  | 0  | 1  |
| 3  | 1  | 0  | 1  | 0  | 1  |
| 3  | 2  | 1  | 0  | 1  | 0  |
| 4  | 1  | 0  | 0  | 0  | 2  |
| 4  | 1  | 0  | 0  | 0  | 1  |
| 1  | 2  | 2  | 0  | 2  | 2  |
| 3  | 2  | 2  | 2  | 2  | 2  |
| 2  | 1  | 0  | 0  | 0  | 1  |
| 1  | 1  | 0  | 0  | 0  | 1  |
| 3  | 1  | 0  | 0  | 0  | 2  |
| 3  | 1  | 1  | 0  | 0  | 1  |
| 4  | 2  | 2  | 0  | 0  | 2  |
| 99 | 1  | 0  | 2  | 0  | 1  |
| 3  | 1  | 0  | 0  | 0  | 1  |
| 4  | 1  | 0  | 0  | 0  | 2  |
| 3  | 1  | 1  | 0  | 0  | 1  |
| 3  | 2  | 2  | 0  | 0  | 0  |
| 1  | 0  | 1  | 0  | 0  | 2  |
| 1  | 2  | 0  | 0  | 0  | 0  |
| 2  | 2  | 0  | 0  | 0  | 0  |
| 3  | 2  | 2  | 0  | 0  | 2  |
| 2  | 2  | 0  | 0  | 0  | 2  |
| 3  | 1  | 0  | 0  | 0  | 2  |
| 3  | 2  | 0  | 0  | 0  | 2  |
| 3  | 2  | 2  | 2  | 2  | 2  |
| 3  | 2  | 2  | 2  | 2  | 2  |
| 3  | 2  | 1  | 2  | 1  | 2  |
| 3  | 2  | 0  | 0  | 2  | 2  |
| 4  | 2  | 2  | 2  | 2  | 2  |
| 3  | 2  | 2  | 0  | 2  | 2  |
| 3  | 2  | 0  | 0  | 0  | 1  |
| 99 | 2  | 2  | 2  | 2  | 2  |
| 3  | 2  | 0  | 0  | 0  | 2  |
| 3  | 2  | 1  | 2  | 0  | 1  |
| 4  | 2  | 0  | 0  | 0  | 1  |
| 2  | 1  | 1  | 0  | 0  | 1  |
| 4  | 1  | 0  | 2  | 0  | 1  |
| 2  | 1  | 0  | 0  | 0  | 1  |
| 2  | 1  | 0  | 0  | 0  | 1  |
| 3  | 99 | 99 | 99 | 99 | 99 |
| 1  | 1  | 2  | 0  | 0  | 1  |
| 4  | 1  | 0  | 0  | 0  | 0  |
| 2  | 1  | 0  | 0  | 2  | 1  |
| 3  | 1  | 1  | 0  | 2  | 1  |
| 3  | 1  | 1  | 2  | 2  | 2  |
| 3  | 2  | 2  | 2  | 2  | 2  |
| 3  | 1  | 2  | 0  | 0  | 1  |
| 2  | 2  | 0  | 0  | 2  | 1  |



|   |        |        |        |        |        |
|---|--------|--------|--------|--------|--------|
| 4 | 1      | 2      | 1      | 0      | 1      |
| 4 | 2      | 2      | 2      | 2      | 2      |
| 2 | 0      | 0      | 2      | 0      | 0      |
| 3 | 1      | 0      | 0      | 0      | 1      |
| 2 | 1      | 0      | 0      | 0      | 1      |
| 4 | 1      | 0      | 0      | 0      | 1      |
| 1 | 0      | 1      | 1      | 1      | 0      |
| 4 | 1      | 2      | 0      | 2      | 2      |
| 3 | 1      | 0      | 0      | 0      | 1      |
| 3 | 2      | 0      | 2      | 0      | 1      |
| 2 | 2      | 0      | 0      | 0      | 0      |
| 2 | 1      | 0      | 0      | 0      | 1      |
| 3 | 2      | 2      | 0      | 0      | 2      |
| 1 | 99     | 99     | 99     | 99     | 99     |
| 3 | 1      | 0      | 2      | 2      | 1      |
| 3 | 1      | 0      | 0      | 0      | 1      |
| 4 | 1      | 1      | 1      | 1      | 1      |
| 2 | 1      | 0      | 0      | 0      | 1      |
| 2 | 1      | 0      | 0      | 0      | 1      |
| 3 | 1      | 0      | 2      | 0      | 1      |
| 3 | 1      | 0      | 0      | 0      | 1      |
| 3 | 2      | 1      | 0      | 2      | 2      |
| 3 | 1      | 0      | 0      | 2      | 2      |
| 4 | 2      | 0      | 1      | 0      | 1      |
| 3 | 2      | 0      | 1      | 0      | 1      |
| 3 | 1      | 0      | 1      | 0      | 0      |
| 3 | 1      | 0      | 0      | 2      | 2      |
| 3 | 0      | 0      | 0      | 0      | 0      |
| 4 | #NULL! | #NULL! | #NULL! | #NULL! | #NULL! |
| 4 | #NULL! | #NULL! | #NULL! | #NULL! | #NULL! |
| 4 | #NULL! | #NULL! | #NULL! | #NULL! | #NULL! |
| 3 | #NULL! | #NULL! | #NULL! | #NULL! | #NULL! |
| 3 | #NULL! | #NULL! | #NULL! | #NULL! | #NULL! |
| 3 | #NULL! | #NULL! | #NULL! | #NULL! | #NULL! |
| 3 | #NULL! | #NULL! | #NULL! | #NULL! | #NULL! |
| 4 | #NULL! | #NULL! | #NULL! | #NULL! | #NULL! |
| 3 | #NULL! | #NULL! | #NULL! | #NULL! | #NULL! |
| 3 | #NULL! | #NULL! | #NULL! | #NULL! | #NULL! |
| 4 | #NULL! | #NULL! | #NULL! | #NULL! | #NULL! |
| 4 | #NULL! | #NULL! | #NULL! | #NULL! | #NULL! |
| 4 | #NULL! | #NULL! | #NULL! | #NULL! | #NULL! |
| 2 | #NULL! | #NULL! | #NULL! | #NULL! | #NULL! |
| 4 | #NULL! | #NULL! | #NULL! | #NULL! | #NULL! |
| 4 | #NULL! | #NULL! | #NULL! | #NULL! | #NULL! |
| 4 | #NULL! | #NULL! | #NULL! | #NULL! | #NULL! |
| 4 | #NULL! | #NULL! | #NULL! | #NULL! | #NULL! |
| 4 | #NULL! | #NULL! | #NULL! | #NULL! | #NULL! |
| 4 | #NULL! | #NULL! | #NULL! | #NULL! | #NULL! |
| 4 | #NULL! | #NULL! | #NULL! | #NULL! | #NULL! |
| 3 | #NULL! | #NULL! | #NULL! | #NULL! | #NULL! |





























































|   |        |        |        |        |        |        |
|---|--------|--------|--------|--------|--------|--------|
| 3 | #NULL! | #NULL! | #NULL! | #NULL! | #NULL! | #NULL! |
| 3 | #NULL! | #NULL! | #NULL! | #NULL! | #NULL! | #NULL! |
| 1 | #NULL! | #NULL! | #NULL! | #NULL! | #NULL! | #NULL! |
| 2 |        | 2      | 2      | 2      | 2      | 2      |
| 3 |        | 1      | 1      | 0      | 0      | 1      |
| 4 |        | 2      | 1      | 0      | 0      | 1      |
| 4 |        | 2      | 2      | 2      | 2      | 2      |
| 2 |        | 1      | 0      | 0      | 0      | 1      |
| 2 |        | 1      | 0      | 0      | 0      | 1      |
| 2 |        | 1      | 0      | 0      | 0      | 1      |
| 3 |        | 1      | 0      | 0      | 0      | 2      |
| 3 |        | 1      | 1      | 0      | 0      | 1      |
| 4 |        | 1      | 1      | 0      | 0      | 1      |
| 3 |        | 1      | 0      | 0      | 0      | 1      |
| 2 |        | 1      | 0      | 0      | 0      | 1      |
| 3 |        | 1      | 0      | 0      | 0      | 1      |
| 3 |        | 2      | 0      | 0      | 2      | 1      |
| 3 |        | 1      | 0      | 0      | 0      | 1      |
| 4 |        | 1      | 0      | 0      | 0      | 1      |
| 3 |        | 1      | 0      | 0      | 0      | 1      |
| 4 |        | 2      | 1      | 0      | 0      | 1      |
| 4 |        | 2      | 0      | 0      | 0      | 0      |
| 1 |        | 2      | 2      | 1      | 0      | 2      |
| 1 |        | 2      | 2      | 2      | 2      | 2      |
| 3 |        | 2      | 0      | 0      | 0      | 2      |
| 3 |        | 2      | 0      | 0      | 2      | 2      |
| 3 |        | 1      | 0      | 0      | 0      | 0      |
| 3 |        | 2      | 2      | 0      | 2      | 2      |
| 3 |        | 2      | 0      | 0      | 0      | 1      |
| 3 |        | 2      | 2      | 2      | 0      | 2      |
| 3 |        | 2      | 2      | 0      | 2      | 2      |
| 3 |        | 1      | 0      | 1      | 0      | 1      |
| 3 |        | 1      | 1      | 0      | 0      | 1      |
| 2 |        | 1      | 0      | 0      | 0      | 1      |
| 4 |        | 1      | 0      | 0      | 0      | 1      |
| 3 |        | 2      | 1      | 0      | 0      | 1      |
| 4 |        | 2      | 2      | 2      | 2      | 2      |
| 3 |        | 1      | 0      | 0      | 0      | 1      |
| 4 |        | 2      | 2      | 2      | 2      | 1      |
| 3 |        | 2      | 2      | 2      | 2      | 2      |
| 4 |        | 1      | 1      | 1      | 1      | 1      |
| 3 |        | 2      | 0      | 2      | 0      | 2      |
| 1 |        | 2      | 0      | 0      | 0      | 1      |
| 3 |        | 0      | 0      | 2      | 1      | 2      |
| 2 |        | 0      | 0      | 0      | 0      | 1      |
| 4 |        | 0      | 0      | 0      | 0      | 1      |
| 2 |        | 2      | 2      | 0      | 0      | 1      |
| 3 |        | 2      | 1      | 2      | 0      | 2      |

|        |        |        |        |        |        |
|--------|--------|--------|--------|--------|--------|
| 3      | 2      | 0      | 0      | 1      | 1      |
| 3      | 2      | 0      | 0      | 0      | 1      |
| 2      | 2      | 2      | 0      | 1      | 2      |
| 4      | 2      | 0      | 0      | 2      | 2      |
| 3      | 2      | 1      | 0      | 0      | 0      |
| 3      | 0      | 2      | 2      | 2      | 2      |
| 3      | 2      | 0      | 0      | 0      | 1      |
| 4      | 0      | 0      | 0      | 0      | 0      |
| 4      | 0      | 2      | 0      | 0      | 2      |
| 4      | 2      | 1      | 0      | 0      | 0      |
| 4      | 0      | 0      | 0      | 1      | 0      |
| 4      | 1      | 1      | 1      | 1      | 1      |
| #NULL! | #NULL! | #NULL! | #NULL! | #NULL! | #NULL! |
| 3      | 2      | 2      | 2      | 0      | 2      |
| 2      | 1      | 0      | 2      | 0      | 2      |
| 3      | 0      | 0      | 0      | 0      | 2      |
| 2      | 2      | 2      | 2      | 2      | 2      |
| 2      | 2      | 2      | 2      | 2      | 2      |
| 3      | 2      | 2      | 2      | 2      | 2      |
| 4      | 2      | 2      | 0      | 2      | 2      |
| 3      | 1      | 0      | 0      | 0      | 1      |
| 1      | 2      | 2      | 2      | 2      | 2      |
| 2      | 0      | 0      | 0      | 0      | 0      |
| 4      | 2      | 2      | 2      | 2      | 2      |
| 1      | 2      | 2      | 0      | 0      | 2      |
| 3      | 2      | 2      | 2      | 2      | 2      |
| 3      | 0      | 1      | 0      | 0      | 1      |
| 3      | 1      | 2      | 2      | 2      | 2      |
| 2      | 2      | 2      | 2      | 2      | 2      |
| 4      | 2      | 2      | 2      | 2      | 2      |
| 3      | 1      | 2      | 2      | 2      | 2      |
| 3      | 0      | 0      | 2      | 2      | 2      |
| 4      | 2      | 0      | 2      | 0      | 1      |
| 3      | 0      | 2      | 2      | 2      | 2      |
| 3      | 1      | 0      | 2      | 0      | 2      |
| 3      | 0      | 0      | 2      | 2      | 2      |
| 3      | 2      | 2      | 2      | 2      | 2      |
| 3      | 2      | 2      | 2      | 0      | 2      |
| 4      | 2      | 2      | 2      | 2      | 2      |
| 4      | 2      | 2      | 2      | 2      | 2      |
| 4      | 1      | 0      | 2      | 0      | 2      |
| 4      | 2      | 2      | 2      | 2      | 2      |
| 3      | 2      | 2      | 2      | 2      | 2      |
| 3      | 2      | 2      | 2      | 0      | 2      |
| 3      | 1      | 1      | 2      | 2      | 0      |
| 3      | 2      | 2      | 0      | 0      | 2      |
| 4      | 1      | 1      | 0      | 0      | 1      |
| 4      | 1      | 1      | 0      | 0      | 1      |

|        |        |        |        |        |        |
|--------|--------|--------|--------|--------|--------|
| 3      | 1      | 1      | 0      | 0      | 1      |
| 4      | 1      | 1      | 0      | 0      | 1      |
| 3      | 1      | 1      | 0      | 0      | 1      |
| 3      | 1      | 1      | 0      | 0      | 1      |
| 4      | 1      | 1      | 0      | 0      | 1      |
| 3      | 1      | 1      | 0      | 0      | 1      |
| 4      | 1      | 1      | 0      | 0      | 1      |
| 3      | 1      | 1      | 0      | 0      | 1      |
| 3      | 1      | 1      | 0      | 0      | 1      |
| 4      | 1      | 0      | 0      | 0      | 1      |
| #NULL! | 1      | 1      | 0      | 0      | 1      |
| 4      | 1      | 1      | 0      | 0      | 1      |
| 4      | 1      | 2      | 0      | 0      | 1      |
| 3      | 1      | 0      | 0      | 0      | 2      |
| 3      | 1      | 0      | 0      | 0      | 1      |
| 3      | 2      | 0      | 0      | 0      | 1      |
| #NULL! | #NULL! | #NULL! | #NULL! | #NULL! | #NULL! |
| 3      | 1      | 0      | 0      | 0      | 1      |
| 3      | 1      | 1      | 0      | 0      | 1      |
| 3      | 1      | 2      | 0      | 0      | 1      |
| 4      | 1      | 0      | 0      | 0      | 1      |































































































































2  
2  
2  
0  
2  
2  
2  
2  
2  
2  
0  
2  
2  
2  
2  
2  
2  
2  
0  
2  
2  
2  
2
